# Supplementary material for: LncSNHG1 Promoted CRC Proliferation through the miR-181b-5p/SMAD2 Axis
Source: Hindawi journal article supplement (doi:10.1155/2022/4181730), 2022-03-11
Supplement: f1 [file 4181730.f1.pdf]

# Fold Change cut-off: **2.0**  
 # P-value cut-off: **0.05**  
 # Condition pairs: **Ca\_vs\_N**

# Column A: ProbeName it represents probe name.  
 # Column B: P-value, P-value calculated from paired t-test.  
 # Column C: FDR, FDR is calculated from Benjamini Hochberg FDR.  
 # Column D: Fold Change, the absolute ratio (no log scale) of normalized intensities between two conditions.  
 # Column E: Regulation, it depicts which group has greater or lower intensity values wrt other group.  
 # Column F ~ X: Annotations, include type, seqname, GeneSymbol, source, RNALength, chrom, strand, txStart, txEnd, Xhyb, Sequence  
 # Column Y, Z: Raw Intensity of each group (averaged raw intensities of replicate samples).  
 # Column AA, AB: Normalized Intensity of each group (averaged normalized intensities of replicate samples, log2 transformed).  
 # Column AC ~ AN: Raw Intensity of each sample.  
 # Column AO ~ AZ: Normalized Intensity of each sample (log2 transformed).

Note:

# Column I: source, the source of LncRNA is collected from.

RefSeq: transcripts collected from RefSeq database;

UCSC\_knowngene: UCSC known genes annotated as "non-coding", "near-coding" or "antisense" (<http://genome.ucsc.edu/cgi-bin/hgT>);

GENCODE: the GENCODE project (<http://www.gencodegenes.org/>);

pseudogene: pseudogene tagged by GENCODE;

RNAdb: RNAdb2.0 (<http://research.imb.uq.edu.au/rnadb/>);

NRED: NRED (<http://jsm-research.imb.uq.edu.au/nred/cgi-bin/ncrnadb.pl>);

UCR: "ultra-conserved region" among human, mouse and rat (<http://users.soe.ucsc.edu/~jill/ultra.html>);

LincRNAs identified by Khalil et al: lincRNA identified by searching for regions of chromatin methylation (H3K4me3 and H3K36me3)

LincRNAs identified by Cabili et al: lincRNA identified by RNA sequencing results and public database information (Cabili et al. 2011)

# Columns R ~ X: the relationship of LncRNA and its nearby coding gene and the coordinate of the coding gene, including relationship  
 "exon sense-overlapping": the LncRNA's exon is overlapping a coding transcript exon on the same genomic strand;  
 "intronic": the LncRNA is overlapping the intron of a coding transcript on the same genomic strand;  
 "natural antisense": the LncRNA is transcribed from the antisense strand and overlapping with a coding transcript;  
 "non-overlapping antisense": the LncRNA is transcribed from the antisense strand without sharing overlapping exons;  
 "bidirectional": the LncRNA is oriented head to head to a coding transcript within 1000 bp;

| ProbeName     | P-value and FDR |             | Fold change and Regulation |            | type      |
|---------------|-----------------|-------------|----------------------------|------------|-----------|
|               | P-value         | FDR         | Fold Change                | Regulation |           |
| ASHGA5P048339 | 0.007751341     | 0.055296161 | 2.3111905                  | up         | noncoding |
| ASHGA5P022755 | 0.019265156     | 0.084591728 | 2.1117804                  | up         | noncoding |
| ASHGA5P025811 | 0.009535972     | 0.060604099 | 2.359045                   | up         | noncoding |
| ASHGA5P036006 | 0.033871172     | 0.116094281 | 6.8546918                  | up         | noncoding |
| ASHGA5P031308 | 0.007618346     | 0.054807128 | 4.8948916                  | up         | noncoding |
| ASHGA5P031308 | 0.007618346     | 0.054807128 | 4.8948916                  | up         | noncoding |
| ASHGA5P053098 | 0.002261405     | 0.031214119 | 2.1295967                  | up         | noncoding |
| ASHGA5P044704 | 0.047013662     | 0.139917379 | 2.2288412                  | up         | noncoding |
| ASHGA5P052532 | 0.002638213     | 0.03325916  | 2.3669846                  | up         | noncoding |
| ASHGA5P031045 | 0.03507684      | 0.11853671  | 2.6912156                  | up         | noncoding |
| ASHGA5P016725 | 0.047808496     | 0.141601172 | 3.3080024                  | up         | noncoding |
| ASHGA5P057014 | 0.006439967     | 0.051060618 | 3.0052361                  | up         | noncoding |
| ASHGA5P057014 | 0.006439967     | 0.051060618 | 3.0052361                  | up         | noncoding |
| ASHGA5P057014 | 0.006439967     | 0.051060618 | 3.0052361                  | up         | noncoding |
| ASHGA5P058383 | 0.025109046     | 0.098439971 | 2.828986                   | up         | noncoding |
| ASHGA5P029189 | 0.011239526     | 0.065435608 | 3.7370768                  | up         | noncoding |
| ASHGA5P029189 | 0.011239526     | 0.065435608 | 3.7370768                  | up         | noncoding |
| ASHGA5P029189 | 0.011239526     | 0.065435608 | 3.7370768                  | up         | noncoding |
| ASHGA5P028767 | 0.037740113     | 0.123372227 | 2.0600623                  | up         | noncoding |
| ASHGA5P043319 | 0.049820831     | 0.145340561 | 2.5839818                  | up         | noncoding |
| ASHGA5P031317 | 0.016529192     | 0.078449075 | 2.1525162                  | up         | noncoding |
| ASHGA5P031044 | 0.013792508     | 0.07198363  | 2.5825664                  | up         | noncoding |
| ASHGA5P044460 | 0.014786507     | 0.074317791 | 5.2358818                  | up         | noncoding |
| ASHGA5P036879 | 0.002009657     | 0.029606317 | 3.446467                   | up         | noncoding |

e, EntrezID, relationship, Associated\_gene\_acc, Associated\_gene\_name, Associated\_protein\_name, Associated\_gene\_strand, Ass

ables/);

b) outside of known protein-coding loci (Guttman et al. 2009; Khalil et al. 2009);  
l).

o, Associated\_gene\_acc, Associated\_gene\_name, Associated\_protein\_name, Associated\_gene\_strand, Associated\_gene\_start and

| seqname         | GeneSymbol    | source              | RNAlength | chrom | strand |
|-----------------|---------------|---------------------|-----------|-------|--------|
| ENST00000528781 | RP11-672A2.6  | GENCODE             | 831       | chr11 | -      |
| ENST00000562227 | ZNF192P1      | GENCODE             | 1113      | chr6  | +      |
| NR_038209       | LOC100616530  | RefSeq              | 377       | chr8  | +      |
| ENST00000450072 | AC017099.3    | GENCODE             | 587       | chr2  | +      |
| ENST00000454068 | GAS5          | GENCODE             | 688       | chr1  | -      |
| ENST00000454068 | GAS5          | GENCODE             | 688       | chr1  | -      |
| uc003tuh.3      | CCT6P1        | UCSC_knowngene      | 1675      | chr7  | +      |
| ENST00000511897 | RP11-87E22.2  | GENCODE             | 3879      | chr8  | +      |
| ENST00000504756 | RP11-423H2.1  | GENCODE             | 489       | chr5  | +      |
| ENST00000565783 | RP11-673P17.2 | GENCODE             | 499       | chr16 | -      |
| ENST00000433505 | RP11-426L16.8 | GENCODE             | 767       | chr1  | -      |
| TCONS_00011960  | XLOC_005473   | LincRNAs identified | 462       | chr6  | +      |
| TCONS_00011960  | XLOC_005473   | LincRNAs identified | 462       | chr6  | +      |
| TCONS_00011960  | XLOC_005473   | LincRNAs identified | 462       | chr6  | +      |
| uc002lal.1      | LOC647946     | UCSC_knowngene      | 2306      | chr18 | -      |
| NR_046321       | GPX2          | RefSeq              | 1310      | chr14 | -      |
| NR_046321       | GPX2          | RefSeq              | 1310      | chr14 | -      |
| NR_046321       | GPX2          | RefSeq              | 1310      | chr14 | -      |
| ENST00000443576 | RP11-141M1.1  | GENCODE             | 466       | chr13 | +      |
| NR_046216       | MGC27345      | RefSeq              | 10079     | chr7  | -      |
| ENST00000563408 | RP11-264L1.4  | GENCODE             | 719       | chr16 | -      |
| ENST00000443373 | AC002331.1    | GENCODE             | 294       | chr16 | -      |
| ENST00000577199 | RP11-1C8.6    | GENCODE             | 777       | chr8  | -      |
| NR_024470       | LOC100127888  | RefSeq              | 1440      | chr20 | -      |

ociated\_gene\_start and Associated\_gene\_end.

Associated\_gene\_end.

| Annotations |           |                    |                            |           |                      |
|-------------|-----------|--------------------|----------------------------|-----------|----------------------|
| txStart     | txEnd     | Xhyb               | Sequence                   | EntrezID  | relationship         |
| 76336505    | 76337878  |                    | AATTTGTTCTGATCCTAAGGTCACT  |           | intergenic           |
| 28130400    | 28134936  |                    | ACATGAACAGTACCTGCTACATAGG  |           | intergenic           |
| 96281063    | 96822371  | NR_038205          | ATCAAGGATTA                | 100616530 | intronic antisense   |
| 98280679    | 98292184  |                    | GCCCTCTCCAAGGAGCCGCCCTG    |           | bidirectional        |
| 173833048   | 173836953 |                    | GCATGCGTGACC               | 60674     | bidirectional        |
| 173833048   | 173836953 |                    | GCATGCGTGACC               | 60674     | bidirectional        |
| 65216091    | 65228662  | NR_003110, uc003tt | TTTCTTTTCTTCC              | 643253    | intergenic           |
| 22735496    | 22745535  |                    | GGTTAGCTTTTCACTGTGACCCTTA  |           | intronic antisense   |
| 177309391   | 177310001 |                    | CTTTAGACAAGTATGTTTCTGTTTTC |           | intergenic           |
| 27078248    | 27079179  |                    | TTTTCTGGGAGACTCTGGCTGCTGG  |           | natural antisense    |
| 113362791   | 113392437 |                    | GCGCTTAATGCAACGCGAATGAAAT  |           | intergenic           |
| 136871938   | 136872729 |                    | AAGTAGCCAGAAACAGATTATTGGC  |           | natural antisense    |
| 136871938   | 136872729 |                    | AAGTAGCCAGAAACAGATTATTGGC  |           | natural antisense    |
| 136871938   | 136872729 |                    | AAGTAGCCAGAAACAGATTATTGGC  |           | natural antisense    |
| 36786887    | 37380282  |                    | ACATTTTTGGCGC              | 647946    | intron sense-overlap |
| 65405869    | 65409623  |                    | CCATCTCTTCAGC              | 2877      | exon sense-overlapp  |
| 65405869    | 65409623  |                    | CCATCTCTTCAGC              | 2877      | intronic antisense   |
| 65405869    | 65409623  |                    | CCATCTCTTCAGC              | 2877      | intronic antisense   |
| 33907982    | 33909403  |                    | GCTTTGTCTCCTGTGAGGGACTTTTC |           | intronic antisense   |
| 127937737   | 127947816 |                    | GTGATCCTTTGCTI             | 157247    | intergenic           |
| 78529822    | 78540465  |                    | AGACTGTGGTTATCCGTTTAAAGAT  |           | intronic antisense   |
| 26596075    | 26606134  |                    | TATTTATTTGCTTCGAGTCATCCGG  |           | intergenic           |
| 104395305   | 104396082 |                    | TGTCTGATATTCTCTACCAAATGGT  |           | intergenic           |
| 61294378    | 61297973  |                    | AGAACTGACATA               | 100127888 | natural antisense    |

Associated\_gene\_acc associated\_gene\_name associated\_protein\_name associated\_gene\_strand associated\_gene\_start Associated\_gene\_end

|                 |             |                                                            |   |           |           |
|-----------------|-------------|------------------------------------------------------------|---|-----------|-----------|
| NM_177965       | C8orf37     | protein C8orf37                                            | - | 96257140  | 96281462  |
| NM_005735       | ACTR1B      | beta-actin                                                 | - | 98272401  | 98280561  |
| NM_001122770    | ZBTB37      | zinc finger and BTB                                        | + | 173837492 | 173855774 |
| NM_032522       | ZBTB37      | zinc finger and BTB                                        | + | 173837492 | 173842778 |
| NM_144962       | PEBP4       | phosphatidylethanolamine phosphatase                       | - | 22570764  | 22785421  |
| NM_001145545    | C16orf82    | protein TNT                                                | + | 27078218  | 27080487  |
| NM_001198616    | MAP7        | ensconsin isoform 6                                        | - | 136663418 | 136871957 |
| NM_001198617    | MAP7        | ensconsin isoform 7                                        | - | 136663418 | 136871957 |
| NM_003980       | MAP7        | ensconsin isoform 3                                        | - | 136663418 | 136871957 |
| ENST00000321566 | AC011139.1  |                                                            | - | 36914835  | 36915639  |
| NM_002083       | GPX2        | glutathione peroxidase 2                                   | - | 65405869  | 65409623  |
| NM_001202558    | CHURC1-FNTB | CHURC1-FNTB protein                                        | + | 65381078  | 65529373  |
| NM_001202559    | CHURC1-FNTB | CHURC1-FNTB protein                                        | + | 65381078  | 65529373  |
| NM_001243476    | STARD13     | stAR-related lipid transfer domain-containing protein 13   | - | 33677271  | 34250932  |
| NM_016373       | WWOX        | WW domain-containing protein 1                             | + | 78133326  | 79246564  |
| NM_016354       | SLCO4A1     | solute carrier organic anion transporter family 4 member 1 | + | 61273796  | 61303647  |

| Ca_vs_N 2.0 fold up regulated LncRNAs |              |                             |                    |                    |                    |
|---------------------------------------|--------------|-----------------------------|--------------------|--------------------|--------------------|
| Group--Raw Intensity                  |              | Group--Normalized Intensity |                    |                    |                    |
| group-Ca(raw)                         | group-N(raw) | roup-Ca(normalized          | group-N(normalized | D653416ca, Ca](raw | D906882ca, Ca](raw |
| 521.236287                            | 145.618854   | 8.606321                    | 7.397685           | 701.23004          | 708.5937           |
| 35.909392                             | 11.69552     | 4.77936                     | 3.7009             | 41.489788          | 39.38305           |
| 58.959329                             | 18.396287    | 5.532493                    | 4.29429            | 74.237045          | 65.81788           |
| 2978.525267                           | 482.50618    | 10.791963                   | 8.014871           | 2854.056           | 4203.8975          |
| 338.514105                            | 25.655149    | 7.13181                     | 4.840533           | 574.50964          | 972.5552           |
| 338.514105                            | 25.655149    | 7.13181                     | 4.840533           | 574.50964          | 972.5552           |
| 450.98248                             | 134.334785   | 8.380854                    | 7.290274           | 567.7949           | 664.931            |
| 27.828951                             | 10.271292    | 4.44439                     | 3.288096           | 39.244167          | 30.575663          |
| 177.755123                            | 43.596736    | 6.988593                    | 5.745543           | 242.10977          | 324.24713          |
| 268.722891                            | 55.662834    | 7.231483                    | 5.803225           | 462.68167          | 560.0925           |
| 111.561014                            | 24.018175    | 6.127749                    | 4.401789           | 72.85013           | 21.392817          |
| 301.147738                            | 76.12397     | 7.851259                    | 6.263781           | 336.76633          | 374.6509           |
| 301.147738                            | 76.12397     | 7.851259                    | 6.263781           | 336.76633          | 374.6509           |
| 301.147738                            | 76.12397     | 7.851259                    | 6.263781           | 336.76633          | 374.6509           |
| 35.728591                             | 8.746354     | 4.66884                     | 3.168555           | 52.461937          | 60.489105          |
| 733.2356                              | 120.201241   | 9.030063                    | 7.128153           | 866.2029           | 742.7116           |
| 733.2356                              | 120.201241   | 9.030063                    | 7.128153           | 866.2029           | 742.7116           |
| 733.2356                              | 120.201241   | 9.030063                    | 7.128153           | 866.2029           | 742.7116           |
| 43.075468                             | 15.397533    | 5.06804                     | 4.025352           | 62.486214          | 37.331673          |
| 44.521967                             | 15.785481    | 5.073989                    | 3.704394           | 26.654587          | 38.05219           |
| 100.387207                            | 25.676739    | 5.821051                    | 4.715027           | 138.38448          | 11.686821          |
| 25.604005                             | 8.300992     | 4.311216                    | 2.942411           | 22.408657          | 12.41473           |
| 72.564953                             | 10.714251    | 5.68193                     | 3.293498           | 68.462944          | 26.004223          |
| 129.379177                            | 20.19021     | 6.381002                    | 4.595884           | 108.863716         | 134.41585          |

| Raw Intensity                                                                                                |           |           |           |           |           |
|--------------------------------------------------------------------------------------------------------------|-----------|-----------|-----------|-----------|-----------|
| D896032ca, Ca](rawD907028ca, Ca](rawD907020ca, Ca](rawD907993ca, Ca](raw[D653416N, N](raw)[D906882N, N](raw) |           |           |           |           |           |
| 413.7801                                                                                                     | 424.84366 | 440.93668 | 438.03354 | 150.22527 | 59.176517 |
| 20.136517                                                                                                    | 49.170868 | 41.8576   | 23.418531 | 9.9137335 | 6.5364704 |
| 48.38091                                                                                                     | 60.914238 | 48.229584 | 56.176315 | 17.203497 | 7.693875  |
| 1036.6749                                                                                                    | 686.7432  | 4489.353  | 4600.427  | 611.4182  | 105.03289 |
| 60.51464                                                                                                     | 266.76495 | 28.13043  | 128.60977 | 35.467472 | 37.7445   |
| 60.51464                                                                                                     | 266.76495 | 28.13043  | 128.60977 | 35.467472 | 37.7445   |
| 349.00513                                                                                                    | 294.79095 | 421.9564  | 407.4165  | 160.45369 | 92.50319  |
| 24.848732                                                                                                    | 32.173683 | 23.462017 | 16.669443 | 4.9999995 | 4.9999995 |
| 104.163216                                                                                                   | 111.7233  | 138.20421 | 146.08311 | 46.951527 | 36.258213 |
| 124.60716                                                                                                    | 39.888096 | 245.65598 | 179.41194 | 61.298462 | 40.15523  |
| 92.18123                                                                                                     | 75.00262  | 213.32877 | 194.61052 | 8.819644  | 9.113771  |
| 271.45782                                                                                                    | 222.0042  | 287.44858 | 314.5586  | 81.26021  | 22.791517 |
| 271.45782                                                                                                    | 222.0042  | 287.44858 | 314.5586  | 81.26021  | 22.791517 |
| 271.45782                                                                                                    | 222.0042  | 287.44858 | 314.5586  | 81.26021  | 22.791517 |
| 35.474648                                                                                                    | 32.96204  | 17.422508 | 15.56131  | 7.9417644 | 4.9999995 |
| 826.628                                                                                                      | 1051.5957 | 278.1006  | 634.1748  | 71.1748   | 58.766407 |
| 826.628                                                                                                      | 1051.5957 | 278.1006  | 634.1748  | 71.1748   | 58.766407 |
| 826.628                                                                                                      | 1051.5957 | 278.1006  | 634.1748  | 71.1748   | 58.766407 |
| 32.06283                                                                                                     | 54.47896  | 31.355173 | 40.73796  | 8.303433  | 6.0995855 |
| 32.59347                                                                                                     | 73.52329  | 37.887123 | 58.421143 | 6.9330144 | 8.510804  |
| 250.86983                                                                                                    | 81.437935 | 43.772835 | 76.17134  | 29.109201 | 8.593746  |
| 29.891024                                                                                                    | 32.169693 | 21.502033 | 35.237892 | 4.9999995 | 4.9999995 |
| 42.51814                                                                                                     | 125.97678 | 67.45905  | 104.96858 | 8.114567  | 7.2433486 |
| 65.94291                                                                                                     | 316.6986  | 39.270664 | 111.08332 | 22.374916 | 19.501812 |

| [D896032N, N](raw) | [D907028N, N](raw) | [D907020N, N](raw) | [D907993N, N](raw) | 3416ca, Ca](normal) | 6882ca, Ca](normal) |
|--------------------|--------------------|--------------------|--------------------|---------------------|---------------------|
| 260.0895           | 135.14519          | 165.20227          | 103.87438          | 8.983642            | 9.145328            |
| 21.121117          | 11.793231          | 14.04992           | 6.7586465          | 4.912071            | 5.1963964           |
| 40.88422           | 17.270199          | 11.833471          | 15.492462          | 5.7586894           | 5.8674517           |
| 1886.0549          | 63.087734          | 175.0605           | 54.382854          | 10.994306           | 11.60719            |
| 6.893377           | 25.721725          | 18.35774           | 29.746078          | 8.691224            | 9.583754            |
| 6.893377           | 25.721725          | 18.35774           | 29.746078          | 8.691224            | 9.583754            |
| 236.90973          | 78.85111           | 153.86691          | 83.42408           | 8.672012            | 9.054823            |
| 18.938002          | 10.473421          | 16.001307          | 6.2150245          | 4.8327775           | 4.868408            |
| 59.219543          | 40.592308          | 46.46869           | 32.090134          | 7.4686575           | 8.060068            |
| 141.0243           | 21.620937          | 44.088657          | 25.78942           | 8.375926            | 8.818264            |
| 10.615991          | 71.12097           | 10.09442           | 34.344254          | 5.730055            | 4.3837647           |
| 168.43176          | 38.851326          | 100.585495         | 44.82351           | 7.942898            | 8.257078            |
| 168.43176          | 38.851326          | 100.585495         | 44.82351           | 7.942898            | 8.257078            |
| 168.43176          | 38.851326          | 100.585495         | 44.82351           | 7.942898            | 8.257078            |
| 15.327759          | 5.920527           | 12.46464           | 5.823436           | 5.245638            | 5.7565713           |
| 119.5573           | 110.42678          | 221.3739           | 139.90826          | 9.29452             | 9.214978            |
| 119.5573           | 110.42678          | 221.3739           | 139.90826          | 9.29452             | 9.214978            |
| 119.5573           | 110.42678          | 221.3739           | 139.90826          | 9.29452             | 9.214978            |
| 25.677794          | 20.025187          | 22.463808          | 9.815391           | 5.509778            | 5.128319            |
| 54.473125          | 11.180479          | 8.337253           | 5.2782083          | 4.2801223           | 5.152038            |
| 59.859257          | 20.091463          | 20.11817           | 16.288599          | 6.658198            | 3.604756            |
| 4.9999995          | 13.414929          | 16.391022          | 4.9999995          | 4.023713            | 3.6852622           |
| 31.18494           | 4.9999995          | 7.74265            | 4.9999995          | 5.636147            | 4.6521797           |
| 10.739248          | 30.758354          | 19.547043          | 18.219889          | 6.3198314           | 6.837971            |

| Normalized Intensity                                                                                         |           |           |           |           |           |
|--------------------------------------------------------------------------------------------------------------|-----------|-----------|-----------|-----------|-----------|
| 6032ca, Ca](normal7028ca, Ca](normal7020ca, Ca](normal7993ca, Ca](normal53416N, N](normali06882N, N](normali |           |           |           |           |           |
| 8.350713                                                                                                     | 8.422825  | 8.526192  | 8.209225  | 7.469465  | 6.7379923 |
| 4.0103726                                                                                                    | 5.227714  | 5.229281  | 4.1003222 | 3.531339  | 3.4656787 |
| 5.2791033                                                                                                    | 5.552244  | 5.420487  | 5.316983  | 4.3421073 | 3.7043612 |
| 9.641417                                                                                                     | 9.1190405 | 11.829823 | 11.560001 | 9.539011  | 7.560299  |
| 5.608146                                                                                                     | 7.741766  | 4.685355  | 6.4806123 | 5.382128  | 6.080709  |
| 5.608146                                                                                                     | 7.741766  | 4.685355  | 6.4806123 | 5.382128  | 6.080709  |
| 8.107872                                                                                                     | 7.8884397 | 8.462235  | 8.099743  | 7.573084  | 7.3820157 |
| 4.3236876                                                                                                    | 4.563595  | 4.44253   | 3.6353405 | 2.3467326 | 2.4279919 |
| 6.386155                                                                                                     | 6.4606647 | 6.8895445 | 6.666469  | 5.782229  | 6.0284534 |
| 6.6394205                                                                                                    | 4.897938  | 7.6961527 | 6.961197  | 6.1719832 | 6.17163   |
| 6.2053905                                                                                                    | 5.8704934 | 7.4954977 | 7.0812917 | 3.353395  | 3.9634771 |
| 7.7516103                                                                                                    | 7.483323  | 7.923947  | 7.748699  | 6.568746  | 5.3382306 |
| 7.7516103                                                                                                    | 7.483323  | 7.923947  | 7.748699  | 6.568746  | 5.3382306 |
| 7.7516103                                                                                                    | 7.483323  | 7.923947  | 7.748699  | 6.568746  | 5.3382306 |
| 4.8332005                                                                                                    | 4.6008844 | 4.0373206 | 3.5394244 | 3.189217  | 2.4279919 |
| 9.342271                                                                                                     | 9.722648  | 7.874619  | 8.731342  | 6.384901  | 6.7269187 |
| 9.342271                                                                                                     | 9.722648  | 7.874619  | 8.731342  | 6.384901  | 6.7269187 |
| 9.342271                                                                                                     | 9.722648  | 7.874619  | 8.731342  | 6.384901  | 6.7269187 |
| 4.690253                                                                                                     | 5.3797708 | 4.8281054 | 4.872012  | 3.259294  | 3.3587208 |
| 4.715403                                                                                                     | 5.8396645 | 5.0914106 | 5.3652983 | 2.9880579 | 3.8610795 |
| 7.6389804                                                                                                    | 5.9904175 | 5.292761  | 5.7411933 | 5.093396  | 3.875915  |
| 4.593603                                                                                                     | 4.563217  | 4.323081  | 4.678421  | 2.3467326 | 2.4279919 |
| 5.0878735                                                                                                    | 6.6453767 | 5.876195  | 6.193809  | 3.223689  | 3.6186695 |
| 5.735646                                                                                                     | 7.9841433 | 5.136381  | 6.2720404 | 4.7211723 | 5.1111193 |



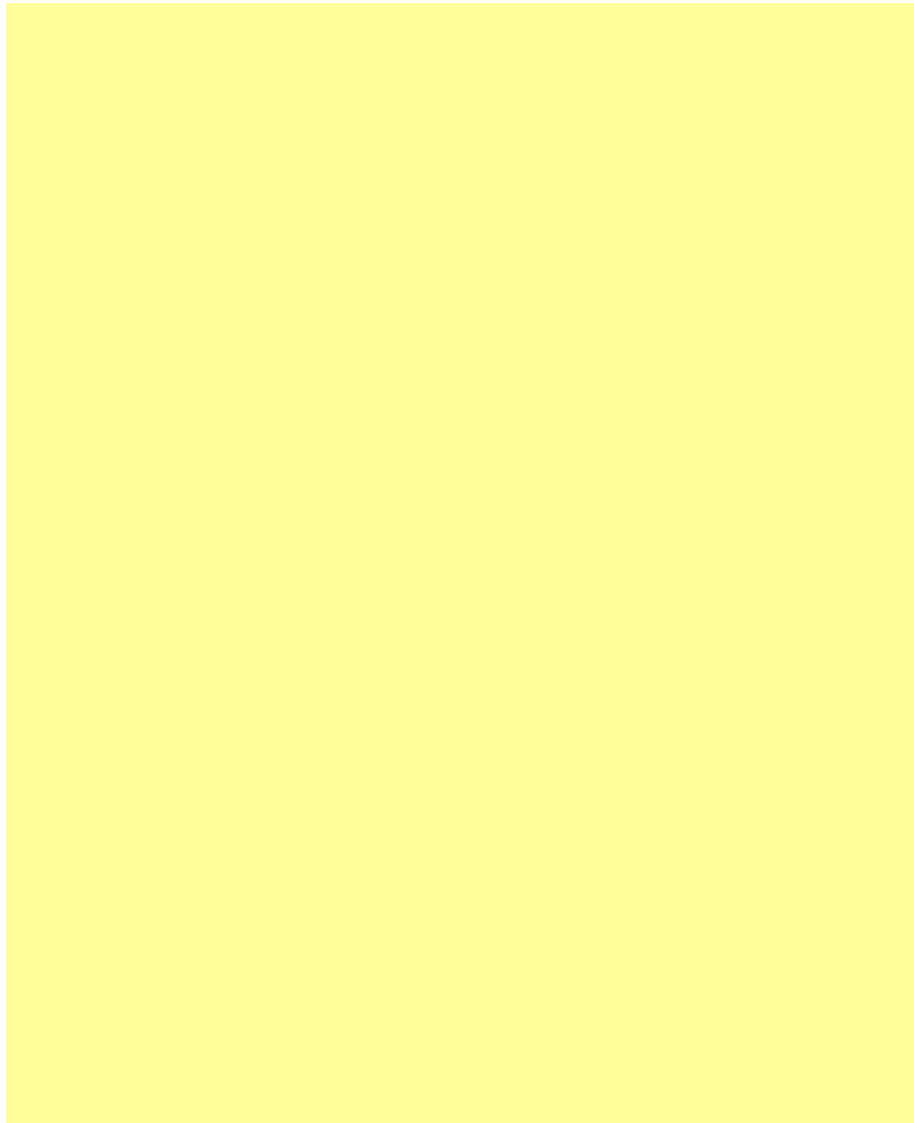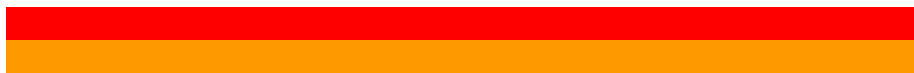

**96032N, N](normali:07028N, N](normali:07020N, N](normali:07993N, N](normalized)**

|           |           |           |           |
|-----------|-----------|-----------|-----------|
| 7.97      | 7.4473476 | 7.599537  | 7.161766  |
| 4.438443  | 3.6711743 | 4.0836406 | 3.0151227 |
| 5.3510427 | 4.2540455 | 3.8401752 | 4.2740088 |
| 10.821028 | 6.277798  | 7.693179  | 6.1979117 |
| 2.9527395 | 4.876491  | 4.4687223 | 5.282406  |
| 2.9527395 | 4.876491  | 4.4687223 | 5.282406  |
| 7.8361297 | 6.625823  | 7.4934654 | 6.8311253 |
| 4.2917852 | 3.4934525 | 4.273472  | 2.8951416 |
| 5.8745117 | 5.5816936 | 5.8076115 | 5.3987575 |
| 7.095615  | 4.6008844 | 5.731102  | 5.0481358 |
| 3.5091064 | 6.469005  | 3.6134408 | 5.502307  |
| 7.344956  | 5.5159173 | 6.906013  | 5.9088225 |
| 7.344956  | 5.5159173 | 6.906013  | 5.9088225 |
| 7.344956  | 5.5159173 | 6.906013  | 5.9088225 |
| 4.002629  | 2.6742423 | 3.9158492 | 2.8013995 |
| 6.8613634 | 7.132372  | 8.043253  | 7.6201086 |
| 6.8613634 | 7.132372  | 8.043253  | 7.6201086 |
| 6.8613634 | 7.132372  | 8.043253  | 7.6201086 |
| 4.7061467 | 4.4840164 | 4.761637  | 3.5822957 |
| 5.7595925 | 3.5931666 | 3.3527057 | 2.671759  |
| 5.890485  | 4.4885716 | 4.594253  | 4.347541  |
| 2.350709  | 3.8679411 | 4.308338  | 2.352752  |
| 4.9771304 | 2.3408759 | 3.247869  | 2.352752  |
| 3.5252707 | 5.152258  | 4.5525107 | 4.512973  |

|                      |                    |                    |                  |           |                  |
|----------------------|--------------------|--------------------|------------------|-----------|------------------|
| ASHGA5P020789        | 0.00167851         | 0.027439569        | 2.7639348        | up        | noncoding        |
| ASHGA5P044770        | 0.00208465         | 0.030144699        | 2.2903466        | up        | noncoding        |
| ASHGA5P045216        | 0.004102171        | 0.040926621        | 2.6104313        | up        | noncoding        |
| ASHGA5P027638        | 0.001203738        | 0.023279887        | 4.6842796        | up        | noncoding        |
| ASHGA5P032023        | 0.049850251        | 0.145360175        | 2.6579183        | up        | noncoding        |
| ASHGA5P044836        | 0.00393204         | 0.040316445        | 2.8560585        | up        | noncoding        |
| ASHGA5P029706        | 0.002155772        | 0.030562731        | 3.1999148        | up        | noncoding        |
| ASHGA5P029706        | 0.002155772        | 0.030562731        | 3.1999148        | up        | noncoding        |
| ASHGA5P035715        | 0.000128767        | 0.010460795        | 2.742712         | up        | noncoding        |
| ASHGA5P035715        | 0.000128767        | 0.010460795        | 2.742712         | up        | noncoding        |
| ASHGA5P035715        | 0.000128767        | 0.010460795        | 2.742712         | up        | noncoding        |
| ASHGA5P016824        | 0.027365906        | 0.103219977        | 3.2415092        | up        | noncoding        |
| ASHGA5P038596        | 0.024930451        | 0.097992075        | 3.5367341        | up        | noncoding        |
| ASHGA5P053097        | 0.001028699        | 0.02179407         | 2.5260713        | up        | noncoding        |
| ASHGA5P042967        | 0.008061411        | 0.056491889        | 6.0861372        | up        | noncoding        |
| ASHGA5P049003        | 0.011697709        | 0.066606252        | 3.2784796        | up        | noncoding        |
| ASHGA5P049003        | 0.011697709        | 0.066606252        | 3.2784796        | up        | noncoding        |
| ASHGA5P048122        | 0.008270553        | 0.056920478        | 2.7510408        | up        | noncoding        |
| ASHGA5P056899        | 0.024566717        | 0.097243838        | 5.5359803        | up        | noncoding        |
| ASHGA5P053487        | 0.006673787        | 0.051928192        | 2.8806486        | up        | noncoding        |
| ASHGA5P046701        | 0.002375545        | 0.031849965        | 2.3502404        | up        | noncoding        |
| ASHGA5P047683        | 0.014887653        | 0.074671223        | 2.4901395        | up        | noncoding        |
| ASHGA5P042961        | 0.000275979        | 0.012375459        | 13.666813        | up        | noncoding        |
| ASHGA5P028575        | 0.013703699        | 0.071739124        | 3.2992187        | up        | noncoding        |
| ASHGA5P018536        | 0.016819376        | 0.078960288        | 31.8043519       | up        | noncoding        |
| ASHGA5P050997        | 0.00020401         | 0.01146874         | 8.8592287        | up        | noncoding        |
| <b>ASHGA5P041934</b> | <b>5.05122E-05</b> | <b>0.007392592</b> | <b>4.3340308</b> | <b>up</b> | <b>noncoding</b> |
| ASHGA5P056162        | 0.013628042        | 0.071680418        | 2.0274044        | up        | noncoding        |
| ASHGA5P050888        | 0.003174736        | 0.036481439        | 2.4979224        | up        | noncoding        |
| ASHGA5P053694        | 0.008772501        | 0.05835635         | 2.7886075        | up        | noncoding        |
| ASHGA5P019742        | 0.005528331        | 0.047315963        | 2.3134817        | up        | noncoding        |
| ASHGA5P037444        | 0.040896403        | 0.129245177        | 2.1581883        | up        | noncoding        |
| ASHGA5P037444        | 0.040896403        | 0.129245177        | 2.1581883        | up        | noncoding        |
| ASHGA5P037444        | 0.040896403        | 0.129245177        | 2.1581883        | up        | noncoding        |
| ASHGA5P037444        | 0.040896403        | 0.129245177        | 2.1581883        | up        | noncoding        |
| ASHGA5P038421        | 0.022859541        | 0.093651074        | 2.0412295        | up        | noncoding        |
| ASHGA5P045335        | 0.000311642        | 0.012874016        | 4.3141789        | up        | noncoding        |
| ASHGA5P036375        | 2.18615E-05        | 0.005043652        | 2.5921713        | up        | noncoding        |
| ASHGA5P042233        | 0.000559579        | 0.016101946        | 8.4451224        | up        | noncoding        |
| ASHGA5P028913        | 0.04915931         | 0.144049178        | 2.2662041        | up        | noncoding        |
| ASHGA5P026827        | 0.020367233        | 0.087543191        | 2.7534815        | up        | noncoding        |
| ASHGA5P026642        | 0.006774947        | 0.052211732        | 3.0251255        | up        | noncoding        |
| ASHGA5P026642        | 0.006774947        | 0.052211732        | 3.0251255        | up        | noncoding        |
| ASHGA5P052151        | 0.003558921        | 0.038481895        | 3.8070484        | up        | noncoding        |
| ASHGA5P044524        | 0.00059047         | 0.016411961        | 21.9687645       | up        | noncoding        |
| ASHGA5P015612        | 0.021127449        | 0.089499513        | 2.3630509        | up        | noncoding        |
| ASHGA5P029373        | 0.007792186        | 0.055480763        | 2.4587446        | up        | noncoding        |
| ASHGA5P049522        | 0.000981435        | 0.021189195        | 4.4297651        | up        | noncoding        |
| ASHGA5P056323        | 0.00405098         | 0.040655911        | 2.2951802        | up        | noncoding        |
| ASHGA5P056323        | 0.00405098         | 0.040655911        | 2.2951802        | up        | noncoding        |
| ASHGA5P056323        | 0.00405098         | 0.040655911        | 2.2951802        | up        | noncoding        |
| ASHGA5P022469        | 0.015705932        | 0.076574828        | 2.2471936        | up        | noncoding        |
| ASHGA5P045076        | 0.000453269        | 0.015001215        | 2.1097113        | up        | noncoding        |
| ASHGA5P032987        | 0.002706646        | 0.033801833        | 2.9635411        | up        | noncoding        |
| ASHGA5P052919        | 0.001850001        | 0.028874356        | 4.4171837        | up        | noncoding        |
| ASHGA5P030886        | 0.005605051        | 0.047487927        | 2.0961711        | up        | noncoding        |
| ASHGA5P030886        | 0.005605051        | 0.047487927        | 2.0961711        | up        | noncoding        |
| ASHGA5P030886        | 0.005605051        | 0.047487927        | 2.0961711        | up        | noncoding        |
| ASHGA5P027402        | 0.005271594        | 0.046214425        | 2.5169958        | up        | noncoding        |
| ASHGA5P027402        | 0.005271594        | 0.046214425        | 2.5169958        | up        | noncoding        |
| ASHGA5P036237        | 0.018322759        | 0.082120309        | 2.0496357        | up        | noncoding        |
| ASHGA5P031281        | 0.00094294         | 0.020844644        | 3.4828476        | up        | noncoding        |

|                        |               |                     |            |             |          |
|------------------------|---------------|---------------------|------------|-------------|----------|
| ENST00000519861        | RP11-383J24.5 | GENCODE             | 359        | chr8        | -        |
| ENST00000563059        | KB-1836B5.1   | GENCODE             | 911        | chr8        | +        |
| ENST00000426946        | RP11-220I1.2  | GENCODE             | 944        | chr9        | -        |
| ENST00000535720        | RP11-173P15.3 | GENCODE             | 583        | chr12       | -        |
| ENST00000419190        | RP11-465N4.4  | GENCODE             | 788        | chr1        | -        |
| TCONS_00002142         | XLOC_000363   | LincRNAs identified | 264        | chr1        | +        |
| ENST00000556926        | RP11-356K23.2 | GENCODE             | 458        | chr14       | +        |
| ENST00000556926        | RP11-356K23.2 | GENCODE             | 458        | chr14       | +        |
| ENST00000414538        | AC092687.5    | GENCODE             | 565        | chr2        | +        |
| ENST00000414538        | AC092687.5    | GENCODE             | 565        | chr2        | +        |
| ENST00000414538        | AC092687.5    | GENCODE             | 565        | chr2        | +        |
| ENST00000434703        | AC005152.2    | GENCODE             | 3032       | chr17       | -        |
| ENST00000421870        | EIF2B5-AS1    | GENCODE             | 571        | chr3        | -        |
| ENST00000419314        | CCT6P3        | GENCODE             | 3702       | chr7        | +        |
| ENST00000446246        | AC004593.3    | GENCODE             | 798        | chr7        | -        |
| ENST00000570072        | RP11-304L19.1 | GENCODE             | 600        | chr16       | +        |
| ENST00000570072        | RP11-304L19.1 | GENCODE             | 600        | chr16       | +        |
| CD642394               |               | LincRNAs identified | 752        | chr3        | -        |
| TCONS_00010362         | XLOC_004859   | LincRNAs identified | 282        | chr5        | -        |
| ENST00000519854        | RP11-37B2.1   | GENCODE             | 284        | chr8        | -        |
| ENST00000455777        | RP13-507I23.1 | GENCODE             | 284        | chrX        | +        |
| uc001kyd.1             | AK094859      | UCSC_knowngene      | 2743       | chr10       | +        |
| ENST00000523608        | RP1-170O19.17 | GENCODE             | 757        | chr7        | -        |
| ENST00000443679        | LINC00345     | GENCODE             | 285        | chr13       | -        |
| ENST00000454712        | RP11-431J24.2 | GENCODE             | 454        | chrX        | -        |
| ENST00000430481        | RP5-881L22.5  | GENCODE             | 370        | chr20       | -        |
| <b>ENST00000431043</b> | <b>SNHG5</b>  | <b>GENCODE</b>      | <b>998</b> | <b>chr6</b> | <b>-</b> |
| TCONS_00027578         | XLOC_013095   | LincRNAs identified | 1145       | chr19       | +        |
| ENST00000444990        | AC093642.5    | GENCODE             | 557        | chr2        | +        |
| ENST00000452436        | AC129778.2    | pseudogene          | 321        | chr9        | -        |
| uc011ckd.2             | NBLA00301     | UCSC_knowngene      | 4252       | chr4        | +        |
| NR_038880              | GCFC1-AS1     | RefSeq              | 2946       | chr21       | +        |
| NR_038880              | GCFC1-AS1     | RefSeq              | 2946       | chr21       | +        |
| NR_038880              | GCFC1-AS1     | RefSeq              | 2946       | chr21       | +        |
| NR_038880              | GCFC1-AS1     | RefSeq              | 2946       | chr21       | +        |
| uc003ene.2             | FAM86HP       | UCSC_knowngene      | 1886       | chr3        | -        |
| ENST00000433644        | RP11-435O5.2  | GENCODE             | 739        | chr9        | -        |
| ENST00000420509        | AC007383.3    | GENCODE             | 752        | chr2        | +        |
| ENST00000454882        | RP3-380B8.4   | GENCODE             | 412        | chr6        | +        |
| ENST00000417102        | CLYBL-IT1     | GENCODE             | 374        | chr13       | +        |
| TCONS_00011825         | XLOC_005311   | LincRNAs identified | 283        | chr6        | +        |
| ENST00000529215        | CTD-2562J17.7 | GENCODE             | 506        | chr11       | +        |
| ENST00000529215        | CTD-2562J17.7 | GENCODE             | 506        | chr11       | +        |
| TCONS_00015168         | XLOC_007214   | LincRNAs identified | 1349       | chr8        | -        |
| uc003ysa.2             | <b>CCAT1</b>  | UCSC_knowngene      | 2613       | chr8        | -        |
| ENST00000421927        | MCM3AP-AS1    | GENCODE             | 2280       | chr21       | +        |
| ENST00000564585        | RP11-982M15.8 | GENCODE             | 3816       | chr14       | -        |
| ENST00000460249        | C17orf76-AS1  | GENCODE             | 773        | chr17       | +        |
| TCONS_00002486         | XLOC_001036   | LincRNAs identified | 875        | chr1        | -        |
| TCONS_00002486         | XLOC_001036   | LincRNAs identified | 875        | chr1        | -        |
| TCONS_00002486         | XLOC_001036   | LincRNAs identified | 875        | chr1        | -        |
| NR_039992              | LINC00645     | RefSeq              | 3555       | chr14       | +        |
| NR_015445              | BREA2         | RefSeq              | 1002       | chr8        | +        |
| TCONS_00029124         | XLOC_014070   | LincRNAs identified | 531        | chr21       | -        |
| uc003qvy.1             | AL832737      | UCSC_knowngene      | 3867       | chr6        | -        |
| ENST00000562485        | RP11-20I23.8  | GENCODE             | 9768       | chr16       | -        |
| ENST00000562485        | RP11-20I23.8  | GENCODE             | 9768       | chr16       | -        |
| ENST00000562485        | RP11-20I23.8  | GENCODE             | 9768       | chr16       | -        |
| ENST00000489520        | RPSAP52       | GENCODE             | 1144       | chr12       | -        |
| ENST00000489520        | RPSAP52       | GENCODE             | 1144       | chr12       | -        |
| TCONS_00026864         | XLOC_012912   | LincRNAs identified | 487        | chr19       | +        |
| ENST00000422207        | <b>GAS5</b>   | <b>GENCODE</b>      | <b>643</b> | <b>chr1</b> | <b>-</b> |

|           |           |                  |                            |                      |
|-----------|-----------|------------------|----------------------------|----------------------|
| 125485048 | 125486595 |                  | CATCTTTGAGCAAAGGAGAGAGGGC  | bidirectional        |
| 37920398  | 37921309  |                  | GCTTACAACCTGATCAGGAGACGAG  | intergenic           |
| 37112914  | 37115487  | ENST00000426358  | GCTGCATTTCAAATTGAACCTTAG   | intergenic           |
| 121136066 | 121137344 |                  | AAATAAGAATCCCACCCCTTTAAC   | natural antisense    |
| 201969221 | 201979481 |                  | AGAGATTCAGCAACAAAGAGGCCT   | intrinsic antisense  |
| 117647168 | 117647504 |                  | TGTCCTCATGAGGCTTAGCATCTAA  | intergenic           |
| 89821403  | 89822915  |                  | ACAATTGTAACCCTGTAAAGCTGAT  | intrinsic antisense  |
| 89821403  | 89822915  |                  | ACAATTGTAACCCTGTAAAGCTGAT  | intrinsic antisense  |
| 10729291  | 10744956  |                  | CAAACATAACTTTAAATCGATCATC  | natural antisense    |
| 10729291  | 10744956  |                  | CAAACATAACTTTAAATCGATCATC  | natural antisense    |
| 10729291  | 10744956  |                  | CAAACATAACTTTAAATCGATCATC  | natural antisense    |
| 70067183  | 70112157  |                  | AGGTAAAGCGCAGCCAAAACAATC   | intergenic           |
| 184264501 | 184274706 |                  | CCAGGGGCCCATGACTGTAGTCACC  | intrinsic antisense  |
| 64498731  | 64535091  |                  | CAGGACTTGTAT/643180        | intergenic           |
| 29239155  | 29248586  |                  | GGACTAGTACTCCTCATCTGAGTAA  | intrinsic antisense  |
| 2141436   | 2145018   |                  | AATGCTTCTGTTTTGCTGTCTCTCG  | natural antisense    |
| 2141436   | 2145018   |                  | AATGCTTCTGTTTTGCTGTCTCTCG  | natural antisense    |
| 163907665 | 163908407 |                  | GTGTTTCACCAATGCTCTTCAGTTA  | intergenic           |
| 67804064  | 67816089  | TCONS_00010945   | TGGAGGAGAGATAAGGAGTTCATA   | intergenic           |
| 90629221  | 90635433  | ENST00000520306  | TTTGAAGAAGGCAAGCTTCATTA    | intergenic           |
| 149129099 | 149131017 |                  | CTCAGCGTTAATTTGTAAGCCTTTG  | intergenic           |
| 106061961 | 106064704 |                  | CCAAGGCCAAGTTAATACTGTGC    | intergenic           |
| 27278861  | 27280847  |                  | TGTTTTCGCTTCTCTTTGGTTAAAA  | intergenic           |
| 53058295  | 53058815  |                  | CATAAACTTATGTTTGCAAAGCACC  | intergenic           |
| 16171342  | 16183244  |                  | GGGAAGAGGAGTTGGATTTGGGAA   | natural antisense    |
| 42979361  | 42980742  |                  | CACCTCTCAGTTCTGAGAGCCGAGG  | natural antisense    |
| 86386845  | 86388451  |                  | CTTTACATATGTTGTAATGTTGTA   | intergenic           |
| 45240861  | 45249208  |                  | ACTTCCAGATGGAATTTTCGTTTCCC | intergenic           |
| 243030829 | 243058523 |                  | CACAAAAGAAGTAAGTATTCTATTA  | intergenic           |
| 42853630  | 42856292  |                  | TTCATTTACCCTTTGGTTCGGAACGG | TGAGTGAGTCACA'       |
| 174451608 | 174462981 | ENST00000514673, | ACTCCAGAAAGA/79804         | bidirectional        |
| 34100424  | 34105224  |                  | AGTACTAGTCAC/100506215     | bidirectional        |
| 34100424  | 34105224  |                  | AGTACTAGTCAC/100506215     | bidirectional        |
| 34100424  | 34105224  |                  | AGTACTAGTCAC/100506215     | bidirectional        |
| 34100424  | 34105224  |                  | AGTACTAGTCAC/100506215     | bidirectional        |
| 129816624 | 129822720 | ENST00000427587, | GGGATGTAGCGA/729375        | natural antisense    |
| 98177780  | 98189078  |                  | TTTCAATAGTCCAGACAGCTTCCAA  | intergenic           |
| 206949328 | 206951288 |                  | TTCCCTCTCCGCCGAGCTGTCCAGA  | natural antisense    |
| 5851738   | 5870453   |                  | GCCCACACATAAGCTGAAGTATTGC  | intergenic           |
| 100426278 | 100427543 |                  | CCTGAGAATGTTTTCTGCCACTCAA  | intron sense-overlap |
| 47824776  | 47838098  |                  | ATGGGAAATGGTGTGGATCAGCAC   | intergenic           |
| 74971170  | 74972069  |                  | TGTGTAAGATGAATTTAACCCCTAG  | natural antisense    |
| 74971170  | 74972069  |                  | TGTGTAAGATGAATTTAACCCCTAG  | natural antisense    |
| 128153590 | 128197980 |                  | TCAGCCTCCCTGGACTGTTACATAA  | intergenic           |
| 128219628 | 128231333 |                  | AGGAAGGCTCGCTAGAATACTTTGT  | intergenic           |
| 47649160  | 47662913  |                  | GAGTGCGAAGCA/114044        | natural antisense    |
| 105127456 | 105131895 |                  | GACAGGAAAACGTAATGTTATAAAC  | intergenic           |
| 16342640  | 16344880  | ENST00000492250  | TTTTCTGAAGAT/125144        | intergenic           |
| 154671124 | 154675050 |                  | TAAAATACTCAAATCCTAGAAGGT   | exon sense-overlappi |
| 154671124 | 154675050 |                  | TAAAATACTCAAATCCTAGAAGGT   | exon sense-overlappi |
| 154671124 | 154675050 |                  | TAAAATACTCAAATCCTAGAAGGT   | exon sense-overlappi |
| 28081793  | 28108842  |                  | AATGTAACAGA/100505967      | intergenic           |
| 144779284 | 144780583 |                  | CTGCAATATTCTI/286076       | intergenic           |
| 38411520  | 38414294  |                  | AATTCAGAGACCATGAAGTGAACT   | intergenic           |
| 168080305 | 168096970 |                  | GATGGACACAGAATCCTGAACTATG  | intergenic           |
| 2604068   | 2616295   |                  | TCTCCATTTTTGGCATAACTAAGGC  | natural antisense    |
| 2604068   | 2616295   |                  | TCTCCATTTTTGGCATAACTAAGGC  | natural antisense    |
| 2604068   | 2616295   |                  | TCTCCATTTTTGGCATAACTAAGGC  | natural antisense    |
| 66151799  | 66220754  |                  | TCTTGACGGAC/204010         | intrinsic antisense  |
| 66151799  | 66220754  |                  | TCTTGACGGAC/204010         | intrinsic antisense  |
| 1261353   | 1262238   |                  | TCAAAGATGGGAGGAAAGCGAGG    | intergenic           |
| 173833041 | 173834044 | ENST00000412059, | GATGGGAGTGAT/60674         | intergenic           |

|                        |        |                           |           |           |
|------------------------|--------|---------------------------|-----------|-----------|
| NM_007218              | RNF139 | E3 ubiquitin-protein +    | 125487007 | 125500859 |
| NM_014730              | MLEC   | malectin precursor +      | 121124948 | 121139667 |
| NM_020216              | RNPEP  | aminopeptidase B +        | 201951765 | 201975275 |
| NM_001085471           | FOXN3  | forkhead box protein -    | 89622515  | 90085494  |
| NM_005197              | FOXN3  | forkhead box protein -    | 89622515  | 89883454  |
| NM_001261392           | NOL10  | nucleolar protein 10 :-   | 10710891  | 10830113  |
| NM_001261394           | NOL10  | nucleolar protein 10 :-   | 10710891  | 10830113  |
| NM_024894              | NOL10  | nucleolar protein 10 :-   | 10710891  | 10830113  |
| ENST00000444495        | EIF2B5 | eukaryotic translatior +  | 183853163 | 184402546 |
| NM_004067              | CHN2   | beta-chimaerin isoform +  | 29234120  | 29553944  |
| NM_000296              | PKD1   | polycystin-1 isoform -    | 2138710   | 2185899   |
| NM_001009944           | PKD1   | polycystin-1 isoform -    | 2138710   | 2185899   |
| NM_005314              | GRPR   | gastrin-releasing pep +   | 16141423  | 16171641  |
| NM_178491              | R3HDML | peptidase inhibitor R +   | 42965625  | 42979875  |
| TTTTCCAAAATCCCTCCCCATT |        |                           |           |           |
| NM_021973              | HAND2  | heart- and neural cre: -  | 174447651 | 174451378 |
| NM_001160302           | SYNJ1  | synaptojanin-1 isoform -  | 34001068  | 34100250  |
| NM_001160306           | SYNJ1  | synaptojanin-1 isoform -  | 34001068  | 34100250  |
| NM_003895              | SYNJ1  | synaptojanin-1 isoform -  | 34001068  | 34100351  |
| NM_203446              | SYNJ1  | synaptojanin-1 isoform -  | 34001068  | 34100351  |
| NM_001136152           | ALG1L2 | putative glycosyltran +   | 129800673 | 129817233 |
| NM_017759              | INO80D | INO80 complex subu -      | 206858444 | 206950906 |
| NM_206808              | CLYBL  | citrate lyase subunit l + | 100258918 | 100549388 |
| NM_004041              | ARRB1  | beta-arrestin-1 isoform - | 74971165  | 75062875  |
| NM_020251              | ARRB1  | beta-arrestin-1 isoform - | 74971165  | 75062875  |
| NM_003906              | MCM3AP | 80 kDa MCM3-assoc -       | 47655047  | 47705236  |
| NM_001204087           | KCNN3  | small conductance ca -    | 154669941 | 154842754 |
| NM_002249              | KCNN3  | small conductance ca -    | 154669941 | 154842754 |
| NM_170782              | KCNN3  | small conductance ca -    | 154669941 | 154832338 |
| NM_001261816           | PDPK1  | 3-phosphoinositide-d +    | 2587964   | 2653191   |
| NM_002613              | PDPK1  | 3-phosphoinositide-d +    | 2587964   | 2653191   |
| NM_031268              | PDPK1  | 3-phosphoinositide-d +    | 2587964   | 2653191   |
| NM_003483              | HMGA2  | high mobility group I +   | 66218239  | 66360071  |
| NM_003484              | HMGA2  | high mobility group I +   | 66218239  | 66309307  |

|                    |                   |                  |                 |                  |                 |
|--------------------|-------------------|------------------|-----------------|------------------|-----------------|
| 1252.796727        | 262.525294        | 9.753727         | 8.287003        | 861.8564         | 628.0028        |
| 150.933928         | 41.148897         | 6.848699         | 5.653134        | 159.3981         | 127.43641       |
| 30.964935          | 7.979785          | 4.597665         | 3.213377        | 46.639114        | 28.424562       |
| 416.558685         | 57.01679          | 8.230183         | 6.002356        | 596.93335        | 552.93634       |
| 289.704707         | 87.133784         | 7.782154         | 6.371857        | 284.63934        | 246.38773       |
| 46.118671          | 12.709844         | 5.122739         | 3.608714        | 39.98905         | 39.37692        |
| 2736.6989          | 489.703955        | 10.90292         | 9.224887        | 2179.9688        | 1128.833        |
| 2736.6989          | 489.703955        | 10.90292         | 9.224887        | 2179.9688        | 1128.833        |
| 84.408864          | 19.545019         | 6.018928         | 4.563325        | 76.840034        | 104.2975        |
| 84.408864          | 19.545019         | 6.018928         | 4.563325        | 76.840034        | 104.2975        |
| 84.408864          | 19.545019         | 6.018928         | 4.563325        | 76.840034        | 104.2975        |
| 87.515493          | 19.869387         | 6.037445         | 4.34078         | 97.546           | 114.12531       |
| 121.851631         | 12.05868          | 5.639105         | 3.816687        | 213.04868        | 365.142         |
| 256.958597         | 67.154073         | 7.629384         | 6.292489        | 251.67517        | 237.67331       |
| 110.247376         | 12.224558         | 6.234939         | 3.629412        | 82.93091         | 113.58381       |
| 5622.429067        | 913.36139         | 11.776481        | 10.063454       | 7117.032         | 11283.5625      |
| 5622.429067        | 913.36139         | 11.776481        | 10.063454       | 7117.032         | 11283.5625      |
| 23.555232          | 6.183385          | 4.139886         | 2.679908        | 38.79897         | 22.817408       |
| 80.580348          | 5.942437          | 5.090341         | 2.621502        | 139.64807        | 14.021721       |
| 193.650589         | 37.209461         | 6.831187         | 5.304794        | 92.968376        | 99.91898        |
| 113.041969         | 31.221171         | 6.398968         | 5.16616         | 94.84593         | 50.225235       |
| 1152.654867        | 340.493157        | 9.775169         | 8.458942        | 1162.0889        | 1139.1597       |
| 2893.344209        | 79.859348         | 8.517815         | 4.74521         | 89.89551         | 116.93899       |
| 47.884782          | 8.07107           | 4.89109          | 3.168965        | 66.752945        | 49.853775       |
| 2244.606106        | 12.242546         | 8.755789         | 3.764637        | 4453.1816        | 105.857124      |
| 169.89079          | 11.285549         | 6.932612         | 3.785431        | 216.05371        | 266.06107       |
| <b>1755.961983</b> | <b>255.308592</b> | <b>10.363214</b> | <b>8.247504</b> | <b>1839.2551</b> | <b>1574.528</b> |
| 30.635803          | 12.054478         | 4.610554         | 3.59092         | 36.145473        | 25.799778       |
| 316.776365         | 73.591512         | 7.806624         | 6.485896        | 270.95404        | 243.57918       |
| 324.694445         | 64.963747         | 7.808699         | 6.329154        | 195.40427        | 177.18216       |
| 168.365298         | 51.082545         | 7.024097         | 5.814031        | 174.82643        | 154.99406       |
| 114.495731         | 28.919695         | 6.2543           | 5.14448         | 152.0358         | 32.890064       |
| 114.495731         | 28.919695         | 6.2543           | 5.14448         | 152.0358         | 32.890064       |
| 114.495731         | 28.919695         | 6.2543           | 5.14448         | 152.0358         | 32.890064       |
| 114.495731         | 28.919695         | 6.2543           | 5.14448         | 152.0358         | 32.890064       |
| 970.860557         | 328.350646        | 9.48662          | 8.457181        | 1051.5289        | 1116.6976       |
| 64.509825          | 9.312461          | 5.563767         | 3.454681        | 72.02557         | 94.993256       |
| 19.97982           | 5.590855          | 3.986813         | 2.612652        | 21.155407        | 18.285019       |
| 427.467372         | 28.74874          | 8.183641         | 5.105523        | 567.73303        | 374.55658       |
| 28.628572          | 13.497291         | 4.404381         | 3.224103        | 32.47304         | 19.244263       |
| 33.708019          | 9.711667          | 4.719659         | 3.258402        | 39.18232         | 44.36817        |
| 2938.775267        | 695.900737        | 11.077279        | 9.480284        | 3295.9956        | 3822.5562       |
| 2938.775267        | 695.900737        | 11.077279        | 9.480284        | 3295.9956        | 3822.5562       |
| 202.400201         | 31.338249         | 7.13503          | 5.206357        | 166.04391        | 202.39459       |
| 4016.349183        | 131.431215        | 11.471286        | 7.013904        | 5166.988         | 5681.437        |
| 27.64921           | 8.507625          | 4.431145         | 3.190495        | 26.978218        | 41.515892       |
| 64.882303          | 16.608411         | 5.596261         | 4.298339        | 57.737877        | 47.594387       |
| 388.77416          | 52.692212         | 8.124631         | 5.977401        | 481.05786        | 698.84406       |
| 468.613823         | 137.474601        | 8.458878         | 7.26027         | 564.4654         | 500.70444       |
| 468.613823         | 137.474601        | 8.458878         | 7.26027         | 564.4654         | 500.70444       |
| 468.613823         | 137.474601        | 8.458878         | 7.26027         | 564.4654         | 500.70444       |
| 22.135826          | 7.790851          | 4.121544         | 2.95342         | 28.64463         | 22.236095       |
| 268.330752         | 78.971117         | 7.690023         | 6.612977        | 256.9652         | 302.4342        |
| 35.072775          | 7.84852           | 4.70434          | 3.137018        | 31.828264        | 17.82773        |
| 49.76435           | 8.437647          | 5.210027         | 3.066901        | 34.06683         | 20.077078       |
| 63.844793          | 20.357945         | 5.55712          | 4.489363        | 78.43266         | 75.74527        |
| 63.844793          | 20.357945         | 5.55712          | 4.489363        | 78.43266         | 75.74527        |
| 63.844793          | 20.357945         | 5.55712          | 4.489363        | 78.43266         | 75.74527        |
| 278.457837         | 64.220164         | 7.658888         | 6.327186        | 292.8634         | 131.23592       |
| 278.457837         | 64.220164         | 7.658888         | 6.327186        | 292.8634         | 131.23592       |
| 71.24371           | 21.744371         | 5.735521         | 4.700153        | 79.87659         | 115.9175        |
| 10086.76757        | 1631.226683       | 12.829926        | 11.029658       | 9223.982         | 7960.182        |

|                  |                  |                 |                  |                  |                   |
|------------------|------------------|-----------------|------------------|------------------|-------------------|
| 971.829          | 2321.5935        | 958.11536       | 1775.3833        | 234.64746        | 95.335815         |
| 185.13202        | 93.57077         | 177.7822        | 162.28407        | 29.249651        | 45.067474         |
| 35.686764        | 28.95411         | 24.807653       | 21.277409        | 8.059631         | 7.113857          |
| 527.67773        | 314.2007         | 229.96259       | 277.6414         | 55.62727         | 21.35382          |
| 318.66547        | 396.3472         | 187.2161        | 304.9724         | 66.58109         | 18.004858         |
| 38.26995         | 28.982182        | 68.20511        | 61.888813        | 8.257802         | 4.9999995         |
| 2531.6353        | 3360.7314        | 2842.4204       | 4376.6045        | 528.8294         | 292.76566         |
| 2531.6353        | 3360.7314        | 2842.4204       | 4376.6045        | 528.8294         | 292.76566         |
| 70.30065         | 58.492767        | 98.02491        | 98.49732         | 19.217611        | 17.47701          |
| 70.30065         | 58.492767        | 98.02491        | 98.49732         | 19.217611        | 17.47701          |
| 70.30065         | 58.492767        | 98.02491        | 98.49732         | 19.217611        | 17.47701          |
| 52.881264        | 113.4631         | 50.807274       | 96.27001         | 6.220891         | 11.866141         |
| 25.196224        | 11.966658        | 63.16222        | 52.594006        | 13.993921        | 18.052893         |
| 227.0514         | 205.91647        | 308.0949        | 311.34033        | 65.51407         | 37.77775          |
| 36.007156        | 208.19832        | 70.08443        | 150.67963        | 16.132147        | 9.480113          |
| 1393.2355        | 4482.05          | 4288.5767       | 5170.1177        | 669.89166        | 512.4419          |
| 1393.2355        | 4482.05          | 4288.5767       | 5170.1177        | 669.89166        | 512.4419          |
| 30.56769         | 17.301245        | 10.994911       | 20.851168        | 4.9999995        | 4.9999995         |
| 263.31268        | 21.962345        | 18.468557       | 26.068714        | 4.9999995        | 4.9999995         |
| 83.45571         | 506.9604         | 75.36392        | 303.23615        | 28.126629        | 33.324963         |
| 105.895195       | 139.77751        | 119.253334      | 168.25461        | 34.179127        | 13.674662         |
| 1140.644         | 1126.2333        | 1062.7208       | 1285.0825        | 363.91476        | 72.05472          |
| 33.812572        | 10629.885        | 509.65518       | 5979.878         | 6.43878          | 6.3414607         |
| 92.83226         | 4.9999995        | 43.628654       | 29.241058        | 10.57146         | 9.259715          |
| 8223.55          | 89.92107         | 331.7198        | 263.40704        | 8.40451          | 13.903118         |
| 152.961          | 194.32687        | 67.11926        | 122.82283        | 9.54514          | 11.766289         |
| <b>1998.2858</b> | <b>1885.6049</b> | <b>1305.323</b> | <b>1932.7751</b> | <b>239.04916</b> | <b>119.361694</b> |
| 37.07647         | 32.05904         | 22.75026        | 29.983799        | 11.51545         | 4.9999995         |
| 250.11699        | 548.3152         | 139.38113       | 448.31165        | 67.53691         | 35.959774         |
| 193.72708        | 279.10226        | 532.0155        | 570.7354         | 55.113293        | 63.560345         |
| 174.16595        | 118.94802        | 188.50255       | 198.75478        | 47.958557        | 20.517653         |
| 236.97214        | 65.194725        | 93.99248        | 105.889175       | 25.944609        | 24.9272           |
| 236.97214        | 65.194725        | 93.99248        | 105.889175       | 25.944609        | 24.9272           |
| 236.97214        | 65.194725        | 93.99248        | 105.889175       | 25.944609        | 24.9272           |
| 236.97214        | 65.194725        | 93.99248        | 105.889175       | 25.944609        | 24.9272           |
| 795.61584        | 570.0902         | 1255.1499       | 1036.0809        | 282.84735        | 119.078575        |
| 40.263344        | 33.72821         | 71.28912        | 74.75945         | 10.446461        | 11.8515415        |
| 18.97806         | 31.160698        | 15.010378       | 15.28936         | 4.9999995        | 5.250387          |
| 730.26373        | 456.84735        | 127.654274      | 307.74927        | 23.125238        | 31.758312         |
| 43.167435        | 42.431366        | 10.95874        | 23.49659         | 18.809702        | 4.9999995         |
| 32.911682        | 37.840893        | 21.636522       | 26.308529        | 9.208185         | 4.9999995         |
| 2506.1365        | 1955.8143        | 3331.292        | 2720.857         | 737.06793        | 245.54492         |
| 2506.1365        | 1955.8143        | 3331.292        | 2720.857         | 737.06793        | 245.54492         |
| 116.80039        | 88.813774        | 365.98608       | 274.36246        | 40.178585        | 47.292843         |
| 4095.8293        | 1999.1709        | 3501.1543       | 3653.5156        | 183.53401        | 305.80127         |
| 19.733019        | 28.989588        | 23.16328        | 25.515266        | 11.149279        | 4.9999995         |
| 59.115604        | 116.60001        | 33.847458       | 74.39848         | 15.172           | 9.082616          |
| 258.1584         | 296.74118        | 254.37856       | 343.4649         | 49.079567        | 34.978073         |
| 460.67508        | 578.07764        | 296.18854       | 411.57184        | 156.61925        | 57.531384         |
| 460.67508        | 578.07764        | 296.18854       | 411.57184        | 156.61925        | 57.531384         |
| 460.67508        | 578.07764        | 296.18854       | 411.57184        | 156.61925        | 57.531384         |
| 17.508371        | 30.374304        | 13.653338       | 20.39822         | 4.9999995        | 4.9999995         |
| 209.89352        | 316.43933        | 220.27896       | 303.9733         | 76.445015        | 54.983242         |
| 46.419           | 21.333427        | 50.40979        | 42.61844         | 9.047537         | 7.2090716         |
| 56.130714        | 60.335476        | 62.49464        | 65.48136         | 10.664081        | 4.9999995         |
| 91.108055        | 29.157742        | 56.89219        | 51.732838        | 19.235474        | 9.651351          |
| 91.108055        | 29.157742        | 56.89219        | 51.732838        | 19.235474        | 9.651351          |
| 91.108055        | 29.157742        | 56.89219        | 51.732838        | 19.235474        | 9.651351          |
| 392.5064         | 179.1634         | 326.37994       | 348.59796        | 56.57129         | 51.176537         |
| 392.5064         | 179.1634         | 326.37994       | 348.59796        | 56.57129         | 51.176537         |
| 51.297977        | 45.946953        | 65.67704        | 68.7462          | 15.78692         | 16.243258         |
| 9779.11          | 14155.442        | 6946.5234       | 12455.366        | 1249.8411        | 1167.5133         |

|                 |                  |                 |                  |                  |                  |
|-----------------|------------------|-----------------|------------------|------------------|------------------|
| 378.38202       | 241.81427        | 365.8475        | 259.1247         | 9.289892         | 8.977501         |
| 46.88204        | 34.513958        | 56.992275       | 34.187984        | 6.857848         | 6.764355         |
| 4.9999995       | 12.718191        | 8.527787        | 6.459244         | 5.086096         | 4.7713084        |
| 106.36039       | 43.728916        | 67.745834       | 47.28451         | 8.747626         | 8.801858         |
| 131.83757       | 29.032957        | 164.14182       | 113.20441        | 7.695909         | 7.679269         |
| 19.988197       | 6.128808         | 23.426125       | 13.45813         | 4.8611603        | 5.196118         |
| 857.9394        | 531.4233         | 316.53287       | 410.7331         | 10.614377        | 9.791146         |
| 857.9394        | 531.4233         | 316.53287       | 410.7331         | 10.614377        | 9.791146         |
| 23.442646       | 13.401679        | 17.61738        | 26.113789        | 5.8094444        | 6.49028          |
| 23.442646       | 13.401679        | 17.61738        | 26.113789        | 5.8094444        | 6.49028          |
| 23.442646       | 13.401679        | 17.61738        | 26.113789        | 5.8094444        | 6.49028          |
| 30.970837       | 10.846929        | 36.01606        | 23.295467        | 6.159145         | 6.613652         |
| 13.00847        | 8.62468          | 11.676869       | 6.995246         | 7.285737         | 8.2166           |
| 118.80669       | 66.06052         | 75.90135        | 38.864056        | 7.518346         | 7.630635         |
| 26.413712       | 9.002286         | 4.9999995       | 7.319089         | 5.922473         | 6.606063         |
| 686.04443       | 581.71735        | 2029.8358       | 1000.2372        | 12.312792        | 13.010322        |
| 686.04443       | 581.71735        | 2029.8358       | 1000.2372        | 12.312792        | 13.010322        |
| 8.353088        | 4.9999995        | 8.747227        | 4.9999995        | 4.814247         | 4.4714456        |
| 4.9999995       | 9.357974         | 4.9999995       | 6.2966475        | 6.6725907        | 3.8417947        |
| 8.944802        | 82.62437         | 28.585585       | 41.650417        | 6.0912414        | 6.429155         |
| 44.737114       | 22.19475         | 42.834194       | 29.70718         | 6.1217422        | 5.5164785        |
| 689.75134       | 183.80014        | 477.22638       | 256.2116         | 9.706196         | 9.802824         |
| 4.9999995       | 319.2478         | 9.341758        | 132.78629        | 6.036092         | 6.6469007        |
| 5.810785        | 4.9999995        | 12.78446        | 4.9999995        | 5.601547         | 5.5054727        |
| 4.9999995       | 12.53985         | 21.718386       | 11.88941         | 11.635123        | 6.5086913        |
| 9.691657        | 10.899209        | 13.736268       | 12.07473         | 7.3039308        | 7.791562         |
| <b>433.5139</b> | <b>196.67534</b> | <b>335.2143</b> | <b>208.03716</b> | <b>10.365895</b> | <b>10.231895</b> |
| 25.192402       | 10.28695         | 11.48306        | 8.849005         | 4.7122507        | 4.6408205        |
| 84.52888        | 91.19934         | 88.56417        | 73.76            | 7.623695         | 7.661812         |
| 47.561317       | 104.45039        | 64.85993        | 54.237206        | 7.161021         | 7.2278786        |
| 109.316         | 54.34469         | 38.80315        | 35.555218        | 6.996277         | 7.039657         |
| 40.0551         | 31.10068         | 29.27591        | 22.214668        | 6.7922           | 4.9628887        |
| 40.0551         | 31.10068         | 29.27591        | 22.214668        | 6.7922           | 4.9628887        |
| 40.0551         | 31.10068         | 29.27591        | 22.214668        | 6.7922           | 4.9628887        |
| 40.0551         | 31.10068         | 29.27591        | 22.214668        | 6.7922           | 4.9628887        |
| 808.1593        | 199.49414        | 344.09665       | 216.42786        | 9.565301         | 9.775599         |
| 4.9999995       | 10.988438        | 7.9824924       | 9.605833         | 5.710286         | 6.356907         |
| 4.9999995       | 8.294748         | 4.9999995       | 4.9999995        | 3.9436824        | 4.1855907        |
| 23.505817       | 50.150192        | 22.244946       | 21.707937        | 8.671812         | 8.256527         |
| 42.174046       | 4.9999995        | 4.9999995       | 4.9999995        | 4.560942         | 4.2503815        |
| 17.422232       | 4.9999995        | 14.8093195      | 6.8302665        | 4.8295135        | 5.354347         |
| 1902.2445       | 429.97327        | 502.7358        | 357.838          | 11.205994        | 11.487032        |
| 1902.2445       | 429.97327        | 502.7358        | 357.838          | 11.205994        | 11.487032        |
| 29.58647        | 22.9609          | 30.536951       | 17.473742        | 6.9186983        | 7.409607         |
| 32.195744       | 133.66492        | 49.778625       | 83.612724        | 11.842582        | 12.013407        |
| 13.18505        | 6.7592854        | 8.019631        | 6.9325047        | 4.2987247        | 5.2664766        |
| 18.896067       | 15.086981        | 22.58691        | 18.825891        | 5.39022          | 5.445795         |
| 54.836437       | 34.411884        | 86.11454        | 56.73277         | 8.431667         | 9.125894         |
| 289.1936        | 114.13418        | 126.37401       | 80.99518         | 8.661674         | 8.657427         |
| 289.1936        | 114.13418        | 126.37401       | 80.99518         | 8.661674         | 8.657427         |
| 289.1936        | 114.13418        | 126.37401       | 80.99518         | 8.661674         | 8.657427         |
| 13.171728       | 10.412422        | 4.9999995       | 8.160959         | 4.387575         | 4.438697         |
| 90.11311        | 77.36656         | 109.185684      | 65.73309         | 7.547325         | 7.969258         |
| 8.64123         | 4.9999995        | 12.19328        | 4.9999995        | 4.533784         | 4.15385          |
| 7.603711        | 5.181579         | 17.17651        | 4.9999995        | 4.6282687        | 4.304326         |
| 38.6149         | 14.789759        | 25.807999       | 14.048188        | 5.839066         | 6.0556455        |
| 38.6149         | 14.789759        | 25.807999       | 14.048188        | 5.839066         | 6.0556455        |
| 38.6149         | 14.789759        | 25.807999       | 14.048188        | 5.839066         | 6.0556455        |
| 84.18552        | 73.78892         | 65.73061        | 53.868107        | 7.739571         | 6.8024464        |
| 84.18552        | 73.78892         | 65.73061        | 53.868107        | 7.739571         | 6.8024464        |
| 13.391112       | 28.575354        | 26.859716       | 29.609869        | 5.867154         | 6.6345744        |
| 1237.8507       | 1819.9514        | 2463.3796       | 1848.824         | 12.686368        | 12.506136        |



|                  |                  |                  |                  |                 |                 |
|------------------|------------------|------------------|------------------|-----------------|-----------------|
| 9.553047         | 10.847548        | 9.652062         | 10.2023115       | 8.127777        | 7.431106        |
| 7.211899         | 6.1961746        | 7.2457833        | 6.816137         | 5.1000314       | 6.340822        |
| 4.8407536        | 4.3960357        | 4.519867         | 3.9719284        | 3.2127426       | 3.5922976       |
| 8.688299         | 7.973553         | 7.5989847        | 7.5707755        | 6.0354953       | 5.2479434       |
| 7.980965         | 8.313351         | 7.3146706        | 7.708761         | 6.2935014       | 4.990901        |
| 4.9453607        | 4.3975544        | 5.8923397        | 5.4439034        | 3.2519693       | 2.4279919       |
| 10.957084        | 11.374494        | 11.187539        | 11.492882        | 9.32295         | 9.056586        |
| 10.957084        | 11.374494        | 11.187539        | 11.492882        | 9.32295         | 9.056586        |
| 5.8233075        | 5.489619         | 6.3996673        | 6.1012526        | 4.5017676       | 4.9488564       |
| 5.8233075        | 5.489619         | 6.3996673        | 6.1012526        | 4.5017676       | 4.9488564       |
| 5.8233075        | 5.489619         | 6.3996673        | 6.1012526        | 4.5017676       | 4.9488564       |
| 5.4061484        | 6.4877257        | 5.4888678        | 6.0691323        | 2.837554        | 4.3593707       |
| 4.3429213        | 2.973595         | 5.788062         | 5.227714         | 4.032938        | 4.99504         |
| 7.5030527        | 7.371356         | 8.019993         | 7.732921         | 6.2712216       | 6.0823936       |
| 4.8544374        | 7.3872867        | 5.930689         | 6.7086825        | 4.244479        | 4.0217915       |
| 10.074331        | 11.782421        | 11.764259        | 11.714763        | 9.673226        | 9.866077        |
| 10.074331        | 11.782421        | 11.764259        | 11.714763        | 9.673226        | 9.866077        |
| 4.626699         | 3.5683482        | 3.4124196        | 3.946155         | 2.3467326       | 2.4279919       |
| 7.7092113        | 3.9568033        | 4.114166         | 4.2474794        | 2.3467326       | 2.4279919       |
| 6.0656867        | 8.670306         | 6.030626         | 7.7001095        | 5.0491295       | 5.8961296       |
| 6.408125         | 6.8006306        | 6.675176         | 6.8716574        | 5.326611        | 4.576132        |
| 9.782292         | 9.813189         | 9.798503         | 9.748009         | 8.77046         | 7.0156975       |
| 4.7650294        | 13.0087          | 8.737953         | 11.912215        | 2.8840306       | 3.4165633       |
| 6.214041         | 2.3221264        | 5.2877893        | 4.4155617        | 3.6284132       | 3.987037        |
| 12.6373005       | 6.1379814        | 8.119947         | 7.4956903        | 3.280585        | 4.605299        |
| 6.9265094        | 7.283399         | 5.8689103        | 6.4213634        | 3.473377        | 4.3487344       |
| <b>10.606932</b> | <b>10.558912</b> | <b>10.080638</b> | <b>10.335009</b> | <b>8.152884</b> | <b>7.747083</b> |
| 4.896984         | 4.558445         | 4.399888         | 4.4549365        | 3.753536        | 2.4279919       |
| 7.6343865        | 8.777067         | 6.902346         | 8.240439         | 6.3137927       | 6.014154        |
| 7.28013          | 7.807702         | 8.802414         | 8.5730505        | 6.021134        | 6.847015        |
| 7.1137023        | 6.5618067        | 7.324194         | 7.1089425        | 5.8165784       | 5.1892786       |
| 7.565162         | 5.6542716        | 6.3439355        | 6.2073436        | 4.9392123       | 5.469978        |
| 7.565162         | 5.6542716        | 6.3439355        | 6.2073436        | 4.9392123       | 5.469978        |
| 7.565162         | 5.6542716        | 6.3439355        | 6.2073436        | 4.9392123       | 5.469978        |
| 7.565162         | 5.6542716        | 6.3439355        | 6.2073436        | 4.9392123       | 5.469978        |
| 9.286069         | 8.835735         | 10.022337        | 9.434678         | 8.403776        | 7.7437453       |
| 5.015009         | 4.634572         | 5.9524164        | 5.7134132        | 3.612193        | 4.3572674       |
| 3.9265957        | 4.5179296        | 3.8354495        | 3.5116293        | 2.3467326       | 3.1219954       |
| 9.159653         | 8.52151          | 6.7729           | 7.719443         | 4.7729096       | 5.825639        |
| 5.1083484        | 4.994153         | 3.4077873        | 4.104673         | 4.467273        | 2.4279919       |
| 4.728513         | 4.813502         | 4.331605         | 4.2604713        | 3.4162364       | 2.4279919       |
| 10.946661        | 10.606144        | 11.407322        | 10.810523        | 9.828565        | 8.792931        |
| 10.946661        | 10.606144        | 11.407322        | 10.810523        | 9.828565        | 8.792931        |
| 6.549296         | 6.1198745        | 8.260652         | 7.552053         | 5.563854        | 6.412642        |
| 11.64623         | 10.633326        | 11.46652         | 11.225648        | 7.768665        | 9.117244        |
| 3.9817667        | 4.3981028        | 4.4240303        | 4.2177706        | 3.7086937       | 2.4279919       |
| 5.5727687        | 6.5321217        | 4.9315906        | 5.70507          | 4.1588993       | 3.9583216       |
| 7.6788616        | 7.89756          | 7.7494173        | 7.864388         | 5.8500137       | 5.971114        |
| 8.495224         | 8.855517         | 7.9683747        | 8.11505          | 7.5343547       | 6.6984277       |
| 8.495224         | 8.855517         | 7.9683747        | 8.11505          | 7.5343547       | 6.6984277       |
| 8.495224         | 8.855517         | 7.9683747        | 8.11505          | 7.5343547       | 6.6984277       |
| 3.8092117        | 4.4760723        | 3.7015316        | 3.916177         | 2.3467326       | 2.4279919       |
| 7.397959         | 7.983368         | 7.5375977        | 7.7046285        | 6.4802055       | 6.632056        |
| 5.215388         | 3.908677         | 5.47989          | 4.93445          | 3.3929594       | 3.6124694       |
| 5.495415         | 5.5366125        | 5.7727785        | 5.5227637        | 3.6408224       | 2.4279919       |
| 6.1921954        | 4.4081416        | 5.64297          | 5.204701         | 4.503066        | 4.0511146       |
| 6.1921954        | 4.4081416        | 5.64297          | 5.204701         | 4.503066        | 4.0511146       |
| 6.1921954        | 4.4081416        | 5.64297          | 5.204701         | 4.503066        | 4.0511146       |
| 8.2645235        | 7.161613         | 8.100489         | 7.884687         | 6.058771        | 6.5258894       |
| 8.2645235        | 7.161613         | 8.100489         | 7.884687         | 6.058771        | 6.5258894       |
| 5.3637314        | 5.1170425        | 5.8397994        | 5.590824         | 4.211194        | 4.839772        |
| 12.930331        | 13.453012        | 12.442215        | 12.961493        | 10.586285       | 11.067009       |

|                 |                |                  |                 |
|-----------------|----------------|------------------|-----------------|
| 8.514635        | 8.340542       | 8.752054         | 8.555906        |
| 5.5498486       | 5.3328195      | 6.098575         | 5.4967046       |
| 2.350709        | 3.7853856      | 3.385948         | 2.953177        |
| 6.6984277       | 5.69662        | 6.348827         | 5.9868197       |
| 6.998948        | 5.067354       | 7.590277         | 7.2901635       |
| 4.365098        | 2.720789       | 4.823522         | 4.062913        |
| 9.687518        | 9.512049       | 8.548897         | 9.221321        |
| 9.687518        | 9.512049       | 8.548897         | 9.221321        |
| 4.5808525       | 3.8667085      | 4.412364         | 5.069403        |
| 4.5808525       | 3.8667085      | 4.412364         | 5.069403        |
| 4.5808525       | 3.8667085      | 4.412364         | 5.069403        |
| 4.9682894       | 3.5465562      | 5.445795         | 4.887112        |
| 3.7794375       | 3.2048185      | 3.8201752        | 3.0677135       |
| 6.8519626       | 6.350757       | 6.5072217        | 5.691375        |
| 4.745681        | 3.2656574      | 2.3618152        | 3.1370463       |
| 9.366946        | 9.649572       | 11.2515955       | 10.57331        |
| 9.366946        | 9.649572       | 11.2515955       | 10.57331        |
| 3.1921983       | 2.3408759      | 3.4188986        | 2.352752        |
| 2.350709        | 3.324197       | 2.3618152        | 2.9175668       |
| 3.280585        | 6.6954885      | 5.113602         | 5.793828        |
| 5.4796605       | 4.6418257      | 5.6926494        | 5.280081        |
| 9.376487        | 7.912108       | 9.1374           | 8.541501        |
| 2.350709        | 8.767781       | 3.509996         | 7.5421805       |
| 2.7522485       | 2.3408759      | 3.952465         | 2.352752        |
| 2.350709        | 3.7653742      | 4.7130036        | 3.872849        |
| 3.3890648       | 3.5546107      | 4.0515842        | 3.8952172       |
| <b>8.715908</b> | <b>8.01892</b> | <b>8.6244755</b> | <b>8.225754</b> |
| 4.67796         | 3.4654038      | 3.7958965        | 3.4247332       |
| 6.36874         | 6.8419237      | 6.722024         | 6.654739        |
| 5.57109         | 7.054309       | 6.2873197        | 6.194059        |
| 6.7363176       | 6.04195        | 5.5462823        | 5.5537786       |
| 5.321369        | 5.1697507      | 5.149868         | 4.816699        |
| 5.321369        | 5.1697507      | 5.149868         | 4.816699        |
| 5.321369        | 5.1697507      | 5.149868         | 4.816699        |
| 5.321369        | 5.1697507      | 5.149868         | 4.816699        |
| 9.6058235       | 8.041357       | 8.660897         | 8.28749         |
| 2.350709        | 3.5682375      | 3.2902184        | 3.5494623       |
| 2.350709        | 3.1419067      | 2.3618152        | 2.352752        |
| 4.5842423       | 5.919529       | 4.7470345        | 4.7837806       |
| 5.3939104       | 2.3408759      | 2.3618152        | 2.352752        |
| 4.1748376       | 2.3408759      | 4.1608634        | 3.0296052       |
| 10.831475       | 9.19941        | 9.207486         | 9.021839        |
| 10.831475       | 9.19941        | 9.207486         | 9.021839        |
| 4.9061356       | 4.6980534      | 5.2080727        | 4.4493856       |
| 5.021933        | 7.429501       | 5.911343         | 6.834736        |
| 3.7980187       | 2.857306       | 3.2973657        | 3.0535913       |
| 4.2881074       | 4.0541277      | 4.7693167        | 4.561262        |
| 5.767784        | 5.326723       | 6.682615         | 6.266157        |
| 8.123905        | 7.1851745      | 7.2259994        | 6.793761        |
| 8.123905        | 7.1851745      | 7.2259994        | 6.793761        |
| 8.123905        | 7.1851745      | 7.2259994        | 6.793761        |
| 3.7969644       | 3.4840775      | 2.3618152        | 3.3029366       |
| 6.4606647       | 6.5964704      | 7.026403         | 6.482063        |
| 3.2374547       | 2.3408759      | 3.8855953        | 2.352752        |
| 3.0686224       | 2.5365648      | 4.37465          | 2.352752        |
| 5.275046        | 4.0225964      | 4.9588814        | 4.1254764       |
| 5.275046        | 4.0225964      | 4.9588814        | 4.1254764       |
| 5.275046        | 4.0225964      | 4.9588814        | 4.1254764       |
| 6.3618455       | 6.525436       | 6.306364         | 6.1848073       |
| 6.3618455       | 6.525436       | 6.306364         | 6.1848073       |
| 3.8166988       | 5.0429378      | 5.016523         | 5.273795        |
| 10.216973       | 11.335681      | 11.518818        | 11.453185       |

|                      |                    |                    |                  |           |                  |
|----------------------|--------------------|--------------------|------------------|-----------|------------------|
| ASHGA5P046133        | 0.008990825        | 0.05919444         | 11.7718565       | up        | noncoding        |
| ASHGA5P029325        | 0.002797269        | 0.034179323        | 2.0786741        | up        | noncoding        |
| ASHGA5P055104        | 0.029429593        | 0.107331823        | 2.4708344        | up        | noncoding        |
| ASHGA5P050598        | 0.01306539         | 0.069928519        | 2.0562954        | up        | noncoding        |
| ASHGA5P033854        | 0.00755719         | 0.054639687        | 2.3729655        | up        | noncoding        |
| ASHGA5P021723        | 0.000398132        | 0.014223693        | 2.7579139        | up        | noncoding        |
| ASHGA5P039775        | 0.000541156        | 0.015984419        | 7.0899433        | up        | noncoding        |
| ASHGA5P015696        | 0.034654006        | 0.117788629        | 2.6271273        | up        | noncoding        |
| ASHGA5P015696        | 0.034654006        | 0.117788629        | 2.6271273        | up        | noncoding        |
| ASHGA5P033709        | 0.013799809        | 0.07198363         | 2.2973529        | up        | noncoding        |
| ASHGA5P033709        | 0.013799809        | 0.07198363         | 2.2973529        | up        | noncoding        |
| ASHGA5P033709        | 0.013799809        | 0.07198363         | 2.2973529        | up        | noncoding        |
| ASHGA5P033709        | 0.013799809        | 0.07198363         | 2.2973529        | up        | noncoding        |
| ASHGA5P033709        | 0.013799809        | 0.07198363         | 2.2973529        | up        | noncoding        |
| ASHGA5P033709        | 0.013799809        | 0.07198363         | 2.2973529        | up        | noncoding        |
| ASHGA5P033709        | 0.013799809        | 0.07198363         | 2.2973529        | up        | noncoding        |
| ASHGA5P033709        | 0.013799809        | 0.07198363         | 2.2973529        | up        | noncoding        |
| ASHGA5P033709        | 0.013799809        | 0.07198363         | 2.2973529        | up        | noncoding        |
| ASHGA5P027910        | 0.000966602        | 0.021093715        | 2.5212881        | up        | noncoding        |
| ASHGA5P015290        | 0.013102828        | 0.070034815        | 2.7472528        | up        | noncoding        |
| ASHGA5P000495        | 0.007206028        | 0.053475878        | 3.0629955        | up        | noncoding        |
| ASHGA5P015671        | 0.006916746        | 0.05278746         | 24.8156757       | up        | noncoding        |
| ASHGA5P054912        | 5.46488E-07        | 0.001647562        | 3.1559354        | up        | noncoding        |
| ASHGA5P054912        | 5.46488E-07        | 0.001647562        | 3.1559354        | up        | noncoding        |
| ASHGA5P054912        | 5.46488E-07        | 0.001647562        | 3.1559354        | up        | noncoding        |
| ASHGA5P055706        | 0.000288681        | 0.012492602        | 3.8466476        | up        | noncoding        |
| ASHGA5P025952        | 0.00440548         | 0.04209439         | 2.1195039        | up        | noncoding        |
| ASHGA5P019729        | 0.027814619        | 0.104253625        | 3.8454599        | up        | noncoding        |
| ASHGA5P047429        | 0.0371552          | 0.12233581         | 2.2516338        | up        | noncoding        |
| ASHGA5P047429        | 0.0371552          | 0.12233581         | 2.2516338        | up        | noncoding        |
| ASHGA5P022588        | 0.000623162        | 0.016906436        | 3.8974371        | up        | noncoding        |
| <b>ASHGA5P053562</b> | <b>0.000557797</b> | <b>0.016097331</b> | <b>3.0426166</b> | <b>up</b> | <b>noncoding</b> |
| ASHGA5P044594        | 0.001461681        | 0.025539378        | 2.3279752        | up        | noncoding        |
| ASHGA5P046353        | 0.000413793        | 0.014498655        | 3.0875077        | up        | noncoding        |
| ASHGA5P006991        | 5.27433E-05        | 0.007400226        | 2.9141016        | up        | noncoding        |
| ASHGA5P038317        | 0.002054702        | 0.029861322        | 3.7482316        | up        | noncoding        |
| ASHGA5P022446        | 0.001268127        | 0.023779671        | 2.9983689        | up        | noncoding        |
| ASHGA5P022446        | 0.001268127        | 0.023779671        | 2.9983689        | up        | noncoding        |
| ASHGA5P020832        | 0.007114641        | 0.053286323        | 3.280314         | up        | noncoding        |
| ASHGA5P020832        | 0.007114641        | 0.053286323        | 3.280314         | up        | noncoding        |
| ASHGA5P044940        | 0.018639342        | 0.083001898        | 2.3522933        | up        | noncoding        |
| ASHGA5P049045        | 0.002876416        | 0.034719588        | 2.0727459        | up        | noncoding        |
| ASHGA5P049045        | 0.002876416        | 0.034719588        | 2.0727459        | up        | noncoding        |
| ASHGA5P049045        | 0.002876416        | 0.034719588        | 2.0727459        | up        | noncoding        |
| ASHGA5P041021        | 0.001556104        | 0.026510436        | 3.0809507        | up        | noncoding        |
| ASHGA5P053406        | 0.000431208        | 0.014669266        | 4.3437683        | up        | noncoding        |
| ASHGA5P026974        | 0.001230775        | 0.023565796        | 3.6980251        | up        | noncoding        |
| ASHGA5P045405        | 0.013918895        | 0.07221887         | 4.0411521        | up        | noncoding        |
| ASHGA5P046198        | 0.002114507        | 0.030299337        | 3.3298833        | up        | noncoding        |
| ASHGA5P046198        | 0.002114507        | 0.030299337        | 3.3298833        | up        | noncoding        |
| ASHGA5P026668        | 0.031469451        | 0.111346021        | 2.3128638        | up        | noncoding        |
| ASHGA5P026668        | 0.031469451        | 0.111346021        | 2.3128638        | up        | noncoding        |
| ASHGA5P026668        | 0.031469451        | 0.111346021        | 2.3128638        | up        | noncoding        |
| ASHGA5P026668        | 0.031469451        | 0.111346021        | 2.3128638        | up        | noncoding        |
| ASHGA5P015097        | 0.015707767        | 0.076574828        | 2.370623         | up        | noncoding        |
| ASHGA5P015768        | 0.048845665        | 0.14359352         | 3.602627         | up        | noncoding        |
| ASHGA5P045312        | 0.037561066        | 0.122993662        | 2.1085795        | up        | noncoding        |
| <b>ASHGA5P019889</b> | <b>0.00018175</b>  | <b>0.011439647</b> | <b>2.775264</b>  | <b>up</b> | <b>noncoding</b> |
| ASHGA5P032024        | 0.033719484        | 0.115849652        | 2.0050818        | up        | noncoding        |
| ASHGA5P030748        | 0.012857912        | 0.069419086        | 3.0416767        | up        | noncoding        |
| ASHGA5P057077        | 0.009653623        | 0.060964991        | 2.0448765        | up        | noncoding        |
| ASHGA5P037807        | 0.03527683         | 0.118945997        | 3.2878697        | up        | noncoding        |
| ASHGA5P053428        | 0.00106613         | 0.022073729        | 2.5005624        | up        | noncoding        |

|                    |                    |                     |       |       |   |
|--------------------|--------------------|---------------------|-------|-------|---|
| NR_045617          | SMPX               | RefSeq              | 1053  | chrX  | - |
| ENST00000500370    | SNHG10             | GENCODE             | 1531  | chr14 | - |
| uc009ywt.1         | AK313893           | UCSC_knowngene      | 741   | chr11 | - |
| ENST00000452037    | AC104655.3         | GENCODE             | 515   | chr2  | + |
| uc001icl.1         | BC043220           | UCSC_knowngene      | 755   | chr1  | - |
| ENST00000539233    | C11orf95           | GENCODE             | 351   | chr11 | - |
| AA151944           |                    | LincRNAs identified | 518   | chr13 | + |
| ENST00000422703    | MLK7-AS1           | GENCODE             | 447   | chr2  | - |
| ENST00000422703    | MLK7-AS1           | GENCODE             | 447   | chr2  | - |
| ENST00000573177    | RP11-874J12.1      | GENCODE             | 1388  | chr18 | + |
| ENST00000573177    | RP11-874J12.1      | GENCODE             | 1388  | chr18 | + |
| ENST00000573177    | RP11-874J12.1      | GENCODE             | 1388  | chr18 | + |
| ENST00000573177    | RP11-874J12.1      | GENCODE             | 1388  | chr18 | + |
| ENST00000573177    | RP11-874J12.1      | GENCODE             | 1388  | chr18 | + |
| ENST00000573177    | RP11-874J12.1      | GENCODE             | 1388  | chr18 | + |
| ENST00000573177    | RP11-874J12.1      | GENCODE             | 1388  | chr18 | + |
| ENST00000573177    | RP11-874J12.1      | GENCODE             | 1388  | chr18 | + |
| ENST00000573177    | RP11-874J12.1      | GENCODE             | 1388  | chr18 | + |
| ENST00000537346    | DENND5B-AS1        | GENCODE             | 1106  | chr12 | + |
| ENST00000418874    | AP006748.1         | GENCODE             | 346   | chr21 | - |
| chr7:149967450-150 | chr7:149967450-150 | LincRNAs identified | 34300 | chr7  | - |
| ENST00000422438    | RP11-431J24.2      | GENCODE             | 392   | chrX  | - |
| ENST00000537869    | SNHG1              | GENCODE             | 1038  | chr11 | - |
| ENST00000537869    | SNHG1              | GENCODE             | 1038  | chr11 | - |
| ENST00000537869    | SNHG1              | GENCODE             | 1038  | chr11 | - |
| ENST00000567788    | RP11-474D1.3       | GENCODE             | 4592  | chr12 | - |
| NR_047594          | CENPJ              | RefSeq              | 5246  | chr13 | - |
| ENST00000502082    | RP11-382A18.1      | GENCODE             | 1420  | chr8  | - |
| NR_073073          | TFAM               | RefSeq              | 5386  | chr10 | + |
| NR_073073          | TFAM               | RefSeq              | 5386  | chr10 | + |
| NR_034039          | SORD               | RefSeq              | 2898  | chr15 | + |
| uc003ysl.3         | PVT1               | UCSC_knowngene      | 1738  | chr8  | + |
| ENST00000524499    | CTD-3065J16.9      | GENCODE             | 1264  | chr8  | - |
| ENST00000435597    | RP11-1114A5.4      | GENCODE             | 3018  | chrX  | - |
| NR_036659          | ZNFX1-AS1          | RefSeq              | 516   | chr20 | + |
| ENST00000497543    | FAM86DP            | GENCODE             | 2152  | chr3  | - |
| ENST00000556874    | RP11-72M17.1       | GENCODE             | 1206  | chr14 | - |
| ENST00000556874    | RP11-72M17.1       | GENCODE             | 1206  | chr14 | - |
| NR_036633          | VAPB               | RefSeq              | 7764  | chr20 | + |
| NR_036633          | VAPB               | RefSeq              | 7764  | chr20 | + |
| TCONS_00015497     | XLOC_007210        | LincRNAs identified | 327   | chr8  | - |
| NR_040252          | ANKS3              | RefSeq              | 2667  | chr16 | - |
| NR_040252          | ANKS3              | RefSeq              | 2667  | chr16 | - |
| NR_040252          | ANKS3              | RefSeq              | 2667  | chr16 | - |
| ENST00000423102    | PMCHL1             | pseudogene          | 261   | chr5  | + |
| ENST00000442067    | GAS5               | GENCODE             | 1114  | chr1  | - |
| ENST00000547042    | RP4-816N1.7        | GENCODE             | 287   | chr12 | - |
| TCONS_00000867     | XLOC_000095        | LincRNAs identified | 263   | chr1  | + |
| ENST00000412242    | KDM5C-IT1          | GENCODE             | 755   | chrX  | - |
| ENST00000412242    | KDM5C-IT1          | GENCODE             | 755   | chrX  | - |
| ENST00000526730    | RP11-7I15.4        | GENCODE             | 277   | chr11 | + |
| ENST00000526730    | RP11-7I15.4        | GENCODE             | 277   | chr11 | + |
| ENST00000526730    | RP11-7I15.4        | GENCODE             | 277   | chr11 | + |
| ENST00000526730    | RP11-7I15.4        | GENCODE             | 277   | chr11 | + |
| uc001vgk.2         | THSD1P1            | UCSC_knowngene      | 2751  | chr13 | - |
| ENST00000423332    | CYP4Z2P            | pseudogene          | 1512  | chr1  | - |
| ENST00000429700    | RP11-82L18.2       | GENCODE             | 585   | chr9  | - |
| ENST00000504719    | PVT1               | GENCODE             | 754   | chr8  | + |
| ENST00000450026    | AFG3L1P            | GENCODE             | 494   | chr16 | + |
| ENST00000579581    | RP11-697E2.7       | pseudogene          | 588   | chr15 | + |
| TCONS_00012677     | XLOC_005635        | LincRNAs identified | 335   | chr6  | - |
| NR_026919          | LOC150197          | RefSeq              | 2206  | chr22 | + |
| ENST00000449589    | GAS5               | GENCODE             | 712   | chr1  | - |

|           |           |                                           |                       |
|-----------|-----------|-------------------------------------------|-----------------------|
| 21724089  | 21776278  | AAATAAGTATCA, 23676                       | exon sense-overlappi  |
| 95998633  | 96001137  | CTTATATCCTGAGACAGAACAGTAA                 | natural antisense     |
| 96122322  | 96123063  | CGCCAAAGAGGTTTGTAAATCATGAA                | exon sense-overlappi  |
| 105760580 | 105761370 | CTCTGGGCAGAGGCCACGCGGGGAC                 | intergenic            |
| 247337903 | 247338870 | CTCACATGATCTATTTGAGGTCTTGC                | intergenic            |
| 63531311  | 63533434  | ENST00000433688, GGGCCTGGGGAGGAGGCTGAAGGA | exon sense-overlappi  |
| 20180452  | 20180928  | ACCTGAGGCTGGGCAAGGGGAATAC                 | intergenic            |
| 174031457 | 174136348 | TGCCTGGGAGGT, 339751                      | intronic antisense    |
| 174031457 | 174136348 | TGCCTGGGAGGT, 339751                      | intronic antisense    |
| 3602997   | 3604385   | AGTTTTAGCAAAAAGCAGCAACAAAT                | intronic antisense    |
| 3602997   | 3604385   | AGTTTTAGCAAAAAGCAGCAACAAAT                | intronic antisense    |
| 3602997   | 3604385   | AGTTTTAGCAAAAAGCAGCAACAAAT                | intronic antisense    |
| 3602997   | 3604385   | AGTTTTAGCAAAAAGCAGCAACAAAT                | intronic antisense    |
| 3602997   | 3604385   | AGTTTTAGCAAAAAGCAGCAACAAAT                | intronic antisense    |
| 3602997   | 3604385   | AGTTTTAGCAAAAAGCAGCAACAAAT                | intronic antisense    |
| 3602997   | 3604385   | AGTTTTAGCAAAAAGCAGCAACAAAT                | intronic antisense    |
| 3602997   | 3604385   | AGTTTTAGCAAAAAGCAGCAACAAAT                | intronic antisense    |
| 31744245  | 31768600  | GAGGGCCTCTTC, 100874249                   | bidirectional         |
| 42948061  | 42953246  | TGTCTCATCTGCACCTGGGCACGTG                 | intergenic            |
| 150336517 | 150370817 | ATAATTAAGAATTCAGGAGATGTTT                 | intergenic            |
| 16171063  | 16175952  | CCTCCATCAAATATTCCTGAAAACA                 | natural antisense     |
| 62619462  | 62622932  | ENST00000537068, GGACTGGCTGTC, 23642      | bidirectional         |
| 62619462  | 62622932  | ENST00000537068, GGACTGGCTGTC, 23642      | bidirectional         |
| 62619462  | 62622932  | ENST00000537068, GGACTGGCTGTC, 23642      | bidirectional         |
| 130517998 | 130529602 | TTCCCTGTATCTAAATTTAGCAAGT                 | intergenic            |
| 25456411  | 25497027  | ACATCCAGCTCTC, 55835                      | exon sense-overlappi  |
| 128302061 | 128494384 | TTAAAAAAGCTTTGTGCTGATGAA                  | intronic antisense    |
| 60144902  | 60158990  | TTTTTCTGGCTCA, 7019                       | exon sense-overlappi  |
| 60144902  | 60158990  | TTTTTCTGGCTCA, 7019                       | exon sense-overlappi  |
| 45315301  | 45367287  | TGGGATCATCGG, 6652                        | exon sense-overlappi  |
| 128902834 | 129113499 | ENST00000504719, AAAGATGCCCT, 5820        | intronic antisense    |
| 145132904 | 145134168 | GTATGTCTGTTTATCTCTTGCCACTT                | natural antisense     |
| 135923089 | 135929956 | CAGTGCTGAGAAATATGAGGTTCTG                 | intergenic            |
| 47895178  | 47905795  | ENST00000428008, TTTGTGTGTGGT, 441951     | bidirectional         |
| 75470702  | 75484199  | ENST00000491583, GGGGCAGACGCG, 692099     | intergenic            |
| 66697050  | 66976112  | TCTCGTCCAGTGTGACATTCCTCAG,                | intronic antisense    |
| 66697050  | 66976112  | TCTCGTCCAGTGTGACATTCCTCAG,                | intronic antisense    |
| 56964174  | 57026156  | GGAATCATCGAT, 9217                        | exon sense-overlappi  |
| 56964174  | 57026156  | GGAATCATCGAT, 9217                        | exon sense-overlappi  |
| 127630407 | 127634583 | TTTTAGAGCTGGGATGGATTTTCCA,                | intergenic            |
| 4746510   | 4784378   | TAACGCACGTTCT, 124401                     | exon sense-overlappi  |
| 4746510   | 4784378   | TAACGCACGTTCT, 124401                     | exon sense-overlappi  |
| 4746510   | 4784378   | TAACGCACGTTCT, 124401                     | natural antisense     |
| 22142481  | 22143012  | ENST00000415808, GAGAACTGGGG, 5369        |                       |
| 173833768 | 173836181 | ENST00000416952, TGAAACAGTAGT, 60674      | intergenic            |
| 2906301   | 2913104   | AAGGAGAATTTGTCCTTGCGATCCA                 | natural antisense     |
| 24348318  | 24350190  | ATAAAAGTTGATGAAGCTGTAGCAC                 | intergenic            |
| 53241589  | 53243861  | GGCTAAATTGTGTGTTAGAACTCT,                 | intron sense-overlapp |
| 53241589  | 53243861  | GGCTAAATTGTGTGTTAGAACTCT,                 | intron sense-overlapp |
| 77733978  | 77734767  | CGAAAGGAGAGTGATCCCAGCAGG,                 | intronic antisense    |
| 77733978  | 77734767  | CGAAAGGAGAGTGATCCCAGCAGG,                 | intronic antisense    |
| 77733978  | 77734767  | CGAAAGGAGAGTGATCCCAGCAGG,                 | intronic antisense    |
| 77733978  | 77734767  | CGAAAGGAGAGTGATCCCAGCAGG,                 | intronic antisense    |
| 52741846  | 52768575  | ENST00000416599, GAGCTGACTGAA, 374500     | intergenic            |
| 47308849  | 47366106  | CTATGCCTTCATA, 163720                     |                       |
| 91703801  | 91724849  | AGCTCTCAGGTCACCTTCTGGCTTCC,               | intron sense-overlapp |
| 128806778 | 128903221 | ENST00000522963, ACCCCTAAGGGC, 5820       | intergenic            |
| 90038996  | 90044363  | ENST00000423742, TTAACAGCATGA, 172        | natural antisense     |
| 90818360  | 90818948  | TGGTAATTTACCCCGTGAAGTACACTCAACCTTCAACC    |                       |
| 20331467  | 20332657  | TAATAGAGCTATTCCTCACTCTCCC,                | intergenic            |
| 20193854  | 20196060  | GGACATTTATCA, 150197                      | exon sense-overlappi  |
| 173833153 | 173837127 | ENST00000416952, CCATTGGATGTG, 60674      | bidirectional         |

|                        |               |                          |           |           |
|------------------------|---------------|--------------------------|-----------|-----------|
| NM_014332              | SMPX          | small muscular prote -   | 21724089  | 21776278  |
| ENST00000331334        | GLRX5         | glutaredoxin 5 [Sour+]   | 96000929  | 96011055  |
| NM_024725              | CCDC82        | coiled-coil domain-ci-   | 96085928  | 96123083  |
| NM_001144936           | C11orf95      | uncharacterized prote -  | 63527363  | 63536113  |
| NM_016653              | ZAK           | mitogen-activated pr+]   | 173940564 | 174132737 |
| NM_133646              | ZAK           | mitogen-activated pr+]   | 173940564 | 174091873 |
| NM_001003809           | DLGAP1        | disks large-associat+]   | 3496029   | 3845358   |
| NM_001242761           | DLGAP1        | disks large-associat+]   | 3502142   | 4455266   |
| NM_001242762           | DLGAP1        | disks large-associat+]   | 3496029   | 3874767   |
| NM_001242763           | DLGAP1        | disks large-associat+]   | 3496029   | 3874767   |
| NM_001242764           | DLGAP1        | disks large-associat+]   | 3496029   | 3874253   |
| NM_001242765           | DLGAP1        | disks large-associat+]   | 3502142   | 3845358   |
| NM_001242766           | DLGAP1        | disks large-associat+]   | 3496029   | 3845358   |
| NM_004746              | DLGAP1        | disks large-associat+]   | 3496029   | 4455266   |
| NM_144973              | DENND5B       | DENN domain-conta-       | 31535156  | 31743952  |
| NM_005314              | GRPR          | gastrin-releasing pep+]  | 16141423  | 16171641  |
| NM_001012662           | SLC3A2        | 4F2 cell-surface antiq+] | 62623483  | 62656355  |
| NM_001012664           | SLC3A2        | 4F2 cell-surface antiq+] | 62623483  | 62656355  |
| NM_002394              | SLC3A2        | 4F2 cell-surface antiq+] | 62623483  | 62656355  |
| NM_018451              | CENPJ         | centromere protein J -   | 25456411  | 25497027  |
| NM_001159542           | POU5F1B       | putative POU domain+]    | 128427856 | 128429441 |
| NM_001270782           | TFAM          | transcription factor A+] | 60144902  | 60158990  |
| NM_003201              | TFAM          | transcription factor A+] | 60144902  | 60158990  |
| NM_003104              | SORD          | sorbitol dehydrogena+]   | 45315301  | 45367287  |
| ENST00000539634        | TMEM75        | transmembrane prote -    | 128959125 | 128960591 |
| NM_019037              | EXOSC4        | exosome complex co+]     | 145133521 | 145135551 |
| NM_021035              | ZNFX1         | NFX1-type zinc fing-]    | 47862438  | 47894756  |
| NM_001024218           | GPHN          | gephyrin isoform 2 +]    | 66974124  | 67648525  |
| NM_020806              | GPHN          | gephyrin isoform 1 +]    | 66974124  | 67648525  |
| NM_001195677           | VAPB          | vesicle-associated mc+]  | 56964174  | 57026156  |
| NM_004738              | VAPB          | vesicle-associated mc+]  | 56964174  | 57026156  |
| NM_001242929           | ANKS3         | ankyrin repeat and S-]   | 4746510   | 4784378   |
| NM_133450              | ANKS3         | ankyrin repeat and S-]   | 4746510   | 4784163   |
| NM_139170              | C16orf71      | uncharacterized prote+]  | 4784288   | 4799397   |
| NM_002014              | FKBP4         | peptidyl-prolyl cis-tr+] | 2904107   | 2914587   |
| NM_001146702           | KDM5C         | lysine-specific demet-]  | 53220502  | 53254604  |
| NM_004187              | KDM5C         | lysine-specific demet-]  | 53220502  | 53254604  |
| NM_001203260           | NDUFC2-KCTD14 | NDUFC2-KCTD14 1-]        | 77726760  | 77791265  |
| NM_001203261           | NDUFC2-KCTD14 | NDUFC2-KCTD14 1-]        | 77726760  | 77791265  |
| NM_001203262           | NDUFC2-KCTD14 | NDUFC2-KCTD14 1-]        | 77726760  | 77791265  |
| NM_023930              | KCTD14        | BTB/POZ domain-cc-       | 77726760  | 77734320  |
| NM_016848              | SHC3          | SHC-transforming pr-]    | 91620685  | 91793682  |
| NM_145039              | CENPBD1       | CENPB DNA-bindin-]       | 90036182  | 90039240  |
| TTCATGCCAAGCCCCGCTGTCA |               |                          |           |           |
| ENST00000423736        | AC007663.1    | Em:AC006547.7 pro+]      | 20194099  | 20194706  |
| NM_001122770           | ZBTB37        | zinc finger and BTB +]   | 173837492 | 173855774 |

|                   |                  |                 |                 |                 |                  |
|-------------------|------------------|-----------------|-----------------|-----------------|------------------|
| 193.50021         | 5.497516         | 6.142829        | 2.585559        | 375.07416       | 38.02748         |
| 61.789583         | 19.305665        | 5.562189        | 4.506525        | 64.46585        | 83.22551         |
| 50.109423         | 18.398614        | 5.218266        | 3.913267        | 51.55842        | 26.24899         |
| 46.395022         | 15.125728        | 5.185904        | 4.145857        | 54.521076       | 51.19112         |
| 38.277186         | 10.58105         | 4.672685        | 3.425993        | 26.068085       | 16.59449         |
| 413.52509         | 91.198744        | 8.284008        | 6.820431        | 431.67288       | 557.85815        |
| 4533.412417       | 329.692318       | 11.506861       | 8.681087        | 3964.2446       | 4976.288         |
| 48.223051         | 10.167999        | 4.856377        | 3.462891        | 23.209707       | 19.124321        |
| 48.223051         | 10.167999        | 4.856377        | 3.462891        | 23.209707       | 19.124321        |
| 81.420695         | 23.065923        | 5.896903        | 4.69693         | 87.37382        | 55.524643        |
| 81.420695         | 23.065923        | 5.896903        | 4.69693         | 87.37382        | 55.524643        |
| 81.420695         | 23.065923        | 5.896903        | 4.69693         | 87.37382        | 55.524643        |
| 81.420695         | 23.065923        | 5.896903        | 4.69693         | 87.37382        | 55.524643        |
| 81.420695         | 23.065923        | 5.896903        | 4.69693         | 87.37382        | 55.524643        |
| 81.420695         | 23.065923        | 5.896903        | 4.69693         | 87.37382        | 55.524643        |
| 81.420695         | 23.065923        | 5.896903        | 4.69693         | 87.37382        | 55.524643        |
| 81.420695         | 23.065923        | 5.896903        | 4.69693         | 87.37382        | 55.524643        |
| 81.420695         | 23.065923        | 5.896903        | 4.69693         | 87.37382        | 55.524643        |
| 210.84899         | 50.462572        | 7.211775        | 5.877614        | 309.6198        | 299.76157        |
| 26.950785         | 7.639889         | 4.404308        | 2.946319        | 31.11921        | 17.990705        |
| 908.6792          | 211.520507       | 9.4108          | 7.795857        | 1148.8248       | 1084.12          |
| 649.905942        | 5.071188         | 7.046042        | 2.412862        | 1247.1539       | 41.455643        |
| 35295.024         | 6514.60715       | 14.674772       | 13.016704       | 38133.566       | 26421.146        |
| 35295.024         | 6514.60715       | 14.674772       | 13.016704       | 38133.566       | 26421.146        |
| 35295.024         | 6514.60715       | 14.674772       | 13.016704       | 38133.566       | 26421.146        |
| 401.197882        | 54.53392         | 7.850373        | 5.906771        | 638.0737        | 1002.6972        |
| 58.127653         | 19.227146        | 5.462318        | 4.378591        | 47.46198        | 36.300156        |
| 61.504814         | 9.486939         | 5.212792        | 3.269636        | 101.07288       | 97.10215         |
| 23.294835         | 8.622724         | 4.146599        | 2.975627        | 28.068836       | 38.785828        |
| 23.294835         | 8.622724         | 4.146599        | 2.975627        | 28.068836       | 38.785828        |
| 195.623483        | 31.527309        | 7.177672        | 5.215147        | 205.92928       | 324.00504        |
| <b>232.127705</b> | <b>44.793273</b> | <b>7.378391</b> | <b>5.773078</b> | <b>186.2318</b> | <b>154.46869</b> |
| 1469.490028       | 374.561695       | 10.067473       | 8.848397        | 1290.4369       | 832.20667        |
| 510.548848        | 97.076997        | 8.572263        | 6.94582         | 457.76242       | 336.869          |
| 3296.466167       | 611.482657       | 11.164933       | 9.621882        | 3909.2944       | 5344.067         |
| 436.086925        | 61.933528        | 8.156973        | 6.250763        | 627.0881        | 960.65466        |
| 239.530098        | 45.480465        | 7.363177        | 5.779           | 318.26108       | 447.5427         |
| 239.530098        | 45.480465        | 7.363177        | 5.779           | 318.26108       | 447.5427         |
| 58.680176         | 13.019402        | 5.472931        | 3.759097        | 76.610794       | 89.37592         |
| 58.680176         | 13.019402        | 5.472931        | 3.759097        | 76.610794       | 89.37592         |
| 50.427592         | 12.824626        | 5.09409         | 3.860022        | 65.53986        | 107.36382        |
| 165.79517         | 52.956429        | 7.016241        | 5.964698        | 172.01569       | 192.74422        |
| 165.79517         | 52.956429        | 7.016241        | 5.964698        | 172.01569       | 192.74422        |
| 165.79517         | 52.956429        | 7.016241        | 5.964698        | 172.01569       | 192.74422        |
| 34.922679         | 7.717003         | 4.637247        | 3.013872        | 19.984411       | 41.80718         |
| 1065.8027         | 148.136635       | 9.629541        | 7.510594        | 1128.0826       | 1196.3378        |
| 46.222071         | 8.490223         | 5.153827        | 3.267072        | 52.96162        | 68.09419         |
| 228.322218        | 25.976891        | 6.964549        | 4.949782        | 362.5893        | 581.42865        |
| 242.116718        | 46.684717        | 7.310424        | 5.574953        | 270.23535       | 368.70798        |
| 242.116718        | 46.684717        | 7.310424        | 5.574953        | 270.23535       | 368.70798        |
| 73.773163         | 17.884516        | 5.607278        | 4.397598        | 105.037094      | 73.90427         |
| 73.773163         | 17.884516        | 5.607278        | 4.397598        | 105.037094      | 73.90427         |
| 73.773163         | 17.884516        | 5.607278        | 4.397598        | 105.037094      | 73.90427         |
| 73.773163         | 17.884516        | 5.607278        | 4.397598        | 105.037094      | 73.90427         |
| 231.637077        | 61.528602        | 7.407647        | 6.162381        | 191.74554       | 114.5608         |
| 66.769513         | 12.382673        | 5.576433        | 3.727384        | 52.52818        | 19.946407        |
| 58.980414         | 16.100954        | 5.353325        | 4.277054        | 107.284615      | 84.50338         |
| <b>80.997372</b>  | <b>17.902226</b> | <b>5.909396</b> | <b>4.436771</b> | <b>65.5435</b>  | <b>51.824738</b> |
| 59.405074         | 23.273972        | 5.545419        | 4.541758        | 65.41221        | 60.50814         |
| 1475.970417       | 335.637843       | 9.963951        | 8.359084        | 1307.4318       | 431.3474         |
| 315.971278        | 105.475909       | 7.917946        | 6.885932        | 397.78214       | 386.79968        |
| 134.27164         | 35.802259        | 6.64363         | 4.926477        | 94.10796        | 75.68579         |
| 825.74361         | 203.031225       | 9.278482        | 7.956229        | 801.2823        | 829.60156        |

|                  |                  |                  |                  |                  |                  |
|------------------|------------------|------------------|------------------|------------------|------------------|
| 628.30304        | 51.90251         | 22.127108        | 45.566963        | 4.9999995        | 7.9851007        |
| 46.57303         | 42.373077        | 67.09458         | 67.00545         | 17.581356        | 12.358489        |
| 78.47563         | 30.323256        | 52.797836        | 61.252407        | 25.080442        | 8.090246         |
| 56.626587        | 40.794445        | 34.450146        | 40.78676         | 10.580701        | 12.896919        |
| 21.43933         | 90.429504        | 19.168657        | 55.96305         | 10.50451         | 4.9999995        |
| 287.7151         | 370.7171         | 360.72073        | 472.46658        | 73.78375         | 87.023155        |
| 2928.9592        | 1293.5687        | 7656.922         | 6380.492         | 249.97137        | 264.6478         |
| 18.790335        | 28.807175        | 112.62296        | 86.783806        | 13.11815         | 4.9999995        |
| 18.790335        | 28.807175        | 112.62296        | 86.783806        | 13.11815         | 4.9999995        |
| 102.247375       | 35.650723        | 102.1504         | 105.57721        | 18.54983         | 12.109049        |
| 102.247375       | 35.650723        | 102.1504         | 105.57721        | 18.54983         | 12.109049        |
| 102.247375       | 35.650723        | 102.1504         | 105.57721        | 18.54983         | 12.109049        |
| 102.247375       | 35.650723        | 102.1504         | 105.57721        | 18.54983         | 12.109049        |
| 102.247375       | 35.650723        | 102.1504         | 105.57721        | 18.54983         | 12.109049        |
| 102.247375       | 35.650723        | 102.1504         | 105.57721        | 18.54983         | 12.109049        |
| 102.247375       | 35.650723        | 102.1504         | 105.57721        | 18.54983         | 12.109049        |
| 102.247375       | 35.650723        | 102.1504         | 105.57721        | 18.54983         | 12.109049        |
| 102.247375       | 35.650723        | 102.1504         | 105.57721        | 18.54983         | 12.109049        |
| 274.94254        | 86.89063         | 158.53113        | 135.34827        | 63.927128        | 61.069927        |
| 38.947624        | 29.011154        | 19.797714        | 24.838305        | 4.9999995        | 4.9999995        |
| 705.2297         | 654.9577         | 960.8973         | 898.0457         | 183.8524         | 68.40395         |
| 2433.9512        | 35.83055         | 69.88887         | 71.15549         | 5.427133         | 4.9999995        |
| 35182.41         | 32780.11         | 38222.402        | 41030.51         | 6768.6494        | 3233.3318        |
| 35182.41         | 32780.11         | 38222.402        | 41030.51         | 6768.6494        | 3233.3318        |
| 35182.41         | 32780.11         | 38222.402        | 41030.51         | 6768.6494        | 3233.3318        |
| 165.65045        | 118.865524       | 232.32968        | 249.57074        | 73.52752         | 113.111206       |
| 51.930447        | 47.504604        | 86.11431         | 79.45442         | 14.72946         | 6.0665293        |
| 105.05042        | 20.240002        | 21.866482        | 23.696949        | 8.366385         | 9.458083         |
| 21.417742        | 16.471212        | 17.40726         | 17.618132        | 10.77374         | 4.9999995        |
| 21.417742        | 16.471212        | 17.40726         | 17.618132        | 10.77374         | 4.9999995        |
| 118.44699        | 138.11862        | 177.81229        | 209.42868        | 29.490196        | 21.27087         |
| <b>189.45558</b> | <b>458.83124</b> | <b>134.95522</b> | <b>268.8237</b>  | <b>37.758896</b> | <b>32.919254</b> |
| 1583.02          | 2022.2769        | 1190.028         | 1898.9717        | 312.99838        | 199.52718        |
| 604.4068         | 678.0396         | 389.13397        | 597.0813         | 97.76855         | 84.60902         |
| 1852.2235        | 3595.9915        | 2009.3009        | 3067.9197        | 564.0029         | 672.2401         |
| 284.86203        | 211.90894        | 265.43076        | 266.57706        | 59.82941         | 64.865425        |
| 158.6369         | 249.5596         | 89.643906        | 173.5364         | 39.437           | 59.09107         |
| 158.6369         | 249.5596         | 89.643906        | 173.5364         | 39.437           | 59.09107         |
| 55.610413        | 49.21062         | 37.355457        | 43.917854        | 14.45565         | 6.3851333        |
| 55.610413        | 49.21062         | 37.355457        | 43.917854        | 14.45565         | 6.3851333        |
| 23.806942        | 24.668499        | 42.42699         | 38.75944         | 13.966959        | 9.60096          |
| 147.07736        | 145.52489        | 154.78131        | 182.62755        | 44.043987        | 28.284166        |
| 147.07736        | 145.52489        | 154.78131        | 182.62755        | 44.043987        | 28.284166        |
| 147.07736        | 145.52489        | 154.78131        | 182.62755        | 44.043987        | 28.284166        |
| 13.280659        | 34.16982         | 46.301426        | 53.99258         | 5.401293         | 4.9999995        |
| 1024.0413        | 1251.6981        | 646.6386         | 1148.0178        | 118.57551        | 90.4957          |
| 31.010374        | 41.60133         | 41.526787        | 42.138123        | 12.297108        | 5.375254         |
| 97.402985        | 172.60867        | 39.572296        | 116.331406       | 25.741201        | 28.068846        |
| 127.88959        | 61.856686        | 341.8901         | 282.1206         | 55.112892        | 32.5592          |
| 127.88959        | 61.856686        | 341.8901         | 282.1206         | 55.112892        | 32.5592          |
| 132.72073        | 18.738182        | 51.431194        | 60.807507        | 17.212166        | 10.71681         |
| 132.72073        | 18.738182        | 51.431194        | 60.807507        | 17.212166        | 10.71681         |
| 132.72073        | 18.738182        | 51.431194        | 60.807507        | 17.212166        | 10.71681         |
| 132.72073        | 18.738182        | 51.431194        | 60.807507        | 17.212166        | 10.71681         |
| 270.6839         | 354.42593        | 167.72984        | 290.67645        | 64.762405        | 38.095966        |
| 76.52652         | 61.311428        | 91.80653         | 98.49801         | 16.067297        | 20.87161         |
| 48.97654         | 21.761593        | 46.23188         | 45.124474        | 16.065222        | 9.943064         |
| <b>68.784546</b> | <b>146.81067</b> | <b>51.97729</b>  | <b>101.04349</b> | <b>16.866161</b> | <b>12.470498</b> |
| 55.48839         | 71.68754         | 42.053974        | 61.28019         | 17.011951        | 7.4844155        |
| 2279.19          | 2061.681         | 1090.1465        | 1686.0258        | 361.87622        | 79.18389         |
| 267.80173        | 261.9244         | 290.05515        | 291.46457        | 105.481186       | 52.323505        |
| 118.3938         | 218.78432        | 126.51539        | 172.14258        | 50.65581         | 9.061884         |
| 761.5928         | 1073.6698        | 571.1064         | 917.2088         | 179.47456        | 85.19255         |



|                  |                  |                  |                  |                  |                  |
|------------------|------------------|------------------|------------------|------------------|------------------|
| 4.9999995        | 4.9999995        | 4.9999995        | 4.9999995        | 8.086212         | 5.150998         |
| 30.256271        | 15.122211        | 22.961292        | 17.554373        | 5.5516243        | 6.1831684        |
| 52.209957        | 5.8535695        | 14.15747         | 4.9999995        | 5.222305         | 4.663017         |
| 12.802802        | 28.826996        | 12.828519        | 12.81843         | 5.3016605        | 5.5434933        |
| 14.059541        | 20.168295        | 6.1027164        | 7.651237         | 4.246353         | 4.0633783        |
| 58.599426        | 133.23413        | 102.472084       | 92.07992         | 8.291409         | 8.813948         |
| 207.92429        | 354.50818        | 509.00067        | 392.1016         | 11.455366        | 11.8192625       |
| 12.44121         | 10.95663         | 10.562269        | 8.929734         | 4.0732503        | 4.243498         |
| 12.44121         | 10.95663         | 10.562269        | 8.929734         | 4.0732503        | 4.243498         |
| 14.509579        | 21.682926        | 46.601578        | 24.942577        | 5.99547          | 5.6437745        |
| 14.509579        | 21.682926        | 46.601578        | 24.942577        | 5.99547          | 5.6437745        |
| 14.509579        | 21.682926        | 46.601578        | 24.942577        | 5.99547          | 5.6437745        |
| 14.509579        | 21.682926        | 46.601578        | 24.942577        | 5.99547          | 5.6437745        |
| 14.509579        | 21.682926        | 46.601578        | 24.942577        | 5.99547          | 5.6437745        |
| 14.509579        | 21.682926        | 46.601578        | 24.942577        | 5.99547          | 5.6437745        |
| 14.509579        | 21.682926        | 46.601578        | 24.942577        | 5.99547          | 5.6437745        |
| 14.509579        | 21.682926        | 46.601578        | 24.942577        | 5.99547          | 5.6437745        |
| 14.509579        | 21.682926        | 46.601578        | 24.942577        | 5.99547          | 5.6437745        |
| 77.56689         | 41.369778        | 31.538446        | 27.30326         | 7.8185415        | 7.9555635        |
| 5.543768         | 4.9999995        | 14.118321        | 11.177248        | 4.502668         | 4.1658506        |
| 542.2288         | 149.40291        | 166.1676         | 159.06738        | 9.69575          | 9.733742         |
| 4.9999995        | 4.9999995        | 4.9999995        | 4.9999995        | 9.810356         | 5.263874         |
| 9989.955         | 5463.639         | 7792.0737        | 5839.994         | 14.810216        | 14.296818        |
| 9989.955         | 5463.639         | 7792.0737        | 5839.994         | 14.810216        | 14.296818        |
| 9989.955         | 5463.639         | 7792.0737        | 5839.994         | 14.810216        | 14.296818        |
| 36.20144         | 41.347225        | 36.810307        | 26.20582         | 8.844283         | 9.623875         |
| 33.151485        | 20.755278        | 24.912983        | 15.74714         | 5.111353         | 5.0903254        |
| 4.9999995        | 4.9999995        | 23.167637        | 5.929528         | 6.2100544        | 6.3850203        |
| 20.762564        | 4.9999995        | 4.9999995        | 5.2000413        | 4.3573346        | 5.177353         |
| 20.762564        | 4.9999995        | 4.9999995        | 5.2000413        | 4.3573346        | 5.177353         |
| 49.6806          | 20.986607        | 40.721214        | 27.014364        | 7.232936         | 8.059328         |
| <b>30.629087</b> | <b>72.17086</b>  | <b>49.191887</b> | <b>46.089653</b> | <b>7.086796</b>  | <b>7.0354357</b> |
| 477.91806        | 322.53397        | 594.49854        | 339.89404        | 9.867495         | 9.370539         |
| 100.38469        | 109.71939        | 99.35092         | 90.62941         | 8.362253         | 8.1130085        |
| 479.2018         | 830.1682         | 535.64844        | 587.6345         | 11.436981        | 11.929546        |
| 41.167824        | 68.72714         | 90.275345        | 46.736023        | 8.818264         | 9.5666065        |
| 26.837868        | 71.55732         | 32.10244         | 43.85709         | 7.8591027        | 8.495712         |
| 26.837868        | 71.55732         | 32.10244         | 43.85709         | 7.8591027        | 8.495712         |
| 25.36345         | 4.9999995        | 15.959638        | 10.95254         | 5.8045845        | 6.2767053        |
| 25.36345         | 4.9999995        | 15.959638        | 10.95254         | 5.8045845        | 6.2767053        |
| 22.323439        | 6.6169143        | 14.141722        | 10.297759        | 5.573363         | 6.528861         |
| 65.49032         | 38.476227        | 85.20919         | 56.234684        | 6.9740424        | 7.3472104        |
| 65.49032         | 38.476227        | 85.20919         | 56.234684        | 6.9740424        | 7.3472104        |
| 65.49032         | 38.476227        | 85.20919         | 56.234684        | 6.9740424        | 7.3472104        |
| 4.9999995        | 8.121324         | 12.818281        | 9.961119         | 3.861624         | 5.275325         |
| 161.3518         | 132.74504        | 228.66548        | 156.98628        | 9.664968         | 9.866973         |
| 13.985979        | 7.2753615        | 5.8389206        | 6.168716         | 5.258837         | 5.9166517        |
| 37.12191         | 15.0019          | 29.2459          | 20.681587        | 8.039865         | 8.87384          |
| 79.73476         | 11.29239         | 72.57795         | 28.831112        | 7.6201086        | 8.231701         |
| 79.73476         | 11.29239         | 72.57795         | 28.831112        | 7.6201086        | 8.231701         |
| 21.480764        | 15.030591        | 27.339083        | 15.52768         | 6.269996         | 6.024085         |
| 21.480764        | 15.030591        | 27.339083        | 15.52768         | 6.269996         | 6.024085         |
| 21.480764        | 15.030591        | 27.339083        | 15.52768         | 6.269996         | 6.024085         |
| 21.480764        | 15.030591        | 27.339083        | 15.52768         | 6.269996         | 6.024085         |
| 98.073784        | 36.101154        | 84.93642         | 47.20188         | 7.1320114        | 6.6186795        |
| 5.3371377        | 16.05418         | 4.9999995        | 10.965811        | 5.247462         | 4.2966757        |
| 18.557201        | 18.522451        | 18.620619        | 14.897168        | 6.3002176        | 6.2051883        |
| <b>14.663639</b> | <b>25.500809</b> | <b>16.02292</b>  | <b>21.889326</b> | <b>5.5734725</b> | <b>5.55934</b>   |
| 58.20099         | 19.956444        | 22.55059         | 14.439439        | 5.570228         | 5.756935         |
| 697.57666        | 104.72119        | 512.0775         | 258.3916         | 9.886148         | 8.445166         |
| 235.47246        | 89.02538         | 81.00886         | 69.54406         | 8.180854         | 8.303292         |
| 97.49439         | 10.86684         | 29.630056        | 17.104572        | 6.1090384        | 6.053564         |
| 249.72124        | 243.39584        | 249.6204         | 210.78276        | 9.185014         | 9.365079         |

|                  |                  |                  |                  |                  |                  |
|------------------|------------------|------------------|------------------|------------------|------------------|
| 8.928796         | 5.3031244        | 4.362803         | 5.0250416        | 2.3467326        | 3.7604706        |
| 5.2218676        | 4.991579         | 5.8678384        | 5.5570536        | 4.3732934        | 4.422317         |
| 5.978817         | 4.4731064        | 5.5403647        | 5.431983         | 4.8916016        | 3.7830913        |
| 5.5088496        | 4.9320064        | 4.9554305        | 4.873985         | 3.629726         | 4.486372         |
| 4.1049676        | 6.1459613        | 4.1632395        | 5.312208         | 3.6199841        | 2.4279919        |
| 7.83588          | 8.213706         | 8.237763         | 8.311342         | 6.4335265        | 7.295902         |
| 11.139539        | 10.019149        | 12.584982        | 12.022866        | 8.223052         | 8.910387         |
| 3.9139345        | 4.3887844        | 6.5992675        | 5.919529         | 3.9402096        | 2.4279919        |
| 3.9139345        | 4.3887844        | 6.5992675        | 5.919529         | 3.9402096        | 2.4279919        |
| 6.3596253        | 4.720988         | 6.459258         | 6.202302         | 4.4477262        | 4.392129         |
| 6.3596253        | 4.720988         | 6.459258         | 6.202302         | 4.4477262        | 4.392129         |
| 6.3596253        | 4.720988         | 6.459258         | 6.202302         | 4.4477262        | 4.392129         |
| 6.3596253        | 4.720988         | 6.459258         | 6.202302         | 4.4477262        | 4.392129         |
| 6.3596253        | 4.720988         | 6.459258         | 6.202302         | 4.4477262        | 4.392129         |
| 6.3596253        | 4.720988         | 6.459258         | 6.202302         | 4.4477262        | 4.392129         |
| 6.3596253        | 4.720988         | 6.459258         | 6.202302         | 4.4477262        | 4.392129         |
| 6.3596253        | 4.720988         | 6.459258         | 6.202302         | 4.4477262        | 4.392129         |
| 6.3596253        | 4.720988         | 6.459258         | 6.202302         | 4.4477262        | 4.392129         |
| 6.3596253        | 4.720988         | 6.459258         | 6.202302         | 4.4477262        | 4.392129         |
| 6.3596253        | 4.720988         | 6.459258         | 6.202302         | 4.4477262        | 4.392129         |
| 7.766587         | 6.0869474        | 7.0874557        | 6.555554         | 6.2325907        | 6.7872677        |
| 4.9681315        | 4.399888         | 4.2074895        | 4.181823         | 2.3467326        | 2.4279919        |
| 9.108781         | 9.042444         | 9.6568985        | 9.227187         | 7.7709255        | 6.9471784        |
| 10.905268        | 4.7279334        | 5.9258494        | 5.64297          | 2.6430278        | 2.4279919        |
| 14.802069        | 14.694532        | 14.810216        | 14.634781        | 13.028245        | 12.568294        |
| 14.802069        | 14.694532        | 14.810216        | 14.634781        | 13.028245        | 12.568294        |
| 14.802069        | 14.694532        | 14.810216        | 14.634781        | 13.028245        | 12.568294        |
| 7.0398436        | 6.5606337        | 7.6142225        | 7.419379         | 6.428829         | 7.671328         |
| 5.3796864        | 5.170342         | 6.223396         | 5.798806         | 4.1118026        | 3.3502028        |
| 6.398073         | 3.819745         | 4.3463387        | 4.1175203        | 3.2710438        | 4.017671         |
| 4.102395         | 3.4909449        | 4.0361457        | 3.7154195        | 3.654105         | 2.4279919        |
| 4.102395         | 3.4909449        | 4.0361457        | 3.7154195        | 3.654105         | 2.4279919        |
| 6.5696297        | 6.784023         | 7.2464523        | 7.1736655        | 5.1134753        | 5.2426343        |
| <b>7.2440968</b> | <b>8.527583</b>  | <b>6.8536906</b> | <b>7.5227437</b> | <b>5.4746904</b> | <b>5.8790426</b> |
| 10.26295         | 10.647209        | 9.953668         | 10.302975        | 8.559115         | 8.499752         |
| 8.870395         | 9.097352         | 8.352535         | 8.638033         | 6.843725         | 7.253504         |
| 10.497016        | 11.467794        | 10.681693        | 10.976569        | 9.414182         | 10.2493          |
| 7.8198905        | 7.415657         | 7.8095045        | 7.511914         | 6.140405         | 6.874795         |
| 6.97556          | 7.6539993        | 6.2779746        | 6.916716         | 5.5354834        | 6.735208         |
| 6.97556          | 7.6539993        | 6.2779746        | 6.916716         | 5.5354834        | 6.735208         |
| 5.4820085        | 5.228952         | 5.071197         | 4.97414          | 4.0826287        | 3.4278843        |
| 5.4820085        | 5.228952         | 5.071197         | 4.97414          | 4.0826287        | 3.4278843        |
| 4.26493          | 4.142945         | 5.2490444        | 4.805395         | 4.029748         | 4.0417104        |
| 6.874795         | 6.858004         | 7.057122         | 6.9862714        | 5.6937175        | 5.6589184        |
| 6.874795         | 6.858004         | 7.057122         | 6.9862714        | 5.6937175        | 5.6589184        |
| 6.874795         | 6.858004         | 7.057122         | 6.9862714        | 5.6937175        | 5.6589184        |
| 3.4040575        | 4.6556425        | 5.364009         | 5.2628264        | 2.6362064        | 2.4279919        |
| 9.625287         | 9.971427         | 9.070833         | 9.57776          | 7.126667         | 7.349266         |
| 4.647783         | 4.963566         | 5.2184324        | 4.917691         | 3.8497374        | 3.159215         |
| 6.2840014        | 7.10376          | 5.147186         | 6.3386407        | 4.9297           | 5.6483765        |
| 6.67738          | 5.5751166        | 8.162547         | 7.5956917        | 6.0210204        | 5.864086         |
| 6.67738          | 5.5751166        | 8.162547         | 7.5956917        | 6.0210204        | 5.864086         |
| 6.727361         | 3.694447         | 5.506139         | 5.4216394        | 4.3429213        | 4.211325         |
| 6.727361         | 3.694447         | 5.506139         | 5.4216394        | 4.3429213        | 4.211325         |
| 6.727361         | 3.694447         | 5.506139         | 5.4216394        | 4.3429213        | 4.211325         |
| 6.727361         | 3.694447         | 5.506139         | 5.4216394        | 4.3429213        | 4.211325         |
| 7.747083         | 8.145644         | 7.1652217        | 7.637244         | 6.252406         | 6.093305         |
| 5.942403         | 5.561391         | 6.3092628        | 6.1014056        | 4.23793          | 5.216565         |
| 5.2987275        | 3.9411843        | 5.3619757        | 5.012658         | 4.2375298        | 4.0952086        |
| <b>5.794189</b>  | <b>6.8703704</b> | <b>5.5208178</b> | <b>6.1381874</b> | <b>4.3094945</b> | <b>4.4379225</b> |
| 5.478944         | 5.8002954        | 5.2337437        | 5.432369         | 4.3245263        | 3.6656382        |
| 10.810523        | 10.673766        | 9.840263         | 10.12784         | 8.762093         | 7.157763         |
| 7.729767         | 7.7181187        | 7.9366636        | 7.6389804        | 6.959223         | 6.5582266        |
| 6.568569         | 7.462455         | 6.762277         | 6.9058785        | 5.8996315        | 3.9552395        |
| 9.222115         | 9.747093         | 8.899571         | 9.252018         | 7.7407985        | 7.264973         |

|           |           |           |           |
|-----------|-----------|-----------|-----------|
| 2.350709  | 2.3408759 | 2.3618152 | 2.352752  |
| 4.934734  | 4.05844   | 4.7940626 | 4.4563026 |
| 5.6973753 | 2.6602614 | 4.0945215 | 2.352752  |
| 3.759234  | 5.057914  | 3.9569266 | 3.9849677 |
| 3.8839915 | 4.4939203 | 2.927049  | 3.203024  |
| 5.8593426 | 7.423303  | 6.934781  | 6.9757285 |
| 7.651756  | 8.924494  | 9.224349  | 9.152482  |
| 3.721424  | 3.564649  | 3.6832945 | 3.439778  |
| 3.721424  | 3.564649  | 3.6832945 | 3.439778  |
| 3.9250717 | 4.606222  | 5.812874  | 4.99756   |
| 3.9250717 | 4.606222  | 5.812874  | 4.99756   |
| 3.9250717 | 4.606222  | 5.812874  | 4.99756   |
| 3.9250717 | 4.606222  | 5.812874  | 4.99756   |
| 3.9250717 | 4.606222  | 5.812874  | 4.99756   |
| 3.9250717 | 4.606222  | 5.812874  | 4.99756   |
| 3.9250717 | 4.606222  | 5.812874  | 4.99756   |
| 3.9250717 | 4.606222  | 5.812874  | 4.99756   |
| 6.243641  | 5.6087933 | 5.2541614 | 5.139229  |
| 2.6942596 | 2.3408759 | 4.0907717 | 3.777281  |
| 9.033111  | 7.596813  | 7.6121087 | 7.8150063 |
| 2.350709  | 2.3408759 | 2.3618152 | 2.352752  |
| 13.24231  | 12.895115 | 13.24231  | 13.123952 |
| 13.24231  | 12.895115 | 13.24231  | 13.123952 |
| 13.24231  | 12.895115 | 13.24231  | 13.123952 |
| 5.181766  | 5.6084337 | 5.474874  | 5.075396  |
| 5.062258  | 4.539161  | 4.910662  | 4.2974625 |
| 2.350709  | 2.3408759 | 4.807745  | 2.82977   |
| 4.414891  | 2.3408759 | 2.3618152 | 2.6540806 |
| 4.414891  | 2.3408759 | 2.3618152 | 2.6540806 |
| 5.632655  | 4.5590525 | 5.620453  | 5.12261   |
| 4.9511337 | 6.4932923 | 5.891892  | 5.9484196 |
| 8.853938  | 8.779891  | 9.450233  | 8.947453  |
| 6.6120257 | 7.1223617 | 6.890214  | 6.9530897 |
| 8.859375  | 10.16732  | 9.294022  | 9.747093  |
| 5.361157  | 6.411529  | 6.747841  | 5.968849  |
| 4.768921  | 6.4801035 | 5.2785006 | 5.8757806 |
| 4.768921  | 6.4801035 | 5.2785006 | 5.8757806 |
| 4.687648  | 2.3408759 | 4.2696924 | 3.7458546 |
| 4.687648  | 2.3408759 | 4.2696924 | 3.7458546 |
| 4.5132084 | 2.8253298 | 4.092942  | 3.657192  |
| 6.013214  | 5.501737  | 6.6669846 | 6.253614  |
| 6.013214  | 5.501737  | 6.6669846 | 6.253614  |
| 6.013214  | 5.501737  | 6.6669846 | 6.253614  |
| 2.350709  | 3.1107988 | 3.9557266 | 3.601798  |
| 7.283399  | 7.417538  | 8.093078  | 7.793617  |
| 3.8780541 | 2.9558587 | 2.8746185 | 2.8849473 |
| 5.216419  | 4.044402  | 5.1485267 | 4.711269  |
| 6.282127  | 3.6078851 | 6.44596   | 5.2286367 |
| 6.282127  | 3.6078851 | 6.44596   | 5.2286367 |
| 4.460197  | 4.0479074 | 5.045829  | 4.2774057 |
| 4.460197  | 4.0479074 | 5.045829  | 4.2774057 |
| 4.460197  | 4.0479074 | 5.045829  | 4.2774057 |
| 4.460197  | 4.0479074 | 5.045829  | 4.2774057 |
| 6.5756803 | 5.4061484 | 6.6632814 | 5.983465  |
| 2.6534348 | 4.1469755 | 2.3618152 | 3.7475839 |
| 4.265582  | 4.3616095 | 4.486859  | 4.215534  |
| 3.94055   | 4.862039  | 4.275234  | 4.795387  |
| 5.849493  | 4.47856   | 4.767035  | 4.165296  |
| 9.392478  | 7.058901  | 9.231916  | 8.551354  |
| 7.8266177 | 6.8089333 | 6.595763  | 6.5668297 |
| 6.5673504 | 3.5495846 | 5.1675377 | 4.4195194 |
| 7.9117007 | 8.349012  | 8.221882  | 8.249008  |

|               |             |             |           |    |           |
|---------------|-------------|-------------|-----------|----|-----------|
| ASHGA5P053428 | 0.00106613  | 0.022073729 | 2.5005624 | up | noncoding |
| ASHGA5P028909 | 0.008164325 | 0.056774037 | 2.5653112 | up | noncoding |
| ASHGA5P017314 | 7.4385E-05  | 0.008283845 | 4.2673309 | up | noncoding |
| ASHGA5P017314 | 7.4385E-05  | 0.008283845 | 4.2673309 | up | noncoding |
| ASHGA5P017314 | 7.4385E-05  | 0.008283845 | 4.2673309 | up | noncoding |
| ASHGA5P017314 | 7.4385E-05  | 0.008283845 | 4.2673309 | up | noncoding |
| ASHGA5P037205 | 0.00646773  | 0.051079512 | 2.0038158 | up | noncoding |
| ASHGA5P044291 | 0.000760308 | 0.018587813 | 3.0324053 | up | noncoding |
| ASHGA5P043947 | 0.028692464 | 0.105667631 | 2.3361488 | up | noncoding |
| ASHGA5P044812 | 0.000649252 | 0.017104871 | 2.2750788 | up | noncoding |
| ASHGA5P023027 | 0.003396129 | 0.037609468 | 2.263611  | up | noncoding |
| ASHGA5P023027 | 0.003396129 | 0.037609468 | 2.263611  | up | noncoding |
| ASHGA5P043168 | 0.043713437 | 0.134107741 | 2.4237495 | up | noncoding |
| ASHGA5P032708 | 0.000214693 | 0.01146874  | 4.8906477 | up | noncoding |
| ASHGA5P048186 | 1.09802E-05 | 0.004010044 | 2.580733  | up | noncoding |
| ASHGA5P048186 | 1.09802E-05 | 0.004010044 | 2.580733  | up | noncoding |
| ASHGA5P048186 | 1.09802E-05 | 0.004010044 | 2.580733  | up | noncoding |
| ASHGA5P018975 | 0.009806122 | 0.061453355 | 2.7206794 | up | noncoding |
| ASHGA5P001407 | 0.000205649 | 0.01146874  | 4.1006512 | up | noncoding |
| ASHGA5P001407 | 0.000205649 | 0.01146874  | 4.1006512 | up | noncoding |
| ASHGA5P001407 | 0.000205649 | 0.01146874  | 4.1006512 | up | noncoding |
| ASHGA5P001407 | 0.000205649 | 0.01146874  | 4.1006512 | up | noncoding |
| ASHGA5P001407 | 0.000205649 | 0.01146874  | 4.1006512 | up | noncoding |
| ASHGA5P047569 | 0.010279032 | 0.062647807 | 2.3350852 | up | noncoding |
| ASHGA5P050994 | 0.002245065 | 0.031214119 | 3.0277744 | up | noncoding |
| ASHGA5P056711 | 0.005723094 | 0.048087879 | 3.7674974 | up | noncoding |
| ASHGA5P028830 | 3.87651E-06 | 0.00279577  | 4.2629855 | up | noncoding |
| ASHGA5P043957 | 0.00476573  | 0.043854347 | 2.0343845 | up | noncoding |
| ASHGA5P018335 | 0.014165152 | 0.073080363 | 2.1123849 | up | noncoding |
| ASHGA5P047146 | 0.02063656  | 0.088218874 | 2.4173759 | up | noncoding |
| ASHGA5P047146 | 0.02063656  | 0.088218874 | 2.4173759 | up | noncoding |
| ASHGA5P019438 | 0.021010287 | 0.089265357 | 2.0465866 | up | noncoding |
| ASHGA5P019438 | 0.021010287 | 0.089265357 | 2.0465866 | up | noncoding |
| ASHGA5P019438 | 0.021010287 | 0.089265357 | 2.0465866 | up | noncoding |
| ASHGA5P019438 | 0.021010287 | 0.089265357 | 2.0465866 | up | noncoding |
| ASHGA5P031667 | 0.006856277 | 0.052487971 | 2.3190393 | up | noncoding |
| ASHGA5P031667 | 0.006856277 | 0.052487971 | 2.3190393 | up | noncoding |
| ASHGA5P031667 | 0.006856277 | 0.052487971 | 2.3190393 | up | noncoding |
| ASHGA5P035229 | 0.01953095  | 0.085195149 | 3.4446936 | up | noncoding |
| ASHGA5P037934 | 0.003457169 | 0.037897493 | 2.0521959 | up | noncoding |
| ASHGA5P008083 | 0.020704802 | 0.088426356 | 2.7967891 | up | noncoding |
| ASHGA5P008083 | 0.020704802 | 0.088426356 | 2.7967891 | up | noncoding |
| ASHGA5P008083 | 0.020704802 | 0.088426356 | 2.7967891 | up | noncoding |
| ASHGA5P008083 | 0.020704802 | 0.088426356 | 2.7967891 | up | noncoding |
| ASHGA5P035924 | 0.047887063 | 0.141761103 | 2.1330735 | up | noncoding |
| ASHGA5P035924 | 0.047887063 | 0.141761103 | 2.1330735 | up | noncoding |
| ASHGA5P035924 | 0.047887063 | 0.141761103 | 2.1330735 | up | noncoding |
| ASHGA5P035924 | 0.047887063 | 0.141761103 | 2.1330735 | up | noncoding |
| ASHGA5P033946 | 0.004958278 | 0.044652877 | 3.450651  | up | noncoding |
| ASHGA5P046096 | 5.71112E-07 | 0.001647562 | 4.4274091 | up | noncoding |
| ASHGA5P053422 | 0.000721097 | 0.018055047 | 5.1603983 | up | noncoding |
| ASHGA5P053422 | 0.000721097 | 0.018055047 | 5.1603983 | up | noncoding |
| ASHGA5P047956 | 0.004259838 | 0.041423336 | 3.6169862 | up | noncoding |
| ASHGA5P048191 | 0.030603896 | 0.109741627 | 8.9504249 | up | noncoding |
| ASHGA5P046995 | 0.000511648 | 0.015567285 | 2.260796  | up | noncoding |
| ASHGA5P028991 | 0.003726844 | 0.039190735 | 2.3083878 | up | noncoding |
| ASHGA5P028991 | 0.003726844 | 0.039190735 | 2.3083878 | up | noncoding |
| ASHGA5P028991 | 0.003726844 | 0.039190735 | 2.3083878 | up | noncoding |
| ASHGA5P030271 | 0.019926546 | 0.08624871  | 2.0537034 | up | noncoding |
| ASHGA5P026905 | 0.02833334  | 0.105047356 | 2.9864757 | up | noncoding |
| ASHGA5P041839 | 0.0022536   | 0.031214119 | 3.0884072 | up | noncoding |
| ASHGA5P020689 | 0.000448271 | 0.014950157 | 3.1609469 | up | noncoding |

|                 |               |                     |      |       |   |
|-----------------|---------------|---------------------|------|-------|---|
| ENST00000449589 | GAS5          | GENCODE             | 712  | chr1  | - |
| ENST00000562781 | RP11-122A8.4  | GENCODE             | 807  | chr13 | + |
| NR_037669       | GGCT          | RefSeq              | 1051 | chr7  | - |
| NR_037669       | GGCT          | RefSeq              | 1051 | chr7  | - |
| NR_037669       | GGCT          | RefSeq              | 1051 | chr7  | - |
| NR_037669       | GGCT          | RefSeq              | 1051 | chr7  | - |
| ENST00000416641 | AP000432.2    | GENCODE             | 516  | chr21 | - |
| ENST00000534670 | RP11-33111.2  | GENCODE             | 301  | chr8  | - |
| uc022amu.1      | BC065735      | UCSC_knowngene      | 1437 | chr7  | + |
| ENST00000521612 | RP11-110G21.1 | GENCODE             | 423  | chr8  | + |
| NR_045815       | ATF7IP2       | RefSeq              | 3451 | chr16 | + |
| NR_045815       | ATF7IP2       | RefSeq              | 3451 | chr16 | + |
| TCONS_00018358  | XLOC_008643   | LincRNAs identified | 413  | chr10 | + |
| TCONS_00029193  | XLOC_013852   | LincRNAs identified | 557  | chr21 | + |
| uc001nvs.3      | SNHG1         | UCSC_knowngene      | 1365 | chr11 | - |
| uc001nvs.3      | SNHG1         | UCSC_knowngene      | 1365 | chr11 | - |
| uc001nvs.3      | SNHG1         | UCSC_knowngene      | 1365 | chr11 | - |
| NR_051969       | MRPS2         | RefSeq              | 1719 | chr9  | + |
| NR_072998       | PTK7          | RefSeq              | 4040 | chr6  | + |
| NR_072998       | PTK7          | RefSeq              | 4040 | chr6  | + |
| NR_072998       | PTK7          | RefSeq              | 4040 | chr6  | + |
| NR_072998       | PTK7          | RefSeq              | 4040 | chr6  | + |
| NR_072998       | PTK7          | RefSeq              | 4040 | chr6  | + |
| TCONS_00014180  | XLOC_006188   | LincRNAs identified | 313  | chr7  | + |
| NR_038337       | LOC100505783  | RefSeq              | 1743 | chr20 | + |
| TCONS_00007988  | XLOC_003455   | LincRNAs identified | 372  | chr4  | + |
| NR_046551       | DLEU7-AS1     | RefSeq              | 1824 | chr13 | + |
| TCONS_00014730  | XLOC_006818   | LincRNAs identified | 278  | chr8  | + |
| ENST00000452249 | AC003075.4    | GENCODE             | 441  | chr7  | - |
| NR_033847       | FLJ37035      | RefSeq              | 2527 | chr10 | - |
| NR_033847       | FLJ37035      | RefSeq              | 2527 | chr10 | - |
| NR_046443       | CEP41         | RefSeq              | 6410 | chr7  | - |
| NR_046443       | CEP41         | RefSeq              | 6410 | chr7  | - |
| NR_046443       | CEP41         | RefSeq              | 6410 | chr7  | - |
| NR_046443       | CEP41         | RefSeq              | 6410 | chr7  | - |
| uc002dyu.3      | ZNF785        | UCSC_knowngene      | 1475 | chr16 | + |
| uc002dyu.3      | ZNF785        | UCSC_knowngene      | 1475 | chr16 | + |
| uc002dyu.3      | ZNF785        | UCSC_knowngene      | 1475 | chr16 | + |
| NR_046111       | LOC440894     | RefSeq              | 2334 | chr2  | - |
| ENST00000441558 | MORC2-AS1     | GENCODE             | 425  | chr22 | + |
| NR_049767       | SLC7A8        | RefSeq              | 3236 | chr14 | - |
| NR_049767       | SLC7A8        | RefSeq              | 3236 | chr14 | - |
| NR_049767       | SLC7A8        | RefSeq              | 3236 | chr14 | - |
| NR_049767       | SLC7A8        | RefSeq              | 3236 | chr14 | - |
| ENST00000434786 | ZNF638-IT1    | GENCODE             | 827  | chr2  | + |
| ENST00000434786 | ZNF638-IT1    | GENCODE             | 827  | chr2  | + |
| ENST00000434786 | ZNF638-IT1    | GENCODE             | 827  | chr2  | + |
| ENST00000434786 | ZNF638-IT1    | GENCODE             | 827  | chr2  | + |
| TCONS_00004010  | XLOC_001836   | LincRNAs identified | 347  | chr2  | + |
| uc011mhl.1      | AK097803      | UCSC_knowngene      | 1681 | chrX  | - |
| ENST00000458220 | GAS5          | GENCODE             | 469  | chr1  | - |
| ENST00000458220 | GAS5          | GENCODE             | 469  | chr1  | - |
| TCONS_00013475  | XLOC_006123   | LincRNAs identified | 2028 | chr7  | + |
| ENST00000447028 | AP003774.1    | GENCODE             | 672  | chr11 | - |
| ENST00000455699 | RP11-80H5.7   | GENCODE             | 667  | chr10 | - |
| ENST00000555983 | RP11-203M5.4  | GENCODE             | 334  | chr14 | - |
| ENST00000555983 | RP11-203M5.4  | GENCODE             | 334  | chr14 | - |
| ENST00000555983 | RP11-203M5.4  | GENCODE             | 334  | chr14 | - |
| ENST00000562894 | CTD-2313J17.5 | GENCODE             | 1736 | chr15 | - |
| BF969023        |               | LincRNAs identified | 778  | chr7  | - |
| ENST00000562471 | RP11-7K24.3   | GENCODE             | 2022 | chr6  | - |
| ENST00000518528 | PVT1          | GENCODE             | 624  | chr8  | + |

|           |           |                  |                            |                       |
|-----------|-----------|------------------|----------------------------|-----------------------|
| 173833153 | 173837127 | ENST00000416952, | CCATTGGATGTG(60674         | bidirectional         |
| 99740072  | 99740879  |                  | TTACCTTGGCTCTCTAAGCTGTATCT | intergenic            |
| 30536236  | 30544457  |                  | CCGCCTGCAGGC.79017         | exon sense-overlappi  |
| 30536236  | 30544457  |                  | CCGCCTGCAGGC.79017         | exon sense-overlappi  |
| 30536236  | 30544457  |                  | CCGCCTGCAGGC.79017         | exon sense-overlappi  |
| 30536236  | 30544457  |                  | CCGCCTGCAGGC.79017         | exon sense-overlappi  |
| 19031593  | 19032702  |                  | GAGCTAACATTATATGTCTCAGCAT( | intergenic            |
| 61721293  | 61722165  |                  | GCTTACAACAGAATCTACAAGGACA  | intronic antisense    |
| 140405000 | 140406437 |                  | ATGGATTTGAATTAGTGAATATAAA  | exon sense-overlappi  |
| 52812293  | 52824289  |                  | GACTGGTATTCTGTTATCCACAAGA  | bidirectional         |
| 10522724  | 10577495  |                  | GAGCCTCTAAGT/80063         | exon sense-overlappi  |
| 10522724  | 10577495  |                  | GAGCCTCTAAGT/80063         | exon sense-overlappi  |
| 122368119 | 122571581 |                  | AAGACAGATGGTGATGGATCAGAGC  | intergenic            |
| 9825743   | 9826389   | NR_046235        | CCGGGGGACCGGCCGCGACTGCGGC  | intergenic            |
| 62619459  | 62623217  | ENST00000541416, | CTTGCTTAGCCG123642         | bidirectional         |
| 62619459  | 62623217  | ENST00000541416, | CTTGCTTAGCCG123642         | bidirectional         |
| 62619459  | 62623217  | ENST00000541416, | CTTGCTTAGCCG123642         | bidirectional         |
| 138392476 | 138396519 |                  | CATGGATAGGAT'51116         | exon sense-overlappi  |
| 43044005  | 43129458  |                  | ACCACGCTGGGG.5754          | exon sense-overlappi  |
| 43044005  | 43129458  |                  | ACCACGCTGGGG.5754          | exon sense-overlappi  |
| 43044005  | 43129458  |                  | ACCACGCTGGGG.5754          | exon sense-overlappi  |
| 43044005  | 43129458  |                  | ACCACGCTGGGG.5754          | exon sense-overlappi  |
| 43044005  | 43129458  |                  | ACCACGCTGGGG.5754          | exon sense-overlappi  |
| 99597122  | 99609247  |                  | CATGCCCGGCCCTCCCTTTCTTTTGT | intergenic            |
| 42839725  | 42854667  |                  | AAGTGAAGAGGT100505783      | bidirectional         |
| 11315541  | 11352918  |                  | ATAACAAGGTGGACCTAAAAGTGGC  | intergenic            |
| 51381990  | 51424041  |                  | TGCTGTCTGTGC100874074      | intronic antisense    |
| 62718282  | 62722504  |                  | GTTCCCACAAAACAATTCAGATTGT( | intergenic            |
| 17325902  | 17338070  |                  | CATTTAACAGTGTGTGAACCACTT(  | bidirectional         |
| 127393858 | 127408062 |                  | CAGACTCGGGCA.399821        | bidirectional         |
| 127393858 | 127408062 |                  | CAGACTCGGGCA.399821        | bidirectional         |
| 130033611 | 130081051 |                  | GGAAATCCAGTG'95681         | exon sense-overlappi  |
| 130033611 | 130081051 |                  | GGAAATCCAGTG'95681         | exon sense-overlappi  |
| 130033611 | 130081051 |                  | GGAAATCCAGTG'95681         | exon sense-overlappi  |
| 130033611 | 130081051 |                  | GGAAATCCAGTG'95681         | exon sense-overlappi  |
| 30583575  | 30595168  |                  | TAAAAGCAAATGCCATGGTCTGCAG  | natural antisense     |
| 30583575  | 30595168  |                  | TAAAAGCAAATGCCATGGTCTGCAG  | natural antisense     |
| 30583575  | 30595168  |                  | TAAAAGCAAATGCCATGGTCTGCAG  | natural antisense     |
| 111133764 | 111142102 | NR_027244, NR_04 | ATGTGCTTGGTG'440894        | intergenic            |
| 31318435  | 31328436  |                  | TATTAGCTCATCI150291        | natural antisense     |
| 23594503  | 23624667  |                  | AACTTTCTGAATI23428         | exon sense-overlappi  |
| 23594503  | 23624667  |                  | AACTTTCTGAATI23428         | exon sense-overlappi  |
| 23594503  | 23624667  |                  | AACTTTCTGAATI23428         | exon sense-overlappi  |
| 23594503  | 23624667  |                  | AACTTTCTGAATI23428         | exon sense-overlappi  |
| 71601067  | 71602662  |                  | GGAATAAAAATG100507113      | intron sense-overlapp |
| 71601067  | 71602662  |                  | GGAATAAAAATG100507113      | intron sense-overlapp |
| 71601067  | 71602662  |                  | GGAATAAAAATG100507113      | intron sense-overlapp |
| 71601067  | 71602662  |                  | GGAATAAAAATG100507113      | intron sense-overlapp |
| 215674994 | 215698897 |                  | ATAAAAAGCGCTGTTTTGACTGCTG' | intergenic            |
| 3782438   | 3799884   | NR_034031        | ATCTCGACCTGCCAAGTATACAGCT. | intergenic            |
| 173835353 | 173837125 | ENST00000421068  | GAAAATGTGAAA60674          | bidirectional         |
| 173835353 | 173837125 | ENST00000421068  | GAAAATGTGAAA60674          | bidirectional         |
| 63831931  | 63836925  |                  | ATCGTGATAGTCATGTGATATAAAT' | intergenic            |
| 64092521  | 64096976  |                  | TGGAAACACCCAGCTCTCCACCAAG  | intergenic            |
| 91454051  | 91457685  |                  | GATATTTTCTGACTTGGGGATTAAT' | intergenic            |
| 20789321  | 20790303  |                  | GCACAACACTACTTGAAACTCAAA   | intron sense-overlapp |
| 20789321  | 20790303  |                  | GCACAACACTACTTGAAACTCAAA   | intron sense-overlapp |
| 20789321  | 20790303  |                  | GCACAACACTACTTGAAACTCAAA   | intron sense-overlapp |
| 93322986  | 93324722  |                  | GTACATTTAAAGAGGCAATGCTACT  | intron sense-overlapp |
| 127188015 | 127188758 |                  | GCCTTTGGTTTTTATCAGCAGAGCT( | intergenic            |
| 42059975  | 42061997  |                  | GAACCCAGTCACTTTGCTGTTTTTCT | intergenic            |
| 128808065 | 128903206 |                  | ATCCACTTACGC5820           | intergenic            |

|                 |           |                          |           |           |
|-----------------|-----------|--------------------------|-----------|-----------|
| NM_032522       | ZBTB37    | zinc finger and BTB +    | 173837492 | 173842778 |
| NM_001199815    | GGCT      | gamma-glutamylcycl -     | 30536236  | 30544457  |
| NM_001199816    | GGCT      | gamma-glutamylcycl -     | 30536236  | 30544457  |
| NM_001199817    | GGCT      | gamma-glutamylcycl -     | 30536236  | 30544457  |
| NM_024051       | GGCT      | gamma-glutamylcycl -     | 30536236  | 30544457  |
| NM_017780       | CHD7      | chromodomain-helic+      | 61591323  | 61780586  |
| NM_004546       | NDUFB2    | NADH dehydrogena+        | 140396480 | 140406446 |
| NM_052937       | PCMTD1    | protein-L-isoaspartat -  | 52730139  | 52811735  |
| NM_001256160    | ATF7IP2   | activating transcripti+  | 10479911  | 10577495  |
| NM_024997       | ATF7IP2   | activating transcripti+  | 10479911  | 10577495  |
| NM_001012662    | SLC3A2    | 4F2 cell-surface antiξ+  | 62623483  | 62656355  |
| NM_001012664    | SLC3A2    | 4F2 cell-surface antiξ+  | 62623483  | 62656355  |
| NM_002394       | SLC3A2    | 4F2 cell-surface antiξ+  | 62623483  | 62656355  |
| NM_016034       | MRPS2     | 28S ribosomal protei+    | 138392476 | 138396519 |
| NM_001270398    | PTK7      | inactive tyrosine-prot+  | 43044551  | 43129458  |
| NM_002821       | PTK7      | inactive tyrosine-prot+  | 43044005  | 43129458  |
| NM_152880       | PTK7      | inactive tyrosine-prot+  | 43044005  | 43129458  |
| NM_152881       | PTK7      | inactive tyrosine-prot+  | 43044005  | 43129458  |
| NM_152882       | PTK7      | inactive tyrosine-prot+  | 43044005  | 43129458  |
| NM_016470       | C20orf111 | uncharacterized prote -  | 42824580  | 42839546  |
| NM_198989       | DLEU7     | leukemia-associated j -  | 51286758  | 51417885  |
| NM_001621       | AHR       | aryl hydrocarbon reco+   | 17338275  | 17385775  |
| NM_001202438    | C10orf137 | erythroid differentiat + | 127408083 | 127452712 |
| NM_015608       | C10orf137 | erythroid differentiat + | 127408083 | 127452712 |
| NM_001257158    | CEP41     | centrosomal protein ( -  | 130033611 | 130081051 |
| NM_001257159    | CEP41     | centrosomal protein ( -  | 130033611 | 130081051 |
| NM_001257160    | CEP41     | centrosomal protein ( -  | 130058874 | 130081051 |
| NM_018718       | CEP41     | centrosomal protein ( -  | 130033611 | 130081051 |
| NM_001024683    | ZNF688    | zinc finger protein 6ξ - | 30581018  | 30583728  |
| NM_145271       | ZNF688    | zinc finger protein 6ξ - | 30581018  | 30583728  |
| NM_152458       | ZNF785    | zinc finger protein 7ξ - | 30591993  | 30597092  |
| NM_014941       | MORC2     | MORC family CW-ty-       | 31322599  | 31364187  |
| NM_001267036    | SLC7A8    | large neutral amino a -  | 23594503  | 23624667  |
| NM_001267037    | SLC7A8    | large neutral amino a -  | 23594503  | 23623659  |
| NM_012244       | SLC7A8    | large neutral amino a -  | 23594503  | 23652869  |
| NM_182728       | SLC7A8    | large neutral amino a -  | 23594503  | 23623659  |
| NM_001014972    | ZNF638    | zinc finger protein 6ζ+  | 71558884  | 71662191  |
| NM_001252612    | ZNF638    | zinc finger protein 6ζ+  | 71558884  | 71662191  |
| NM_001252613    | ZNF638    | zinc finger protein 6ζ+  | 71558884  | 71662191  |
| NM_014497       | ZNF638    | zinc finger protein 6ζ+  | 71558884  | 71662191  |
| NM_001122770    | ZBTB37    | zinc finger and BTB +    | 173837492 | 173855774 |
| NM_032522       | ZBTB37    | zinc finger and BTB +    | 173837492 | 173842778 |
| NM_021178       | CCNB1IP1  | E3 ubiquitin-protein -   | 20779526  | 20801471  |
| NM_182849       | CCNB1IP1  | E3 ubiquitin-protein -   | 20779526  | 20801471  |
| NM_182852       | CCNB1IP1  | E3 ubiquitin-protein -   | 20779526  | 20801471  |
| ENST00000557398 | FAM174B   | family with sequence -   | 93160677  | 93353028  |

|             |             |           |           |           |           |
|-------------|-------------|-----------|-----------|-----------|-----------|
| 825.74361   | 203.031225  | 9.278482  | 7.956229  | 801.2823  | 829.60156 |
| 1701.1838   | 395.091987  | 10.160354 | 8.80122   | 1559.7391 | 472.0801  |
| 12459.3775  | 1640.16715  | 13.179714 | 11.08638  | 12612.404 | 12825.018 |
| 12459.3775  | 1640.16715  | 13.179714 | 11.08638  | 12612.404 | 12825.018 |
| 12459.3775  | 1640.16715  | 13.179714 | 11.08638  | 12612.404 | 12825.018 |
| 12459.3775  | 1640.16715  | 13.179714 | 11.08638  | 12612.404 | 12825.018 |
| 17.046493   | 6.197176    | 3.758696  | 2.755946  | 21.663828 | 16.364216 |
| 31.726295   | 8.62177     | 4.629715  | 3.029252  | 40.688763 | 24.014835 |
| 1653.54529  | 443.805953  | 10.139641 | 8.915509  | 1348.6833 | 1176.5383 |
| 697.548048  | 179.279405  | 9.005878  | 7.819962  | 661.48035 | 800.53845 |
| 152.479415  | 42.004561   | 6.86576   | 5.687134  | 184.1532  | 189.74252 |
| 152.479415  | 42.004561   | 6.86576   | 5.687134  | 184.1532  | 189.74252 |
| 23.687829   | 7.253683    | 4.154574  | 2.877333  | 18.19171  | 23.637138 |
| 2532.772883 | 276.338843  | 10.766395 | 8.47637   | 3453.0452 | 4195.4473 |
| 202.088267  | 47.430938   | 7.213393  | 5.845612  | 212.11034 | 255.74612 |
| 202.088267  | 47.430938   | 7.213393  | 5.845612  | 212.11034 | 255.74612 |
| 202.088267  | 47.430938   | 7.213393  | 5.845612  | 212.11034 | 255.74612 |
| 220.96924   | 47.092114   | 7.271167  | 5.8272    | 252.5663  | 391.6752  |
| 65.241598   | 10.807662   | 5.656222  | 3.620369  | 63.60374  | 38.817352 |
| 65.241598   | 10.807662   | 5.656222  | 3.620369  | 63.60374  | 38.817352 |
| 65.241598   | 10.807662   | 5.656222  | 3.620369  | 63.60374  | 38.817352 |
| 65.241598   | 10.807662   | 5.656222  | 3.620369  | 63.60374  | 38.817352 |
| 65.241598   | 10.807662   | 5.656222  | 3.620369  | 63.60374  | 38.817352 |
| 3726.469917 | 1075.235358 | 11.387588 | 10.164113 | 4462.998  | 3947.2114 |
| 56.991465   | 11.834765   | 5.430553  | 3.832295  | 67.28365  | 52.315914 |
| 56.310564   | 7.841496    | 4.906133  | 2.992526  | 84.50533  | 133.12787 |
| 431.952717  | 61.556308   | 8.342922  | 6.251058  | 503.77542 | 582.11163 |
| 27.826795   | 9.945997    | 4.469963  | 3.445371  | 29.016083 | 28.462967 |
| 1040.751158 | 278.29057   | 9.546267  | 8.467394  | 1199.7701 | 652.85565 |
| 27.732859   | 7.652417    | 4.42545   | 3.152008  | 23.348965 | 22.455671 |
| 27.732859   | 7.652417    | 4.42545   | 3.152008  | 23.348965 | 22.455671 |
| 112.02536   | 35.563069   | 6.334668  | 5.301449  | 69.98947  | 96.229675 |
| 112.02536   | 35.563069   | 6.334668  | 5.301449  | 69.98947  | 96.229675 |
| 112.02536   | 35.563069   | 6.334668  | 5.301449  | 69.98947  | 96.229675 |
| 112.02536   | 35.563069   | 6.334668  | 5.301449  | 69.98947  | 96.229675 |
| 167.574742  | 49.350798   | 7.01194   | 5.798413  | 147.37535 | 159.58298 |
| 167.574742  | 49.350798   | 7.01194   | 5.798413  | 147.37535 | 159.58298 |
| 167.574742  | 49.350798   | 7.01194   | 5.798413  | 147.37535 | 159.58298 |
| 590.740377  | 117.377984  | 8.631553  | 6.847177  | 750.7848  | 1174.9979 |
| 14.300388   | 5.194731    | 3.512839  | 2.47567   | 11.935401 | 15.454501 |
| 121.495326  | 44.525064   | 6.54342   | 5.059649  | 141.32957 | 99.31362  |
| 121.495326  | 44.525064   | 6.54342   | 5.059649  | 141.32957 | 99.31362  |
| 121.495326  | 44.525064   | 6.54342   | 5.059649  | 141.32957 | 99.31362  |
| 121.495326  | 44.525064   | 6.54342   | 5.059649  | 141.32957 | 99.31362  |
| 26.815522   | 12.668986   | 4.389839  | 3.296905  | 37.281967 | 24.363056 |
| 26.815522   | 12.668986   | 4.389839  | 3.296905  | 37.281967 | 24.363056 |
| 26.815522   | 12.668986   | 4.389839  | 3.296905  | 37.281967 | 24.363056 |
| 26.815522   | 12.668986   | 4.389839  | 3.296905  | 37.281967 | 24.363056 |
| 31.630308   | 6.149413    | 4.459768  | 2.672899  | 33.32889  | 15.375878 |
| 129.938343  | 18.059789   | 6.556907  | 4.410444  | 131.01065 | 151.528   |
| 197.008993  | 24.082748   | 7.212518  | 4.845036  | 205.30688 | 200.8989  |
| 197.008993  | 24.082748   | 7.212518  | 4.845036  | 205.30688 | 200.8989  |
| 128.000104  | 16.957933   | 6.20771   | 4.352922  | 53.717533 | 61.22733  |
| 19585.21367 | 4717.65173  | 13.568235 | 10.406279 | 18195.207 | 26315.326 |
| 38.464026   | 12.501376   | 4.719597  | 3.542766  | 37.31334  | 10.8439   |
| 34.521923   | 10.703985   | 4.782125  | 3.575239  | 40.613953 | 31.35504  |
| 34.521923   | 10.703985   | 4.782125  | 3.575239  | 40.613953 | 31.35504  |
| 34.521923   | 10.703985   | 4.782125  | 3.575239  | 40.613953 | 31.35504  |
| 30.309166   | 8.995198    | 4.415139  | 3.376911  | 35.90104  | 55.8697   |
| 31.190591   | 7.937926    | 4.554173  | 2.975729  | 27.81531  | 32.371056 |
| 1082.393838 | 198.874326  | 9.571645  | 7.944782  | 708.8701  | 916.28467 |
| 50.27095    | 11.701212   | 5.257758  | 3.597401  | 41.295135 | 31.63467  |



|           |           |            |            |           |            |
|-----------|-----------|------------|------------|-----------|------------|
| 761.5928  | 1073.6698 | 571.1064   | 917.2088   | 179.47456 | 85.19255   |
| 2635.4375 | 2277.1072 | 1252.1665  | 2010.5724  | 470.7644  | 157.2321   |
| 13075.977 | 10097.15  | 12489.326  | 13656.39   | 1629.3751 | 1633.6287  |
| 13075.977 | 10097.15  | 12489.326  | 13656.39   | 1629.3751 | 1633.6287  |
| 13075.977 | 10097.15  | 12489.326  | 13656.39   | 1629.3751 | 1633.6287  |
| 13075.977 | 10097.15  | 12489.326  | 13656.39   | 1629.3751 | 1633.6287  |
| 13.424468 | 22.479576 | 11.192372  | 17.154497  | 8.0925    | 4.9999995  |
| 43.480194 | 24.260883 | 29.372347  | 28.54075   | 7.251314  | 4.9999995  |
| 1132.5747 | 2958.4392 | 822.35504  | 2482.6812  | 432.5055  | 97.46549   |
| 491.33533 | 429.3413  | 906.7261   | 895.86676  | 174.85469 | 126.0046   |
| 168.07314 | 104.52512 | 122.68971  | 145.6928   | 37.710308 | 28.80987   |
| 168.07314 | 104.52512 | 122.68971  | 145.6928   | 37.710308 | 28.80987   |
| 16.604858 | 15.674851 | 38.638176  | 29.380241  | 11.758828 | 4.9999995  |
| 2595.845  | 1134.5177 | 1900.6708  | 1917.1113  | 296.8642  | 337.05075  |
| 176.80753 | 88.62874  | 235.1849   | 244.05197  | 54.830853 | 51.690655  |
| 176.80753 | 88.62874  | 235.1849   | 244.05197  | 54.830853 | 51.690655  |
| 176.80753 | 88.62874  | 235.1849   | 244.05197  | 54.830853 | 51.690655  |
| 76.57335  | 176.00739 | 200.75426  | 228.23894  | 46.319977 | 29.2676    |
| 63.780384 | 91.10264  | 53.67909   | 80.46638   | 6.760025  | 6.187459   |
| 63.780384 | 91.10264  | 53.67909   | 80.46638   | 6.760025  | 6.187459   |
| 63.780384 | 91.10264  | 53.67909   | 80.46638   | 6.760025  | 6.187459   |
| 63.780384 | 91.10264  | 53.67909   | 80.46638   | 6.760025  | 6.187459   |
| 63.780384 | 91.10264  | 53.67909   | 80.46638   | 6.760025  | 6.187459   |
| 4356.679  | 1697.1542 | 3908.9146  | 3985.8623  | 1279.6835 | 785.37354  |
| 62.890537 | 73.29779  | 23.24101   | 62.91989   | 16.3573   | 11.470211  |
| 20.081306 | 62.443455 | 5.423503   | 32.281918  | 13.035229 | 14.01375   |
| 349.1288  | 442.31284 | 292.98676  | 421.40085  | 78.187164 | 76.21745   |
| 25.979181 | 39.1264   | 20.63496   | 23.74118   | 11.06412  | 5.8285155  |
| 1713.2244 | 1098.1117 | 637.69714  | 942.84796  | 240.0785  | 181.72707  |
| 28.313442 | 43.94608  | 15.447758  | 32.88524   | 11.806369 | 10.387799  |
| 28.313442 | 43.94608  | 15.447758  | 32.88524   | 11.806369 | 10.387799  |
| 56.897568 | 189.33176 | 95.84055   | 163.86314  | 24.570518 | 50.983227  |
| 56.897568 | 189.33176 | 95.84055   | 163.86314  | 24.570518 | 50.983227  |
| 56.897568 | 189.33176 | 95.84055   | 163.86314  | 24.570518 | 50.983227  |
| 56.897568 | 189.33176 | 95.84055   | 163.86314  | 24.570518 | 50.983227  |
| 129.3733  | 219.3759  | 140.63643  | 209.10449  | 37.12461  | 18.60728   |
| 129.3733  | 219.3759  | 140.63643  | 209.10449  | 37.12461  | 18.60728   |
| 129.3733  | 219.3759  | 140.63643  | 209.10449  | 37.12461  | 18.60728   |
| 221.53992 | 384.80814 | 480.23685  | 532.07465  | 169.64392 | 74.54604   |
| 11.21088  | 15.63277  | 13.675068  | 17.893711  | 5.1750097 | 4.9999995  |
| 171.83505 | 115.23037 | 83.82773   | 117.435616 | 69.1461   | 6.3400064  |
| 171.83505 | 115.23037 | 83.82773   | 117.435616 | 69.1461   | 6.3400064  |
| 171.83505 | 115.23037 | 83.82773   | 117.435616 | 69.1461   | 6.3400064  |
| 171.83505 | 115.23037 | 83.82773   | 117.435616 | 69.1461   | 6.3400064  |
| 32.36777  | 22.900667 | 16.407646  | 27.572025  | 18.047607 | 4.9999995  |
| 32.36777  | 22.900667 | 16.407646  | 27.572025  | 18.047607 | 4.9999995  |
| 32.36777  | 22.900667 | 16.407646  | 27.572025  | 18.047607 | 4.9999995  |
| 32.36777  | 22.900667 | 16.407646  | 27.572025  | 18.047607 | 4.9999995  |
| 67.25724  | 14.197629 | 32.664803  | 26.957405  | 4.9999995 | 4.9999995  |
| 92.57207  | 55.008816 | 179.86555  | 169.64497  | 16.450148 | 16.433687  |
| 174.1298  | 277.13382 | 104.297295 | 220.28726  | 25.13636  | 15.814638  |
| 174.1298  | 277.13382 | 104.297295 | 220.28726  | 25.13636  | 15.814638  |
| 49.05279  | 322.2778  | 54.906803  | 226.81837  | 13.041719 | 18.338121  |
| 12869.161 | 3774.906  | 31341.264  | 25015.418  | 6038.5444 | 433.13522  |
| 44.204994 | 20.467611 | 60.52738   | 57.426933  | 9.625355  | 4.9999995  |
| 29.693241 | 43.554787 | 26.59059   | 35.32393   | 7.53261   | 9.102055   |
| 29.693241 | 43.554787 | 26.59059   | 35.32393   | 7.53261   | 9.102055   |
| 29.693241 | 43.554787 | 26.59059   | 35.32393   | 7.53261   | 9.102055   |
| 23.954208 | 12.148489 | 32.314346  | 21.667215  | 9.459971  | 9.30306    |
| 14.475799 | 44.224705 | 23.683372  | 44.573303  | 8.164168  | 4.9999995  |
| 491.27686 | 1631.438  | 1165.104   | 1581.3894  | 196.50238 | 113.838394 |
| 44.12847  | 85.780106 | 38.339745  | 60.447575  | 10.133159 | 4.9999995  |

|           |           |           |           |           |           |
|-----------|-----------|-----------|-----------|-----------|-----------|
| 249.72124 | 243.39584 | 249.6204  | 210.78276 | 9.185014  | 9.365079  |
| 771.93    | 210.2297  | 461.10617 | 299.28955 | 10.142613 | 8.573693  |
| 1546.2723 | 1660.5417 | 1988.9777 | 1382.2074 | 13.172068 | 13.186595 |
| 1546.2723 | 1660.5417 | 1988.9777 | 1382.2074 | 13.172068 | 13.186595 |
| 1546.2723 | 1660.5417 | 1988.9777 | 1382.2074 | 13.172068 | 13.186595 |
| 1546.2723 | 1660.5417 | 1988.9777 | 1382.2074 | 13.172068 | 13.186595 |
| 4.9999995 | 4.9999995 | 7.0521727 | 7.038385  | 3.9766154 | 4.045346  |
| 18.39262  | 4.9999995 | 11.08669  | 4.9999995 | 4.883735  | 4.542522  |
| 875.41876 | 409.02667 | 511.0799  | 337.3394  | 9.932707  | 9.8462105 |
| 227.89053 | 173.04446 | 219.28384 | 154.59831 | 8.89629   | 9.313969  |
| 40.693848 | 47.206123 | 60.84315  | 36.764065 | 7.06817   | 7.3247967 |
| 40.693848 | 47.206123 | 60.84315  | 36.764065 | 7.06817   | 7.3247967 |
| 8.969156  | 7.7941136 | 4.9999995 | 4.9999995 | 3.7158005 | 4.5212617 |
| 243.69601 | 236.75803 | 303.62207 | 240.042   | 11.276378 | 11.602852 |
| 51.035896 | 26.919378 | 60.107094 | 40.001755 | 7.277364  | 7.732756  |
| 51.035896 | 26.919378 | 60.107094 | 40.001755 | 7.277364  | 7.732756  |
| 51.035896 | 26.919378 | 60.107094 | 40.001755 | 7.277364  | 7.732756  |
| 63.99704  | 41.79404  | 64.296364 | 36.87766  | 7.5219345 | 8.319926  |
| 8.511949  | 13.076821 | 11.09667  | 19.21305  | 5.533642  | 5.178852  |
| 8.511949  | 13.076821 | 11.09667  | 19.21305  | 5.533642  | 5.178852  |
| 8.511949  | 13.076821 | 11.09667  | 19.21305  | 5.533642  | 5.178852  |
| 8.511949  | 13.076821 | 11.09667  | 19.21305  | 5.533642  | 5.178852  |
| 8.511949  | 13.076821 | 11.09667  | 19.21305  | 5.533642  | 5.178852  |
| 2719.3608 | 648.52856 | 598.2824  | 420.18335 | 11.638906 | 11.534537 |
| 12.49518  | 8.662658  | 11.551481 | 10.47176  | 5.6117983 | 5.5721846 |
| 4.9999995 | 4.9999995 | 4.9999995 | 4.9999995 | 5.94795   | 6.8243346 |
| 62.256153 | 55.456326 | 53.901375 | 43.319378 | 8.493938  | 8.8755    |
| 15.443761 | 13.102739 | 9.236846  | 4.9999995 | 4.4060326 | 4.773078  |
| 288.6321  | 324.06927 | 355.75095 | 279.48553 | 9.751583  | 9.028195  |
| 7.593409  | 4.9999995 | 5.520022  | 5.6069036 | 4.0836406 | 4.4502254 |
| 7.593409  | 4.9999995 | 5.520022  | 5.6069036 | 4.0836406 | 4.4502254 |
| 9.011126  | 56.612213 | 34.516193 | 37.68514  | 5.6704035 | 6.3725333 |
| 9.011126  | 56.612213 | 34.516193 | 37.68514  | 5.6704035 | 6.3725333 |
| 9.011126  | 56.612213 | 34.516193 | 37.68514  | 5.6704035 | 6.3725333 |
| 9.011126  | 56.612213 | 34.516193 | 37.68514  | 5.6704035 | 6.3725333 |
| 44.51141  | 44.940342 | 93.29019  | 57.630955 | 6.7483788 | 7.076006  |
| 44.51141  | 44.940342 | 93.29019  | 57.630955 | 6.7483788 | 7.076006  |
| 44.51141  | 44.940342 | 93.29019  | 57.630955 | 6.7483788 | 7.076006  |
| 286.77954 | 38.769627 | 83.001434 | 51.527344 | 9.085781  | 9.844387  |
| 5.9933796 | 4.9999995 | 4.9999995 | 4.9999995 | 3.0915568 | 3.9699037 |
| 133.44121 | 21.447947 | 18.825071 | 17.95005  | 6.6916122 | 6.4187746 |
| 133.44121 | 21.447947 | 18.825071 | 17.95005  | 6.6916122 | 6.4187746 |
| 133.44121 | 21.447947 | 18.825071 | 17.95005  | 6.6916122 | 6.4187746 |
| 133.44121 | 21.447947 | 18.825071 | 17.95005  | 6.6916122 | 6.4187746 |
| 36.152893 | 4.9999995 | 6.8134203 | 4.9999995 | 4.7549224 | 4.5640707 |
| 36.152893 | 4.9999995 | 6.8134203 | 4.9999995 | 4.7549224 | 4.5640707 |
| 36.152893 | 4.9999995 | 6.8134203 | 4.9999995 | 4.7549224 | 4.5640707 |
| 36.152893 | 4.9999995 | 6.8134203 | 4.9999995 | 4.7549224 | 4.5640707 |
| 4.9999995 | 4.9999995 | 10.878571 | 6.017909  | 4.596338  | 3.9625843 |
| 19.406027 | 9.698637  | 26.809206 | 19.561028 | 6.586121  | 7.0080676 |
| 27.769058 | 17.214935 | 34.97294  | 23.588556 | 7.228572  | 7.4005375 |
| 27.769058 | 17.214935 | 34.97294  | 23.588556 | 7.228572  | 7.4005375 |
| 12.06175  | 26.392262 | 14.537931 | 17.375818 | 5.278879  | 5.77373   |
| 20749.883 | 144.43178 | 699.832   | 240.08398 | 13.695072 | 14.284758 |
| 23.606876 | 4.9999995 | 20.58204  | 11.193989 | 4.7567625 | 3.5049899 |
| 17.915028 | 16.75135  | 5.970731  | 6.9521337 | 4.8806825 | 4.9009495 |
| 17.915028 | 16.75135  | 5.970731  | 6.9521337 | 4.8806825 | 4.9009495 |
| 17.915028 | 16.75135  | 5.970731  | 6.9521337 | 4.8806825 | 4.9009495 |
| 4.9999995 | 8.54564   | 14.164751 | 7.497767  | 4.7030597 | 5.652783  |
| 15.009358 | 4.9999995 | 9.454034  | 4.9999995 | 4.345584  | 4.942521  |
| 294.18243 | 235.8638  | 181.8476  | 171.01135 | 9.000512  | 9.504933  |
| 7.6389136 | 22.217678 | 10.789061 | 14.428459 | 4.905142  | 4.910768  |

|           |           |           |           |           |           |
|-----------|-----------|-----------|-----------|-----------|-----------|
| 9.222115  | 9.747093  | 8.899571  | 9.252018  | 7.7407985 | 7.264973  |
| 11.007731 | 10.828189 | 10.020022 | 10.389878 | 9.14473   | 8.145644  |
| 13.375594 | 12.941439 | 13.278634 | 13.123952 | 10.972676 | 11.56372  |
| 13.375594 | 12.941439 | 13.278634 | 13.123952 | 10.972676 | 11.56372  |
| 13.375594 | 12.941439 | 13.278634 | 13.123952 | 10.972676 | 11.56372  |
| 13.375594 | 12.941439 | 13.278634 | 13.123952 | 10.972676 | 11.56372  |
| 3.4193892 | 3.99515   | 3.437369  | 3.678304  | 3.2188282 | 2.4279919 |
| 5.1194477 | 4.1164303 | 4.7363424 | 4.3798122 | 3.0516148 | 2.4279919 |
| 9.772156  | 11.193256 | 9.419062  | 10.674453 | 9.020102  | 7.461958  |
| 8.590928  | 8.437454  | 9.573069  | 9.223558  | 7.702283  | 7.826035  |
| 7.0632067 | 6.357002  | 6.717967  | 6.6634164 | 5.4737206 | 5.686953  |
| 7.0632067 | 6.357002  | 6.717967  | 6.6634164 | 5.4737206 | 5.686953  |
| 3.7368288 | 3.4152188 | 5.116016  | 4.422317  | 3.7850182 | 2.4279919 |
| 10.984496 | 9.824013  | 10.588401 | 10.322233 | 8.479207  | 9.258244  |
| 7.1370745 | 6.1149616 | 7.6329484 | 7.3852534 | 6.0119452 | 6.5408387 |
| 7.1370745 | 6.1149616 | 7.6329484 | 7.3852534 | 6.0119452 | 6.5408387 |
| 7.1370745 | 6.1149616 | 7.6329484 | 7.3852534 | 6.0119452 | 6.5408387 |
| 5.9435587 | 7.1363106 | 7.4132276 | 7.2920423 | 5.761828  | 5.710879  |
| 5.6903105 | 6.1562243 | 5.5615935 | 5.816707  | 2.9538639 | 3.380406  |
| 5.6903105 | 6.1562243 | 5.5615935 | 5.816707  | 2.9538639 | 3.380406  |
| 5.6903105 | 6.1562243 | 5.5615935 | 5.816707  | 2.9538639 | 3.380406  |
| 5.6903105 | 6.1562243 | 5.5615935 | 5.816707  | 2.9538639 | 3.380406  |
| 5.6903105 | 6.1562243 | 5.5615935 | 5.816707  | 2.9538639 | 3.380406  |
| 11.745006 | 10.419105 | 11.625542 | 11.362432 | 10.616147 | 10.476458 |
| 5.6672378 | 5.8350544 | 4.4284105 | 5.468632  | 4.2623553 | 4.310388  |
| 4.0064034 | 5.5890093 | 2.511003  | 4.558096  | 3.9295127 | 4.6194925 |
| 8.108717  | 8.479794  | 7.9522905 | 8.147293  | 6.510647  | 7.0997066 |
| 4.3896694 | 4.867869  | 4.26334   | 4.1197896 | 3.6976042 | 3.2838042 |
| 10.374961 | 9.776578  | 9.048699  | 9.2975855 | 8.161489  | 8.3553    |
| 4.5133567 | 5.0476193 | 3.8734958 | 4.5843635 | 3.7902727 | 4.1622868 |
| 4.5133567 | 5.0476193 | 3.8734958 | 4.5843635 | 3.7902727 | 4.1622868 |
| 5.5177927 | 7.2434807 | 6.370657  | 6.833143  | 4.8611603 | 6.5200653 |
| 5.5177927 | 7.2434807 | 6.370657  | 6.833143  | 4.8611603 | 6.5200653 |
| 5.5177927 | 7.2434807 | 6.370657  | 6.833143  | 4.8611603 | 6.5200653 |
| 5.5177927 | 7.2434807 | 6.370657  | 6.833143  | 4.8611603 | 6.5200653 |
| 6.693942  | 7.4663982 | 6.9156675 | 7.1712484 | 5.450808  | 5.0393906 |
| 6.693942  | 7.4663982 | 6.9156675 | 7.1712484 | 5.450808  | 5.0393906 |
| 6.693942  | 7.4663982 | 6.9156675 | 7.1712484 | 5.450808  | 5.0393906 |
| 7.468946  | 8.268391  | 8.644871  | 8.47694   | 7.651517  | 7.0639057 |
| 3.16072   | 3.4102354 | 3.7047482 | 3.7398686 | 2.5838494 | 2.4279919 |
| 7.0961413 | 6.515286  | 6.1856904 | 6.353018  | 6.344431  | 3.4162364 |
| 7.0961413 | 6.515286  | 6.1856904 | 6.353018  | 6.344431  | 3.4162364 |
| 7.0961413 | 6.515286  | 6.1856904 | 6.353018  | 6.344431  | 3.4162364 |
| 7.0961413 | 6.515286  | 6.1856904 | 6.353018  | 6.344431  | 3.4162364 |
| 4.705545  | 4.02563   | 3.95918   | 4.3296833 | 4.4112144 | 2.4279919 |
| 4.705545  | 4.02563   | 3.95918   | 4.3296833 | 4.4112144 | 2.4279919 |
| 4.705545  | 4.02563   | 3.95918   | 4.3296833 | 4.4112144 | 2.4279919 |
| 4.705545  | 4.02563   | 3.95918   | 4.3296833 | 4.4112144 | 2.4279919 |
| 5.7634716 | 3.2532878 | 4.886387  | 4.2965393 | 2.3467326 | 2.4279919 |
| 6.2101474 | 5.3941956 | 7.261121  | 6.8817887 | 4.2717    | 4.8537564 |
| 7.1133122 | 7.7986    | 6.4917765 | 7.242311  | 4.8944025 | 4.8016486 |
| 7.1133122 | 7.7986    | 6.4917765 | 7.242311  | 4.8944025 | 4.8016486 |
| 5.301098  | 8.011875  | 5.5957165 | 7.284961  | 3.93022   | 5.0198116 |
| 13.349262 | 11.538073 | 14.559727 | 13.982518 | 12.856338 | 9.628041  |
| 5.1468153 | 3.8366914 | 5.729191  | 5.34313   | 3.488935  | 2.4279919 |
| 4.583099  | 5.0343432 | 4.6118298 | 4.681844  | 3.1078713 | 3.961549  |
| 4.583099  | 5.0343432 | 4.6118298 | 4.681844  | 3.1078713 | 3.961549  |
| 4.583099  | 5.0343432 | 4.6118298 | 4.681844  | 3.1078713 | 3.961549  |
| 4.27495   | 2.9949439 | 4.8701854 | 3.9949098 | 3.4596407 | 3.99287   |
| 3.5303166 | 5.0560074 | 4.4563026 | 4.994309  | 3.2322395 | 2.4279919 |
| 8.590663  | 10.367367 | 9.923487  | 10.042907 | 7.864052  | 7.682559  |
| 5.1439953 | 6.067602  | 5.1070495 | 5.41199   | 3.5656352 | 2.4279919 |

|           |           |           |           |
|-----------|-----------|-----------|-----------|
| 7.9117007 | 8.349012  | 8.221882  | 8.249008  |
| 9.540466  | 8.121112  | 9.090699  | 8.764672  |
| 10.53186  | 11.214787 | 11.215674 | 11.019561 |
| 10.53186  | 11.214787 | 11.215674 | 11.019561 |
| 10.53186  | 11.214787 | 11.215674 | 11.019561 |
| 10.53186  | 11.214787 | 11.215674 | 11.019561 |
| 2.350709  | 2.3408759 | 3.1192646 | 3.0780046 |
| 4.2551594 | 2.3408759 | 3.7471201 | 2.352752  |
| 9.719757  | 9.126838  | 9.2286625 | 8.935734  |
| 7.774795  | 7.813798  | 8.030203  | 7.772655  |
| 5.3448844 | 5.8199954 | 6.191412  | 5.605837  |
| 5.3448844 | 5.8199954 | 6.191412  | 5.605837  |
| 3.2858248 | 3.050597  | 2.3618152 | 2.352752  |
| 7.8780603 | 8.306798  | 8.4931555 | 8.442755  |
| 5.667463  | 4.947808  | 6.173862  | 5.7317557 |
| 5.667463  | 4.947808  | 6.173862  | 5.7317557 |
| 5.667463  | 4.947808  | 6.173862  | 5.7317557 |
| 5.9823585 | 5.6239634 | 6.273701  | 5.610468  |
| 3.2147503 | 3.82942   | 3.7484207 | 4.5953503 |
| 3.2147503 | 3.82942   | 3.7484207 | 4.5953503 |
| 3.2147503 | 3.82942   | 3.7484207 | 4.5953503 |
| 3.2147503 | 3.82942   | 3.7484207 | 4.5953503 |
| 3.2147503 | 3.82942   | 3.7484207 | 4.5953503 |
| 11.358265 | 9.810787  | 9.46278   | 9.26024   |
| 3.7250936 | 3.2128968 | 3.8028843 | 3.6801534 |
| 2.350709  | 2.3408759 | 2.3618152 | 2.352752  |
| 5.9459763 | 6.0743933 | 6.0185604 | 5.857064  |
| 4.0126276 | 3.8323848 | 3.4930515 | 2.352752  |
| 8.12084   | 8.788202  | 8.711066  | 8.667468  |
| 3.0675511 | 2.3408759 | 2.800991  | 2.750073  |
| 3.0675511 | 2.3408759 | 2.800991  | 2.750073  |
| 3.2910297 | 6.109677  | 5.3836217 | 5.643138  |
| 3.2910297 | 6.109677  | 5.3836217 | 5.643138  |
| 3.2910297 | 6.109677  | 5.3836217 | 5.643138  |
| 3.2910297 | 6.109677  | 5.3836217 | 5.643138  |
| 5.4737206 | 5.740714  | 6.7972956 | 6.2885485 |
| 5.4737206 | 5.740714  | 6.7972956 | 6.2885485 |
| 5.4737206 | 5.740714  | 6.7972956 | 6.2885485 |
| 8.110173  | 5.5130763 | 6.629179  | 6.115211  |
| 2.7867377 | 2.3408759 | 2.3618152 | 2.352752  |
| 7.0150757 | 4.5892787 | 4.5012565 | 4.4916153 |
| 7.0150757 | 4.5892787 | 4.5012565 | 4.4916153 |
| 7.0150757 | 4.5892787 | 4.5012565 | 4.4916153 |
| 7.0150757 | 4.5892787 | 4.5012565 | 4.4916153 |
| 5.178852  | 2.3408759 | 3.0697432 | 2.352752  |
| 5.178852  | 2.3408759 | 3.0697432 | 2.352752  |
| 5.178852  | 2.3408759 | 3.0697432 | 2.352752  |
| 5.178852  | 2.3408759 | 3.0697432 | 2.352752  |
| 2.350709  | 2.3408759 | 3.7196598 | 2.8514273 |
| 4.3253593 | 3.3757267 | 5.0138154 | 4.6223073 |
| 4.815949  | 4.247795  | 5.4017715 | 4.908648  |
| 4.815949  | 4.247795  | 5.4017715 | 4.908648  |
| 3.6791968 | 4.913923  | 4.1334805 | 4.440899  |
| 14.27892  | 7.547723  | 9.683542  | 8.443109  |
| 4.5898705 | 2.3408759 | 4.6292048 | 3.7797172 |
| 4.2156496 | 4.2087736 | 2.9000905 | 3.0575004 |
| 4.2156496 | 4.2087736 | 2.9000905 | 3.0575004 |
| 4.2156496 | 4.2087736 | 2.9000905 | 3.0575004 |
| 2.350709  | 3.1897757 | 4.0952086 | 3.1732607 |
| 3.9723628 | 2.3408759 | 3.5281546 | 2.352752  |
| 8.14705   | 8.299048  | 7.7542386 | 7.9217434 |
| 3.0746772 | 4.64349   | 3.7086086 | 4.164003  |

|               |             |             |           |    |           |
|---------------|-------------|-------------|-----------|----|-----------|
| ASHGA5P015436 | 0.010252899 | 0.062647807 | 2.0902879 | up | noncoding |
| ASHGA5P015436 | 0.010252899 | 0.062647807 | 2.0902879 | up | noncoding |
| ASHGA5P050237 | 0.000142128 | 0.01066938  | 2.3097321 | up | noncoding |
| ASHGA5P000074 | 0.013710383 | 0.071739124 | 2.4234183 | up | noncoding |
| ASHGA5P036086 | 0.012810114 | 0.069277826 | 4.5445675 | up | noncoding |
| ASHGA5P032843 | 0.032597157 | 0.113617438 | 2.7061136 | up | noncoding |
| ASHGA5P035875 | 0.036365146 | 0.120940502 | 2.2344407 | up | noncoding |
| ASHGA5P042992 | 0.026720197 | 0.102009237 | 3.3727194 | up | noncoding |
| ASHGA5P042992 | 0.026720197 | 0.102009237 | 3.3727194 | up | noncoding |
| ASHGA5P057927 | 0.028296362 | 0.104997102 | 2.0423313 | up | noncoding |
| ASHGA5P046415 | 0.000757172 | 0.018563586 | 3.2987685 | up | noncoding |
| ASHGA5P044513 | 0.002951313 | 0.035133618 | 2.7100801 | up | noncoding |
| ASHGA5P056802 | 0.009123956 | 0.059505105 | 3.6781161 | up | noncoding |
| ASHGA5P030874 | 0.030508161 | 0.109579945 | 2.2714207 | up | noncoding |
| ASHGA5P030874 | 0.030508161 | 0.109579945 | 2.2714207 | up | noncoding |
| ASHGA5P032809 | 0.02060528  | 0.088106916 | 2.8314136 | up | noncoding |
| ASHGA5P022044 | 0.007162456 | 0.053397886 | 7.5916499 | up | noncoding |
| ASHGA5P041189 | 0.008699746 | 0.058118065 | 2.3753054 | up | noncoding |
| ASHGA5P041189 | 0.008699746 | 0.058118065 | 2.3753054 | up | noncoding |
| ASHGA5P041189 | 0.008699746 | 0.058118065 | 2.3753054 | up | noncoding |
| ASHGA5P051267 | 0.026661106 | 0.101899297 | 2.8254555 | up | noncoding |
| ASHGA5P051267 | 0.026661106 | 0.101899297 | 2.8254555 | up | noncoding |
| ASHGA5P047797 | 0.040943416 | 0.129322917 | 2.1161484 | up | noncoding |
| ASHGA5P028100 | 0.015331165 | 0.075787682 | 2.0836718 | up | noncoding |
| ASHGA5P052634 | 0.000363467 | 0.013588019 | 2.3897516 | up | noncoding |
| ASHGA5P019912 | 0.034011842 | 0.116461123 | 2.1379758 | up | noncoding |
| ASHGA5P048846 | 0.010428192 | 0.063044889 | 2.8300143 | up | noncoding |
| ASHGA5P043501 | 0.000122736 | 0.010164781 | 3.5583795 | up | noncoding |
| ASHGA5P047776 | 0.002583449 | 0.032855929 | 3.6666333 | up | noncoding |
| ASHGA5P044346 | 0.004213678 | 0.041275918 | 5.4155744 | up | noncoding |
| ASHGA5P021486 | 0.047907502 | 0.141797358 | 2.7635082 | up | noncoding |
| ASHGA5P021486 | 0.047907502 | 0.141797358 | 2.7635082 | up | noncoding |
| ASHGA5P021486 | 0.047907502 | 0.141797358 | 2.7635082 | up | noncoding |
| ASHGA5P021486 | 0.047907502 | 0.141797358 | 2.7635082 | up | noncoding |
| ASHGA5P021486 | 0.047907502 | 0.141797358 | 2.7635082 | up | noncoding |
| ASHGA5P021486 | 0.047907502 | 0.141797358 | 2.7635082 | up | noncoding |
| ASHGA5P021486 | 0.047907502 | 0.141797358 | 2.7635082 | up | noncoding |
| ASHGA5P045509 | 0.025585823 | 0.099699462 | 2.9112901 | up | noncoding |
| ASHGA5P015035 | 3.29657E-06 | 0.002593655 | 8.1472203 | up | noncoding |
| ASHGA5P048324 | 0.004845522 | 0.044259175 | 3.3572189 | up | noncoding |
| ASHGA5P037069 | 0.007138524 | 0.053350909 | 2.3519455 | up | noncoding |
| ASHGA5P037069 | 0.007138524 | 0.053350909 | 2.3519455 | up | noncoding |
| ASHGA5P037069 | 0.007138524 | 0.053350909 | 2.3519455 | up | noncoding |
| ASHGA5P037069 | 0.007138524 | 0.053350909 | 2.3519455 | up | noncoding |
| ASHGA5P036158 | 0.006046957 | 0.049581613 | 3.8140123 | up | noncoding |
| ASHGA5P036914 | 0.044787079 | 0.135994806 | 2.3963826 | up | noncoding |
| ASHGA5P029948 | 0.037618802 | 0.123112847 | 2.4463559 | up | noncoding |
| ASHGA5P022604 | 0.003321461 | 0.037316455 | 3.02233   | up | noncoding |
| ASHGA5P021124 | 0.002049313 | 0.029808035 | 2.5271184 | up | noncoding |
| ASHGA5P031778 | 0.002021734 | 0.029606317 | 5.9189865 | up | noncoding |
| ASHGA5P035667 | 0.002468712 | 0.032298511 | 2.0797308 | up | noncoding |
| ASHGA5P044557 | 0.007660217 | 0.054952989 | 2.2094682 | up | noncoding |
| ASHGA5P031306 | 0.003991383 | 0.040472675 | 2.2649687 | up | noncoding |
| ASHGA5P031306 | 0.003991383 | 0.040472675 | 2.2649687 | up | noncoding |
| ASHGA5P048259 | 0.000868903 | 0.01986768  | 2.2106774 | up | noncoding |
| ASHGA5P048259 | 0.000868903 | 0.01986768  | 2.2106774 | up | noncoding |
| ASHGA5P048259 | 0.000868903 | 0.01986768  | 2.2106774 | up | noncoding |
| ASHGA5P026748 | 0.039959444 | 0.127780027 | 2.1582883 | up | noncoding |
| ASHGA5P041623 | 0.013025716 | 0.069856339 | 2.3539673 | up | noncoding |
| ASHGA5P043928 | 0.000386817 | 0.014011107 | 3.2534005 | up | noncoding |
| ASHGA5P048981 | 0.000204465 | 0.01146874  | 2.2958989 | up | noncoding |
| ASHGA5P048981 | 0.000204465 | 0.01146874  | 2.2958989 | up | noncoding |
| ASHGA5P048981 | 0.000204465 | 0.01146874  | 2.2958989 | up | noncoding |

|                 |               |                     |      |       |   |
|-----------------|---------------|---------------------|------|-------|---|
| NR_026879       | FAM185A       | RefSeq              | 2055 | chr7  | + |
| NR_026879       | FAM185A       | RefSeq              | 2055 | chr7  | + |
| ENST00000575148 | APOC1P1       | GENCODE             | 560  | chr19 | + |
| AV648285        |               | LincRNAs identified | 390  | chr12 | - |
| uc002tji.1      | AK123617      | UCSC_knowngene      | 3471 | chr2  | + |
| ENST00000428642 | RP11-496N12.6 | GENCODE             | 397  | chr1  | - |
| TCONS_00026909  | XLOC_012981   | LincRNAs identified | 600  | chr19 | + |
| ENST00000439852 | NPSR1-AS1     | GENCODE             | 710  | chr7  | - |
| ENST00000439852 | NPSR1-AS1     | GENCODE             | 710  | chr7  | - |
| TCONS_00023843  | XLOC_011616   | LincRNAs identified | 3947 | chr15 | - |
| ENST00000399966 | WASIR1        | GENCODE             | 1054 | chrX  | - |
| ENST00000530778 | RP11-383J24.5 | GENCODE             | 1767 | chr8  | - |
| TCONS_00008755  | XLOC_003455   | LincRNAs identified | 210  | chr4  | + |
| ENST00000565937 | RP11-304L19.3 | GENCODE             | 596  | chr16 | - |
| ENST00000565937 | RP11-304L19.3 | GENCODE             | 596  | chr16 | - |
| TCONS_00029013  | XLOC_013936   | LincRNAs identified | 815  | chr21 | + |
| ENST00000547779 | AL589743.1    | GENCODE             | 617  | chr14 | + |
| ENST00000457548 | RP11-98D18.1  | GENCODE             | 386  | chr1  | + |
| ENST00000457548 | RP11-98D18.1  | GENCODE             | 386  | chr1  | + |
| ENST00000457548 | RP11-98D18.1  | GENCODE             | 386  | chr1  | + |
| ENST00000566814 | CTA-445C9.14  | GENCODE             | 2032 | chr22 | + |
| ENST00000566814 | CTA-445C9.14  | GENCODE             | 2032 | chr22 | + |
| ENST00000525893 | RP13-317D12.3 | GENCODE             | 664  | chr11 | - |
| TCONS_00017110  | XLOC_007908   | LincRNAs identified | 863  | chrX  | + |
| ENST00000455957 | HCG17         | GENCODE             | 350  | chr6  | - |
| ENST00000506340 | CTC-338M12.4  | GENCODE             | 687  | chr5  | + |
| ENST00000558687 | RP11-752G15.6 | GENCODE             | 558  | chr15 | + |
| TCONS_00014700  | XLOC_006798   | LincRNAs identified | 248  | chr8  | + |
| TCONS_00013639  | XLOC_006301   | LincRNAs identified | 463  | chr7  | + |
| uc003yao.3      | BC062758      | UCSC_knowngene      | 1142 | chr8  | - |
| NR_073039       | MDK           | RefSeq              | 821  | chr11 | + |
| NR_073039       | MDK           | RefSeq              | 821  | chr11 | + |
| NR_073039       | MDK           | RefSeq              | 821  | chr11 | + |
| NR_073039       | MDK           | RefSeq              | 821  | chr11 | + |
| NR_073039       | MDK           | RefSeq              | 821  | chr11 | + |
| NR_073039       | MDK           | RefSeq              | 821  | chr11 | + |
| NR_027440       | LOC100272217  | RefSeq              | 2159 | chr9  | - |
| ENST00000415883 | RP11-346D19.1 | GENCODE             | 597  | chr6  | + |
| ENST00000533740 | RP11-939C17.4 | GENCODE             | 386  | chr11 | - |
| ENST00000445073 | RP11-399E6.1  | GENCODE             | 709  | chr1  | + |
| ENST00000445073 | RP11-399E6.1  | GENCODE             | 709  | chr1  | + |
| ENST00000445073 | RP11-399E6.1  | GENCODE             | 709  | chr1  | + |
| ENST00000445073 | RP11-399E6.1  | GENCODE             | 709  | chr1  | + |
| uc002tte.3      | BX648270      | UCSC_knowngene      | 4566 | chr2  | + |
| TCONS_00025358  | XLOC_012177   | LincRNAs identified | 1210 | chr17 | + |
| ENST00000526635 | CTD-2339L15.1 | GENCODE             | 419  | chr15 | - |
| ENST00000559518 | RP11-561C5.5  | GENCODE             | 553  | chr15 | - |
| ENST00000525656 | CTD-2313N18.4 | pseudogene          | 427  | chr11 | - |
| ENST00000571340 | RP11-44F14.8  | GENCODE             | 2142 | chr16 | + |
| ENST00000400768 | AC114730.8    | GENCODE             | 472  | chr2  | - |
| uc003yvm.3      | DQ574852      | UCSC_knowngene      | 4833 | chr8  | - |
| ENST00000432536 | GAS5          | GENCODE             | 841  | chr1  | - |
| ENST00000432536 | GAS5          | GENCODE             | 841  | chr1  | - |
| ENST00000532296 | RP5-901A4.1   | GENCODE             | 739  | chr11 | - |
| ENST00000532296 | RP5-901A4.1   | GENCODE             | 739  | chr11 | - |
| ENST00000532296 | RP5-901A4.1   | GENCODE             | 739  | chr11 | - |
| uc001pgr.3      | BC040646      | UCSC_knowngene      | 1952 | chr11 | + |
| TCONS_00020555  | XLOC_009868   | LincRNAs identified | 2469 | chr12 | + |
| TCONS_00018637  | XLOC_008986   | LincRNAs identified | 1817 | chr10 | - |
| ENST00000568106 | LA16c-358B7.3 | GENCODE             | 3107 | chr16 | - |
| ENST00000568106 | LA16c-358B7.3 | GENCODE             | 3107 | chr16 | - |
| ENST00000568106 | LA16c-358B7.3 | GENCODE             | 3107 | chr16 | - |

|           |           |                                  |                                        |                       |
|-----------|-----------|----------------------------------|----------------------------------------|-----------------------|
| 102389398 | 102449672 |                                  | GACACTGCAGGT 222234                    | exon sense-overlappi  |
| 102389398 | 102449672 |                                  | GACACTGCAGGT 222234                    | exon sense-overlappi  |
| 45430060  | 45434450  | NR_028412                        | GATTCAGGTTGT 1342                      | intergenic            |
| 102601068 | 102601512 |                                  | TGATACCATCTCCCAGACAGAAGCA              | intergenic            |
| 113963502 | 113966973 |                                  | CTAATTTATGGCATGCATATCATATC             | intergenic            |
| 225634944 | 225653045 |                                  | TCTGTAGCATTTTCTTTCTGGCAAC              | intergenic            |
| 15945758  | 15946461  | NR_015379                        | AATTTTCTTTAAGGTGTCCACGCAG              | intergenic            |
| 34606334  | 34797884  |                                  | GGCTTCTTTAAC 404744                    | intronic antisense    |
| 34606334  | 34797884  |                                  | GGCTTCTTTAAC 404744                    | intronic antisense    |
| 102142909 | 102154530 |                                  | CCTTATGCAAAGTGTGAACTTGGCC              | intergenic            |
| 155244287 | 155246502 | ENST00000329244                  | GGCAGTGTATTTGTAATGGTACATA              | intergenic            |
| 125485050 | 125486817 |                                  | GATCTTCAGAAATATAAATTAGCTA              | bidirectional         |
| 11338388  | 11344494  | TCONS_00007986                   | ACAAGGTGGACCTAAAACCTGGGTG              | intergenic            |
| 2144830   | 2147027   |                                  | TTTATCTTGGTCTCAGAGCAGTGAG              | intron sense-overlapp |
| 2144830   | 2147027   |                                  | TTTATCTTGGTCTCAGAGCAGTGAG              | intron sense-overlapp |
| 38666995  | 38668774  |                                  | AGAATATCACGTTTTTCTGAAGTTT              | intergenic            |
| 19650054  | 19662608  | ENST00000548107                  | GAACAGGTAGCTCTCAACATCTCTT              | intergenic            |
| 151673501 | 151680862 |                                  | ACACCCCAGTCCTCATGGTGTGCCT              | natural antisense     |
| 151673501 | 151680862 |                                  | ACACCCCAGTCCTCATGGTGTGCCT              | natural antisense     |
| 151673501 | 151680862 |                                  | ACACCCCAGTCCTCATGGTGTGCCT              | natural antisense     |
| 26908502  | 26910534  |                                  | TGATGAAAAGATTCAAGAGGCAATI              | bidirectional         |
| 26908502  | 26910534  |                                  | TGATGAAAAGATTCAAGAGGCAATI              | bidirectional         |
| 462929    | 463899    |                                  | GGCGCTTGGGGAGGCGAGGCTACAC              | intronic antisense    |
| 287991    | 288942    |                                  | GTGAGTTGCTGAGATTTCAATTTTA              | intergenic            |
| 30201815  | 30202254  |                                  | TTACTTTAAGAGACACTTACTGATG              | intergenic            |
| 180673524 | 180684245 | ENST00000505151                  | TCCATACAAGCTTGCAGAGTCAAGA              | natural antisense     |
| 83419317  | 83423789  |                                  | CTAGGACTCTGTGGCTGATTTATAA              | intergenic            |
| 55291717  | 55293397  |                                  | AATCTGGACTGCACTGAAACCTGGA              | intergenic            |
| 154795153 | 154806834 | NR_028090, TCONS_00000505151     | GGACCCGGCTATGCCGTGACGGAAT              | intergenic            |
| 76135660  | 76190696  |                                  | GACCTGTGGATGTTTTTTGAAAAGT              | intergenic            |
| 46403204  | 46405387  |                                  | CAGCGAGCGAAT 4192                      | exon sense-overlappi  |
| 46403204  | 46405387  |                                  | CAGCGAGCGAAT 4192                      | exon sense-overlappi  |
| 46403204  | 46405387  |                                  | CAGCGAGCGAAT 4192                      | exon sense-overlappi  |
| 46403204  | 46405387  |                                  | CAGCGAGCGAAT 4192                      | exon sense-overlappi  |
| 46403204  | 46405387  |                                  | CAGCGAGCGAAT 4192                      | exon sense-overlappi  |
| 46403204  | 46405387  |                                  | CAGCGAGCGAAT 4192                      | exon sense-overlappi  |
| 133452736 | 133454881 |                                  | CATGCAGTTATA 100272217                 | bidirectional         |
| 113852319 | 113864995 |                                  | CTCAGGCCTTCATATTCAGGACATG              | intergenic            |
| 75217981  | 75219436  |                                  | GCAGCTTAGACACGTTTTTGTACCT              | intron sense-overlapp |
| 41708246  | 41750533  |                                  | GAAGGATTAGGTGACAGCTAACACT              | bidirectional         |
| 41708246  | 41750533  |                                  | GAAGGATTAGGTGACAGCTAACACT              | bidirectional         |
| 41708246  | 41750533  |                                  | GAAGGATTAGGTGACAGCTAACACT              | bidirectional         |
| 41708246  | 41750533  |                                  | GAAGGATTAGGTGACAGCTAACACT              | bidirectional         |
| 132442469 | 132457442 |                                  | TAGAAGCAGACGTCTACTACTGTC               | intergenic            |
| 33640547  | 33652439  | TCONS_00025360, ENST00000533146, | CAAGAAGCTACCCTCTCCCCACCAG              | intergenic            |
| 40979920  | 40987296  |                                  | AGACGGGAGCTCGAGAGCTTGATCC              | natural antisense     |
| 85813534  | 85873459  |                                  | AGAGACCATGATCATAAATGTGGAA              | intergenic            |
| 71511708  | 71515691  |                                  | CCTGCGTGTGCTGTGAACTCTCTGCAGCTTACATGAGC |                       |
| 53420855  | 53422997  |                                  | TTCTTCTCAGGTAACCACAGAGTC               | intergenic            |
| 242674129 | 242674913 |                                  | CTCAGGGCCCGGAGGGGAAGGGCA               | natural antisense     |
| 141531042 | 141535875 | ENST00000560295                  | TTGGGGCAGGTGATTAATTTATAT               | intergenic            |
| 173834996 | 173836827 |                                  | CACTCTTTAAAA 60674                     | bidirectional         |
| 173834996 | 173836827 |                                  | CACTCTTTAAAA 60674                     | bidirectional         |
| 67792276  | 67797928  |                                  | CGACCTTGATTACAGCCCCTGGAG               | intronic antisense    |
| 67792276  | 67797928  |                                  | CGACCTTGATTACAGCCCCTGGAG               | intronic antisense    |
| 67792276  | 67797928  |                                  | CGACCTTGATTACAGCCCCTGGAG               | intronic antisense    |
| 101978616 | 101980568 |                                  | CGTTTACCCCTCTCAAGTGAGTTTTI             | intergenic            |
| 105789467 | 105806934 |                                  | TAAAAGATGCCATAAAAACACCAAGI             | exon sense-overlappi  |
| 128591476 | 128593410 |                                  | TCACTGAATGCATAAATAAGTGTAG              | intergenic            |
| 1369255   | 1372828   | ENST00000567829                  | CATTTAGAAGTTCCTGTATTCCTAA              | natural antisense     |
| 1369255   | 1372828   | ENST00000567829                  | CATTTAGAAGTTCCTGTATTCCTAA              | natural antisense     |
| 1369255   | 1372828   | ENST00000567829                  | CATTTAGAAGTTCCTGTATTCCTAA              | natural antisense     |

|                        |          |                               |           |           |
|------------------------|----------|-------------------------------|-----------|-----------|
| NM_001145268           | FAM185A  | protein FAM185A is +          | 102389398 | 102449672 |
| NM_001145269           | FAM185A  | protein FAM185A is +          | 102389398 | 102449672 |
| NM_207172              | NPSR1    | neuropeptide S recep +        | 34697896  | 34889590  |
| NM_207173              | NPSR1    | neuropeptide S recep +        | 34697896  | 34917944  |
| NM_007218              | RNF139   | E3 ubiquitin-protein +        | 125487007 | 125500859 |
| NM_000296              | PKD1     | polycystin-1 isoform -        | 2138710   | 2185899   |
| NM_001009944           | PKD1     | polycystin-1 isoform -        | 2138710   | 2185899   |
| NM_001172648           | CELF3    | CUGBP Elav-like far -         | 151672533 | 151688792 |
| NM_001172649           | CELF3    | CUGBP Elav-like far -         | 151672533 | 151688882 |
| NM_007185              | CELF3    | CUGBP Elav-like far -         | 151672533 | 151689290 |
| NM_001008697           | TFIP11   | tuftelin-interacting pr -     | 26887893  | 26908437  |
| NM_012143              | TFIP11   | tuftelin-interacting pr -     | 26887893  | 26908437  |
| NM_030783              | PTDSS2   | phosphatidylserine sy +       | 450279    | 491387    |
| NM_032765              | TRIM52   | tripartite motif-conta -      | 180683385 | 180688119 |
| NM_001012333           | MDK      | midkine isoform a pr +        | 46403260  | 46405387  |
| NM_001012334           | MDK      | midkine isoform a pr +        | 46402617  | 46405387  |
| NM_001270550           | MDK      | midkine isoform a pr +        | 46402333  | 46405387  |
| NM_001270551           | MDK      | midkine isoform a pr +        | 46403260  | 46405387  |
| NM_001270552           | MDK      | midkine isoform b pr +        | 46403204  | 46405387  |
| NM_002391              | MDK      | midkine isoform a pr +        | 46403204  | 46405387  |
| NM_003934              | FUBP3    | far upstream element +        | 133454959 | 133513739 |
| NM_030792              | GDPD5    | glycerophosphodiester -       | 75145684  | 75236599  |
| NM_001172218           | SCMH1    | polycomb protein SC -         | 41492870  | 41707815  |
| NM_001172219           | SCMH1    | polycomb protein SC -         | 41492870  | 41707815  |
| NM_001172220           | SCMH1    | polycomb protein SC -         | 41492870  | 41707815  |
| NM_012236              | SCMH1    | polycomb protein SC -         | 41492870  | 41707815  |
| ENST00000527860        | RAD51    | RAD51 homolog (S. +           | 40986971  | 41011084  |
| TGGTGAAACATGAAGAAAATGG |          |                               |           |           |
| NM_152783              | D2HGDH   | D-2-hydroxyglutarate +        | 242674029 | 242708231 |
| NM_001122770           | ZBTB37   | zinc finger and BTB +         | 173837492 | 173855774 |
| NM_032522              | ZBTB37   | zinc finger and BTB +         | 173837492 | 173842778 |
| NM_000694              | ALDH3B1  | aldehyde dehydroger +         | 67777789  | 67796743  |
| NM_001030010           | ALDH3B1  | aldehyde dehydroger +         | 67777789  | 67796743  |
| NM_001161473           | ALDH3B1  | aldehyde dehydroger +         | 67776047  | 67796743  |
| ENST00000549893        | C12orf75 | chromosome 12 oper +          | 105724487 | 105789875 |
| NM_003345              | UBE2I    | SUMO-conjugating $\epsilon$ + | 1359627   | 1377019   |
| NM_194259              | UBE2I    | SUMO-conjugating $\epsilon$ + | 1359627   | 1377019   |
| NM_194260              | UBE2I    | SUMO-conjugating $\epsilon$ + | 1359153   | 1377019   |



|             |             |           |           |            |           |
|-------------|-------------|-----------|-----------|------------|-----------|
| 346.266703  | 107.138255  | 8.035894  | 6.972193  | 353.86102  | 378.95926 |
| 346.266703  | 107.138255  | 8.035894  | 6.972193  | 353.86102  | 378.95926 |
| 343.710677  | 89.624598   | 8.026478  | 6.818752  | 272.44348  | 273.00272 |
| 124.647425  | 34.772559   | 6.553799  | 5.276755  | 200.4598   | 140.40388 |
| 6760.4677   | 845.605998  | 11.955957 | 9.771814  | 3535.7131  | 2990.9255 |
| 58.695334   | 11.738331   | 5.233151  | 3.796928  | 53.379612  | 13.520318 |
| 192.135802  | 43.318886   | 6.882382  | 5.722468  | 117.77188  | 58.20801  |
| 39.11296    | 8.517532    | 4.658474  | 2.904562  | 50.783867  | 21.73978  |
| 39.11296    | 8.517532    | 4.658474  | 2.904562  | 50.783867  | 21.73978  |
| 28.223901   | 10.746576   | 4.438757  | 3.40854   | 47.300552  | 27.053778 |
| 321.68663   | 67.67886    | 7.907279  | 6.185352  | 254.23315  | 192.3494  |
| 1419.131975 | 299.382986  | 9.885963  | 8.447628  | 888.9171   | 580.43445 |
| 48.088594   | 6.374432    | 4.652667  | 2.7737    | 64.30769   | 118.01172 |
| 18.615582   | 6.165261    | 3.828326  | 2.644731  | 22.141197  | 29.683802 |
| 18.615582   | 6.165261    | 3.828326  | 2.644731  | 22.141197  | 29.683802 |
| 46.731851   | 12.962867   | 4.994591  | 3.493068  | 74.18125   | 68.12562  |
| 346.843452  | 19.707601   | 7.080284  | 4.155871  | 554.6668   | 24.897516 |
| 230.33664   | 51.419437   | 7.26662   | 6.018507  | 276.34976  | 455.05133 |
| 230.33664   | 51.419437   | 7.26662   | 6.018507  | 276.34976  | 455.05133 |
| 230.33664   | 51.419437   | 7.26662   | 6.018507  | 276.34976  | 455.05133 |
| 51.794021   | 11.876868   | 5.097587  | 3.599104  | 32.775726  | 15.676092 |
| 51.794021   | 11.876868   | 5.097587  | 3.599104  | 32.775726  | 15.676092 |
| 15176.741   | 3812.989267 | 13.361293 | 12.279852 | 15972.216  | 6778.487  |
| 36.006793   | 10.429454   | 4.627346  | 3.568218  | 17.99864   | 15.949097 |
| 30.516561   | 7.656189    | 4.348697  | 3.091836  | 29.340395  | 59.275566 |
| 1666.102733 | 443.13812   | 10.157724 | 9.061478  | 1215.9543  | 1377.4307 |
| 100.231548  | 22.721382   | 6.206792  | 4.705983  | 110.627594 | 148.63329 |
| 34.87764    | 6.867285    | 4.791788  | 2.960567  | 40.59864   | 36.441055 |
| 28.29421    | 5.69285     | 4.398568  | 2.524112  | 25.424408  | 36.076214 |
| 3391.771823 | 650.158058  | 11.097978 | 8.660864  | 3356.8394  | 762.23944 |
| 154.003608  | 45.1063     | 6.49049   | 5.023989  | 221.89519  | 231.95541 |
| 154.003608  | 45.1063     | 6.49049   | 5.023989  | 221.89519  | 231.95541 |
| 154.003608  | 45.1063     | 6.49049   | 5.023989  | 221.89519  | 231.95541 |
| 154.003608  | 45.1063     | 6.49049   | 5.023989  | 221.89519  | 231.95541 |
| 154.003608  | 45.1063     | 6.49049   | 5.023989  | 221.89519  | 231.95541 |
| 154.003608  | 45.1063     | 6.49049   | 5.023989  | 221.89519  | 231.95541 |
| 154.003608  | 45.1063     | 6.49049   | 5.023989  | 221.89519  | 231.95541 |
| 1102.145905 | 191.87626   | 9.346265  | 7.804606  | 600.77716  | 424.59378 |
| 54.467108   | 5           | 5.389787  | 2.363479  | 56.711884  | 45.265575 |
| 86.611943   | 15.95745    | 6.022029  | 4.274763  | 73.9053    | 40.488808 |
| 186.309886  | 58.736099   | 5.454415  | 4.22056   | 15.978388  | 30.879232 |
| 186.309886  | 58.736099   | 5.454415  | 4.22056   | 15.978388  | 30.879232 |
| 186.309886  | 58.736099   | 5.454415  | 4.22056   | 15.978388  | 30.879232 |
| 186.309886  | 58.736099   | 5.454415  | 4.22056   | 15.978388  | 30.879232 |
| 118.704667  | 17.255534   | 5.985529  | 4.05422   | 182.45856  | 29.165442 |
| 3704.687667 | 1086.905003 | 11.337313 | 10.076455 | 4072.6567  | 5112.2383 |
| 1337.066262 | 306.362212  | 9.705023  | 8.414389  | 1703.1927  | 2662.9014 |
| 69.866203   | 14.573725   | 5.702136  | 4.106474  | 66.64668   | 96.73173  |
| 1405.994967 | 314.273338  | 9.986417  | 8.648924  | 1784.2507  | 1908.652  |
| 305.436261  | 31.938817   | 7.763768  | 5.198418  | 262.06418  | 417.0382  |
| 44.52916    | 13.090026   | 5.032959  | 3.976563  | 60.281357  | 46.448742 |
| 8033.8631   | 1988.525683 | 12.511582 | 11.367883 | 8203.098   | 5295.7764 |
| 186.205738  | 50.62065    | 7.130663  | 5.951172  | 220.29279  | 291.27023 |
| 186.205738  | 50.62065    | 7.130663  | 5.951172  | 220.29279  | 291.27023 |
| 183.807701  | 49.53617    | 7.007604  | 5.863116  | 147.701    | 178.84517 |
| 183.807701  | 49.53617    | 7.007604  | 5.863116  | 147.701    | 178.84517 |
| 183.807701  | 49.53617    | 7.007604  | 5.863116  | 147.701    | 178.84517 |
| 29.17438    | 10.577439   | 4.500821  | 3.390933  | 30.172066  | 40.24891  |
| 340.835782  | 103.868676  | 7.982102  | 6.747008  | 239.02365  | 217.84044 |
| 30.315091   | 6.427552    | 4.590171  | 2.888222  | 31.27622   | 34.514767 |
| 53.002679   | 14.808531   | 5.379473  | 4.180414  | 57.191807  | 56.350597 |
| 53.002679   | 14.808531   | 5.379473  | 4.180414  | 57.191807  | 56.350597 |
| 53.002679   | 14.808531   | 5.379473  | 4.180414  | 57.191807  | 56.350597 |

|            |           |            |           |           |           |
|------------|-----------|------------|-----------|-----------|-----------|
| 304.79907  | 462.5309  | 227.56334  | 349.88663 | 122.3487  | 66.4578   |
| 304.79907  | 462.5309  | 227.56334  | 349.88663 | 122.3487  | 66.4578   |
| 311.84042  | 462.99313 | 311.35226  | 430.63205 | 85.85692  | 74.23825  |
| 96.64033   | 90.52086  | 120.5216   | 99.33808  | 27.953266 | 16.52167  |
| 3851.9216  | 16633.463 | 3098.358   | 10452.425 | 1065.393  | 226.18578 |
| 103.488525 | 23.643805 | 87.3709    | 70.768845 | 7.839989  | 9.874224  |
| 130.59367  | 91.86561  | 419.0184   | 335.35724 | 32.64027  | 26.228584 |
| 72.75005   | 6.1959777 | 44.554344  | 38.653744 | 5.150827  | 4.9999995 |
| 72.75005   | 6.1959777 | 44.554344  | 38.653744 | 5.150827  | 4.9999995 |
| 32.214436  | 24.024157 | 18.883062  | 19.86742  | 10.788859 | 4.9999995 |
| 283.84024  | 403.61087 | 336.62967  | 459.45645 | 54.58209  | 17.095383 |
| 1082.345   | 2657.6572 | 1106.4357  | 2199.0024 | 271.7451  | 94.787735 |
| 12.702939  | 61.302433 | 5.5991173  | 26.607662 | 4.9999995 | 10.275211 |
| 15.059778  | 13.29531  | 18.60628   | 12.907128 | 4.9999995 | 4.9999995 |
| 15.059778  | 13.29531  | 18.60628   | 12.907128 | 4.9999995 | 4.9999995 |
| 37.322998  | 14.00723  | 53.73545   | 33.018555 | 7.7956247 | 5.8980513 |
| 1033.1859  | 279.44748 | 38.107327  | 150.75569 | 29.271082 | 16.05737  |
| 101.92033  | 274.99924 | 89.79452   | 183.90466 | 51.87742  | 45.147312 |
| 101.92033  | 274.99924 | 89.79452   | 183.90466 | 51.87742  | 45.147312 |
| 101.92033  | 274.99924 | 89.79452   | 183.90466 | 51.87742  | 45.147312 |
| 56.267315  | 110.67873 | 22.828913  | 72.53735  | 11.736539 | 4.9999995 |
| 56.267315  | 110.67873 | 22.828913  | 72.53735  | 11.736539 | 4.9999995 |
| 19791.803  | 9326.016  | 20274.287  | 18917.637 | 4427.127  | 3360.738  |
| 23.018381  | 32.658855 | 69.36989   | 57.045895 | 5.9888844 | 7.390107  |
| 9.555431   | 45.595646 | 12.8335085 | 26.49882  | 6.6870766 | 9.859689  |
| 860.0778   | 3095.4407 | 1108.0386  | 2339.6743 | 437.05942 | 216.31766 |
| 43.562286  | 94.970146 | 85.286194  | 118.30978 | 23.897524 | 14.772349 |
| 38.41688   | 39.34754  | 23.878378  | 30.583344 | 4.9999995 | 7.6180043 |
| 20.294289  | 46.93649  | 11.829129  | 29.204731 | 4.9999995 | 4.9999995 |
| 6131.2173  | 3144.7168 | 3059.594   | 3896.024  | 974.16504 | 45.89544  |
| 178.14412  | 15.372448 | 148.71048  | 127.944   | 69.15253  | 9.391938  |
| 178.14412  | 15.372448 | 148.71048  | 127.944   | 69.15253  | 9.391938  |
| 178.14412  | 15.372448 | 148.71048  | 127.944   | 69.15253  | 9.391938  |
| 178.14412  | 15.372448 | 148.71048  | 127.944   | 69.15253  | 9.391938  |
| 178.14412  | 15.372448 | 148.71048  | 127.944   | 69.15253  | 9.391938  |
| 178.14412  | 15.372448 | 148.71048  | 127.944   | 69.15253  | 9.391938  |
| 178.14412  | 15.372448 | 148.71048  | 127.944   | 69.15253  | 9.391938  |
| 697.89954  | 2795.21   | 470.14835  | 1624.2466 | 231.95319 | 88.91058  |
| 46.2219    | 39.5209   | 59.183147  | 79.89924  | 4.9999995 | 4.9999995 |
| 89.97916   | 134.26768 | 75.73731   | 105.2934  | 15.499039 | 20.588722 |
| 10.187419  | 24.658937 | 617.5644   | 418.59094 | 6.0977483 | 4.9999995 |
| 10.187419  | 24.658937 | 617.5644   | 418.59094 | 6.0977483 | 4.9999995 |
| 10.187419  | 24.658937 | 617.5644   | 418.59094 | 6.0977483 | 4.9999995 |
| 10.187419  | 24.658937 | 617.5644   | 418.59094 | 6.0977483 | 4.9999995 |
| 323.67365  | 98.83592  | 25.169573  | 52.924854 | 26.323046 | 16.344238 |
| 2466.5962  | 1729.4514 | 4913.275   | 3933.9084 | 970.54755 | 271.38785 |
| 607.151    | 380.29227 | 1492.8265  | 1176.0337 | 383.4048  | 171.7509  |
| 32.35147   | 77.26741  | 58.97022   | 87.22971  | 13.18324  | 10.208008 |
| 1359.038   | 705.9148  | 1326.3328  | 1351.7815 | 284.89874 | 213.09543 |
| 106.922935 | 395.41687 | 294.86383  | 356.31155 | 40.476555 | 21.379118 |
| 33.46286   | 24.608637 | 71.91247   | 30.460896 | 16.532475 | 10.210861 |
| 11036.168  | 7283.3726 | 7372.5796  | 9012.184  | 1872.076  | 1816.7577 |
| 144.84769  | 142.94762 | 136.67838  | 181.19772 | 45.16879  | 45.73275  |
| 144.84769  | 142.94762 | 136.67838  | 181.19772 | 45.16879  | 45.73275  |
| 88.852066  | 101.23329 | 312.8788   | 273.33588 | 33.849525 | 34.17237  |
| 88.852066  | 101.23329 | 312.8788   | 273.33588 | 33.849525 | 34.17237  |
| 88.852066  | 101.23329 | 312.8788   | 273.33588 | 33.849525 | 34.17237  |
| 22.923773  | 38.843315 | 17.761559  | 25.096655 | 7.517471  | 4.9999995 |
| 282.16162  | 400.34915 | 415.29736  | 490.34247 | 100.51733 | 24.975584 |
| 21.969374  | 38.46149  | 25.79797   | 29.870728 | 4.9999995 | 5.5741963 |
| 42.607723  | 47.43941  | 52.499905  | 61.92663  | 15.479751 | 15.680587 |
| 42.607723  | 47.43941  | 52.499905  | 61.92663  | 15.479751 | 15.680587 |
| 42.607723  | 47.43941  | 52.499905  | 61.92663  | 15.479751 | 15.680587 |

|           |            |           |            |           |            |
|-----------|------------|-----------|------------|-----------|------------|
| 192.42099 | 69.36629   | 118.42542 | 73.81033   | 8.011523  | 8.273411   |
| 192.42099 | 69.36629   | 118.42542 | 73.81033   | 8.011523  | 8.273411   |
| 88.49907  | 123.73177  | 80.65391  | 84.76767   | 7.6315513 | 7.8267465  |
| 73.976654 | 30.62848   | 25.131899 | 34.423386  | 7.195143  | 6.9045844  |
| 2081.254  | 499.4565   | 699.14166 | 502.20505  | 11.310052 | 11.124279  |
| 11.671291 | 13.59491   | 17.501278 | 9.948296   | 5.2715163 | 3.7964973  |
| 44.89012  | 61.786823  | 51.86175  | 42.50577   | 6.428829  | 5.7064657  |
| 22.42696  | 8.527407   | 4.9999995 | 4.9999995  | 5.199905  | 4.40574    |
| 22.42696  | 8.527407   | 4.9999995 | 4.9999995  | 5.199905  | 4.40574    |
| 23.012903 | 5.8083587  | 11.02706  | 8.842278   | 5.1058517 | 4.7052555  |
| 98.04707  | 120.191505 | 44.001587 | 72.155525  | 7.533695  | 7.34399    |
| 485.9145  | 281.6888   | 402.3711  | 259.79068  | 9.327154  | 8.871387   |
| 4.9999995 | 7.9713836  | 4.9999995 | 4.9999995  | 5.548351  | 6.659801   |
| 6.5003886 | 10.491181  | 4.9999995 | 4.9999995  | 4.0054483 | 4.827268   |
| 6.5003886 | 10.491181  | 4.9999995 | 4.9999995  | 4.0054483 | 4.827268   |
| 24.129383 | 4.9999995  | 29.954142 | 4.9999995  | 5.7578397 | 5.9179115  |
| 47.460957 | 11.3426285 | 4.9999995 | 9.113569   | 8.633799  | 4.593457   |
| 58.45848  | 56.75231   | 50.579704 | 45.701397  | 7.6581407 | 8.522633   |
| 58.45848  | 56.75231   | 50.579704 | 45.701397  | 7.6581407 | 8.522633   |
| 58.45848  | 56.75231   | 50.579704 | 45.701397  | 7.6581407 | 8.522633   |
| 19.200012 | 6.6084275  | 15.845809 | 12.87042   | 4.5737348 | 3.9892693  |
| 19.200012 | 6.6084275  | 15.845809 | 12.87042   | 4.5737348 | 3.9892693  |
| 5499.8867 | 3998.6775  | 2689.835  | 2901.6714  | 13.498958 | 12.26291   |
| 9.099886  | 17.311638  | 14.923919 | 7.862289   | 3.7005663 | 4.014574   |
| 4.9999995 | 12.37547   | 4.9999995 | 7.0149016  | 4.41924   | 5.727525   |
| 643.4007  | 295.65274  | 665.7997  | 400.5985   | 9.775087  | 10.059771  |
| 38.467606 | 16.49959   | 28.201694 | 14.4895315 | 6.34217   | 6.9815273  |
| 9.326692  | 8.548959   | 5.710058  | 4.9999995  | 4.8798804 | 5.0948715  |
| 9.157105  | 4.9999995  | 4.9999995 | 4.9999995  | 4.210272  | 5.082851   |
| 2141.655  | 109.27738  | 415.42917 | 214.52632  | 11.228771 | 9.241855   |
| 135.67657 | 9.458891   | 33.30753  | 13.650342  | 7.344956  | 7.599537   |
| 135.67657 | 9.458891   | 33.30753  | 13.650342  | 7.344956  | 7.599537   |
| 135.67657 | 9.458891   | 33.30753  | 13.650342  | 7.344956  | 7.599537   |
| 135.67657 | 9.458891   | 33.30753  | 13.650342  | 7.344956  | 7.599537   |
| 135.67657 | 9.458891   | 33.30753  | 13.650342  | 7.344956  | 7.599537   |
| 135.67657 | 9.458891   | 33.30753  | 13.650342  | 7.344956  | 7.599537   |
| 135.67657 | 9.458891   | 33.30753  | 13.650342  | 7.344956  | 7.599537   |
| 360.19867 | 144.79207  | 185.2152  | 140.18785  | 8.755931  | 8.422825   |
| 4.9999995 | 4.9999995  | 4.9999995 | 4.9999995  | 5.364252  | 5.378251   |
| 17.103006 | 18.176012  | 10.63842  | 13.739499  | 5.7517214 | 5.2322044  |
| 4.9999995 | 5.0066395  | 230.72392 | 100.58829  | 3.524983  | 4.8820934  |
| 4.9999995 | 5.0066395  | 230.72392 | 100.58829  | 3.524983  | 4.8820934  |
| 4.9999995 | 5.0066395  | 230.72392 | 100.58829  | 3.524983  | 4.8820934  |
| 4.9999995 | 5.0066395  | 230.72392 | 100.58829  | 3.524983  | 4.8820934  |
| 37.528175 | 12.111379  | 5.597945  | 5.628423   | 7.0534673 | 4.803363   |
| 3063.0037 | 583.32117  | 1018.3271 | 614.84265  | 11.501801 | 11.8569565 |
| 674.3337  | 169.65721  | 264.2941  | 174.73256  | 10.264538 | 10.955659  |
| 23.310534 | 15.80126   | 11.871569 | 13.0677395 | 5.599554  | 6.3789563  |
| 391.62833 | 312.07056  | 391.99377 | 291.9532   | 10.317698 | 10.484809  |
| 56.202408 | 30.868906  | 23.92097  | 18.784945  | 7.57663   | 8.397927   |
| 13.026451 | 13.14024   | 15.997768 | 9.632362   | 5.4540415 | 5.412939   |
| 1979.2458 | 2045.4551  | 2384.0444 | 1833.5751  | 12.5049   | 11.911033  |
| 32.82399  | 49.166138  | 79.791725 | 51.040504  | 7.334412  | 7.9157505  |
| 32.82399  | 49.166138  | 79.791725 | 51.040504  | 7.334412  | 7.9157505  |
| 50.66184  | 37.808826  | 92.42743  | 48.297028  | 6.7508183 | 7.2410746  |
| 50.66184  | 37.808826  | 92.42743  | 48.297028  | 6.7508183 | 7.2410746  |
| 50.66184  | 37.808826  | 92.42743  | 48.297028  | 6.7508183 | 7.2410746  |
| 14.282123 | 20.830042  | 10.459549 | 5.3754506  | 4.4596076 | 5.223886   |
| 152.93567 | 50.944874  | 191.2597  | 102.578896 | 7.4483156 | 7.5088086  |
| 4.9999995 | 5.7033973  | 8.12804   | 9.15968    | 4.5105553 | 5.02689    |
| 17.336758 | 15.493008  | 12.868431 | 11.99265   | 5.376331  | 5.6640077  |
| 17.336758 | 15.493008  | 12.868431 | 11.99265   | 5.376331  | 5.6640077  |
| 17.336758 | 15.493008  | 12.868431 | 11.99265   | 5.376331  | 5.6640077  |

|           |            |           |           |           |           |
|-----------|------------|-----------|-----------|-----------|-----------|
| 7.916737  | 8.538454   | 7.5851855 | 7.890055  | 7.1670766 | 6.909728  |
| 7.916737  | 8.538454   | 7.5851855 | 7.890055  | 7.1670766 | 6.909728  |
| 7.948268  | 8.539523   | 8.03266   | 8.1801195 | 6.652263  | 7.05838   |
| 6.270905  | 6.147895   | 6.6913843 | 6.1128807 | 5.041163  | 4.8613305 |
| 11.548703 | 13.700135  | 11.304102 | 12.748472 | 10.359538 | 8.676701  |
| 6.37757   | 4.074767   | 6.2432046 | 5.6353493 | 3.1669352 | 4.0853806 |
| 6.7071934 | 6.167836   | 8.449653  | 7.8343163 | 5.259838  | 5.5485444 |
| 5.8713107 | 2.3547673  | 5.317281  | 4.8018427 | 2.5790408 | 2.4279919 |
| 5.8713107 | 2.3547673  | 5.317281  | 4.8018427 | 2.5790408 | 2.4279919 |
| 4.696985  | 4.1003222  | 4.1440926 | 3.8800344 | 3.65762   | 2.4279919 |
| 7.8128533 | 8.342337   | 8.141571  | 8.26923   | 6.0056114 | 4.9143815 |
| 9.708847  | 11.04531   | 9.855436  | 10.507644 | 8.348115  | 7.422022  |
| 3.3363662 | 5.5612903  | 2.5341594 | 4.2760344 | 2.3467326 | 4.1450634 |
| 3.5868278 | 3.1390417  | 4.1257625 | 3.2856052 | 2.3467326 | 2.4279919 |
| 3.5868278 | 3.1390417  | 4.1257625 | 3.2856052 | 2.3467326 | 2.4279919 |
| 4.907662  | 3.2298486  | 5.563854  | 4.5904274 | 3.1604223 | 3.3055475 |
| 9.637011  | 7.8088465  | 5.0987654 | 6.7098274 | 5.101483  | 4.823029  |
| 6.3549604 | 7.7867117  | 6.280999  | 6.996277  | 5.931111  | 6.3430276 |
| 6.3549604 | 7.7867117  | 6.280999  | 6.996277  | 5.931111  | 6.3430276 |
| 6.3549604 | 7.7867117  | 6.280999  | 6.996277  | 5.931111  | 6.3430276 |
| 5.4985404 | 6.447755   | 4.403946  | 5.6722775 | 3.7833061 | 2.4279919 |
| 5.4985404 | 6.447755   | 4.403946  | 5.6722775 | 3.7833061 | 2.4279919 |
| 14.025061 | 12.826483  | 13.979705 | 13.574642 | 12.427867 | 12.627403 |
| 4.2135506 | 4.586977   | 5.9131503 | 5.335258  | 2.7844732 | 3.6458886 |
| 2.9478207 | 5.105668   | 3.6215298 | 4.270399  | 2.9366338 | 4.0831256 |
| 9.394972  | 11.263188  | 9.856511  | 10.596813 | 9.037142  | 8.615323  |
| 5.1215997 | 6.218216   | 6.2097416 | 6.367498  | 4.8217707 | 4.6949077 |
| 4.9492784 | 4.87635    | 4.467674  | 4.482672  | 2.3467326 | 3.6890357 |
| 4.0234346 | 5.151302   | 3.5095649 | 4.413984  | 2.3467326 | 2.4279919 |
| 12.22285  | 11.2831745 | 11.286409 | 11.324808 | 10.244089 | 6.36659   |
| 7.149307  | 3.3805084  | 6.995343  | 6.4732866 | 6.3448944 | 4.007168  |
| 7.149307  | 3.3805084  | 6.995343  | 6.4732866 | 6.3448944 | 4.007168  |
| 7.149307  | 3.3805084  | 6.995343  | 6.4732866 | 6.3448944 | 4.007168  |
| 7.149307  | 3.3805084  | 6.995343  | 6.4732866 | 6.3448944 | 4.007168  |
| 7.149307  | 3.3805084  | 6.995343  | 6.4732866 | 6.3448944 | 4.007168  |
| 7.149307  | 3.3805084  | 6.995343  | 6.4732866 | 6.3448944 | 4.007168  |
| 9.087545  | 11.116988  | 8.618181  | 10.076117 | 8.110966  | 7.322574  |
| 5.2087345 | 4.882836   | 5.6976986 | 5.806952  | 2.3467326 | 2.4279919 |
| 6.172302  | 6.739757   | 6.038169  | 6.198021  | 4.1863685 | 5.1956816 |
| 3.033061  | 4.1422615  | 9.004969  | 8.139122  | 2.8110275 | 2.4279919 |
| 3.033061  | 4.1422615  | 9.004969  | 8.139122  | 2.8110275 | 2.4279919 |
| 3.033061  | 4.1422615  | 9.004969  | 8.139122  | 2.8110275 | 2.4279919 |
| 3.033061  | 4.1422615  | 9.004969  | 8.139122  | 2.8110275 | 2.4279919 |
| 8.002997  | 6.2765837  | 4.539805  | 5.2369585 | 4.9601407 | 4.846613  |
| 10.923324 | 10.442846  | 11.959332 | 11.339621 | 10.239256 | 8.951307  |
| 8.87462   | 8.2481365  | 10.27154  | 9.615644  | 8.843277  | 8.268785  |
| 4.704607  | 5.909313   | 5.6930423 | 5.9273405 | 3.947702  | 4.134368  |
| 10.047306 | 9.155938   | 10.09799  | 9.814762  | 8.4162855 | 8.59319   |
| 6.42191   | 8.309002   | 7.9627295 | 7.914412  | 5.574485  | 5.249404  |
| 4.7517548 | 4.138937   | 5.964012  | 4.4760723 | 4.2790318 | 4.1348953 |
| 13.104774 | 12.481129  | 12.532224 | 12.535432 | 11.182822 | 11.71647  |
| 6.8536906 | 6.835222   | 6.8698378 | 6.9750648 | 5.727311  | 6.3622093 |
| 6.8536906 | 6.835222   | 6.8698378 | 6.9750648 | 5.727311  | 6.3622093 |
| 6.155646  | 6.3121314  | 8.039865  | 7.5460916 | 5.311153  | 5.9355555 |
| 6.155646  | 6.3121314  | 8.039865  | 7.5460916 | 5.311153  | 5.9355555 |
| 6.155646  | 6.3121314  | 8.039865  | 7.5460916 | 5.311153  | 5.9355555 |
| 4.207841  | 4.855729   | 4.062228  | 4.1956325 | 3.1045434 | 2.4279919 |
| 7.8034234 | 8.330698   | 8.438243  | 8.363123  | 6.8869505 | 5.472029  |
| 4.1435394 | 4.8383203  | 4.5726643 | 4.4490542 | 2.3467326 | 3.215198  |
| 5.090735  | 5.167788   | 5.5333614 | 5.444613  | 4.1845884 | 4.788298  |
| 5.090735  | 5.167788   | 5.5333614 | 5.444613  | 4.1845884 | 4.788298  |
| 5.090735  | 5.167788   | 5.5333614 | 5.444613  | 4.1845884 | 4.788298  |

|           |           |           |           |
|-----------|-----------|-----------|-----------|
| 7.5374146 | 6.4260893 | 7.1370745 | 6.6557727 |
| 7.5374146 | 6.4260893 | 7.1370745 | 6.6557727 |
| 6.43744   | 7.316149  | 6.591478  | 6.856805  |
| 6.1821127 | 5.147186  | 4.922719  | 5.5060205 |
| 10.972676 | 9.414182  | 9.680368  | 9.52742   |
| 3.6388113 | 3.8882163 | 4.4018717 | 3.6003551 |
| 5.4862375 | 6.2474074 | 5.9668646 | 5.825919  |
| 4.519209  | 3.186564  | 2.3618152 | 2.352752  |
| 4.519209  | 3.186564  | 2.3618152 | 2.352752  |
| 4.5556087 | 2.6497142 | 3.7381823 | 3.422123  |
| 6.5748835 | 7.264973  | 5.728891  | 6.6233706 |
| 8.880659  | 8.577859  | 8.896685  | 8.560425  |
| 2.350709  | 3.085128  | 2.3618152 | 2.352752  |
| 2.8833127 | 3.4957795 | 2.3618152 | 2.352752  |
| 2.8833127 | 3.4957795 | 2.3618152 | 2.352752  |
| 4.617343  | 2.3408759 | 5.1814675 | 2.352752  |
| 5.5663614 | 3.6138785 | 2.3618152 | 3.4686584 |
| 5.856167  | 6.113735  | 5.9314475 | 5.9355555 |
| 5.856167  | 6.113735  | 5.9314475 | 5.9355555 |
| 5.856167  | 6.113735  | 5.9314475 | 5.9355555 |
| 4.31089   | 2.823288  | 4.2569375 | 3.9922087 |
| 4.31089   | 2.823288  | 4.2569375 | 3.9922087 |
| 12.391281 | 12.491043 | 11.642957 | 12.098563 |
| 3.3045406 | 4.256682  | 4.1721888 | 3.2455347 |
| 2.350709  | 3.7457561 | 2.3618152 | 3.0729787 |
| 9.272681  | 8.654312  | 9.606584  | 9.182827  |
| 5.268574  | 4.1867805 | 5.092321  | 4.1715426 |
| 3.3397624 | 3.1904263 | 2.844695  | 2.352752  |
| 3.3145049 | 2.3408759 | 2.3618152 | 2.352752  |
| 11.023864 | 7.1154013 | 8.941606  | 8.273631  |
| 7.0405917 | 3.3380566 | 5.33018   | 4.083042  |
| 7.0405917 | 3.3380566 | 5.33018   | 4.083042  |
| 7.0405917 | 3.3380566 | 5.33018   | 4.083042  |
| 7.0405917 | 3.3380566 | 5.33018   | 4.083042  |
| 7.0405917 | 3.3380566 | 5.33018   | 4.083042  |
| 7.0405917 | 3.3380566 | 5.33018   | 4.083042  |
| 7.0405917 | 3.3380566 | 5.33018   | 4.083042  |
| 8.437454  | 7.5509963 | 7.78195   | 7.623695  |
| 2.350709  | 2.3408759 | 2.3618152 | 2.352752  |
| 4.1503015 | 4.328668  | 3.6924956 | 4.09506   |
| 2.350709  | 2.5112703 | 8.106773  | 7.1155906 |
| 2.350709  | 2.5112703 | 8.106773  | 7.1155906 |
| 2.350709  | 2.5112703 | 8.106773  | 7.1155906 |
| 2.350709  | 2.5112703 | 8.106773  | 7.1155906 |
| 5.232718  | 3.713131  | 2.8187363 | 2.7539785 |
| 11.543254 | 9.653299  | 10.251916 | 9.819699  |
| 9.342271  | 7.7793503 | 8.299912  | 7.9527364 |
| 4.57357   | 4.122824  | 3.8444438 | 4.015938  |
| 8.565757  | 8.738177  | 8.854871  | 8.725263  |
| 5.8019886 | 5.1575456 | 4.8491797 | 4.5579066 |
| 3.7814782 | 3.836934  | 4.2733855 | 3.5536509 |
| 10.890528 | 11.498745 | 11.473399 | 11.445333 |
| 5.049529  | 5.8878803 | 6.577146  | 6.1029553 |
| 5.049529  | 5.8878803 | 6.577146  | 6.1029553 |
| 5.657776  | 5.473324  | 6.7811813 | 6.0197062 |
| 5.657776  | 5.473324  | 6.7811813 | 6.0197062 |
| 5.657776  | 5.473324  | 6.7811813 | 6.0197062 |
| 3.9051957 | 4.545908  | 3.668214  | 2.6937456 |
| 7.2052975 | 5.9441776 | 7.8291187 | 7.1444726 |
| 2.350709  | 2.6249855 | 3.3150547 | 3.476653  |
| 4.1675897 | 4.0945215 | 3.9621627 | 3.8853211 |
| 4.1675897 | 4.0945215 | 3.9621627 | 3.8853211 |
| 4.1675897 | 4.0945215 | 3.9621627 | 3.8853211 |

|               |             |             |            |    |           |
|---------------|-------------|-------------|------------|----|-----------|
| ASHGA5P048981 | 0.000204465 | 0.01146874  | 2.2958989  | up | noncoding |
| ASHGA5P021093 | 0.005574791 | 0.047417224 | 2.8424497  | up | noncoding |
| ASHGA5P033391 | 0.048676541 | 0.143360998 | 6.1281088  | up | noncoding |
| ASHGA5P047633 | 0.030285573 | 0.109120103 | 2.6965832  | up | noncoding |
| ASHGA5P045741 | 0.027033501 | 0.102614663 | 3.2588764  | up | noncoding |
| ASHGA5P042632 | 3.82242E-05 | 0.006301164 | 3.3345175  | up | noncoding |
| ASHGA5P027317 | 0.026203038 | 0.100833346 | 8.571684   | up | noncoding |
| ASHGA5P041578 | 0.00140473  | 0.025092339 | 2.1698533  | up | noncoding |
| ASHGA5P056051 | 0.009997501 | 0.06206579  | 2.0646679  | up | noncoding |
| ASHGA5P056051 | 0.009997501 | 0.06206579  | 2.0646679  | up | noncoding |
| ASHGA5P056051 | 0.009997501 | 0.06206579  | 2.0646679  | up | noncoding |
| ASHGA5P056051 | 0.009997501 | 0.06206579  | 2.0646679  | up | noncoding |
| ASHGA5P056051 | 0.009997501 | 0.06206579  | 2.0646679  | up | noncoding |
| ASHGA5P056051 | 0.009997501 | 0.06206579  | 2.0646679  | up | noncoding |
| ASHGA5P056051 | 0.009997501 | 0.06206579  | 2.0646679  | up | noncoding |
| ASHGA5P056051 | 0.009997501 | 0.06206579  | 2.0646679  | up | noncoding |
| ASHGA5P056051 | 0.009997501 | 0.06206579  | 2.0646679  | up | noncoding |
| ASHGA5P056051 | 0.009997501 | 0.06206579  | 2.0646679  | up | noncoding |
| ASHGA5P056051 | 0.009997501 | 0.06206579  | 2.0646679  | up | noncoding |
| ASHGA5P056051 | 0.009997501 | 0.06206579  | 2.0646679  | up | noncoding |
| ASHGA5P057819 | 0.042794127 | 0.132584608 | 2.5138637  | up | noncoding |
| ASHGA5P020318 | 0.003953378 | 0.040405952 | 2.1904876  | up | noncoding |
| ASHGA5P041951 | 0.001898031 | 0.029176753 | 3.3717891  | up | noncoding |
| ASHGA5P051875 | 0.035108278 | 0.118596641 | 2.0809214  | up | noncoding |
| ASHGA5P014885 | 0.000194962 | 0.01146874  | 2.4539935  | up | noncoding |
| ASHGA5P014885 | 0.000194962 | 0.01146874  | 2.4539935  | up | noncoding |
| ASHGA5P014885 | 0.000194962 | 0.01146874  | 2.4539935  | up | noncoding |
| ASHGA5P020158 | 0.040841188 | 0.129117831 | 2.3478234  | up | noncoding |
| ASHGA5P020158 | 0.040841188 | 0.129117831 | 2.3478234  | up | noncoding |
| ASHGA5P017564 | 0.003800588 | 0.039493479 | 2.3001728  | up | noncoding |
| ASHGA5P017564 | 0.003800588 | 0.039493479 | 2.3001728  | up | noncoding |
| ASHGA5P017564 | 0.003800588 | 0.039493479 | 2.3001728  | up | noncoding |
| ASHGA5P017564 | 0.003800588 | 0.039493479 | 2.3001728  | up | noncoding |
| ASHGA5P017564 | 0.003800588 | 0.039493479 | 2.3001728  | up | noncoding |
| ASHGA5P017564 | 0.003800588 | 0.039493479 | 2.3001728  | up | noncoding |
| ASHGA5P020443 | 0.003054512 | 0.035781836 | 3.3201845  | up | noncoding |
| ASHGA5P029901 | 0.000141747 | 0.01066938  | 22.3343717 | up | noncoding |
| ASHGA5P042342 | 0.002459793 | 0.032230552 | 2.3726938  | up | noncoding |
| ASHGA5P032716 | 5.16342E-05 | 0.007392592 | 2.5753693  | up | noncoding |
| ASHGA5P032732 | 0.000162001 | 0.011182026 | 3.6858791  | up | noncoding |
| ASHGA5P017959 | 0.003596311 | 0.038615726 | 2.0361312  | up | noncoding |
| ASHGA5P017959 | 0.003596311 | 0.038615726 | 2.0361312  | up | noncoding |
| ASHGA5P017959 | 0.003596311 | 0.038615726 | 2.0361312  | up | noncoding |
| ASHGA5P038130 | 0.032935545 | 0.114267657 | 4.0639157  | up | noncoding |
| ASHGA5P038130 | 0.032935545 | 0.114267657 | 4.0639157  | up | noncoding |
| ASHGA5P045175 | 0.046038937 | 0.138218388 | 2.4021598  | up | noncoding |
| ASHGA5P053393 | 0.000537448 | 0.015963419 | 2.897849   | up | noncoding |
| ASHGA5P038627 | 0.016373796 | 0.078125296 | 3.2426947  | up | noncoding |
| ASHGA5P038411 | 0.010899394 | 0.064586652 | 2.8580065  | up | noncoding |
| ASHGA5P021484 | 0.000881467 | 0.02004903  | 3.0887676  | up | noncoding |
| ASHGA5P021484 | 0.000881467 | 0.02004903  | 3.0887676  | up | noncoding |
| ASHGA5P021484 | 0.000881467 | 0.02004903  | 3.0887676  | up | noncoding |
| ASHGA5P032711 | 0.027260811 | 0.103003137 | 9.0804344  | up | noncoding |
| ASHGA5P043447 | 0.005807882 | 0.048450721 | 2.0771654  | up | noncoding |
| ASHGA5P043447 | 0.005807882 | 0.048450721 | 2.0771654  | up | noncoding |
| ASHGA5P043447 | 0.005807882 | 0.048450721 | 2.0771654  | up | noncoding |
| ASHGA5P027219 | 0.041482069 | 0.130029045 | 2.3979538  | up | noncoding |
| ASHGA5P036948 | 0.003065967 | 0.035804635 | 2.7464213  | up | noncoding |
| ASHGA5P036948 | 0.003065967 | 0.035804635 | 2.7464213  | up | noncoding |
| ASHGA5P025986 | 0.00043508  | 0.014669266 | 3.2007553  | up | noncoding |
| ASHGA5P025986 | 0.00043508  | 0.014669266 | 3.2007553  | up | noncoding |
| ASHGA5P025986 | 0.00043508  | 0.014669266 | 3.2007553  | up | noncoding |
| ASHGA5P025986 | 0.00043508  | 0.014669266 | 3.2007553  | up | noncoding |
| ASHGA5P040852 | 0.000437307 | 0.014669266 | 3.3576113  | up | noncoding |
| ASHGA5P040852 | 0.000437307 | 0.014669266 | 3.3576113  | up | noncoding |

|                 |               |                     |      |       |   |
|-----------------|---------------|---------------------|------|-------|---|
| ENST00000568106 | LA16c-358B7.3 | GENCODE             | 3107 | chr16 | - |
| ENST00000524962 | RP11-680F20.6 | GENCODE             | 507  | chr11 | + |
| NR_040050       | LOC100507351  | RefSeq              | 4232 | chr17 | + |
| ENST00000443919 | RP11-316M21.7 | GENCODE             | 578  | chr10 | + |
| ENST00000439342 | RP11-318K12.2 | GENCODE             | 305  | chr9  | + |
| uc003qdy.1      | SNORA33       | UCSC_knowngene      | 2045 | chr6  | + |
| ENST00000512916 | HOXC-AS5      | GENCODE             | 1408 | chr12 | - |
| ENST00000358442 | RP11-423H2.1  | GENCODE             | 515  | chr5  | + |
| ENST00000445805 | RP4-594I10.2  | GENCODE             | 420  | chr1  | - |
| ENST00000445805 | RP4-594I10.2  | GENCODE             | 420  | chr1  | - |
| ENST00000445805 | RP4-594I10.2  | GENCODE             | 420  | chr1  | - |
| ENST00000445805 | RP4-594I10.2  | GENCODE             | 420  | chr1  | - |
| ENST00000445805 | RP4-594I10.2  | GENCODE             | 420  | chr1  | - |
| ENST00000445805 | RP4-594I10.2  | GENCODE             | 420  | chr1  | - |
| ENST00000445805 | RP4-594I10.2  | GENCODE             | 420  | chr1  | - |
| ENST00000445805 | RP4-594I10.2  | GENCODE             | 420  | chr1  | - |
| ENST00000445805 | RP4-594I10.2  | GENCODE             | 420  | chr1  | - |
| ENST00000445805 | RP4-594I10.2  | GENCODE             | 420  | chr1  | - |
| ENST00000445805 | RP4-594I10.2  | GENCODE             | 420  | chr1  | - |
| ENST00000445805 | RP4-594I10.2  | GENCODE             | 420  | chr1  | - |
| ENST00000445805 | RP4-594I10.2  | GENCODE             | 420  | chr1  | - |
| TCONS_00022189  | XLOC_010411   | LincRNAs identified | 259  | chr13 | + |
| ENST00000511488 | FAM86EP       | GENCODE             | 1209 | chr4  | - |
| ENST00000564541 | RP13-44L19.2  | GENCODE             | 2268 | chr6  | - |
| uc003ggd.1      | C4orf10       | UCSC_knowngene      | 2766 | chr4  | + |
| NR_047677       | TARS          | RefSeq              | 2714 | chr5  | + |
| NR_047677       | TARS          | RefSeq              | 2714 | chr5  | + |
| NR_047677       | TARS          | RefSeq              | 2714 | chr5  | + |
| ENST00000508878 | CTC-228N24.3  | GENCODE             | 968  | chr5  | - |
| ENST00000508878 | CTC-228N24.3  | GENCODE             | 968  | chr5  | - |
| ENST00000443162 | AC004854.4    | GENCODE             | 188  | chr7  | + |
| ENST00000443162 | AC004854.4    | GENCODE             | 188  | chr7  | + |
| ENST00000443162 | AC004854.4    | GENCODE             | 188  | chr7  | + |
| ENST00000443162 | AC004854.4    | GENCODE             | 188  | chr7  | + |
| ENST00000443162 | AC004854.4    | GENCODE             | 188  | chr7  | + |
| ENST00000443162 | AC004854.4    | GENCODE             | 188  | chr7  | + |
| ENST00000513652 | RP11-472B18.1 | GENCODE             | 1532 | chr4  | + |
| BX104325        |               | LincRNAs identified | 451  | chr1  | - |
| ENST00000440874 | TRIM31-AS1    | GENCODE             | 549  | chr6  | + |
| ENST00000582866 | RP11-498C9.15 | GENCODE             | 2682 | chr17 | - |
| ENST00000574080 | RP11-388C12.2 | GENCODE             | 2450 | chr17 | - |
| ENST00000447623 | RP11-263K19.4 | GENCODE             | 541  | chr1  | + |
| ENST00000447623 | RP11-263K19.4 | GENCODE             | 541  | chr1  | + |
| ENST00000447623 | RP11-263K19.4 | GENCODE             | 541  | chr1  | + |
| ENST00000414844 | PLCL2-AS1     | GENCODE             | 277  | chr3  | - |
| ENST00000414844 | PLCL2-AS1     | GENCODE             | 277  | chr3  | - |
| ENST00000441360 | RP4-781K5.5   | GENCODE             | 933  | chr1  | + |
| ENST00000434796 | GAS5          | GENCODE             | 575  | chr1  | - |
| ENST00000418353 | RP11-135A1.2  | GENCODE             | 430  | chr3  | - |
| uc003emd.1      | RPL32P3       | UCSC_knowngene      | 2836 | chr3  | - |
| ENST00000533253 | CTD-2523D13.2 | GENCODE             | 523  | chr11 | + |
| ENST00000533253 | CTD-2523D13.2 | GENCODE             | 523  | chr11 | + |
| ENST00000533253 | CTD-2523D13.2 | GENCODE             | 523  | chr11 | + |
| ENST00000438158 | RP11-400N13.3 | GENCODE             | 562  | chr1  | - |
| ENST00000430825 | AC005534.9    | GENCODE             | 514  | chr7  | - |
| ENST00000430825 | AC005534.9    | GENCODE             | 514  | chr7  | - |
| ENST00000430825 | AC005534.9    | GENCODE             | 514  | chr7  | - |
| ENST00000552634 | RP11-474P2.4  | GENCODE             | 562  | chr12 | - |
| ENST00000451443 | PLCB1-IT1     | GENCODE             | 251  | chr20 | + |
| ENST00000451443 | PLCB1-IT1     | GENCODE             | 251  | chr20 | + |
| NR_047691       | PIGT          | RefSeq              | 2206 | chr20 | + |
| NR_047691       | PIGT          | RefSeq              | 2206 | chr20 | + |
| NR_047691       | PIGT          | RefSeq              | 2206 | chr20 | + |
| NR_047691       | PIGT          | RefSeq              | 2206 | chr20 | + |
| uc003lzi.3      | BC035392      | UCSC_knowngene      | 1269 | chr5  | - |
| uc003lzi.3      | BC035392      | UCSC_knowngene      | 1269 | chr5  | - |

|           |           |                  |                                                 |
|-----------|-----------|------------------|-------------------------------------------------|
| 1369255   | 1372828   | ENST00000567829  | CATTTAGAAAGTTCCTGTATTCCTAA]natural antisense    |
| 125821760 | 125825832 |                  | ACCTCCAGCTGGGATATCCAGCTCC' natural antisense    |
| 75543022  | 75561103  |                  | ATCTCCTTCCCAC 100507351 intergenic              |
| 101949792 | 101950504 |                  | TATATCCCTGAGTAACGGCAGATAA intronic antisense    |
| 66742303  | 66759357  | ENST00000446288, | AGGTTACTTGTTTATTAGTAGTAGT]intergenic            |
| 133136445 | 133138490 |                  | GGGATGAAGGTT. 594839 exon sense-overlappi       |
| 54329111  | 54333427  |                  | GATACCCAGCTC] 100874366 natural antisense       |
| 177309443 | 177348388 |                  | ATCAAAACAACCTCATTGTTCTCAA' intergenic           |
| 24863137  | 24865371  |                  | GACTATATTCTTAAAGAATAAAAAGT natural antisense    |
| 24863137  | 24865371  |                  | GACTATATTCTTAAAGAATAAAAAGT natural antisense    |
| 24863137  | 24865371  |                  | GACTATATTCTTAAAGAATAAAAAGT natural antisense    |
| 24863137  | 24865371  |                  | GACTATATTCTTAAAGAATAAAAAGT natural antisense    |
| 24863137  | 24865371  |                  | GACTATATTCTTAAAGAATAAAAAGT natural antisense    |
| 24863137  | 24865371  |                  | GACTATATTCTTAAAGAATAAAAAGT natural antisense    |
| 24863137  | 24865371  |                  | GACTATATTCTTAAAGAATAAAAAGT natural antisense    |
| 24863137  | 24865371  |                  | GACTATATTCTTAAAGAATAAAAAGT natural antisense    |
| 24863137  | 24865371  |                  | GACTATATTCTTAAAGAATAAAAAGT natural antisense    |
| 24863137  | 24865371  |                  | GACTATATTCTTAAAGAATAAAAAGT natural antisense    |
| 24863137  | 24865371  |                  | GACTATATTCTTAAAGAATAAAAAGT natural antisense    |
| 64201007  | 64209643  | TCONS_00021811,  | 'CTTTAATCTGAGAATCTTACGTCTTC intergenic          |
| 3944493   | 3957121   | NR_024253        | GCAGAGGCCCGCCAGGCCAGGATC' intergenic            |
| 96023058  | 96025326  |                  | ATTTATTGAGTATCTTTCATTATATT bidirectional        |
| 2936625   | 2943596   | ENST00000505731  | CGCCGGTCTGCTGC 317648 natural antisense         |
| 33440881  | 33468196  |                  | GTGGAATTAGCC. 6897 exon sense-overlappi         |
| 33440881  | 33468196  |                  | GTGGAATTAGCC. 6897 exon sense-overlappi         |
| 33440881  | 33468196  |                  | GTGGAATTAGCC. 6897 exon sense-overlappi         |
| 127359718 | 127418652 |                  | TTGGCAGAAGCTGTTTGAAAATGCTA' bidirectional       |
| 127359718 | 127418652 |                  | TTGGCAGAAGCTGTTTGAAAATGCTA' bidirectional       |
| 44888014  | 44889167  |                  | GTTTGGGGAGGTTAAAATTTGGAGC bidirectional         |
| 44888014  | 44889167  |                  | GTTTGGGGAGGTTAAAATTTGGAGC bidirectional         |
| 44888014  | 44889167  |                  | GTTTGGGGAGGTTAAAATTTGGAGC bidirectional         |
| 44888014  | 44889167  |                  | GTTTGGGGAGGTTAAAATTTGGAGC bidirectional         |
| 44888014  | 44889167  |                  | GTTTGGGGAGGTTAAAATTTGGAGC bidirectional         |
| 44888014  | 44889167  |                  | GTTTGGGGAGGTTAAAATTTGGAGC bidirectional         |
| 39481874  | 39483525  |                  | AGAGTGGCTGATGACAAAACCTTGA intergenic            |
| 109073813 | 109074249 |                  | TGAACCTGGAAGCTTATTCCTTTC intergenic             |
| 30073016  | 30082501  |                  | TAGAGACACTACTAATTGTTCCAGC' natural antisense    |
| 79836300  | 79838982  |                  | GCCTAAGGTAGGCCAGAGTTAATTT intergenic            |
| 80631872  | 80634364  |                  | GTTGTTGCGTTTCTAGTTTGTCCAC intron sense-overlapp |
| 155166658 | 155170137 |                  | AGTCCCACAGGCTTACCATCTGAGT] natural antisense    |
| 155166658 | 155170137 |                  | AGTCCCACAGGCTTACCATCTGAGT] natural antisense    |
| 155166658 | 155170137 |                  | AGTCCCACAGGCTTACCATCTGAGT] natural antisense    |
| 17084267  | 17085684  |                  | TATTATGGTCAGTACCTGAAAGCTC. natural antisense    |
| 17084267  | 17085684  |                  | TATTATGGTCAGTACCTGAAAGCTC. natural antisense    |
| 234796016 | 234802850 |                  | AGTACCATTTGCAAATGGCTCTTGC' intergenic           |
| 173833117 | 173834039 | ENST00000422183, | CTGATATTCTGC' 60674 intergenic                  |
| 193848404 | 193848990 |                  | CCCTGAAATGGAATTTCAACGTGTG' intergenic           |
| 129109997 | 129118282 |                  | GAGTTAAGAGCA' 132241 intergenic                 |
| 119600292 | 119610333 |                  | AACAACGTGGGTTAATATTAATGCC bidirectional         |
| 119600292 | 119610333 |                  | AACAACGTGGGTTAATATTAATGCC bidirectional         |
| 119600292 | 119610333 |                  | AACAACGTGGGTTAATATTAATGCC bidirectional         |
| 222215046 | 222238105 |                  | TGGTCAGTGCTCAACAAATGCCCT. intergenic            |
| 156461645 | 156469257 |                  | CAGTTCGCATAGACTTTTCATGCAG' natural antisense    |
| 156461645 | 156469257 |                  | CAGTTCGCATAGACTTTTCATGCAG' natural antisense    |
| 156461645 | 156469257 |                  | CAGTTCGCATAGACTTTTCATGCAG' natural antisense    |
| 46778015  | 46780774  |                  | CTAATTTGTTTCATACAATGGATATC( intergenic          |
| 8229371   | 8237564   |                  | GGCTGAGCTCCTACTAAAAAGAAGA intron sense-overlapp |
| 8229371   | 8237564   |                  | GGCTGAGCTCCTACTAAAAAGAAGA intron sense-overlapp |
| 44044706  | 44054885  |                  | GCCCCATCAGTG' 51604 exon sense-overlappi        |
| 44044706  | 44054885  |                  | GCCCCATCAGTG' 51604 exon sense-overlappi        |
| 44044706  | 44054885  |                  | GCCCCATCAGTG' 51604 exon sense-overlappi        |
| 44044706  | 44054885  |                  | GCCCCATCAGTG' 51604 exon sense-overlappi        |
| 162909609 | 162921064 |                  | GTTCTCCAGCTTAAGATCTTCTATCT natural antisense    |
| 162909609 | 162921064 |                  | GTTCTCCAGCTTAAGATCTTCTATCT natural antisense    |



|                 |         |                               |           |           |
|-----------------|---------|-------------------------------|-----------|-----------|
| NM_194261       | UBE2I   | SUMO-conjugating $\epsilon$ + | 1359153   | 1377019   |
| ENST00000392693 | CDON    | Cdon homolog (mou)-           | 125825690 | 125933187 |
| NM_001278       | CHUK    | inhibitor of nuclear f-       | 101948123 | 101989344 |
| NM_001016       | RPS12   | 40S ribosomal protei+         | 133135707 | 133138703 |
| NM_017410       | HOXC13  | homeobox protein Hu+          | 54332575  | 54340328  |
| NM_001251977    | RCAN3   | calcipressin-3 isoforr+       | 24829386  | 24863510  |
| NM_001251978    | RCAN3   | calcipressin-3 isoforr+       | 24834083  | 24863510  |
| NM_001251979    | RCAN3   | calcipressin-3 isoforr+       | 24828840  | 24863510  |
| NM_001251980    | RCAN3   | calcipressin-3 isoforr+       | 24840803  | 24863510  |
| NM_001251981    | RCAN3   | calcipressin-3 isoforr+       | 24829386  | 24863510  |
| NM_001251982    | RCAN3   | calcipressin-3 isoforr+       | 24840803  | 24863510  |
| NM_001251983    | RCAN3   | calcipressin-3 isoforr+       | 24829386  | 24863510  |
| NM_001251984    | RCAN3   | calcipressin-3 isoforr+       | 24828840  | 24863510  |
| NM_001251985    | RCAN3   | calcipressin-3 isoforr+       | 24840803  | 24863510  |
| NM_013441       | RCAN3   | calcipressin-3 isoforr+       | 24829386  | 24863510  |
| NM_024641       | MANEA   | glycoprotein endo-alj+        | 96025372  | 96057328  |
| NM_003703       | NOPI4   | nucleolar protein 14 -        | 2939663   | 2965118   |
| NM_001258437    | TARS    | threonine--tRNA liga+         | 33440801  | 33468196  |
| NM_001258438    | TARS    | threonine--tRNA liga+         | 33440881  | 33468196  |
| NM_152295       | TARS    | threonine--tRNA liga+         | 33440881  | 33468196  |
| NM_001046       | SLC12A2 | solute carrier family +       | 127419482 | 127525380 |
| NM_001256461    | SLC12A2 | solute carrier family +       | 127419482 | 127525380 |
| NM_012412       | H2AFV   | histone H2A.V isofor-         | 44873212  | 44887725  |
| NM_138635       | H2AFV   | histone H2A.V isofor-         | 44866487  | 44887725  |
| NM_201436       | H2AFV   | histone H2A.V isofor-         | 44873212  | 44887725  |
| NM_201516       | H2AFV   | histone H2A.V isofor-         | 44873212  | 44887725  |
| NM_201517       | H2AFV   | histone H2A.V isofor-         | 44873212  | 44887725  |
| NM_007028       | TRIM31  | E3 ubiquitin-protein -        | 30070673  | 30080867  |
| NM_006822       | RAB40B  | ras-related protein Ra-       | 80614942  | 80656598  |
| NM_001252607    | THBS3   | thrombospondin-3 is-          | 155165378 | 155177772 |
| NM_001252608    | THBS3   | thrombospondin-3 is-          | 155165378 | 155177772 |
| NM_007112       | THBS3   | thrombospondin-3 is-          | 155165378 | 155177772 |
| NM_001144382    | PLCL2   | inactive phospholipa+         | 16926451  | 17132098  |
| NM_015184       | PLCL2   | inactive phospholipa+         | 16974581  | 17132098  |
| NM_002855       | PVRL1   | poliovirus receptor-r-        | 119531702 | 119599435 |
| NM_203285       | PVRL1   | poliovirus receptor-r-        | 119508807 | 119599435 |
| NM_203286       | PVRL1   | poliovirus receptor-r-        | 119545098 | 119599435 |
| NM_001184996    | RNF32   | RING finger protein +         | 156433440 | 156469820 |
| NM_001184997    | RNF32   | RING finger protein +         | 156435670 | 156469820 |
| NM_030936       | RNF32   | RING finger protein +         | 156433352 | 156469820 |
| NM_015192       | PLCB1   | 1-phosphatidylinosit+         | 8113295   | 8865547   |
| NM_182734       | PLCB1   | 1-phosphatidylinosit+         | 8113295   | 8865547   |
| NM_001184728    | PIGT    | GPI transamidase coi+         | 44044706  | 44054885  |
| NM_001184729    | PIGT    | GPI transamidase coi+         | 44044706  | 44054885  |
| NM_001184730    | PIGT    | GPI transamidase coi+         | 44044706  | 44054885  |
| NM_015937       | PIGT    | GPI transamidase coi+         | 44044706  | 44054885  |
| NM_001142556    | HMMR    | hyaluronan mediated +         | 162887516 | 162918953 |
| NM_001142557    | HMMR    | hyaluronan mediated +         | 162887516 | 162918953 |

|             |             |           |           |            |           |
|-------------|-------------|-----------|-----------|------------|-----------|
| 53.002679   | 14.808531   | 5.379473  | 4.180414  | 57.191807  | 56.350597 |
| 725.149293  | 166.593357  | 9.019224  | 7.512089  | 760.1759   | 895.5393  |
| 13913.92328 | 3901.25205  | 13.015125 | 10.399683 | 14799.326  | 15748.559 |
| 25.989447   | 6.516574    | 4.123042  | 2.69191   | 27.607443  | 62.43328  |
| 57.091145   | 10.586371   | 5.153815  | 3.44944   | 22.354574  | 13.399021 |
| 4992.828983 | 831.415178  | 11.820347 | 10.082869 | 4756.1865  | 5660.7437 |
| 12815.84767 | 2872.390787 | 13.015047 | 9.915468  | 12378.04   | 14972.114 |
| 2951.627117 | 761.860788  | 11.050694 | 9.933096  | 2712.6838  | 3740.832  |
| 757.592543  | 222.188453  | 9.072708  | 8.026798  | 863.9332   | 367.95926 |
| 757.592543  | 222.188453  | 9.072708  | 8.026798  | 863.9332   | 367.95926 |
| 757.592543  | 222.188453  | 9.072708  | 8.026798  | 863.9332   | 367.95926 |
| 757.592543  | 222.188453  | 9.072708  | 8.026798  | 863.9332   | 367.95926 |
| 757.592543  | 222.188453  | 9.072708  | 8.026798  | 863.9332   | 367.95926 |
| 757.592543  | 222.188453  | 9.072708  | 8.026798  | 863.9332   | 367.95926 |
| 757.592543  | 222.188453  | 9.072708  | 8.026798  | 863.9332   | 367.95926 |
| 757.592543  | 222.188453  | 9.072708  | 8.026798  | 863.9332   | 367.95926 |
| 757.592543  | 222.188453  | 9.072708  | 8.026798  | 863.9332   | 367.95926 |
| 757.592543  | 222.188453  | 9.072708  | 8.026798  | 863.9332   | 367.95926 |
| 1055.486328 | 213.684608  | 9.233861  | 7.903954  | 1507.7194  | 2377.3938 |
| 277.071353  | 81.063309   | 7.668492  | 6.53724   | 259.78964  | 373.2355  |
| 50.230419   | 11.300688   | 5.186052  | 3.432538  | 45.965942  | 17.821533 |
| 90.87965    | 28.407851   | 5.980678  | 4.923456  | 120.767075 | 113.67522 |
| 1457.765417 | 351.515405  | 10.073516 | 8.778384  | 1195.2446  | 1200.9938 |
| 1457.765417 | 351.515405  | 10.073516 | 8.778384  | 1195.2446  | 1200.9938 |
| 1457.765417 | 351.515405  | 10.073516 | 8.778384  | 1195.2446  | 1200.9938 |
| 63.934159   | 23.862327   | 5.629061  | 4.397737  | 72.832     | 55.042553 |
| 63.934159   | 23.862327   | 5.629061  | 4.397737  | 72.832     | 55.042553 |
| 27.23401    | 8.157851    | 4.296176  | 3.094434  | 37.716415  | 19.93985  |
| 27.23401    | 8.157851    | 4.296176  | 3.094434  | 37.716415  | 19.93985  |
| 27.23401    | 8.157851    | 4.296176  | 3.094434  | 37.716415  | 19.93985  |
| 27.23401    | 8.157851    | 4.296176  | 3.094434  | 37.716415  | 19.93985  |
| 27.23401    | 8.157851    | 4.296176  | 3.094434  | 37.716415  | 19.93985  |
| 27.23401    | 8.157851    | 4.296176  | 3.094434  | 37.716415  | 19.93985  |
| 71.268863   | 13.860363   | 5.726076  | 3.994813  | 72.265884  | 105.91966 |
| 1814.886967 | 47.619901   | 10.139159 | 5.657965  | 1363.6049  | 319.6461  |
| 306.414867  | 89.950876   | 7.857977  | 6.611451  | 335.7221   | 297.01297 |
| 2454.0264   | 584.172547  | 10.810767 | 9.445987  | 2327.0664  | 1495.437  |
| 45.979578   | 8.64409     | 5.033973  | 3.151964  | 54.212616  | 21.427958 |
| 47.733701   | 15.821629   | 5.232224  | 4.206394  | 53.3272    | 42.421227 |
| 47.733701   | 15.821629   | 5.232224  | 4.206394  | 53.3272    | 42.421227 |
| 47.733701   | 15.821629   | 5.232224  | 4.206394  | 53.3272    | 42.421227 |
| 4410.473908 | 716.519497  | 11.263295 | 9.240425  | 5499.054   | 9106.442  |
| 4410.473908 | 716.519497  | 11.263295 | 9.240425  | 5499.054   | 9106.442  |
| 135.12299   | 27.515007   | 6.337948  | 5.073615  | 202.77968  | 60.4639   |
| 6904.48915  | 1283.601707 | 12.225917 | 10.690934 | 5145.8647  | 5101.1387 |
| 2926.842625 | 481.019348  | 10.720898 | 9.023705  | 1622.7238  | 902.48645 |
| 722.222835  | 155.78504   | 8.947381  | 7.432372  | 517.9645   | 473.65863 |
| 70.730118   | 15.44687    | 5.712767  | 4.085735  | 60.785583  | 47.934345 |
| 70.730118   | 15.44687    | 5.712767  | 4.085735  | 60.785583  | 47.934345 |
| 70.730118   | 15.44687    | 5.712767  | 4.085735  | 60.785583  | 47.934345 |
| 172.035638  | 7.038586    | 6.096683  | 2.913922  | 271.10635  | 6.309858  |
| 647.000322  | 179.903402  | 8.791574  | 7.736957  | 720.7398   | 434.022   |
| 647.000322  | 179.903402  | 8.791574  | 7.736957  | 720.7398   | 434.022   |
| 647.000322  | 179.903402  | 8.791574  | 7.736957  | 720.7398   | 434.022   |
| 53.305199   | 15.227301   | 5.288143  | 4.026339  | 34.086403  | 63.726273 |
| 73.912489   | 17.697355   | 5.809137  | 4.351584  | 66.95798   | 65.01002  |
| 73.912489   | 17.697355   | 5.809137  | 4.351584  | 66.95798   | 65.01002  |
| 233.065127  | 48.240218   | 7.474265  | 5.795853  | 291.14664  | 293.75064 |
| 233.065127  | 48.240218   | 7.474265  | 5.795853  | 291.14664  | 293.75064 |
| 233.065127  | 48.240218   | 7.474265  | 5.795853  | 291.14664  | 293.75064 |
| 233.065127  | 48.240218   | 7.474265  | 5.795853  | 291.14664  | 293.75064 |
| 35.743354   | 8.217428    | 4.761431  | 3.013996  | 28.848679  | 30.931328 |
| 35.743354   | 8.217428    | 4.761431  | 3.013996  | 28.848679  | 30.931328 |

|            |           |           |           |            |           |
|------------|-----------|-----------|-----------|------------|-----------|
| 42.607723  | 47.43941  | 52.499905 | 61.92663  | 15.479751  | 15.680587 |
| 549.77856  | 313.6906  | 997.0619  | 834.6495  | 186.89818  | 84.88416  |
| 8069.3203  | 2372.5144 | 23510.957 | 18982.863 | 4465.2495  | 381.24875 |
| 16.008781  | 14.471288 | 23.212759 | 12.203132 | 6.7814054  | 4.9999995 |
| 37.755577  | 58.68411  | 106.3977  | 103.95589 | 4.9999995  | 10.518751 |
| 3685.8757  | 6359.674  | 3609.788  | 5884.706  | 770.88     | 695.4192  |
| 8738.767   | 3422.01   | 21329.447 | 16054.708 | 3781.437   | 309.89276 |
| 1538.725   | 3446.9834 | 2602.3945 | 3668.144  | 686.7355   | 459.09335 |
| 1201.367   | 862.627   | 451.20206 | 798.46674 | 174.92607  | 73.91312  |
| 1201.367   | 862.627   | 451.20206 | 798.46674 | 174.92607  | 73.91312  |
| 1201.367   | 862.627   | 451.20206 | 798.46674 | 174.92607  | 73.91312  |
| 1201.367   | 862.627   | 451.20206 | 798.46674 | 174.92607  | 73.91312  |
| 1201.367   | 862.627   | 451.20206 | 798.46674 | 174.92607  | 73.91312  |
| 1201.367   | 862.627   | 451.20206 | 798.46674 | 174.92607  | 73.91312  |
| 1201.367   | 862.627   | 451.20206 | 798.46674 | 174.92607  | 73.91312  |
| 1201.367   | 862.627   | 451.20206 | 798.46674 | 174.92607  | 73.91312  |
| 1201.367   | 862.627   | 451.20206 | 798.46674 | 174.92607  | 73.91312  |
| 1201.367   | 862.627   | 451.20206 | 798.46674 | 174.92607  | 73.91312  |
| 394.5876   | 213.13037 | 1048.2712 | 791.8156  | 246.54926  | 136.69704 |
| 128.58218  | 343.50894 | 232.66066 | 324.6512  | 49.677906  | 64.15546  |
| 79.76172   | 73.123764 | 30.968155 | 53.7414   | 11.077641  | 4.9999995 |
| 52.32461   | 30.941002 | 121.48569 | 106.0843  | 37.701458  | 22.200912 |
| 1197.2769  | 1312.9236 | 1853.3809 | 1986.7727 | 323.2191   | 293.51712 |
| 1197.2769  | 1312.9236 | 1853.3809 | 1986.7727 | 323.2191   | 293.51712 |
| 1197.2769  | 1312.9236 | 1853.3809 | 1986.7727 | 323.2191   | 293.51712 |
| 79.455185  | 71.66245  | 36.413544 | 68.19922  | 23.6171    | 4.9999995 |
| 79.455185  | 71.66245  | 36.413544 | 68.19922  | 23.6171    | 4.9999995 |
| 49.29739   | 26.370785 | 9.707961  | 20.37166  | 10.838692  | 4.9999995 |
| 49.29739   | 26.370785 | 9.707961  | 20.37166  | 10.838692  | 4.9999995 |
| 49.29739   | 26.370785 | 9.707961  | 20.37166  | 10.838692  | 4.9999995 |
| 49.29739   | 26.370785 | 9.707961  | 20.37166  | 10.838692  | 4.9999995 |
| 49.29739   | 26.370785 | 9.707961  | 20.37166  | 10.838692  | 4.9999995 |
| 49.29739   | 26.370785 | 9.707961  | 20.37166  | 10.838692  | 4.9999995 |
| 31.508762  | 70.33921  | 68.45055  | 79.12911  | 19.00467   | 11.923931 |
| 2183.7908  | 3200.6365 | 1343.9204 | 2477.7231 | 25.307428  | 22.370539 |
| 366.4298   | 179.1341  | 330.86133 | 329.3289  | 88.78903   | 27.759644 |
| 2879.552   | 2593.8005 | 2262.6038 | 3165.6987 | 587.46747  | 251.72017 |
| 89.123474  | 55.75417  | 21.555641 | 33.803608 | 11.0762205 | 4.9999995 |
| 33.754818  | 60.319305 | 46.963337 | 49.61632  | 14.558818  | 7.5885377 |
| 33.754818  | 60.319305 | 46.963337 | 49.61632  | 14.558818  | 7.5885377 |
| 33.754818  | 60.319305 | 46.963337 | 49.61632  | 14.558818  | 7.5885377 |
| 1509.6631  | 765.15485 | 5487.5503 | 4094.9792 | 977.4438   | 282.93655 |
| 1509.6631  | 765.15485 | 5487.5503 | 4094.9792 | 977.4438   | 282.93655 |
| 351.98676  | 84.722855 | 50.542824 | 60.24192  | 21.546219  | 22.774055 |
| 5366.2305  | 12031.494 | 4632.858  | 9149.349  | 972.3495   | 882.10364 |
| 2225.3416  | 7106.154  | 1125.8514 | 4578.4985 | 541.6649   | 125.77546 |
| 413.58704  | 1383.3875 | 474.56784 | 1070.1715 | 143.65489  | 44.92849  |
| 74.113754  | 39.232834 | 103.44841 | 98.86578  | 7.709773   | 7.7057214 |
| 74.113754  | 39.232834 | 103.44841 | 98.86578  | 7.709773   | 7.7057214 |
| 74.113754  | 39.232834 | 103.44841 | 98.86578  | 7.709773   | 7.7057214 |
| 506.66623  | 37.455982 | 111.09499 | 99.58042  | 4.9999995  | 5.2530656 |
| 1000.11224 | 889.5731  | 211.92659 | 625.6282  | 207.41066  | 110.82166 |
| 1000.11224 | 889.5731  | 211.92659 | 625.6282  | 207.41066  | 110.82166 |
| 1000.11224 | 889.5731  | 211.92659 | 625.6282  | 207.41066  | 110.82166 |
| 33.814972  | 89.876434 | 30.924183 | 67.40293  | 16.60677   | 5.4488463 |
| 44.057205  | 105.49558 | 62.33907  | 99.61508  | 17.88791   | 26.805218 |
| 44.057205  | 105.49558 | 62.33907  | 99.61508  | 17.88791   | 26.805218 |
| 231.45479  | 185.95593 | 162.33284 | 233.74992 | 53.225773  | 27.388329 |
| 231.45479  | 185.95593 | 162.33284 | 233.74992 | 53.225773  | 27.388329 |
| 231.45479  | 185.95593 | 162.33284 | 233.74992 | 53.225773  | 27.388329 |
| 231.45479  | 185.95593 | 162.33284 | 233.74992 | 53.225773  | 27.388329 |
| 21.349968  | 63.77368  | 27.395817 | 42.160652 | 4.9999995  | 4.9999995 |
| 21.349968  | 63.77368  | 27.395817 | 42.160652 | 4.9999995  | 4.9999995 |

|           |            |           |           |            |           |
|-----------|------------|-----------|-----------|------------|-----------|
| 17.336758 | 15.493008  | 12.868431 | 11.99265  | 5.376331   | 5.6640077 |
| 381.3377  | 94.47174   | 147.23903 | 104.72933 | 9.1064625  | 9.46992   |
| 17406.717 | 239.98418  | 648.7905  | 265.52237 | 13.394678  | 13.479052 |
| 12.318039 | 4.9999995  | 4.9999995 | 4.9999995 | 4.3335614  | 5.798473  |
| 4.9999995 | 19.225203  | 6.139235  | 17.635038 | 4.020041   | 3.7846107 |
| 851.89197 | 813.558    | 1069.1802 | 787.5617  | 11.734996  | 12.005853 |
| 12307.131 | 130.26776  | 526.2262  | 179.39    | 13.140427  | 13.406784 |
| 930.59094 | 839.25867  | 905.71967 | 749.7666  | 10.919979  | 11.453988 |
| 295.9519  | 235.83542  | 323.35202 | 229.15219 | 9.291906   | 8.229831  |
| 295.9519  | 235.83542  | 323.35202 | 229.15219 | 9.291906   | 8.229831  |
| 295.9519  | 235.83542  | 323.35202 | 229.15219 | 9.291906   | 8.229831  |
| 295.9519  | 235.83542  | 323.35202 | 229.15219 | 9.291906   | 8.229831  |
| 295.9519  | 235.83542  | 323.35202 | 229.15219 | 9.291906   | 8.229831  |
| 295.9519  | 235.83542  | 323.35202 | 229.15219 | 9.291906   | 8.229831  |
| 295.9519  | 235.83542  | 323.35202 | 229.15219 | 9.291906   | 8.229831  |
| 295.9519  | 235.83542  | 323.35202 | 229.15219 | 9.291906   | 8.229831  |
| 295.9519  | 235.83542  | 323.35202 | 229.15219 | 9.291906   | 8.229831  |
| 295.9519  | 235.83542  | 323.35202 | 229.15219 | 9.291906   | 8.229831  |
| 456.5829  | 105.32313  | 214.15892 | 122.7964  | 10.0934725 | 10.785746 |
| 31.923    | 113.297386 | 133.28667 | 94.03943  | 7.563295   | 8.251866  |
| 25.89481  | 7.760083   | 12.178781 | 5.8928156 | 5.062407   | 4.1532216 |
| 59.515423 | 12.864538  | 21.537909 | 16.626865 | 6.465655   | 6.607797  |
| 344.9279  | 236.79865  | 579.25616 | 331.3735  | 9.74544    | 9.871557  |
| 344.9279  | 236.79865  | 579.25616 | 331.3735  | 9.74544    | 9.871557  |
| 344.9279  | 236.79865  | 579.25616 | 331.3735  | 9.74544    | 9.871557  |
| 59.961613 | 17.60582   | 20.81137  | 16.178062 | 5.7290196  | 5.6347795 |
| 59.961613 | 17.60582   | 20.81137  | 16.178062 | 5.7290196  | 5.6347795 |
| 10.731818 | 7.5137496  | 4.9999995 | 9.86285   | 4.773218   | 4.2965393 |
| 10.731818 | 7.5137496  | 4.9999995 | 9.86285   | 4.773218   | 4.2965393 |
| 10.731818 | 7.5137496  | 4.9999995 | 9.86285   | 4.773218   | 4.2965393 |
| 10.731818 | 7.5137496  | 4.9999995 | 9.86285   | 4.773218   | 4.2965393 |
| 10.731818 | 7.5137496  | 4.9999995 | 9.86285   | 4.773218   | 4.2965393 |
| 16.2406   | 8.698692   | 19.234833 | 8.059453  | 5.716444   | 6.509448  |
| 29.867727 | 114.99821  | 30.155855 | 63.01965  | 9.947801   | 8.041696  |
| 157.91692 | 53.7929    | 131.80232 | 79.64444  | 7.9381137  | 7.9442644 |
| 990.66754 | 443.776    | 761.7388  | 469.6653  | 10.710357  | 10.167695 |
| 16.880672 | 6.149128   | 5.76865   | 6.98987   | 5.294453   | 4.386631  |
| 19.9792   | 19.745579  | 13.09513  | 19.962507 | 5.2699757  | 5.295855  |
| 19.9792   | 19.745579  | 13.09513  | 19.962507 | 5.2699757  | 5.295855  |
| 19.9792   | 19.745579  | 13.09513  | 19.962507 | 5.2699757  | 5.295855  |
| 2189.1833 | 186.73819  | 477.21124 | 185.6039  | 11.918303  | 12.692435 |
| 2189.1833 | 186.73819  | 477.21124 | 185.6039  | 11.918303  | 12.692435 |
| 35.075424 | 36.306023  | 23.717775 | 25.670547 | 7.210077   | 5.755888  |
| 1062.2369 | 1578.9879  | 1768.9764 | 1436.9559 | 11.836764  | 11.854132 |
| 1042.2255 | 345.32373  | 494.89423 | 336.23227 | 10.1974325 | 9.483771  |
| 307.1615  | 128.89345  | 168.30505 | 141.76686 | 8.533712   | 8.580712  |
| 12.9312   | 15.583692  | 28.324207 | 20.426624 | 5.466432   | 5.455357  |
| 12.9312   | 15.583692  | 28.324207 | 20.426624 | 5.466432   | 5.455357  |
| 12.9312   | 15.583692  | 28.324207 | 20.426624 | 5.466432   | 5.455357  |
| 4.9999995 | 12.0049515 | 4.9999995 | 9.973499  | 7.624617   | 2.832375  |
| 335.4812  | 161.29129  | 141.32378 | 123.09182 | 9.02409    | 8.454784  |
| 335.4812  | 161.29129  | 141.32378 | 123.09182 | 9.02409    | 8.454784  |
| 335.4812  | 161.29129  | 141.32378 | 123.09182 | 9.02409    | 8.454784  |
| 30.52682  | 13.307809  | 14.161841 | 11.311721 | 4.628864   | 5.8234944 |
| 8.621654  | 25.971197  | 10.11073  | 16.787422 | 5.6060705  | 5.8498836 |
| 8.621654  | 25.971197  | 10.11073  | 16.787422 | 5.6060705  | 5.8498836 |
| 85.852715 | 33.31486   | 56.694847 | 32.964787 | 7.731335   | 7.9285445 |
| 85.852715 | 33.31486   | 56.694847 | 32.964787 | 7.731335   | 7.9285445 |
| 85.852715 | 33.31486   | 56.694847 | 32.964787 | 7.731335   | 7.9285445 |
| 85.852715 | 33.31486   | 56.694847 | 32.964787 | 7.731335   | 7.9285445 |
| 6.108042  | 19.773014  | 7.482897  | 5.9406147 | 4.3974247  | 4.88498   |
| 6.108042  | 19.773014  | 7.482897  | 5.9406147 | 4.3974247  | 4.88498   |

|           |           |            |            |            |           |
|-----------|-----------|------------|------------|------------|-----------|
| 5.090735  | 5.167788  | 5.5333614  | 5.444613   | 4.1845884  | 4.788298  |
| 8.745526  | 7.9707837 | 9.701546   | 9.121104   | 7.791901   | 7.259163  |
| 12.613105 | 10.872356 | 14.151086  | 13.580471  | 12.4406595 | 9.445841  |
| 3.683047  | 3.2871265 | 4.4266796  | 3.209366   | 2.959929   | 2.4279919 |
| 4.9250574 | 5.493587  | 6.5181217  | 6.1814694  | 2.3467326  | 4.181725  |
| 11.484203 | 12.292572 | 11.515345  | 11.889115  | 9.8901825  | 10.293598 |
| 12.757199 | 11.400835 | 14.03268   | 13.352356  | 12.17855   | 9.132697  |
| 10.219658 | 11.413313 | 11.0663395 | 11.2308855 | 9.715997   | 9.711583  |
| 9.862339  | 9.430864  | 8.5582695  | 9.063037   | 7.70298    | 7.052748  |
| 9.862339  | 9.430864  | 8.5582695  | 9.063037   | 7.70298    | 7.052748  |
| 9.862339  | 9.430864  | 8.5582695  | 9.063037   | 7.70298    | 7.052748  |
| 9.862339  | 9.430864  | 8.5582695  | 9.063037   | 7.70298    | 7.052748  |
| 9.862339  | 9.430864  | 8.5582695  | 9.063037   | 7.70298    | 7.052748  |
| 9.862339  | 9.430864  | 8.5582695  | 9.063037   | 7.70298    | 7.052748  |
| 9.862339  | 9.430864  | 8.5582695  | 9.063037   | 7.70298    | 7.052748  |
| 9.862339  | 9.430864  | 8.5582695  | 9.063037   | 7.70298    | 7.052748  |
| 9.862339  | 9.430864  | 8.5582695  | 9.063037   | 7.70298    | 7.052748  |
| 9.862339  | 9.430864  | 8.5582695  | 9.063037   | 7.70298    | 7.052748  |
| 8.273411  | 7.424325  | 9.776927   | 9.049282   | 8.203857   | 7.942898  |
| 6.6842723 | 8.101908  | 7.6162686  | 7.793345   | 5.8680654  | 6.8609214 |
| 6.002259  | 5.8310738 | 4.8101873  | 5.257166   | 3.6997714  | 2.4279919 |
| 5.391615  | 4.505154  | 6.703521   | 6.210328   | 5.4731145  | 5.301784  |
| 9.8578415 | 10.037063 | 10.55558   | 10.373614  | 8.604717   | 9.059559  |
| 9.8578415 | 10.037063 | 10.55558   | 10.373614  | 8.604717   | 9.059559  |
| 9.8578415 | 10.037063 | 10.55558   | 10.373614  | 8.604717   | 9.059559  |
| 5.9956584 | 5.799695  | 5.0341306  | 5.5810823  | 4.80267    | 2.4279919 |
| 5.9956584 | 5.799695  | 5.0341306  | 5.5810823  | 4.80267    | 2.4279919 |
| 5.307632  | 4.253227  | 3.232346   | 3.9140952  | 3.6656382  | 2.4279919 |
| 5.307632  | 4.253227  | 3.232346   | 3.9140952  | 3.6656382  | 2.4279919 |
| 5.307632  | 4.253227  | 3.232346   | 3.9140952  | 3.6656382  | 2.4279919 |
| 5.307632  | 4.253227  | 3.232346   | 3.9140952  | 3.6656382  | 2.4279919 |
| 5.307632  | 4.253227  | 3.232346   | 3.9140952  | 3.6656382  | 2.4279919 |
| 5.307632  | 4.253227  | 3.232346   | 3.9140952  | 3.6656382  | 2.4279919 |
| 4.6699743 | 5.7703047 | 5.896803   | 5.7934823  | 4.484425   | 4.36691   |
| 10.742585 | 11.312136 | 10.118137  | 10.6726    | 4.9066978  | 5.312208  |
| 8.176049  | 7.161021  | 8.11556    | 7.8128533  | 6.701433   | 5.6299725 |
| 11.116395 | 10.999118 | 10.850793  | 11.020242  | 9.472317   | 8.833116  |
| 6.1588383 | 5.4160337 | 4.326622   | 4.6212587  | 3.699278   | 2.4279919 |
| 4.7626176 | 5.5361476 | 5.385187   | 5.143562   | 4.093274   | 3.6832945 |
| 4.7626176 | 5.5361476 | 5.385187   | 5.143562   | 4.093274   | 3.6832945 |
| 4.7626176 | 5.5361476 | 5.385187   | 5.143562   | 4.093274   | 3.6832945 |
| 10.19199  | 9.272262  | 12.108326  | 11.396457  | 10.248859  | 9.008374  |
| 10.19199  | 9.272262  | 12.108326  | 11.396457  | 10.248859  | 9.008374  |
| 8.121112  | 6.0508866 | 5.482541   | 5.407181   | 4.6673965  | 5.3373027 |
| 12.022866 | 13.212936 | 11.877131  | 12.551671  | 10.240652  | 10.661263 |
| 10.771082 | 12.443952 | 9.877325   | 11.551827  | 9.355125   | 7.8232293 |
| 8.3500595 | 10.111395 | 8.63079    | 9.477616   | 7.398412   | 6.3345537 |
| 5.896246  | 4.8711433 | 6.480447   | 6.106975   | 3.1414146  | 3.7069004 |
| 5.896246  | 4.8711433 | 6.480447   | 6.106975   | 3.1414146  | 3.7069004 |
| 5.896246  | 4.8711433 | 6.480447   | 6.106975   | 3.1414146  | 3.7069004 |
| 8.629734  | 4.7966757 | 6.5785966  | 6.1180987  | 2.3467326  | 3.1226819 |
| 9.595597  | 9.476601  | 7.4853125  | 8.713057   | 7.9416356  | 7.640181  |
| 9.595597  | 9.476601  | 7.4853125  | 8.713057   | 7.9416356  | 7.640181  |
| 9.595597  | 9.476601  | 7.4853125  | 8.713057   | 7.9416356  | 7.640181  |
| 4.765168  | 6.1372123 | 4.8083024  | 5.565819   | 4.2866316  | 3.1826048 |
| 5.1403947 | 6.371144  | 5.768847   | 6.1184826  | 4.397764   | 5.578876  |
| 5.1403947 | 6.371144  | 5.768847   | 6.1184826  | 4.397764   | 5.578876  |
| 7.530159  | 7.2172213 | 7.114332   | 7.323999   | 5.971114   | 5.610603  |
| 7.530159  | 7.2172213 | 7.114332   | 7.323999   | 5.971114   | 5.610603  |
| 7.530159  | 7.2172213 | 7.114332   | 7.323999   | 5.971114   | 5.610603  |
| 7.530159  | 7.2172213 | 7.114332   | 7.323999   | 5.971114   | 5.610603  |
| 4.097916  | 5.62074   | 4.6486554  | 4.918872   | 2.3467326  | 2.4279919 |
| 4.097916  | 5.62074   | 4.6486554  | 4.918872   | 2.3467326  | 2.4279919 |

|            |            |           |           |
|------------|------------|-----------|-----------|
| 4.1675897  | 4.0945215  | 3.9621627 | 3.8853211 |
| 8.525056   | 6.892417   | 7.4298134 | 7.174183  |
| 14.026723  | 8.328192   | 9.568935  | 8.587746  |
| 3.7080941  | 2.3408759  | 2.3618152 | 2.352752  |
| 2.350709   | 4.419416   | 2.9345014 | 4.4635553 |
| 9.676732   | 10.1362505 | 10.320815 | 10.179638 |
| 13.523036  | 7.393526   | 9.269134  | 7.995866  |
| 9.807134   | 10.182105  | 10.067049 | 10.11471  |
| 8.155564   | 8.298145   | 8.577614  | 8.373737  |
| 8.155564   | 8.298145   | 8.577614  | 8.373737  |
| 8.155564   | 8.298145   | 8.577614  | 8.373737  |
| 8.155564   | 8.298145   | 8.577614  | 8.373737  |
| 8.155564   | 8.298145   | 8.577614  | 8.373737  |
| 8.155564   | 8.298145   | 8.577614  | 8.373737  |
| 8.155564   | 8.298145   | 8.577614  | 8.373737  |
| 8.155564   | 8.298145   | 8.577614  | 8.373737  |
| 8.155564   | 8.298145   | 8.577614  | 8.373737  |
| 8.155564   | 8.298145   | 8.577614  | 8.373737  |
| 8.155564   | 8.298145   | 8.577614  | 8.373737  |
| 8.796121   | 7.068897   | 7.996295  | 7.415657  |
| 5.0098743  | 7.17352    | 7.301441  | 7.0096207 |
| 4.719424   | 3.0451915  | 3.8839915 | 2.8188586 |
| 5.881412   | 3.8041415  | 4.700565  | 4.379718  |
| 8.375731   | 8.307229   | 9.411084  | 8.911987  |
| 8.375731   | 8.307229   | 9.411084  | 8.911987  |
| 8.375731   | 8.307229   | 9.411084  | 8.911987  |
| 5.8925796  | 4.280236   | 4.646239  | 4.3367057 |
| 5.8925796  | 4.280236   | 4.646239  | 4.3367057 |
| 3.5240734  | 2.998682   | 2.3618152 | 3.5884035 |
| 3.5240734  | 2.998682   | 2.3618152 | 3.5884035 |
| 3.5240734  | 2.998682   | 2.3618152 | 3.5884035 |
| 3.5240734  | 2.998682   | 2.3618152 | 3.5884035 |
| 3.5240734  | 2.998682   | 2.3618152 | 3.5884035 |
| 4.081836   | 3.218621   | 4.532228  | 3.2848558 |
| 4.917691   | 7.196063   | 5.1921396 | 6.422993  |
| 7.2542863  | 6.02673    | 7.2850866 | 6.7711973 |
| 9.888025   | 9.239677   | 9.805144  | 9.437645  |
| 4.1352634  | 2.7256498  | 2.8579519 | 3.0656493 |
| 4.364566   | 4.460566   | 3.9857454 | 4.650916  |
| 4.364566   | 4.460566   | 3.9857454 | 4.650916  |
| 4.364566   | 4.460566   | 3.9857454 | 4.650916  |
| 11.0612545 | 7.9381137  | 9.137076  | 8.048873  |
| 11.0612545 | 7.9381137  | 9.137076  | 8.048873  |
| 5.1400228  | 5.4146647  | 4.8404107 | 5.0418954 |
| 9.9888525  | 11.143431  | 11.040394 | 11.071013 |
| 9.963567   | 8.884542   | 9.184741  | 8.931026  |
| 8.209225   | 7.37786    | 7.633297  | 7.6408815 |
| 3.7714834  | 4.1033344  | 5.0995426 | 4.691737  |
| 3.7714834  | 4.1033344  | 5.0995426 | 4.691737  |
| 3.7714834  | 4.1033344  | 5.0995426 | 4.691737  |
| 2.350709   | 3.6973567  | 2.3618152 | 3.6042337 |
| 8.335113   | 7.7054634  | 7.380066  | 7.419286  |
| 8.335113   | 7.7054634  | 7.380066  | 7.419286  |
| 8.335113   | 7.7054634  | 7.380066  | 7.419286  |
| 4.9453607  | 3.8559897  | 4.094766  | 3.792684  |
| 3.2332416  | 4.8894477  | 3.6160347 | 4.3941407 |
| 3.2332416  | 4.8894477  | 3.6160347 | 4.3941407 |
| 6.392637   | 5.272189   | 6.0912414 | 5.437332  |
| 6.392637   | 5.272189   | 6.0912414 | 5.437332  |
| 6.392637   | 5.272189   | 6.0912414 | 5.437332  |
| 6.392637   | 5.272189   | 6.0912414 | 5.437332  |
| 2.809821   | 4.4631004  | 3.2034223 | 2.8329086 |
| 2.809821   | 4.4631004  | 3.2034223 | 2.8329086 |

|               |             |             |            |    |           |
|---------------|-------------|-------------|------------|----|-----------|
| ASHGA5P040852 | 0.000437307 | 0.014669266 | 3.3576113  | up | noncoding |
| ASHGA5P040852 | 0.000437307 | 0.014669266 | 3.3576113  | up | noncoding |
| ASHGA5P056671 | 0.001221249 | 0.023487681 | 2.6023138  | up | noncoding |
| ASHGA5P045578 | 0.027724654 | 0.104047281 | 2.5366342  | up | noncoding |
| ASHGA5P043096 | 0.004555005 | 0.042992804 | 2.0481031  | up | noncoding |
| ASHGA5P026856 | 0.017092634 | 0.079591954 | 2.0057179  | up | noncoding |
| ASHGA5P050614 | 0.010112809 | 0.062335956 | 3.9771806  | up | noncoding |
| ASHGA5P058887 | 0.017827709 | 0.081055899 | 3.9794573  | up | noncoding |
| ASHGA5P018381 | 0.018618725 | 0.082980206 | 2.2535105  | up | noncoding |
| ASHGA5P046099 | 0.001401793 | 0.025091657 | 2.4535336  | up | noncoding |
| ASHGA5P035262 | 0.028298081 | 0.104997102 | 2.4160471  | up | noncoding |
| ASHGA5P054839 | 8.3884E-05  | 0.008738697 | 2.2739623  | up | noncoding |
| ASHGA5P018694 | 0.000169723 | 0.011182026 | 3.0175993  | up | noncoding |
| ASHGA5P000083 | 0.000483359 | 0.015384974 | 9.3371283  | up | noncoding |
| ASHGA5P054138 | 0.00123762  | 0.023574374 | 3.7838473  | up | noncoding |
| ASHGA5P034505 | 0.004791855 | 0.043918141 | 17.7722075 | up | noncoding |
| ASHGA5P030919 | 0.022918508 | 0.093781666 | 2.0969046  | up | noncoding |
| ASHGA5P044450 | 3.81857E-05 | 0.006301164 | 6.0784827  | up | noncoding |
| ASHGA5P026007 | 0.002204926 | 0.030923045 | 3.8948482  | up | noncoding |
| ASHGA5P016092 | 0.033380079 | 0.115144552 | 2.1888198  | up | noncoding |
| ASHGA5P033553 | 0.029416565 | 0.107329537 | 2.264317   | up | noncoding |
| ASHGA5P028160 | 0.000336542 | 0.013239107 | 2.4375562  | up | noncoding |
| ASHGA5P055790 | 0.006471107 | 0.051079512 | 2.6662233  | up | noncoding |
| ASHGA5P028953 | 0.013652392 | 0.071680418 | 2.0724724  | up | noncoding |
| ASHGA5P052758 | 0.005645773 | 0.047739466 | 3.0051376  | up | noncoding |
| ASHGA5P052472 | 0.044712612 | 0.135944249 | 2.5889303  | up | noncoding |
| ASHGA5P016013 | 0.000687451 | 0.017500829 | 2.0327487  | up | noncoding |
| ASHGA5P049029 | 0.032589587 | 0.113617438 | 4.1744088  | up | noncoding |
| ASHGA5P054711 | 0.008651336 | 0.057996114 | 2.7481611  | up | noncoding |
| ASHGA5P027698 | 0.001249834 | 0.023668906 | 4.6341222  | up | noncoding |
| ASHGA5P057962 | 0.000192136 | 0.01146874  | 3.0272469  | up | noncoding |
| ASHGA5P028638 | 0.001263752 | 0.023779671 | 2.3072418  | up | noncoding |
| ASHGA5P034136 | 0.017482488 | 0.080423645 | 2.162035   | up | noncoding |
| ASHGA5P047547 | 0.000424667 | 0.014669266 | 30.5139325 | up | noncoding |
| ASHGA5P037472 | 0.003511235 | 0.038218567 | 4.8391859  | up | noncoding |
| ASHGA5P037472 | 0.003511235 | 0.038218567 | 4.8391859  | up | noncoding |
| ASHGA5P037472 | 0.003511235 | 0.038218567 | 4.8391859  | up | noncoding |
| ASHGA5P037472 | 0.003511235 | 0.038218567 | 4.8391859  | up | noncoding |
| ASHGA5P037472 | 0.003511235 | 0.038218567 | 4.8391859  | up | noncoding |
| ASHGA5P037472 | 0.003511235 | 0.038218567 | 4.8391859  | up | noncoding |
| ASHGA5P043572 | 0.037005958 | 0.122123188 | 2.7176467  | up | noncoding |
| ASHGA5P043572 | 0.037005958 | 0.122123188 | 2.7176467  | up | noncoding |
| ASHGA5P049676 | 0.031117643 | 0.110685904 | 2.0011685  | up | noncoding |
| ASHGA5P034511 | 0.000253    | 0.012149764 | 2.1748536  | up | noncoding |
| ASHGA5P034511 | 0.000253    | 0.012149764 | 2.1748536  | up | noncoding |
| ASHGA5P048255 | 0.003467668 | 0.037964495 | 2.6679569  | up | noncoding |
| ASHGA5P040901 | 1.72001E-05 | 0.004580259 | 7.5035904  | up | noncoding |
| ASHGA5P040901 | 1.72001E-05 | 0.004580259 | 7.5035904  | up | noncoding |
| ASHGA5P031049 | 0.000978523 | 0.021189195 | 5.3717679  | up | noncoding |
| ASHGA5P038623 | 0.030147772 | 0.108872954 | 5.1480403  | up | noncoding |
| ASHGA5P056009 | 0.007258029 | 0.053618963 | 3.0977102  | up | noncoding |
| ASHGA5P056009 | 0.007258029 | 0.053618963 | 3.0977102  | up | noncoding |
| ASHGA5P045501 | 0.008738673 | 0.058198417 | 3.0596875  | up | noncoding |
| ASHGA5P017795 | 0.000966207 | 0.021093715 | 4.4865692  | up | noncoding |
| ASHGA5P048735 | 0.016546921 | 0.078495124 | 2.3783474  | up | noncoding |
| ASHGA5P050941 | 0.029989435 | 0.108456761 | 2.5130975  | up | noncoding |
| ASHGA5P048283 | 0.000116959 | 0.009923756 | 3.1676038  | up | noncoding |
| ASHGA5P048283 | 0.000116959 | 0.009923756 | 3.1676038  | up | noncoding |
| ASHGA5P046027 | 0.048419328 | 0.142802321 | 2.1644721  | up | noncoding |
| ASHGA5P045253 | 0.010734312 | 0.064157533 | 4.5164737  | up | noncoding |
| ASHGA5P043156 | 0.00171844  | 0.027747135 | 2.3188509  | up | noncoding |
| ASHGA5P038688 | 0.001689118 | 0.027504186 | 2.6081425  | up | noncoding |
| ASHGA5P049904 | 0.041052297 | 0.129441514 | 3.661103   | up | noncoding |

|                 |                |                     |      |       |   |
|-----------------|----------------|---------------------|------|-------|---|
| uc003lzi.3      | BC035392       | UCSC_knowngene      | 1269 | chr5  | - |
| uc003lzi.3      | BC035392       | UCSC_knowngene      | 1269 | chr5  | - |
| TCONS_00007073  | XLOC_002996    | LincRNAs identified | 211  | chr3  | + |
| TCONS_00015184  | XLOC_007240    | LincRNAs identified | 337  | chr8  | - |
| TCONS_00019744  | XLOC_009537    | LincRNAs identified | 423  | chr11 | - |
| TCONS_00011856  | XLOC_005347    | LincRNAs identified | 313  | chr6  | + |
| uc002tfs.4      | LOC151009      | UCSC_knowngene      | 3608 | chr2  | - |
| uc.403+         | uc.403         | UCR                 | 206  | chr16 | + |
| ENST00000452793 | RP3-395M20.8   | GENCODE             | 569  | chr1  | - |
| ENST00000451781 | RP11-706O15.5  | GENCODE             | 490  | chrX  | - |
| ENST00000449819 | AC093901.1     | GENCODE             | 458  | chr2  | - |
| uc001nhg.1      | LOC646813      | UCSC_knowngene      | 648  | chr11 | + |
| ENST00000456563 | RP11-706O15.3  | GENCODE             | 793  | chrX  | - |
| AW673701        |                | LincRNAs identified | 514  | chr11 | - |
| ENST00000424306 | RP11-308D16.4  | GENCODE             | 2222 | chrX  | + |
| uc002nbr.3      | UCA1           | UCSC_knowngene      | 1413 | chr19 | + |
| ENST00000570409 | RP11-461A8.4   | GENCODE             | 1068 | chr16 | - |
| ENST00000520268 | KB-1562D12.1   | GENCODE             | 491  | chr8  | - |
| NR_052852       | MARCKSL1       | RefSeq              | 1337 | chr1  | - |
| uc010fjx.1      | LINC00116      | UCSC_knowngene      | 1260 | chr2  | - |
| ENST00000582697 | RP11-958F21.1  | GENCODE             | 386  | chr18 | - |
| ENST00000449572 | RP11-426L16.8  | GENCODE             | 704  | chr1  | - |
| uc001veb.2      | DLEU2          | UCSC_knowngene      | 722  | chr13 | - |
| ENST00000422615 | DCUN1D2-AS1    | GENCODE             | 421  | chr13 | + |
| NR_024403       | LOC730101      | RefSeq              | 3784 | chr6  | + |
| ENST00000524034 | CTB-12O2.1     | GENCODE             | 399  | chr5  | + |
| ENST00000425797 | DTX2P1         | pseudogene          | 1652 | chr7  | + |
| ENST00000573315 | LINC00514      | GENCODE             | 491  | chr16 | + |
| TCONS_00006377  | XLOC_002996    | LincRNAs identified | 6659 | chr3  | + |
| ENST00000538806 | RP11-474D1.3   | GENCODE             | 4551 | chr12 | - |
| TCONS_00024435  | XLOC_011752    | LincRNAs identified | 618  | chr16 | + |
| ENST00000449881 | UGGT2-IT1      | GENCODE             | 463  | chr13 | - |
| NR_027301       | LOC148189      | RefSeq              | 2085 | chr19 | - |
| NR_038220       | LOC170425      | RefSeq              | 2685 | chr10 | + |
| ENST00000454980 | AP000695.4     | GENCODE             | 649  | chr21 | + |
| ENST00000454980 | AP000695.4     | GENCODE             | 649  | chr21 | + |
| ENST00000454980 | AP000695.4     | GENCODE             | 649  | chr21 | + |
| ENST00000454980 | AP000695.4     | GENCODE             | 649  | chr21 | + |
| ENST00000454980 | AP000695.4     | GENCODE             | 649  | chr21 | + |
| ENST00000504773 | RP11-510N19.5  | GENCODE             | 987  | chr1  | + |
| ENST00000504773 | RP11-510N19.5  | GENCODE             | 987  | chr1  | + |
| NR_033465       | NT5C3L         | RefSeq              | 1654 | chr17 | - |
| uc002ndl.1      | AK095546       | UCSC_knowngene      | 2675 | chr19 | + |
| uc002ndl.1      | AK095546       | UCSC_knowngene      | 2675 | chr19 | + |
| ENST00000531806 | FAM86C2P       | GENCODE             | 1814 | chr11 | - |
| ENST00000514846 | RP11-1334A24.4 | GENCODE             | 543  | chr5  | - |
| ENST00000514846 | RP11-1334A24.4 | GENCODE             | 543  | chr5  | - |
| ENST00000501520 | RP11-57A19.2   | GENCODE             | 2481 | chr16 | - |
| NR_033944       | LOC647323      | RefSeq              | 1625 | chr3  | - |
| NR_029435       | FLJ31306       | RefSeq              | 2457 | chr14 | - |
| NR_029435       | FLJ31306       | RefSeq              | 2457 | chr14 | - |
| ENST00000436510 | RP11-65J3.3    | GENCODE             | 1846 | chr9  | - |
| ENST00000445836 | TMEM191A       | GENCODE             | 671  | chr22 | + |
| uc001bql.3      | <b>SNHG12</b>  | UCSC_knowngene      | 1080 | chr1  | - |
| uc002wuz.3      | ZNF337         | UCSC_knowngene      | 4664 | chr20 | + |
| uc001opt.1      | AK125463       | UCSC_knowngene      | 2576 | chr11 | - |
| uc001opt.1      | AK125463       | UCSC_knowngene      | 2576 | chr11 | - |
| BC034527R       |                | LincRNAs identified | 1077 | chr1  | + |
| uc004aej.3      | BC065763       | UCSC_knowngene      | 1242 | chr9  | - |
| uc022agj.1      | PMS2P3         | UCSC_knowngene      | 1262 | chr7  | - |
| ENST00000438698 | AC034193.5     | pseudogene          | 534  | chr3  | + |
| TCONS_00002579  | XLOC_001192    | LincRNAs identified | 262  | chr1  | - |



|           |           |                     |                                         |                       |
|-----------|-----------|---------------------|-----------------------------------------|-----------------------|
| 162909609 | 162921064 |                     | GTTCTCCAGCTTAAGATCTTCTATCT              | natural antisense     |
| 162909609 | 162921064 |                     | GTTCTCCAGCTTAAGATCTTCTATCT              | natural antisense     |
| 195367105 | 195377054 |                     | TAAAATTATTACGGTGAACAGTCT                | intron sense-overlapp |
| 142208033 | 142209262 |                     | ACCACCAAAGTGAAGGTGAGTTTAC               | intergenic            |
| 103713661 | 103715301 | TCONS_00020124      | TTCTTCTGGTTTTTGTGTTTGTGGCT              | intergenic            |
| 74364303  | 74365877  |                     | TTTAGCGGAAAAACAGCAATGGA                 | intergenic            |
| 111132685 | 111142113 | NR_027244, uc010fj  | ATATTGAGCGAA(151009                     | intergenic            |
| 54323854  | 54324060  |                     | GTGAAGCGTAGACAAGAATTTAATC               | intergenic            |
| 2485679   | 2488470   |                     | GGAAGCCAGCGTGGGCTCTCCCGG                | natural antisense     |
| 3811332   | 3823750   | ENST00000432445,    | AGATGGTGCTATCTGAGAAAGCCAA               | intergenic            |
| 118940596 | 118943962 | ENST00000449075     | GAACATTAAATCCGACACTTGTACT               | intergenic            |
| 50368317  | 50379803  | ENST00000532521,    | TGTGTTTCAGGC(646813                     | intergenic            |
| 3772389   | 3785176   | ENST00000457936     | AGAGTCAGCACGCGGTGGCCTGGGT               | intergenic            |
| 2228859   | 2229381   |                     | TTACAACGGGGCAGGCTGACAACC                | intergenic            |
| 135991553 | 136075814 |                     | TTTTAGTACCACTAACATTTTTTGGT              | intergenic            |
| 15939756  | 15946230  | TCONS_00026909      | AACATTATTCCT(652995                     | intergenic            |
| 3700636   | 3701704   |                     | AACTCACAGAGCACCATCAGATCCT               | intronic antisense    |
| 102473404 | 102504727 |                     | AATTCAAAGCCTGGCACAGTTGGG                | natural antisense     |
| 32799429  | 32801840  |                     | CGGAGCGGAGGA(65108                      | exon sense-overlappi  |
| 110969791 | 110975365 | ENST00000426713     | TTACAGTCGGAC(205251                     | intergenic            |
| 22534170  | 22567629  |                     | TGTTTGGATTTGGGAATGTAAGGAC               | intergenic            |
| 113362911 | 113392401 | ENST00000401018,    | CGCAGACCAGACCCGCCCGCCTCT                | intergenic            |
| 50623324  | 50656139  | ENST00000449579     | TTTTACCAAGGT(8847                       | bidirectional         |
| 114110943 | 114116670 |                     | GGTACCACAAGAGGATGGAAAGA                 | natural antisense     |
| 52529198  | 52533951  |                     | GTGTTCCAGAT(730101                      | intergenic            |
| 151338458 | 151650006 | ENST00000518431,    | CCACTGGTCTTAAAGACAGACCTGC               | intergenic            |
| 76607933  | 76633625  |                     | AACGGCAATAGATGGAAGTCTGCAGTGTCCCTCCTGCA  |                       |
| 3051300   | 3052017   |                     | CTTCATTCTTTGT(283875                    | intergenic            |
| 195370820 | 195377621 |                     | TGTGGCTTCGTCATCATTATCCATGC              | intron sense-overlapp |
| 130517998 | 130529602 | ENST00000567788     | AAGGTGAAGTCAGAGGCTAAAAATC               | intergenic            |
| 64294312  | 64295136  |                     | TCAAATAAACCCATCTTGCATCAG                | intergenic            |
| 96567600  | 96568330  |                     | CATAGGGAGACAGACAATAAGTGA                | intron sense-overlapp |
| 28281400  | 28284848  |                     | CATGATGTTTTCT(148189                    | intergenic            |
| 86039735  | 86054415  |                     | TCTGACTCTGGAC(170425                    | intergenic            |
| 37818119  | 37833050  |                     | CCACTGACCAAACCTCCAAGTCACT               | natural antisense     |
| 37818119  | 37833050  |                     | CCACTGACCAAACCTCCAAGTCACT               | natural antisense     |
| 37818119  | 37833050  |                     | CCACTGACCAAACCTCCAAGTCACT               | natural antisense     |
| 37818119  | 37833050  |                     | CCACTGACCAAACCTCCAAGTCACT               | natural antisense     |
| 37818119  | 37833050  |                     | CCACTGACCAAACCTCCAAGTCACT               | natural antisense     |
| 201980497 | 201984785 |                     | TTTAATGATCAGACCCAGTCACAG                | exon sense-overlappi  |
| 201980497 | 201984785 |                     | TTTAATGATCAGACCCAGTCACAG                | exon sense-overlappi  |
| 39981333  | 39992523  |                     | TCAGTGGTTCTCT(115024                    | exon sense-overlappi  |
| 16210476  | 16213151  |                     | CTCCCAAATTTGGTGCTTGTTCCTTA              | exon sense-overlappi  |
| 16210476  | 16213151  |                     | CTCCCAAATTTGGTGCTTGTTCCTTA              | exon sense-overlappi  |
| 67559118  | 67572793  |                     | CTAGGAGACACA(645332                     | intergenic            |
| 176869803 | 176871581 |                     | GACATGTGGCAGCTTACGTTGGACA               | natural antisense     |
| 176869803 | 176871581 |                     | GACATGTGGCAGCTTACGTTGGACA               | natural antisense     |
| 28296205  | 28303385  |                     | GACATAAATGTGATAAATGTTGAC                | bidirectional         |
| 193675160 | 193721448 |                     | CAAGTTTCAGTG(647323                     | intergenic            |
| 58732082  | 58764855  |                     | TAAAGAAAAGCA(379025                     | intronic antisense    |
| 58732082  | 58764855  |                     | TAAAGAAAAGCA(379025                     | intronic antisense    |
| 132192930 | 132209569 |                     | GCCACAAAACATCATCAGTAGGTA                | intergenic            |
| 21057128  | 21058793  |                     | CGAGTGAGCGCC(84222                      | intergenic            |
| 28905049  | 28908366  | uc001bqn.3, uc001bc | TCAGACAGGTTT(85028                      | natural antisense     |
| 25604680  | 25658708  |                     | CGCTTCTCACGTAAGTGTCTCTTTAA              | natural antisense     |
| 70219515  | 70244568  |                     | GCATTCCAGGAATTCTGGGAGTCAT               | natural antisense     |
| 70219515  | 70244568  |                     | GCATTCCAGGAATTCTGGGAGTCAT               | natural antisense     |
| 211713915 | 211714910 |                     | TCCGAGAGCTGCTCTCCCATTTCCC               | intergenic            |
| 66688085  | 66699951  |                     | CTGAAGAAGAACAGAGCTCAAGAA                | intergenic            |
| 75140252  | 75157453  | ENST00000418756,    | AGGGGCCGGGAG(5387                       | intergenic            |
| 10029587  | 10036015  |                     | AGTCTCCTATACAAATAATGTGTTTATGTTTTTTGACAC |                       |
| 212605053 | 212606095 |                     | GATGCCCGGCTTGCTGGAGGATCAA               | intergenic            |

|                        |          |                          |           |           |
|------------------------|----------|--------------------------|-----------|-----------|
| NM_012484              | HMMR     | hyaluronan mediated +    | 162887516 | 162918953 |
| NM_012485              | HMMR     | hyaluronan mediated +    | 162887516 | 162918953 |
| ENST00000381954        | MUC20    | mucin 20, cell surfac +  | 195343315 | 195460421 |
|                        |          |                          |           |           |
| NM_003820              | TNFRSF14 | tumor necrosis factor +  | 2487804   | 2495267   |
|                        |          |                          |           |           |
| ENST00000407479        | DNASE1   | deoxyribonuclease I +    | 3692938   | 3708095   |
| NM_024915              | GRHL2    | grainyhead-like prote +  | 102504667 | 102681952 |
| NM_023009              | MARCKSL1 | MARCKS-related pr -      | 32799429  | 32801840  |
|                        |          |                          |           |           |
| ENST00000378180        | DLEU1    | deleted in lymphocyt +   | 50656306  | 50679433  |
| NM_001014283           | DCUN1D2  | DCN1-like protein 2 -    | 114110133 | 114145023 |
|                        |          |                          |           |           |
| AAACCATCTATGAGAGAAGACG |          |                          |           |           |
| ENST00000381954        | MUC20    | mucin 20, cell surfac +  | 195343315 | 195460421 |
|                        |          |                          |           |           |
| NM_020121              | UGGT2    | UDP-glucose:glycop -     | 96453835  | 96705736  |
|                        |          |                          |           |           |
| NM_001146077           | CLDN14   | claudin-14 -             | 37832919  | 37948867  |
| NM_001146078           | CLDN14   | claudin-14 -             | 37832919  | 37915117  |
| NM_001146079           | CLDN14   | claudin-14 -             | 37832919  | 37852388  |
| NM_012130              | CLDN14   | claudin-14 -             | 37832919  | 37838739  |
| NM_144492              | CLDN14   | claudin-14 -             | 37832919  | 37852388  |
| NM_001114309           | ELF3     | ETS-related transcrip +  | 201979689 | 201986315 |
| NM_004433              | ELF3     | ETS-related transcrip +  | 201979689 | 201986315 |
| NM_052935              | NT5C3L   | cytosolic 5'-nucleotid - | 39981333  | 39992523  |
| NM_001145160           | TPM4     | tropomyosin alpha-4 +    | 16178316  | 16213813  |
| NM_003290              | TPM4     | tropomyosin alpha-4 +    | 16187134  | 16213813  |
|                        |          |                          |           |           |
| NM_001004106           | GRK6     | G protein-coupled re +   | 176853686 | 176869850 |
| NM_002082              | GRK6     | G protein-coupled re +   | 176853686 | 176869850 |
| NM_001024401           | SBK1     | serine/threonine-prot +  | 28303839  | 28335170  |
|                        |          |                          |           |           |
| NM_002788              | PSMA3    | proteasome subunit a +   | 58711522  | 58738727  |
| NM_152132              | PSMA3    | proteasome subunit a +   | 58711522  | 58738727  |
|                        |          |                          |           |           |
| NM_017846              | TRNAU1AP | tRNA selenocysteine +    | 28879528  | 28905057  |
| NM_015655              | ZNF337   | zinc finger protein 3 -  | 25654850  | 25677469  |
| NM_003626              | PPFIA1   | liprin-alpha-1 isoforr + | 70116805  | 70230607  |
| NM_177423              | PPFIA1   | liprin-alpha-1 isoforr + | 70116805  | 70224598  |

ATACTGCCAGCAGGTATGTTG

|             |             |           |           |            |           |
|-------------|-------------|-----------|-----------|------------|-----------|
| 35.743354   | 8.217428    | 4.761431  | 3.013996  | 28.848679  | 30.931328 |
| 35.743354   | 8.217428    | 4.761431  | 3.013996  | 28.848679  | 30.931328 |
| 89.333248   | 23.571685   | 6.09764   | 4.717845  | 79.254486  | 62.160133 |
| 1644.71054  | 443.894467  | 10.180597 | 8.837682  | 1799.4796  | 2131.417  |
| 16.575387   | 5.690177    | 3.703537  | 2.669249  | 27.071032  | 15.587858 |
| 22.524351   | 8.517995    | 4.168552  | 3.164433  | 26.288408  | 26.254074 |
| 44.5375     | 7.765787    | 4.957296  | 2.96555   | 63.811043  | 83.88483  |
| 84.286278   | 12.144058   | 5.769577  | 3.777005  | 40.43009   | 52.89717  |
| 402.177147  | 117.749594  | 8.211492  | 7.039318  | 479.1638   | 496.6275  |
| 292.103047  | 72.940665   | 7.752999  | 6.458138  | 302.593    | 388.77658 |
| 72.743854   | 19.381447   | 5.604343  | 4.331694  | 49.289764  | 73.08426  |
| 890.372632  | 231.224205  | 9.351324  | 8.166116  | 1001.13684 | 1198.0511 |
| 724.678337  | 140.897117  | 9.045275  | 7.451874  | 734.732    | 859.53107 |
| 210.394465  | 12.663372   | 7.091837  | 3.868858  | 171.92708  | 202.08257 |
| 340.269048  | 55.383155   | 7.74581   | 5.825956  | 335.6176   | 127.40499 |
| 8503.295788 | 127.278092  | 10.876458 | 6.724907  | 2056.0425  | 143.12509 |
| 36.972593   | 13.099757   | 4.869868  | 3.801606  | 38.336845  | 34.391212 |
| 68.606253   | 7.448274    | 5.589311  | 2.985599  | 38.605637  | 32.41418  |
| 252.517477  | 41.560853   | 7.569564  | 5.607997  | 307.28113  | 311.13727 |
| 50.018812   | 15.221065   | 5.199738  | 4.069585  | 57.471268  | 85.22201  |
| 104.114252  | 30.090408   | 6.212406  | 5.03333   | 88.29154   | 65.18645  |
| 3036.799417 | 801.78622   | 11.138062 | 9.852626  | 3225.2925  | 3208.1794 |
| 74.286039   | 18.763335   | 5.818878  | 4.40408   | 85.41546   | 87.7056   |
| 38.193177   | 15.071641   | 4.898896  | 3.847543  | 38.92149   | 20.45905  |
| 54.535814   | 10.735258   | 5.145301  | 3.55787   | 119.90071  | 83.328125 |
| 111.325748  | 17.252755   | 5.757733  | 4.385376  | 40.94472   | 64.71338  |
| 366.183722  | 116.028485  | 8.122691  | 7.099259  | 379.43777  | 372.69214 |
| 1233.225955 | 104.872228  | 8.598573  | 6.537001  | 2352.4934  | 4120.9424 |
| 171.706517  | 47.625787   | 7.067689  | 5.609223  | 176.7731   | 153.90637 |
| 116.469383  | 9.579358    | 5.432949  | 3.220653  | 198.75078  | 394.23196 |
| 339.502457  | 68.186235   | 8.010211  | 6.412205  | 295.61853  | 236.96039 |
| 230.413064  | 58.967725   | 7.359937  | 6.153768  | 194.59143  | 150.87617 |
| 56.490585   | 17.948676   | 5.43081   | 4.31842   | 55.31866   | 43.085728 |
| 612.607975  | 15.382745   | 8.789092  | 3.857696  | 713.3598   | 531.1806  |
| 76.021759   | 9.473908    | 5.690136  | 3.415371  | 55.72007   | 28.205908 |
| 76.021759   | 9.473908    | 5.690136  | 3.415371  | 55.72007   | 28.205908 |
| 76.021759   | 9.473908    | 5.690136  | 3.415371  | 55.72007   | 28.205908 |
| 76.021759   | 9.473908    | 5.690136  | 3.415371  | 55.72007   | 28.205908 |
| 76.021759   | 9.473908    | 5.690136  | 3.415371  | 55.72007   | 28.205908 |
| 122.479975  | 30.494795   | 6.357588  | 4.91523   | 100.90679  | 61.512558 |
| 122.479975  | 30.494795   | 6.357588  | 4.91523   | 100.90679  | 61.512558 |
| 86.529162   | 25.708518   | 5.985448  | 4.984606  | 68.6536    | 32.70743  |
| 127.6219    | 35.602934   | 6.54532   | 5.424402  | 143.69469  | 204.22728 |
| 127.6219    | 35.602934   | 6.54532   | 5.424402  | 143.69469  | 204.22728 |
| 667.34513   | 151.310647  | 8.963216  | 7.547481  | 844.57745  | 813.09937 |
| 1176.035712 | 78.448371   | 9.374669  | 6.467087  | 921.7869   | 1458.1765 |
| 1176.035712 | 78.448371   | 9.374669  | 6.467087  | 921.7869   | 1458.1765 |
| 552.783603  | 53.803954   | 8.49138   | 6.065983  | 678.0652   | 1062.6821 |
| 74.126109   | 6.086488    | 4.967065  | 2.603042  | 136.91422  | 10.44712  |
| 1083.642423 | 231.97131   | 9.64036   | 8.009158  | 901.8561   | 979.4404  |
| 1083.642423 | 231.97131   | 9.64036   | 8.009158  | 901.8561   | 979.4404  |
| 128.366218  | 38.610105   | 6.561264  | 4.94788   | 192.15558  | 134.51709 |
| 202.191623  | 30.122075   | 7.275726  | 5.110113  | 246.0883   | 254.50757 |
| 574.907075  | 164.44393   | 8.743764  | 7.493805  | 619.4312   | 385.91397 |
| 51.73774    | 14.491109   | 5.274452  | 3.944986  | 39.98769   | 42.810726 |
| 214.94364   | 40.476353   | 7.309282  | 5.64589   | 253.22597  | 357.76944 |
| 214.94364   | 40.476353   | 7.309282  | 5.64589   | 253.22597  | 357.76944 |
| 1080.94565  | 330.216707  | 9.572644  | 8.458629  | 1054.4691  | 997.0217  |
| 1727.092292 | 175.449777  | 9.958234  | 7.783037  | 2020.9138  | 3116.4175 |
| 5512.67895  | 1486.409325 | 11.955734 | 10.742324 | 6564.956   | 7562.579  |
| 61.516322   | 15.343968   | 5.554322  | 4.171299  | 69.69849   | 80.015335 |
| 213.181127  | 62.887276   | 7.10782   | 5.235542  | 245.99568  | 253.16605 |

|            |            |           |           |            |           |
|------------|------------|-----------|-----------|------------|-----------|
| 21.349968  | 63.77368   | 27.395817 | 42.160652 | 4.9999995  | 4.9999995 |
| 21.349968  | 63.77368   | 27.395817 | 42.160652 | 4.9999995  | 4.9999995 |
| 97.75098   | 126.14557  | 61.56931  | 109.11901 | 25.193968  | 9.814333  |
| 1187.5463  | 717.63684  | 2114.0188 | 1918.1647 | 447.87534  | 154.23895 |
| 15.33202   | 15.349431  | 12.93442  | 13.177559 | 4.9999995  | 5.402302  |
| 23.374538  | 19.576914  | 19.00107  | 20.651102 | 9.316266   | 4.9999995 |
| 22.676037  | 22.978474  | 35.370087 | 38.50453  | 9.018608   | 4.9999995 |
| 22.55525   | 130.94618  | 113.33327 | 145.55571 | 8.299268   | 11.271199 |
| 276.6647   | 226.87265  | 488.36923 | 445.365   | 99.04918   | 54.141685 |
| 189.36174  | 169.8839   | 365.77036 | 336.2327  | 53.17378   | 78.4128   |
| 16.56826   | 74.30254   | 104.72871 | 118.48959 | 12.45331   | 19.677275 |
| 723.01025  | 478.3789   | 957.8532  | 983.8055  | 266.65582  | 192.60036 |
| 555.73517  | 371.7967   | 947.63293 | 878.64215 | 116.76311  | 103.1199  |
| 102.90752  | 474.43735  | 65.0383   | 245.97397 | 12.267082  | 16.83908  |
| 543.61053  | 575.617    | 85.33707  | 374.0271  | 45.461735  | 10.850509 |
| 4240.729   | 386.44214  | 24688.797 | 19504.639 | 40.858986  | 33.167015 |
| 43.14393   | 28.44066   | 37.408657 | 40.114254 | 12.85729   | 4.9999995 |
| 48.180386  | 135.24219  | 55.814735 | 101.38039 | 4.9999995  | 4.9999995 |
| 315.10446  | 152.30045  | 205.42587 | 223.85568 | 33.731365  | 19.939058 |
| 23.15095   | 41.353237  | 46.29913  | 46.616276 | 21.839361  | 12.68461  |
| 71.02745   | 228.63449  | 64.36708  | 107.1785  | 29.182713  | 14.994508 |
| 3850.4094  | 2423.658   | 2560.599  | 2952.6582 | 1076.2179  | 463.2567  |
| 66.36852   | 42.982265  | 67.89449  | 95.3499   | 16.38625   | 12.39504  |
| 48.888992  | 46.200993  | 38.133812 | 36.554726 | 21.74287   | 4.9999995 |
| 35.742836  | 20.599539  | 37.24178  | 30.401894 | 13.714491  | 6.461871  |
| 11.0045805 | 295.19147  | 58.485905 | 197.61443 | 16.43115   | 14.4272   |
| 336.5605   | 247.2013   | 424.33032 | 436.8803  | 106.467316 | 54.112778 |
| 342.68726  | 85.93062   | 252.71477 | 244.58728 | 159.80539  | 257.72598 |
| 184.0559   | 193.88408  | 138.1988  | 183.42085 | 49.899536  | 17.75549  |
| 21.710176  | 15.201671  | 36.61296  | 32.30875  | 12.39952   | 23.426628 |
| 309.51688  | 442.29     | 327.96976 | 424.65918 | 61.04462   | 52.895264 |
| 218.87082  | 109.427414 | 371.39212 | 337.32043 | 60.73437   | 47.482346 |
| 49.296852  | 39.22972   | 69.68234  | 82.33021  | 17.30963   | 7.067106  |
| 806.5918   | 254.28299  | 714.69366 | 655.539   | 24.617731  | 32.629646 |
| 62.956486  | 42.82045   | 136.32782 | 130.09982 | 4.9999995  | 7.744493  |
| 62.956486  | 42.82045   | 136.32782 | 130.09982 | 4.9999995  | 7.744493  |
| 62.956486  | 42.82045   | 136.32782 | 130.09982 | 4.9999995  | 7.744493  |
| 62.956486  | 42.82045   | 136.32782 | 130.09982 | 4.9999995  | 7.744493  |
| 62.956486  | 42.82045   | 136.32782 | 130.09982 | 4.9999995  | 7.744493  |
| 111.43712  | 269.06726  | 41.59275  | 150.36337 | 14.767531  | 5.4955564 |
| 111.43712  | 269.06726  | 41.59275  | 150.36337 | 14.767531  | 5.4955564 |
| 97.31874   | 131.95213  | 73.92448  | 114.61859 | 24.171225  | 22.271128 |
| 63.713238  | 146.50258  | 78.98239  | 128.61122 | 36.10927   | 41.604836 |
| 63.713238  | 146.50258  | 78.98239  | 128.61122 | 36.10927   | 41.604836 |
| 740.1899   | 438.29596  | 581.9954  | 585.9127  | 107.43762  | 110.137   |
| 174.86769  | 2432.772   | 481.81848 | 1586.7927 | 58.17524   | 69.56645  |
| 174.86769  | 2432.772   | 481.81848 | 1586.7927 | 58.17524   | 69.56645  |
| 290.2151   | 645.7134   | 159.76642 | 480.2594  | 56.811165  | 54.38839  |
| 230.09245  | 15.527152  | 21.199497 | 30.576218 | 4.9999995  | 4.9999995 |
| 704.33704  | 1396.0251  | 948.2408  | 1571.9551 | 268.27924  | 90.21822  |
| 704.33704  | 1396.0251  | 948.2408  | 1571.9551 | 268.27924  | 90.21822  |
| 147.722    | 61.344448  | 140.41689 | 94.0413   | 52.99515   | 12.40872  |
| 213.08072  | 180.88579  | 134.56601 | 184.02135 | 24.94623   | 12.45655  |
| 734.6096   | 666.35535  | 386.53513 | 656.5972  | 116.4925   | 55.919193 |
| 28.404747  | 79.85288   | 42.033714 | 77.33668  | 9.362847   | 6.605767  |
| 154.71037  | 139.22707  | 174.94151 | 209.78748 | 42.835114  | 32.84622  |
| 154.71037  | 139.22707  | 174.94151 | 209.78748 | 42.835114  | 32.84622  |
| 717.3736   | 540.3303   | 1774.5244 | 1401.9548 | 319.77353  | 131.0913  |
| 845.1896   | 229.50085  | 2327.5186 | 1823.0134 | 164.42448  | 198.95477 |
| 4867.5547  | 3208.631   | 5601.558  | 5270.795  | 1995.8896  | 926.8179  |
| 41.780792  | 44.23447   | 65.818535 | 67.55031  | 14.75055   | 9.308372  |
| 158.21764  | 39.70247   | 297.41318 | 284.59174 | 99.604385  | 24.104704 |

|           |           |            |            |           |           |
|-----------|-----------|------------|------------|-----------|-----------|
| 6.108042  | 19.773014 | 7.482897   | 5.9406147  | 4.3974247 | 4.88498   |
| 6.108042  | 19.773014 | 7.482897   | 5.9406147  | 4.3974247 | 4.88498   |
| 44.664013 | 20.8659   | 21.716894  | 19.175     | 5.8557734 | 5.7929482 |
| 1193.6039 | 290.841   | 351.28687  | 225.52074  | 10.329566 | 10.644848 |
| 7.712011  | 6.0267496 | 4.9999995  | 4.9999995  | 4.304737  | 3.9817667 |
| 12.9897   | 4.9999995 | 10.20149   | 8.600516   | 4.2599893 | 4.66343   |
| 15.519981 | 6.607282  | 5.4488506  | 4.9999995  | 5.5380483 | 6.195458  |
| 20.820597 | 16.713737 | 6.2615814  | 9.497968   | 4.874274  | 5.5854106 |
| 266.93237 | 95.86615  | 104.89329  | 85.61489   | 8.426655  | 8.644871  |
| 39.066635 | 69.0768   | 113.993484 | 83.92049   | 7.79063   | 8.309243  |
| 7.150571  | 47.321815 | 9.099247   | 20.586464  | 5.162209  | 6.0075507 |
| 335.0273  | 152.85    | 263.87793  | 176.33382  | 9.499339  | 9.868406  |
| 130.33287 | 125.81471 | 221.80368  | 147.54843  | 9.05374   | 9.408349  |
| 4.9999995 | 14.67985  | 13.03613   | 14.15809   | 6.973092  | 7.4085836 |
| 112.08621 | 72.58059  | 42.408134  | 48.91175   | 7.9376025 | 6.7640977 |
| 53.175644 | 65.32799  | 398.45743  | 172.68149  | 10.52566  | 6.9299755 |
| 13.51466  | 14.550781 | 17.658741  | 15.01707   | 4.7947555 | 5.02265   |
| 5.036817  | 9.986807  | 10.96512   | 8.700901   | 4.8057127 | 4.9445496 |
| 36.77008  | 39.697624 | 69.51012   | 49.71687   | 7.8095045 | 8.006871  |
| 25.34028  | 5.833809  | 13.465489  | 12.16284   | 5.3826704 | 6.217394  |
| 67.296196 | 25.21676  | 24.810112  | 19.042162  | 6.011455  | 5.8543725 |
| 1696.9365 | 540.7616  | 551.99774  | 481.54688  | 11.177897 | 11.228771 |
| 35.366592 | 22.508287 | 15.172562  | 10.751279  | 5.9628596 | 6.2514596 |
| 31.012033 | 12.090981 | 10.153841  | 10.4301195 | 4.8180795 | 4.325995  |
| 18.250767 | 4.9999995 | 12.030701  | 8.953717   | 6.4550276 | 6.1855717 |
| 11.376429 | 25.46444  | 16.36605   | 19.45126   | 4.8932486 | 5.8440833 |
| 150.79462 | 86.46706  | 186.27174  | 112.057396 | 8.107108  | 8.249466  |
| 21.47085  | 111.6025  | 28.37472   | 50.25393   | 10.724892 | 11.586438 |
| 88.72244  | 24.101582 | 80.10692   | 25.168756  | 7.0121365 | 7.0299687 |
| 4.9999995 | 4.9999995 | 6.6499987  | 4.9999995  | 7.183602  | 8.327551  |
| 60.17635  | 69.70817  | 96.10765   | 69.185356  | 7.755659  | 7.6258564 |
| 78.25968  | 36.70279  | 80.59834   | 50.028824  | 7.155577  | 7.0015287 |
| 28.882566 | 25.823494 | 16.363249  | 12.246011  | 5.323874  | 5.316849  |
| 14.501229 | 10.34913  | 4.9999995  | 5.198735   | 9.009434  | 8.743496  |
| 10.338938 | 15.375312 | 11.1682    | 7.2165084  | 5.336431  | 4.761637  |
| 10.338938 | 15.375312 | 11.1682    | 7.2165084  | 5.336431  | 4.761637  |
| 10.338938 | 15.375312 | 11.1682    | 7.2165084  | 5.336431  | 4.761637  |
| 10.338938 | 15.375312 | 11.1682    | 7.2165084  | 5.336431  | 4.761637  |
| 10.338938 | 15.375312 | 11.1682    | 7.2165084  | 5.336431  | 4.761637  |
| 31.240969 | 36.545258 | 54.531273  | 40.38818   | 6.2065506 | 5.780081  |
| 31.240969 | 36.545258 | 54.531273  | 40.38818   | 6.2065506 | 5.780081  |
| 16.821096 | 32.938984 | 27.287365  | 30.761312  | 5.6405935 | 4.954466  |
| 29.311617 | 53.86818  | 19.14773   | 33.575974  | 6.7152367 | 7.422526  |
| 29.311617 | 53.86818  | 19.14773   | 33.575974  | 6.7152367 | 7.422526  |
| 152.99402 | 128.99031 | 231.36476  | 176.94017  | 9.260468  | 9.340039  |
| 32.054016 | 164.45927 | 51.685104  | 94.750145  | 9.380393  | 10.135849 |
| 32.054016 | 164.45927 | 51.685104  | 94.750145  | 9.380393  | 10.135849 |
| 67.31034  | 46.69796  | 56.619213  | 40.996655  | 8.935019  | 9.711216  |
| 4.9999995 | 4.9999995 | 11.518931  | 4.9999995  | 6.6431293 | 3.4550548 |
| 480.2759  | 143.4264  | 263.21802  | 146.41008  | 9.345069  | 9.592757  |
| 480.2759  | 143.4264  | 263.21802  | 146.41008  | 9.345069  | 9.592757  |
| 121.14499 | 12.685861 | 16.1788    | 16.247107  | 7.135289  | 6.8391075 |
| 41.332455 | 25.928501 | 46.229435  | 29.839281  | 7.4875226 | 7.7255597 |
| 209.70927 | 95.270836 | 322.27097  | 187.00081  | 8.801858  | 8.299278  |
| 24.364336 | 7.2382727 | 22.266954  | 17.108479  | 4.8609715 | 5.308319  |
| 49.94914  | 31.464169 | 45.150177  | 40.613297  | 7.5271125 | 8.194462  |
| 49.94914  | 31.464169 | 45.150177  | 40.613297  | 7.5271125 | 8.194462  |
| 851.4444  | 245.14005 | 255.55846  | 178.2925   | 9.569232  | 9.616721  |
| 96.02811  | 200.26047 | 205.07706  | 187.95377  | 10.498606 | 11.190278 |
| 3060.5527 | 686.86395 | 1404.1372  | 844.1946   | 12.209661 | 12.426967 |
| 24.17912  | 13.331732 | 16.555067  | 13.938968  | 5.663678  | 6.1291175 |
| 214.59908 | 7.131518  | 19.094799  | 12.78917   | 7.486947  | 7.7181187 |

|           |            |           |            |           |           |
|-----------|------------|-----------|------------|-----------|-----------|
| 4.097916  | 5.62074    | 4.6486554 | 4.918872   | 2.3467326 | 2.4279919 |
| 4.097916  | 5.62074    | 4.6486554 | 4.918872   | 2.3467326 | 2.4279919 |
| 6.289446  | 6.646807   | 5.75281   | 6.248054   | 4.897938  | 4.0767684 |
| 9.844387  | 9.180233   | 10.761244 | 10.323305  | 9.068845  | 8.119947  |
| 3.6132596 | 3.3773136  | 3.6318192 | 3.3123264  | 2.3467326 | 3.168814  |
| 4.2373147 | 3.7661543  | 4.152366  | 3.932056   | 3.4335835 | 2.4279919 |
| 4.1914296 | 4.0302577  | 4.9917154 | 4.7968655  | 3.3867471 | 2.4279919 |
| 4.182831  | 6.70329    | 6.6100464 | 6.661609   | 3.2587466 | 4.2857423 |
| 7.776466  | 7.520152   | 8.67129   | 8.229517   | 6.8646913 | 6.607797  |
| 7.2429748 | 7.0795565  | 8.259016  | 7.8365755  | 5.969233  | 7.142981  |
| 3.7337983 | 5.855495   | 6.497099  | 6.3699036  | 3.8676736 | 5.127019  |
| 9.146963  | 8.587312   | 9.650996  | 9.354929   | 8.320385  | 8.449027  |
| 8.761304  | 8.217877   | 9.637581  | 9.192798   | 7.105855  | 7.5370455 |
| 6.36954   | 8.575204   | 5.8269167 | 7.3976846  | 3.8455462 | 4.8898206 |
| 8.731722  | 8.850399   | 6.210328  | 7.980708   | 5.7361293 | 4.2291527 |
| 11.699583 | 8.27385    | 14.204054 | 13.625623  | 5.587536  | 5.888458  |
| 5.1078234 | 4.368171   | 5.073363  | 4.8524427  | 3.9104486 | 2.4279919 |
| 5.2729254 | 6.7515287  | 5.617491  | 6.143657   | 2.3467326 | 2.4279919 |
| 7.965569  | 6.924188   | 7.4430404 | 7.268209   | 5.3053064 | 5.1464767 |
| 4.224234  | 4.9537234  | 5.3638916 | 5.056514   | 4.685957  | 4.4622335 |
| 5.8381834 | 7.5319133  | 5.8137054 | 6.224807   | 5.097228  | 4.719104  |
| 11.547944 | 10.906386  | 11.049557 | 10.917817  | 10.375759 | 9.725263  |
| 5.7448416 | 5.0133963  | 5.8850656 | 6.0556455  | 4.2650223 | 4.42722   |
| 5.2965736 | 5.1258764  | 5.099798  | 4.7270536  | 4.680293  | 2.4279919 |
| 4.843294  | 3.8473296  | 5.0666924 | 4.4738917  | 4.0050807 | 3.4465315 |
| 3.13718   | 7.890339   | 5.682056  | 7.0994887  | 4.2694855 | 4.660921  |
| 8.060904  | 7.6424513  | 8.471642  | 8.204572   | 6.971765  | 6.6061606 |
| 8.081514  | 6.0692787  | 7.740992  | 7.388323   | 7.5659614 | 8.86651   |
| 7.201823  | 7.280886   | 6.8894434 | 6.9918776  | 5.8755355 | 4.972652  |
| 4.1229396 | 3.3622644  | 5.0413094 | 4.5600276  | 3.8609853 | 5.379029  |
| 7.935874  | 8.479584   | 8.106307  | 8.157988   | 6.1655693 | 6.5743484 |
| 7.451929  | 6.4281397  | 8.280339  | 7.842108   | 6.1595507 | 6.416201  |
| 5.3075356 | 4.8710284  | 5.9211416 | 5.8444333  | 4.3512177 | 3.583119  |
| 9.303602  | 7.681485   | 9.218643  | 8.777891   | 4.8641167 | 5.867154  |
| 5.669308  | 5.0083966  | 6.8659334 | 6.499109   | 2.3467326 | 3.7152045 |
| 5.669308  | 5.0083966  | 6.8659334 | 6.499109   | 2.3467326 | 3.7152045 |
| 5.669308  | 5.0083966  | 6.8659334 | 6.499109   | 2.3467326 | 3.7152045 |
| 5.669308  | 5.0083966  | 6.8659334 | 6.499109   | 2.3467326 | 3.7152045 |
| 5.669308  | 5.0083966  | 6.8659334 | 6.499109   | 2.3467326 | 3.7152045 |
| 6.481742  | 7.7514086  | 5.220528  | 6.7052193  | 4.1154904 | 3.1954978 |
| 6.481742  | 7.7514086  | 5.220528  | 6.7052193  | 4.1154904 | 3.1954978 |
| 6.2826185 | 6.713787   | 6.002713  | 6.3185124  | 4.837557  | 5.3061304 |
| 5.6876426 | 6.8662877  | 6.0994687 | 6.48076    | 5.40983   | 6.224098  |
| 5.6876426 | 6.8662877  | 6.0994687 | 6.48076    | 5.40983   | 6.224098  |
| 9.18208   | 8.464981   | 8.923181  | 8.608549   | 6.983787  | 7.6308746 |
| 7.120654  | 10.912378  | 8.650681  | 10.048056  | 6.099095  | 6.9684153 |
| 7.120654  | 10.912378  | 8.650681  | 10.048056  | 6.099095  | 6.9684153 |
| 7.8492575 | 9.021839   | 7.0967593 | 8.334188   | 6.065835  | 6.615508  |
| 7.5240226 | 3.3972692  | 4.3011312 | 4.4817843  | 2.3467326 | 2.4279919 |
| 9.106663  | 10.124751  | 9.639024  | 10.0338955 | 8.327092  | 7.345213  |
| 9.106663  | 10.124751  | 9.639024  | 10.0338955 | 8.327092  | 7.345213  |
| 6.879807  | 5.5634136  | 6.913404  | 6.036565   | 5.9632554 | 4.429617  |
| 7.419056  | 7.176334   | 6.848785  | 6.997098   | 4.883735  | 4.435931  |
| 9.168936  | 9.071902   | 8.34033   | 8.78028    | 7.1029854 | 6.657811  |
| 4.5200667 | 5.9611406  | 5.2330494 | 5.7631674  | 3.4402542 | 3.4813995 |
| 6.9389825 | 6.795329   | 7.2237377 | 7.176069   | 5.6542716 | 5.8755355 |
| 6.9389825 | 6.795329   | 7.2237377 | 7.176069   | 5.6542716 | 5.8755355 |
| 9.132697  | 8.755491   | 10.495647 | 9.866077   | 8.591352  | 7.8851233 |
| 9.372145  | 7.537774   | 10.907656 | 10.242946  | 7.609612  | 8.495712  |
| 11.898183 | 11.3147135 | 12.142589 | 11.74229   | 11.277311 | 10.734393 |
| 5.0649405 | 5.056514   | 5.843215  | 5.5684667  | 4.1140037 | 3.9939806 |
| 6.971159  | 4.8891463  | 7.972278  | 7.609274   | 6.8731723 | 5.4233265 |

|           |           |           |           |
|-----------|-----------|-----------|-----------|
| 2.809821  | 4.4631004 | 3.2034223 | 2.8329086 |
| 2.809821  | 4.4631004 | 3.2034223 | 2.8329086 |
| 5.4780974 | 4.549365  | 4.712892  | 4.592008  |
| 10.16732  | 8.6294    | 8.690093  | 8.350485  |
| 3.0874476 | 2.697931  | 2.3618152 | 2.352752  |
| 3.7762213 | 2.3408759 | 3.6295815 | 3.3783438 |
| 4.020419  | 2.823179  | 2.782209  | 2.352752  |
| 4.419416  | 4.2057467 | 2.959929  | 3.5324502 |
| 8.005969  | 6.91579   | 6.969453  | 6.8722057 |
| 5.288601  | 6.419374  | 7.087643  | 6.8409977 |
| 2.9955173 | 5.8244696 | 3.4711406 | 4.704344  |
| 8.332223  | 7.6304564 | 8.297893  | 7.9667106 |
| 6.982648  | 7.34035   | 8.047441  | 7.697902  |
| 2.350709  | 4.0111647 | 3.9788797 | 4.1370273 |
| 6.769919  | 6.501544  | 5.679334  | 6.039655  |
| 5.7238626 | 6.332508  | 8.881201  | 7.935874  |
| 3.8309355 | 3.9980068 | 4.416343  | 4.2259126 |
| 2.5910902 | 3.4215405 | 3.7299023 | 3.3963394 |
| 5.202394  | 5.5477166 | 6.38396   | 6.0621257 |
| 4.685957  | 2.6548626 | 4.0228925 | 3.9056056 |
| 6.0530887 | 4.8463974 | 4.9033103 | 4.5808525 |
| 10.668611 | 9.536282  | 9.341576  | 9.468268  |
| 5.150168  | 4.665109  | 4.1976686 | 3.7192945 |
| 4.969976  | 3.7099097 | 3.6227787 | 3.6743095 |
| 4.244957  | 2.3408759 | 3.8657537 | 3.444022  |
| 3.603506  | 4.859937  | 4.304893  | 4.6135163 |
| 7.185799  | 6.765874  | 7.7901154 | 7.275838  |
| 4.4593306 | 7.149307  | 5.1025853 | 6.078312  |
| 6.440709  | 4.772693  | 6.5832157 | 5.0105305 |
| 2.350709  | 2.3408759 | 3.0395663 | 2.352752  |
| 5.8973746 | 6.4347696 | 6.8429418 | 6.5582266 |
| 6.255379  | 5.4292765 | 6.5900054 | 6.0721936 |
| 4.873985  | 4.881957  | 4.3045616 | 3.9156823 |
| 3.9242282 | 3.4754248 | 2.3618152 | 2.6534348 |
| 3.4754248 | 4.083042  | 3.7578416 | 3.1139834 |
| 3.4754248 | 4.083042  | 3.7578416 | 3.1139834 |
| 3.4754248 | 4.083042  | 3.7578416 | 3.1139834 |
| 3.4754248 | 4.083042  | 3.7578416 | 3.1139834 |
| 3.4754248 | 4.083042  | 3.7578416 | 3.1139834 |
| 4.979194  | 5.422139  | 6.033459  | 5.7456017 |
| 4.979194  | 5.422139  | 6.033459  | 5.7456017 |
| 4.1310453 | 5.25502   | 5.0422177 | 5.335664  |
| 4.8934426 | 6.028906  | 4.524849  | 5.4652863 |
| 4.8934426 | 6.028906  | 4.524849  | 5.4652863 |
| 7.206245  | 7.3796406 | 8.110435  | 7.9739037 |
| 5.0158744 | 7.7346745 | 5.962536  | 7.0219293 |
| 5.0158744 | 7.7346745 | 5.962536  | 7.0219293 |
| 6.053357  | 5.802692  | 6.090138  | 5.768367  |
| 2.350709  | 2.3408759 | 3.79919   | 2.352752  |
| 8.863318  | 7.5375977 | 8.29456   | 7.6871657 |
| 8.863318  | 7.5375977 | 8.29456   | 7.6871657 |
| 6.8803277 | 3.782194  | 4.2886376 | 4.3432484 |
| 5.3666897 | 4.887112  | 5.7994223 | 5.2877893 |
| 7.6636105 | 6.9052825 | 8.572605  | 8.060533  |
| 4.631235  | 2.9482548 | 4.7484694 | 4.420302  |
| 5.638393  | 5.1869454 | 5.7657437 | 5.754452  |
| 5.638393  | 5.1869454 | 5.7657437 | 5.754452  |
| 9.675767  | 8.359835  | 8.2552805 | 7.984416  |
| 6.5472045 | 8.046786  | 7.9314446 | 8.067465  |
| 11.541893 | 9.893059  | 10.712136 | 10.295151 |
| 4.6203313 | 3.85964   | 4.3248324 | 4.1150074 |
| 7.6891384 | 2.9273627 | 4.519997  | 3.980256  |

|               |             |             |            |    |           |
|---------------|-------------|-------------|------------|----|-----------|
| ASHGA5P045311 | 0.013825445 | 0.07198363  | 2.5073394  | up | noncoding |
| ASHGA5P037726 | 0.036708206 | 0.121581005 | 2.156068   | up | noncoding |
| ASHGA5P055763 | 6.37423E-05 | 0.007893824 | 3.611404   | up | noncoding |
| ASHGA5P029632 | 0.000155496 | 0.011056858 | 2.7827625  | up | noncoding |
| ASHGA5P037994 | 0.013389521 | 0.070917754 | 2.4246319  | up | noncoding |
| ASHGA5P031393 | 0.021757707 | 0.091077182 | 4.4473114  | up | noncoding |
| ASHGA5P027059 | 0.032129545 | 0.112554199 | 3.1101796  | up | noncoding |
| ASHGA5P031130 | 0.0004765   | 0.015255446 | 2.306828   | up | noncoding |
| ASHGA5P043361 | 0.00017198  | 0.011182026 | 5.9949398  | up | noncoding |
| ASHGA5P043361 | 0.00017198  | 0.011182026 | 5.9949398  | up | noncoding |
| ASHGA5P043361 | 0.00017198  | 0.011182026 | 5.9949398  | up | noncoding |
| ASHGA5P043361 | 0.00017198  | 0.011182026 | 5.9949398  | up | noncoding |
| ASHGA5P033014 | 0.001377148 | 0.024808723 | 2.4859323  | up | noncoding |
| ASHGA5P033380 | 0.0002102   | 0.01146874  | 3.4541684  | up | noncoding |
| ASHGA5P033380 | 0.0002102   | 0.01146874  | 3.4541684  | up | noncoding |
| ASHGA5P028926 | 0.03182747  | 0.112017423 | 3.9463565  | up | noncoding |
| ASHGA5P022981 | 0.01612757  | 0.077717436 | 2.1123187  | up | noncoding |
| ASHGA5P053588 | 0.000843704 | 0.019498573 | 3.4628862  | up | noncoding |
| ASHGA5P018993 | 0.046839374 | 0.139710963 | 2.2944481  | up | noncoding |
| ASHGA5P022793 | 0.037808035 | 0.123545266 | 3.3375087  | up | noncoding |
| ASHGA5P057875 | 0.020864253 | 0.088884901 | 2.0397438  | up | noncoding |
| ASHGA5P019333 | 5.78897E-05 | 0.007736798 | 2.0630134  | up | noncoding |
| ASHGA5P045847 | 6.16573E-05 | 0.007847253 | 4.3784336  | up | noncoding |
| ASHGA5P000402 | 0.001623434 | 0.027071307 | 2.5585251  | up | noncoding |
| ASHGA5P030704 | 0.004883818 | 0.044366328 | 2.1401259  | up | noncoding |
| ASHGA5P023163 | 0.036221777 | 0.120725876 | 2.4160678  | up | noncoding |
| ASHGA5P041069 | 0.004865324 | 0.044314367 | 2.4015762  | up | noncoding |
| ASHGA5P041069 | 0.004865324 | 0.044314367 | 2.4015762  | up | noncoding |
| ASHGA5P021844 | 0.000234398 | 0.011897921 | 2.9975855  | up | noncoding |
| ASHGA5P021844 | 0.000234398 | 0.011897921 | 2.9975855  | up | noncoding |
| ASHGA5P021844 | 0.000234398 | 0.011897921 | 2.9975855  | up | noncoding |
| ASHGA5P030044 | 0.014787132 | 0.074317791 | 2.6043575  | up | noncoding |
| ASHGA5P030044 | 0.014787132 | 0.074317791 | 2.6043575  | up | noncoding |
| ASHGA5P030044 | 0.014787132 | 0.074317791 | 2.6043575  | up | noncoding |
| ASHGA5P030044 | 0.014787132 | 0.074317791 | 2.6043575  | up | noncoding |
| ASHGA5P030044 | 0.014787132 | 0.074317791 | 2.6043575  | up | noncoding |
| ASHGA5P051828 | 0.001549201 | 0.026466815 | 3.6392324  | up | noncoding |
| ASHGA5P040127 | 0.00280232  | 0.034179323 | 2.0379068  | up | noncoding |
| ASHGA5P045185 | 0.002217407 | 0.031027561 | 5.4211114  | up | noncoding |
| ASHGA5P025670 | 0.000635973 | 0.017037535 | 2.2520048  | up | noncoding |
| ASHGA5P042197 | 0.018830222 | 0.083422655 | 2.789138   | up | noncoding |
| ASHGA5P042197 | 0.018830222 | 0.083422655 | 2.789138   | up | noncoding |
| ASHGA5P030534 | 0.001680394 | 0.027439569 | 2.5835416  | up | noncoding |
| ASHGA5P014191 | 0.02224917  | 0.092228003 | 2.0231116  | up | noncoding |
| ASHGA5P039618 | 0.004222777 | 0.041294942 | 2.194141   | up | noncoding |
| ASHGA5P039278 | 0.00281339  | 0.03419731  | 2.022336   | up | noncoding |
| ASHGA5P019434 | 0.001911125 | 0.02921028  | 2.4731443  | up | noncoding |
| ASHGA5P019434 | 0.001911125 | 0.02921028  | 2.4731443  | up | noncoding |
| ASHGA5P048185 | 0.000285994 | 0.012492602 | 3.5032379  | up | noncoding |
| ASHGA5P048185 | 0.000285994 | 0.012492602 | 3.5032379  | up | noncoding |
| ASHGA5P048185 | 0.000285994 | 0.012492602 | 3.5032379  | up | noncoding |
| ASHGA5P049224 | 0.00077113  | 0.018599313 | 18.0466494 | up | noncoding |
| ASHGA5P053397 | 0.00225597  | 0.031214119 | 3.3583506  | up | noncoding |
| ASHGA5P053397 | 0.00225597  | 0.031214119 | 3.3583506  | up | noncoding |
| ASHGA5P014621 | 0.000101942 | 0.009142535 | 4.0173029  | up | noncoding |
| ASHGA5P014621 | 0.000101942 | 0.009142535 | 4.0173029  | up | noncoding |
| ASHGA5P014621 | 0.000101942 | 0.009142535 | 4.0173029  | up | noncoding |
| ASHGA5P036933 | 0.012370774 | 0.068149498 | 2.3446608  | up | noncoding |
| ASHGA5P038097 | 0.023051357 | 0.094014124 | 2.7029897  | up | noncoding |
| ASHGA5P016309 | 0.016099042 | 0.07768932  | 2.7899708  | up | noncoding |
| ASHGA5P016309 | 0.016099042 | 0.07768932  | 2.7899708  | up | noncoding |
| ASHGA5P055227 | 0.014174401 | 0.07308451  | 2.308871   | up | noncoding |



|                    |                    |                     |       |       |   |
|--------------------|--------------------|---------------------|-------|-------|---|
| ENST00000456944    | RP11-82L18.2       | GENCODE             | 583   | chr9  | - |
| uc003bcm.3         | BC038245           | UCSC_knowngene      | 1076  | chr22 | - |
| uc001uzl.3         | BC025370           | UCSC_knowngene      | 978   | chr13 | - |
| ENST00000553791    | RP11-718G2.5       | GENCODE             | 448   | chr14 | + |
| NR_040535          | LOC100506472       | RefSeq              | 3566  | chr22 | + |
| ENST00000568031    | RP11-863P13.7      | GENCODE             | 1313  | chr16 | - |
| DB308297           |                    | LincRNAs identified | 526   | chr8  | - |
| ENST00000567422    | RP11-23E10.4       | pseudogene          | 509   | chr16 | - |
| NR_033999          | LOC100129148       | RefSeq              | 463   | chr7  | - |
| NR_033999          | LOC100129148       | RefSeq              | 463   | chr7  | - |
| NR_033999          | LOC100129148       | RefSeq              | 463   | chr7  | - |
| NR_033999          | LOC100129148       | RefSeq              | 463   | chr7  | - |
| ENST00000581019    | CTD-2349P21.5      | GENCODE             | 789   | chr17 | + |
| NR_040017          | RNF157-AS1         | RefSeq              | 2177  | chr17 | + |
| NR_040017          | RNF157-AS1         | RefSeq              | 2177  | chr17 | + |
| ENST00000435024    | LINC00460          | GENCODE             | 631   | chr13 | + |
| ENST00000567053    | RP11-578F21.10     | pseudogene          | 138   | chr15 | + |
| ENST00000523031    | RP13-582O9.5       | GENCODE             | 689   | chr8  | - |
| ENST00000463567    | ZNF767             | GENCODE             | 3520  | chr7  | - |
| ENST00000562920    | RP11-23P13.6       | GENCODE             | 400   | chr15 | + |
| TCONS_00022963     | XLOC_010798        | LincRNAs identified | 257   | chr14 | + |
| ENST00000478666    | FAM86DP            | GENCODE             | 1068  | chr3  | - |
| uc004aus.1         | BC042913           | UCSC_knowngene      | 1164  | chr9  | + |
| chr3:45182150-4519 | chr3:45182150-4519 | LincRNAs identified | 14250 | chr3  | + |
| uc010bmd.3         | AGSK1              | UCSC_knowngene      | 2405  | chr15 | + |
| ENST00000571970    | RP11-95P2.1        | GENCODE             | 753   | chr16 | - |
| ENST00000569313    | CTD-2636A23.2      | GENCODE             | 643   | chr5  | + |
| ENST00000569313    | CTD-2636A23.2      | GENCODE             | 643   | chr5  | + |
| ENST00000542112    | SNHG1              | GENCODE             | 780   | chr11 | - |
| ENST00000542112    | SNHG1              | GENCODE             | 780   | chr11 | - |
| ENST00000542112    | SNHG1              | GENCODE             | 780   | chr11 | - |
| ENST00000429648    | RP11-21N7.2        | GENCODE             | 301   | chr1  | - |
| ENST00000429648    | RP11-21N7.2        | GENCODE             | 301   | chr1  | - |
| ENST00000429648    | RP11-21N7.2        | GENCODE             | 301   | chr1  | - |
| ENST00000429648    | RP11-21N7.2        | GENCODE             | 301   | chr1  | - |
| ENST00000429648    | RP11-21N7.2        | GENCODE             | 301   | chr1  | - |
| ENST00000397644    | RP11-513G11.1      | GENCODE             | 416   | chr3  | - |
| ENST00000514752    | SLC7A11-AS1        | GENCODE             | 764   | chr4  | + |
| ENST00000437601    | RP4-781K5.8        | GENCODE             | 3574  | chr1  | + |
| uc001nhf.1         | LOC646813          | UCSC_knowngene      | 609   | chr11 | + |
| uc003qxa.1         | AK128656           | UCSC_knowngene      | 2322  | chr6  | - |
| uc003qxa.1         | AK128656           | UCSC_knowngene      | 2322  | chr6  | - |
| ENST00000558593    | CTD-3110H11.2      | GENCODE             | 507   | chr15 | + |
| ENST00000578492    | RP13-104F24.2      | GENCODE             | 2732  | chr17 | - |
| ENST00000514727    | PPP1R14BP3         | pseudogene          | 442   | chr4  | - |
| uc021xjv.1         | BC040733           | UCSC_knowngene      | 1061  | chr3  | + |
| ENST00000484076    | RP11-18H7.1        | GENCODE             | 969   | chr3  | + |
| ENST00000484076    | RP11-18H7.1        | GENCODE             | 969   | chr3  | + |
| ENST00000545308    | SNHG1              | GENCODE             | 646   | chr11 | - |
| ENST00000545308    | SNHG1              | GENCODE             | 646   | chr11 | - |
| ENST00000545308    | SNHG1              | GENCODE             | 646   | chr11 | - |
| ENST00000558031    | CRNDE              | GENCODE             | 464   | chr16 | - |
| ENST00000412059    | GAS5               | GENCODE             | 979   | chr1  | - |
| ENST00000412059    | GAS5               | GENCODE             | 979   | chr1  | - |
| NR_024533          | ALG3               | RefSeq              | 1450  | chr3  | - |
| NR_024533          | ALG3               | RefSeq              | 1450  | chr3  | - |
| NR_024533          | ALG3               | RefSeq              | 1450  | chr3  | - |
| NR_033917          | LOC728228          | RefSeq              | 692   | chr20 | + |
| NR_027007          | LOC440944          | RefSeq              | 1890  | chr3  | - |
| ENST00000429139    | MIR181A2HG         | GENCODE             | 662   | chr9  | + |
| ENST00000429139    | MIR181A2HG         | GENCODE             | 662   | chr9  | + |
| NR_046986          | KIRREL3-AS2        | RefSeq              | 500   | chr11 | + |

|           |           |                    |                                        |                       |
|-----------|-----------|--------------------|----------------------------------------|-----------------------|
| 91703518  | 91724213  |                    | CTGGTGACCTTTCTACTGATTGCATT             | intron sense-overlapp |
| 42760534  | 42765180  |                    | GTTTTTCAGGTTTCTGCCTGACATTTA            | intergenic            |
| 44974385  | 44980021  |                    | TGCTTTTGAACGTGAAAGGAGAAAC              | intergenic            |
| 70742012  | 70758576  |                    | AATCTGGAATATTTCAAGATAAGGT              | intergenic            |
| 39828164  | 39833133  |                    | GCAAAGATTAA. 100506472                 | exon sense-overlappi  |
| 88210903  | 88212216  |                    | TAATATCCTGATTTCAGTGGACTTGC             | intergenic            |
| 90904271  | 90904797  |                    | CATTTTGTAGTGTGTGTTGCAGTATTTI           | intergenic            |
| 33365496  | 33373402  |                    | GCTCCTGAAGTTCCTTGTGTTGTGGACTGCTGGGTTTT |                       |
| 139102208 | 139112272 |                    | CTCTGGACCTGG/ 100129148                | natural antisense     |
| 139102208 | 139112272 |                    | CTCTGGACCTGG/ 100129148                | natural antisense     |
| 139102208 | 139112272 |                    | CTCTGGACCTGG/ 100129148                | natural antisense     |
| 139102208 | 139112272 |                    | CTCTGGACCTGG/ 100129148                | natural antisense     |
| 29056486  | 29057409  |                    | AGTTAATGTTCGGATCAACATCATTT             | intergenic            |
| 74136636  | 74150729  |                    | GTCAGGAACACC/ 100507218                | natural antisense     |
| 74136636  | 74150729  |                    | GTCAGGAACACC/ 100507218                | natural antisense     |
| 107028910 | 107030565 |                    | GACGAGGCATGT/ 728192                   | intergenic            |
| 29033747  | 29037148  |                    | AATATAAACATGTATGCAAACGAGCTTGTCAGAGAGC/ |                       |
| 144362330 | 144363019 |                    | ATCACAAGTCTGTAAAGTTGGAGA               | intergenic            |
| 149244244 | 149321818 |                    | GTCCCCTAAGAC/ 79970                    | intergenic            |
| 42187382  | 42188141  |                    | GTGTGATGTTCTCAACGGCAGCTAA              | intergenic            |
| 36690499  | 36691569  |                    | TTGAGAGCAGGAAGTATAACCTCT               | intergenic            |
| 75471569  | 75484197  | ENST00000489609,   | TCATCAAAAAGA/ 692099                   | intergenic            |
| 97317350  | 97330409  | ENST00000452148,   | GAGAGGAAGAAGTTACATTGTCGTA              | natural antisense     |
| 45207146  | 45221396  |                    | AAGATGTTTGAAGAAAACATGACC               | intergenic            |
| 82944792  | 82975798  | ENST00000335068,   | AAAGACACCTGT/ 80154                    | intergenic            |
| 4296374   | 4301499   | NR_039999          | TTGCCTGTTCTAGAAGCTTGTATCAC             | intergenic            |
| 43289496  | 43290941  |                    | ATTGGAGATTAGTACCTCTGCTTTC/             | natural antisense     |
| 43289496  | 43290941  |                    | ATTGGAGATTAGTACCTCTGCTTTC/             | natural antisense     |
| 62619729  | 62623386  |                    | AGATTCGTTCTC/ 23642                    | bidirectional         |
| 62619729  | 62623386  |                    | AGATTCGTTCTC/ 23642                    | bidirectional         |
| 62619729  | 62623386  |                    | AGATTCGTTCTC/ 23642                    | bidirectional         |
| 155279828 | 155280381 |                    | TTTTCTTGGGCATAAACATCTGAAT/             | intronic antisense    |
| 155279828 | 155280381 |                    | TTTTCTTGGGCATAAACATCTGAAT/             | natural antisense     |
| 155279828 | 155280381 |                    | TTTTCTTGGGCATAAACATCTGAAT/             | natural antisense     |
| 155279828 | 155280381 |                    | TTTTCTTGGGCATAAACATCTGAAT/             | natural antisense     |
| 155279828 | 155280381 |                    | TTTTCTTGGGCATAAACATCTGAAT/             | natural antisense     |
| 194019234 | 194023820 | ENST00000414120,   | GTGCTATGCCGCGTCAAAAGAGTAT              | intergenic            |
| 139026872 | 139090561 |                    | CTGTGTCTTCTCA/ 641364                  | natural antisense     |
| 234861147 | 234867390 | NR_038856          | CCAACAATCATTCTTTCTCGCATATT             | intergenic            |
| 50368317  | 50379803  |                    | GAGACATTAATG/ 646813                   | intergenic            |
| 170060912 | 170063234 |                    | CCTTTAAACTTGACGGATGCATTTA/             | exon sense-overlappi  |
| 170060912 | 170063234 |                    | CCTTTAAACTTGACGGATGCATTTA/             | exon sense-overlappi  |
| 50648667  | 50659636  | NR_024490, uc001z, | TGGAATGGGACTAGAGAAGCAATT/              | intergenic            |
| 62745780  | 62777744  | ENST00000400873    | GACATAACCAGCTTTCTCCCTTTGTCT            | intergenic            |
| 140036086 | 140036528 | NM_001031801, NM   | ATTTCTGGTCTGCTGGACAAGATCCGGGGCATGCAGAA |                       |
| 197371037 | 197373038 |                    | GCAATCTACTTATGTCCAAGGTGAA              | intergenic            |
| 119813741 | 119855630 |                    | ACAGAACAAAGTGAGTGGAGGACA/              | bidirectional         |
| 119813741 | 119855630 |                    | ACAGAACAAAGTGAGTGGAGGACA/              | bidirectional         |
| 62621913  | 62622960  |                    | TATGAATAAGCT/ 23642                    | bidirectional         |
| 62621913  | 62622960  |                    | TATGAATAAGCT/ 23642                    | bidirectional         |
| 62621913  | 62622960  |                    | TATGAATAAGCT/ 23642                    | bidirectional         |
| 54952965  | 54957691  |                    | TTTTTCTTTTTAA/ 643911                  | intergenic            |
| 173833038 | 173837125 | ENST00000454813,   | TTATCCTAAACT/ 60674                    | bidirectional         |
| 173833038 | 173837125 | ENST00000454813,   | TTATCCTAAACT/ 60674                    | bidirectional         |
| 183960116 | 183966759 |                    | AGGGTGGCATGT. 10195                    | exon sense-overlappi  |
| 183960116 | 183966759 |                    | AGGGTGGCATGT. 10195                    | exon sense-overlappi  |
| 183960116 | 183966759 |                    | AGGGTGGCATGT. 10195                    | natural antisense     |
| 4173736   | 4176600   |                    | GATTCTCCGTGAC/ 728228                  | intergenic            |
| 9430536   | 9439174   |                    | GAAATATGAAA/ 440944                    | bidirectional         |
| 127420745 | 127460910 |                    | G TTCAGGACTACTTCGGTTCCTTTTAC           | intronic antisense    |
| 127420745 | 127460910 |                    | G TTCAGGACTACTTCGGTTCCTTTTAC           | intronic antisense    |
| 126810641 | 126814986 |                    | GCCTTGTCCTTAC/ 100874251               | intronic antisense    |

|                         |                |                          |           |           |
|-------------------------|----------------|--------------------------|-----------|-----------|
| NM_016848               | SHC3           | SHC-transforming pr -    | 91620685  | 91793682  |
| NM_153497               | TAB1           | TGF-beta-activated k +   | 39795758  | 39833132  |
| [AGGAGTTATTCTTTTTATCTG  |                |                          |           |           |
| NM_001244584            | C7orf55-LUC7L2 | C7orf55-LUC7L2 pr +      | 139025877 | 139108203 |
| NM_001244585            | LUC7L2         | putative RNA-bindin +    | 139025104 | 139108203 |
| NM_001270643            | LUC7L2         | putative RNA-bindin +    | 139044591 | 139108203 |
| NM_016019               | LUC7L2         | putative RNA-bindin +    | 139044591 | 139108203 |
| NM_001454               | FOXJ1          | forkhead box protein -   | 74132414  | 74137380  |
| NM_052916               | RNF157         | RING finger protein -    | 74138533  | 74236390  |
| AATTGAAAAGCTGCAGGCGGGTG |                |                          |           |           |
| NM_003837               | FBP2           | fructose-1,6-bisphosf -  | 97321002  | 97356075  |
| NM_001098272            | HMGCS1         | hydroxymethylglutar -    | 43287571  | 43313614  |
| NM_002130               | HMGCS1         | hydroxymethylglutar -    | 43287571  | 43313614  |
| NM_001012662            | SLC3A2         | 4F2 cell-surface antiç + | 62623483  | 62656355  |
| NM_001012664            | SLC3A2         | 4F2 cell-surface antiç + | 62623483  | 62656355  |
| NM_002394               | SLC3A2         | 4F2 cell-surface antiç + | 62623483  | 62656355  |
| NM_001242825            | FDPS           | farnesyl pyrophospha +   | 155278538 | 155290457 |
| NM_001135821            | FDPS           | farnesyl pyrophospha +   | 155278704 | 155290457 |
| NM_001135822            | FDPS           | farnesyl pyrophospha +   | 155278538 | 155290457 |
| NM_001242824            | FDPS           | farnesyl pyrophospha +   | 155278538 | 155290457 |
| NM_002004               | FDPS           | farnesyl pyrophospha +   | 155278538 | 155290457 |
| NM_014331               | SLC7A11        | cystine/glutamate tra -  | 139085247 | 139163503 |
| NM_001202550            | WDR27          | WD repeat-containin -    | 169857302 | 170102159 |
| NM_182552               | WDR27          | WD repeat-containin -    | 169857302 | 170102159 |
| AGCTGAGCACACCCCAAGAAG   |                |                          |           |           |
| NM_001146156            | GSK3B          | glycogen synthase ki -   | 119540801 | 119813264 |
| NM_002093               | GSK3B          | glycogen synthase ki -   | 119540801 | 119813264 |
| NM_001012662            | SLC3A2         | 4F2 cell-surface antiç + | 62623483  | 62656355  |
| NM_001012664            | SLC3A2         | 4F2 cell-surface antiç + | 62623483  | 62656355  |
| NM_002394               | SLC3A2         | 4F2 cell-surface antiç + | 62623483  | 62656355  |
| NM_001122770            | ZBTB37         | zinc finger and BTB +    | 173837492 | 173855774 |
| NM_032522               | ZBTB37         | zinc finger and BTB +    | 173837492 | 173842778 |
| NM_001006941            | ALG3           | dol-P-Man:Man(5)G -      | 183960116 | 183967313 |
| NM_005787               | ALG3           | dol-P-Man:Man(5)G -      | 183960116 | 183966759 |
| NM_138345               | VWA5B2         | von Willebrand facto +   | 183948316 | 183960117 |
| NM_001080517            | SETD5          | SET domain-containi +    | 9439402   | 9519838   |
| NM_001489               | NR6A1          | nuclear receptor subf -  | 127284702 | 127533576 |
| NM_033334               | NR6A1          | nuclear receptor subf -  | 127284702 | 127533576 |
| NM_001161707            | KIRREL3        | kin of IRRE-like prot -  | 126300836 | 126870766 |

|             |             |           |           |           |           |
|-------------|-------------|-----------|-----------|-----------|-----------|
| 1040.651992 | 211.75648   | 9.411789  | 8.085632  | 1503.1417 | 1941.9781 |
| 150.935791  | 40.640862   | 6.751616  | 5.643213  | 216.51558 | 119.9591  |
| 1422.246783 | 260.152998  | 10.002752 | 8.150192  | 1342.7349 | 1159.7252 |
| 52.063556   | 11.952199   | 5.241928  | 3.765411  | 37.105717 | 16.6258   |
| 25.603438   | 7.600985    | 4.158084  | 2.880319  | 49.97546  | 8.55285   |
| 123.800505  | 16.928058   | 6.383766  | 4.230833  | 126.7496  | 128.78178 |
| 471.473488  | 78.570577   | 8.031843  | 6.394845  | 194.03473 | 91.10134  |
| 842.06797   | 216.989242  | 9.316395  | 8.110485  | 900.4693  | 915.2186  |
| 502.63212   | 34.816228   | 7.772775  | 5.18903   | 798.4984  | 1438.778  |
| 502.63212   | 34.816228   | 7.772775  | 5.18903   | 798.4984  | 1438.778  |
| 502.63212   | 34.816228   | 7.772775  | 5.18903   | 798.4984  | 1438.778  |
| 502.63212   | 34.816228   | 7.772775  | 5.18903   | 798.4984  | 1438.778  |
| 91.553634   | 23.225485   | 6.13149   | 4.817703  | 101.04339 | 120.5165  |
| 113.998215  | 21.305172   | 6.204566  | 4.416228  | 68.9523   | 18.64984  |
| 113.998215  | 21.305172   | 6.204566  | 4.416228  | 68.9523   | 18.64984  |
| 112.707217  | 16.030412   | 5.880828  | 3.900306  | 83.87451  | 12.779148 |
| 511.323123  | 138.989773  | 8.509151  | 7.430324  | 407.71472 | 542.5382  |
| 266.455152  | 51.15093    | 7.671084  | 5.879109  | 233.65384 | 235.82794 |
| 2176.22405  | 633.309688  | 10.5235   | 9.325353  | 2239.501  | 2493.2463 |
| 162.173762  | 32.062348   | 6.817402  | 5.07863   | 161.82901 | 170.5464  |
| 18.075022   | 6.594224    | 3.834393  | 2.806005  | 22.226925 | 23.239782 |
| 641.642827  | 176.73412   | 8.859587  | 7.814834  | 637.851   | 890.23083 |
| 2773.171233 | 375.460775  | 10.917862 | 8.787447  | 3267.0154 | 2529.036  |
| 155.788733  | 43.326232   | 6.925077  | 5.569765  | 186.4678  | 166.85725 |
| 10112.111   | 2653.818683 | 12.820762 | 11.723066 | 9979.395  | 13258.532 |
| 64.46809    | 25.561374   | 5.665127  | 4.392466  | 62.89299  | 47.736553 |
| 48.37697    | 15.90732    | 5.23074   | 3.966758  | 45.539516 | 28.361303 |
| 48.37697    | 15.90732    | 5.23074   | 3.966758  | 45.539516 | 28.361303 |
| 24.93385    | 5.735289    | 4.296158  | 2.712357  | 28.271288 | 26.968954 |
| 24.93385    | 5.735289    | 4.296158  | 2.712357  | 28.271288 | 26.968954 |
| 24.93385    | 5.735289    | 4.296158  | 2.712357  | 28.271288 | 26.968954 |
| 191.367452  | 57.330887   | 7.217238  | 5.836311  | 196.58112 | 221.04942 |
| 191.367452  | 57.330887   | 7.217238  | 5.836311  | 196.58112 | 221.04942 |
| 191.367452  | 57.330887   | 7.217238  | 5.836311  | 196.58112 | 221.04942 |
| 191.367452  | 57.330887   | 7.217238  | 5.836311  | 196.58112 | 221.04942 |
| 191.367452  | 57.330887   | 7.217238  | 5.836311  | 196.58112 | 221.04942 |
| 191.367452  | 57.330887   | 7.217238  | 5.836311  | 196.58112 | 221.04942 |
| 57.235961   | 10.778695   | 5.406198  | 3.542563  | 63.462086 | 25.170422 |
| 18.294802   | 6.004981    | 3.833503  | 2.806415  | 17.146624 | 25.98442  |
| 209.331521  | 19.400347   | 6.967446  | 4.528857  | 325.38428 | 309.40436 |
| 764.017777  | 200.162077  | 9.11911   | 7.9479    | 875.5744  | 1007.7526 |
| 26.114081   | 6.979532    | 4.252647  | 2.772827  | 56.0507   | 23.607018 |
| 26.114081   | 6.979532    | 4.252647  | 2.772827  | 56.0507   | 23.607018 |
| 232.301277  | 51.70712    | 7.341661  | 5.972311  | 269.96786 | 461.26532 |
| 1073.793818 | 357.539752  | 9.633754  | 8.617178  | 1201.2804 | 923.54346 |
| 5222.738533 | 1292.158433 | 11.829721 | 10.696065 | 6122.101  | 6997.644  |
| 22.639128   | 8.343019    | 4.134003  | 3.117981  | 20.916672 | 13.347911 |
| 493.538982  | 118.236518  | 8.465878  | 7.159532  | 362.11575 | 380.01108 |
| 493.538982  | 118.236518  | 8.465878  | 7.159532  | 362.11575 | 380.01108 |
| 390.994727  | 69.202001   | 8.209996  | 6.401307  | 421.19617 | 314.16855 |
| 390.994727  | 69.202001   | 8.209996  | 6.401307  | 421.19617 | 314.16855 |
| 390.994727  | 69.202001   | 8.209996  | 6.401307  | 421.19617 | 314.16855 |
| 1573.854447 | 53.787365   | 9.974668  | 5.801009  | 1218.1853 | 308.80548 |
| 11626.30567 | 1978.552317 | 13.027916 | 11.280163 | 11000.318 | 8719.194  |
| 11626.30567 | 1978.552317 | 13.027916 | 11.280163 | 11000.318 | 8719.194  |
| 95.36472    | 15.402231   | 6.215373  | 4.209145  | 92.93633  | 106.73032 |
| 95.36472    | 15.402231   | 6.215373  | 4.209145  | 92.93633  | 106.73032 |
| 95.36472    | 15.402231   | 6.215373  | 4.209145  | 92.93633  | 106.73032 |
| 210.57565   | 41.233394   | 6.787628  | 5.558248  | 339.56528 | 592.112   |
| 906.041238  | 281.448288  | 9.415469  | 7.980913  | 862.0877  | 690.8251  |
| 107.068955  | 21.603293   | 6.119022  | 4.638772  | 142.37143 | 213.09825 |
| 107.068955  | 21.603293   | 6.119022  | 4.638772  | 142.37143 | 213.09825 |
| 986.085578  | 245.662301  | 9.345168  | 8.13798   | 1042.53   | 1134.4802 |

|            |           |           |            |           |           |
|------------|-----------|-----------|------------|-----------|-----------|
| 1021.743   | 357.96695 | 689.1698  | 729.9124   | 193.81013 | 252.10959 |
| 275.2881   | 98.82596  | 89.72919  | 105.296814 | 31.666756 | 32.860043 |
| 1450.8539  | 730.6404  | 1992.195  | 1857.3313  | 243.50214 | 87.124115 |
| 56.78644   | 72.52953  | 55.99419  | 73.33966   | 7.3367887 | 5.6573777 |
| 39.449646  | 23.634468 | 15.365139 | 16.643068  | 5.297188  | 4.9999995 |
| 208.4493   | 29.283642 | 127.43228 | 122.10643  | 10.13496  | 8.8325205 |
| 284.01874  | 1116.9996 | 301.74188 | 840.94464  | 81.88325  | 23.646336 |
| 750.12006  | 905.2151  | 640.9992  | 940.38556  | 175.11067 | 169.73965 |
| 95.98184   | 388.36432 | 47.263153 | 246.90701  | 54.34106  | 67.18685  |
| 95.98184   | 388.36432 | 47.263153 | 246.90701  | 54.34106  | 67.18685  |
| 95.98184   | 388.36432 | 47.263153 | 246.90701  | 54.34106  | 67.18685  |
| 95.98184   | 388.36432 | 47.263153 | 246.90701  | 54.34106  | 67.18685  |
| 74.458725  | 61.851963 | 84.85659  | 106.594635 | 24.59682  | 16.757032 |
| 106.8888   | 152.20961 | 146.06381 | 191.22493  | 8.788076  | 5.0068173 |
| 106.8888   | 152.20961 | 146.06381 | 191.22493  | 8.788076  | 5.0068173 |
| 122.3504   | 27.099625 | 232.26389 | 197.87573  | 6.5741005 | 6.265749  |
| 228.15108  | 802.3153  | 390.82224 | 696.3972   | 148.03731 | 100.84601 |
| 226.68108  | 359.29953 | 219.62292 | 323.6456   | 44.51372  | 24.702955 |
| 1522.0673  | 720.7289  | 3221.4082 | 2860.3926  | 748.6003  | 258.0758  |
| 158.67865  | 46.15737  | 243.43318 | 192.39796  | 23.170609 | 6.503676  |
| 17.869669  | 17.923971 | 12.02822  | 15.161568  | 4.9999995 | 4.9999995 |
| 337.41165  | 423.08868 | 823.4283  | 737.8465   | 172.866   | 189.49434 |
| 3473.046   | 1025.6407 | 3352.3    | 2991.9893  | 307.31564 | 199.435   |
| 158.35538  | 142.7472  | 136.62657 | 143.6782   | 43.844856 | 25.722551 |
| 6101.351   | 8154.715  | 10962.267 | 12216.406  | 2694.738  | 1354.8893 |
| 75.09598   | 67.12277  | 59.180332 | 74.779915  | 35.22195  | 5.083777  |
| 57.511875  | 44.565125 | 50.12643  | 64.15757   | 14.364501 | 4.9999995 |
| 57.511875  | 44.565125 | 50.12643  | 64.15757   | 14.364501 | 4.9999995 |
| 22.146978  | 17.410955 | 26.63162  | 28.173307  | 4.9999995 | 6.2616725 |
| 22.146978  | 17.410955 | 26.63162  | 28.173307  | 4.9999995 | 6.2616725 |
| 22.146978  | 17.410955 | 26.63162  | 28.173307  | 4.9999995 | 6.2616725 |
| 158.54224  | 187.85191 | 175.20741 | 208.97261  | 74.09805  | 21.545378 |
| 158.54224  | 187.85191 | 175.20741 | 208.97261  | 74.09805  | 21.545378 |
| 158.54224  | 187.85191 | 175.20741 | 208.97261  | 74.09805  | 21.545378 |
| 158.54224  | 187.85191 | 175.20741 | 208.97261  | 74.09805  | 21.545378 |
| 158.54224  | 187.85191 | 175.20741 | 208.97261  | 74.09805  | 21.545378 |
| 158.54224  | 187.85191 | 175.20741 | 208.97261  | 74.09805  | 21.545378 |
| 92.33842   | 71.02013  | 35.45313  | 55.971577  | 7.8770094 | 7.4456563 |
| 13.956819  | 14.043661 | 18.033058 | 20.60423   | 4.9999995 | 5.331788  |
| 305.94382  | 174.48065 | 25.313812 | 115.462204 | 19.843748 | 24.812908 |
| 590.84796  | 388.4696  | 848.4497  | 873.0124   | 240.38818 | 157.749   |
| 19.380522  | 21.155582 | 14.611749 | 21.878918  | 4.9999995 | 4.9999995 |
| 19.380522  | 21.155582 | 14.611749 | 21.878918  | 4.9999995 | 4.9999995 |
| 108.36612  | 202.7969  | 140.97333 | 210.43813  | 59.50132  | 58.95743  |
| 843.41815  | 710.5013  | 1458.0734 | 1305.9462  | 337.94202 | 136.6342  |
| 4200.414   | 2211.3608 | 6273.5674 | 5531.344   | 1172.5321 | 816.7846  |
| 25.432402  | 37.71492  | 14.899751 | 23.52311   | 5.9845214 | 4.9999995 |
| 347.18134  | 877.90076 | 333.6875  | 660.33746  | 100.7786  | 55.45244  |
| 347.18134  | 877.90076 | 333.6875  | 660.33746  | 100.7786  | 55.45244  |
| 484.92905  | 270.52847 | 403.87457 | 451.27155  | 53.086838 | 56.439415 |
| 484.92905  | 270.52847 | 403.87457 | 451.27155  | 53.086838 | 56.439415 |
| 484.92905  | 270.52847 | 403.87457 | 451.27155  | 53.086838 | 56.439415 |
| 2104.7295  | 2386.8716 | 1235.8998 | 2188.635   | 44.070038 | 35.95779  |
| 11679.888  | 17205.934 | 7037.106  | 14115.394  | 1422.5919 | 1128.1028 |
| 11679.888  | 17205.934 | 7037.106  | 14115.394  | 1422.5919 | 1128.1028 |
| 74.03448   | 99.34806  | 80.78832  | 118.35081  | 15.423068 | 13.1439   |
| 74.03448   | 99.34806  | 80.78832  | 118.35081  | 15.423068 | 13.1439   |
| 74.03448   | 99.34806  | 80.78832  | 118.35081  | 15.423068 | 13.1439   |
| 51.73742   | 102.41029 | 72.17394  | 105.45497  | 52.242012 | 65.92103  |
| 1000.86487 | 969.14996 | 763.2176  | 1150.1022  | 411.345   | 92.06969  |
| 25.737349  | 65.92589  | 93.35802  | 101.92279  | 24.017742 | 19.252762 |
| 25.737349  | 65.92589  | 93.35802  | 101.92279  | 24.017742 | 19.252762 |
| 498.95593  | 323.10864 | 1727.0693 | 1190.3694  | 299.50467 | 160.82173 |

|           |            |           |            |           |           |
|-----------|------------|-----------|------------|-----------|-----------|
| 175.55469 | 214.29091  | 247.46797 | 187.30559  | 10.086569 | 10.504383 |
| 40.011024 | 64.30053   | 35.58702  | 39.4198    | 7.3067083 | 6.679782  |
| 403.1685  | 117.89281  | 464.65155 | 244.57887  | 9.927773  | 9.827123  |
| 12.740811 | 15.507429  | 16.194138 | 14.27665   | 4.7482605 | 4.0658145 |
| 16.344902 | 4.9999995  | 4.9999995 | 8.963822   | 5.1800513 | 3.2088838 |
| 15.543469 | 34.080894  | 11.548129 | 21.428375  | 6.5360494 | 6.7782764 |
| 157.46921 | 54.14872   | 99.268036 | 55.007908  | 7.1501884 | 6.3026276 |
| 205.97876 | 258.00485  | 287.2007  | 205.90082  | 9.342271  | 9.502642  |
| 17.831673 | 35.56803   | 11.21361  | 22.756147  | 9.178617  | 10.115532 |
| 17.831673 | 35.56803   | 11.21361  | 22.756147  | 9.178617  | 10.115532 |
| 17.831673 | 35.56803   | 11.21361  | 22.756147  | 9.178617  | 10.115532 |
| 17.831673 | 35.56803   | 11.21361  | 22.756147  | 9.178617  | 10.115532 |
| 26.089176 | 30.093754  | 25.03811  | 16.778019  | 6.209666  | 6.6858573 |
| 28.700191 | 36.832615  | 26.438053 | 22.065277  | 5.649657  | 4.210272  |
| 28.700191 | 36.832615  | 26.438053 | 22.065277  | 5.649657  | 4.210272  |
| 45.815857 | 15.130148  | 9.094078  | 13.302541  | 5.938537  | 3.7204206 |
| 195.5508  | 118.07882  | 157.6051  | 113.8206   | 8.211056  | 8.774062  |
| 84.48712  | 38.842094  | 73.620735 | 40.738956  | 7.415809  | 7.6201086 |
| 1728.8364 | 308.3771   | 468.768   | 287.20053  | 10.6541   | 10.861384 |
| 39.948444 | 53.006626  | 31.318022 | 38.426712  | 6.882111  | 7.1775985 |
| 9.513489  | 4.9999995  | 8.406435  | 6.645421   | 4.0114455 | 4.4967422 |
| 153.96652 | 154.0975   | 229.26135 | 160.71901  | 8.843602  | 9.461089  |
| 506.13968 | 201.67282  | 661.27094 | 376.93057  | 11.196217 | 10.876938 |
| 99.352196 | 31.859398  | 25.67859  | 33.4998    | 7.089572  | 7.141159  |
| 4122.705  | 2390.3896  | 3055.697  | 2304.4932  | 12.800134 | 13.251185 |
| 73.3053   | 12.27902   | 17.569958 | 9.908241   | 5.518408  | 5.449081  |
| 26.870548 | 9.52076    | 23.046412 | 16.641699  | 5.050141  | 4.768037  |
| 26.870548 | 9.52076    | 23.046412 | 16.641699  | 5.050141  | 4.768037  |
| 4.9999995 | 5.1417427  | 8.008319  | 4.9999995  | 4.368171  | 4.6998987 |
| 4.9999995 | 5.1417427  | 8.008319  | 4.9999995  | 4.368171  | 4.6998987 |
| 4.9999995 | 5.1417427  | 8.008319  | 4.9999995  | 4.368171  | 4.6998987 |
| 144.62715 | 29.651913  | 39.1774   | 34.88543   | 7.1689568 | 7.5320888 |
| 144.62715 | 29.651913  | 39.1774   | 34.88543   | 7.1689568 | 7.5320888 |
| 144.62715 | 29.651913  | 39.1774   | 34.88543   | 7.1689568 | 7.5320888 |
| 144.62715 | 29.651913  | 39.1774   | 34.88543   | 7.1689568 | 7.5320888 |
| 144.62715 | 29.651913  | 39.1774   | 34.88543   | 7.1689568 | 7.5320888 |
| 11.90386  | 20.501863  | 4.9999995 | 11.943779  | 5.530241  | 4.607878  |
| 4.9999995 | 6.794838   | 5.2745876 | 8.628676   | 3.6272967 | 4.6513805 |
| 16.940948 | 28.21457   | 10.507231 | 16.082674  | 7.886812  | 7.9993567 |
| 297.7907  | 142.5979   | 220.814   | 141.63268  | 9.305759  | 9.630097  |
| 13.78618  | 4.9999995  | 8.091012  | 4.9999995  | 5.3450427 | 4.518482  |
| 13.78618  | 4.9999995  | 8.091012  | 4.9999995  | 5.3450427 | 4.518482  |
| 64.91044  | 56.57136   | 42.226543 | 28.075628  | 7.618684  | 8.541501  |
| 865.67737 | 268.5383   | 305.7924  | 230.65422  | 9.755366  | 9.513567  |
| 1521.857  | 1066.3477  | 1866.3464 | 1309.0828  | 12.088738 | 12.3176   |
| 16.02713  | 8.894947   | 5.434771  | 8.716743   | 3.9282544 | 3.7777586 |
| 117.56249 | 134.13528  | 177.07051 | 124.419785 | 8.0386095 | 8.2795515 |
| 117.56249 | 134.13528  | 177.07051 | 124.419785 | 8.0386095 | 8.2795515 |
| 67.356674 | 53.167313  | 111.90309 | 73.258675  | 8.259554  | 8.019411  |
| 67.356674 | 53.167313  | 111.90309 | 73.258675  | 8.259554  | 8.019411  |
| 67.356674 | 53.167313  | 111.90309 | 73.258675  | 8.259554  | 8.019411  |
| 34.236214 | 133.33778  | 15.409161 | 59.713207  | 9.776578  | 7.9972873 |
| 1568.6355 | 2218.3577  | 3249.5735 | 2284.0525  | 12.955497 | 12.631751 |
| 1568.6355 | 2218.3577  | 3249.5735 | 2284.0525  | 12.955497 | 12.631751 |
| 18.085112 | 10.469611  | 20.095343 | 15.19635   | 6.090537  | 6.5200653 |
| 18.085112 | 10.469611  | 20.095343 | 15.19635   | 6.090537  | 6.5200653 |
| 18.085112 | 10.469611  | 20.095343 | 15.19635   | 6.090537  | 6.5200653 |
| 36.58815  | 50.427402  | 17.437988 | 24.78378   | 7.954182  | 8.896972  |
| 778.2206  | 82.68021   | 201.5145  | 122.85973  | 9.290684  | 9.107395  |
| 26.11518  | 10.566531  | 33.56497  | 16.102571  | 6.702884  | 7.480156  |
| 26.11518  | 10.566531  | 33.56497  | 16.102571  | 6.702884  | 7.480156  |
| 422.1397  | 122.961136 | 334.55637 | 133.9902   | 9.551316  | 9.796671  |

|            |           |           |           |            |           |
|------------|-----------|-----------|-----------|------------|-----------|
| 9.622358   | 8.159922  | 9.165044  | 8.932458  | 7.845251   | 8.8365755 |
| 7.768841   | 6.276408  | 6.279671  | 6.198286  | 5.216419   | 5.876034  |
| 10.12784   | 9.206102  | 10.661901 | 10.26577  | 8.185551   | 7.298137  |
| 5.5134783  | 5.8187313 | 5.620864  | 5.684422  | 3.067297   | 3.237613  |
| 4.98702    | 4.073824  | 3.86529   | 3.633437  | 2.6147757  | 2.4279919 |
| 7.38896    | 4.4154334 | 6.77054   | 6.4133368 | 3.5659158  | 3.9177082 |
| 7.813798   | 9.801983  | 7.9894986 | 9.13296   | 6.5800357  | 5.3954463 |
| 9.200793   | 9.502182  | 9.05618   | 9.294303  | 7.705233   | 8.253856  |
| 6.262135   | 8.281423  | 5.3946185 | 7.404324  | 6.000153   | 6.924452  |
| 6.262135   | 8.281423  | 5.3946185 | 7.404324  | 6.000153   | 6.924452  |
| 6.262135   | 8.281423  | 5.3946185 | 7.404324  | 6.000153   | 6.924452  |
| 6.262135   | 8.281423  | 5.3946185 | 7.404324  | 6.000153   | 6.924452  |
| 5.901005   | 5.5746965 | 6.2010074 | 6.21671   | 4.862563   | 4.883322  |
| 6.421521   | 6.923353  | 6.9702573 | 7.0523367 | 3.3477747  | 3.0492284 |
| 6.421521   | 6.923353  | 6.9702573 | 7.0523367 | 3.3477747  | 3.0492284 |
| 6.6129704  | 4.2974625 | 7.613503  | 7.102073  | 2.9126093  | 3.3989067 |
| 7.5105324  | 9.332134  | 8.357673  | 8.869449  | 7.447483   | 7.5075865 |
| 7.500532   | 8.16674   | 7.533904  | 7.7894106 | 5.7077007  | 5.4579983 |
| 10.20178   | 9.184741  | 11.361345 | 10.877653 | 9.851195   | 8.868647  |
| 6.9759765  | 5.1246614 | 7.683593  | 7.06047   | 4.7756405  | 3.4580486 |
| 3.8407645  | 3.6248217 | 3.5320184 | 3.5005684 | 2.3467326  | 2.4279919 |
| 8.0651655  | 8.41722   | 9.422249  | 8.948195  | 7.681485   | 8.421829  |
| 11.395753  | 9.68511   | 11.417775 | 10.935378 | 8.530296   | 8.499079  |
| 6.972909   | 6.8336496 | 6.8693295 | 6.6438427 | 5.6865883  | 5.5198627 |
| 12.213274  | 12.640489 | 13.083119 | 12.936368 | 11.715728  | 11.282167 |
| 5.9124017  | 5.699424  | 5.697114  | 5.7143316 | 5.372783   | 3.0758946 |
| 5.5315475  | 5.06874   | 5.4713063 | 5.4946685 | 4.0726523  | 2.4279919 |
| 5.5315475  | 5.06874   | 5.4713063 | 5.4946685 | 4.0726523  | 2.4279919 |
| 4.1564403  | 3.5771267 | 4.6145225 | 4.360787  | 2.3467326  | 3.398107  |
| 4.1564403  | 3.5771267 | 4.6145225 | 4.360787  | 2.3467326  | 3.398107  |
| 4.1564403  | 3.5771267 | 4.6145225 | 4.360787  | 2.3467326  | 3.398107  |
| 6.975276   | 7.23111   | 7.22584   | 7.1701584 | 6.43744    | 5.2606497 |
| 6.975276   | 7.23111   | 7.22584   | 7.1701584 | 6.43744    | 5.2606497 |
| 6.975276   | 7.23111   | 7.22584   | 7.1701584 | 6.43744    | 5.2606497 |
| 6.975276   | 7.23111   | 7.22584   | 7.1701584 | 6.43744    | 5.2606497 |
| 6.975276   | 7.23111   | 7.22584   | 7.1701584 | 6.43744    | 5.2606497 |
| 6.2071757  | 5.784296  | 4.99504   | 5.312555  | 3.1750174  | 3.6577806 |
| 3.4764614  | 3.2339826 | 4.082072  | 3.9298244 | 2.3467326  | 3.1480198 |
| 7.919527   | 7.1222258 | 4.54796   | 6.328794  | 4.545515   | 5.4637485 |
| 8.844283   | 8.282152  | 9.468268  | 9.184099  | 8.164367   | 8.151084  |
| 3.9550972  | 3.8944898 | 3.7963645 | 4.0064034 | 2.3467326  | 2.4279919 |
| 3.9550972  | 3.8944898 | 3.7963645 | 4.0064034 | 2.3467326  | 2.4279919 |
| 6.440709   | 7.346869  | 6.9201193 | 7.182083  | 6.13182    | 6.732543  |
| 9.368111   | 9.16518   | 10.229125 | 9.771173  | 8.6693     | 7.9418917 |
| 11.687833  | 10.783394 | 12.291324 | 11.809436 | 10.4938545 | 10.532251 |
| 4.356322   | 4.8093066 | 3.8252258 | 4.107153  | 2.7836428  | 2.4279919 |
| 8.100062   | 9.46065   | 8.126455  | 8.78994   | 6.889906   | 6.64497   |
| 8.100062   | 9.46065   | 8.126455  | 8.78994   | 6.889906   | 6.64497   |
| 8.571802   | 7.7596226 | 8.40225   | 8.247339  | 5.9658046  | 6.673623  |
| 8.571802   | 7.7596226 | 8.40225   | 8.247339  | 5.9658046  | 6.673623  |
| 8.571802   | 7.7596226 | 8.40225   | 8.247339  | 5.9658046  | 6.673623  |
| 10.6862755 | 10.880724 | 10.006871 | 10.500271 | 5.6945286  | 6.013834  |
| 13.18249   | 13.763353 | 12.464699 | 13.169705 | 10.769582  | 11.017909 |
| 13.18249   | 13.763353 | 12.464699 | 13.169705 | 10.769582  | 11.017909 |
| 5.894843   | 6.2844825 | 6.1341906 | 6.368118  | 4.17912    | 4.5157228 |
| 5.894843   | 6.2844825 | 6.1341906 | 6.368118  | 4.17912    | 4.5157228 |
| 5.894843   | 6.2844825 | 6.1341906 | 6.368118  | 4.17912    | 4.5157228 |
| 5.3757563  | 6.329414  | 5.969233  | 6.200208  | 5.942523   | 6.9000835 |
| 9.596456   | 9.602419  | 9.313969  | 9.58189   | 8.941606   | 7.3743935 |
| 4.3745246  | 5.671168  | 6.3342543 | 6.151148  | 4.829273   | 5.0921373 |
| 4.3745246  | 5.671168  | 6.3342543 | 6.151148  | 4.829273   | 5.0921373 |
| 8.61194    | 8.014741  | 10.459863 | 9.6364765 | 8.493663   | 8.177273  |

|            |           |           |           |
|------------|-----------|-----------|-----------|
| 7.4080367  | 8.153408  | 8.207653  | 8.062866  |
| 5.319903   | 6.3073635 | 5.4279847 | 5.711576  |
| 8.612217   | 7.2367826 | 9.0998955 | 8.468567  |
| 3.7524185  | 4.0957503 | 4.290621  | 4.148764  |
| 4.0910144  | 2.3408759 | 2.3618152 | 3.4454384 |
| 4.0224533  | 5.3123045 | 3.8023777 | 4.764236  |
| 7.251147   | 6.035989  | 6.8887963 | 6.217654  |
| 7.6353045  | 8.441366  | 8.41455   | 8.212599  |
| 4.2084394  | 5.384291  | 3.7621272 | 4.8547153 |
| 4.2084394  | 5.384291  | 3.7621272 | 4.8547153 |
| 4.2084394  | 5.384291  | 3.7621272 | 4.8547153 |
| 4.2084394  | 5.384291  | 3.7621272 | 4.8547153 |
| 4.728639   | 5.1221275 | 4.916835  | 4.3927336 |
| 4.8657374  | 5.4349394 | 4.9928145 | 4.806872  |
| 4.8657374  | 5.4349394 | 4.9928145 | 4.806872  |
| 5.517534   | 4.0596166 | 3.4697275 | 4.0434446 |
| 7.5621157  | 7.239038  | 7.5286636 | 7.2970543 |
| 6.3679366  | 5.5157127 | 6.465309  | 5.759997  |
| 10.6966505 | 8.7208395 | 9.111173  | 8.703615  |
| 5.316615   | 6.003877  | 5.2436233 | 5.6739764 |
| 3.3620586  | 2.3408759 | 3.363959  | 2.994415  |
| 7.2148886  | 7.6431437 | 8.096182  | 7.831473  |
| 8.937437   | 8.056215  | 9.598484  | 9.103171  |
| 6.5937204  | 5.2045507 | 4.9528174 | 5.461048  |
| 11.985458  | 11.719634 | 11.847445 | 11.787963 |
| 6.170115   | 3.7339466 | 4.4078546 | 3.5942008 |
| 4.7704973  | 3.3477747 | 4.800864  | 4.3807707 |
| 4.7704973  | 3.3477747 | 4.800864  | 4.3807707 |
| 2.350709   | 2.5302544 | 3.2955859 | 2.352752  |
| 2.350709   | 2.5302544 | 3.2955859 | 2.352752  |
| 2.350709   | 2.5302544 | 3.2955859 | 2.352752  |
| 7.1342673  | 5.0994406 | 5.5615935 | 5.524474  |
| 7.1342673  | 5.0994406 | 5.5615935 | 5.524474  |
| 7.1342673  | 5.0994406 | 5.5615935 | 5.524474  |
| 7.1342673  | 5.0994406 | 5.5615935 | 5.524474  |
| 7.1342673  | 5.0994406 | 5.5615935 | 5.524474  |
| 3.6618996  | 4.51931   | 2.3618152 | 3.8795578 |
| 2.350709   | 2.8647172 | 2.7444959 | 3.3838146 |
| 4.1396093  | 5.021034  | 3.6750293 | 4.3282075 |
| 8.164114   | 7.5288925 | 8.038947  | 7.639994  |
| 3.8592794  | 2.3408759 | 3.309332  | 2.352752  |
| 3.8592794  | 2.3408759 | 3.309332  | 2.352752  |
| 6.002713   | 6.108493  | 5.6717625 | 5.186533  |
| 9.700099   | 8.50676   | 8.501679  | 8.383337  |
| 10.51125   | 10.572428 | 11.124279 | 10.942325 |
| 4.063998   | 3.252387  | 2.779829  | 3.4000354 |
| 6.838156   | 7.4346385 | 7.708908  | 7.440611  |
| 6.838156   | 7.4346385 | 7.708908  | 7.440611  |
| 6.0537663  | 6.009107  | 7.0620756 | 6.6434684 |
| 6.0537663  | 6.009107  | 7.0620756 | 6.6434684 |
| 6.0537663  | 6.009107  | 7.0620756 | 6.6434684 |
| 5.109831   | 7.424783  | 4.2188616 | 6.344214  |
| 10.553689  | 11.616222 | 11.9475   | 11.776076 |
| 10.553689  | 11.616222 | 11.9475   | 11.776076 |
| 4.231201   | 3.492522  | 4.5930915 | 4.2432156 |
| 4.231201   | 3.492522  | 4.5930915 | 4.2432156 |
| 4.231201   | 3.492522  | 4.5930915 | 4.2432156 |
| 5.1957746  | 5.928275  | 4.395814  | 4.98702   |
| 9.551316   | 6.6970463 | 7.9045277 | 7.4165874 |
| 4.7294884  | 3.5078642 | 5.3424053 | 4.3314667 |
| 4.7294884  | 3.5078642 | 5.3424053 | 4.3314667 |
| 8.675404   | 7.3042655 | 8.619994  | 7.5572824 |



|               |             |             |           |    |           |
|---------------|-------------|-------------|-----------|----|-----------|
| ASHGA5P055227 | 0.014174401 | 0.07308451  | 2.308871  | up | noncoding |
| ASHGA5P052791 | 1.73181E-06 | 0.002141141 | 2.3389504 | up | noncoding |
| ASHGA5P006992 | 2.23046E-05 | 0.005043652 | 2.5624044 | up | noncoding |
| ASHGA5P017466 | 0.027582768 | 0.103745399 | 2.5959087 | up | noncoding |
| ASHGA5P000098 | 0.036741272 | 0.121643972 | 2.0922378 | up | noncoding |
| ASHGA5P037175 | 0.023286972 | 0.094538063 | 2.0978609 | up | noncoding |
| ASHGA5P048066 | 0.034959566 | 0.118302079 | 2.0187558 | up | noncoding |
| ASHGA5P048066 | 0.034959566 | 0.118302079 | 2.0187558 | up | noncoding |
| ASHGA5P048066 | 0.034959566 | 0.118302079 | 2.0187558 | up | noncoding |
| ASHGA5P048066 | 0.034959566 | 0.118302079 | 2.0187558 | up | noncoding |
| ASHGA5P054139 | 0.016170767 | 0.077740057 | 2.009129  | up | noncoding |
| ASHGA5P023469 | 0.00145462  | 0.025519097 | 2.8726983 | up | noncoding |
| ASHGA5P022759 | 0.001567153 | 0.02659241  | 4.199494  | up | noncoding |
| ASHGA5P046564 | 0.003044364 | 0.03574339  | 4.3678983 | up | noncoding |
| ASHGA5P038419 | 0.004102356 | 0.040926621 | 5.0955087 | up | noncoding |
| ASHGA5P021955 | 0.003805208 | 0.039493479 | 2.5972844 | up | noncoding |
| ASHGA5P021955 | 0.003805208 | 0.039493479 | 2.5972844 | up | noncoding |
| ASHGA5P029459 | 0.03570412  | 0.119652008 | 2.2164791 | up | noncoding |
| ASHGA5P029459 | 0.03570412  | 0.119652008 | 2.2164791 | up | noncoding |
| ASHGA5P029459 | 0.03570412  | 0.119652008 | 2.2164791 | up | noncoding |
| ASHGA5P025926 | 0.007127347 | 0.053290385 | 2.5206135 | up | noncoding |
| ASHGA5P025926 | 0.007127347 | 0.053290385 | 2.5206135 | up | noncoding |
| ASHGA5P000062 | 0.00251199  | 0.032544932 | 2.6272492 | up | noncoding |
| ASHGA5P018969 | 0.024808312 | 0.097770279 | 3.0249263 | up | noncoding |
| ASHGA5P018969 | 0.024808312 | 0.097770279 | 3.0249263 | up | noncoding |
| ASHGA5P018969 | 0.024808312 | 0.097770279 | 3.0249263 | up | noncoding |
| ASHGA5P018969 | 0.024808312 | 0.097770279 | 3.0249263 | up | noncoding |
| ASHGA5P018969 | 0.024808312 | 0.097770279 | 3.0249263 | up | noncoding |
| ASHGA5P018969 | 0.024808312 | 0.097770279 | 3.0249263 | up | noncoding |
| ASHGA5P018969 | 0.024808312 | 0.097770279 | 3.0249263 | up | noncoding |
| ASHGA5P018969 | 0.024808312 | 0.097770279 | 3.0249263 | up | noncoding |
| ASHGA5P018969 | 0.024808312 | 0.097770279 | 3.0249263 | up | noncoding |
| ASHGA5P018969 | 0.024808312 | 0.097770279 | 3.0249263 | up | noncoding |
| ASHGA5P030066 | 0.026066529 | 0.100598785 | 2.8944209 | up | noncoding |
| ASHGA5P050681 | 0.030833452 | 0.110301777 | 3.5301728 | up | noncoding |
| ASHGA5P023235 | 0.004229569 | 0.04130748  | 2.1081891 | up | noncoding |
| ASHGA5P031379 | 0.01592209  | 0.077147596 | 3.8693967 | up | noncoding |
| ASHGA5P031078 | 0.029618265 | 0.107770137 | 3.9005455 | up | noncoding |
| ASHGA5P037297 | 0.002019053 | 0.029606317 | 4.017933  | up | noncoding |
| ASHGA5P053474 | 0.011740245 | 0.066707739 | 3.9089815 | up | noncoding |
| ASHGA5P027285 | 0.041193939 | 0.129607517 | 2.802375  | up | noncoding |
| ASHGA5P029243 | 0.002579848 | 0.032855824 | 2.0079173 | up | noncoding |
| ASHGA5P054526 | 0.000525905 | 0.015826428 | 2.1034483 | up | noncoding |
| ASHGA5P044075 | 0.037439047 | 0.122766907 | 2.0669376 | up | noncoding |
| ASHGA5P054404 | 0.004357079 | 0.041854505 | 2.035865  | up | noncoding |
| ASHGA5P031047 | 0.000396697 | 0.014216192 | 3.4052334 | up | noncoding |
| ASHGA5P031047 | 0.000396697 | 0.014216192 | 3.4052334 | up | noncoding |
| ASHGA5P021447 | 0.010277075 | 0.062647807 | 3.2131948 | up | noncoding |
| ASHGA5P018116 | 9.90834E-05 | 0.009080764 | 2.514708  | up | noncoding |
| ASHGA5P037062 | 0.004388664 | 0.041991917 | 2.1547889 | up | noncoding |
| ASHGA5P023010 | 0.001467631 | 0.025593099 | 2.3856369 | up | noncoding |
| ASHGA5P040796 | 0.003274786 | 0.036994062 | 2.6335498 | up | noncoding |
| ASHGA5P041570 | 0.01732642  | 0.080081956 | 2.8256161 | up | noncoding |
| ASHGA5P014167 | 0.023370236 | 0.094712107 | 2.0112535 | up | noncoding |
| ASHGA5P053820 | 0.008978393 | 0.059181641 | 3.4436344 | up | noncoding |
| ASHGA5P053820 | 0.008978393 | 0.059181641 | 3.4436344 | up | noncoding |
| ASHGA5P052517 | 0.021783837 | 0.091164516 | 4.7145691 | up | noncoding |
| ASHGA5P029211 | 0.014825133 | 0.074487146 | 2.3607025 | up | noncoding |
| ASHGA5P029097 | 0.004126121 | 0.041046245 | 3.8116125 | up | noncoding |
| ASHGA5P036778 | 0.00043846  | 0.014679519 | 3.2833108 | up | noncoding |
| ASHGA5P021811 | 0.000603925 | 0.016566293 | 4.364568  | up | noncoding |
| ASHGA5P031856 | 0.002265129 | 0.031214119 | 2.4708826 | up | noncoding |
| ASHGA5P046097 | 0.021593674 | 0.090652411 | 3.0041508 | up | noncoding |

|                 |               |                     |      |       |   |
|-----------------|---------------|---------------------|------|-------|---|
| NR_046986       | KIRREL3-AS2   | RefSeq              | 500  | chr11 | + |
| ENST00000433843 | SNHG5         | GENCODE             | 388  | chr6  | - |
| NR_036658       | ZNFX1-AS1     | RefSeq              | 959  | chr20 | + |
| ENST00000442010 | HMGB3P22      | GENCODE             | 597  | chr5  | + |
| BC042589        |               | RNAdb               | 3223 | chr6  | + |
| ENST00000449500 | CTD-3184A7.4  | GENCODE             | 801  | chr20 | + |
| ENST00000532022 | RP11-390K5.3  | GENCODE             | 332  | chr11 | - |
| ENST00000532022 | RP11-390K5.3  | GENCODE             | 332  | chr11 | - |
| ENST00000532022 | RP11-390K5.3  | GENCODE             | 332  | chr11 | - |
| ENST00000532022 | RP11-390K5.3  | GENCODE             | 332  | chr11 | - |
| ENST00000438602 | RP11-308D16.4 | GENCODE             | 582  | chrX  | + |
| NR_034100       | LOC400643     | RefSeq              | 1751 | chr18 | - |
| ENST00000562298 | RP11-368I7.2  | GENCODE             | 931  | chr16 | + |
| ENST00000561542 | RP11-305E6.4  | GENCODE             | 3241 | chr10 | - |
| ENST00000509201 | RP11-93K22.6  | GENCODE             | 466  | chr3  | - |
| ENST00000545424 | RP11-695J4.2  | GENCODE             | 475  | chr12 | + |
| ENST00000545424 | RP11-695J4.2  | GENCODE             | 475  | chr12 | + |
| ENST00000555294 | RP11-298I3.4  | GENCODE             | 589  | chr14 | + |
| ENST00000555294 | RP11-298I3.4  | GENCODE             | 589  | chr14 | + |
| ENST00000555294 | RP11-298I3.4  | GENCODE             | 589  | chr14 | + |
| NR_046402       | POLD1         | RefSeq              | 3361 | chr19 | + |
| NR_046402       | POLD1         | RefSeq              | 3361 | chr19 | + |
| AK124533        |               | NRED                | 4378 | chr9  | - |
| NR_033746       | DMKN          | RefSeq              | 1054 | chr19 | - |
| NR_033746       | DMKN          | RefSeq              | 1054 | chr19 | - |
| NR_033746       | DMKN          | RefSeq              | 1054 | chr19 | - |
| NR_033746       | DMKN          | RefSeq              | 1054 | chr19 | - |
| NR_033746       | DMKN          | RefSeq              | 1054 | chr19 | - |
| NR_033746       | DMKN          | RefSeq              | 1054 | chr19 | - |
| NR_033746       | DMKN          | RefSeq              | 1054 | chr19 | - |
| NR_033746       | DMKN          | RefSeq              | 1054 | chr19 | - |
| NR_033746       | DMKN          | RefSeq              | 1054 | chr19 | - |
| NR_033746       | DMKN          | RefSeq              | 1054 | chr19 | - |
| TCONS_00008011  | XLOC_003475   | LincRNAs identified | 413  | chr4  | + |
| uc002tyw.3      | BC032407      | UCSC_knowngene      | 1746 | chr2  | - |
| ENST00000575202 | CTD-2377D24.8 | GENCODE             | 618  | chr17 | + |
| ENST00000563280 | RP11-463O9.5  | GENCODE             | 319  | chr16 | - |
| ENST00000457405 | RP1-10C16.1   | GENCODE             | 418  | chr1  | - |
| ENST00000457669 | AP000696.2    | GENCODE             | 1133 | chr21 | - |
| ENST00000518880 | RP11-363E6.3  | GENCODE             | 620  | chr8  | - |
| TCONS_00011758  | XLOC_005220   | LincRNAs identified | 319  | chr6  | + |
| ENST00000556072 | RP11-488C13.5 | GENCODE             | 1677 | chr14 | - |
| uc001kfm.3      | BC069782      | UCSC_knowngene      | 1227 | chr10 | + |
| NR_026817       | LOC148696     | RefSeq              | 4241 | chr1  | + |
| TCONS_00010945  | XLOC_004859   | LincRNAs identified | 387  | chr5  | - |
| ENST00000567108 | CTD-3203P2.1  | GENCODE             | 1684 | chr16 | - |
| ENST00000567108 | CTD-3203P2.1  | GENCODE             | 1684 | chr16 | - |
| ENST00000534477 | CTC-497E21.4  | GENCODE             | 888  | chr11 | - |
| ENST00000449614 | AC005077.5    | pseudogene          | 213  | chr7  | + |
| NR_034009       | SRSF6         | RefSeq              | 4023 | chr20 | + |
| ENST00000567665 | RP11-345M22.1 | GENCODE             | 416  | chr16 | + |
| ENST00000414422 | RP11-277L2.2  | GENCODE             | 769  | chr1  | + |
| TCONS_00020532  | XLOC_009846   | LincRNAs identified | 614  | chr12 | + |
| ENST00000434828 | FER1L4        | GENCODE             | 1964 | chr20 | - |
| uc004bos.3      | AB074162      | UCSC_knowngene      | 2239 | chr9  | + |
| uc004bos.3      | AB074162      | UCSC_knowngene      | 2239 | chr9  | + |
| ENST00000510155 | RP11-844P9.2  | GENCODE             | 544  | chr5  | - |
| ENST00000554634 | RP1-261D10.2  | GENCODE             | 464  | chr14 | - |
| ENST00000556537 | RP11-407N17.4 | GENCODE             | 530  | chr14 | - |
| ENST00000439232 | SNORA71B      | GENCODE             | 136  | chr20 | - |
| ENST00000541383 | RP11-173P15.3 | GENCODE             | 575  | chr12 | - |
| TCONS_00006568  | XLOC_003195   | LincRNAs identified | 243  | chr3  | - |
| ENST00000424415 | RP11-706O15.5 | GENCODE             | 2194 | chrX  | - |

|           |           |                  |                                        |                      |
|-----------|-----------|------------------|----------------------------------------|----------------------|
| 126810641 | 126814986 |                  | GCCTTGTCCTAC 100874251                 | intronic antisense   |
| 86387046  | 86387917  | ENST00000431043  | AAGTTGCAACGATTTCTGTAAGTGG              | intergenic           |
| 47894714  | 47905795  | NR_036659        | TATAAAATTGAA, 441951                   | natural antisense    |
| 179106032 | 179121650 |                  | AAGAGTCCGGAATTTTCCAAGAAGT              | natural antisense    |
| 26172304  | 26175512  |                  | GCAGCATTTGGGTGGAAGGACGTAC              | intergenic           |
| 62258579  | 62260177  |                  | GTGTCATTTATCTGAGTTTGCCTATC             | bidirectional        |
| 47144654  | 47152352  |                  | TTGGAAGCTTTTACAATAAAGATTT,             | intronic antisense   |
| 47144654  | 47152352  |                  | TTGGAAGCTTTTACAATAAAGATTT,             | intronic antisense   |
| 47144654  | 47152352  |                  | TTGGAAGCTTTTACAATAAAGATTT,             | intronic antisense   |
| 47144654  | 47152352  |                  | TTGGAAGCTTTTACAATAAAGATTT,             | intronic antisense   |
| 136075645 | 136103789 |                  | CCCCTAATTACATAATTTTAAGCAT,             | intergenic           |
| 6925472   | 6929868   |                  | CGAGGCTAAGGA 400643                    | intergenic           |
| 89782935  | 89784572  |                  | TTTTCCCTGCAAGCCATGGGCCTCTC             | natural antisense    |
| 30591754  | 30594995  |                  | CAGAACACTCTGATTTGGTTACATG,             | intergenic           |
| 129672947 | 129688137 |                  | CAATTAGAGGATTTGCTAGTACGTA              | intergenic           |
| 14720683  | 14772232  |                  | CCTCTCCGAGTTTTCGCGCCCAAGG,             | natural antisense    |
| 14720683  | 14772232  |                  | CCTCTCCGAGTTTTCGCGCCCAAGG,             | natural antisense    |
| 23452106  | 23467632  |                  | CCTGAAGGAAAAGGAAACGTGGTAC              | intronic antisense   |
| 23452106  | 23467632  |                  | CCTGAAGGAAAAGGAAACGTGGTAC              | intronic antisense   |
| 23452106  | 23467632  |                  | CCTGAAGGAAAAGGAAACGTGGTAC              | intronic antisense   |
| 50887579  | 50921275  |                  | TGGCCGAGAGGA 5424                      | exon sense-overlappi |
| 50887579  | 50921275  |                  | TGGCCGAGAGGA 5424                      | exon sense-overlappi |
| 32954488  | 32958868  |                  | GTCAAGTTACTTGCTCACAATCATA,             | intergenic           |
| 35988118  | 36001412  |                  | GCTGCAGTGGGT(93099                     | exon sense-overlappi |
| 35988118  | 36001412  |                  | GCTGCAGTGGGT(93099                     | exon sense-overlappi |
| 35988118  | 36001412  |                  | GCTGCAGTGGGT(93099                     | exon sense-overlappi |
| 35988118  | 36001412  |                  | GCTGCAGTGGGT(93099                     | exon sense-overlappi |
| 35988118  | 36001412  |                  | GCTGCAGTGGGT(93099                     | exon sense-overlappi |
| 35988118  | 36001412  |                  | GCTGCAGTGGGT(93099                     | exon sense-overlappi |
| 35988118  | 36001412  |                  | GCTGCAGTGGGT(93099                     | exon sense-overlappi |
| 35988118  | 36001412  |                  | GCTGCAGTGGGT(93099                     | exon sense-overlappi |
| 35988118  | 36001412  |                  | GCTGCAGTGGGT(93099                     | exon sense-overlappi |
| 24667010  | 24670951  |                  | TTAAACATGTCAACATCTCAACAAT,             | intergenic           |
| 156877046 | 157111432 | ENST00000428651  | CTTGTTTCAGGTAATGTAACCAGAT,             | intergenic           |
| 46760728  | 46781844  |                  | TTCTCTACAGGTATTGACTGCTGCC,             | intergenic           |
| 86598750  | 86601367  |                  | ACTAGAAGGCAATGGGGCGTGCCAC              | natural antisense    |
| 168732602 | 168743728 |                  | CATTCATTACCATTGATGTATTTGI              | intergenic           |
| 38004978  | 38009331  |                  | ATGGGTTTATCTTTTGGGACCAAGA,             | intergenic           |
| 82192105  | 82193681  |                  | CGGGAAGTGTGGTTTCTAAACTAAA              | intronic antisense   |
| 27677988  | 27680876  |                  | TCCAATGTTCTTGTTCAGTGCACCTI             | intergenic           |
| 77248082  | 77253067  |                  | CCCAGGAGGGGAGGAGGGGTTGCT,              | natural antisense    |
| 90667927  | 90669154  |                  | TATTATGAAGGTATTGTGGGTTTTCT             | exon sense-overlappi |
| 207991723 | 207995941 |                  | ATACCCATCTCCC 148696                   | natural antisense    |
| 67804064  | 67814933  |                  | ATGTTGGCTTCATCCTCATGCCGGT,             | intergenic           |
| 27224630  | 27226314  |                  | AGACAACGTTTGTATTATTACTGC,              | natural antisense    |
| 27224630  | 27226314  |                  | AGACAACGTTTGTATTATTACTGC,              | natural antisense    |
| 13001757  | 13011086  | ENST00000532541  | AGCAGCATGCCAAAATTGGAAGAAC              | intergenic           |
| 75803050  | 75804891  | ENST00000437494  | CATCATTCAAGTCACTGTGATGCCTTGCCAACCTCTG, |                      |
| 42086503  | 42092244  |                  | AATCTGAAGTAG(6431                      | exon sense-overlappi |
| 79832430  | 79832987  |                  | TGAGAATCAAACAAAACCACGGTCA              | intergenic           |
| 149605639 | 149633208 | ENST00000418974, | ACGGGGATCCAGAAGGCGTTGTTCGC             | intergenic           |
| 96506540  | 96545912  |                  | TTTTATTTCACTCTCAAGTAATGGCT             | intergenic           |
| 34146506  | 34152457  | ENST00000400465, | ATCTCTGCCAATC(80307                    | intergenic           |
| 127420690 | 127422929 |                  | CTTACGTAACAGTTCAGGACTACTT,             | intronic antisense   |
| 127420690 | 127422929 |                  | CTTACGTAACAGTTCAGGACTACTT,             | intronic antisense   |
| 175600355 | 175602396 |                  | TCTTCCTCCCAGATACCAACAAGCC,             | intergenic           |
| 71773886  | 71778076  |                  | GAGACTGAAATGGAAGTCTCTTAGT              | intergenic           |
| 39644088  | 39645084  |                  | CTAGGCCTTTTAACCTATGATGTAA,             | natural antisense    |
| 37053842  | 37053978  |                  | CGCTTCCCCGTG126776                     | intergenic           |
| 121134926 | 121137304 |                  | TCTCCATACATTCCCTATGGTGGT,              | natural antisense    |
| 104536325 | 104626299 |                  | ATCTTTGGAGATTGGAGAGTCCACC              | intergenic           |
| 3809478   | 3820041   |                  | CTCAGTACATCTTAATAAGGAATTA,             | intergenic           |

|                        |          |                         |           |           |
|------------------------|----------|-------------------------|-----------|-----------|
| NM_032531              | KIRREL3  | kin of IRRE-like prot-  | 126293395 | 126870766 |
| NM_021035              | ZNFX1    | NFX1-type zinc fingi-   | 47862438  | 47894756  |
| NM_001164444           | CBY3     | protein chibby homo-    | 179105558 | 179107975 |
| NM_012384              | GMEB2    | glucocorticoid modu-    | 62218954  | 62258381  |
| NM_001003676           | C11orf49 | UPF0705 protein C1 +    | 46958250  | 47183798  |
| NM_001003677           | C11orf49 | UPF0705 protein C1 +    | 46958250  | 47183798  |
| NM_001003678           | C11orf49 | UPF0705 protein C1 +    | 46958250  | 47185931  |
| NM_024113              | C11orf49 | UPF0705 protein C1 +    | 46958250  | 47183798  |
| NM_004913              | C16orf7  | uncharacterized prote-  | 89773540  | 89787394  |
| NM_004963              | GUCY2C   | heat-stable enterotox - | 14765567  | 14849519  |
| NM_024829              | PLBD1    | phospholipase B-like -  | 14656596  | 14720791  |
| NM_001130706           | C14orf93 | uncharacterized prote-  | 23456109  | 23479360  |
| NM_001130708           | C14orf93 | uncharacterized prote-  | 23456109  | 23479360  |
| NM_021944              | C14orf93 | uncharacterized prote-  | 23456109  | 23479360  |
| NM_001256849           | POLD1    | DNA polymerase del+     | 50887579  | 50921275  |
| NM_002691              | POLD1    | DNA polymerase del+     | 50887579  | 50921275  |
| NM_001035516           | DMKN     | dermokine isoform 1 -   | 35988118  | 35992813  |
| NM_001126056           | DMKN     | dermokine isoform 3 -   | 35988118  | 36004560  |
| NM_001126057           | DMKN     | dermokine isoform 5 -   | 35994205  | 36004560  |
| NM_001126058           | DMKN     | dermokine isoform 4 -   | 35994205  | 36004560  |
| NM_001126059           | DMKN     | dermokine isoform 6 -   | 35988118  | 36001391  |
| NM_001190347           | DMKN     | dermokine isoform 8 -   | 35988118  | 36004560  |
| NM_001190348           | DMKN     | dermokine isoform 9 -   | 35994205  | 36004560  |
| NM_001190349           | DMKN     | dermokine isoform 1-    | 35994205  | 36004560  |
| NM_033317              | DMKN     | dermokine isoform 2 -   | 35988118  | 36004560  |
| NM_005251              | FOXC2    | forkhead box protein +  | 86600856  | 86602537  |
| NM_001444              | FABP5    | fatty acid-binding pr+  | 82192717  | 82197012  |
| NM_014909              | VASH1    | vasohibin-1 +           | 77228234  | 77249363  |
| NM_020799              | STAMBPL1 | AMSH-like protease +    | 90639943  | 90683259  |
| ENST00000415882        | C1orf132 | chromosome 1 open :-    | 207990581 | 208042495 |
| NM_001145348           | KDM8     | lysine-specific demet+  | 27215295  | 27233089  |
| NM_024773              | KDM8     | lysine-specific demet+  | 27214806  | 27233089  |
| AGGAAATGACAGACTCAATGCC |          |                         |           |           |
| NM_006275              | SRSF6    | serine/arginine-rich s+ | 42086503  | 42092244  |
| NM_001489              | NR6A1    | nuclear receptor subf - | 127284702 | 127533576 |
| NM_033334              | NR6A1    | nuclear receptor subf - | 127284702 | 127533576 |
| NM_002687              | PNN      | pinin +                 | 39644386  | 39652422  |
| NM_014730              | MLEC     | malectin precursor +    | 121124948 | 121139667 |

|             |             |           |           |            |            |
|-------------|-------------|-----------|-----------|------------|------------|
| 986.085578  | 245.662301  | 9.345168  | 8.13798   | 1042.53    | 1134.4802  |
| 2558.055917 | 625.85145   | 10.894719 | 9.668858  | 2730.5415  | 2982.3787  |
| 23852.69983 | 5038.554233 | 14.065494 | 12.707996 | 27743.605  | 38039.332  |
| 975.485882  | 222.636472  | 9.393129  | 8.01689   | 1424.8195  | 1123.4471  |
| 306.520983  | 116.422056  | 7.752838  | 6.687791  | 246.3304   | 112.5434   |
| 1815.555128 | 477.956663  | 10.326049 | 9.257129  | 2057.2632  | 1890.1562  |
| 28.069366   | 8.019058    | 4.133706  | 3.120239  | 39.4618    | 68.380035  |
| 28.069366   | 8.019058    | 4.133706  | 3.120239  | 39.4618    | 68.380035  |
| 28.069366   | 8.019058    | 4.133706  | 3.120239  | 39.4618    | 68.380035  |
| 28.069366   | 8.019058    | 4.133706  | 3.120239  | 39.4618    | 68.380035  |
| 215.220152  | 56.514217   | 7.097979  | 6.091408  | 117.879875 | 83.259735  |
| 101.580003  | 21.733392   | 6.158838  | 4.636431  | 127.561485 | 117.81549  |
| 53.020394   | 7.907083    | 5.234155  | 3.16394   | 71.39202   | 100.331184 |
| 345.164403  | 51.260843   | 7.961076  | 5.834137  | 266.11646  | 154.82495  |
| 102.881242  | 15.184208   | 6.318066  | 3.96884   | 85.444084  | 89.09856   |
| 40.19943    | 12.543235   | 4.965964  | 3.58896   | 43.00435   | 30.261692  |
| 40.19943    | 12.543235   | 4.965964  | 3.58896   | 43.00435   | 30.261692  |
| 131.617312  | 30.064929   | 6.260329  | 5.112059  | 131.0398   | 223.35098  |
| 131.617312  | 30.064929   | 6.260329  | 5.112059  | 131.0398   | 223.35098  |
| 131.617312  | 30.064929   | 6.260329  | 5.112059  | 131.0398   | 223.35098  |
| 235.332203  | 58.299868   | 7.44407   | 6.110295  | 270.28287  | 384.64868  |
| 235.332203  | 58.299868   | 7.44407   | 6.110295  | 270.28287  | 384.64868  |
| 49.735129   | 12.263361   | 5.268043  | 3.87449   | 55.296707  | 51.15861   |
| 658.708072  | 80.220791   | 7.838148  | 6.241248  | 94.33742   | 48.566     |
| 658.708072  | 80.220791   | 7.838148  | 6.241248  | 94.33742   | 48.566     |
| 658.708072  | 80.220791   | 7.838148  | 6.241248  | 94.33742   | 48.566     |
| 658.708072  | 80.220791   | 7.838148  | 6.241248  | 94.33742   | 48.566     |
| 658.708072  | 80.220791   | 7.838148  | 6.241248  | 94.33742   | 48.566     |
| 658.708072  | 80.220791   | 7.838148  | 6.241248  | 94.33742   | 48.566     |
| 658.708072  | 80.220791   | 7.838148  | 6.241248  | 94.33742   | 48.566     |
| 658.708072  | 80.220791   | 7.838148  | 6.241248  | 94.33742   | 48.566     |
| 658.708072  | 80.220791   | 7.838148  | 6.241248  | 94.33742   | 48.566     |
| 658.708072  | 80.220791   | 7.838148  | 6.241248  | 94.33742   | 48.566     |
| 658.708072  | 80.220791   | 7.838148  | 6.241248  | 94.33742   | 48.566     |
| 56.23083    | 11.966345   | 5.165914  | 3.63264   | 84.0701    | 65.45948   |
| 79.269913   | 10.877438   | 5.324532  | 3.504793  | 146.89969  | 129.50049  |
| 112.841412  | 35.560279   | 6.465492  | 5.389488  | 132.6253   | 111.5879   |
| 197.582672  | 20.772113   | 6.243329  | 4.29122   | 383.52927  | 576.2493   |
| 540.44021   | 62.563541   | 8.141171  | 6.177495  | 739.8548   | 800.8052   |
| 83.172722   | 13.023733   | 5.897817  | 3.891364  | 64.94563   | 59.72509   |
| 572.517225  | 89.159235   | 8.62505   | 6.658257  | 492.44672  | 465.2801   |
| 121.71997   | 29.430102   | 6.402319  | 4.915669  | 95.20561   | 132.64342  |
| 8855.634067 | 2355.413967 | 12.617501 | 11.611801 | 9936.424   | 11273.55   |
| 107.905316  | 35.829039   | 6.362311  | 5.289555  | 102.03078  | 81.335205  |
| 2037.376967 | 723.919182  | 10.528661 | 9.481167  | 2726.6743  | 2363.6418  |
| 18.178234   | 7.040994    | 3.854086  | 2.828444  | 25.069014  | 13.154799  |
| 349.162835  | 69.019241   | 8.04156   | 6.273806  | 292.99838  | 237.08041  |
| 349.162835  | 69.019241   | 8.04156   | 6.273806  | 292.99838  | 237.08041  |
| 37.137832   | 8.761411    | 4.829609  | 3.1456    | 54.686607  | 44.13648   |
| 45.228217   | 11.849331   | 5.149319  | 3.818929  | 48.978367  | 36.662575  |
| 472.348412  | 135.605502  | 8.451084  | 7.343537  | 486.49686  | 464.8079   |
| 118.39563   | 29.208653   | 6.399369  | 5.144995  | 151.46591  | 150.76512  |
| 32.594548   | 8.388413    | 4.670682  | 3.273673  | 29.79771   | 21.464613  |
| 82.521485   | 16.45759    | 5.80618   | 4.307615  | 73.668365  | 42.568703  |
| 81.761967   | 22.525429   | 5.776509  | 4.768414  | 64.784515  | 21.905218  |
| 122.173125  | 20.344358   | 6.364508  | 4.580576  | 132.80942  | 242.53362  |
| 122.173125  | 20.344358   | 6.364508  | 4.580576  | 132.80942  | 242.53362  |
| 47799.00033 | 9926.752633 | 14.945834 | 12.708708 | 52791.91   | 68116.625  |
| 122.061607  | 30.877328   | 6.445437  | 5.206221  | 163.51358  | 149.65501  |
| 52.080488   | 11.495805   | 5.319484  | 3.389083  | 45.906273  | 59.273453  |
| 1751.140433 | 299.664802  | 10.301133 | 8.585982  | 2328.5806  | 2147.7583  |
| 49.820987   | 8.406751    | 5.279074  | 3.153235  | 64.02232   | 59.129242  |
| 230.585415  | 62.494301   | 7.431128  | 6.126102  | 272.02258  | 325.47226  |
| 2974.829398 | 418.11623   | 10.470387 | 8.88343   | 2312.1667  | 2078.7761  |

|            |           |           |            |           |           |
|------------|-----------|-----------|------------|-----------|-----------|
| 498.95593  | 323.10864 | 1727.0693 | 1190.3694  | 299.50467 | 160.82173 |
| 2370.4734  | 2550.6335 | 1970.0472 | 2744.2612  | 635.36145 | 562.5668  |
| 12578.276  | 26271.248 | 15865.64  | 22618.098  | 4895.868  | 5927.562  |
| 1538.2521  | 423.57    | 664.26324 | 678.56335  | 169.73747 | 150.9996  |
| 334.97726  | 229.25272 | 449.42285 | 466.59927  | 35.635693 | 23.847216 |
| 2287.75    | 2265.7605 | 700.66797 | 1691.7329  | 366.4485  | 344.47787 |
| 14.512231  | 9.540442  | 17.11775  | 19.403936  | 9.76212   | 10.31269  |
| 14.512231  | 9.540442  | 17.11775  | 19.403936  | 9.76212   | 10.31269  |
| 14.512231  | 9.540442  | 17.11775  | 19.403936  | 9.76212   | 10.31269  |
| 14.512231  | 9.540442  | 17.11775  | 19.403936  | 9.76212   | 10.31269  |
| 125.07681  | 312.4039  | 143.51282 | 509.18777  | 40.392063 | 31.27434  |
| 143.05528  | 31.744501 | 108.07917 | 81.22409   | 18.249258 | 26.057463 |
| 28.13813   | 32.597588 | 38.098335 | 47.565105  | 10.464631 | 5.2547693 |
| 370.05997  | 511.85583 | 289.13644 | 478.99277  | 61.17973  | 33.22788  |
| 85.05429   | 104.1619  | 126.1869  | 127.34172  | 15.04287  | 12.825401 |
| 49.571213  | 26.608234 | 44.32206  | 47.42903   | 11.359479 | 4.9999995 |
| 49.571213  | 26.608234 | 44.32206  | 47.42903   | 11.359479 | 4.9999995 |
| 25.767282  | 36.020428 | 204.27048 | 169.2549   | 33.766792 | 39.441757 |
| 25.767282  | 36.020428 | 204.27048 | 169.2549   | 33.766792 | 39.441757 |
| 25.767282  | 36.020428 | 204.27048 | 169.2549   | 33.766792 | 39.441757 |
| 146.50844  | 176.38208 | 207.89055 | 226.2806   | 46.870697 | 29.041555 |
| 146.50844  | 176.38208 | 207.89055 | 226.2806   | 46.870697 | 29.041555 |
| 50.976402  | 60.583485 | 25.405659 | 54.98991   | 11.90801  | 14.519171 |
| 112.629814 | 2014.3718 | 483.4104  | 1198.933   | 35.484898 | 14.69463  |
| 112.629814 | 2014.3718 | 483.4104  | 1198.933   | 35.484898 | 14.69463  |
| 112.629814 | 2014.3718 | 483.4104  | 1198.933   | 35.484898 | 14.69463  |
| 112.629814 | 2014.3718 | 483.4104  | 1198.933   | 35.484898 | 14.69463  |
| 112.629814 | 2014.3718 | 483.4104  | 1198.933   | 35.484898 | 14.69463  |
| 112.629814 | 2014.3718 | 483.4104  | 1198.933   | 35.484898 | 14.69463  |
| 112.629814 | 2014.3718 | 483.4104  | 1198.933   | 35.484898 | 14.69463  |
| 112.629814 | 2014.3718 | 483.4104  | 1198.933   | 35.484898 | 14.69463  |
| 112.629814 | 2014.3718 | 483.4104  | 1198.933   | 35.484898 | 14.69463  |
| 112.629814 | 2014.3718 | 483.4104  | 1198.933   | 35.484898 | 14.69463  |
| 79.61333   | 9.398762  | 54.523506 | 44.319805  | 8.242886  | 8.495557  |
| 130.48831  | 4.9999995 | 32.76704  | 30.963947  | 13.945042 | 5.611807  |
| 94.4154    | 112.11148 | 104.13567 | 122.17272  | 25.557316 | 15.711138 |
| 134.65024  | 33.849995 | 25.376907 | 31.840322  | 28.483822 | 54.604263 |
| 655.9612   | 27.991459 | 566.3016  | 451.727    | 66.42396  | 35.352684 |
| 66.43496   | 167.60161 | 39.46733  | 100.86171  | 10.332039 | 6.522034  |
| 533.16187  | 1053.1881 | 208.94331 | 682.08325  | 81.252525 | 129.17073 |
| 34.89431   | 192.2102  | 106.24571 | 169.12057  | 17.48662  | 7.5453544 |
| 7764.5654  | 11006.138 | 4296.286  | 8856.841   | 2200.5496 | 2182.6794 |
| 129.5288   | 69.53427  | 137.15721 | 127.845634 | 34.59984  | 12.53208  |
| 1699.624   | 1166.7565 | 2141.7654 | 2125.7998  | 838.9857  | 269.73187 |
| 16.093105  | 24.073898 | 14.825129 | 15.853459  | 7.856269  | 4.9999995 |
| 317.58542  | 380.7785  | 368.02542 | 498.50888  | 42.053974 | 25.012312 |
| 317.58542  | 380.7785  | 368.02542 | 498.50888  | 42.053974 | 25.012312 |
| 22.68794   | 45.019047 | 27.35802  | 28.938896  | 8.667067  | 4.9999995 |
| 52.65046   | 58.76161  | 29.44338  | 44.872913  | 9.07682   | 8.701623  |
| 494.8697   | 677.6556  | 255.53775 | 454.72266  | 157.56067 | 86.97143  |
| 133.47832  | 39.00241  | 126.3522  | 109.30982  | 29.610641 | 23.384468 |
| 48.325897  | 28.38169  | 33.912876 | 33.684505  | 7.4549127 | 6.356764  |
| 44.83047   | 42.56264  | 156.68013 | 134.8186   | 17.988304 | 14.932191 |
| 85.28845   | 47.49074  | 145.95387 | 125.14901  | 20.681026 | 13.656351 |
| 34.10172   | 96.42672  | 102.41439 | 124.75288  | 21.86063  | 15.976801 |
| 34.10172   | 96.42672  | 102.41439 | 124.75288  | 21.86063  | 15.976801 |
| 26061.094  | 15175.965 | 65176.508 | 59471.9    | 12677.972 | 2001.5061 |
| 185.78122  | 50.81661  | 87.08084  | 95.522385  | 24.932943 | 20.625626 |
| 28.268513  | 65.17436  | 51.116272 | 62.744057  | 5.4826345 | 4.9999995 |
| 2261.3508  | 1453.0748 | 915.2701  | 1400.808   | 296.75708 | 218.31334 |
| 50.597664  | 39.32463  | 37.650913 | 48.201153  | 8.066454  | 4.9999995 |
| 179.55289  | 136.40372 | 247.43558 | 222.62546  | 81.66079  | 44.05952  |
| 2164.388   | 145.39949 | 6168.4834 | 4979.7627  | 367.25748 | 292.2382  |

|            |            |           |            |           |           |
|------------|------------|-----------|------------|-----------|-----------|
| 422.1397   | 122.961136 | 334.55637 | 133.9902   | 9.551316  | 9.796671  |
| 745.14435  | 666.25494  | 633.7981  | 511.98306  | 10.926253 | 11.119517 |
| 4050.3113  | 6304.981   | 4375.4937 | 4677.1094  | 14.313887 | 14.860018 |
| 179.8152   | 127.3927   | 466.74054 | 241.13332  | 10.004446 | 9.782856  |
| 57.884815  | 106.56191  | 306.4071  | 168.1956   | 7.4896693 | 6.595354  |
| 458.30408  | 627.36176  | 591.28284 | 479.86493  | 10.528252 | 10.471233 |
| 12.26024   | 5.7793     | 4.9999995 | 4.9999995  | 4.8407536 | 5.921891  |
| 12.26024   | 5.7793     | 4.9999995 | 4.9999995  | 4.8407536 | 5.921891  |
| 12.26024   | 5.7793     | 4.9999995 | 4.9999995  | 4.8407536 | 5.921891  |
| 12.26024   | 5.7793     | 4.9999995 | 4.9999995  | 4.8407536 | 5.921891  |
| 55.121746  | 77.69056   | 79.6368   | 54.969795  | 6.430396  | 6.183736  |
| 21.791182  | 8.383744   | 31.333408 | 24.585295  | 6.5457187 | 6.6573205 |
| 6.019308   | 9.332702   | 11.371091 | 4.9999995  | 5.697596  | 6.4337006 |
| 104.472595 | 30.968912  | 48.95867  | 28.757269  | 7.5985193 | 7.0377994 |
| 30.629889  | 17.830671  | 4.9999995 | 9.77642    | 5.9633613 | 6.272367  |
| 20.527338  | 5.606031   | 23.09368  | 9.67288    | 4.9670706 | 4.853403  |
| 20.527338  | 5.606031   | 23.09368  | 9.67288    | 4.9670706 | 4.853403  |
| 26.617893  | 17.328949  | 46.313793 | 16.92039   | 6.586653  | 7.546888  |
| 26.617893  | 17.328949  | 46.313793 | 16.92039   | 6.586653  | 7.546888  |
| 26.617893  | 17.328949  | 46.313793 | 16.92039   | 6.586653  | 7.546888  |
| 68.046295  | 55.150906  | 96.05718  | 54.632572  | 7.620288  | 8.294148  |
| 68.046295  | 55.150906  | 96.05718  | 54.632572  | 7.620288  | 8.294148  |
| 16.446484  | 8.573568   | 12.314439 | 9.818494   | 5.323045  | 5.5427933 |
| 44.07205   | 87.5648    | 175.2169  | 124.291466 | 6.1135817 | 5.474477  |
| 44.07205   | 87.5648    | 175.2169  | 124.291466 | 6.1135817 | 5.474477  |
| 44.07205   | 87.5648    | 175.2169  | 124.291466 | 6.1135817 | 5.474477  |
| 44.07205   | 87.5648    | 175.2169  | 124.291466 | 6.1135817 | 5.474477  |
| 44.07205   | 87.5648    | 175.2169  | 124.291466 | 6.1135817 | 5.474477  |
| 44.07205   | 87.5648    | 175.2169  | 124.291466 | 6.1135817 | 5.474477  |
| 44.07205   | 87.5648    | 175.2169  | 124.291466 | 6.1135817 | 5.474477  |
| 44.07205   | 87.5648    | 175.2169  | 124.291466 | 6.1135817 | 5.474477  |
| 44.07205   | 87.5648    | 175.2169  | 124.291466 | 6.1135817 | 5.474477  |
| 44.07205   | 87.5648    | 175.2169  | 124.291466 | 6.1135817 | 5.474477  |
| 6.8917613  | 4.9999995  | 25.895939 | 17.271929  | 5.9416113 | 5.859637  |
| 14.94285   | 5.172073   | 20.368504 | 5.224351   | 6.7440724 | 6.7857003 |
| 38.077488  | 49.73304   | 45.289864 | 38.992825  | 6.6038446 | 6.581672  |
| 6.47347    | 13.398559  | 13.723762 | 7.948802   | 8.123682  | 8.859691  |
| 104.40038  | 39.058723  | 83.964935 | 46.180565  | 9.064061  | 9.314474  |
| 22.290077  | 11.91547   | 14.21414  | 12.86864   | 5.562163  | 5.7370043 |
| 23.320051  | 127.864395 | 82.60539  | 90.74232   | 8.462374  | 8.552278  |
| 38.448246  | 24.625364  | 60.10765  | 28.367378  | 6.1259975 | 6.8184953 |
| 2072.362   | 3108.634   | 2330.3545 | 2237.9043  | 12.792551 | 13.0087   |
| 57.541977  | 22.145449  | 55.8486   | 32.306286  | 6.225027  | 6.151743  |
| 2088.5542  | 368.10547  | 438.05615 | 340.0817   | 10.924857 | 10.77782  |
| 11.845951  | 7.543743   | 4.9999995 | 4.9999995  | 4.1882877 | 3.7578416 |
| 51.201355  | 122.950325 | 92.32084  | 80.57664   | 7.7407985 | 7.626748  |
| 51.201355  | 122.950325 | 92.32084  | 80.57664   | 7.7407985 | 7.626748  |
| 19.288187  | 6.7831235  | 5.8404236 | 6.9896655  | 5.3061304 | 5.3481426 |
| 12.965761  | 17.808426  | 9.724709  | 12.81865   | 5.1535683 | 5.103252  |
| 236.82533  | 102.226524 | 130.93199 | 99.117065  | 8.447027  | 8.55081   |
| 36.581486  | 19.874178  | 37.014523 | 28.786625  | 6.7864685 | 6.9998484 |
| 10.0477495 | 14.795968  | 5.957477  | 5.7176075  | 4.44253   | 4.3878975 |
| 17.202297  | 20.520988  | 18.183619 | 9.918143   | 5.747101  | 5.300892  |
| 23.7032    | 24.306946  | 29.68697  | 23.118078  | 5.558642  | 4.4180727 |
| 30.649494  | 12.429778  | 24.217726 | 16.931719  | 6.6056657 | 7.656527  |
| 30.649494  | 12.429778  | 24.217726 | 16.931719  | 6.6056657 | 7.656527  |
| 35907.297  | 1575.3015  | 5284.4707 | 2113.9685  | 15.287802 | 15.672249 |
| 33.057964  | 23.082308  | 49.60963  | 33.955498  | 6.895493  | 6.9915404 |
| 4.9999995  | 14.33546   | 27.080616 | 12.076121  | 5.0606174 | 5.727311  |
| 383.5252   | 370.22733  | 261.8406  | 267.32526  | 10.710994 | 10.6541   |
| 14.40903   | 6.9154725  | 9.836611  | 6.2129416  | 5.5429316 | 5.724901  |
| 120.264984 | 33.68064   | 60.16227  | 35.137604  | 7.6293216 | 8.065734  |
| 431.13135  | 148.67268  | 874.67834 | 394.71933  | 10.702623 | 10.606144 |

|            |           |           |           |           |            |
|------------|-----------|-----------|-----------|-----------|------------|
| 8.61194    | 8.014741  | 10.459863 | 9.6364765 | 8.493663  | 8.177273   |
| 10.8700485 | 10.980642 | 10.647209 | 10.824647 | 9.601699  | 9.993444   |
| 13.311917  | 14.370472 | 13.676494 | 13.860174 | 12.583225 | 13.4268055 |
| 10.219233  | 8.418165  | 9.10502   | 8.829055  | 7.6525607 | 8.091201   |
| 8.053862   | 7.5356736 | 8.55184   | 8.29063   | 5.3905077 | 5.4100704  |
| 10.818191  | 10.820469 | 9.185588  | 10.132558 | 8.779891  | 9.289892   |
| 3.5339692  | 2.6422672 | 4.0166245 | 3.8467276 | 3.510912  | 4.151476   |
| 3.5339692  | 2.6422672 | 4.0166245 | 3.8467276 | 3.510912  | 4.151476   |
| 3.5339692  | 2.6422672 | 4.0166245 | 3.8467276 | 3.510912  | 4.151476   |
| 3.5339692  | 2.6422672 | 4.0166245 | 3.8467276 | 3.510912  | 4.151476   |
| 6.6452403  | 7.965822  | 6.944784  | 8.417893  | 5.5721846 | 5.8055353  |
| 6.838156   | 4.5430684 | 6.5406857 | 5.8280783 | 4.424577  | 5.5375266  |
| 4.5048423  | 4.5843635 | 5.0983343 | 5.086096  | 3.6147182 | 3.1238182  |
| 8.184247   | 8.681705  | 7.9328475 | 8.331337  | 6.169254  | 5.8916407  |
| 6.0943522  | 6.3524423 | 6.7597075 | 6.466164  | 4.143899  | 4.4783015  |
| 5.315003   | 4.2693567 | 5.309368  | 5.081581  | 3.7364175 | 2.4279919  |
| 5.315003   | 4.2693567 | 5.309368  | 5.081581  | 3.7364175 | 2.4279919  |
| 4.376024   | 4.737487  | 7.4365597 | 6.878362  | 5.306449  | 6.144624   |
| 4.376024   | 4.737487  | 7.4365597 | 6.878362  | 5.306449  | 6.144624   |
| 4.376024   | 4.737487  | 7.4365597 | 6.878362  | 5.306449  | 6.144624   |
| 6.8698378  | 7.140625  | 7.4592423 | 7.2802796 | 5.780302  | 5.699424   |
| 6.8698378  | 7.140625  | 7.4592423 | 7.2802796 | 5.780302  | 5.699424   |
| 5.355456   | 5.5437784 | 4.553592  | 5.2895956 | 3.8028843 | 4.670077   |
| 6.495697   | 10.642509 | 8.656863  | 9.645759  | 5.3832984 | 4.687362   |
| 6.495697   | 10.642509 | 8.656863  | 9.645759  | 5.3832984 | 4.687362   |
| 6.495697   | 10.642509 | 8.656863  | 9.645759  | 5.3832984 | 4.687362   |
| 6.495697   | 10.642509 | 8.656863  | 9.645759  | 5.3832984 | 4.687362   |
| 6.495697   | 10.642509 | 8.656863  | 9.645759  | 5.3832984 | 4.687362   |
| 6.495697   | 10.642509 | 8.656863  | 9.645759  | 5.3832984 | 4.687362   |
| 6.495697   | 10.642509 | 8.656863  | 9.645759  | 5.3832984 | 4.687362   |
| 6.495697   | 10.642509 | 8.656863  | 9.645759  | 5.3832984 | 4.687362   |
| 6.495697   | 10.642509 | 8.656863  | 9.645759  | 5.3832984 | 4.687362   |
| 6.495697   | 10.642509 | 8.656863  | 9.645759  | 5.3832984 | 4.687362   |
| 5.99955    | 2.6198082 | 5.5865307 | 4.9883494 | 3.2479994 | 3.8580766  |
| 6.705492   | 2.3221264 | 4.8911276 | 4.4986725 | 4.0276976 | 3.224631   |
| 6.238665   | 6.466601  | 6.4881744 | 6.4139967 | 4.9204407 | 4.7917657  |
| 6.747841   | 4.640364  | 4.551584  | 4.536811  | 5.0666924 | 6.621921   |
| 8.992563   | 4.3415647 | 8.885673  | 8.248692  | 6.288945  | 5.9847794  |
| 5.746375   | 7.061634  | 5.1430926 | 6.136636  | 3.5961955 | 3.4625905  |
| 8.705203   | 9.725263  | 7.4661613 | 8.839019  | 6.568569  | 7.862587   |
| 4.8101873  | 7.266332  | 6.5156918 | 6.8772097 | 4.3659554 | 3.6758711  |
| 12.546705  | 13.0815   | 11.769413 | 12.506136 | 11.426614 | 11.982133  |
| 6.6954885  | 5.75281   | 6.876506  | 6.472292  | 5.3447123 | 4.44536    |
| 10.362165  | 9.87117   | 10.776549 | 10.459407 | 10.023644 | 8.942398   |
| 3.690878   | 4.1038914 | 3.8186889 | 3.5649295 | 3.169776  | 2.4279919  |
| 7.9755254  | 8.250004  | 8.270824  | 8.38546   | 5.626088  | 5.4751754  |
| 7.9755254  | 8.250004  | 8.270824  | 8.38546   | 5.626088  | 5.4751754  |
| 4.1926     | 5.084915  | 4.646643  | 4.3992205 | 3.3250613 | 2.4279919  |
| 5.399629   | 5.4965315 | 4.7389097 | 5.004026  | 3.3960164 | 3.8959959  |
| 8.600178   | 9.09678   | 7.755804  | 8.255904  | 7.542578  | 7.2939515  |
| 6.7345743  | 4.863475  | 6.7611275 | 6.2507205 | 5.1188383 | 5.376331   |
| 5.2783346  | 4.3641796 | 4.9349747 | 4.6161747 | 3.0909386 | 3.4198887  |
| 5.1676702  | 4.9990125 | 7.072974  | 6.549432  | 4.4064465 | 4.711655   |
| 6.0981045  | 5.1697507 | 6.9697366 | 6.4447474 | 4.6084595 | 4.5739746  |
| 4.777419   | 6.2418895 | 6.464509  | 6.441036  | 4.686498  | 4.817898   |
| 4.777419   | 6.2418895 | 6.464509  | 6.441036  | 4.686498  | 4.817898   |
| 14.397183  | 13.531816 | 15.557471 | 15.228483 | 13.882639 | 11.8518305 |
| 7.2163563  | 5.274757  | 6.2366867 | 6.0577903 | 4.8829436 | 5.1986766  |
| 4.5116596  | 5.6535916 | 5.4985404 | 5.465186  | 2.657188  | 2.4279919  |
| 10.801527  | 10.18626  | 9.589073  | 9.864846  | 8.478647  | 8.625574   |
| 5.345134   | 4.8751407 | 5.083185  | 5.1031523 | 3.2137773 | 2.4279919  |
| 7.1586914  | 6.7629538 | 7.7086353 | 7.261433  | 6.5755105 | 6.30748    |
| 10.729852  | 6.856805  | 12.271666 | 11.655234 | 8.78267   | 9.0532875  |



|           |           |           |            |
|-----------|-----------|-----------|------------|
| 8.675404  | 7.3042655 | 8.619994  | 7.5572824  |
| 9.483771  | 9.846637  | 9.536282  | 9.551316   |
| 11.961581 | 13.098996 | 12.388632 | 12.7887335 |
| 7.442043  | 7.360831  | 9.105436  | 8.4492655  |
| 5.8434753 | 7.0837464 | 8.502987  | 7.895961   |
| 8.801858  | 9.764435  | 9.443367  | 9.463334   |
| 3.7017384 | 2.6427412 | 2.3618152 | 2.352752   |
| 3.7017384 | 2.6427412 | 2.3618152 | 2.352752   |
| 3.7017384 | 2.6427412 | 2.3618152 | 2.352752   |
| 3.7017384 | 2.6427412 | 2.3618152 | 2.352752   |
| 5.776781  | 6.6042094 | 6.5738    | 6.21594    |
| 4.479794  | 3.1575496 | 5.244028  | 4.9751134  |
| 2.7912567 | 3.3200235 | 3.781071  | 2.352752   |
| 6.670253  | 5.1633906 | 5.8860703 | 5.224211   |
| 4.9512362 | 4.3008986 | 2.3618152 | 3.5768867  |
| 4.4002595 | 2.6052425 | 4.8035316 | 3.5603154  |
| 4.4002595 | 2.6052425 | 4.8035316 | 3.5603154  |
| 4.7561965 | 4.2585983 | 5.8021927 | 4.4042945  |
| 4.7561965 | 4.2585983 | 5.8021927 | 4.4042945  |
| 4.7561965 | 4.2585983 | 5.8021927 | 4.4042945  |
| 6.0669155 | 6.0669155 | 6.8421793 | 6.206035   |
| 6.0669155 | 6.0669155 | 6.8421793 | 6.206035   |
| 4.0976577 | 3.1957858 | 3.897755  | 3.5827823  |
| 5.4592195 | 6.7837963 | 7.6949286 | 7.438882   |
| 5.4592195 | 6.7837963 | 7.6949286 | 7.438882   |
| 5.4592195 | 6.7837963 | 7.6949286 | 7.438882   |
| 5.4592195 | 6.7837963 | 7.6949286 | 7.438882   |
| 5.4592195 | 6.7837963 | 7.6949286 | 7.438882   |
| 5.4592195 | 6.7837963 | 7.6949286 | 7.438882   |
| 5.4592195 | 6.7837963 | 7.6949286 | 7.438882   |
| 5.4592195 | 6.7837963 | 7.6949286 | 7.438882   |
| 5.4592195 | 6.7837963 | 7.6949286 | 7.438882   |
| 2.952317  | 2.3408759 | 4.963566  | 4.4330034  |
| 3.9665592 | 2.5355656 | 4.6136804 | 2.6606245  |
| 5.2522335 | 5.906407  | 5.769356  | 5.696725   |
| 2.8779914 | 3.8663142 | 4.0500336 | 3.2643685  |
| 6.669389  | 5.5233006 | 6.646015  | 5.9525433  |
| 4.5112634 | 3.6858318 | 4.1006956 | 3.991607   |
| 4.574152  | 7.3672194 | 6.622568  | 6.9544463  |
| 5.267334  | 4.8084636 | 6.1739955 | 5.202394   |
| 10.962376 | 12.119435 | 11.437958 | 11.74229   |
| 5.833062  | 4.6384826 | 6.068378  | 5.4073334  |
| 10.978442 | 8.980464  | 9.013856  | 8.948195   |
| 3.6547575 | 3.003573  | 2.3618152 | 2.352752   |
| 5.671432  | 7.3039308 | 6.7799    | 6.7863116  |
| 5.671432  | 7.3039308 | 6.7799    | 6.7863116  |
| 4.316754  | 2.8630996 | 2.8752835 | 3.0654106  |
| 3.7741036 | 4.2990413 | 3.5633066 | 3.9851072  |
| 7.835102  | 7.019902  | 7.276976  | 7.0927143  |
| 5.195106  | 4.4706144 | 5.4826636 | 5.226414   |
| 3.434793  | 4.023637  | 2.8970428 | 2.7757387  |
| 4.1564403 | 4.521924  | 4.453799  | 3.595424   |
| 4.595487  | 4.786169  | 5.1691947 | 4.8771996  |
| 4.9523196 | 3.752511  | 4.8692756 | 4.404952   |
| 4.9523196 | 3.752511  | 4.8692756 | 4.404952   |
| 15.066691 | 11.140424 | 12.653332 | 11.657332  |
| 5.058316  | 4.7076597 | 5.904049  | 5.4856815  |
| 2.350709  | 3.9721143 | 5.0308814 | 3.8956127  |
| 8.535077  | 8.99023   | 8.287911  | 8.598453   |
| 3.9162943 | 2.888086  | 3.5786424 | 2.8946195  |
| 6.869166  | 5.2931037 | 6.1753726 | 5.5359774  |
| 8.703615  | 7.588686  | 10.011737 | 9.160585   |

|               |             |             |            |    |           |
|---------------|-------------|-------------|------------|----|-----------|
| ASHGA5P054920 | 4.33314E-05 | 0.00669663  | 3.9365715  | up | noncoding |
| ASHGA5P054920 | 4.33314E-05 | 0.00669663  | 3.9365715  | up | noncoding |
| ASHGA5P054920 | 4.33314E-05 | 0.00669663  | 3.9365715  | up | noncoding |
| ASHGA5P044990 | 0.006976892 | 0.052947146 | 2.0755174  | up | noncoding |
| ASHGA5P043028 | 0.025911715 | 0.100359338 | 3.6736276  | up | noncoding |
| ASHGA5P027749 | 0.012072842 | 0.067365838 | 2.8079336  | up | noncoding |
| ASHGA5P047729 | 0.003734465 | 0.03919943  | 2.4678895  | up | noncoding |
| ASHGA5P047028 | 0.000893083 | 0.020125432 | 4.0765863  | up | noncoding |
| ASHGA5P027386 | 2.62101E-05 | 0.005249161 | 4.3066997  | up | noncoding |
| ASHGA5P027647 | 0.002103004 | 0.03028922  | 2.0381234  | up | noncoding |
| ASHGA5P027647 | 0.002103004 | 0.03028922  | 2.0381234  | up | noncoding |
| ASHGA5P048737 | 0.030251264 | 0.109041885 | 2.3024075  | up | noncoding |
| ASHGA5P045021 | 0.040580077 | 0.128872335 | 2.0796945  | up | noncoding |
| ASHGA5P049569 | 0.012424882 | 0.068295423 | 2.141212   | up | noncoding |
| ASHGA5P015118 | 0.007503929 | 0.054436508 | 2.0250994  | up | noncoding |
| ASHGA5P048208 | 0.018787698 | 0.083353796 | 2.7656626  | up | noncoding |
| ASHGA5P025833 | 0.004330748 | 0.041714476 | 2.0882304  | up | noncoding |
| ASHGA5P025833 | 0.004330748 | 0.041714476 | 2.0882304  | up | noncoding |
| ASHGA5P025833 | 0.004330748 | 0.041714476 | 2.0882304  | up | noncoding |
| ASHGA5P025833 | 0.004330748 | 0.041714476 | 2.0882304  | up | noncoding |
| ASHGA5P048465 | 0.001576938 | 0.026655485 | 2.1805408  | up | noncoding |
| ASHGA5P056376 | 0.043868804 | 0.134396669 | 3.128841   | up | noncoding |
| ASHGA5P050634 | 0.000733646 | 0.018192952 | 2.182906   | up | noncoding |
| ASHGA5P022188 | 0.024606604 | 0.097329913 | 2.5821043  | up | noncoding |
| ASHGA5P047584 | 0.030024918 | 0.108497141 | 2.3140133  | up | noncoding |
| ASHGA5P039023 | 0.016408985 | 0.07821393  | 2.4179316  | up | noncoding |
| ASHGA5P056135 | 0.002918326 | 0.034973658 | 2.4660172  | up | noncoding |
| ASHGA5P046499 | 0.004914871 | 0.044432255 | 4.4191507  | up | noncoding |
| ASHGA5P037342 | 0.000258809 | 0.012173186 | 3.5033705  | up | noncoding |
| ASHGA5P051695 | 0.000158556 | 0.011066341 | 2.1379806  | up | noncoding |
| ASHGA5P035648 | 0.001968108 | 0.029367232 | 2.3655591  | up | noncoding |
| ASHGA5P035648 | 0.001968108 | 0.029367232 | 2.3655591  | up | noncoding |
| ASHGA5P035230 | 0.003642234 | 0.038724469 | 2.8755849  | up | noncoding |
| ASHGA5P018933 | 0.000197821 | 0.01146874  | 3.2231065  | up | noncoding |
| ASHGA5P018933 | 0.000197821 | 0.01146874  | 3.2231065  | up | noncoding |
| ASHGA5P018933 | 0.000197821 | 0.01146874  | 3.2231065  | up | noncoding |
| ASHGA5P018933 | 0.000197821 | 0.01146874  | 3.2231065  | up | noncoding |
| ASHGA5P018933 | 0.000197821 | 0.01146874  | 3.2231065  | up | noncoding |
| ASHGA5P016690 | 0.010622863 | 0.063796341 | 2.0626029  | up | noncoding |
| ASHGA5P015537 | 0.005811063 | 0.048450721 | 2.8671803  | up | noncoding |
| ASHGA5P043828 | 2.48233E-05 | 0.005188131 | 19.8894671 | up | noncoding |
| ASHGA5P056495 | 0.003800056 | 0.039493479 | 2.342502   | up | noncoding |
| ASHGA5P032534 | 8.69644E-05 | 0.008766146 | 3.9934355  | up | noncoding |
| ASHGA5P043271 | 0.008252248 | 0.056900112 | 2.7106875  | up | noncoding |
| ASHGA5P021475 | 0.012356809 | 0.068094238 | 3.7987237  | up | noncoding |
| ASHGA5P057140 | 0.015310837 | 0.075783608 | 2.0865125  | up | noncoding |
| ASHGA5P040524 | 0.016417117 | 0.07821393  | 2.2414036  | up | noncoding |
| ASHGA5P035743 | 0.005651733 | 0.047766529 | 2.0981149  | up | noncoding |
| ASHGA5P053899 | 0.01152501  | 0.066150897 | 2.3034589  | up | noncoding |
| ASHGA5P028787 | 0.004748126 | 0.043793775 | 3.639398   | up | noncoding |
| ASHGA5P042798 | 0.001238993 | 0.023574374 | 2.8055259  | up | noncoding |
| ASHGA5P042798 | 0.001238993 | 0.023574374 | 2.8055259  | up | noncoding |
| ASHGA5P015520 | 0.010427798 | 0.063044889 | 2.2519529  | up | noncoding |
| ASHGA5P015520 | 0.010427798 | 0.063044889 | 2.2519529  | up | noncoding |
| ASHGA5P015520 | 0.010427798 | 0.063044889 | 2.2519529  | up | noncoding |
| ASHGA5P045496 | 0.002326801 | 0.031698104 | 2.0718169  | up | noncoding |
| ASHGA5P043843 | 0.000292412 | 0.012559206 | 7.1084816  | up | noncoding |
| ASHGA5P026546 | 0.000486867 | 0.015406196 | 10.0792354 | up | noncoding |
| ASHGA5P032627 | 0.007464447 | 0.054241022 | 2.7083683  | up | noncoding |
| ASHGA5P033262 | 0.007419999 | 0.054076953 | 2.6334871  | up | noncoding |
| ASHGA5P033262 | 0.007419999 | 0.054076953 | 2.6334871  | up | noncoding |
| ASHGA5P050119 | 0.014485908 | 0.073639339 | 2.173554   | up | noncoding |

|                 |               |                     |       |       |   |
|-----------------|---------------|---------------------|-------|-------|---|
| ENST00000544983 | SNHG1         | GENCODE             | 870   | chr11 | - |
| ENST00000544983 | SNHG1         | GENCODE             | 870   | chr11 | - |
| ENST00000544983 | SNHG1         | GENCODE             | 870   | chr11 | - |
| ENST00000518865 | HAS2-AS1      | GENCODE             | 577   | chr8  | + |
| ENST00000456114 | AC005537.2    | GENCODE             | 636   | chr7  | - |
| ENST00000513358 | RP11-253E3.3  | GENCODE             | 3485  | chr12 | + |
| NR_026941       | CASC2         | RefSeq              | 2407  | chr10 | + |
| uc010qoz.1      | NR_026754     | UCSC_knowngene      | 686   | chr10 | - |
| uc001srm.3      | AK024134      | UCSC_knowngene      | 2486  | chr12 | - |
| ENST00000536910 | RP11-87C12.4  | GENCODE             | 434   | chr12 | - |
| ENST00000536910 | RP11-87C12.4  | GENCODE             | 434   | chr12 | - |
| uc001bqn.3      | SNHG12        | UCSC_knowngene      | 1641  | chr1  | - |
| ENST00000519880 | RP11-89K10.1  | GENCODE             | 574   | chr8  | + |
| ENST00000443508 | RP11-344E13.3 | GENCODE             | 1216  | chr17 | + |
| ENST00000416860 | RP3-395M20.8  | GENCODE             | 3522  | chr1  | - |
| ENST00000534819 | AP003068.18   | GENCODE             | 2354  | chr11 | - |
| NR_038396       | LOC100506469  | RefSeq              | 1651  | chr19 | - |
| NR_038396       | LOC100506469  | RefSeq              | 1651  | chr19 | - |
| NR_038396       | LOC100506469  | RefSeq              | 1651  | chr19 | - |
| NR_038396       | LOC100506469  | RefSeq              | 1651  | chr19 | - |
| ENST00000366405 | AP006216.11   | GENCODE             | 598   | chr11 | - |
| TCONS_00003814  | XLOC_001616   | LincRNAs identified | 448   | chr2  | + |
| ENST00000420330 | AC009404.2    | GENCODE             | 3090  | chr2  | + |
| ENST00000551847 | RP11-722P11.4 | GENCODE             | 588   | chr12 | - |
| ENST00000439157 | RP11-94M14.2  | GENCODE             | 784   | chr10 | + |
| ENST00000464612 | SNHG12        | GENCODE             | 719   | chr1  | - |
| NR_001459       | SNHG10        | RefSeq              | 1341  | chr14 | - |
| ENST00000452501 | RP5-1172N10.2 | GENCODE             | 835   | chrX  | + |
| uc002zej.2      | AX747730      | UCSC_knowngene      | 2538  | chr21 | - |
| NR_033289       | GK5           | RefSeq              | 10938 | chr3  | - |
| ENST00000567819 | RP11-27M15.1  | GENCODE             | 4000  | chr2  | - |
| ENST00000567819 | RP11-27M15.1  | GENCODE             | 4000  | chr2  | - |
| NR_046112       | LOC440894     | RefSeq              | 1092  | chr2  | - |
| NR_027676       | BRCA1         | RefSeq              | 7128  | chr17 | - |
| NR_027676       | BRCA1         | RefSeq              | 7128  | chr17 | - |
| NR_027676       | BRCA1         | RefSeq              | 7128  | chr17 | - |
| NR_027676       | BRCA1         | RefSeq              | 7128  | chr17 | - |
| NR_027676       | BRCA1         | RefSeq              | 7128  | chr17 | - |
| ENST00000433005 | AC003075.4    | GENCODE             | 540   | chr7  | - |
| ENST00000421140 | NSUN5P1       | pseudogene          | 1535  | chr7  | + |
| ENST00000419422 | RP11-132A1.4  | GENCODE             | 705   | chr7  | + |
| TCONS_00004869  | XLOC_001616   | LincRNAs identified | 228   | chr2  | + |
| TCONS_00029032  | XLOC_013952   | LincRNAs identified | 443   | chr21 | + |
| AF143879        |               | LincRNAs identified | 581   | chr16 | + |
| ENST00000533039 | AC005152.2    | GENCODE             | 435   | chr17 | - |
| TCONS_00013654  | XLOC_006311   | LincRNAs identified | 328   | chr7  | + |
| ENST00000503007 | CTD-2201I18.1 | GENCODE             | 956   | chr5  | - |
| ENST00000452342 | RP11-644K8.1  | GENCODE             | 573   | chr2  | + |
| NR_027231       | PPP2R3B-AS1   | RefSeq              | 1532  | chrX  | + |
| uc001uyq.1      | AK054970      | UCSC_knowngene      | 3681  | chr13 | + |
| ENST00000431459 | RP3-436N22.3  | GENCODE             | 677   | chr1  | + |
| ENST00000431459 | RP3-436N22.3  | GENCODE             | 677   | chr1  | + |
| ENST00000453011 | RP11-421L21.3 | GENCODE             | 794   | chr1  | + |
| ENST00000453011 | RP11-421L21.3 | GENCODE             | 794   | chr1  | + |
| ENST00000453011 | RP11-421L21.3 | GENCODE             | 794   | chr1  | + |
| ENST00000428643 | HMGA1P4       | GENCODE             | 334   | chr9  | - |
| ENST00000470135 | RP5-884M6.1   | GENCODE             | 673   | chr7  | + |
| ENST00000423403 | RP11-436K8.1  | GENCODE             | 2344  | chr1  | - |
| ENST00000533996 | AC005152.2    | GENCODE             | 1001  | chr17 | - |
| NR_038415       | BZRAP1-AS1    | RefSeq              | 2404  | chr17 | + |
| NR_038415       | BZRAP1-AS1    | RefSeq              | 2404  | chr17 | + |
| TCONS_00013645  | XLOC_006301   | LincRNAs identified | 2020  | chr7  | + |

|           |           |                     |                             |                       |
|-----------|-----------|---------------------|-----------------------------|-----------------------|
| 62622153  | 62623230  | ENST00000540904,    | CCAGGGTGAATA'23642          | bidirectional         |
| 62622153  | 62623230  | ENST00000540904,    | CCAGGGTGAATA'23642          | bidirectional         |
| 62622153  | 62623230  | ENST00000540904,    | CCAGGGTGAATA'23642          | bidirectional         |
| 122651532 | 122655691 |                     | CTCGCCTCTTGTA'594842        | natural antisense     |
| 43011865  | 43084204  |                     | GACTAGCATTAGCTGTCCTGATTAA'  | intergenic            |
| 3150602   | 3154116   |                     | CAGAATGAAAACGAGATACTTTTCC   | intergenic            |
| 119806331 | 119859647 | uc009xzb.3          | GTTTGGCAGTGT'255082         | bidirectional         |
| 99477216  | 99477902  |                     | ATCCACTGTTTAC'100270710     | natural antisense     |
| 63326429  | 63328915  |                     | GCCTGCCAAACATACCAAACACTAT   | exon sense-overlappi  |
| 122337853 | 122338900 |                     | AAATGAGCCCCAAGAAGAGATCCTC   | intronic antisense    |
| 122337853 | 122338900 |                     | AAATGAGCCCCAAGAAGAGATCCTC   | intronic antisense    |
| 28905049  | 28908366  | uc001bql.3, uc001bq | GTGCTTTAAGGT'85028          | natural antisense     |
| 127570119 | 127725660 |                     | GCTGCAAACCAGGTGACATGAAA'    | intronic antisense    |
| 20824357  | 20833359  |                     | TCTAGTCTACATAACAATGAAAAGGA  | intergenic            |
| 2481358   | 2488450   |                     | AGGAGGGAAACTGAGGCATGGCAA'   | natural antisense     |
| 64941587  | 64943941  |                     | TTTACAATTAACATCTTAAAGGAGT.  | intergenic            |
| 36031639  | 36036931  |                     | CATTGGAAAGGT'100506469      | natural antisense     |
| 36031639  | 36036931  |                     | CATTGGAAAGGT'100506469      | natural antisense     |
| 36031639  | 36036931  |                     | CATTGGAAAGGT'100506469      | natural antisense     |
| 36031639  | 36036931  |                     | CATTGGAAAGGT'100506469      | natural antisense     |
| 116645825 | 116646592 |                     | GAAAAAGCTGCTTATTTTGTGCGTT'  | intergenic            |
| 107384141 | 107394766 | TCONS_00003813      | CTCTACCATGTCTTTTACACACACTC  | intergenic            |
| 118591512 | 118599234 |                     | GGAATTTAACCTCTCAAAAATGCTA'  | intergenic            |
| 48877069  | 48894744  |                     | TGTCTCGGAGAAATAAGGAACAAA'   | natural antisense     |
| 92214454  | 92290873  |                     | AATGAAAAAGTATCACAGCTGAGAC   | intergenic            |
| 28905049  | 28907522  | uc001bqm.3, uc001b  | GGACCAAATGAT'85028          | natural antisense     |
| 95999248  | 96001209  | NR_003138           | ATCAGGAAAGGT'283596         | natural antisense     |
| 41134991  | 41136031  |                     | TTTTGCACACTAATTAATAAACTAC'  | intergenic            |
| 44263542  | 44266080  |                     | CTCTGTTCCCTGTTGAATCATTCTTCG | intron sense-overlapp |
| 141876368 | 141944449 |                     | CCATTGAGCCAG'256356         | exon sense-overlappi  |
| 241522116 | 241526116 |                     | AACCATTTTAGGCTTTGCTGCAACC'  | bidirectional         |
| 241522116 | 241526116 |                     | AACCATTTTAGGCTTTGCTGCAACC'  | bidirectional         |
| 111133764 | 111142102 | NR_046110, NR_04    | CGTAGACCGCGC.440894         | intergenic            |
| 41196311  | 41277340  |                     | TGTCCTTTATGAC'672           | exon sense-overlappi  |
| 41196311  | 41277340  |                     | TGTCCTTTATGAC'672           | exon sense-overlappi  |
| 41196311  | 41277340  |                     | TGTCCTTTATGAC'672           | exon sense-overlappi  |
| 41196311  | 41277340  |                     | TGTCCTTTATGAC'672           | exon sense-overlappi  |
| 41196311  | 41277340  |                     | TGTCCTTTATGAC'672           | exon sense-overlappi  |
| 17325898  | 17338981  |                     | GCCAGTACAGTGTTGTGAACCACTT'  | natural antisense     |
| 75039650  | 75045876  | ENST00000457352,    | TGGATCCTTCTGCAGTGGCTCGGGT   | GAGATGGTATGC          |
| 100951626 | 100954266 |                     | ACTCAATTCAAATATTTAATGGGTT'  | intergenic            |
| 107318305 | 107384278 | TCONS_00003813      | AAGTTGGAGTGGGCCAGGATCCCC    | intergenic            |
| 43474002  | 43475216  |                     | TGGAGGAACTTCTTTACTCCCTTGTT  | intergenic            |
| 25271823  | 25272384  |                     | TTTTCTTAAAATCCCTGGATCTAG'   | intergenic            |
| 70078052  | 70085261  |                     | GGACACAGGATAGCCAAAAACAATC   | intergenic            |
| 156774469 | 156774876 | TCONS_00013655      | GCACACGTAAGCTGTGTGTGTATCA'  | intergenic            |
| 79348196  | 79378227  |                     | GACAGACTAGCTAGAAGGGCTTTCT   | intronic antisense    |
| 20251894  | 20254257  |                     | AATGTCTTCAATGAAAAACAGCCA    | bidirectional         |
| 281384    | 282054    |                     | TTCTAAGGGAAT'283981         | intergenic            |
| 42813345  | 42817026  |                     | CATCTTTCCCAAAGGGCACTGCCTT'  | intergenic            |
| 173524389 | 173581911 |                     | AATCCAGAAGAAGCCAAGTGATCTA'  | intronic antisense    |
| 173524389 | 173581911 |                     | AATCCAGAAGAAGCCAAGTGATCTA'  | natural antisense     |
| 101491433 | 101546118 | ENST00000421013     | CCTAAGCCTGGTTCCTGAATATATC'  | bidirectional         |
| 101491433 | 101546118 | ENST00000421013     | CCTAAGCCTGGTTCCTGAATATATC'  | bidirectional         |
| 101491433 | 101546118 | ENST00000421013     | CCTAAGCCTGGTTCCTGAATATATC'  | bidirectional         |
| 131425412 | 131425857 | NM_002131, NM_1     | TTTGTCCAGCCT'100506080      | intergenic            |
| 106415521 | 106421388 |                     | ATCCTAGGCTCTCAAATGGGAGTC'   | intergenic            |
| 61125302  | 61291256  |                     | GCAGCAAGTTTTTGCCACACTGTAA'  | intergenic            |
| 70072626  | 70081642  |                     | CTCACTTATTGGTGTGTCTTACTGT   | intergenic            |
| 56414562  | 56431088  | ENST00000582348,    | AATTCTCCCCTTA'100506779     | natural antisense     |
| 56414562  | 56431088  | ENST00000582348,    | AATTCTCCCCTTA'100506779     | natural antisense     |
| 154795168 | 154797394 | NR_028090           | TTAATACTACACAGCGCGATTCTA.   | intergenic            |

|                        |           |                        |           |           |
|------------------------|-----------|------------------------|-----------|-----------|
| NM_001012662           | SLC3A2    | 4F2 cell-surface anti  | 62623483  | 62656355  |
| NM_001012664           | SLC3A2    | 4F2 cell-surface anti  | 62623483  | 62656355  |
| NM_002394              | SLC3A2    | 4F2 cell-surface anti  | 62623483  | 62656355  |
| NM_005328              | HAS2      | hyaluronan synthase    | 122625270 | 122653630 |
| NM_014904              | RAB11FIP2 | rab11 family-interact  | 119764426 | 119806114 |
| NM_031484              | MARVELD1  | MARVEL domain-co       | 99473464  | 99477909  |
| NM_020700              | PPM1H     | protein phosphatase    | 63037762  | 63328665  |
| NM_001261400           | PSMD9     | 26S proteasome non-    | 122326636 | 122355771 |
| NM_002813              | PSMD9     | 26S proteasome non-    | 122326636 | 122355771 |
| NM_017846              | TRNAU1AP  | tRNA selenocysteine    | 28879528  | 28905057  |
| NM_174911              | FAM84B    | protein FAM84B         | 127564682 | 127570711 |
| NM_003820              | TNFRSF14  | tumor necrosis factor  | 2487804   | 2495267   |
| NM_001242597           | TMEM147   | transmembrane prote    | 36036501  | 36038429  |
| NM_001242598           | TMEM147   | transmembrane prote    | 36036501  | 36038429  |
| NM_014364              | GAPDHS    | glyceraldehyde-3-ph    | 36024313  | 36036221  |
| NM_032635              | TMEM147   | transmembrane prote    | 36036501  | 36038429  |
| NM_152319              | C12orf54  | uncharacterized prote  | 48876285  | 48890297  |
| NM_017846              | TRNAU1AP  | tRNA selenocysteine    | 28879528  | 28905057  |
| ENST00000331334        | GLRX5     | glutaredoxin 5 [Sour   | 96000929  | 96011055  |
| NM_033661              | WDR4      | tRNA (guanine-N(7)-    | 44263189  | 44299693  |
| NM_001039547           | GK5       | putative glycerol kin  | 141876368 | 141944449 |
| NM_023083              | CAPN10    | calpain-10 isoform a   | 241526132 | 241538526 |
| NM_023085              | CAPN10    | calpain-10 isoform c   | 241526132 | 241538526 |
| NM_007294              | BRCA1     | breast cancer type 1   | 41196311  | 41277500  |
| NM_007297              | BRCA1     | breast cancer type 1   | 41196311  | 41277468  |
| NM_007298              | BRCA1     | breast cancer type 1   | 41196311  | 41276132  |
| NM_007299              | BRCA1     | breast cancer type 1   | 41196311  | 41277468  |
| NM_007300              | BRCA1     | breast cancer type 1   | 41196311  | 41277500  |
| NM_001621              | AHR       | aryl hydrocarbon rec   | 17338275  | 17385775  |
| CGAGCAGACAGCTGGAGGATCC |           |                        |           |           |
| NM_003248              | THBS4     | thrombospondin-4 pr    | 79331169  | 79379107  |
| NM_014713              | LAPTM4A   | lysosomal-associated   | 20232410  | 20251789  |
| NM_198493              | ANKRD45   | ankyrin repeat domai   | 173577474 | 173639001 |
| NM_178527              | SLC9C2    | sodium/hydrogen exc    | 173469603 | 173572233 |
| NM_001077394           | DPH5      | diphthine synthase is  | 101455179 | 101491362 |
| NM_001077395           | DPH5      | diphthine synthase is  | 101455179 | 101491362 |
| NM_015958              | DPH5      | diphthine synthase is  | 101455179 | 101491362 |
| NM_003168              | SUPT4H1   | transcription elongati | 56422538  | 56429563  |
| NM_017763              | RNF43     | E3 ubiquitin-protein   | 56431037  | 56494931  |

|             |             |           |           |            |           |
|-------------|-------------|-----------|-----------|------------|-----------|
| 180.83488   | 30.070663   | 7.10871   | 5.13177   | 182.84227  | 152.143   |
| 180.83488   | 30.070663   | 7.10871   | 5.13177   | 182.84227  | 152.143   |
| 180.83488   | 30.070663   | 7.10871   | 5.13177   | 182.84227  | 152.143   |
| 91.175996   | 26.328714   | 5.95214   | 4.898669  | 83.1811    | 135.25002 |
| 117.609744  | 11.465251   | 5.335665  | 3.45846   | 14.486328  | 4.9999995 |
| 1538.427683 | 333.677995  | 10.162105 | 8.672596  | 1336.8551  | 1103.5818 |
| 189.197688  | 45.819809   | 7.142056  | 5.838778  | 220.39314  | 128.05861 |
| 372.77688   | 60.05476    | 8.056258  | 6.028896  | 513.48016  | 288.01288 |
| 657.95404   | 95.745707   | 8.955364  | 6.848781  | 583.4789   | 528.96326 |
| 507.086297  | 162.625005  | 8.594234  | 7.566992  | 605.621    | 501.05075 |
| 507.086297  | 162.625005  | 8.594234  | 7.566992  | 605.621    | 501.05075 |
| 2530.22405  | 711.632577  | 10.841438 | 9.638295  | 2769.029   | 1977.3496 |
| 48.813225   | 15.811591   | 5.253369  | 4.196997  | 51.120865  | 45.313805 |
| 24.92473    | 8.436517    | 4.282833  | 3.184405  | 15.423272  | 21.952578 |
| 777.750358  | 241.378474  | 9.184056  | 8.166063  | 832.94855  | 1013.3278 |
| 29.540164   | 8.026326    | 4.498291  | 3.030666  | 35.4947    | 19.008764 |
| 75.975198   | 24.057233   | 5.894445  | 4.832164  | 73.84069   | 80.75858  |
| 75.975198   | 24.057233   | 5.894445  | 4.832164  | 73.84069   | 80.75858  |
| 75.975198   | 24.057233   | 5.894445  | 4.832164  | 73.84069   | 80.75858  |
| 75.975198   | 24.057233   | 5.894445  | 4.832164  | 73.84069   | 80.75858  |
| 17.8702     | 6.318612    | 3.827542  | 2.702856  | 14.168272  | 15.19049  |
| 85.050788   | 12.316379   | 5.529681  | 3.884053  | 83.78983   | 154.9158  |
| 196.87908   | 57.29755    | 7.203834  | 6.077584  | 159.077    | 190.41745 |
| 335.896222  | 112.802439  | 7.995954  | 6.627407  | 419.26553  | 403.36816 |
| 75.058325   | 29.243765   | 5.854903  | 4.644506  | 102.06548  | 74.50735  |
| 172.471417  | 44.74099    | 6.994506  | 5.720733  | 224.61816  | 259.58057 |
| 795.406537  | 203.514692  | 9.192968  | 7.890785  | 843.0954   | 1026.2498 |
| 74.666721   | 10.205061   | 5.720218  | 3.576449  | 85.6937    | 27.13005  |
| 679.577615  | 114.329295  | 8.929848  | 7.121104  | 558.5814   | 777.2592  |
| 640.594948  | 211.578949  | 8.722837  | 7.626588  | 933.80945  | 564.97644 |
| 85.188503   | 24.095109   | 6.022231  | 4.78005   | 70.18255   | 64.00482  |
| 85.188503   | 24.095109   | 6.022231  | 4.78005   | 70.18255   | 64.00482  |
| 71.471889   | 16.419471   | 5.727387  | 4.203532  | 98.386765  | 116.41841 |
| 418.285403  | 81.335883   | 8.320208  | 6.631756  | 426.12958  | 411.9262  |
| 418.285403  | 81.335883   | 8.320208  | 6.631756  | 426.12958  | 411.9262  |
| 418.285403  | 81.335883   | 8.320208  | 6.631756  | 426.12958  | 411.9262  |
| 418.285403  | 81.335883   | 8.320208  | 6.631756  | 426.12958  | 411.9262  |
| 418.285403  | 81.335883   | 8.320208  | 6.631756  | 426.12958  | 411.9262  |
| 1223.842268 | 334.41145   | 9.785354  | 8.740888  | 1389.0798  | 770.47095 |
| 429.854458  | 100.00922   | 8.337453  | 6.817821  | 467.67944  | 601.96857 |
| 1509.096197 | 43.281994   | 9.840425  | 5.526493  | 1962.9951  | 3584.4502 |
| 279.135482  | 72.610818   | 7.680527  | 6.452477  | 385.7617   | 360.79395 |
| 80.85338    | 14.897524   | 5.845598  | 3.847968  | 73.09489   | 21.519772 |
| 1516.939075 | 328.215323  | 9.983196  | 8.544537  | 921.80945  | 944.8064  |
| 100.129091  | 19.492326   | 6.240952  | 4.315437  | 92.21349   | 129.14684 |
| 321.343382  | 83.941865   | 7.734266  | 6.673173  | 165.28824  | 135.85593 |
| 95.331405   | 29.976119   | 6.207867  | 5.043465  | 84.87381   | 114.5318  |
| 24.404573   | 8.050207    | 4.271463  | 3.20237   | 29.570974  | 28.668177 |
| 631.988117  | 134.699277  | 8.521364  | 7.317562  | 263.1319   | 231.50162 |
| 3967.356933 | 589.089415  | 11.341603 | 9.477903  | 5004.433   | 1758.6951 |
| 44.455897   | 9.914282    | 5.049132  | 3.56086   | 77.218956  | 53.757744 |
| 44.455897   | 9.914282    | 5.049132  | 3.56086   | 77.218956  | 53.757744 |
| 77.733414   | 20.31152    | 5.80823   | 4.637053  | 97.53706   | 130.54538 |
| 77.733414   | 20.31152    | 5.80823   | 4.637053  | 97.53706   | 130.54538 |
| 77.733414   | 20.31152    | 5.80823   | 4.637053  | 97.53706   | 130.54538 |
| 69440.07717 | 19801.78183 | 15.66342  | 14.612523 | 67264.32   | 79390.15  |
| 148.318122  | 13.436497   | 6.741353  | 3.911812  | 116.191414 | 50.710587 |
| 192.503927  | 10.062512   | 6.717738  | 3.384424  | 59.68862   | 81.30137  |
| 45.547844   | 12.003396   | 5.153216  | 3.715792  | 47.56322   | 41.021297 |
| 46.976064   | 13.030311   | 5.161377  | 3.764403  | 66.94955   | 41.11641  |
| 46.976064   | 13.030311   | 5.161377  | 3.764403  | 66.94955   | 41.11641  |
| 409.899307  | 119.51398   | 8.256198  | 7.136142  | 422.81134  | 519.02527 |

|            |            |           |            |            |            |
|------------|------------|-----------|------------|------------|------------|
| 217.1326   | 113.51922  | 204.64363 | 214.72856  | 25.991026  | 20.767662  |
| 217.1326   | 113.51922  | 204.64363 | 214.72856  | 25.991026  | 20.767662  |
| 217.1326   | 113.51922  | 204.64363 | 214.72856  | 25.991026  | 20.767662  |
| 33.238007  | 42.163578  | 136.16057 | 117.0627   | 19.83546   | 36.848076  |
| 23.989109  | 274.6824   | 122.40533 | 265.0953   | 6.6143966  | 4.9999995  |
| 1376.1947  | 1592.6344  | 1729.8309 | 2091.4692  | 315.04553  | 427.18103  |
| 280.1957   | 224.0028   | 106.49737 | 176.03851  | 49.95746   | 32.42284   |
| 621.37146  | 187.517    | 307.53616 | 318.74362  | 61.96737   | 40.931206  |
| 629.7271   | 589.24524  | 772.6881  | 843.62164  | 82.04427   | 75.50834   |
| 436.6052   | 571.3488   | 442.02316 | 485.86887  | 175.78577  | 76.53575   |
| 436.6052   | 571.3488   | 442.02316 | 485.86887  | 175.78577  | 76.53575   |
| 3350.1558  | 3033.2134  | 1512.9178 | 2538.6787  | 477.60068  | 252.68404  |
| 58.185776  | 59.215923  | 28.971676 | 50.071304  | 11.84207   | 19.213337  |
| 30.738647  | 37.418404  | 21.324707 | 22.69077   | 7.90533    | 9.453952   |
| 576.9785   | 569.4409   | 856.0207  | 817.7857   | 239.45712  | 118.887886 |
| 45.15507   | 19.637293  | 25.12087  | 32.824284  | 4.9999995  | 4.9999995  |
| 57.918995  | 79.91902   | 74.647255 | 88.76665   | 24.201523  | 20.634953  |
| 57.918995  | 79.91902   | 74.647255 | 88.76665   | 24.201523  | 20.634953  |
| 57.918995  | 79.91902   | 74.647255 | 88.76665   | 24.201523  | 20.634953  |
| 57.918995  | 79.91902   | 74.647255 | 88.76665   | 24.201523  | 20.634953  |
| 25.557781  | 18.45012   | 18.57412  | 15.28042   | 5.5480933  | 4.9999995  |
| 4.9999995  | 138.76532  | 39.188484 | 88.645294  | 9.041055   | 18.519518  |
| 113.46336  | 261.12607  | 173.3937  | 283.7969   | 44.92138   | 33.411736  |
| 300.92877  | 226.97661  | 335.39072 | 329.44754  | 152.3677   | 33.3652    |
| 69.51607   | 50.675888  | 85.86268  | 67.72248   | 34.25397   | 8.325015   |
| 168.33998  | 157.4906   | 85.49397  | 139.30522  | 38.447598  | 25.906195  |
| 671.62225  | 421.60147  | 870.4372  | 939.4331   | 160.0924   | 89.64734   |
| 149.19432  | 71.72653   | 47.21085  | 67.044876  | 9.372247   | 9.140191   |
| 317.5048   | 559.97296  | 872.39343 | 991.7539   | 108.09972  | 76.94586   |
| 1308.3344  | 287.22406  | 338.9389  | 410.28644  | 320.1174   | 89.292694  |
| 58.057606  | 119.302025 | 83.93463  | 115.64939  | 20.246746  | 9.506423   |
| 58.057606  | 119.302025 | 83.93463  | 115.64939  | 20.246746  | 9.506423   |
| 50.915565  | 49.22191   | 53.854916 | 60.03377   | 19.434578  | 9.145717   |
| 396.1455   | 436.21747  | 323.58273 | 515.71094  | 78.844574  | 57.823776  |
| 396.1455   | 436.21747  | 323.58273 | 515.71094  | 78.844574  | 57.823776  |
| 396.1455   | 436.21747  | 323.58273 | 515.71094  | 78.844574  | 57.823776  |
| 396.1455   | 436.21747  | 323.58273 | 515.71094  | 78.844574  | 57.823776  |
| 396.1455   | 436.21747  | 323.58273 | 515.71094  | 78.844574  | 57.823776  |
| 1992.0605  | 1274.479   | 740.65436 | 1176.309   | 308.96332  | 218.26926  |
| 343.48306  | 450.98138  | 308.4711  | 406.5432   | 120.323784 | 42.599117  |
| 417.46988  | 1052.4663  | 858.7519  | 1178.4438  | 65.63167   | 85.69997   |
| 229.91965  | 134.12589  | 291.9034  | 272.3083   | 66.0147    | 55.280388  |
| 117.097565 | 98.57164   | 70.0986   | 104.73781  | 8.202189   | 4.9999995  |
| 871.6435   | 3147.6846  | 1068.158  | 2147.5325  | 291.71207  | 82.8703    |
| 69.66507   | 132.8509   | 58.52127  | 118.376976 | 11.799821  | 5.55714    |
| 192.67014  | 590.21124  | 296.63684 | 547.3979   | 84.72529   | 43.72237   |
| 77.81656   | 111.93309  | 73.33651  | 109.49666  | 14.037879  | 17.159573  |
| 17.710218  | 30.248411  | 19.115107 | 21.11455   | 10.31269   | 11.07226   |
| 275.59125  | 399.54913  | 1405.8331 | 1216.3217  | 112.004295 | 53.35271   |
| 7824.3745  | 3917.4458  | 1954.1317 | 3345.0615  | 476.78085  | 249.55103  |
| 46.1333    | 31.872068  | 26.519575 | 31.233742  | 10.32165   | 9.938426   |
| 46.1333    | 31.872068  | 26.519575 | 31.233742  | 10.32165   | 9.938426   |
| 51.329147  | 85.97687   | 32.26762  | 68.74441   | 16.110529  | 17.535566  |
| 51.329147  | 85.97687   | 32.26762  | 68.74441   | 16.110529  | 17.535566  |
| 51.329147  | 85.97687   | 32.26762  | 68.74441   | 16.110529  | 17.535566  |
| 42778.598  | 57473.18   | 83381.445 | 86352.77   | 19923.291  | 10868.388  |
| 148.94994  | 172.5744   | 180.38971 | 221.09268  | 11.924299  | 7.314021   |
| 36.17393   | 359.27698  | 251.19432 | 367.38834  | 6.576742   | 4.9999995  |
| 41.011833  | 63.932007  | 28.507198 | 51.251507  | 8.771919   | 5.313991   |
| 46.827217  | 64.053856  | 22.657846 | 40.251503  | 13.436309  | 4.9999995  |
| 46.827217  | 64.053856  | 22.657846 | 40.251503  | 13.436309  | 4.9999995  |
| 310.75473  | 551.0306   | 260.51932 | 395.25458  | 118.33965  | 56.049164  |

|           |            |           |           |           |           |
|-----------|------------|-----------|-----------|-----------|-----------|
| 30.574865 | 18.859343  | 54.780624 | 29.450455 | 7.0573153 | 7.012863  |
| 30.574865 | 18.859343  | 54.780624 | 29.450455 | 7.0573153 | 7.012863  |
| 30.574865 | 18.859343  | 54.780624 | 29.450455 | 7.0573153 | 7.012863  |
| 8.234385  | 27.913115  | 39.397995 | 25.743252 | 5.9258494 | 6.847015  |
| 5.902166  | 27.174564  | 8.516062  | 15.584317 | 3.3818736 | 2.3499577 |
| 140.1456  | 482.3006   | 307.22974 | 330.16547 | 9.920096  | 9.756766  |
| 47.118816 | 45.072422  | 50.937077 | 49.410236 | 7.334942  | 6.7713237 |
| 75.765854 | 19.505306  | 112.4942  | 49.664623 | 8.519726  | 7.899537  |
| 106.78001 | 61.60821   | 158.37155 | 90.16186  | 8.712161  | 8.734421  |
| 303.38013 | 163.27548  | 149.26431 | 107.50859 | 8.767781  | 8.658075  |
| 303.38013 | 163.27548  | 149.26431 | 107.50859 | 8.767781  | 8.658075  |
| 791.2411  | 460.224    | 1530.067  | 757.97864 | 10.948408 | 10.53186  |
| 5.7927155 | 22.278292  | 15.651379 | 20.091755 | 5.2087345 | 5.3796864 |
| 13.937241 | 9.322579   | 4.9999995 | 4.9999995 | 3.473651  | 4.42137   |
| 433.7217  | 175.48299  | 279.4798  | 201.24135 | 9.239677  | 9.643044  |
| 4.9999995 | 12.701419  | 10.538219 | 9.91832   | 4.6869926 | 4.235627  |
| 35.096867 | 14.941842  | 30.603638 | 18.864578 | 5.750132  | 6.142038  |
| 35.096867 | 14.941842  | 30.603638 | 18.864578 | 5.750132  | 6.142038  |
| 35.096867 | 14.941842  | 30.603638 | 18.864578 | 5.750132  | 6.142038  |
| 35.096867 | 14.941842  | 30.603638 | 18.864578 | 5.750132  | 6.142038  |
| 9.925563  | 7.4380164  | 4.9999995 | 4.9999995 | 3.3514404 | 3.9459188 |
| 11.398189 | 14.24421   | 10.22779  | 10.467509 | 5.936878  | 7.0388107 |
| 51.516277 | 109.169266 | 39.77293  | 64.99371  | 6.855126  | 7.3300815 |
| 335.4761  | 46.05294   | 53.071682 | 56.481014 | 8.253093  | 8.3535595 |
| 87.905815 | 12.483612  | 20.08167  | 12.41251  | 6.2259893 | 6.032944  |
| 55.389153 | 36.570026  | 76.03991  | 36.093056 | 7.360155  | 7.755804  |
| 259.07434 | 137.81052  | 360.803   | 213.66055 | 9.257543  | 9.659721  |
| 6.791268  | 19.146008  | 8.474061  | 8.306592  | 5.967749  | 4.70875   |
| 136.93471 | 78.07656   | 174.99043 | 110.92849 | 8.645444  | 9.272681  |
| 571.5282  | 87.32202   | 119.82334 | 81.39004  | 9.39818   | 8.832876  |
| 29.614586 | 25.100039  | 37.75484  | 22.348022 | 5.674142  | 5.8288918 |
| 29.614586 | 25.100039  | 37.75484  | 22.348022 | 5.674142  | 5.8288918 |
| 30.35411  | 11.15995   | 16.153307 | 12.269162 | 6.170934  | 6.639543  |
| 101.47321 | 61.63271   | 120.17716 | 68.063866 | 8.275042  | 8.381755  |
| 101.47321 | 61.63271   | 120.17716 | 68.063866 | 8.275042  | 8.381755  |
| 101.47321 | 61.63271   | 120.17716 | 68.063866 | 8.275042  | 8.381755  |
| 101.47321 | 61.63271   | 120.17716 | 68.063866 | 8.275042  | 8.381755  |
| 101.47321 | 61.63271   | 120.17716 | 68.063866 | 8.275042  | 8.381755  |
| 362.6533  | 394.92578  | 395.15454 | 326.5025  | 9.968546  | 9.258819  |
| 173.29825 | 60.26799   | 130.7862  | 72.779976 | 8.395008  | 8.9183035 |
| 38.28265  | 26.29105   | 26.107653 | 17.67897  | 10.459863 | 11.386386 |
| 114.21007 | 68.62345   | 87.36004  | 44.17626  | 8.132907  | 8.202782  |
| 23.156528 | 26.224173  | 9.2559    | 17.546356 | 5.735957  | 4.3904557 |
| 548.2862  | 343.49237  | 399.95132 | 302.97968 | 9.380915  | 9.545704  |
| 22.65059  | 14.33523   | 41.589203 | 21.02197  | 6.076598  | 6.7824187 |
| 119.43838 | 104.8186   | 73.36551  | 77.58104  | 6.911137  | 6.8527837 |
| 19.744463 | 31.32882   | 62.12702  | 35.45896  | 5.954436  | 6.6181297 |
| 9.440879  | 6.5167637  | 4.9999995 | 5.958649  | 4.429617  | 4.782638  |
| 167.65651 | 126.66384  | 206.338   | 142.18031 | 7.583443  | 7.5958595 |
| 726.70026 | 532.35925  | 948.3699  | 600.7752  | 11.794888 | 10.375759 |
| 10.41178  | 10.591329  | 12.65914  | 5.5633664 | 5.816922  | 5.605269  |
| 10.41178  | 10.591329  | 12.65914  | 5.5633664 | 5.816922  | 5.605269  |
| 17.957142 | 25.46832   | 25.446932 | 19.35063  | 6.1588383 | 6.7959785 |
| 17.957142 | 25.46832   | 25.446932 | 19.35063  | 6.1588383 | 6.7959785 |
| 17.957142 | 25.46832   | 25.446932 | 19.35063  | 6.1588383 | 6.7959785 |
| 30705.084 | 17006.344  | 23686.672 | 16620.912 | 15.633382 | 15.928686 |
| 13.711262 | 27.526144  | 8.078949  | 12.06431  | 6.4076834 | 5.532311  |
| 7.595521  | 13.06983   | 18.060938 | 10.07204  | 5.441412  | 6.1508594 |
| 17.11611  | 10.873049  | 20.951912 | 8.993396  | 5.114172  | 5.2504067 |
| 19.541462 | 16.419224  | 9.219217  | 14.565652 | 5.605556  | 5.253018  |
| 19.541462 | 16.419224  | 9.219217  | 14.565652 | 5.605556  | 5.253018  |
| 195.05408 | 91.848694  | 155.39217 | 100.40012 | 8.266052  | 8.706419  |



|           |           |           |           |           |           |
|-----------|-----------|-----------|-----------|-----------|-----------|
| 7.4418373 | 6.4885564 | 7.438882  | 7.212807  | 4.941611  | 5.2089453 |
| 7.4418373 | 6.4885564 | 7.438882  | 7.212807  | 4.941611  | 5.2089453 |
| 7.4418373 | 6.4885564 | 7.438882  | 7.212807  | 4.941611  | 5.2089453 |
| 4.7415357 | 4.9852037 | 6.865146  | 6.34809   | 4.5450134 | 6.0508866 |
| 4.2774057 | 7.7835183 | 6.714956  | 7.506278  | 2.921372  | 2.4279919 |
| 10.060663 | 10.335355 | 10.462447 | 10.437304 | 8.572818  | 9.604408  |
| 7.793617  | 7.4981923 | 6.518916  | 6.9353433 | 5.8783264 | 5.8579593 |
| 8.904858  | 7.228176  | 8.015696  | 7.7695537 | 6.1891227 | 6.200208  |
| 8.932674  | 8.882537  | 9.333313  | 9.137076  | 6.5830436 | 7.084866  |
| 8.4220705 | 8.839325  | 8.529139  | 8.349012  | 7.7106805 | 7.108122  |
| 8.4220705 | 8.839325  | 8.529139  | 8.349012  | 7.7106805 | 7.108122  |
| 11.336502 | 11.233106 | 10.291988 | 10.706762 | 9.167047  | 8.839019  |
| 5.5477166 | 5.507521  | 4.719424  | 5.1571293 | 3.79319   | 5.089304  |
| 4.6352534 | 4.795754  | 4.3115187 | 4.059448  | 3.1822972 | 4.017111  |
| 8.810124  | 8.832589  | 9.484455  | 9.094446  | 8.15608   | 7.740559  |
| 5.177009  | 3.7711673 | 4.5374103 | 4.581539  | 2.3467326 | 2.4279919 |
| 5.541789  | 5.961829  | 6.016682  | 5.9542017 | 4.8394785 | 5.199183  |
| 5.541789  | 5.961829  | 6.016682  | 5.9542017 | 4.8394785 | 5.199183  |
| 5.541789  | 5.961829  | 6.016682  | 5.9542017 | 4.8394785 | 5.199183  |
| 5.541789  | 5.961829  | 6.016682  | 5.9542017 | 4.8394785 | 5.199183  |
| 4.365098  | 3.6699626 | 4.1219177 | 3.510912  | 2.671759  | 2.4279919 |
| 2.3258038 | 6.7914143 | 5.1340356 | 5.9511466 | 3.3905108 | 5.032044  |
| 6.5075173 | 7.714591  | 7.210077  | 7.6056113 | 5.7195506 | 5.900133  |
| 7.8992696 | 7.5216265 | 8.135006  | 7.813172  | 7.4905844 | 5.898205  |
| 5.8094444 | 5.27034   | 6.21836   | 5.57234   | 5.3291874 | 3.8263674 |
| 7.065048  | 6.9781785 | 6.213038  | 6.5948143 | 5.4992824 | 5.529325  |
| 9.025662  | 8.411921  | 9.510809  | 9.292154  | 7.569208  | 7.335156  |
| 6.892893  | 5.801633  | 5.3921776 | 5.5581074 | 3.4431586 | 3.9676578 |
| 7.9750853 | 8.805205  | 9.513727  | 9.366946  | 6.9931664 | 7.1162405 |
| 9.995662  | 7.8504696 | 8.1506815 | 8.109154  | 8.59319   | 7.3283076 |
| 5.545344  | 6.5665956 | 6.187197  | 6.331216  | 4.5739746 | 4.025434  |
| 5.545344  | 6.5665956 | 6.187197  | 6.331216  | 4.5739746 | 4.025434  |
| 5.3541613 | 5.229281  | 5.5673723 | 5.4030333 | 4.517703  | 3.9683623 |
| 8.281262  | 8.45911   | 8.087202  | 8.436878  | 6.5251675 | 6.7055874 |
| 8.281262  | 8.45911   | 8.087202  | 8.436878  | 6.5251675 | 6.7055874 |
| 8.281262  | 8.45911   | 8.087202  | 8.436878  | 6.5251675 | 6.7055874 |
| 8.281262  | 8.45911   | 8.087202  | 8.436878  | 6.5251675 | 6.7055874 |
| 8.281262  | 8.45911   | 8.087202  | 8.436878  | 6.5251675 | 6.7055874 |
| 10.600171 | 9.997466  | 9.270403  | 9.616721  | 8.535715  | 8.625251  |
| 8.085681  | 8.50734   | 8.021917  | 8.096471  | 7.143567  | 6.25911   |
| 8.361902  | 9.72453   | 9.489901  | 9.61997   | 6.273701  | 7.274063  |
| 7.522901  | 6.73819   | 7.946139  | 7.540243  | 6.2818007 | 6.6394205 |
| 6.5527864 | 6.2731137 | 5.9309254 | 6.1903496 | 3.2397518 | 2.4279919 |
| 9.410206  | 11.284947 | 9.806539  | 10.470865 | 8.450581  | 7.2255673 |
| 5.812     | 6.723474  | 5.682771  | 6.3684483 | 3.7895691 | 3.2103212 |
| 7.2716055 | 8.884542  | 7.97      | 8.515529  | 6.6284337 | 6.2961993 |
| 5.9670444 | 6.463563  | 5.9904175 | 6.253614  | 4.037688  | 4.9212966 |
| 3.8263674 | 4.468565  | 4.1595173 | 3.9620757 | 3.5931666 | 4.261097  |
| 7.7705693 | 8.329194  | 10.181695 | 9.667421  | 7.043127  | 6.586653  |
| 12.564281 | 11.587498 | 10.635328 | 11.091865 | 9.165044  | 8.819457  |
| 5.205726  | 4.5491076 | 4.6070275 | 4.5107374 | 3.594371  | 4.094766  |
| 5.205726  | 4.5491076 | 4.6070275 | 4.5107374 | 3.594371  | 4.094766  |
| 5.3647127 | 6.070762  | 4.8686223 | 5.5904655 | 4.242664  | 4.954302  |
| 5.3647127 | 6.070762  | 4.8686223 | 5.5904655 | 4.242664  | 4.954302  |
| 5.3647127 | 6.070762  | 4.8686223 | 5.5904655 | 4.242664  | 4.954302  |
| 15.083024 | 15.646477 | 15.917739 | 15.771212 | 14.52811  | 14.303534 |
| 6.8907437 | 7.1033864 | 7.264512  | 7.249484  | 3.804501  | 3.6306033 |
| 4.8608136 | 8.166241  | 7.732921  | 7.954182  | 2.9142737 | 2.4279919 |
| 5.0403814 | 5.625095  | 4.7007823 | 5.1884604 | 3.3443246 | 3.142225  |
| 5.230659  | 5.628236  | 4.3940125 | 4.85678   | 3.9753897 | 2.4279919 |
| 5.230659  | 5.628236  | 4.3940125 | 4.85678   | 3.9753897 | 2.4279919 |
| 7.9430966 | 8.783311  | 7.7836957 | 8.054611  | 7.1229963 | 6.661609  |

|           |           |           |           |
|-----------|-----------|-----------|-----------|
| 4.9483643 | 4.3894362 | 6.0394397 | 5.2628264 |
| 4.9483643 | 4.3894362 | 6.0394397 | 5.2628264 |
| 4.9483643 | 4.3894362 | 6.0394397 | 5.2628264 |
| 3.1732607 | 5.006796  | 5.570228  | 5.045829  |
| 2.7705443 | 4.9631624 | 3.3842592 | 4.2834272 |
| 7.083676  | 9.360057  | 8.50676   | 8.907859  |
| 5.556664  | 5.746815  | 5.9409275 | 6.0519753 |
| 6.2136497 | 4.440398  | 7.069037  | 6.060962  |
| 6.7027397 | 6.2405453 | 7.5370455 | 6.9444456 |
| 8.192692  | 7.725996  | 7.4491997 | 7.215264  |
| 8.192692  | 7.725996  | 7.4491997 | 7.215264  |
| 9.574456  | 9.29452   | 10.827551 | 10.127174 |
| 2.7476184 | 4.6481557 | 4.2401876 | 4.6635265 |
| 3.8744755 | 3.3179784 | 2.3618152 | 2.352752  |
| 8.716484  | 7.8325357 | 8.377428  | 8.173292  |
| 2.350709  | 3.783199  | 3.6797721 | 3.5955896 |
| 5.140481  | 4.0383453 | 5.210716  | 4.5647826 |
| 5.140481  | 4.0383453 | 5.210716  | 4.5647826 |
| 5.140481  | 4.0383453 | 5.210716  | 4.5647826 |
| 5.140481  | 4.0383453 | 5.210716  | 4.5647826 |
| 3.4172828 | 2.9855325 | 2.3618152 | 2.352752  |
| 3.6064384 | 3.9621627 | 3.6339662 | 3.6791968 |
| 5.6787343 | 7.11353   | 5.5854106 | 6.4681454 |
| 8.334832  | 5.782071  | 5.9981976 | 6.260553  |
| 6.426432  | 3.758215  | 4.592008  | 3.934825  |
| 5.7845125 | 5.4237294 | 6.510322  | 5.577226  |
| 7.9639835 | 7.476079  | 8.732428  | 8.2678585 |
| 2.9334874 | 4.4124527 | 3.374927  | 3.3270118 |
| 7.0523367 | 6.6101685 | 7.6928453 | 7.2618694 |
| 9.104666  | 6.779653  | 7.153521  | 6.800193  |
| 4.907283  | 4.838899  | 5.508935  | 4.8257737 |
| 4.907283  | 4.838899  | 5.508935  | 4.8257737 |
| 4.9389505 | 3.591111  | 4.286369  | 3.9186964 |
| 6.6268044 | 6.2408614 | 7.1584487 | 6.5336685 |
| 6.6268044 | 6.2408614 | 7.1584487 | 6.5336685 |
| 6.6268044 | 6.2408614 | 7.1584487 | 6.5336685 |
| 6.6268044 | 6.2408614 | 7.1584487 | 6.5336685 |
| 6.6268044 | 6.2408614 | 7.1584487 | 6.5336685 |
| 8.4484215 | 9.075708  | 8.867599  | 8.892635  |
| 7.390444  | 6.203667  | 7.2755623 | 6.6345744 |
| 5.260334  | 4.908648  | 4.9746823 | 4.4675274 |
| 6.797867  | 6.409382  | 6.702343  | 5.884047  |
| 4.5643773 | 4.9037623 | 3.4965007 | 4.4554214 |
| 9.048474  | 8.87404   | 8.885891  | 8.78267   |
| 4.5336795 | 3.9719284 | 5.651573  | 4.73555   |
| 6.8601804 | 7.06087   | 6.4603744 | 6.732978  |
| 4.348615  | 5.1814675 | 6.2221513 | 5.5495715 |
| 3.353395  | 2.8061018 | 2.3618152 | 2.8386428 |
| 7.338382  | 7.3527207 | 7.9408245 | 7.6436634 |
| 9.448594  | 9.515962  | 10.137314 | 9.781049  |
| 3.484622  | 3.5114553 | 3.9380352 | 2.7419126 |
| 3.484622  | 3.5114553 | 3.9380352 | 2.7419126 |
| 4.219835  | 4.860328  | 4.9398108 | 4.6053796 |
| 4.219835  | 4.860328  | 4.9398108 | 4.6053796 |
| 4.219835  | 4.860328  | 4.9398108 | 4.6053796 |
| 14.848997 | 14.481314 | 14.881725 | 14.631461 |
| 3.8503883 | 4.9836664 | 3.3075917 | 3.8941212 |
| 3.0679133 | 3.829095  | 4.44475   | 3.6225193 |
| 4.15174   | 3.5504122 | 4.6562467 | 3.4498057 |
| 4.3335614 | 4.18026   | 3.4906552 | 4.178557  |
| 4.3335614 | 4.18026   | 3.4906552 | 4.178557  |
| 7.5585427 | 6.8534713 | 7.5092316 | 7.1109986 |

|               |             |             |            |    |           |
|---------------|-------------|-------------|------------|----|-----------|
| ASHGA5P020761 | 0.000326356 | 0.013106479 | 3.5909488  | up | noncoding |
| ASHGA5P032302 | 0.00361608  | 0.038659181 | 2.0337598  | up | noncoding |
| ASHGA5P033751 | 0.024967477 | 0.098084897 | 2.8377016  | up | noncoding |
| ASHGA5P029834 | 0.013965155 | 0.072372115 | 2.8647469  | up | noncoding |
| ASHGA5P038154 | 0.001656819 | 0.027211232 | 2.0453571  | up | noncoding |
| ASHGA5P053871 | 0.00240466  | 0.031940985 | 2.7583027  | up | noncoding |
| ASHGA5P020270 | 0.003380319 | 0.037497733 | 2.0798694  | up | noncoding |
| ASHGA5P058787 | 0.027168392 | 0.102915644 | 16.3258507 | up | noncoding |
| ASHGA5P020212 | 0.001432535 | 0.025327629 | 2.2029247  | up | noncoding |
| ASHGA5P014601 | 0.009777337 | 0.061358967 | 2.2900153  | up | noncoding |
| ASHGA5P018688 | 0.00063439  | 0.017037535 | 8.3673191  | up | noncoding |
| ASHGA5P038962 | 0.000983368 | 0.021190872 | 2.7449262  | up | noncoding |
| ASHGA5P036150 | 0.00335989  | 0.037423637 | 2.4034216  | up | noncoding |
| ASHGA5P014592 | 0.006825268 | 0.05243611  | 2.1242504  | up | noncoding |
| ASHGA5P031079 | 0.046244386 | 0.138653053 | 3.54109    | up | noncoding |
| ASHGA5P018893 | 0.002080118 | 0.030104322 | 2.1754037  | up | noncoding |
| ASHGA5P033707 | 0.00013393  | 0.010633934 | 4.2428513  | up | noncoding |
| ASHGA5P033707 | 0.00013393  | 0.010633934 | 4.2428513  | up | noncoding |
| ASHGA5P033707 | 0.00013393  | 0.010633934 | 4.2428513  | up | noncoding |
| ASHGA5P033707 | 0.00013393  | 0.010633934 | 4.2428513  | up | noncoding |
| ASHGA5P033707 | 0.00013393  | 0.010633934 | 4.2428513  | up | noncoding |
| ASHGA5P033707 | 0.00013393  | 0.010633934 | 4.2428513  | up | noncoding |
| ASHGA5P033707 | 0.00013393  | 0.010633934 | 4.2428513  | up | noncoding |
| ASHGA5P033707 | 0.00013393  | 0.010633934 | 4.2428513  | up | noncoding |
| ASHGA5P033707 | 0.00013393  | 0.010633934 | 4.2428513  | up | noncoding |
| ASHGA5P033707 | 0.00013393  | 0.010633934 | 4.2428513  | up | noncoding |
| ASHGA5P023344 | 0.00327018  | 0.036994062 | 2.9736007  | up | noncoding |
| ASHGA5P031297 | 0.000641329 | 0.017037535 | 4.2764071  | up | noncoding |
| ASHGA5P031297 | 0.000641329 | 0.017037535 | 4.2764071  | up | noncoding |
| ASHGA5P019262 | 0.001316849 | 0.024205782 | 2.6385896  | up | noncoding |
| ASHGA5P014826 | 0.003303647 | 0.037195092 | 3.0458737  | up | noncoding |
| ASHGA5P051208 | 0.010201044 | 0.062583107 | 2.0992737  | up | noncoding |
| ASHGA5P034997 | 0.000135467 | 0.01066938  | 6.9610936  | up | noncoding |
| ASHGA5P046609 | 0.037154537 | 0.12233581  | 2.2310653  | up | noncoding |
| ASHGA5P045761 | 0.032419657 | 0.113226764 | 2.9704575  | up | noncoding |
| ASHGA5P028678 | 0.004683784 | 0.043516706 | 2.5778979  | up | noncoding |
| ASHGA5P038916 | 0.023453944 | 0.094851476 | 2.0534159  | up | noncoding |
| ASHGA5P022540 | 0.000168476 | 0.011182026 | 3.0095913  | up | noncoding |
| ASHGA5P057661 | 0.01261375  | 0.068765796 | 2.2841049  | up | noncoding |
| ASHGA5P037190 | 0.041213229 | 0.129607517 | 3.7464411  | up | noncoding |
| ASHGA5P026751 | 0.038361935 | 0.124649282 | 2.0480592  | up | noncoding |
| ASHGA5P035797 | 0.000276842 | 0.012382074 | 2.4151655  | up | noncoding |
| ASHGA5P029350 | 0.002497826 | 0.032458616 | 2.994991   | up | noncoding |
| ASHGA5P044556 | 0.004491299 | 0.04262056  | 2.5231497  | up | noncoding |
| ASHGA5P044201 | 1.25934E-06 | 0.001921139 | 4.3241656  | up | noncoding |
| ASHGA5P028572 | 0.00099745  | 0.02136839  | 3.5062174  | up | noncoding |
| ASHGA5P050560 | 0.037299144 | 0.122530061 | 2.5466391  | up | noncoding |
| ASHGA5P050560 | 0.037299144 | 0.122530061 | 2.5466391  | up | noncoding |
| ASHGA5P050560 | 0.037299144 | 0.122530061 | 2.5466391  | up | noncoding |
| ASHGA5P050560 | 0.037299144 | 0.122530061 | 2.5466391  | up | noncoding |
| ASHGA5P044550 | 0.012820679 | 0.069304541 | 2.7172429  | up | noncoding |
| ASHGA5P017547 | 0.011809563 | 0.066828817 | 2.4095549  | up | noncoding |
| ASHGA5P017547 | 0.011809563 | 0.066828817 | 2.4095549  | up | noncoding |
| ASHGA5P017547 | 0.011809563 | 0.066828817 | 2.4095549  | up | noncoding |
| ASHGA5P017736 | 6.68713E-05 | 0.007985351 | 2.9989223  | up | noncoding |
| ASHGA5P041202 | 0.001083178 | 0.022256512 | 2.9346585  | up | noncoding |
| ASHGA5P016010 | 0.001379538 | 0.024821649 | 2.3705062  | up | noncoding |
| ASHGA5P042986 | 0.000269532 | 0.012302262 | 5.3938367  | up | noncoding |
| ASHGA5P042986 | 0.000269532 | 0.012302262 | 5.3938367  | up | noncoding |
| ASHGA5P042986 | 0.000269532 | 0.012302262 | 5.3938367  | up | noncoding |
| ASHGA5P056420 | 0.008612892 | 0.057872881 | 2.5909803  | up | noncoding |
| ASHGA5P044152 | 0.014252965 | 0.073184388 | 2.5945167  | up | noncoding |
| ASHGA5P039790 | 0.024889627 | 0.097963763 | 2.6099004  | up | noncoding |
| ASHGA5P035922 | 0.009187003 | 0.059691382 | 2.5551076  | up | noncoding |

| ENST00000519481 | PVT1             | GENCODE             | 542  | chr8  | + |
|-----------------|------------------|---------------------|------|-------|---|
| ENST00000582718 | AC010761.8       | GENCODE             | 899  | chr17 | - |
| ENST00000581724 | RP11-21G15.1     | GENCODE             | 1908 | chr18 | + |
| ENST00000546968 | RP11-44N21.1     | GENCODE             | 965  | chr14 | + |
| NR_038320       | LOC100507634     | RefSeq              | 2048 | chr1  | + |
| NR_051970       | MRPS2            | RefSeq              | 1661 | chr9  | + |
| ENST00000510692 | RP11-423H2.1     | GENCODE             | 551  | chr5  | + |
| uc.247+         | uc.247           | UCR                 | 361  | chr9  | + |
| ENST00000509713 | RP11-553P9.2     | GENCODE             | 284  | chr4  | + |
| ENST00000411727 | RP11-33A14.1     | GENCODE             | 2100 | chr3  | - |
| ENST00000456532 | RP5-1158E12.3    | GENCODE             | 375  | chrX  | - |
| ENST00000485898 | RP11-18H7.1      | GENCODE             | 545  | chr3  | + |
| NR_002909       | SNHG3            | RefSeq              | 2238 | chr1  | + |
| ENST00000411666 | RP11-319I23.2    | GENCODE             | 318  | chr10 | + |
| ENST00000366408 | RP11-375F2.2     | GENCODE             | 1129 | chr1  | - |
| ENST00000484945 | FAM86DP          | GENCODE             | 2238 | chr3  | - |
| uc010wzb.2      | BX647607         | UCSC_knowngene      | 2932 | chr18 | + |
| uc010wzb.2      | BX647607         | UCSC_knowngene      | 2932 | chr18 | + |
| uc010wzb.2      | BX647607         | UCSC_knowngene      | 2932 | chr18 | + |
| uc010wzb.2      | BX647607         | UCSC_knowngene      | 2932 | chr18 | + |
| uc010wzb.2      | BX647607         | UCSC_knowngene      | 2932 | chr18 | + |
| uc010wzb.2      | BX647607         | UCSC_knowngene      | 2932 | chr18 | + |
| uc010wzb.2      | BX647607         | UCSC_knowngene      | 2932 | chr18 | + |
| uc010wzb.2      | BX647607         | UCSC_knowngene      | 2932 | chr18 | + |
| NR_003697       | SNHG15           | RefSeq              | 837  | chr7  | - |
| ENST00000436656 | GAS5             | GENCODE             | 822  | chr1  | - |
| ENST00000436656 | GAS5             | GENCODE             | 822  | chr1  | - |
| NR_027139       | SPIN3            | RefSeq              | 1721 | chrX  | - |
| ENST00000413755 | RP4-564F22.2     | GENCODE             | 648  | chr20 | - |
| ENST00000359859 | TMEM191A         | GENCODE             | 736  | chr22 | + |
| ENST00000457457 | AC016735.1       | GENCODE             | 237  | chr2  | - |
| ENST00000416381 | LL0XNC01-157D4.1 | GENCODE             | 2012 | chrX  | + |
| ENST00000429567 | RP11-470P21.2    | GENCODE             | 443  | chr9  | + |
| ENST00000426991 | ANKRD10-IT1      | GENCODE             | 380  | chr13 | - |
| ENST00000462011 | RP11-201E8.1     | GENCODE             | 2305 | chr3  | + |
| ENST00000561384 | CTD-2008A1.2     | GENCODE             | 1045 | chr15 | - |
| TCONS_00020514  | XLOC_009831      | LincRNAs identified | 4970 | chr12 | + |
| ENST00000457565 | AP001464.4       | GENCODE             | 323  | chr21 | - |
| ENST00000528717 | RP11-315O6.1     | GENCODE             | 692  | chr11 | + |
| TCONS_00003222  | XLOC_002007      | LincRNAs identified | 535  | chr2  | - |
| ENST00000553270 | RP11-1029J19.4   | GENCODE             | 539  | chr14 | - |
| ENST00000560295 | CTA-204B4.6      | GENCODE             | 9346 | chr8  | - |
| ENST00000519738 | RP11-150O12.1    | GENCODE             | 733  | chr8  | - |
| uc001vgl.1      | THSD1P1          | UCSC_knowngene      | 3493 | chr13 | - |
| uc002sro.3      | BC066991         | UCSC_knowngene      | 1946 | chr2  | + |
| uc002sro.3      | BC066991         | UCSC_knowngene      | 1946 | chr2  | + |
| uc002sro.3      | BC066991         | UCSC_knowngene      | 1946 | chr2  | + |
| uc002sro.3      | BC066991         | UCSC_knowngene      | 1946 | chr2  | + |
| ENST00000518973 | RP11-238K6.1     | GENCODE             | 4171 | chr8  | - |
| ENST00000442967 | AC017096.1       | GENCODE             | 560  | chr2  | + |
| ENST00000442967 | AC017096.1       | GENCODE             | 560  | chr2  | + |
| ENST00000442967 | AC017096.1       | GENCODE             | 560  | chr2  | + |
| ENST00000445226 | RP11-7O11.3      | GENCODE             | 294  | chr1  | - |
| ENST00000389897 | RP11-98D18.9     | GENCODE             | 992  | chr1  | + |
| ENST00000425771 | GAS5             | GENCODE             | 242  | chr1  | - |
| NR_024466       | LSM5             | RefSeq              | 3022 | chr7  | - |
| NR_024466       | LSM5             | RefSeq              | 3022 | chr7  | - |
| NR_024466       | LSM5             | RefSeq              | 3022 | chr7  | - |
| TCONS_00004137  | XLOC_001980      | LincRNAs identified | 1213 | chr2  | - |
| TCONS_00014734  | XLOC_006819      | LincRNAs identified | 566  | chr8  | + |
| NR_037888       | LOC100507266     | RefSeq              | 2481 | chr4  | + |
| uc010fdz.3      | OR7E91P          | UCSC_knowngene      | 1287 | chr2  | + |

| 128902922 | 129008896 | TGGGCTTGAGAA' 5820                         | intronic antisense    |
|-----------|-----------|--------------------------------------------|-----------------------|
| 27048504  | 27049895  | TGCATTTTCTTTCTCTTGAAGGGCTC                 | natural antisense     |
| 10726629  | 10728537  | CGAATCTGTTCTGTGGAAAATGCAT                  | intronic antisense    |
| 105561527 | 105565341 | GAGATAAACTTTATGTGACCTTGGT                  | intergenic            |
| 55681080  | 55683128  | CTAAACTGATGT/ 100507634                    | bidirectional         |
| 138392476 | 138396519 | CCTGCCGTAGAT/ 51116                        | exon sense-overlappi  |
| 177259752 | 177309517 | GAAGGAACATGTCAAAGAAAACAA/                  | intergenic            |
| 969153    | 969514    | TTATTGCCCAGTGCTTTACGAGTTT/                 | intergenic            |
| 136013548 | 136018804 | CCGTGTCAAGCTCTTCCTCTTGTGTA                 | intergenic            |
| 178051326 | 178103184 | CAATGACTTATTGTTGTTGTTTGT                   | intronic antisense    |
| 45707508  | 45710920  | CTGCGCGCAGGTGGCAGTGTAGAAC                  | intergenic            |
| 119814476 | 119817634 | TAATATGGTTGTTACTACAAAGTTT/                 | intergenic            |
| 28832454  | 28837404  | NR_036473 CCAGTCCCATCCC 8420               | exon sense-overlappi  |
| 120117056 | 120118715 | ENST00000445161 CATCCAAAGATAATACTACCTTCAG  | intergenic            |
| 168873142 | 169056243 | TAATCCTCTTTTAAGAAGAAGGGGT                  | intergenic            |
| 75470710  | 75484108  | ENST00000427587, CTCCTGCCACAG/ 692099      | intergenic            |
| 3594445   | 3597377   | CTTGTCAGATGTCACCTTTTCAGCAAC                | intronic antisense    |
| 3594445   | 3597377   | CTTGTCAGATGTCACCTTTTCAGCAAC                | intronic antisense    |
| 3594445   | 3597377   | CTTGTCAGATGTCACCTTTTCAGCAAC                | intronic antisense    |
| 3594445   | 3597377   | CTTGTCAGATGTCACCTTTTCAGCAAC                | intronic antisense    |
| 3594445   | 3597377   | CTTGTCAGATGTCACCTTTTCAGCAAC                | intronic antisense    |
| 3594445   | 3597377   | CTTGTCAGATGTCACCTTTTCAGCAAC                | intronic antisense    |
| 3594445   | 3597377   | CTTGTCAGATGTCACCTTTTCAGCAAC                | intronic antisense    |
| 3594445   | 3597377   | CTTGTCAGATGTCACCTTTTCAGCAAC                | intronic antisense    |
| 45022626  | 45026259  | ENST00000580458, AAGCAGTCTTTG/ 285958      | intergenic            |
| 173833038 | 173837127 | ENST00000416952, GAAATCTTTTAG/ 60674       | bidirectional         |
| 173833038 | 173837127 | ENST00000416952, GAAATCTTTTAG/ 60674       | bidirectional         |
| 57002802  | 57021988  | TGGGCATAAGGT. 169981                       | exon sense-overlappi  |
| 37050838  | 37063996  | AAGACACTGGCGGGAGTGTAACATC                  | intergenic            |
| 21055219  | 21055955  | GATGGTGACCCT/ 84222                        | intergenic            |
| 43228494  | 43233200  | TCONS_00004225 TGGCCTGGAACCTAAGACTTGTCCA   | intergenic            |
| 102094835 | 102121752 | GTTTACTTGTGTTGTCTGTGATAAAT/                | intergenic            |
| 72087381  | 72109429  | GCCACACAAATAATGCATTTCTCAC                  | intronic antisense    |
| 111547405 | 111551519 | GTAGCTTCTCATTCTCTGTTTCTTG                  | intron sense-overlapp |
| 99316907  | 99342664  | TGGATATTACTTAGCTTAATAGTTCC                 | intergenic            |
| 45119397  | 45176892  | ENST00000558556, CTAAAACCAGGTGATCGTGTGCCA  | intergenic            |
| 91069064  | 91078196  | AAGAAACAATGAAAGCCACAAGTT/                  | intergenic            |
| 14371996  | 14389013  | ENST00000446288 GTAGTAGTTTGCATCTATGGGATT   | intergenic            |
| 102323649 | 102332739 | CCTGGGTTGGGCTACTACTGCCTAT                  | natural antisense     |
| 20251894  | 20254219  | TTTCATTTATCCTTAATCCTTTTGCC                 | intergenic            |
| 102095320 | 102098867 | TAAGTAGCTGGTGTCTGGCAAGAGC                  | intergenic            |
| 141530254 | 141539600 | ACCTCCTTACATAACCCCTAACATGC                 | intergenic            |
| 37308280  | 37411701  | TCAGACTGAACTGGCAGACACTGCA                  | intergenic            |
| 52741846  | 52768602  | ENST00000416599 CTGCTATGGTTG/ 1374500      | intergenic            |
| 86831129  | 86845887  | CTGGAAAAATTAAGCAGGTGTCCTA                  | intronic antisense    |
| 86831129  | 86845887  | CTGGAAAAATTAAGCAGGTGTCCTA                  | natural antisense     |
| 86831129  | 86845887  | CTGGAAAAATTAAGCAGGTGTCCTA                  | natural antisense     |
| 86831129  | 86845887  | CTGGAAAAATTAAGCAGGTGTCCTA                  | natural antisense     |
| 138821686 | 139095813 | TGTGTCATATTCCAGCTCTCAGAGG                  | intergenic            |
| 200322422 | 200324615 | TTATTAGTTGCGTTGAGTCATCAGG                  | intronic antisense    |
| 200322422 | 200324615 | TTATTAGTTGCGTTGAGTCATCAGG                  | intronic antisense    |
| 200322422 | 200324615 | TTATTAGTTGCGTTGAGTCATCAGG                  | natural antisense     |
| 44410043  | 44411958  | ENST00000412378, ATTTCCGGAGGGAACATCCCAAAAC | bidirectional         |
| 151763317 | 151766878 | ENST00000533481 TTTCTGGAAAACATGAAATAGGCTT  | natural antisense     |
| 173835004 | 173836178 | AGTTGAAATGTT/ 60674                        | intergenic            |
| 32524944  | 32530475  | ATGGTAAAATGT/ 23658                        | exon sense-overlappi  |
| 32524944  | 32530475  | ATGGTAAAATGT/ 23658                        | exon sense-overlappi  |
| 32524944  | 32530475  | ATGGTAAAATGT/ 23658                        | exon sense-overlappi  |
| 9344858   | 9346352   | TGACTCAAGTCTCTTAAGGAAATTC                  | intergenic            |
| 63924579  | 63925933  | AAATGCTGGAGGTAAGAGCTTTGGC                  | intergenic            |
| 4543857   | 4712664   | CTGCATCTTTTTT 100507266                    | natural antisense     |
| 71251204  | 71257060  | NR_002185, NR_02 TCCATCCTTTTTT 79315       | intergenic            |

|                 |              |                       |   |           |           |
|-----------------|--------------|-----------------------|---|-----------|-----------|
| ENST00000539634 | TMEM75       | transmembrane prote   | - | 128959125 | 128960591 |
| NM_000984       | RPL23A       | 60S ribosomal protei  | + | 27046999  | 27051374  |
| NM_022068       | PIEZO2       | piezo-type mechanos   | - | 10670243  | 11148761  |
| NM_015306       | USP24        | ubiquitin carboxyl-te | - | 55532031  | 55681039  |
| NM_016034       | MRPS2        | 28S ribosomal protei  | + | 138392476 | 138396519 |
| ENST00000437510 | KCNMB2       | potassium large cond  | + | 177990719 | 178546150 |
| NM_001048199    | RCC1         | regulator of chromos  | + | 28832454  | 28865708  |
| NM_001003809    | DLGAP1       | disks large-associat  | - | 3496029   | 3845358   |
| NM_001242761    | DLGAP1       | disks large-associat  | - | 3502142   | 4455266   |
| NM_001242762    | DLGAP1       | disks large-associat  | - | 3496029   | 3874767   |
| NM_001242763    | DLGAP1       | disks large-associat  | - | 3496029   | 3874767   |
| NM_001242764    | DLGAP1       | disks large-associat  | - | 3496029   | 3874253   |
| NM_001242765    | DLGAP1       | disks large-associat  | - | 3502142   | 3845358   |
| NM_001242766    | DLGAP1       | disks large-associat  | - | 3496029   | 3845358   |
| NM_004746       | DLGAP1       | disks large-associat  | - | 3496029   | 4455266   |
| NM_001122770    | ZBTB37       | zinc finger and BTB   | + | 173837492 | 173855774 |
| NM_032522       | ZBTB37       | zinc finger and BTB   | + | 173837492 | 173842778 |
| NM_001010862    | SPIN3        | spindlin-3            | - | 57017263  | 57021988  |
| NM_001163       | APBA1        | amyloid beta A4 prec  | - | 72042448  | 72287275  |
| NM_017664       | ANKRD10      | ankyrin repeat domai  | - | 111530886 | 111567416 |
| NM_052932       | TMEM123      | porimin precursor     | - | 102267055 | 102323775 |
| NM_001198954    | RNF103-CHMP3 | RNF103-CHMP3 pro      | - | 86730552  | 86948245  |
| NM_001198951    | RNF103       | E3 ubiquitin-protein  | - | 86830515  | 86851000  |
| NM_001198952    | RNF103       | E3 ubiquitin-protein  | - | 86843539  | 86851000  |
| NM_005667       | RNF103       | E3 ubiquitin-protein  | - | 86830515  | 86851000  |
| NM_001172517    | SATB2        | DNA-binding proteir   | - | 200134222 | 200329831 |
| NM_015265       | SATB2        | DNA-binding proteir   | - | 200134222 | 200335989 |
| NM_001172509    | SATB2        | DNA-binding proteir   | - | 200134222 | 200322819 |
| NM_014652       | IPO13        | importin-13           | + | 44412477  | 44433694  |
| ENST00000368822 | TDRKH        | tudor and KH domain   | - | 151745969 | 151763892 |
| NM_001130710    | LSM5         | U6 snRNA-associate    | - | 32524944  | 32534870  |
| NM_001139499    | LSM5         | U6 snRNA-associate    | - | 32524944  | 32534870  |
| NM_012322       | LSM5         | U6 snRNA-associate    | - | 32524944  | 32530023  |
| ENST00000507908 | STX18        | syntaxin 18 [Source:] | - | 4426899   | 4544073   |

| 836.514728  | 129.864258  | 9.03652   | 7.192155  | 505.18335 | 378.03052 |
|-------------|-------------|-----------|-----------|-----------|-----------|
| 87.489687   | 28.864709   | 6.081648  | 5.057498  | 97.927086 | 94.02874  |
| 60.202827   | 10.704328   | 5.147191  | 3.642469  | 68.27582  | 112.0711  |
| 949.38715   | 264.827876  | 9.485556  | 7.967148  | 1050.2535 | 859.8863  |
| 32.873893   | 10.954887   | 4.673632  | 3.641279  | 37.753407 | 29.155264 |
| 227.441718  | 48.904981   | 7.35533   | 5.891549  | 245.46184 | 386.1449  |
| 481.512523  | 132.675847  | 8.44557   | 7.389077  | 380.17163 | 535.4661  |
| 1966.87597  | 184.38394   | 9.82043   | 5.791343  | 1589.3552 | 2147.3623 |
| 33.947156   | 10.905805   | 4.743489  | 3.604069  | 38.922237 | 34.812763 |
| 59.327736   | 18.137539   | 5.520439  | 4.325081  | 85.74362  | 56.309418 |
| 97.342739   | 9.431364    | 6.222347  | 3.157581  | 86.228836 | 85.556335 |
| 830.296093  | 169.080802  | 9.131996  | 7.675229  | 529.00037 | 466.9964  |
| 2384.336383 | 577.588245  | 10.744199 | 9.479109  | 2341.3035 | 3153.543  |
| 45.844269   | 12.774654   | 4.993935  | 3.906981  | 74.10812  | 76.15251  |
| 250.812137  | 32.423743   | 6.919065  | 5.094871  | 345.8599  | 245.14085 |
| 411.905472  | 109.598237  | 8.230152  | 7.108868  | 398.85773 | 570.9746  |
| 32.739294   | 5.322697    | 4.64493   | 2.559896  | 38.420845 | 32.467857 |
| 32.739294   | 5.322697    | 4.64493   | 2.559896  | 38.420845 | 32.467857 |
| 32.739294   | 5.322697    | 4.64493   | 2.559896  | 38.420845 | 32.467857 |
| 32.739294   | 5.322697    | 4.64493   | 2.559896  | 38.420845 | 32.467857 |
| 32.739294   | 5.322697    | 4.64493   | 2.559896  | 38.420845 | 32.467857 |
| 32.739294   | 5.322697    | 4.64493   | 2.559896  | 38.420845 | 32.467857 |
| 32.739294   | 5.322697    | 4.64493   | 2.559896  | 38.420845 | 32.467857 |
| 32.739294   | 5.322697    | 4.64493   | 2.559896  | 38.420845 | 32.467857 |
| 936.326183  | 185.013568  | 9.411399  | 7.839188  | 1240.7761 | 1347.5784 |
| 913.435357  | 130.899879  | 9.412524  | 7.316125  | 918.9117  | 981.72144 |
| 913.435357  | 130.899879  | 9.412524  | 7.316125  | 918.9117  | 981.72144 |
| 188.2541    | 45.664229   | 7.196969  | 5.797202  | 205.89844 | 165.08519 |
| 133.805927  | 24.882243   | 6.53762   | 4.930764  | 149.11726 | 207.64505 |
| 111.472028  | 33.346912   | 6.40367   | 5.33378   | 165.9263  | 82.69084  |
| 761.971405  | 63.916325   | 9.063842  | 6.264528  | 668.7228  | 426.64426 |
| 39.623277   | 11.278988   | 4.746718  | 3.588985  | 46.45542  | 29.849094 |
| 406.065853  | 134.810156  | 8.259907  | 6.689222  | 406.24155 | 473.4276  |
| 584.682132  | 145.580207  | 8.658392  | 7.292197  | 566.17096 | 216.42099 |
| 26.108835   | 7.465683    | 4.053614  | 3.015588  | 41.487553 | 57.57049  |
| 307.957783  | 62.336545   | 7.866223  | 6.276656  | 354.74094 | 415.45114 |
| 85.527377   | 25.257029   | 6.011344  | 4.819715  | 99.003685 | 135.81952 |
| 49.450386   | 7.970721    | 4.923924  | 3.018403  | 23.071936 | 9.796665  |
| 1137.067583 | 337.936195  | 9.714034  | 8.679777  | 1328.8146 | 1249.182  |
| 20.48518    | 6.045375    | 3.951572  | 2.67945   | 24.751976 | 13.592128 |
| 110.587801  | 20.141164   | 6.213126  | 4.630575  | 144.92719 | 225.7964  |
| 20088.79967 | 4372.049233 | 13.842653 | 12.507427 | 21927.998 | 12805.145 |
| 34.993987   | 5.798708    | 4.781251  | 2.66883   | 32.191254 | 25.478743 |
| 128.424107  | 29.274214   | 6.606376  | 4.796461  | 146.1815  | 85.86514  |
| 29.285924   | 8.842498    | 4.288205  | 2.93961   | 64.92344  | 34.382328 |
| 29.285924   | 8.842498    | 4.288205  | 2.93961   | 64.92344  | 34.382328 |
| 29.285924   | 8.842498    | 4.288205  | 2.93961   | 64.92344  | 34.382328 |
| 29.285924   | 8.842498    | 4.288205  | 2.93961   | 64.92344  | 34.382328 |
| 30.966804   | 8.19138     | 4.563122  | 3.120978  | 35.623245 | 37.74295  |
| 1690.203543 | 452.298735  | 10.238618 | 8.969852  | 2069.2354 | 2245.0667 |
| 1690.203543 | 452.298735  | 10.238618 | 8.969852  | 2069.2354 | 2245.0667 |
| 1690.203543 | 452.298735  | 10.238618 | 8.969852  | 2069.2354 | 2245.0667 |
| 261.996325  | 53.14698    | 7.636064  | 6.05162   | 251.81653 | 292.3002  |
| 68.329467   | 15.734986   | 5.748231  | 4.195038  | 61.606358 | 58.470306 |
| 321.897778  | 81.051374   | 7.893586  | 6.648391  | 288.7039  | 251.7086  |
| 87.907721   | 13.637705   | 6.084824  | 3.653513  | 92.66182  | 72.78077  |
| 87.907721   | 13.637705   | 6.084824  | 3.653513  | 92.66182  | 72.78077  |
| 87.907721   | 13.637705   | 6.084824  | 3.653513  | 92.66182  | 72.78077  |
| 44.400163   | 12.516578   | 5.086873  | 3.713375  | 42.623695 | 36.98664  |
| 21.450793   | 6.697419    | 4.072775  | 2.697309  | 23.25398  | 20.073362 |
| 473.106722  | 111.86184   | 8.338178  | 6.954183  | 580.64703 | 492.2459  |
| 703.620282  | 144.722189  | 8.770584  | 7.4172    | 532.9557  | 184.37671 |

| 616.279   | 1944.0717 | 382.1763   | 1193.3475  | 71.75444  | 54.03355   |
|-----------|-----------|------------|------------|-----------|------------|
| 86.95536  | 58.191143 | 88.33726   | 99.498535  | 22.398779 | 13.753479  |
| 14.611287 | 101.94587 | 12.54428   | 51.768604  | 8.374387  | 9.391659   |
| 1128.3287 | 758.4317  | 840.9652   | 1058.4575  | 274.3712  | 55.689526  |
| 49.572735 | 34.288918 | 19.65385   | 26.819185  | 16.709618 | 9.799296   |
| 101.01511 | 175.72478 | 224.73595  | 231.56773  | 53.02958  | 34.129288  |
| 245.96413 | 746.662   | 378.97128  | 601.84     | 116.2659  | 122.39691  |
| 569.6472  | 126.64312 | 4791.099   | 2577.149   | 240.71153 | 70.22773   |
| 41.931755 | 25.704584 | 29.626913  | 32.684685  | 10.251381 | 5.317704   |
| 58.724525 | 41.365227 | 60.364418  | 53.459206  | 12.19194  | 6.9922247  |
| 83.16804  | 72.485435 | 123.137886 | 133.4799   | 11.79304  | 4.9999995  |
| 551.50134 | 1534.5552 | 543.31055  | 1356.4127  | 140.31696 | 73.84108   |
| 1291.216  | 2906.609  | 1917.8693  | 2695.4775  | 428.26108 | 348.39545  |
| 49.8272   | 30.99699  | 17.489193  | 26.491604  | 13.979941 | 12.339061  |
| 345.49246 | 4.9999995 | 325.26944  | 238.11017  | 39.109463 | 15.785018  |
| 224.85512 | 258.9052  | 513.50934  | 504.33084  | 122.90632 | 132.2966   |
| 40.092106 | 16.93531  | 32.21416   | 36.305485  | 5.3666525 | 4.9999995  |
| 40.092106 | 16.93531  | 32.21416   | 36.305485  | 5.3666525 | 4.9999995  |
| 40.092106 | 16.93531  | 32.21416   | 36.305485  | 5.3666525 | 4.9999995  |
| 40.092106 | 16.93531  | 32.21416   | 36.305485  | 5.3666525 | 4.9999995  |
| 40.092106 | 16.93531  | 32.21416   | 36.305485  | 5.3666525 | 4.9999995  |
| 40.092106 | 16.93531  | 32.21416   | 36.305485  | 5.3666525 | 4.9999995  |
| 40.092106 | 16.93531  | 32.21416   | 36.305485  | 5.3666525 | 4.9999995  |
| 40.092106 | 16.93531  | 32.21416   | 36.305485  | 5.3666525 | 4.9999995  |
| 887.836   | 819.1762  | 528.7182   | 793.8722   | 166.18831 | 229.28925  |
| 812.1985  | 1205.8599 | 575.2104   | 986.7102   | 107.11341 | 84.575714  |
| 812.1985  | 1205.8599 | 575.2104   | 986.7102   | 107.11341 | 84.575714  |
| 213.24818 | 200.17767 | 144.529    | 200.58612  | 39.089176 | 35.614876  |
| 58.06603  | 59.712025 | 178.8266   | 149.4686   | 22.88791  | 28.749172  |
| 143.50508 | 85.98903  | 89.366325  | 101.35459  | 25.674273 | 18.78721   |
| 889.4203  | 376.56747 | 1157.1407  | 1053.3329  | 44.17524  | 43.96116   |
| 94.95693  | 27.976532 | 16.355467  | 22.146217  | 7.649676  | 7.907024   |
| 336.53735 | 273.5584  | 459.94904  | 486.68118  | 51.57739  | 34.713696  |
| 894.02454 | 807.6349  | 344.4446   | 679.3968   | 185.91156 | 55.693592  |
| 13.21485  | 7.5580926 | 16.38717   | 20.434855  | 9.390466  | 10.214792  |
| 227.56606 | 312.06683 | 228.96149  | 308.96024  | 58.60884  | 42.855465  |
| 69.98766  | 57.635395 | 75.33459   | 75.38341   | 24.311165 | 12.6011    |
| 31.625261 | 44.352028 | 84.85564   | 103.000786 | 7.2114406 | 7.616641   |
| 1303.364  | 1252.987  | 626.2331   | 1061.8248  | 239.64209 | 186.83691  |
| 15.934309 | 40.232445 | 12.402941  | 15.997279  | 8.209423  | 4.9999995  |
| 34.453594 | 88.35486  | 77.36935   | 92.62541   | 17.339079 | 22.90287   |
| 29523.848 | 20760.9   | 15045.005  | 20469.902  | 3923.671  | 3508.8     |
| 29.76082  | 33.80381  | 46.840374  | 41.888924  | 5.5034714 | 4.9999995  |
| 192.27019 | 131.0838  | 84.543915  | 130.6001   | 36.933002 | 9.436285   |
| 22.104607 | 8.904611  | 25.960289  | 19.44027   | 10.59582  | 4.9999995  |
| 22.104607 | 8.904611  | 25.960289  | 19.44027   | 10.59582  | 4.9999995  |
| 22.104607 | 8.904611  | 25.960289  | 19.44027   | 10.59582  | 4.9999995  |
| 22.104607 | 8.904611  | 25.960289  | 19.44027   | 10.59582  | 4.9999995  |
| 17.46114  | 22.48445  | 38.30351   | 34.18553   | 10.487001 | 4.9999995  |
| 1401.927  | 809.67206 | 1818.8499  | 1796.4702  | 447.5918  | 176.50122  |
| 1401.927  | 809.67206 | 1818.8499  | 1796.4702  | 447.5918  | 176.50122  |
| 1401.927  | 809.67206 | 1818.8499  | 1796.4702  | 447.5918  | 176.50122  |
| 192.0003  | 189.08392 | 337.3753   | 309.4017   | 42.9286   | 51.577305  |
| 60.54177  | 82.62115  | 66.41173   | 80.32549   | 14.011793 | 11.356819  |
| 303.67667 | 528.219   | 189.31342  | 369.76508  | 77.27944  | 51.479935  |
| 125.81034 | 91.49616  | 60.79145   | 83.905785  | 14.363599 | 5.6327343  |
| 125.81034 | 91.49616  | 60.79145   | 83.905785  | 14.363599 | 5.6327343  |
| 125.81034 | 91.49616  | 60.79145   | 83.905785  | 14.363599 | 5.6327343  |
| 42.16571  | 27.605673 | 61.433765  | 55.585495  | 8.798902  | 10.5014305 |
| 15.7268   | 18.339588 | 29.958755  | 21.352276  | 4.9999995 | 4.9999995  |
| 660.0791  | 574.73566 | 125.56612  | 405.36652  | 124.46359 | 48.696472  |
| 817.5101  | 286.29388 | 1289.8186  | 1110.7667  | 117.33602 | 51.639034  |



| 89.860695  | 251.53954 | 137.4392   | 174.55812 | 8.497623  | 8.268949   |
|------------|-----------|------------|-----------|-----------|------------|
| 35.8889    | 21.653921 | 45.453545  | 34.039627 | 6.1648808 | 6.3426485  |
| 14.767902  | 15.991221 | 6.226704   | 9.474096  | 5.632655  | 6.589115   |
| 521.50244  | 73.73736  | 459.17712  | 204.48961 | 9.563779  | 9.410531   |
| 15.245411  | 10.87136  | 7.8538     | 5.2498355 | 4.774437  | 4.80267    |
| 58.895226  | 33.83976  | 67.97535   | 45.560684 | 7.484921  | 8.300746   |
| 122.12621  | 121.52842 | 185.81757  | 127.92007 | 8.110435  | 8.755491   |
| 757.50525  | 4.9999995 | 27.487204  | 5.371927  | 10.166045 | 10.6527195 |
| 20.530073  | 8.191839  | 9.531383   | 11.612451 | 4.818328  | 5.037894   |
| 25.525162  | 18.044476 | 29.647434  | 16.424    | 5.9681554 | 5.663059   |
| 18.940012  | 4.9999995 | 4.9999995  | 10.855131 | 5.9762087 | 6.221996   |
| 182.46591  | 212.9865  | 236.21425  | 168.66011 | 8.561582  | 8.5586     |
| 522.707    | 532.1921  | 1032.0411  | 601.93274 | 10.717249 | 11.208283  |
| 20.003258  | 8.034113  | 10.22693   | 12.064621 | 5.756035  | 6.0636916  |
| 68.608986  | 13.748491 | 33.161797  | 24.128704 | 7.9818645 | 7.671328   |
| 117.47238  | 98.74463  | 99.30269   | 86.8668   | 8.183573  | 8.848739   |
| 5.3019505  | 4.9999995 | 6.267582   | 4.9999995 | 4.798562  | 4.9461308  |
| 5.3019505  | 4.9999995 | 6.267582   | 4.9999995 | 4.798562  | 4.9461308  |
| 5.3019505  | 4.9999995 | 6.267582   | 4.9999995 | 4.798562  | 4.9461308  |
| 5.3019505  | 4.9999995 | 6.267582   | 4.9999995 | 4.798562  | 4.9461308  |
| 5.3019505  | 4.9999995 | 6.267582   | 4.9999995 | 4.798562  | 4.9461308  |
| 5.3019505  | 4.9999995 | 6.267582   | 4.9999995 | 4.798562  | 4.9461308  |
| 5.3019505  | 4.9999995 | 6.267582   | 4.9999995 | 4.798562  | 4.9461308  |
| 5.3019505  | 4.9999995 | 6.267582   | 4.9999995 | 4.798562  | 4.9461308  |
| 5.3019505  | 4.9999995 | 6.267582   | 4.9999995 | 4.798562  | 4.9461308  |
| 105.921486 | 280.25812 | 163.46057  | 164.96367 | 9.799103  | 10.03167   |
| 135.98909  | 107.45928 | 223.96794  | 126.29384 | 9.375414  | 9.5945215  |
| 135.98909  | 107.45928 | 223.96794  | 126.29384 | 9.375414  | 9.5945215  |
| 49.4664    | 35.357975 | 71.72345   | 42.733498 | 7.232593  | 7.1254773  |
| 19.961082  | 32.397495 | 26.63965   | 18.65815  | 6.764688  | 7.444423   |
| 37.70992   | 44.78749  | 32.831448  | 40.29113  | 6.91716   | 6.174479   |
| 50.966618  | 59.203846 | 107.205284 | 77.9858   | 8.915527  | 8.427277   |
| 19.574883  | 4.9999995 | 17.9929    | 9.549443  | 5.0787997 | 4.83372    |
| 64.0267    | 31.30729  | 438.30292  | 188.93294 | 8.206002  | 8.579478   |
| 316.92752  | 97.41734  | 137.98595  | 79.54528  | 8.665215  | 7.5003695  |
| 10.188839  | 4.9999995 | 4.9999995  | 4.9999995 | 4.9119267 | 5.6922636  |
| 84.79743   | 61.923885 | 66.52263   | 59.31102  | 8.016042  | 8.39285    |
| 50.838333  | 25.607439 | 20.94156   | 17.242577 | 6.1781454 | 6.8519626  |
| 4.9999995  | 17.996248 | 4.9999995  | 4.9999995 | 4.0655284 | 3.3751245  |
| 284.9839   | 338.76553 | 594.89044  | 382.4983  | 9.91113   | 9.925661   |
| 5.451557   | 7.6112695 | 4.9999995  | 4.9999995 | 4.171854  | 3.8023777  |
| 19.355122  | 23.476904 | 22.200127  | 15.572879 | 6.7255154 | 7.562858   |
| 4508.6274  | 5255.198  | 4693.1274  | 4342.8716 | 13.968516 | 13.18249   |
| 4.9999995  | 4.9999995 | 7.363721   | 6.9250584 | 4.547674  | 4.623199   |
| 75.99122   | 13.65938  | 20.658619  | 18.96678  | 6.7364388 | 6.2267313  |
| 22.459167  | 4.9999995 | 4.9999995  | 4.9999995 | 5.5615935 | 5.0220647  |
| 22.459167  | 4.9999995 | 4.9999995  | 4.9999995 | 5.5615935 | 5.0220647  |
| 22.459167  | 4.9999995 | 4.9999995  | 4.9999995 | 5.5615935 | 5.0220647  |
| 22.459167  | 4.9999995 | 4.9999995  | 4.9999995 | 5.5615935 | 5.0220647  |
| 13.93196   | 5.697343  | 7.0501475  | 6.981827  | 4.6922035 | 5.1426387  |
| 1052.2054  | 309.71152 | 428.949    | 298.83347 | 10.536766 | 10.713436  |
| 1052.2054  | 309.71152 | 428.949    | 298.83347 | 10.536766 | 10.713436  |
| 1052.2054  | 309.71152 | 428.949    | 298.83347 | 10.536766 | 10.713436  |
| 43.04674   | 60.33093  | 70.848015  | 50.15029  | 7.5190434 | 7.9217434  |
| 14.52427   | 10.4024   | 27.598804  | 16.515827 | 5.4874926 | 5.710718   |
| 112.423805 | 79.44754  | 88.61884   | 77.058685 | 7.720291  | 7.7092113  |
| 36.524765  | 11.16819  | 4.9999995  | 9.136941  | 6.085165  | 6.002578   |
| 36.524765  | 11.16819  | 4.9999995  | 9.136941  | 6.085165  | 6.002578   |
| 36.524765  | 11.16819  | 4.9999995  | 9.136941  | 6.085165  | 6.002578   |
| 30.970058  | 8.111739  | 8.969066   | 7.748272  | 4.9528174 | 5.1142926  |
| 13.249782  | 6.934732  | 4.9999995  | 4.9999995 | 4.0762877 | 4.3039985  |
| 222.58066  | 65.72781  | 134.83911  | 74.8634   | 8.705375  | 8.63079    |
| 180.07262  | 170.35199 | 194.69731  | 154.23616 | 8.571802  | 7.285914   |

| 8.894337  | 10.595957 | 8.321607  | 9.64065   | 6.3971715 | 6.604294  |
|-----------|-----------|-----------|-----------|-----------|-----------|
| 6.1269917 | 5.480972  | 6.258562  | 6.1158304 | 4.7231193 | 4.585809  |
| 3.5454535 | 6.321778  | 3.5886724 | 5.205475  | 3.273707  | 4.006923  |
| 9.764     | 9.26024   | 9.454134  | 9.46065   | 8.360149  | 6.651796  |
| 5.3151608 | 4.661604  | 4.19898   | 4.2889414 | 4.294446  | 4.074335  |
| 6.3390436 | 7.1333995 | 7.564148  | 7.30972   | 5.964088  | 5.932051  |
| 7.6118402 | 9.235538  | 8.308131  | 8.651986  | 7.0992684 | 7.78406   |
| 8.793183  | 6.654048  | 11.920902 | 10.73568  | 8.168179  | 6.9815273 |
| 5.069659  | 4.213138  | 4.7473097 | 4.5746036 | 3.58381   | 3.144012  |
| 5.5609856 | 4.954214  | 5.7259383 | 5.25028   | 3.8373413 | 3.5682375 |
| 6.060545  | 5.8176103 | 6.7237515 | 6.533968  | 3.7890573 | 2.4279919 |
| 8.749801  | 10.269084 | 8.832876  | 9.820034  | 7.3613663 | 7.051773  |
| 9.972047  | 11.164158 | 10.606932 | 10.796526 | 9.003152  | 9.3150625 |
| 5.3222795 | 4.5089884 | 4.042925  | 4.2696924 | 4.031591  | 4.4201493 |
| 8.0946    | 2.3221264 | 8.0933895 | 7.3510795 | 5.521658  | 4.7992864 |
| 7.4899263 | 7.7054634 | 8.748426  | 8.404782  | 7.174183  | 7.8976955 |
| 5.008727  | 3.5339692 | 4.865244  | 4.716948  | 2.6300874 | 2.4279919 |
| 5.008727  | 3.5339692 | 4.865244  | 4.716948  | 2.6300874 | 2.4279919 |
| 5.008727  | 3.5339692 | 4.865244  | 4.716948  | 2.6300874 | 2.4279919 |
| 5.008727  | 3.5339692 | 4.865244  | 4.716948  | 2.6300874 | 2.4279919 |
| 5.008727  | 3.5339692 | 4.865244  | 4.716948  | 2.6300874 | 2.4279919 |
| 5.008727  | 3.5339692 | 4.865244  | 4.716948  | 2.6300874 | 2.4279919 |
| 5.008727  | 3.5339692 | 4.865244  | 4.716948  | 2.6300874 | 2.4279919 |
| 5.008727  | 3.5339692 | 4.865244  | 4.716948  | 2.6300874 | 2.4279919 |
| 5.008727  | 3.5339692 | 4.865244  | 4.716948  | 2.6300874 | 2.4279919 |
| 9.428208  | 9.363692  | 8.79198   | 9.05374   | 7.6226    | 8.694846  |
| 9.311349  | 9.920622  | 8.912669  | 9.360567  | 6.9798174 | 7.2533555 |
| 9.311349  | 9.920622  | 8.912669  | 9.360567  | 6.9798174 | 7.2533555 |
| 7.4197674 | 7.327385  | 6.9564524 | 7.12014   | 5.520661  | 5.998509  |
| 5.545674  | 5.520396  | 7.254458  | 6.6960816 | 4.7558317 | 5.6835895 |
| 6.8414755 | 6.0714536 | 6.2740397 | 6.1434126 | 4.926239  | 5.05281   |
| 9.430864  | 8.236768  | 9.915837  | 9.4567795 | 5.698315  | 6.3046255 |
| 6.2479644 | 4.3412256 | 3.955556  | 4.0230412 | 3.1308587 | 3.7448554 |
| 8.060533  | 7.7751064 | 8.586667  | 8.351657  | 5.9241323 | 5.9573283 |
| 9.441317  | 9.341576  | 8.171133  | 8.830743  | 7.786166  | 6.651963  |
| 3.3966525 | 2.4451997 | 3.957456  | 3.9181871 | 3.447054  | 4.135071  |
| 7.50675   | 7.9639835 | 7.5943546 | 7.72336   | 6.1091213 | 6.267876  |
| 5.816922  | 5.4655304 | 6.0297003 | 5.7258043 | 4.844914  | 4.454622  |
| 4.673996  | 5.060999  | 6.2007833 | 6.167113  | 3.0429091 | 3.6886053 |
| 9.9883175 | 9.97336   | 9.021271  | 9.464466  | 8.158214  | 8.398788  |
| 3.6750293 | 4.910768  | 3.5722787 | 3.5771267 | 3.2412121 | 2.4279919 |
| 4.793169  | 6.1118073 | 6.0700817 | 6.015326  | 4.3543115 | 5.345284  |
| 14.557114 | 14.03268  | 13.594554 | 13.720564 | 12.236178 | 12.683071 |
| 4.586735  | 4.639167  | 5.381213  | 4.909521  | 2.662697  | 2.4279919 |
| 7.268386  | 6.7052193 | 6.196307  | 6.5051737 | 5.444116  | 4.0140476 |
| 4.153712  | 2.5621135 | 4.580166  | 3.849578  | 3.632964  | 2.4279919 |
| 4.153712  | 2.5621135 | 4.580166  | 3.849578  | 3.632964  | 2.4279919 |
| 4.153712  | 2.5621135 | 4.580166  | 3.849578  | 3.632964  | 2.4279919 |
| 4.153712  | 2.5621135 | 4.580166  | 3.849578  | 3.632964  | 2.4279919 |
| 3.8056703 | 3.9955504 | 5.1060743 | 4.636594  | 3.6180618 | 2.4279919 |
| 10.082535 | 9.345686  | 10.533146 | 10.220142 | 9.066629  | 8.305659  |
| 10.082535 | 9.345686  | 10.533146 | 10.220142 | 9.066629  | 8.305659  |
| 10.082535 | 9.345686  | 10.533146 | 10.220142 | 9.066629  | 8.305659  |
| 7.2651157 | 7.2413    | 8.1443205 | 7.72486   | 5.658372  | 6.5372953 |
| 5.6091385 | 6.012456  | 5.8547955 | 5.814785  | 4.035068  | 4.2967763 |
| 7.9133534 | 8.726166  | 7.3294683 | 7.9630256 | 6.495064  | 6.534383  |
| 6.651796  | 6.1626234 | 5.735355  | 5.871429  | 4.07252   | 3.2301643 |
| 6.651796  | 6.1626234 | 5.735355  | 5.871429  | 4.07252   | 3.2301643 |
| 6.651796  | 6.1626234 | 5.735355  | 5.871429  | 4.07252   | 3.2301643 |
| 5.0758295 | 4.3236876 | 5.749824  | 5.3047853 | 3.3494494 | 4.179638  |
| 3.654105  | 3.6609128 | 4.7650294 | 3.9763172 | 2.3467326 | 2.4279919 |
| 9.001109  | 8.848739  | 6.7508183 | 8.0922365 | 7.191397  | 6.4540367 |
| 9.322625  | 7.844609  | 10.064374 | 9.53418   | 7.111969  | 6.539441  |

| 6.4582605 | 8.401984  | 7.3399906 | 7.951232  |
|-----------|-----------|-----------|-----------|
| 5.1691947 | 4.6034703 | 5.7743945 | 5.489002  |
| 3.9514565 | 4.141452  | 2.9529572 | 3.528316  |
| 8.980853  | 6.524727  | 9.084449  | 8.200914  |
| 3.9939806 | 3.5501282 | 3.2686865 | 2.6661005 |
| 5.866482  | 5.302248  | 6.353612  | 5.9308124 |
| 6.8937016 | 7.283399  | 7.7867117 | 7.487323  |
| 9.509842  | 2.3408759 | 5.054576  | 2.6930597 |
| 4.4006376 | 3.1229177 | 3.538158  | 3.834876  |
| 4.6980534 | 4.3175263 | 5.168108  | 4.3612223 |
| 4.2922525 | 2.3408759 | 2.3618152 | 3.733494  |
| 7.4622574 | 8.142045  | 8.13574   | 7.898191  |
| 8.984613  | 9.514803  | 10.271769 | 9.785257  |
| 4.3666906 | 3.0954673 | 3.6336277 | 3.894363  |
| 6.0774426 | 3.9040053 | 5.323045  | 4.9437895 |
| 6.8368106 | 6.9654326 | 6.8895445 | 6.8895445 |
| 2.6458135 | 2.3408759 | 2.9618556 | 2.352752  |
| 2.6458135 | 2.3408759 | 2.9618556 | 2.352752  |
| 2.6458135 | 2.3408759 | 2.9618556 | 2.352752  |
| 2.6458135 | 2.3408759 | 2.9618556 | 2.352752  |
| 2.6458135 | 2.3408759 | 2.9618556 | 2.352752  |
| 2.6458135 | 2.3408759 | 2.9618556 | 2.352752  |
| 2.6458135 | 2.3408759 | 2.9618556 | 2.352752  |
| 2.6458135 | 2.3408759 | 2.9618556 | 2.352752  |
| 2.6458135 | 2.3408759 | 2.9618556 | 2.352752  |
| 6.691194  | 8.570687  | 7.5843334 | 7.871467  |
| 7.0427375 | 7.093479  | 8.062209  | 7.465149  |
| 7.0427375 | 7.093479  | 8.062209  | 7.465149  |
| 5.62692   | 5.373929  | 6.4281397 | 5.8350544 |
| 4.3632574 | 5.228952  | 5.0058284 | 4.547125  |
| 5.2382026 | 5.736881  | 5.3066463 | 5.7419    |
| 5.6655035 | 6.1775827 | 7.000608  | 6.740534  |
| 4.3367057 | 2.3408759 | 4.4402013 | 3.5404134 |
| 5.9831204 | 5.180651  | 9.0156355 | 8.074465  |
| 8.259554  | 6.941948  | 7.3447433 | 6.7688084 |
| 3.4559624 | 2.3408759 | 2.3618152 | 2.352752  |
| 6.373998  | 6.2511463 | 6.3251686 | 6.3326244 |
| 5.662679  | 4.8692756 | 4.6556425 | 4.4311585 |
| 2.350709  | 4.313629  | 2.3618152 | 2.352752  |
| 8.099115  | 8.851284  | 9.450988  | 9.120272  |
| 2.675927  | 3.017004  | 2.3618152 | 2.352752  |
| 4.321811  | 4.735638  | 4.744484  | 4.281919  |
| 12.118268 | 12.845834 | 12.487051 | 12.674161 |
| 2.350709  | 2.3408759 | 3.1792796 | 3.051425  |
| 6.21671   | 3.8956127 | 4.6343026 | 4.5739746 |
| 4.5212617 | 2.3408759 | 2.3618152 | 2.352752  |
| 4.5212617 | 2.3408759 | 2.3618152 | 2.352752  |
| 4.5212617 | 2.3408759 | 2.3618152 | 2.352752  |
| 4.5212617 | 2.3408759 | 2.3618152 | 2.352752  |
| 3.8737085 | 2.623707  | 3.1187534 | 3.0636473 |
| 9.977817  | 8.72662   | 8.981082  | 8.761304  |
| 9.977817  | 8.72662   | 8.981082  | 8.761304  |
| 9.977817  | 8.72662   | 8.981082  | 8.761304  |
| 5.4234524 | 6.2056823 | 6.409084  | 6.075832  |
| 3.92721   | 3.4819586 | 5.0602994 | 4.3689175 |
| 6.776666  | 6.6380076 | 6.722672  | 6.723552  |
| 5.1931844 | 3.5921187 | 2.3618152 | 3.4712727 |
| 5.1931844 | 3.5921187 | 2.3618152 | 3.4712727 |
| 5.1931844 | 3.5921187 | 2.3618152 | 3.4712727 |
| 4.968224  | 3.1089723 | 3.4504693 | 3.2234952 |
| 3.8030305 | 2.8915336 | 2.3618152 | 2.352752  |
| 7.740992  | 6.3430276 | 7.318266  | 6.67738   |
| 7.4448066 | 7.786166  | 7.851634  | 7.769183  |

|               |             |             |           |    |           |
|---------------|-------------|-------------|-----------|----|-----------|
| ASHGA5P032274 | 0.013032318 | 0.069856339 | 2.3337862 | up | noncoding |
| ASHGA5P026228 | 0.033493999 | 0.115418598 | 2.4718196 | up | noncoding |
| ASHGA5P036099 | 2.14807E-05 | 0.005043652 | 2.3995986 | up | noncoding |
| ASHGA5P043445 | 0.004303512 | 0.041611144 | 2.8611717 | up | noncoding |
| ASHGA5P054840 | 0.010165093 | 0.062488634 | 2.3276176 | up | noncoding |
| ASHGA5P020601 | 0.001826841 | 0.02866799  | 2.2510834 | up | noncoding |
| ASHGA5P044381 | 0.001737545 | 0.027815258 | 2.5550818 | up | noncoding |
| ASHGA5P017889 | 0.017168631 | 0.079799097 | 2.9037718 | up | noncoding |
| ASHGA5P017889 | 0.017168631 | 0.079799097 | 2.9037718 | up | noncoding |
| ASHGA5P017889 | 0.017168631 | 0.079799097 | 2.9037718 | up | noncoding |
| ASHGA5P017889 | 0.017168631 | 0.079799097 | 2.9037718 | up | noncoding |
| ASHGA5P015403 | 0.011394598 | 0.065655489 | 2.7828953 | up | noncoding |
| ASHGA5P015191 | 2.52666E-05 | 0.005206419 | 2.4887292 | up | noncoding |
| ASHGA5P050656 | 0.012665523 | 0.068811258 | 2.4902912 | up | noncoding |
| ASHGA5P043479 | 1.26335E-05 | 0.004261616 | 2.4016576 | up | noncoding |
| ASHGA5P034812 | 0.012978822 | 0.069832275 | 2.013277  | up | noncoding |
| ASHGA5P038136 | 0.001393964 | 0.025029174 | 2.430003  | up | noncoding |
| ASHGA5P033306 | 0.000647953 | 0.017096671 | 2.7261633 | up | noncoding |
| ASHGA5P000036 | 0.005414185 | 0.046810253 | 2.1060934 | up | noncoding |
| ASHGA5P047996 | 0.005746881 | 0.048170833 | 8.2507483 | up | noncoding |
| ASHGA5P036258 | 1.10965E-05 | 0.004010044 | 2.6559998 | up | noncoding |
| ASHGA5P041295 | 0.00238863  | 0.031905667 | 2.2322738 | up | noncoding |
| ASHGA5P043490 | 0.000472078 | 0.015197114 | 5.5270853 | up | noncoding |
| ASHGA5P023709 | 0.006940886 | 0.052901715 | 2.1290861 | up | noncoding |
| ASHGA5P033399 | 0.000384067 | 0.014011107 | 7.6429028 | up | noncoding |
| ASHGA5P015330 | 0.000511744 | 0.015567285 | 2.583859  | up | noncoding |
| ASHGA5P042183 | 0.000554952 | 0.016097331 | 3.3573274 | up | noncoding |
| ASHGA5P030284 | 0.023210506 | 0.09436573  | 4.3668823 | up | noncoding |
| ASHGA5P037898 | 0.008927988 | 0.058937658 | 2.0899839 | up | noncoding |
| ASHGA5P030309 | 0.001645143 | 0.027211232 | 4.1743029 | up | noncoding |
| ASHGA5P031058 | 0.000319877 | 0.012936329 | 3.6730517 | up | noncoding |
| ASHGA5P031058 | 0.000319877 | 0.012936329 | 3.6730517 | up | noncoding |
| ASHGA5P028122 | 0.011277818 | 0.065455073 | 2.2637814 | up | noncoding |
| ASHGA5P018325 | 0.028251748 | 0.104954123 | 6.7333094 | up | noncoding |
| ASHGA5P039131 | 0.008251199 | 0.056900112 | 2.4947726 | up | noncoding |
| ASHGA5P056248 | 0.041786307 | 0.130815553 | 2.6018198 | up | noncoding |
| ASHGA5P054984 | 0.004133046 | 0.041062628 | 3.1553104 | up | noncoding |
| ASHGA5P044811 | 0.000596161 | 0.016430598 | 2.1608636 | up | noncoding |
| ASHGA5P047804 | 0.01137833  | 0.065649171 | 2.1714267 | up | noncoding |
| ASHGA5P045129 | 0.018184254 | 0.081962493 | 2.5564556 | up | noncoding |
| ASHGA5P036921 | 0.013670431 | 0.071680418 | 3.0996092 | up | noncoding |
| ASHGA5P056533 | 0.006149681 | 0.050044579 | 3.0818061 | up | noncoding |
| ASHGA5P042878 | 0.003487684 | 0.038135018 | 2.4067762 | up | noncoding |
| ASHGA5P035813 | 0.002284109 | 0.031352605 | 2.3294987 | up | noncoding |
| ASHGA5P035813 | 0.002284109 | 0.031352605 | 2.3294987 | up | noncoding |
| ASHGA5P035813 | 0.002284109 | 0.031352605 | 2.3294987 | up | noncoding |
| ASHGA5P035813 | 0.002284109 | 0.031352605 | 2.3294987 | up | noncoding |
| ASHGA5P016554 | 7.48133E-05 | 0.008283845 | 3.2803919 | up | noncoding |
| ASHGA5P016554 | 7.48133E-05 | 0.008283845 | 3.2803919 | up | noncoding |
| ASHGA5P016554 | 7.48133E-05 | 0.008283845 | 3.2803919 | up | noncoding |
| ASHGA5P014628 | 0.007296089 | 0.053739578 | 2.0946521 | up | noncoding |
| ASHGA5P049689 | 2.7424E-05  | 0.005394108 | 2.0514272 | up | noncoding |
| ASHGA5P044274 | 0.008764831 | 0.058350177 | 2.1444457 | up | noncoding |
| ASHGA5P043050 | 0.000562061 | 0.016101946 | 4.2267441 | up | noncoding |
| ASHGA5P032571 | 3.29085E-05 | 0.005933463 | 5.4093962 | up | noncoding |
| ASHGA5P028564 | 0.017007109 | 0.079410859 | 3.2122168 | up | noncoding |
| ASHGA5P019960 | 0.034552007 | 0.117566482 | 2.0350908 | up | noncoding |
| ASHGA5P019960 | 0.034552007 | 0.117566482 | 2.0350908 | up | noncoding |
| ASHGA5P049516 | 0.004307973 | 0.041611144 | 2.6845665 | up | noncoding |
| ASHGA5P053120 | 0.011042448 | 0.064989371 | 2.4086061 | up | noncoding |
| ASHGA5P053120 | 0.011042448 | 0.064989371 | 2.4086061 | up | noncoding |
| ASHGA5P053120 | 0.011042448 | 0.064989371 | 2.4086061 | up | noncoding |

|                 |               |                     |      |       |   |
|-----------------|---------------|---------------------|------|-------|---|
| BE174175R       |               | LincRNAs identified | 327  | chr10 | - |
| ENST00000528194 | RP11-222N13.1 | GENCODE             | 546  | chr11 | + |
| uc021vmx.1      | DKFZp434K1323 | UCSC_knowngene      | 507  | chr2  | + |
| ENST00000439364 | RP5-982E9.1   | GENCODE             | 597  | chr7  | - |
| uc010rib.1      | LOC646813     | UCSC_knowngene      | 709  | chr11 | + |
| ENST00000517363 | RP11-150O12.1 | GENCODE             | 199  | chr8  | - |
| ENST00000520306 | RP11-37B2.1   | GENCODE             | 421  | chr8  | - |
| ENST00000446789 | MCF2L-AS1     | GENCODE             | 687  | chr13 | - |
| ENST00000446789 | MCF2L-AS1     | GENCODE             | 687  | chr13 | - |
| ENST00000446789 | MCF2L-AS1     | GENCODE             | 687  | chr13 | - |
| ENST00000446789 | MCF2L-AS1     | GENCODE             | 687  | chr13 | - |
| ENST00000419950 | TMEM191A      | GENCODE             | 663  | chr22 | + |
| NR_003606       | ZNFX1-AS1     | RefSeq              | 872  | chr20 | + |
| ENST00000438109 | CYP4F30P      | GENCODE             | 2250 | chr2  | + |
| TCONS_00018263  | XLOC_008543   | LincRNAs identified | 301  | chr10 | + |
| uc021vcr.1      | BC011243      | UCSC_knowngene      | 964  | chr19 | + |
| ENST00000436123 | AC098971.2    | GENCODE             | 2964 | chr3  | - |
| ENST00000583416 | RP11-583F2.2  | GENCODE             | 2474 | chr17 | + |
| AK022421        |               | NRED                | 2134 | chr7  | - |
| ENST00000531363 | RP11-1L12.3   | GENCODE             | 745  | chr11 | - |
| TCONS_00026882  | XLOC_012945   | LincRNAs identified | 414  | chr19 | + |
| ENST00000427306 | EPB41L4A-AS1  | GENCODE             | 1367 | chr5  | + |
| ENST00000455866 | AC092171.2    | GENCODE             | 753  | chr7  | + |
| HMlincRNA1579-  | HMlincRNA1579 | LincRNAs identified | 2404 | chr3  | - |
| ENST00000576963 | RP11-353N14.2 | GENCODE             | 1788 | chr17 | + |
| ENST00000426828 | CCT6P3        | GENCODE             | 2238 | chr7  | + |
| uc003qvx.1      | AK127120      | UCSC_knowngene      | 4518 | chr6  | - |
| ENST00000555332 | CTD-253611.1  | GENCODE             | 1147 | chr15 | - |
| ENST00000428818 | TTC28-AS1     | GENCODE             | 706  | chr22 | + |
| ENST00000560221 | RP11-35O15.1  | GENCODE             | 334  | chr15 | - |
| NR_046290       | LOC100289092  | RefSeq              | 535  | chr16 | - |
| NR_046290       | LOC100289092  | RefSeq              | 535  | chr16 | - |
| ENST00000544089 | RP11-71J4.2   | GENCODE             | 476  | chr12 | + |
| ENST00000452050 | AC002454.1    | GENCODE             | 407  | chr7  | + |
| ENST00000477099 | RP11-418B12.1 | GENCODE             | 749  | chr3  | + |
| TCONS_00001416  | XLOC_000734   | LincRNAs identified | 1381 | chr1  | - |
| uc001okf.1      | AK057681      | UCSC_knowngene      | 1429 | chr11 | + |
| ENST00000520357 | RP11-110G21.1 | GENCODE             | 575  | chr8  | + |
| ENST00000567508 | RP1-39G22.7   | GENCODE             | 1541 | chr1  | - |
| TCONS_00000997  | XLOC_000263   | LincRNAs identified | 311  | chr1  | + |
| ENST00000566366 | RP1-118J21.25 | GENCODE             | 1196 | chr1  | + |
| TCONS_00005961  | XLOC_002592   | LincRNAs identified | 205  | chr3  | + |
| ENST00000412266 | AC006028.9    | GENCODE             | 3288 | chr7  | - |
| ENST00000419425 | AC006369.2    | GENCODE             | 548  | chr2  | + |
| ENST00000419425 | AC006369.2    | GENCODE             | 548  | chr2  | + |
| ENST00000419425 | AC006369.2    | GENCODE             | 548  | chr2  | + |
| ENST00000419425 | AC006369.2    | GENCODE             | 548  | chr2  | + |
| NR_049728       | PSMG1         | RefSeq              | 1033 | chr21 | - |
| NR_049728       | PSMG1         | RefSeq              | 1033 | chr21 | - |
| NR_049728       | PSMG1         | RefSeq              | 1033 | chr21 | - |
| ENST00000429621 | LINC00114     | GENCODE             | 827  | chr21 | - |
| TCONS_00020001  | XLOC_009294   | LincRNAs identified | 227  | chr11 | + |
| TCONS_00001318  | XLOC_000600   | LincRNAs identified | 565  | chr1  | + |
| ENST00000582727 | SNHG15        | GENCODE             | 1039 | chr7  | - |
| ENST00000451396 | PROX1-AS1     | GENCODE             | 476  | chr1  | - |
| ENST00000532104 | GUCY1B2       | GENCODE             | 1912 | chr13 | - |
| NR_033859       | LOC574538     | RefSeq              | 2907 | chr12 | - |
| NR_033859       | LOC574538     | RefSeq              | 2907 | chr12 | - |
| ENST00000497774 | C17orf76-AS1  | GENCODE             | 1662 | chr17 | + |
| NR_026912       | ABHD11        | RefSeq              | 1667 | chr7  | - |
| NR_026912       | ABHD11        | RefSeq              | 1667 | chr7  | - |
| NR_026912       | ABHD11        | RefSeq              | 1667 | chr7  | - |

|           |           |                   |                              |                       |
|-----------|-----------|-------------------|------------------------------|-----------------------|
| 112287106 | 112287405 |                   | ATATAAATGTTATTAGAGTGAATGA    | intergenic            |
| 15932494  | 15940087  |                   | AATACTAAATAACAGGCTCTGGCAT    | intergenic            |
| 114341204 | 114341711 | NR_003659, uc010b | GAGCGGCGGCGTTAGGACCCGGAGC    | intergenic            |
| 156396311 | 156398461 | ENST00000418309   | CTTTTCAGGGGCGATTTTATGGAGC    | intergenic            |
| 50375273  | 50379802  | uc001nhe.2        | CCACATTTTGGT# 646813         | intergenic            |
| 37333471  | 37411585  |                   | TTCCTGCTCTAGTAGCCAGTCCTGCC   | intergenic            |
| 90629157  | 90633104  |                   | TTATAAACCTTAGAATTAAGAAGTT    | intergenic            |
| 113621822 | 113623138 |                   | CCGCGCCCAGCATTCCAGCGTCCAA    | intronic antisense    |
| 113621822 | 113623138 |                   | CCGCGCCCAGCATTCCAGCGTCCAA    | intronic antisense    |
| 113621822 | 113623138 |                   | CCGCGCCCAGCATTCCAGCGTCCAA    | natural antisense     |
| 113621822 | 113623138 |                   | CCGCGCCCAGCATTCCAGCGTCCAA    | natural antisense     |
| 21057339  | 21058894  |                   | ATTCCAGGAGCA# 84222          | intergenic            |
| 47894714  | 47905795  |                   | CTCCTGACGAAA# 441951         | natural antisense     |
| 131437622 | 131443436 | uc002trt.3        | ATGAAAATTCTG# 100132708      | intergenic            |
| 89190751  | 89209410  | ENST00000413722,  | ATTTGATAGTACATTTTGTAGTAC#    | intergenic            |
| 58379176  | 58380140  |                   | TTGAACACACATGCTACCAAGCTCT#   | intergenic            |
| 24137759  | 24144714  |                   | CCATGTTTTAATCACCTTTGGGTCTC#  | intergenic            |
| 62939379  | 62947172  |                   | CATGGAGAGAAAGCTGTGATTCTTT    | intergenic            |
| 98765273  | 98767719  |                   | GGAAGAAAAAGCAGGATAAGAAAA     | intergenic            |
| 27238698  | 27241649  |                   | ACAACCTTGACATCTGCAGAAATGGG   | intergenic            |
| 8008905   | 8014249   |                   | TGAAGACGCTCAGGCCTTTGTCATT#   | intergenic            |
| 111496225 | 111497999 |                   | CCAGGGAAATAA 114915          | intergenic            |
| 5459476   | 5462753   |                   | CCCCTCTTAAATGGAGTTAAAATGG#   | intronic antisense    |
| 33273197  | 33275601  |                   | GGCATTCTAACACGGAACAGCT       | intergenic            |
| 77797250  | 77801503  |                   | CCTTATCCAAACAGTTCACACGAAG    | intergenic            |
| 64498737  | 64535091  | ENST00000419314   | TTGCCTCCAGCA# 643180         | intergenic            |
| 168067523 | 168079903 |                   | CTATGGTTTTGTGCTGTGCTGTGCAC#  | intergenic            |
| 95819689  | 95832714  |                   | ACTCCTGCAATGAATTATATGCATA#   | intergenic            |
| 28315444  | 28320951  | NR_026962         | CATCTGTGGATT# 284900         | intronic antisense    |
| 99190179  | 99190600  |                   | CGCCCTTAATGTGGTCCGGTTTCATC#  | intergenic            |
| 28890277  | 28891242  | NR_046287, NR_04  | GAATCAGGCCAC# 100289092      | natural antisense     |
| 28890277  | 28891242  | NR_046287, NR_04  | GAATCAGGCCAC# 100289092      | natural antisense     |
| 68738443  | 68743739  |                   | GGTCTAACACCTGTGTGTTCTCTCTC#  | intergenic            |
| 92465802  | 92546437  |                   | AGTCGGCTCTCCGCACGTGTCCGCG#   | natural antisense     |
| 163192854 | 163197153 |                   | TTTTGGATCCACTATAAGGATCCAA#   | intergenic            |
| 23608314  | 23610576  |                   | TGATTTTATGATTTTCGTGACTGATGC# | intergenic            |
| 67064098  | 67065527  |                   | TCTCTTTGATTTATTATTTGAGACG    | intron sense-overlapp |
| 52812274  | 52825698  |                   | GGCGAGCCGGGAAAATATTGCTACT#   | bidirectional         |
| 40722098  | 40723639  |                   | CTTGAATTTCTCAACCCTGCCTAAA#   | bidirectional         |
| 77685226  | 77686671  |                   | GGTAGACGCAGGATATTGACCTTTT#   | intergenic            |
| 40254647  | 40255843  |                   | CTCGAAGCAAGTGTATAATGCCCC#    | bidirectional         |
| 18626906  | 18628395  |                   | ACTGGCAAAGAACTCCTGAGGTGA#    | intergenic            |
| 2757466   | 2762622   |                   | CAGTCTCGAATCTCAAAAAATTACC#   | intergenic            |
| 37827278  | 37873841  |                   | GTTAACAGTGATTTCTGGCTCAGTG#   | natural antisense     |
| 37827278  | 37873841  |                   | GTTAACAGTGATTTCTGGCTCAGTG#   | natural antisense     |
| 37827278  | 37873841  |                   | GTTAACAGTGATTTCTGGCTCAGTG#   | natural antisense     |
| 37827278  | 37873841  |                   | GTTAACAGTGATTTCTGGCTCAGTG#   | natural antisense     |
| 40547371  | 40555440  |                   | CGCGGAAGAGCA 8624            | exon sense-overlappi  |
| 40547371  | 40555440  |                   | CGCGGAAGAGCA 8624            | exon sense-overlappi  |
| 40547371  | 40555440  |                   | CGCGGAAGAGCA 8624            | exon sense-overlappi  |
| 40110944  | 40119384  | ENST00000411989,  | GCTGTTGATGGT# 400866         | intergenic            |
| 118662486 | 118663730 |                   | GTGCGCGGGGGGCGCTGCGCGGTGC#   | intergenic            |
| 228688982 | 228697976 |                   | TAAAACTGTTGATATTAGGATGTA#    | intergenic            |
| 45023213  | 45026273  |                   | TACTATTTTGGG# 285958         | intergenic            |
| 214139236 | 214159496 |                   | CAGTTTGTCCATI 100505832      | intronic antisense    |
| 51590243  | 51654998  | ENST00000389600   | GAGTACTTGGCT# 2974           | intergenic            |
| 246576    | 258332    |                   | GGGACACCAGTT# 574538         | natural antisense     |
| 246576    | 258332    |                   | GGGACACCAGTT# 574538         | natural antisense     |
| 16342324  | 16345309  | ENST00000480811   | ACTTATTCGACTC 125144         | intergenic            |
| 73150426  | 73153190  |                   | ATACCCTGAGGG# 83451          | exon sense-overlappi  |
| 73150426  | 73153190  |                   | ATACCCTGAGGG# 83451          | exon sense-overlappi  |
| 73150426  | 73153190  |                   | ATACCCTGAGGG# 83451          | exon sense-overlappi  |

|                 |          |                                                |           |           |
|-----------------|----------|------------------------------------------------|-----------|-----------|
| ENST00000375608 | MCF2L    | MCF.2 cell line deriv +                        | 113548691 | 113751175 |
| ENST00000442652 | MCF2L    | MCF.2 cell line deriv +                        | 113556506 | 113750999 |
| ENST00000375604 | MCF2L    | MCF.2 cell line deriv +                        | 113622756 | 113752862 |
| ENST00000397030 | MCF2L    | MCF.2 cell line deriv +                        | 113622813 | 113754053 |
| NM_021035       | ZNFX1    | NFX1-type zinc fingi-                          | 47862438  | 47894756  |
| NM_001080495    | TNRC18   | trinucleotide repeat-c-                        | 5346422   | 5463177   |
| ENST00000415296 | PITPNB   | phosphatidylinositol -                         | 28256183  | 28316122  |
| NM_004320       | ATP2A1   | sarcoplasmic/endoplasmic reticulum chaperone + | 28889808  | 28915830  |
| NM_173201       | ATP2A1   | sarcoplasmic/endoplasmic reticulum chaperone + | 28889808  | 28915830  |
| NM_001145306    | CDK6     | cyclin-dependent kinase +                      | 92234234  | 92465941  |
| NM_207354       | ANKRD13D | ankyrin repeat domain +                        | 67056761  | 67069955  |
| NM_052937       | PCMTD1   | protein-L-isoaspartate methyltransferase -     | 52730139  | 52811735  |
| NM_005857       | ZMPSTE24 | CAAX prenyl protease +                         | 40723721  | 40759856  |
| NM_001720       | BMP8B    | bone morphogenetic protein -                   | 40223902  | 40254533  |
| NM_001270436    | CDC42EP3 | cdc42 effector protein -                       | 37869024  | 37899678  |
| NM_001270437    | CDC42EP3 | cdc42 effector protein -                       | 37869024  | 37899342  |
| NM_001270438    | CDC42EP3 | cdc42 effector protein -                       | 37869024  | 37899342  |
| NM_006449       | CDC42EP3 | cdc42 effector protein -                       | 37869024  | 37899342  |
| NM_001261824    | PSMG1    | proteasome assembly -                          | 40547371  | 40555440  |
| NM_003720       | PSMG1    | proteasome assembly -                          | 40547371  | 40555440  |
| NM_203433       | PSMG1    | proteasome assembly -                          | 40547371  | 40555440  |
| ENST00000471129 | PROX1    | prospero homeobox protein +                    | 214156523 | 214170568 |
| NM_001170738    | IQSEC3   | IQ motif and SEC7 domain +                     | 176048    | 287625    |
| NM_015232       | IQSEC3   | IQ motif and SEC7 domain +                     | 186541    | 280494    |
| NM_001145364    | ABHD11   | abhydrolase domain -                           | 73150424  | 73153184  |
| NM_148912       | ABHD11   | abhydrolase domain -                           | 73150426  | 73153184  |
| NM_148913       | ABHD11   | abhydrolase domain -                           | 73150426  | 73153184  |

|             |             |           |           |            |           |
|-------------|-------------|-----------|-----------|------------|-----------|
| 1329.955418 | 361.53067   | 9.930067  | 8.707395  | 1601.4019  | 1739.5458 |
| 445.276447  | 111.283554  | 8.203889  | 6.898316  | 528.7224   | 695.40814 |
| 3034.432933 | 762.625168  | 11.141429 | 9.878636  | 3281.7903  | 3506.8638 |
| 210.964235  | 52.557859   | 7.327287  | 5.810681  | 225.10786  | 271.2139  |
| 20.162021   | 7.344223    | 4.002053  | 2.783199  | 27.12701   | 22.817219 |
| 46.299478   | 14.050899   | 5.161185  | 3.990565  | 34.58941   | 44.485054 |
| 150.338079  | 32.112756   | 6.525848  | 5.172478  | 81.49933   | 75.33894  |
| 980.38266   | 216.146199  | 9.38881   | 7.850882  | 726.4145   | 554.242   |
| 980.38266   | 216.146199  | 9.38881   | 7.850882  | 726.4145   | 554.242   |
| 980.38266   | 216.146199  | 9.38881   | 7.850882  | 726.4145   | 554.242   |
| 980.38266   | 216.146199  | 9.38881   | 7.850882  | 726.4145   | 554.242   |
| 235.205378  | 47.109923   | 7.258463  | 5.781876  | 161.26784  | 142.00903 |
| 21978.81067 | 4819.445    | 13.947762 | 12.632353 | 24894.436  | 35036.36  |
| 30.722069   | 7.852914    | 4.282838  | 2.966523  | 45.953136  | 29.143328 |
| 1167.448547 | 293.516787  | 9.778483  | 8.514452  | 1015.00714 | 1029.9496 |
| 3941.94275  | 1144.142883 | 11.483934 | 10.474388 | 4771.251   | 5491.596  |
| 25213.91433 | 5595.1612   | 14.144924 | 12.863966 | 28737.672  | 32746.303 |
| 30.573913   | 7.482187    | 4.444376  | 2.997504  | 16.13018   | 13.318779 |
| 23.662342   | 7.949929    | 4.138592  | 3.064023  | 20.04726   | 10.484849 |
| 1441.923788 | 58.422798   | 8.722754  | 5.678229  | 2055.73    | 98.3946   |
| 59.377213   | 14.318955   | 5.538855  | 4.1296    | 62.749947  | 61.487556 |
| 279.61623   | 73.163753   | 7.670967  | 6.512453  | 357.37045  | 482.36276 |
| 89.709799   | 11.159549   | 6.100347  | 3.633828  | 90.06372   | 64.777664 |
| 16.11718    | 5.681187    | 3.67887   | 2.588635  | 20.079998  | 19.046434 |
| 529.721438  | 43.791991   | 8.598883  | 5.664763  | 544.4301   | 354.9969  |
| 1192.409867 | 268.899213  | 9.792261  | 8.422734  | 1087.6128  | 818.0177  |
| 331.5599    | 59.376694   | 7.971684  | 6.22437   | 327.76126  | 219.40788 |
| 623.375908  | 115.068995  | 8.6893    | 6.562697  | 768.9481   | 858.0023  |
| 974.152182  | 262.687451  | 9.387463  | 8.323971  | 995.14514  | 524.23505 |
| 288.618951  | 34.384891   | 7.481459  | 5.419924  | 408.60266  | 689.40356 |
| 837.701293  | 128.747445  | 9.197579  | 7.3206    | 1148.493   | 1110.7358 |
| 837.701293  | 128.747445  | 9.197579  | 7.3206    | 1148.493   | 1110.7358 |
| 141.961502  | 45.544503   | 6.771616  | 5.592882  | 207.1011   | 149.92656 |
| 1518.026322 | 246.281562  | 9.693945  | 6.942629  | 1687.0659  | 2443.2346 |
| 28.974866   | 8.585585    | 4.500863  | 3.181954  | 30.80489   | 37.24317  |
| 74.216363   | 19.38507    | 5.720068  | 4.340547  | 53.632484  | 36.376713 |
| 25.454263   | 6.11921     | 4.310384  | 2.652602  | 26.705494  | 19.898668 |
| 791.736525  | 229.368692  | 9.185055  | 8.073447  | 828.3746   | 609.34796 |
| 753.960578  | 229.812658  | 9.127368  | 8.008725  | 917.1815   | 641.0678  |
| 42.652494   | 11.114258   | 4.995213  | 3.641068  | 56.88232   | 70.10694  |
| 1241.223967 | 295.638065  | 9.867602  | 8.235515  | 1186.909   | 1195.8832 |
| 36.115291   | 8.803379    | 4.799251  | 3.175475  | 46.115757  | 47.547455 |
| 917.664225  | 220.010382  | 9.407647  | 8.140545  | 969.8376   | 646.2019  |
| 49.257797   | 13.847146   | 5.207556  | 3.987537  | 68.59293   | 63.981853 |
| 49.257797   | 13.847146   | 5.207556  | 3.987537  | 68.59293   | 63.981853 |
| 49.257797   | 13.847146   | 5.207556  | 3.987537  | 68.59293   | 63.981853 |
| 49.257797   | 13.847146   | 5.207556  | 3.987537  | 68.59293   | 63.981853 |
| 5993.09745  | 1019.052458 | 12.110625 | 10.396756 | 6156.4175  | 6072.67   |
| 5993.09745  | 1019.052458 | 12.110625 | 10.396756 | 6156.4175  | 6072.67   |
| 5993.09745  | 1019.052458 | 12.110625 | 10.396756 | 6156.4175  | 6072.67   |
| 137.26089   | 39.293083   | 6.630357  | 5.563647  | 103.09748  | 109.4076  |
| 92.971775   | 29.140447   | 6.188008  | 5.15138   | 106.3231   | 89.47074  |
| 197.713305  | 61.279523   | 7.255472  | 6.154867  | 240.26672  | 244.40237 |
| 1279.825283 | 180.467212  | 9.87677   | 7.797223  | 1423.542   | 1816.065  |
| 109.87296   | 13.24967    | 6.388508  | 3.953041  | 83.80144   | 74.68716  |
| 33.058856   | 6.693243    | 4.428912  | 2.745342  | 30.45847   | 4.9999995 |
| 21.507207   | 7.590157    | 4.028227  | 3.003134  | 20.14874   | 10.251008 |
| 21.507207   | 7.590157    | 4.028227  | 3.003134  | 20.14874   | 10.251008 |
| 625.682182  | 142.118657  | 8.838611  | 7.413922  | 727.59094  | 978.3546  |
| 71.068103   | 19.993156   | 5.778909  | 4.51071   | 78.51296   | 93.258896 |
| 71.068103   | 19.993156   | 5.778909  | 4.51071   | 78.51296   | 93.258896 |
| 71.068103   | 19.993156   | 5.778909  | 4.51071   | 78.51296   | 93.258896 |



|            |            |            |            |           |            |
|------------|------------|------------|------------|-----------|------------|
| 860.28314  | 960.88837  | 1454.5087  | 1363.1046  | 298.9457  | 142.5112   |
| 242.0109   | 124.92671  | 574.2852   | 506.30533  | 145.47972 | 64.68541   |
| 3332.7305  | 2656.5542  | 2487.5288  | 2941.13    | 910.13995 | 494.28055  |
| 203.49438  | 239.87253  | 117.94589  | 208.15085  | 72.19224  | 45.510113  |
| 18.98744   | 18.62608   | 15.73826   | 17.676119  | 7.555797  | 4.9999995  |
| 29.770924  | 59.187218  | 50.13387   | 59.630394  | 10.593299 | 6.12574    |
| 58.447044  | 319.24402  | 74.25408   | 293.24506  | 22.774574 | 28.143404  |
| 923.89886  | 1983.2797  | 522.1938   | 1172.2671  | 100.30231 | 78.387825  |
| 923.89886  | 1983.2797  | 522.1938   | 1172.2671  | 100.30231 | 78.387825  |
| 923.89886  | 1983.2797  | 522.1938   | 1172.2671  | 100.30231 | 78.387825  |
| 923.89886  | 1983.2797  | 522.1938   | 1172.2671  | 100.30231 | 78.387825  |
| 160.28375  | 635.19434  | 124.388    | 188.08931  | 45.088425 | 19.762156  |
| 12034.852  | 23803.846  | 14313.35   | 21790.02   | 4699.3984 | 5795.8896  |
| 68.55266   | 7.747082   | 15.904981  | 17.03123   | 14.31066  | 4.9999995  |
| 988.17694  | 1248.392   | 1189.2919  | 1533.8737  | 243.25824 | 173.1483   |
| 3059.1328  | 3097.67    | 3389.642   | 3842.3647  | 833.663   | 576.0943   |
| 16092.811  | 15643.95   | 27362.781  | 30699.969  | 5323.0996 | 4700.526   |
| 22.491407  | 59.272198  | 28.125792  | 44.105125  | 6.6169887 | 4.9999995  |
| 29.344158  | 35.557533  | 12.574901  | 33.96535   | 4.9999995 | 4.9999995  |
| 4170.3184  | 26.617426  | 1273.8289  | 1026.6534  | 71.28038  | 12.62886   |
| 46.47746   | 71.54467   | 44.718975  | 69.28467   | 12.359639 | 12.707201  |
| 221.58408  | 191.10924  | 192.03197  | 233.23888  | 69.4225   | 61.988735  |
| 86.01168   | 128.652    | 57.08171   | 111.67202  | 7.673823  | 6.629148   |
| 12.428449  | 14.104529  | 14.770011  | 16.27366   | 5.402384  | 4.9999995  |
| 689.00903  | 706.9403   | 295.1037   | 587.8486   | 35.73966  | 29.534042  |
| 1330.5804  | 1656.8707  | 902.734    | 1358.6436  | 284.7434  | 193.36621  |
| 356.34854  | 265.10266  | 391.6928   | 429.04626  | 57.120777 | 50.121014  |
| 288.39658  | 192.01547  | 929.2214   | 703.6716   | 98.022255 | 24.82633   |
| 1434.5348  | 1462.2296  | 396.2094   | 1032.5591  | 267.88815 | 124.923325 |
| 115.75953  | 214.97292  | 103.453674 | 199.52136  | 30.87958  | 36.84887   |
| 1186.625   | 387.2021   | 573.2229   | 619.92896  | 139.16519 | 121.398186 |
| 1186.625   | 387.2021   | 573.2229   | 619.92896  | 139.16519 | 121.398186 |
| 126.50126  | 138.12648  | 115.64002  | 114.473595 | 56.671936 | 28.312984  |
| 668.9699   | 152.15533  | 2405.992   | 1750.7402  | 182.31816 | 36.129242  |
| 30.780901  | 34.233814  | 15.80272   | 24.9837    | 7.514625  | 4.9999995  |
| 76.673386  | 150.59225  | 39.810966  | 88.21238   | 22.83889  | 6.9715424  |
| 26.665487  | 16.746517  | 30.545652  | 32.16376   | 7.96792   | 4.9999995  |
| 1093.543   | 434.60654  | 889.33325  | 895.2138   | 192.3265  | 99.65457   |
| 1019.16284 | 789.95496  | 463.13577  | 693.2606   | 294.59848 | 143.03802  |
| 28.837305  | 38.574093  | 25.579136  | 35.93517   | 11.39972  | 5.1541333  |
| 1188.0292  | 1488.1279  | 947.6417   | 1440.7528  | 310.01056 | 65.96216   |
| 28.228142  | 25.155676  | 40.090584  | 29.554129  | 8.284737  | 4.9999995  |
| 1171.2856  | 1096.3833  | 606.7161   | 1015.56085 | 182.85864 | 185.7518   |
| 41.761093  | 27.555107  | 55.665047  | 37.99075   | 14.935382 | 17.42183   |
| 41.761093  | 27.555107  | 55.665047  | 37.99075   | 14.935382 | 17.42183   |
| 41.761093  | 27.555107  | 55.665047  | 37.99075   | 14.935382 | 17.42183   |
| 41.761093  | 27.555107  | 55.665047  | 37.99075   | 14.935382 | 17.42183   |
| 5646.8555  | 6293.6714  | 4790.1743  | 6998.796   | 937.3036  | 912.07025  |
| 5646.8555  | 6293.6714  | 4790.1743  | 6998.796   | 937.3036  | 912.07025  |
| 5646.8555  | 6293.6714  | 4790.1743  | 6998.796   | 937.3036  | 912.07025  |
| 71.2654    | 249.66644  | 102.40021  | 187.72821  | 31.033947 | 21.285696  |
| 94.98199   | 106.694176 | 77.804245  | 82.5564    | 27.538502 | 24.027985  |
| 173.59216  | 176.80869  | 171.27495  | 179.93494  | 49.396    | 25.725016  |
| 1024.9548  | 1324.8738  | 837.6441   | 1251.872   | 145.09618 | 179.82257  |
| 95.32167   | 109.85318  | 141.81279  | 153.76152  | 14.05433  | 6.6749835  |
| 57.20181   | 25.942774  | 37.45171   | 42.29837   | 4.9999995 | 4.9999995  |
| 24.371359  | 32.205303  | 12.287771  | 29.779062  | 8.1803055 | 6.5249386  |
| 24.371359  | 32.205303  | 12.287771  | 29.779062  | 8.1803055 | 6.5249386  |
| 387.5921   | 579.9324   | 465.8288   | 614.79425  | 126.26629 | 96.31196   |
| 63.81292   | 77.5813    | 42.90803   | 70.33451   | 23.931679 | 8.132209   |
| 63.81292   | 77.5813    | 42.90803   | 70.33451   | 23.931679 | 8.132209   |
| 63.81292   | 77.5813    | 42.90803   | 70.33451   | 23.931679 | 8.132209   |

|            |           |            |           |            |            |
|------------|-----------|------------|-----------|------------|------------|
| 718.7078   | 288.75046 | 436.57776  | 283.6911  | 10.178893  | 10.362165  |
| 254.86128  | 61.09716  | 83.90404   | 57.673717 | 8.560154   | 9.117746   |
| 1318.3896  | 566.8731  | 740.92175  | 545.14606 | 11.2037945 | 11.353091  |
| 111.12081  | 27.665346 | 33.99452   | 24.864128 | 7.365525   | 7.816457   |
| 16.50954   | 4.9999995 | 4.9999995  | 4.9999995 | 4.308839   | 4.471334   |
| 12.705611  | 25.718529 | 14.288867  | 14.873351 | 4.65056    | 5.3575344  |
| 12.46276   | 61.49335  | 22.068546  | 45.7339   | 5.897513   | 6.0480924  |
| 117.99268  | 254.6518  | 440.675    | 304.86758 | 9.037142   | 8.805644   |
| 117.99268  | 254.6518  | 440.675    | 304.86758 | 9.037142   | 8.805644   |
| 117.99268  | 254.6518  | 440.675    | 304.86758 | 9.037142   | 8.805644   |
| 117.99268  | 254.6518  | 440.675    | 304.86758 | 9.037142   | 8.805644   |
| 67.48276   | 48.297283 | 64.29517   | 37.733746 | 6.8753314  | 6.9186983  |
| 3572.3367  | 6064.687  | 4240.6533  | 4543.705  | 14.17012   | 14.7291355 |
| 11.27942   | 4.9999995 | 6.5274043  | 4.9999995 | 5.0617476  | 4.8021708  |
| 359.85098  | 267.55756 | 429.96417  | 287.32147 | 9.515246   | 9.663292   |
| 1687.0348  | 981.1602  | 1582.2458  | 1204.6592 | 11.740653  | 11.97067   |
| 5780.2866  | 6994.8413 | 5607.015   | 5165.1987 | 14.370472  | 14.579334  |
| 5.556342   | 15.190182 | 5.5099425  | 7.0196667 | 3.5401654  | 3.7736626  |
| 5.586136   | 12.18911  | 8.21045    | 11.71388  | 3.8650498  | 3.4615943  |
| 133.48238  | 14.067228 | 80.59243   | 38.48551  | 10.52497   | 6.4059496  |
| 12.432272  | 17.357979 | 12.96898   | 18.087658 | 5.51504    | 5.779569   |
| 82.52173   | 61.75922  | 98.94163   | 64.3487   | 8.022528   | 8.6043415  |
| 21.17967   | 7.565054  | 12.27018   | 11.639421 | 6.039561   | 5.845935   |
| 8.4478445  | 5.2368975 | 4.9999995  | 4.9999995 | 3.8672132  | 4.2381277  |
| 22.219873  | 87.00156  | 36.765594  | 51.49122  | 8.603849   | 8.186546   |
| 336.0805   | 249.46971 | 320.51062  | 229.22484 | 9.613865   | 9.346241   |
| 60.08896   | 78.73616  | 57.862206  | 52.331047 | 7.899537   | 7.521781   |
| 390.3477   | 45.252575 | 76.64488   | 55.320232 | 9.127946   | 9.406958   |
| 423.58148  | 251.37372 | 291.42892  | 216.92911 | 9.488339   | 8.723316   |
| 27.72032   | 43.53675  | 37.64749   | 29.676336 | 8.21464    | 9.104666   |
| 155.81142  | 93.258125 | 160.52736  | 102.32439 | 9.694508   | 9.767113   |
| 155.81142  | 93.258125 | 160.52736  | 102.32439 | 9.694508   | 9.767113   |
| 103.2248   | 33.06769  | 17.70512   | 34.284485 | 7.240632   | 6.993594   |
| 1083.148   | 33.012825 | 106.20969  | 36.871456 | 10.2493    | 10.831475  |
| 15.676701  | 8.288789  | 7.342129   | 7.6912684 | 4.489123   | 5.124469   |
| 35.726383  | 8.622001  | 24.29338   | 17.858221 | 5.277318   | 5.092699   |
| 4.9999995  | 8.747341  | 4.9999995  | 4.9999995 | 4.2824736  | 4.2934694  |
| 318.7354   | 159.70248 | 380.38983  | 225.40337 | 9.232642   | 8.935298   |
| 437.1325   | 96.48863  | 270.2748   | 137.34352 | 9.371874   | 9.004969   |
| 17.240002  | 7.270744  | 14.63407   | 10.986879 | 5.3685813  | 5.9547     |
| 553.5972   | 119.1494  | 467.89557  | 257.2135  | 9.73489    | 9.866453   |
| 17.814095  | 5.3849607 | 9.021603   | 7.3148794 | 5.066824   | 5.443587   |
| 199.49454  | 294.4221  | 243.41315  | 214.12206 | 9.450233   | 9.014611   |
| 20.866032  | 6.106446  | 10.7211485 | 13.032039 | 5.638851   | 5.8282285  |
| 20.866032  | 6.106446  | 10.7211485 | 13.032039 | 5.638851   | 5.8282285  |
| 20.866032  | 6.106446  | 10.7211485 | 13.032039 | 5.638851   | 5.8282285  |
| 20.866032  | 6.106446  | 10.7211485 | 13.032039 | 5.638851   | 5.8282285  |
| 958.8808   | 1026.9312 | 1323.4216  | 955.7073  | 12.096656  | 12.106145  |
| 958.8808   | 1026.9312 | 1323.4216  | 955.7073  | 12.096656  | 12.106145  |
| 958.8808   | 1026.9312 | 1323.4216  | 955.7073  | 12.096656  | 12.106145  |
| 55.392868  | 48.677788 | 42.462776  | 36.905422 | 6.2408614  | 6.5534205  |
| 41.70348   | 31.947245 | 25.796171  | 23.829298 | 6.2862306  | 6.2790275  |
| 107.430695 | 61.65771  | 66.978546  | 56.48917  | 7.456524   | 7.666481   |
| 93.570335  | 270.95245 | 204.31194  | 189.0498  | 10.003053  | 10.423735  |
| 18.199287  | 14.933701 | 14.49179   | 11.143931 | 5.9369946  | 6.036209   |
| 4.9999995  | 8.434877  | 11.72458   | 4.9999995 | 4.472847   | 2.3499577  |
| 15.167062  | 5.6686344 | 4.9999995  | 4.9999995 | 3.8721473  | 3.431062   |
| 15.167062  | 5.6686344 | 4.9999995  | 4.9999995 | 3.8721473  | 3.431062   |
| 152.541    | 86.92263  | 250.83525  | 139.83481 | 9.040924   | 9.589903   |
| 26.258944  | 16.15326  | 27.051327  | 18.431519 | 5.8414736  | 6.3328805  |
| 26.258944  | 16.15326  | 27.051327  | 18.431519 | 5.8414736  | 6.3328805  |
| 26.258944  | 16.15326  | 27.051327  | 18.431519 | 5.8414736  | 6.3328805  |

|            |           |           |           |           |           |
|------------|-----------|-----------|-----------|-----------|-----------|
| 9.395338   | 9.589903  | 10.226981 | 9.827123  | 8.489643  | 8.005969  |
| 7.591375   | 6.6335535 | 8.909478  | 8.41103   | 7.416786  | 6.870746  |
| 11.329662  | 11.043038 | 11.007272 | 10.911717 | 10.1455   | 9.811741  |
| 7.3562946  | 7.5992785 | 6.660993  | 7.165174  | 6.404771  | 6.355981  |
| 3.92721    | 3.684724  | 3.8993936 | 3.720819  | 3.1130807 | 2.4279919 |
| 4.5871224  | 5.506925  | 5.4714303 | 5.3935366 | 3.6324975 | 3.3657851 |
| 5.5545783  | 7.996295  | 6.010092  | 7.648516  | 4.7492137 | 5.6513157 |
| 9.48543    | 10.625169 | 8.773653  | 9.6058235 | 6.884366  | 7.1422005 |
| 9.48543    | 10.625169 | 8.773653  | 9.6058235 | 6.884366  | 7.1422005 |
| 9.48543    | 10.625169 | 8.773653  | 9.6058235 | 6.884366  | 7.1422005 |
| 9.48543    | 10.625169 | 8.773653  | 9.6058235 | 6.884366  | 7.1422005 |
| 6.990489   | 8.998642  | 6.7375274 | 7.0300875 | 5.7245784 | 5.1335692 |
| 13.236744  | 14.227712 | 13.510657 | 13.812202 | 12.509256 | 13.388846 |
| 5.7898073  | 2.459827  | 3.9156823 | 3.6677918 | 4.0676994 | 2.4279919 |
| 9.577352   | 9.968546  | 9.953018  | 9.993444  | 8.184559  | 8.279015  |
| 11.193256  | 11.264572 | 11.431436 | 11.303015 | 10.010733 | 10.028292 |
| 13.688972  | 13.588936 | 14.333352 | 14.308476 | 12.688867 | 13.098996 |
| 4.17781    | 5.508582  | 4.6849294 | 4.9811063 | 2.9221995 | 2.4279919 |
| 4.5678964  | 4.717102  | 3.592714  | 4.6271977 | 2.3467326 | 2.4279919 |
| 11.676552  | 4.269783  | 10.040541 | 9.418731  | 6.3876615 | 4.4573    |
| 5.2184324  | 5.7963104 | 5.321207  | 5.6025724 | 3.8564725 | 4.4648232 |
| 7.469465   | 7.2572775 | 7.3502674 | 7.3219213 | 6.350757  | 6.8075266 |
| 6.1110935  | 6.6782455 | 5.6478267 | 6.2794204 | 3.134729  | 3.4860427 |
| 3.3072598  | 3.2423792 | 3.8142054 | 3.6040325 | 2.6363752 | 2.4279919 |
| 9.067061   | 9.157744  | 7.9637036 | 8.614396  | 5.3947167 | 5.7241726 |
| 10.0166855 | 10.388451 | 9.5666065 | 9.821717  | 8.415353  | 8.455578  |
| 8.139521   | 7.735101  | 8.360454  | 8.173707  | 6.0756764 | 6.495697  |
| 7.840444   | 7.264751  | 9.612837  | 8.882866  | 6.84785   | 5.464513  |
| 10.110342  | 10.198489 | 8.376562  | 9.427729  | 8.325664  | 7.811635  |
| 6.5360494  | 7.43797   | 6.48076   | 7.114668  | 5.183704  | 6.050988  |
| 9.842656   | 8.276898  | 8.905201  | 8.699101  | 7.349468  | 7.7707605 |
| 9.842656   | 8.276898  | 8.905201  | 8.699101  | 7.349468  | 7.7707605 |
| 6.659038   | 6.7841897 | 6.6358724 | 6.3163724 | 6.06201   | 5.6606035 |
| 9.020351   | 6.9225497 | 10.957084 | 10.182909 | 7.7611227 | 6.0224094 |
| 4.6373506  | 4.658831  | 3.9052913 | 4.190112  | 3.1034155 | 2.4279919 |
| 5.9457617  | 6.906183  | 5.15489   | 5.9435587 | 4.7536535 | 3.5651326 |
| 4.425802   | 3.5157945 | 4.7915974 | 4.553167  | 3.1947105 | 2.4279919 |
| 9.720829   | 8.454127  | 9.544226  | 9.223209  | 7.8323364 | 7.4943223 |
| 9.619337   | 9.311349  | 8.596036  | 8.860646  | 8.466291  | 8.009429  |
| 4.541626   | 4.843514  | 4.5610785 | 4.70178   | 3.7419677 | 3.0947804 |
| 9.845725   | 10.220142 | 9.638157  | 9.900243  | 8.541823  | 6.900912  |
| 4.5098515  | 4.176882  | 5.1659017 | 4.4324594 | 3.2564945 | 2.4279919 |
| 9.827123   | 9.774209  | 8.9801445 | 9.399561  | 7.763898  | 8.388277  |
| 5.0643563  | 4.3214145 | 5.6138725 | 4.7786136 | 4.1312904 | 4.9431906 |
| 5.0643563  | 4.3214145 | 5.6138725 | 4.7786136 | 4.1312904 | 4.9431906 |
| 5.0643563  | 4.3214145 | 5.6138725 | 4.7786136 | 4.1312904 | 4.9431906 |
| 5.0643563  | 4.3214145 | 5.6138725 | 4.7786136 | 4.1312904 | 4.9431906 |
| 12.105225  | 12.27947  | 11.920088 | 12.156163 | 10.187893 | 10.710006 |
| 12.105225  | 12.27947  | 11.920088 | 12.156163 | 10.187893 | 10.710006 |
| 12.105225  | 12.27947  | 11.920088 | 12.156163 | 10.187893 | 10.710006 |
| 5.841633   | 7.6550393 | 6.4639854 | 7.0272036 | 5.1889553 | 5.244028  |
| 6.2487144  | 6.388566  | 6.0768285 | 5.8486814 | 5.0198116 | 5.419451  |
| 7.1099005  | 7.14412   | 7.1909933 | 6.964814  | 5.8589325 | 5.5199423 |
| 9.626983   | 10.047306 | 9.447347  | 9.712195  | 7.4115043 | 8.338058  |
| 6.2521772  | 6.4339237 | 6.9296117 | 6.7421327 | 4.040629  | 3.4989576 |
| 5.523938   | 4.2283254 | 5.075079  | 4.9233227 | 2.3467326 | 2.4279919 |
| 4.2969522  | 4.5650153 | 3.5596676 | 4.4445186 | 3.2352588 | 3.463159  |
| 4.2969522  | 4.5650153 | 3.5596676 | 4.4445186 | 3.2352588 | 3.463159  |
| 8.249008   | 8.860327  | 8.60511   | 8.686392  | 7.2126503 | 7.44591   |
| 5.6912537  | 5.9152474 | 5.265888  | 5.626709  | 4.8239346 | 3.7896497 |
| 5.6912537  | 5.9152474 | 5.265888  | 5.626709  | 4.8239346 | 3.7896497 |
| 5.6912537  | 5.9152474 | 5.265888  | 5.626709  | 4.8239346 | 3.7896497 |

|           |           |           |            |
|-----------|-----------|-----------|------------|
| 9.430864  | 8.619258  | 9.007913  | 8.6907215  |
| 7.9416356 | 6.226834  | 6.644643  | 6.2892513  |
| 10.300857 | 9.609529  | 9.764     | 9.640189   |
| 6.7576475 | 4.992227  | 5.361358  | 4.992101   |
| 4.1026797 | 2.3408759 | 2.3618152 | 2.352752   |
| 3.7482593 | 4.87635   | 4.107762  | 4.2127376  |
| 3.722822  | 6.236862  | 4.737559  | 5.9370975  |
| 6.8434854 | 8.422825  | 9.024214  | 8.788202   |
| 6.8434854 | 8.422825  | 9.024214  | 8.788202   |
| 6.8434854 | 8.422825  | 9.024214  | 8.788202   |
| 6.8434854 | 8.422825  | 9.024214  | 8.788202   |
| 6.056382  | 5.858295  | 6.273612  | 5.6448193  |
| 11.782421 | 13.044908 | 12.318564 | 12.75012   |
| 3.59337   | 2.3408759 | 3.016451  | 2.352752   |
| 8.435932  | 8.498161  | 8.984613  | 8.704435   |
| 10.659363 | 10.436133 | 10.882229 | 10.829578  |
| 12.468296 | 13.256198 | 12.746854 | 12.9245825 |
| 2.6975646 | 4.0644636 | 2.7988324 | 3.0739717  |
| 2.7043612 | 3.7232053 | 3.3326278 | 3.849219   |
| 7.0156975 | 3.9421318 | 6.589743  | 5.676843   |
| 3.7201068 | 4.2608533 | 3.9732928 | 4.5020523  |
| 6.333911  | 6.2466826 | 6.8842144 | 6.4516253  |
| 4.44253   | 3.007125  | 3.8938975 | 3.8386447  |
| 3.2080941 | 2.5447836 | 2.3618152 | 2.352752   |
| 4.5074472 | 6.77469   | 5.473324  | 6.114225   |
| 8.338058  | 8.388046  | 8.564828  | 8.374539   |
| 5.8950615 | 6.6237035 | 6.118871  | 6.1372123  |
| 8.560154  | 5.7524366 | 6.5235806 | 6.227646   |
| 8.678753  | 8.401184  | 8.435512  | 8.291078   |
| 4.812683  | 5.6895695 | 5.5040965 | 5.2785006  |
| 7.2330317 | 6.8736258 | 7.5562115 | 7.1405044  |
| 7.2330317 | 6.8736258 | 7.5562115 | 7.1405044  |
| 6.652729  | 5.2621775 | 4.4195194 | 5.5002513  |
| 10.015636 | 5.259212  | 6.98722   | 5.610174   |
| 4.034582  | 3.139344  | 3.1742296 | 3.212164   |
| 5.1628685 | 3.203964  | 4.873744  | 4.4839215  |
| 2.350709  | 3.2276337 | 2.3618152 | 2.352752   |
| 8.266052  | 7.6891384 | 8.809521  | 8.349313   |
| 8.728037  | 6.925351  | 8.328635  | 7.5946083  |
| 4.1603127 | 2.954668  | 4.1440926 | 3.7505887  |
| 9.061951  | 7.2531204 | 9.1084795 | 8.546806   |
| 4.2072234 | 2.5660427 | 3.458692  | 3.1364045  |
| 7.5899186 | 8.648746  | 8.181606  | 8.270824   |
| 4.4234266 | 2.7149887 | 3.7008774 | 4.0114455  |
| 4.4234266 | 2.7149887 | 3.7008774 | 4.0114455  |
| 4.4234266 | 2.7149887 | 3.7008774 | 4.0114455  |
| 4.4234266 | 2.7149887 | 3.7008774 | 4.0114455  |
| 9.84461   | 10.506499 | 10.631641 | 10.499889  |
| 9.84461   | 10.506499 | 10.631641 | 10.499889  |
| 9.84461   | 10.506499 | 10.631641 | 10.499889  |
| 5.78483   | 5.8707657 | 5.681609  | 5.6116915  |
| 5.3785915 | 5.2083826 | 4.958237  | 4.923807   |
| 6.71343   | 6.2416773 | 6.334403  | 6.260819   |
| 6.5130377 | 8.519536  | 7.9261293 | 8.075073   |
| 4.2407823 | 4.0373206 | 4.128972  | 3.771582   |
| 2.350709  | 3.1671808 | 3.8266878 | 2.352752   |
| 3.9877596 | 2.6180596 | 2.3618152 | 2.352752   |
| 3.9877596 | 2.6180596 | 2.3618152 | 2.352752   |
| 7.201956  | 6.773463  | 8.230258  | 7.619292   |
| 4.7376976 | 4.1562896 | 5.028653  | 4.528037   |
| 4.7376976 | 4.1562896 | 5.028653  | 4.528037   |
| 4.7376976 | 4.1562896 | 5.028653  | 4.528037   |

|               |             |             |            |    |           |
|---------------|-------------|-------------|------------|----|-----------|
| ASHGA5P035316 | 0.003732342 | 0.03919943  | 9.0096127  | up | noncoding |
| ASHGA5P029195 | 0.014985811 | 0.074989017 | 2.4653166  | up | noncoding |
| ASHGA5P029195 | 0.014985811 | 0.074989017 | 2.4653166  | up | noncoding |
| ASHGA5P042177 | 0.025236058 | 0.098803647 | 2.0409332  | up | noncoding |
| ASHGA5P042177 | 0.025236058 | 0.098803647 | 2.0409332  | up | noncoding |
| ASHGA5P044133 | 8.93149E-06 | 0.004010044 | 2.5035938  | up | noncoding |
| ASHGA5P033860 | 0.001552334 | 0.026472272 | 2.1227728  | up | noncoding |
| ASHGA5P054913 | 0.000526842 | 0.015826428 | 2.0673705  | up | noncoding |
| ASHGA5P054913 | 0.000526842 | 0.015826428 | 2.0673705  | up | noncoding |
| ASHGA5P054913 | 0.000526842 | 0.015826428 | 2.0673705  | up | noncoding |
| ASHGA5P057291 | 0.000148634 | 0.01076444  | 4.5051681  | up | noncoding |
| ASHGA5P036826 | 0.016266019 | 0.07799128  | 2.6639382  | up | noncoding |
| ASHGA5P036826 | 0.016266019 | 0.07799128  | 2.6639382  | up | noncoding |
| ASHGA5P036826 | 0.016266019 | 0.07799128  | 2.6639382  | up | noncoding |
| ASHGA5P052416 | 0.000567686 | 0.01610992  | 3.9022052  | up | noncoding |
| ASHGA5P052416 | 0.000567686 | 0.01610992  | 3.9022052  | up | noncoding |
| ASHGA5P015833 | 0.000218654 | 0.01146874  | 5.3549971  | up | noncoding |
| ASHGA5P015833 | 0.000218654 | 0.01146874  | 5.3549971  | up | noncoding |
| ASHGA5P015833 | 0.000218654 | 0.01146874  | 5.3549971  | up | noncoding |
| ASHGA5P027679 | 0.042085485 | 0.131395683 | 16.5454554 | up | noncoding |
| ASHGA5P037417 | 0.012648784 | 0.06880509  | 2.2802399  | up | noncoding |
| ASHGA5P037417 | 0.012648784 | 0.06880509  | 2.2802399  | up | noncoding |
| ASHGA5P037417 | 0.012648784 | 0.06880509  | 2.2802399  | up | noncoding |
| ASHGA5P037417 | 0.012648784 | 0.06880509  | 2.2802399  | up | noncoding |
| ASHGA5P037417 | 0.012648784 | 0.06880509  | 2.2802399  | up | noncoding |
| ASHGA5P037417 | 0.012648784 | 0.06880509  | 2.2802399  | up | noncoding |
| ASHGA5P037417 | 0.012648784 | 0.06880509  | 2.2802399  | up | noncoding |
| ASHGA5P037417 | 0.012648784 | 0.06880509  | 2.2802399  | up | noncoding |
| ASHGA5P037417 | 0.012648784 | 0.06880509  | 2.2802399  | up | noncoding |
| ASHGA5P037417 | 0.012648784 | 0.06880509  | 2.2802399  | up | noncoding |
| ASHGA5P036782 | 0.008056913 | 0.056483235 | 2.0959492  | up | noncoding |
| ASHGA5P036782 | 0.008056913 | 0.056483235 | 2.0959492  | up | noncoding |
| ASHGA5P043018 | 0.000467732 | 0.015177128 | 6.6138405  | up | noncoding |
| ASHGA5P043018 | 0.000467732 | 0.015177128 | 6.6138405  | up | noncoding |
| ASHGA5P043018 | 0.000467732 | 0.015177128 | 6.6138405  | up | noncoding |
| ASHGA5P043018 | 0.000467732 | 0.015177128 | 6.6138405  | up | noncoding |
| ASHGA5P025851 | 0.002013153 | 0.029606317 | 3.5687454  | up | noncoding |
| ASHGA5P025851 | 0.002013153 | 0.029606317 | 3.5687454  | up | noncoding |
| ASHGA5P044029 | 0.040249244 | 0.128419201 | 2.0190485  | up | noncoding |
| ASHGA5P044203 | 1.06596E-05 | 0.004010044 | 3.3489264  | up | noncoding |
| ASHGA5P021040 | 0.005082291 | 0.045256951 | 2.1552209  | up | noncoding |
| ASHGA5P031377 | 0.005100157 | 0.04534084  | 3.2388311  | up | noncoding |
| ASHGA5P021045 | 0.011216107 | 0.065344868 | 2.9561737  | up | noncoding |
| ASHGA5P021045 | 0.011216107 | 0.065344868 | 2.9561737  | up | noncoding |
| ASHGA5P021045 | 0.011216107 | 0.065344868 | 2.9561737  | up | noncoding |
| ASHGA5P021045 | 0.011216107 | 0.065344868 | 2.9561737  | up | noncoding |
| ASHGA5P020868 | 0.004823018 | 0.044076887 | 2.9082254  | up | noncoding |
| ASHGA5P032880 | 0.007606816 | 0.05476971  | 2.5417335  | up | noncoding |
| ASHGA5P053402 | 0.000381961 | 0.013977512 | 4.0736694  | up | noncoding |
| ASHGA5P053402 | 0.000381961 | 0.013977512 | 4.0736694  | up | noncoding |
| ASHGA5P053486 | 0.002242285 | 0.031214119 | 3.0913827  | up | noncoding |
| ASHGA5P030942 | 0.026588029 | 0.101816856 | 2.0983836  | up | noncoding |
| ASHGA5P053021 | 0.014431414 | 0.073620202 | 3.4047199  | up | noncoding |
| ASHGA5P053021 | 0.014431414 | 0.073620202 | 3.4047199  | up | noncoding |
| ASHGA5P047680 | 0.004121103 | 0.041046245 | 17.2528194 | up | noncoding |
| ASHGA5P029059 | 0.006411628 | 0.050954488 | 3.4559258  | up | noncoding |
| ASHGA5P020906 | 0.000736594 | 0.018239926 | 2.7974182  | up | noncoding |
| ASHGA5P052828 | 0.005097905 | 0.04534084  | 2.004114   | up | noncoding |
| ASHGA5P020976 | 0.000437128 | 0.014669266 | 2.5590118  | up | noncoding |
| ASHGA5P047949 | 9.09949E-06 | 0.004010044 | 2.5181329  | up | noncoding |
| ASHGA5P032840 | 0.036317448 | 0.120888213 | 4.2484427  | up | noncoding |
| ASHGA5P014151 | 0.007230429 | 0.053515377 | 3.5335285  | up | noncoding |

|                 |                |                     |      |       |   |
|-----------------|----------------|---------------------|------|-------|---|
| ENST00000446213 | AC133785.1     | GENCODE             | 1273 | chr2  | - |
| ENST00000555850 | RP11-862P13.1  | GENCODE             | 514  | chr14 | - |
| ENST00000555850 | RP11-862P13.1  | GENCODE             | 514  | chr14 | - |
| ENST00000416770 | RPS6KA2-IT1    | GENCODE             | 579  | chr6  | - |
| ENST00000416770 | RPS6KA2-IT1    | GENCODE             | 579  | chr6  | - |
| uc011kxs.1      | DQ587039       | UCSC_knowngene      | 309  | chr8  | - |
| ENST00000579506 | RP11-202D1.3   | GENCODE             | 384  | chr18 | + |
| ENST00000545688 | SNHG1          | GENCODE             | 610  | chr11 | - |
| ENST00000545688 | SNHG1          | GENCODE             | 610  | chr11 | - |
| ENST00000545688 | SNHG1          | GENCODE             | 610  | chr11 | - |
| TCONS_00015426  | XLOC_007053    | LincRNAs identified | 418  | chr8  | - |
| uc002xti.1      | AK098067       | UCSC_knowngene      | 2884 | chr20 | - |
| uc002xti.1      | AK098067       | UCSC_knowngene      | 2884 | chr20 | - |
| uc002xti.1      | AK098067       | UCSC_knowngene      | 2884 | chr20 | - |
| NR_003141       | SNHG4          | RefSeq              | 1100 | chr5  | + |
| NR_003141       | SNHG4          | RefSeq              | 1100 | chr5  | + |
| NR_024534       | ALG3           | RefSeq              | 1513 | chr3  | - |
| NR_024534       | ALG3           | RefSeq              | 1513 | chr3  | - |
| NR_024534       | ALG3           | RefSeq              | 1513 | chr3  | - |
| AA558434        |                | LincRNAs identified | 556  | chrX  | - |
| ENST00000456904 | AP001442.2     | GENCODE             | 430  | chr21 | + |
| ENST00000456904 | AP001442.2     | GENCODE             | 430  | chr21 | + |
| ENST00000456904 | AP001442.2     | GENCODE             | 430  | chr21 | + |
| ENST00000456904 | AP001442.2     | GENCODE             | 430  | chr21 | + |
| ENST00000456904 | AP001442.2     | GENCODE             | 430  | chr21 | + |
| ENST00000456904 | AP001442.2     | GENCODE             | 430  | chr21 | + |
| ENST00000456904 | AP001442.2     | GENCODE             | 430  | chr21 | + |
| ENST00000456904 | AP001442.2     | GENCODE             | 430  | chr21 | + |
| ENST00000456904 | AP001442.2     | GENCODE             | 430  | chr21 | + |
| ENST00000456904 | AP001442.2     | GENCODE             | 430  | chr21 | + |
| ENST00000570096 | RP4-616B8.4    | GENCODE             | 187  | chr20 | - |
| ENST00000570096 | RP4-616B8.4    | GENCODE             | 187  | chr20 | - |
| ENST00000415237 | AC004988.1     | GENCODE             | 1771 | chr7  | - |
| ENST00000415237 | AC004988.1     | GENCODE             | 1771 | chr7  | - |
| ENST00000415237 | AC004988.1     | GENCODE             | 1771 | chr7  | - |
| ENST00000415237 | AC004988.1     | GENCODE             | 1771 | chr7  | - |
| NR_038975       | MIR181A2HG     | RefSeq              | 617  | chr9  | + |
| NR_038975       | MIR181A2HG     | RefSeq              | 617  | chr9  | + |
| NR_027387       | LOC100128822   | RefSeq              | 1438 | chr7  | + |
| ENST00000517714 | RP11-150O12.4  | GENCODE             | 551  | chr8  | - |
| ENST00000523789 | EXTL3-AS1      | GENCODE             | 542  | chr8  | - |
| TCONS_00006773  | XLOC_003406    | LincRNAs identified | 4887 | chr3  | - |
| ENST00000523905 | RP11-347C18.3  | GENCODE             | 709  | chr8  | + |
| ENST00000523905 | RP11-347C18.3  | GENCODE             | 709  | chr8  | + |
| ENST00000523905 | RP11-347C18.3  | GENCODE             | 709  | chr8  | + |
| ENST00000523905 | RP11-347C18.3  | GENCODE             | 709  | chr8  | + |
| ENST00000523905 | RP11-347C18.3  | GENCODE             | 709  | chr8  | + |
| ENST00000521122 | PVT1           | GENCODE             | 221  | chr8  | + |
| ENST00000578757 | C17orf76-AS1   | GENCODE             | 920  | chr17 | + |
| uc001gjk.3      | GAS5           | UCSC_knowngene      | 1696 | chr1  | - |
| uc001gjk.3      | GAS5           | UCSC_knowngene      | 1696 | chr1  | - |
| ENST00000524166 | RP11-37B2.1    | GENCODE             | 836  | chr8  | - |
| ENST00000565648 | RP11-473I1.5   | GENCODE             | 731  | chr16 | - |
| uc003tab.3      | BC038570       | UCSC_knowngene      | 1428 | chr7  | - |
| uc003tab.3      | BC038570       | UCSC_knowngene      | 1428 | chr7  | - |
| NR_038940       | LOC100505839   | RefSeq              | 2023 | chr10 | + |
| ENST00000548631 | RP11-1103G16.1 | GENCODE             | 579  | chr14 | - |
| ENST00000521815 | RP11-255B23.4  | GENCODE             | 367  | chr8  | - |
| ENST00000520891 | RP3-399L15.3   | GENCODE             | 603  | chr6  | + |
| ENST00000522963 | PVT1           | GENCODE             | 568  | chr8  | + |
| TCONS_00013467  | XLOC_006118    | LincRNAs identified | 4569 | chr7  | + |
| ENST00000577743 | RP11-401O9.3   | GENCODE             | 641  | chr17 | + |
| NR_027349       | MIR17HG        | RefSeq              | 927  | chr13 | + |

|           |           |                  |                            |                      |
|-----------|-----------|------------------|----------------------------|----------------------|
| 131593010 | 131594567 |                  | TCATGATCATCTGCTCTAAACACGT  | bidirectional        |
| 67435754  | 67436533  |                  | GATACTTCACTGTCATAAAGCAAGA  | intronic antisense   |
| 67435754  | 67436533  |                  | GATACTTCACTGTCATAAAGCAAGA  | intronic antisense   |
| 166874150 | 166878871 |                  | ATCATGAGACTG(100874353     | intron sense-overlap |
| 166874150 | 166878871 |                  | ATCATGAGACTG(100874353     | intron sense-overlap |
| 12281921  | 12282230  | ENST00000427587, | TTTCAGCCTTGCTAAACTGTCTGAA  | intergenic           |
| 51094840  | 51104092  |                  | GCACAGTGATTGACAATCTCCTTTC  | intergenic           |
| 62620220  | 62622932  |                  | ATAAAAAATGGT.23642         | bidirectional        |
| 62620220  | 62622932  |                  | ATAAAAAATGGT.23642         | bidirectional        |
| 62620220  | 62622932  |                  | ATAAAAAATGGT.23642         | bidirectional        |
| 37264166  | 37270206  |                  | CAATATCATGATTCCTCAGCAGTGC  | intergenic           |
| 45979227  | 45982111  |                  | GGCAATTCAGACAGGTACAGATCTT  | intron sense-overlap |
| 45979227  | 45982111  |                  | GGCAATTCAGACAGGTACAGATCTT  | intron sense-overlap |
| 45979227  | 45982111  |                  | GGCAATTCAGACAGGTACAGATCTT  | intron sense-overlap |
| 138609440 | 138615317 |                  | GATAAGTAACGT.724102        | exon sense-overlap   |
| 138609440 | 138615317 |                  | GATAAGTAACGT.724102        | exon sense-overlap   |
| 183960116 | 183966759 | NM_001006941     | CCTGGCGGAGAC.10195         | exon sense-overlap   |
| 183960116 | 183966759 | NM_001006941     | CCTGGCGGAGAC.10195         | exon sense-overlap   |
| 183960116 | 183966759 | NM_001006941     | CCTGGCGGAGAC.10195         | natural antisense    |
| 125395367 | 125395925 |                  | AGACTACATGATTATGAGATATCTC  | intergenic           |
| 27306611  | 27307584  |                  | CACAATAAATTTACTGAAGTCAGG   | intronic antisense   |
| 27306611  | 27307584  |                  | CACAATAAATTTACTGAAGTCAGG   | intronic antisense   |
| 27306611  | 27307584  |                  | CACAATAAATTTACTGAAGTCAGG   | intronic antisense   |
| 27306611  | 27307584  |                  | CACAATAAATTTACTGAAGTCAGG   | intronic antisense   |
| 27306611  | 27307584  |                  | CACAATAAATTTACTGAAGTCAGG   | intronic antisense   |
| 27306611  | 27307584  |                  | CACAATAAATTTACTGAAGTCAGG   | intronic antisense   |
| 27306611  | 27307584  |                  | CACAATAAATTTACTGAAGTCAGG   | intronic antisense   |
| 27306611  | 27307584  |                  | CACAATAAATTTACTGAAGTCAGG   | intronic antisense   |
| 27306611  | 27307584  |                  | CACAATAAATTTACTGAAGTCAGG   | intronic antisense   |
| 27306611  | 27307584  |                  | CACAATAAATTTACTGAAGTCAGG   | intronic antisense   |
| 27306611  | 27307584  |                  | CACAATAAATTTACTGAAGTCAGG   | intronic antisense   |
| 27306611  | 27307584  |                  | CACAATAAATTTACTGAAGTCAGG   | intronic antisense   |
| 27306611  | 27307584  |                  | CACAATAAATTTACTGAAGTCAGG   | intronic antisense   |
| 37590567  | 37590754  |                  | GCACTGGGCGTTGAAGCAGTGCTTT  | bidirectional        |
| 37590567  | 37590754  |                  | GCACTGGGCGTTGAAGCAGTGCTTT  | bidirectional        |
| 40577725  | 40586527  |                  | CAGGGGATGAATATGTTTCATTACCT | intronic antisense   |
| 40577725  | 40586527  |                  | CAGGGGATGAATATGTTTCATTACCT | intronic antisense   |
| 40577725  | 40586527  |                  | CAGGGGATGAATATGTTTCATTACCT | intronic antisense   |
| 40577725  | 40586527  |                  | CAGGGGATGAATATGTTTCATTACCT | intronic antisense   |
| 127420714 | 127460907 | ENST00000429139  | CTTTTACTGGATC100379345     | intronic antisense   |
| 127420714 | 127460907 | ENST00000429139  | CTTTTACTGGATC100379345     | intronic antisense   |
| 152161208 | 152162630 | ENST00000564834  | GGACGTTTATAT(100128822     | intergenic           |
| 37458054  | 37483391  |                  | AAGAGCCTCTCTTTGGGAAATCTGA  | intergenic           |
| 28555728  | 28558047  |                  | TTGGGCTAAGGATAACTTCCTCTAC  | intronic antisense   |
| 197374633 | 197381275 | TCONS_00007073,  | TGCTGATTGATTGATGAGACTTCTT  | intergenic           |
| 95962264  | 95963624  |                  | CAGAACCAAGAATGTGGCAGAAAG   | intron sense-overlap |
| 95962264  | 95963624  |                  | CAGAACCAAGAATGTGGCAGAAAG   | intron sense-overlap |
| 95962264  | 95963624  |                  | CAGAACCAAGAATGTGGCAGAAAG   | intron sense-overlap |
| 95962264  | 95963624  |                  | CAGAACCAAGAATGTGGCAGAAAG   | intron sense-overlap |
| 128866973 | 128902987 |                  | TTCGTATTTTGCC5820          | intergenic           |
| 16342351  | 16344523  | ENST00000497774  | GTTAAGAAATGT(125144        | intergenic           |
| 173833038 | 173837125 | ENST00000442067  | TTTTAAGTGTTGI60674         | bidirectional        |
| 173833038 | 173837125 | ENST00000442067  | TTTTAAGTGTTGI60674         | bidirectional        |
| 90623584  | 90629386  |                  | CACAGTGCTAGTAAGTAATGAATGT  | intergenic           |
| 9199690   | 9201031   |                  | TGTCCTCTCTTAAATACATAGGACA  | intronic antisense   |
| 29553839  | 29603273  |                  | TAATTACCCTAGAACATAAATTTCA  | natural antisense    |
| 29553839  | 29603273  |                  | TAATTACCCTAGAACATAAATTTCA  | natural antisense    |
| 105506536 | 105515167 |                  | GGGGATTATGAT(100505839     | intronic antisense   |
| 30919565  | 30943276  |                  | TGCTGAGATTCCCATTGGTTTCCCA  | intergenic           |
| 128197879 | 128215467 |                  | CTATCCCAAGATAACACTAACAAAG  | intergenic           |
| 114292659 | 114316979 | ENST00000521888  | TCCCGCCAAGCCGACCACGTGCCG   | intronic antisense   |
| 128808058 | 128903041 | uc003ysj.2       | TCTCCATTATTTG5820          | intergenic           |
| 63170710  | 63176135  |                  | AAATCATAGAGAGTCATTGGCCAAT  | intergenic           |
| 10223708  | 10244775  |                  | CCTGCTTATCTCTAAAGAGTAAGTA  | natural antisense    |
| 92000073  | 92006829  |                  | CCTCTAAAAGGC.407975        | intergenic           |

|                 |          |                          |           |           |
|-----------------|----------|--------------------------|-----------|-----------|
| ENST00000409359 | ARHGEF4  | Rho guanine nucleoti+    | 131595027 | 131704803 |
| NM_001024218    | GPHN     | gephyrin isoform 2 +     | 66974124  | 67648525  |
| NM_020806       | GPHN     | gephyrin isoform 1 +     | 66974124  | 67648525  |
| NM_001006932    | RPS6KA2  | ribosomal protein S6 -   | 166822853 | 167275771 |
| NM_021135       | RPS6KA2  | ribosomal protein S6 -   | 166822853 | 167040726 |
| NM_001012662    | SLC3A2   | 4F2 cell-surface antiξ + | 62623483  | 62656355  |
| NM_001012664    | SLC3A2   | 4F2 cell-surface antiξ + | 62623483  | 62656355  |
| NM_002394       | SLC3A2   | 4F2 cell-surface antiξ + | 62623483  | 62656355  |
| NM_012408       | ZMYND8   | protein kinase C-binc -  | 45838380  | 45985474  |
| NM_183047       | ZMYND8   | protein kinase C-binc -  | 45838380  | 45985474  |
| NM_183048       | ZMYND8   | protein kinase C-binc -  | 45838380  | 45985474  |
| NM_001194954    | MATR3    | matrin-3 isoform a +     | 138609440 | 138667366 |
| NM_199189       | MATR3    | matrin-3 isoform a +     | 138609440 | 138667366 |
| NM_001006941    | ALG3     | dol-P-Man:Man(5)G -      | 183960116 | 183967313 |
| NM_005787       | ALG3     | dol-P-Man:Man(5)G -      | 183960116 | 183966759 |
| NM_138345       | VWA5B2   | von Willebrand facto +   | 183948316 | 183960117 |
| NM_000484       | APP      | amyloid beta A4 prot -   | 27252860  | 27543138  |
| NM_001136016    | APP      | amyloid beta A4 prot -   | 27252860  | 27512708  |
| NM_001136129    | APP      | amyloid beta A4 prot -   | 27252860  | 27543138  |
| NM_001136130    | APP      | amyloid beta A4 prot -   | 27252860  | 27543138  |
| NM_001136131    | APP      | amyloid beta A4 prot -   | 27252860  | 27543446  |
| NM_001204301    | APP      | amyloid beta A4 prot -   | 27252860  | 27543138  |
| NM_001204302    | APP      | amyloid beta A4 prot -   | 27252860  | 27543138  |
| NM_001204303    | APP      | amyloid beta A4 prot -   | 27252860  | 27543138  |
| NM_201413       | APP      | amyloid beta A4 prot -   | 27252860  | 27543138  |
| NM_201414       | APP      | amyloid beta A4 prot -   | 27252860  | 27543138  |
| NM_001190809    | DHX35    | probable ATP-depen +     | 37590980  | 37668366  |
| NM_021931       | DHX35    | probable ATP-depen +     | 37590980  | 37668366  |
| NM_001193311    | C7orf10  | caiB/baiF CoA-transi +   | 40174574  | 40900366  |
| NM_001193312    | C7orf10  | caiB/baiF CoA-transi +   | 40174574  | 40900366  |
| NM_001193313    | C7orf10  | caiB/baiF CoA-transi +   | 40174574  | 40900366  |
| NM_024728       | C7orf10  | caiB/baiF CoA-transi +   | 40174574  | 40900366  |
| NM_001489       | NR6A1    | nuclear receptor subf -  | 127284702 | 127533576 |
| NM_033334       | NR6A1    | nuclear receptor subf -  | 127284702 | 127533576 |
| ENST00000523149 | EXTL3    | exostoses (multiple)- +  | 28480245  | 28608420  |
| ENST00000396111 | NDUFAF6  | NADH dehydrogena: +      | 95908043  | 96070938  |
| ENST00000396113 | NDUFAF6  | NADH dehydrogena: +      | 95908040  | 96070938  |
| ENST00000519136 | NDUFAF6  | NADH dehydrogena: +      | 95908064  | 96059259  |
| ENST00000523378 | NDUFAF6  | NADH dehydrogena: +      | 95907994  | 96059318  |
| NM_001122770    | ZBTB37   | zinc finger and BTB +    | 173837492 | 173855774 |
| NM_032522       | ZBTB37   | zinc finger and BTB +    | 173837492 | 173842778 |
| NM_014117       | C16orf72 | UPF0472 protein C1 +     | 9185536   | 9213555   |
| NM_001039936    | CHN2     | beta-chimaerin isofo +   | 29519485  | 29553944  |
| NM_004067       | CHN2     | beta-chimaerin isofo +   | 29234120  | 29553944  |
| NM_014631       | SH3PXD2A | SH3 and PX domain- -     | 105353783 | 105615164 |
| ENST00000522371 | HDAC2    | histone deacetylase 2 -  | 114277792 | 114332472 |
| NM_003802       | MYH13    | myosin-13 -              | 10204182  | 10276322  |



|             |             |           |           |           |           |
|-------------|-------------|-----------|-----------|-----------|-----------|
| 93.480313   | 5           | 5.534945  | 2.363479  | 42.933525 | 15.904529 |
| 22.019373   | 7.126396    | 4.134129  | 2.832356  | 24.610182 | 28.143469 |
| 22.019373   | 7.126396    | 4.134129  | 2.832356  | 24.610182 | 28.143469 |
| 21.30333    | 7.367176    | 4.020672  | 2.991443  | 21.566395 | 17.27053  |
| 21.30333    | 7.367176    | 4.020672  | 2.991443  | 21.566395 | 17.27053  |
| 8389.057717 | 1880.605633 | 12.590497 | 11.266496 | 8902.202  | 9725.854  |
| 41.67152    | 12.197282   | 4.958388  | 3.872438  | 51.139862 | 21.71797  |
| 646.486125  | 185.219512  | 8.824397  | 7.776601  | 541.1535  | 430.04773 |
| 646.486125  | 185.219512  | 8.824397  | 7.776601  | 541.1535  | 430.04773 |
| 646.486125  | 185.219512  | 8.824397  | 7.776601  | 541.1535  | 430.04773 |
| 45.525424   | 7.598625    | 5.175184  | 3.003603  | 43.49231  | 37.691826 |
| 350.858437  | 103.69279   | 7.978467  | 6.564906  | 463.03198 | 306.68716 |
| 350.858437  | 103.69279   | 7.978467  | 6.564906  | 463.03198 | 306.68716 |
| 350.858437  | 103.69279   | 7.978467  | 6.564906  | 463.03198 | 306.68716 |
| 131.327196  | 20.178154   | 6.488457  | 4.524167  | 91.306206 | 135.04918 |
| 131.327196  | 20.178154   | 6.488457  | 4.524167  | 91.306206 | 135.04918 |
| 66.843167   | 8.558783    | 5.71047   | 3.289584  | 63.038857 | 76.83882  |
| 66.843167   | 8.558783    | 5.71047   | 3.289584  | 63.038857 | 76.83882  |
| 66.843167   | 8.558783    | 5.71047   | 3.289584  | 63.038857 | 76.83882  |
| 1022.06504  | 15.881386   | 7.437836  | 3.389473  | 1261.3989 | 4.9999995 |
| 51.947701   | 16.207372   | 5.360857  | 4.171671  | 47.420174 | 47.219654 |
| 51.947701   | 16.207372   | 5.360857  | 4.171671  | 47.420174 | 47.219654 |
| 51.947701   | 16.207372   | 5.360857  | 4.171671  | 47.420174 | 47.219654 |
| 51.947701   | 16.207372   | 5.360857  | 4.171671  | 47.420174 | 47.219654 |
| 51.947701   | 16.207372   | 5.360857  | 4.171671  | 47.420174 | 47.219654 |
| 51.947701   | 16.207372   | 5.360857  | 4.171671  | 47.420174 | 47.219654 |
| 51.947701   | 16.207372   | 5.360857  | 4.171671  | 47.420174 | 47.219654 |
| 51.947701   | 16.207372   | 5.360857  | 4.171671  | 47.420174 | 47.219654 |
| 51.947701   | 16.207372   | 5.360857  | 4.171671  | 47.420174 | 47.219654 |
| 51.947701   | 16.207372   | 5.360857  | 4.171671  | 47.420174 | 47.219654 |
| 51.947701   | 16.207372   | 5.360857  | 4.171671  | 47.420174 | 47.219654 |
| 51.947701   | 16.207372   | 5.360857  | 4.171671  | 47.420174 | 47.219654 |
| 51.947701   | 16.207372   | 5.360857  | 4.171671  | 47.420174 | 47.219654 |
| 292.945022  | 82.769246   | 7.754662  | 6.687059  | 355.44043 | 245.18834 |
| 292.945022  | 82.769246   | 7.754662  | 6.687059  | 355.44043 | 245.18834 |
| 66.910227   | 6.678513    | 5.53327   | 2.807782  | 63.42931  | 13.052479 |
| 66.910227   | 6.678513    | 5.53327   | 2.807782  | 63.42931  | 13.052479 |
| 66.910227   | 6.678513    | 5.53327   | 2.807782  | 63.42931  | 13.052479 |
| 66.910227   | 6.678513    | 5.53327   | 2.807782  | 63.42931  | 13.052479 |
| 58.602426   | 9.120491    | 5.140452  | 3.305035  | 80.20778  | 132.41603 |
| 58.602426   | 9.120491    | 5.140452  | 3.305035  | 80.20778  | 132.41603 |
| 4299.714117 | 1120.67505  | 11.515618 | 10.501942 | 3621.2363 | 2779.3738 |
| 22.51272    | 5.165932    | 4.179919  | 2.43622   | 23.387978 | 20.08071  |
| 148.442563  | 47.593618   | 6.856971  | 5.749135  | 172.24217 | 168.19722 |
| 6355.994133 | 920.662175  | 11.858491 | 10.163018 | 3511.2317 | 3083.6301 |
| 48.246573   | 13.033233   | 5.210467  | 3.646736  | 62.35257  | 57.944843 |
| 48.246573   | 13.033233   | 5.210467  | 3.646736  | 62.35257  | 57.944843 |
| 48.246573   | 13.033233   | 5.210467  | 3.646736  | 62.35257  | 57.944843 |
| 48.246573   | 13.033233   | 5.210467  | 3.646736  | 62.35257  | 57.944843 |
| 84.833912   | 18.954445   | 5.97619   | 4.43605   | 73.14876  | 52.3169   |
| 1454.025067 | 324.436357  | 9.991207  | 8.645394  | 1789.2196 | 2594.845  |
| 6564.263    | 891.099812  | 12.188371 | 10.162042 | 5624.518  | 4858.849  |
| 6564.263    | 891.099812  | 12.188371 | 10.162042 | 5624.518  | 4858.849  |
| 158.60827   | 23.635196   | 6.35946   | 4.731208  | 56.46914  | 67.885925 |
| 27.918839   | 10.454915   | 4.465808  | 3.396529  | 28.689968 | 17.975882 |
| 188.022202  | 39.683615   | 6.816145  | 5.048609  | 285.4579  | 84.19487  |
| 188.022202  | 39.683615   | 6.816145  | 5.048609  | 285.4579  | 84.19487  |
| 1201.395742 | 32.826749   | 9.151669  | 5.042908  | 591.03625 | 38.4936   |
| 90.733747   | 16.792863   | 5.902426  | 4.113354  | 154.01028 | 89.73399  |
| 50.406596   | 11.40343    | 5.279727  | 3.795631  | 54.21869  | 51.4567   |
| 399.374542  | 133.12689   | 8.257369  | 7.254405  | 348.49265 | 365.92175 |
| 17.904217   | 5.242012    | 3.809106  | 2.45352   | 19.356592 | 15.16749  |
| 20.654976   | 5.769641    | 4.02929   | 2.696936  | 23.64496  | 24.438745 |
| 45.411602   | 6.186866    | 4.67939   | 2.592456  | 46.86515  | 4.9999995 |
| 607.5465    | 97.936165   | 8.742862  | 6.921752  | 866.33    | 912.1824  |

|           |           |           |           |           |           |
|-----------|-----------|-----------|-----------|-----------|-----------|
| 56.3463   | 23.536892 | 226.9073  | 195.25333 | 4.9999995 | 4.9999995 |
| 18.71308  | 22.33346  | 18.661325 | 19.65472  | 4.9999995 | 4.9999995 |
| 18.71308  | 22.33346  | 18.661325 | 19.65472  | 4.9999995 | 4.9999995 |
| 13.416318 | 15.528892 | 27.954607 | 32.08324  | 8.071006  | 4.9999995 |
| 13.416318 | 15.528892 | 27.954607 | 32.08324  | 8.071006  | 4.9999995 |
| 7272.2163 | 6442.216  | 8427.12   | 9564.738  | 1750.9393 | 1510.4337 |
| 40.67345  | 74.767555 | 23.91309  | 37.81719  | 14.47827  | 7.4999285 |
| 581.9693  | 319.82742 | 996.0362  | 1009.8826 | 137.4715  | 103.39741 |
| 581.9693  | 319.82742 | 996.0362  | 1009.8826 | 137.4715  | 103.39741 |
| 581.9693  | 319.82742 | 996.0362  | 1009.8826 | 137.4715  | 103.39741 |
| 42.511337 | 47.316437 | 53.759983 | 48.380653 | 7.366087  | 4.9999995 |
| 580.05774 | 309.65134 | 166.57216 | 279.15024 | 147.31837 | 30.890738 |
| 580.05774 | 309.65134 | 166.57216 | 279.15024 | 147.31837 | 30.890738 |
| 580.05774 | 309.65134 | 166.57216 | 279.15024 | 147.31837 | 30.890738 |
| 38.677002 | 112.99137 | 198.0664  | 211.87302 | 12.37475  | 9.673317  |
| 38.677002 | 112.99137 | 198.0664  | 211.87302 | 12.37475  | 9.673317  |
| 50.97804  | 72.98302  | 60.96391  | 76.256355 | 8.391361  | 5.534046  |
| 50.97804  | 72.98302  | 60.96391  | 76.256355 | 8.391361  | 5.534046  |
| 50.97804  | 72.98302  | 60.96391  | 76.256355 | 8.391361  | 5.534046  |
| 2649.4885 | 1528.491  | 4.9999995 | 683.01184 | 4.9999995 | 4.9999995 |
| 55.71165  | 58.026413 | 41.41226  | 61.896053 | 11.187442 | 9.199626  |
| 55.71165  | 58.026413 | 41.41226  | 61.896053 | 11.187442 | 9.199626  |
| 55.71165  | 58.026413 | 41.41226  | 61.896053 | 11.187442 | 9.199626  |
| 55.71165  | 58.026413 | 41.41226  | 61.896053 | 11.187442 | 9.199626  |
| 55.71165  | 58.026413 | 41.41226  | 61.896053 | 11.187442 | 9.199626  |
| 55.71165  | 58.026413 | 41.41226  | 61.896053 | 11.187442 | 9.199626  |
| 55.71165  | 58.026413 | 41.41226  | 61.896053 | 11.187442 | 9.199626  |
| 55.71165  | 58.026413 | 41.41226  | 61.896053 | 11.187442 | 9.199626  |
| 55.71165  | 58.026413 | 41.41226  | 61.896053 | 11.187442 | 9.199626  |
| 55.71165  | 58.026413 | 41.41226  | 61.896053 | 11.187442 | 9.199626  |
| 55.71165  | 58.026413 | 41.41226  | 61.896053 | 11.187442 | 9.199626  |
| 468.68402 | 165.90831 | 254.79205 | 267.65698 | 74.01574  | 54.42824  |
| 468.68402 | 165.90831 | 254.79205 | 267.65698 | 74.01574  | 54.42824  |
| 88.54673  | 72.23098  | 69.10701  | 95.09485  | 5.1202173 | 4.9999995 |
| 88.54673  | 72.23098  | 69.10701  | 95.09485  | 5.1202173 | 4.9999995 |
| 88.54673  | 72.23098  | 69.10701  | 95.09485  | 5.1202173 | 4.9999995 |
| 88.54673  | 72.23098  | 69.10701  | 95.09485  | 5.1202173 | 4.9999995 |
| 13.229952 | 23.650534 | 51.683292 | 50.42697  | 9.984784  | 8.078903  |
| 13.229952 | 23.650534 | 51.683292 | 50.42697  | 9.984784  | 8.078903  |
| 4079.4548 | 7542.8335 | 2048.233  | 5727.1533 | 1206.9851 | 1074.2717 |
| 25.86623  | 22.513414 | 24.510967 | 18.71702  | 4.9999995 | 4.9999995 |
| 124.80628 | 138.44899 | 145.73271 | 141.22801 | 47.080177 | 21.437443 |
| 3536.031  | 15703.441 | 2426.444  | 9875.187  | 916.3089  | 429.8667  |
| 41.293224 | 29.874746 | 52.27559  | 45.738464 | 20.212767 | 4.9999995 |
| 41.293224 | 29.874746 | 52.27559  | 45.738464 | 20.212767 | 4.9999995 |
| 41.293224 | 29.874746 | 52.27559  | 45.738464 | 20.212767 | 4.9999995 |
| 41.293224 | 29.874746 | 52.27559  | 45.738464 | 20.212767 | 4.9999995 |
| 70.661095 | 154.47083 | 54.859097 | 103.54679 | 13.013978 | 17.443794 |
| 959.80475 | 1298.537  | 833.61615 | 1248.1279 | 294.3003  | 234.96364 |
| 6463.189  | 9854.905  | 4314.11   | 8270.007  | 721.317   | 629.74835 |
| 6463.189  | 9854.905  | 4314.11   | 8270.007  | 721.317   | 629.74835 |
| 44.1767   | 440.88623 | 57.489166 | 284.74246 | 17.479078 | 16.99504  |
| 26.702272 | 41.971214 | 23.81603  | 28.357666 | 14.084179 | 4.9999995 |
| 481.99048 | 91.40249  | 73.19089  | 111.89658 | 38.740063 | 7.3127403 |
| 481.99048 | 91.40249  | 73.19089  | 111.89658 | 38.740063 | 7.3127403 |
| 1094.6561 | 1568.62   | 1830.1239 | 2085.4446 | 12.62307  | 16.36195  |
| 42.268364 | 27.207708 | 131.11864 | 100.0635  | 27.224863 | 14.457039 |
| 33.822685 | 39.3613   | 68.23471  | 55.34549  | 12.065369 | 8.917721  |
| 424.5385  | 364.9275  | 408.02182 | 484.34503 | 170.08841 | 75.70478  |
| 11.30732  | 20.827433 | 14.727421 | 26.039047 | 6.452072  | 4.9999995 |
| 23.22903  | 18.691462 | 12.882501 | 21.04316  | 5.998743  | 5.3945346 |
| 78.211716 | 15.459639 | 65.535835 | 61.39727  | 4.9999995 | 4.9999995 |
| 735.7998  | 317.16623 | 386.41223 | 427.38834 | 84.174446 | 94.87456  |

|           |           |           |           |           |            |
|-----------|-----------|-----------|-----------|-----------|------------|
| 4.9999995 | 4.9999995 | 4.9999995 | 4.9999995 | 4.9644055 | 4.0103726  |
| 12.990769 | 5.328015  | 4.9999995 | 9.439593  | 4.163686  | 4.7584667  |
| 12.990769 | 5.328015  | 4.9999995 | 9.439593  | 4.163686  | 4.7584667  |
| 12.18428  | 6.1039963 | 7.3911967 | 5.45258   | 3.9699037 | 4.114166   |
| 12.18428  | 6.1039963 | 7.3911967 | 5.45258   | 3.9699037 | 4.114166   |
| 2082.0479 | 1585.8143 | 2661.453  | 1692.9456 | 12.640489 | 12.786555  |
| 11.882131 | 15.512499 | 11.70105  | 12.109811 | 5.209098  | 4.4042945  |
| 199.50027 | 140.75511 | 349.56735 | 180.62543 | 8.59467   | 8.438907   |
| 199.50027 | 140.75511 | 349.56735 | 180.62543 | 8.59467   | 8.438907   |
| 199.50027 | 140.75511 | 349.56735 | 180.62543 | 8.59467   | 8.438907   |
| 4.9999995 | 12.721012 | 9.479905  | 6.024745  | 4.9853845 | 5.14075    |
| 257.56638 | 29.390167 | 103.7782  | 53.212883 | 8.377992  | 7.988911   |
| 257.56638 | 29.390167 | 103.7782  | 53.212883 | 8.377992  | 7.988911   |
| 257.56638 | 29.390167 | 103.7782  | 53.212883 | 8.377992  | 7.988911   |
| 15.544708 | 24.532639 | 30.965668 | 27.977844 | 6.0604076 | 6.8449945  |
| 15.544708 | 24.532639 | 30.965668 | 27.977844 | 6.0604076 | 6.8449945  |
| 13.015921 | 6.199467  | 12.21724  | 5.9946613 | 5.521658  | 6.074525   |
| 13.015921 | 6.199467  | 12.21724  | 5.9946613 | 5.521658  | 6.074525   |
| 13.015921 | 6.199467  | 12.21724  | 5.9946613 | 5.521658  | 6.074525   |
| 4.9999995 | 52.430595 | 4.9999995 | 22.857723 | 9.825914  | 2.3499577  |
| 8.456173  | 17.444998 | 31.605783 | 19.350208 | 5.109831  | 5.4350786  |
| 8.456173  | 17.444998 | 31.605783 | 19.350208 | 5.109831  | 5.4350786  |
| 8.456173  | 17.444998 | 31.605783 | 19.350208 | 5.109831  | 5.4350786  |
| 8.456173  | 17.444998 | 31.605783 | 19.350208 | 5.109831  | 5.4350786  |
| 8.456173  | 17.444998 | 31.605783 | 19.350208 | 5.109831  | 5.4350786  |
| 8.456173  | 17.444998 | 31.605783 | 19.350208 | 5.109831  | 5.4350786  |
| 8.456173  | 17.444998 | 31.605783 | 19.350208 | 5.109831  | 5.4350786  |
| 8.456173  | 17.444998 | 31.605783 | 19.350208 | 5.109831  | 5.4350786  |
| 8.456173  | 17.444998 | 31.605783 | 19.350208 | 5.109831  | 5.4350786  |
| 8.456173  | 17.444998 | 31.605783 | 19.350208 | 5.109831  | 5.4350786  |
| 8.456173  | 17.444998 | 31.605783 | 19.350208 | 5.109831  | 5.4350786  |
| 8.456173  | 17.444998 | 31.605783 | 19.350208 | 5.109831  | 5.4350786  |
| 8.456173  | 17.444998 | 31.605783 | 19.350208 | 5.109831  | 5.4350786  |
| 96.82903  | 87.914185 | 104.59483 | 78.83345  | 8.018048  | 7.671642   |
| 96.82903  | 87.914185 | 104.59483 | 78.83345  | 8.018048  | 7.671642   |
| 8.60255   | 11.052171 | 4.9999995 | 5.296138  | 5.529325  | 3.7482593  |
| 8.60255   | 11.052171 | 4.9999995 | 5.296138  | 5.529325  | 3.7482593  |
| 8.60255   | 11.052171 | 4.9999995 | 5.296138  | 5.529325  | 3.7482593  |
| 8.60255   | 11.052171 | 4.9999995 | 5.296138  | 5.529325  | 3.7482593  |
| 4.9999995 | 4.9999995 | 18.153198 | 8.506061  | 5.872989  | 6.8170834  |
| 4.9999995 | 4.9999995 | 18.153198 | 8.506061  | 5.872989  | 6.8170834  |
| 1425.9568 | 806.70807 | 1349.8768 | 860.25183 | 11.338854 | 11.0246725 |
| 5.9955926 | 4.9999995 | 4.9999995 | 4.9999995 | 4.0875463 | 4.3044343  |
| 93.732315 | 45.55535  | 46.18479  | 31.571632 | 6.975384  | 7.157064   |
| 1450.175  | 1059.9391 | 877.46155 | 790.2218  | 11.303015 | 11.176275  |
| 25.26781  | 7.292191  | 11.449231 | 8.977402  | 5.507208  | 5.70024    |
| 25.26781  | 7.292191  | 11.449231 | 8.977402  | 5.507208  | 5.70024    |
| 25.26781  | 7.292191  | 11.449231 | 8.977402  | 5.507208  | 5.70024    |
| 25.26781  | 7.292191  | 11.449231 | 8.977402  | 5.507208  | 5.70024    |
| 7.1945205 | 32.5263   | 21.927217 | 21.62086  | 5.736808  | 5.5724835  |
| 324.4311  | 231.68892 | 562.89    | 298.34418 | 10.322714 | 10.911717  |
| 777.96857 | 972.1451  | 1344.9619 | 900.45795 | 11.961581 | 11.790485  |
| 777.96857 | 972.1451  | 1344.9619 | 900.45795 | 11.961581 | 11.790485  |
| 13.286149 | 51.420334 | 15.369093 | 27.261484 | 5.357065  | 5.911976   |
| 19.919231 | 6.028212  | 7.713092  | 9.984779  | 4.390099  | 4.164884   |
| 88.411385 | 9.460082  | 69.15324  | 25.024178 | 7.7013855 | 6.200468   |
| 88.411385 | 9.460082  | 69.15324  | 25.024178 | 7.7013855 | 6.200468   |
| 10.206281 | 67.93023  | 41.479736 | 48.35923  | 8.734058  | 5.1675377  |
| 29.153067 | 6.1721544 | 16.861748 | 6.8883066 | 6.809992  | 6.2835765  |
| 10.196399 | 14.683931 | 9.53767   | 13.019489 | 5.2947197 | 5.550072   |
| 264.42377 | 101.24852 | 103.69087 | 83.60499  | 7.9930224 | 8.2185335  |
| 4.9999995 | 4.9999995 | 4.9999995 | 4.9999995 | 3.8165076 | 3.9438212  |
| 8.224569  | 4.9999995 | 4.9999995 | 4.9999995 | 4.1048446 | 4.5681486  |
| 4.9999995 | 12.1212   | 4.9999995 | 4.9999995 | 5.0930414 | 2.3499577  |
| 66.65602  | 155.02255 | 94.810074 | 92.07934  | 9.294816  | 9.497339   |

|           |           |           |           |           |           |
|-----------|-----------|-----------|-----------|-----------|-----------|
| 5.500935  | 4.0679245 | 7.5799675 | 7.086062  | 2.3467326 | 2.4279919 |
| 3.9066975 | 3.9826758 | 4.12796   | 3.86529   | 2.3467326 | 2.4279919 |
| 3.9066975 | 3.9826758 | 4.12796   | 3.86529   | 2.3467326 | 2.4279919 |
| 3.4182634 | 3.3974843 | 4.6756616 | 4.5485506 | 3.2149792 | 2.4279919 |
| 3.4182634 | 3.3974843 | 4.6756616 | 4.5485506 | 3.2149792 | 2.4279919 |
| 12.453372 | 12.307928 | 12.736248 | 12.618389 | 11.081052 | 11.439903 |
| 5.030363  | 5.86506   | 4.469638  | 4.771877  | 4.085673  | 3.668214  |
| 8.823429  | 7.998871  | 9.699494  | 9.391014  | 7.329967  | 7.5403786 |
| 8.823429  | 7.998871  | 9.699494  | 9.391014  | 7.329967  | 7.5403786 |
| 8.823429  | 7.998871  | 9.699494  | 9.391014  | 7.329967  | 7.5403786 |
| 5.087546  | 5.1645646 | 5.56461   | 5.108251  | 3.0732775 | 2.4279919 |
| 8.819718  | 7.9536505 | 7.1527667 | 7.5777636 | 7.439103  | 5.7869215 |
| 8.819718  | 7.9536505 | 7.1527667 | 7.5777636 | 7.439103  | 5.7869215 |
| 8.819718  | 7.9536505 | 7.1527667 | 7.5777636 | 7.439103  | 5.7869215 |
| 4.9588814 | 6.47958   | 7.3939986 | 7.1928806 | 3.8583853 | 4.054921  |
| 4.9588814 | 6.47958   | 7.3939986 | 7.1928806 | 3.8583853 | 4.054921  |
| 5.355707  | 5.8287396 | 5.739109  | 5.743083  | 3.2783608 | 3.2062829 |
| 5.355707  | 5.8287396 | 5.739109  | 5.743083  | 3.2783608 | 3.2062829 |
| 5.355707  | 5.8287396 | 5.739109  | 5.743083  | 3.2783608 | 3.2062829 |
| 11.014019 | 10.261244 | 2.3344212 | 8.841461  | 2.3467326 | 2.4279919 |
| 5.4854183 | 5.476534  | 5.2141614 | 5.444116  | 3.7141337 | 3.9765046 |
| 5.4854183 | 5.476534  | 5.2141614 | 5.444116  | 3.7141337 | 3.9765046 |
| 5.4854183 | 5.476534  | 5.2141614 | 5.444116  | 3.7141337 | 3.9765046 |
| 5.4854183 | 5.476534  | 5.2141614 | 5.444116  | 3.7141337 | 3.9765046 |
| 5.4854183 | 5.476534  | 5.2141614 | 5.444116  | 3.7141337 | 3.9765046 |
| 5.4854183 | 5.476534  | 5.2141614 | 5.444116  | 3.7141337 | 3.9765046 |
| 5.4854183 | 5.476534  | 5.2141614 | 5.444116  | 3.7141337 | 3.9765046 |
| 5.4854183 | 5.476534  | 5.2141614 | 5.444116  | 3.7141337 | 3.9765046 |
| 5.4854183 | 5.476534  | 5.2141614 | 5.444116  | 3.7141337 | 3.9765046 |
| 5.4854183 | 5.476534  | 5.2141614 | 5.444116  | 3.7141337 | 3.9765046 |
| 5.4854183 | 5.476534  | 5.2141614 | 5.444116  | 3.7141337 | 3.9765046 |
| 8.52075   | 7.048739  | 7.752356  | 7.5164394 | 6.4356647 | 6.6168866 |
| 8.52075   | 7.048739  | 7.752356  | 7.5164394 | 6.4356647 | 6.6168866 |
| 6.14995   | 5.811692  | 5.908574  | 6.0518217 | 2.573803  | 2.4279919 |
| 6.14995   | 5.811692  | 5.908574  | 6.0518217 | 2.573803  | 2.4279919 |
| 6.14995   | 5.811692  | 5.908574  | 6.0518217 | 2.573803  | 2.4279919 |
| 6.14995   | 5.811692  | 5.908574  | 6.0518217 | 2.573803  | 2.4279919 |
| 3.3984115 | 4.075333  | 5.513158  | 5.1657352 | 3.5430317 | 3.7806046 |
| 3.3984115 | 4.075333  | 5.513158  | 5.1657352 | 3.5430317 | 3.7806046 |
| 11.636798 | 12.52699  | 10.713436 | 11.852957 | 10.535038 | 10.949598 |
| 4.3837647 | 3.998289  | 4.503815  | 3.8016653 | 2.3467326 | 2.4279919 |
| 6.6416154 | 6.787432  | 6.9676757 | 6.6126523 | 5.7876873 | 5.2535625 |
| 11.425573 | 13.600112 | 10.966507 | 12.679465 | 10.157421 | 9.616259  |
| 5.0499916 | 4.446186  | 5.528633  | 5.0305443 | 4.5710063 | 2.4279919 |
| 5.0499916 | 4.446186  | 5.528633  | 5.0305443 | 4.5710063 | 2.4279919 |
| 5.0499916 | 4.446186  | 5.528633  | 5.0305443 | 4.5710063 | 2.4279919 |
| 5.0499916 | 4.446186  | 5.528633  | 5.0305443 | 4.5710063 | 2.4279919 |
| 5.831658  | 6.9461403 | 5.5942783 | 6.1757693 | 3.9277487 | 4.9453607 |
| 9.5384445 | 10.025298 | 9.441012  | 9.708057  | 8.464608  | 8.725792  |
| 12.305031 | 12.897419 | 11.775125 | 12.400587 | 9.7928095 | 10.158717 |
| 12.305031 | 12.897419 | 11.775125 | 12.400587 | 9.7928095 | 10.158717 |
| 5.1460795 | 8.473957  | 5.65751   | 7.610174  | 4.365209  | 4.904441  |
| 4.428035  | 4.977532  | 4.4629774 | 4.371319  | 4.0437183 | 2.4279919 |
| 8.561582  | 6.1615076 | 5.988676  | 6.283251  | 5.507947  | 3.6302216 |
| 8.561582  | 6.1615076 | 5.988676  | 6.283251  | 5.507947  | 3.6302216 |
| 9.721865  | 10.309741 | 10.542946 | 10.433864 | 3.884795  | 4.84819   |
| 5.0793104 | 4.303543  | 6.8127427 | 6.125393  | 5.004211  | 4.663981  |
| 4.7654424 | 4.876692  | 5.892806  | 5.2986283 | 3.8238106 | 3.9314744 |
| 8.383522  | 8.189564  | 8.413831  | 8.345742  | 7.656013  | 7.087643  |
| 3.1722012 | 3.8669095 | 3.8098526 | 4.2453465 | 2.8869739 | 2.4279919 |
| 4.2293096 | 3.6891792 | 3.6263895 | 3.9578702 | 2.787435  | 3.166536  |
| 5.9727454 | 3.3886535 | 5.836652  | 5.4352903 | 2.3467326 | 2.4279919 |
| 9.171591  | 7.986807  | 8.338986  | 8.16763   | 6.6199603 | 7.424053  |

|           |           |            |           |
|-----------|-----------|------------|-----------|
| 2.350709  | 2.3408759 | 2.3618152  | 2.352752  |
| 3.7765641 | 2.5578697 | 2.3618152  | 3.523165  |
| 3.7765641 | 2.5578697 | 2.3618152  | 3.523165  |
| 3.6940415 | 2.714133  | 3.1838622  | 2.713648  |
| 3.6940415 | 2.714133  | 3.1838622  | 2.713648  |
| 10.973721 | 11.151194 | 11.631184  | 11.321924 |
| 3.6597424 | 4.0969563 | 3.8236775  | 3.9003673 |
| 7.590277  | 7.5092316 | 8.683072   | 8.006677  |
| 7.590277  | 7.5092316 | 8.683072   | 8.006677  |
| 7.590277  | 7.5092316 | 8.683072   | 8.006677  |
| 2.350709  | 3.785805  | 3.531699   | 2.852138  |
| 7.957231  | 5.0870504 | 6.954068   | 6.1650643 |
| 7.957231  | 5.0870504 | 6.954068   | 6.1650643 |
| 7.957231  | 5.0870504 | 6.954068   | 6.1650643 |
| 4.022765  | 4.8016486 | 5.226414   | 5.180871  |
| 4.022765  | 4.8016486 | 5.226414   | 5.180871  |
| 3.780518  | 2.7360554 | 3.8886185  | 2.8476713 |
| 3.780518  | 2.7360554 | 3.8886185  | 2.8476713 |
| 3.780518  | 2.7360554 | 3.8886185  | 2.8476713 |
| 2.350709  | 5.9891486 | 2.3618152  | 4.860441  |
| 3.2085156 | 4.268133  | 5.2574396  | 4.605299  |
| 3.2085156 | 4.268133  | 5.2574396  | 4.605299  |
| 3.2085156 | 4.268133  | 5.2574396  | 4.605299  |
| 3.2085156 | 4.268133  | 5.2574396  | 4.605299  |
| 3.2085156 | 4.268133  | 5.2574396  | 4.605299  |
| 3.2085156 | 4.268133  | 5.2574396  | 4.605299  |
| 3.2085156 | 4.268133  | 5.2574396  | 4.605299  |
| 3.2085156 | 4.268133  | 5.2574396  | 4.605299  |
| 3.2085156 | 4.268133  | 5.2574396  | 4.605299  |
| 3.2085156 | 4.268133  | 5.2574396  | 4.605299  |
| 6.5597563 | 6.7891617 | 6.964942   | 6.7559404 |
| 6.5597563 | 6.7891617 | 6.964942   | 6.7559404 |
| 3.2304492 | 3.5774732 | 2.3618152  | 2.67516   |
| 3.2304492 | 3.5774732 | 2.3618152  | 2.67516   |
| 3.2304492 | 3.5774732 | 2.3618152  | 2.67516   |
| 3.2304492 | 3.5774732 | 2.3618152  | 2.67516   |
| 2.350709  | 2.3408759 | 4.4519744  | 3.3630126 |
| 2.350709  | 2.3408759 | 4.4519744  | 3.3630126 |
| 10.418685 | 10.12784  | 10.65826   | 10.322233 |
| 2.787155  | 2.3408759 | 2.3618152  | 2.352752  |
| 6.5142684 | 5.76488   | 5.7986546  | 5.3757563 |
| 10.440105 | 10.562181 | 10.0166855 | 10.185456 |
| 4.6830173 | 2.9587145 | 3.7914703  | 3.4482164 |
| 4.6830173 | 2.9587145 | 3.7914703  | 3.4482164 |
| 4.6830173 | 2.9587145 | 3.7914703  | 3.4482164 |
| 4.6830173 | 2.9587145 | 3.7914703  | 3.4482164 |
| 3.0024228 | 5.235897  | 4.7277565  | 4.7771173 |
| 8.29063   | 8.268391  | 9.366451   | 8.756494  |
| 9.550444  | 10.419105 | 10.65195   | 10.399229 |
| 9.550444  | 10.419105 | 10.65195   | 10.399229 |
| 3.8070812 | 5.957973  | 4.2156496  | 5.136894  |
| 4.3596163 | 2.6987305 | 3.241848   | 3.6072707 |
| 6.4353776 | 3.3385913 | 6.37782    | 5.001696  |
| 6.4353776 | 3.3385913 | 6.37782    | 5.001696  |
| 3.4589298 | 6.3956637 | 5.6483765  | 6.0214953 |
| 4.886185  | 2.7306228 | 4.351959   | 3.0431654 |
| 3.4571464 | 4.011917  | 3.5394244  | 4.010012  |
| 7.9928718 | 7.002425  | 6.952891   | 6.8345838 |
| 2.350709  | 2.3408759 | 2.3618152  | 2.352752  |
| 3.1722012 | 2.3408759 | 2.3618152  | 2.352752  |
| 2.350709  | 3.714735  | 2.3618152  | 2.352752  |
| 6.0368934 | 7.650967  | 6.823078   | 6.97556   |

|               |             |             |            |    |           |
|---------------|-------------|-------------|------------|----|-----------|
| ASHGA5P046416 | 0.016292506 | 0.077996855 | 2.4871719  | up | noncoding |
| ASHGA5P043872 | 0.000229821 | 0.011769168 | 11.0577383 | up | noncoding |
| ASHGA5P043872 | 0.000229821 | 0.011769168 | 11.0577383 | up | noncoding |
| ASHGA5P046049 | 0.000349439 | 0.013409132 | 2.4119265  | up | noncoding |
| ASHGA5P025812 | 0.031123017 | 0.110685904 | 2.0602831  | up | noncoding |
| ASHGA5P025812 | 0.031123017 | 0.110685904 | 2.0602831  | up | noncoding |
| ASHGA5P026799 | 0.000656695 | 0.017168766 | 2.0351667  | up | noncoding |
| ASHGA5P026799 | 0.000656695 | 0.017168766 | 2.0351667  | up | noncoding |
| ASHGA5P032478 | 0.01262914  | 0.06880509  | 2.0892227  | up | noncoding |
| ASHGA5P032478 | 0.01262914  | 0.06880509  | 2.0892227  | up | noncoding |
| ASHGA5P032478 | 0.01262914  | 0.06880509  | 2.0892227  | up | noncoding |
| ASHGA5P020317 | 0.009898103 | 0.061737522 | 2.328077   | up | noncoding |
| ASHGA5P020317 | 0.009898103 | 0.061737522 | 2.328077   | up | noncoding |
| ASHGA5P020317 | 0.009898103 | 0.061737522 | 2.328077   | up | noncoding |
| ASHGA5P016541 | 0.01723248  | 0.079988469 | 2.4348507  | up | noncoding |
| ASHGA5P046098 | 3.86444E-07 | 0.001647562 | 4.077901   | up | noncoding |
| ASHGA5P038417 | 0.000271836 | 0.012302262 | 6.3859265  | up | noncoding |
| ASHGA5P038417 | 0.000271836 | 0.012302262 | 6.3859265  | up | noncoding |
| ASHGA5P031094 | 0.00605005  | 0.049583484 | 4.2383322  | up | noncoding |
| ASHGA5P031094 | 0.00605005  | 0.049583484 | 4.2383322  | up | noncoding |
| ASHGA5P057142 | 0.048554941 | 0.143101902 | 2.8529945  | up | noncoding |
| ASHGA5P016549 | 0.037266017 | 0.122466478 | 2.6263744  | up | noncoding |
| ASHGA5P026218 | 0.012098555 | 0.067400671 | 2.093307   | up | noncoding |
| ASHGA5P053762 | 0.018578054 | 0.08287643  | 2.1374719  | up | noncoding |
| ASHGA5P045934 | 0.003003908 | 0.035467016 | 2.0368639  | up | noncoding |
| ASHGA5P047627 | 0.038173864 | 0.124228413 | 2.1818442  | up | noncoding |
| ASHGA5P053394 | 0.001541695 | 0.026420993 | 2.0588543  | up | noncoding |
| ASHGA5P048793 | 0.002314099 | 0.031638821 | 2.0525688  | up | noncoding |
| ASHGA5P048793 | 0.002314099 | 0.031638821 | 2.0525688  | up | noncoding |
| ASHGA5P053589 | 0.008350373 | 0.05708397  | 2.1762685  | up | noncoding |
| ASHGA5P039589 | 0.002293898 | 0.031437116 | 2.4295175  | up | noncoding |
| ASHGA5P015357 | 0.049601541 | 0.144887709 | 3.777448   | up | noncoding |
| ASHGA5P039450 | 0.031019839 | 0.110553198 | 4.4514473  | up | noncoding |
| ASHGA5P039450 | 0.031019839 | 0.110553198 | 4.4514473  | up | noncoding |
| ASHGA5P041837 | 0.002365581 | 0.031814951 | 2.0304729  | up | noncoding |
| ASHGA5P053012 | 0.044695244 | 0.13592263  | 3.4380831  | up | noncoding |
| ASHGA5P038743 | 0.001848413 | 0.028874356 | 7.2016412  | up | noncoding |
| ASHGA5P031128 | 0.006343598 | 0.050739988 | 2.5975002  | up | noncoding |
| ASHGA5P049222 | 0.002543436 | 0.0327562   | 13.2848742 | up | noncoding |
| ASHGA5P054618 | 0.000712037 | 0.017913741 | 4.9716648  | up | noncoding |
| ASHGA5P030825 | 7.5138E-05  | 0.008283845 | 2.1553408  | up | noncoding |
| ASHGA5P045201 | 0.004337371 | 0.041731826 | 4.9603582  | up | noncoding |
| ASHGA5P045201 | 0.004337371 | 0.041731826 | 4.9603582  | up | noncoding |
| ASHGA5P045201 | 0.004337371 | 0.041731826 | 4.9603582  | up | noncoding |
| ASHGA5P046691 | 0.00046823  | 0.015177128 | 2.4840981  | up | noncoding |
| ASHGA5P046691 | 0.00046823  | 0.015177128 | 2.4840981  | up | noncoding |
| ASHGA5P046691 | 0.00046823  | 0.015177128 | 2.4840981  | up | noncoding |
| ASHGA5P046691 | 0.00046823  | 0.015177128 | 2.4840981  | up | noncoding |
| ASHGA5P046691 | 0.00046823  | 0.015177128 | 2.4840981  | up | noncoding |
| ASHGA5P028238 | 0.011513999 | 0.066123362 | 2.0183217  | up | noncoding |
| ASHGA5P031841 | 0.003999912 | 0.040535409 | 2.7906078  | up | noncoding |
| ASHGA5P038659 | 0.005562947 | 0.047409675 | 2.6890893  | up | noncoding |
| ASHGA5P027034 | 0.005533549 | 0.047322231 | 2.1036244  | up | noncoding |
| ASHGA5P020758 | 0.004557848 | 0.042992804 | 2.0260814  | up | noncoding |
| ASHGA5P036251 | 0.027287187 | 0.103048424 | 2.3689239  | up | noncoding |
| ASHGA5P038013 | 0.00111681  | 0.022608782 | 2.2012925  | up | noncoding |
| ASHGA5P053792 | 0.002076314 | 0.030074411 | 3.6802567  | up | noncoding |
| ASHGA5P016384 | 0.003163908 | 0.036430985 | 2.2708292  | up | noncoding |
| ASHGA5P050387 | 0.017777672 | 0.080955991 | 2.3332116  | up | noncoding |
| ASHGA5P036997 | 0.003604926 | 0.038636328 | 7.0800417  | up | noncoding |
| ASHGA5P049060 | 0.004546736 | 0.042958215 | 2.0816791  | up | noncoding |
| ASHGA5P049060 | 0.004546736 | 0.042958215 | 2.0816791  | up | noncoding |

|                 |                  |                     |      |       |   |
|-----------------|------------------|---------------------|------|-------|---|
| ENST00000391707 | PPP2R3B-AS1      | GENCODE             | 428  | chrX  | + |
| NR_036484       | FEZF1-AS1        | RefSeq              | 2653 | chr7  | + |
| NR_036484       | FEZF1-AS1        | RefSeq              | 2653 | chr7  | + |
| TCONS_00001617  | XLOC_000947      | LincRNAs identified | 533  | chr1  | - |
| NR_038210       | SAMD12-AS1       | RefSeq              | 701  | chr8  | + |
| NR_038210       | SAMD12-AS1       | RefSeq              | 701  | chr8  | + |
| ENST00000539685 | AP000462.1       | GENCODE             | 384  | chr11 | + |
| ENST00000539685 | AP000462.1       | GENCODE             | 384  | chr11 | + |
| ENST00000572349 | RP11-63A1.1      | GENCODE             | 395  | chr17 | - |
| ENST00000572349 | RP11-63A1.1      | GENCODE             | 395  | chr17 | - |
| ENST00000572349 | RP11-63A1.1      | GENCODE             | 395  | chr17 | - |
| ENST00000511484 | CTC-458I2.2      | GENCODE             | 664  | chr5  | + |
| ENST00000511484 | CTC-458I2.2      | GENCODE             | 664  | chr5  | + |
| ENST00000511484 | CTC-458I2.2      | GENCODE             | 664  | chr5  | + |
| ENST00000431464 | RP11-308D16.4    | GENCODE             | 646  | chrX  | + |
| ENST00000457936 | RP11-706O15.5    | GENCODE             | 468  | chrX  | - |
| ENST00000428732 | RP4-694A7.4      | GENCODE             | 1247 | chr1  | + |
| ENST00000428732 | RP4-694A7.4      | GENCODE             | 1247 | chr1  | + |
| TCONS_00017504  | XLOC_008152      | LincRNAs identified | 2622 | chrX  | - |
| TCONS_00017504  | XLOC_008152      | LincRNAs identified | 2622 | chrX  | - |
| TCONS_00013698  | XLOC_006356      | LincRNAs identified | 484  | chr7  | - |
| ENST00000431558 | PRRT3-AS1        | GENCODE             | 614  | chr3  | + |
| AI283175        |                  | UCR                 | 417  | chr2  | + |
| uc004axb.2      | BC070371         | UCSC_knowngene      | 1370 | chr9  | - |
| ENST00000450803 | RP11-27I1.2      | GENCODE             | 912  | chr9  | + |
| ENST00000416191 | RP11-441O15.3    | GENCODE             | 666  | chr10 | + |
| ENST00000422183 | <b>GAS5</b>      | GENCODE             | 745  | chr1  | - |
| ENST00000562009 | CTD-2311M21.2    | GENCODE             | 3337 | chr15 | + |
| ENST00000562009 | CTD-2311M21.2    | GENCODE             | 3337 | chr15 | + |
| ENST00000519852 | RP13-582O9.5     | GENCODE             | 328  | chr8  | - |
| ENST00000514265 | RP11-184M15.1    | GENCODE             | 1623 | chr4  | - |
| ENST00000419604 | RP11-64P14.7     | GENCODE             | 497  | chr9  | + |
| uc003hhv.1      | BC016361         | UCSC_knowngene      | 823  | chr4  | - |
| uc003hhv.1      | BC016361         | UCSC_knowngene      | 823  | chr4  | - |
| uc003orh.1      | DQ592954         | UCSC_knowngene      | 2513 | chr6  | - |
| NR_002795       | HOXA11-AS        | RefSeq              | 1628 | chr7  | + |
| ENST00000455974 | AC123023.1       | GENCODE             | 555  | chr3  | + |
| ENST00000568752 | RP11-989E6.10    | GENCODE             | 3971 | chr16 | - |
| ENST00000560029 | <b>CRNDE</b>     | GENCODE             | 659  | chr16 | - |
| ENST00000522718 | RP11-150O12.1    | GENCODE             | 1093 | chr8  | - |
| uc010utu.2      | WASH3P           | UCSC_knowngene      | 1923 | chr15 | + |
| uc021pku.1      | AX747026         | UCSC_knowngene      | 2133 | chr1  | + |
| uc021pku.1      | AX747026         | UCSC_knowngene      | 2133 | chr1  | + |
| uc021pku.1      | AX747026         | UCSC_knowngene      | 2133 | chr1  | + |
| ENST00000441414 | FMR1-IT1         | GENCODE             | 343  | chrX  | + |
| ENST00000441414 | FMR1-IT1         | GENCODE             | 343  | chrX  | + |
| ENST00000441414 | FMR1-IT1         | GENCODE             | 343  | chrX  | + |
| ENST00000441414 | FMR1-IT1         | GENCODE             | 343  | chrX  | + |
| ENST00000441414 | FMR1-IT1         | GENCODE             | 343  | chrX  | + |
| ENST00000552707 | RP11-554E23.4    | GENCODE             | 374  | chr12 | + |
| NR_046242       | LOC100505865     | RefSeq              | 913  | chr16 | + |
| ENST00000424493 | AC024560.2       | GENCODE             | 1471 | chr3  | - |
| TCONS_00017518  | XLOC_008186      | LincRNAs identified | 1269 | chrX  | - |
| NR_024281       | LINC00599        | RefSeq              | 2942 | chr8  | - |
| ENST00000436820 | AC018470.4       | GENCODE             | 1635 | chr2  | + |
| NR_024355       | LINC00634        | RefSeq              | 1506 | chr22 | + |
| ENST00000563434 | RP11-4O1.2       | GENCODE             | 4488 | chr9  | - |
| ENST00000429932 | LL0XNC01-237H1.2 | GENCODE             | 439  | chrX  | + |
| ENST00000547349 | RP11-320M2.1     | GENCODE             | 732  | chr2  | + |
| ENST00000416638 | RP3-410C9.2      | GENCODE             | 626  | chr20 | + |
| ENST00000572913 | RP11-485G7.5     | GENCODE             | 714  | chr16 | - |
| ENST00000572913 | RP11-485G7.5     | GENCODE             | 714  | chr16 | - |

|           |           |                   |                             |                       |
|-----------|-----------|-------------------|-----------------------------|-----------------------|
| 281724    | 282586    | NR_027231         | TCTACGTTACTTTATGTGGGAGTAG   | intergenic            |
| 121943711 | 121950131 |                   | CACGGTTCGACT(154860         | natural antisense     |
| 121943711 | 121950131 |                   | CACGGTTCGACT(154860         | natural antisense     |
| 106015902 | 106029242 |                   | AATGCCATGGGTGCAGCATTAGAA    | intergenic            |
| 119633239 | 119738306 |                   | GCAAAGTAATAC'552860         | intronic antisense    |
| 119633239 | 119738306 |                   | GCAAAGTAATAC'552860         | intronic antisense    |
| 115267537 | 115268295 | ENST00000540545,  | ATGTATCAAGATGTAGAATAGTACA   | intronic antisense    |
| 115267537 | 115268295 | ENST00000540545,  | ATGTATCAAGATGTAGAATAGTACA   | intronic antisense    |
| 44994135  | 45000400  |                   | AGAGCAAAGTTGAAGGCGAGCCGC    | bidirectional         |
| 44994135  | 45000400  |                   | AGAGCAAAGTTGAAGGCGAGCCGC    | bidirectional         |
| 44994135  | 45000400  |                   | AGAGCAAAGTTGAAGGCGAGCCGC    | bidirectional         |
| 79424183  | 79439706  |                   | AACATCCCAGATTGGCTTTCTTTCTA  | intronic antisense    |
| 79424183  | 79439706  |                   | AACATCCCAGATTGGCTTTCTTTCTA  | intronic antisense    |
| 79424183  | 79439706  |                   | AACATCCCAGATTGGCTTTCTTTCTA  | natural antisense     |
| 135991633 | 136103777 |                   | GTTTGTAGAGAGACAGTTGGATTTT   | intergenic            |
| 3811138   | 3823602   | ENST00000424415,  | TCAACCAACAACACTGTCGAAGAGGAC | intergenic            |
| 68962358  | 69004310  |                   | ACTGTGGGGATAAAATTTAAACATT   | intronic antisense    |
| 68962358  | 69004310  |                   | ACTGTGGGGATAAAATTTAAACATT   | intronic antisense    |
| 46458742  | 46461839  | NM_001257291, NM  | AAGTACAGCTGAAAAGATCACGAA    | exon sense-overlappi  |
| 46458742  | 46461839  | NM_001257291, NM  | AAGTACAGCTGAAAAGATCACGAA    | exon sense-overlappi  |
| 12713476  | 12714328  |                   | TTTTGGTGTAAAGCAGGTAAAAGCT   | intergenic            |
| 9989087   | 9996471   |                   | GTAAGGGTCGTG'100874032      | natural antisense     |
| 171571428 | 171571847 |                   | TTCTTTGATGATTGGGTAGCGCAA    | intergenic            |
| 99957619  | 99958989  | NM_001242797, NM  | GATCATGATAATATTAGGGCCAGTG   | intergenic            |
| 123608959 | 123614245 |                   | ATCTCTGAGAGTTAACAGCAGAAGG   | intergenic            |
| 101190947 | 101195542 |                   | TATCTAGAGCCCTCCAAGAAGCTT    | bidirectional         |
| 173833039 | 173836181 | ENST00000434796,  | GTTGGGACTATT'60674          | intergenic            |
| 74646796  | 74656961  | ENST00000564109   | TACTATCAGCCATGGTCAACCCAC    | intronic antisense    |
| 74646796  | 74656961  | ENST00000564109   | TACTATCAGCCATGGTCAACCCAC    | intronic antisense    |
| 144362997 | 144363420 | ENST00000518073   | TGGCAAAGTAAGCGCGTGGGACAG    | intergenic            |
| 129489126 | 129491686 |                   | GTTTCCTCAGTGCTTTGAAGATTTT   | intergenic            |
| 125381636 | 125401964 | ENST00000431442   | AAACGGAAAGATTCCCTCAACCATAA  | intronic antisense    |
| 75144013  | 75196255  |                   | CGGATTCTAAGTATCAAGAAGAATC   | intronic antisense    |
| 75144013  | 75196255  |                   | CGGATTCTAAGTATCAAGAAGAATC   | intronic antisense    |
| 41757633  | 41760146  |                   | CCTCCATTAATAATCCATGTTTTGGG  | natural antisense     |
| 27225026  | 27228912  | uc022aat.1        | CTGGGGACTACC.221883         | bidirectional         |
| 34244735  | 34310303  |                   | TCCCAATTACAGGGAAGCCTGCTGA   | intergenic            |
| 33344308  | 33348279  |                   | GTGCTTGTTATTAGTTGTATTACATC  | intergenic            |
| 54952781  | 54954528  |                   | AAATCAATAGGT.643911         | intergenic            |
| 37278858  | 37351431  |                   | TTGAAGAATAAGAAGCCACAGCTTG   | intergenic            |
| 102501015 | 102514305 | NR_003659, uc010b | ACCCGGAGGCGC'374666         | intergenic            |
| 235712454 | 235714587 |                   | AACAGGTCCTTATATTACTGCAGCC   | natural antisense     |
| 235712454 | 235714587 |                   | AACAGGTCCTTATATTACTGCAGCC   | natural antisense     |
| 235712454 | 235714587 |                   | AACAGGTCCTTATATTACTGCAGCC   | natural antisense     |
| 147028460 | 147029103 |                   | CTGATATGTTTGATGAACTTGGCAG   | intron sense-overlapp |
| 147028460 | 147029103 |                   | CTGATATGTTTGATGAACTTGGCAG   | intron sense-overlapp |
| 147028460 | 147029103 |                   | CTGATATGTTTGATGAACTTGGCAG   | intron sense-overlapp |
| 147028460 | 147029103 |                   | CTGATATGTTTGATGAACTTGGCAG   | intron sense-overlapp |
| 147028460 | 147029103 |                   | CTGATATGTTTGATGAACTTGGCAG   | intron sense-overlapp |
| 102457132 | 102468598 |                   | CAGTCCAGACTCCATTTTGCAGTC    | natural antisense     |
| 66442426  | 66444803  |                   | GCTGGAGGAGTA'100505865      | intergenic            |
| 197387435 | 197392628 |                   | TCACCGTGAAATATCTTCTGAGACA   | intergenic            |
| 73167079  | 73225243  |                   | ATCAAGTGTTTTGCCTTCTCCAAG    | intergenic            |
| 9757573   | 9760839   |                   | AGCTTATATGAT'157627         | intergenic            |
| 175193499 | 175195270 |                   | TGTTTAAGGTACATTGATCAATCTA   | intergenic            |
| 42348190  | 42354946  |                   | CCCCCTTCGCTGC'339674        | intergenic            |
| 114794834 | 114800010 |                   | ATTCCTGTCATATGTTTTGTAAACA   | intergenic            |
| 102152508 | 102160619 |                   | TTGAACATCGTGTGACATGATGAAT   | intergenic            |
| 10589853  | 10590920  |                   | CCAAAACCAGGCTGAGGCACAGTC    | intergenic            |
| 26171624  | 26174582  |                   | CAGGGTAAAATGAATCAAGTTCAGA   | intergenic            |
| 11435665  | 11439068  |                   | AAAGAACTTCCTCTTTCAACGCATC   | intronic antisense    |
| 11435665  | 11439068  |                   | AAAGAACTTCCTCTTTCAACGCATC   | intronic antisense    |



|                 |         |                         |           |           |
|-----------------|---------|-------------------------|-----------|-----------|
| NM_001024613    | FEZF1   | fez family zinc finger- | 121941447 | 121944565 |
| NM_001160264    | FEZF1   | fez family zinc finger- | 121941447 | 121944565 |
| NM_001101676    | SAMD12  | sterile alpha motif do- | 119201694 | 119634184 |
| NM_207506       | SAMD12  | sterile alpha motif do- | 119390226 | 119634184 |
| NM_001098517    | CADM1   | cell adhesion molecu-   | 115044344 | 115375241 |
| NM_014333       | CADM1   | cell adhesion molecu-   | 115044344 | 115375241 |
| NM_001012511    | GOSR2   | Golgi SNAP receptor+    | 45000485  | 45014205  |
| NM_004287       | GOSR2   | Golgi SNAP receptor+    | 45000485  | 45018733  |
| NM_054022       | GOSR2   | Golgi SNAP receptor+    | 45000485  | 45018733  |
| NM_001174071    | SERINC5 | serine incorporator 5-  | 79407049  | 79551898  |
| NM_178276       | SERINC5 | serine incorporator 5-  | 79407049  | 79551898  |
| NM_001174072    | SERINC5 | serine incorporator 5-  | 79434549  | 79551898  |
| NM_001114120    | DEPDC1  | DEP domain-contain-     | 68939834  | 68962799  |
| NM_017779       | DEPDC1  | DEP domain-contain-     | 68939834  | 68962799  |
| NM_001257291    | SLC9A7  | sodium/hydrogen exc-    | 46458685  | 46618607  |
| NM_032591       | SLC9A7  | sodium/hydrogen exc-    | 46458685  | 46618607  |
| NM_207351       | PRRT3   | proline-rich transmer-  | 9987225   | 9994078   |
| NM_002079       | GOT1    | aspartate aminotransl-  | 101156626 | 101190530 |
| NM_000781       | CYP11A1 | cholesterol side-chain- | 74630102  | 74660081  |
| NM_001099773    | CYP11A1 | cholesterol side-chain- | 74630102  | 74658553  |
| NM_001004450    | OR1B1   | olfactory receptor 1B-  | 125390857 | 125391814 |
| NM_001013442    | EPGN    | epigen precursor +      | 75174203  | 75179307  |
| NM_001144978    | MTHFD2L | probable bifunctional+  | 75023828  | 75168814  |
| NM_001134493    | TOMM6   | mitochondrial import+   | 41755180  | 41757634  |
| NM_005523       | HOXA11  | homeobox protein H-     | 27220775  | 27224835  |
| NM_001098721    | GNG4    | guanine nucleotide-b-   | 235710984 | 235814054 |
| NM_001098722    | GNG4    | guanine nucleotide-b-   | 235710984 | 235813293 |
| NM_004485       | GNG4    | guanine nucleotide-b-   | 235710984 | 235814054 |
| NM_001185075    | FMR1    | fragile X mental retai+ | 146993468 | 147032647 |
| NM_001185076    | FMR1    | fragile X mental retai+ | 146993468 | 147032647 |
| NM_001185081    | FMR1    | fragile X mental retai+ | 146993468 | 147032647 |
| NM_001185082    | FMR1    | fragile X mental retai+ | 146993468 | 147032647 |
| NM_002024       | FMR1    | fragile X mental retai+ | 146993468 | 147032647 |
| NM_024057       | NUP37   | nucleoporin Nup37 -     | 102467972 | 102512361 |
| ENST00000381820 | RMI2    | RMI2, RecQ mediate+     | 11410635  | 11445585  |
| ENST00000572173 | RMI2    | RMI2, RecQ mediate+     | 11343505  | 11445612  |

|             |             |           |           |            |           |
|-------------|-------------|-----------|-----------|------------|-----------|
| 671.20362   | 129.280747  | 8.574494  | 7.259988  | 253.73955  | 243.23259 |
| 412.805026  | 25.867451   | 8.02908   | 4.562095  | 533.0699   | 947.89233 |
| 412.805026  | 25.867451   | 8.02908   | 4.562095  | 533.0699   | 947.89233 |
| 20.566902   | 5.609559    | 4.040058  | 2.769872  | 26.114342  | 15.859098 |
| 31.739433   | 12.351739   | 4.644624  | 3.601781  | 33.794193  | 27.391552 |
| 31.739433   | 12.351739   | 4.644624  | 3.601781  | 33.794193  | 27.391552 |
| 449.823663  | 138.671366  | 8.418452  | 7.393306  | 428.46072  | 418.45123 |
| 449.823663  | 138.671366  | 8.418452  | 7.393306  | 428.46072  | 418.45123 |
| 132.659919  | 37.885936   | 6.523572  | 5.460606  | 118.05167  | 43.920975 |
| 132.659919  | 37.885936   | 6.523572  | 5.460606  | 118.05167  | 43.920975 |
| 132.659919  | 37.885936   | 6.523572  | 5.460606  | 118.05167  | 43.920975 |
| 22.743672   | 6.434565    | 4.109725  | 2.890587  | 29.63126   | 36.770275 |
| 22.743672   | 6.434565    | 4.109725  | 2.890587  | 29.63126   | 36.770275 |
| 22.743672   | 6.434565    | 4.109725  | 2.890587  | 29.63126   | 36.770275 |
| 359.59739   | 75.331805   | 7.793698  | 6.509865  | 200.33554  | 159.46729 |
| 8944.815833 | 1231.241583 | 12.639341 | 10.611514 | 8595.918   | 9368.947  |
| 71.911374   | 6.037911    | 5.497023  | 2.822127  | 100.22652  | 173.47102 |
| 71.911374   | 6.037911    | 5.497023  | 2.822127  | 100.22652  | 173.47102 |
| 221.195779  | 31.768577   | 7.299253  | 5.215756  | 255.54494  | 163.8613  |
| 221.195779  | 31.768577   | 7.299253  | 5.215756  | 255.54494  | 163.8613  |
| 43.315978   | 8.989279    | 4.776907  | 3.264431  | 67.38665   | 95.45235  |
| 703.641905  | 164.357054  | 8.903529  | 7.510456  | 1022.31116 | 1127.4922 |
| 67.49698    | 20.258525   | 5.583039  | 4.517255  | 66.16638   | 37.27291  |
| 1030.742667 | 308.925797  | 9.570382  | 8.474476  | 1006.8697  | 697.5163  |
| 43.138424   | 14.813597   | 5.08925   | 4.0629    | 41.291748  | 33.647884 |
| 130.59945   | 42.824518   | 6.559588  | 5.43404   | 115.34968  | 62.319252 |
| 6606.02085  | 1741.364283 | 12.190637 | 11.148795 | 5135.8267  | 5439.718  |
| 2778.055667 | 764.232133  | 10.993856 | 9.956426  | 3092.0317  | 2993.7837 |
| 2778.055667 | 764.232133  | 10.993856 | 9.956426  | 3092.0317  | 2993.7837 |
| 3024.579917 | 772.504498  | 11.10722  | 9.985364  | 3539.2769  | 2626.9949 |
| 27.242682   | 8.593664    | 4.425282  | 3.144612  | 25.384558  | 18.145573 |
| 65.080668   | 8.370677    | 4.99228   | 3.074868  | 99.01095   | 4.9999995 |
| 546.065132  | 79.242659   | 8.168043  | 6.013768  | 725.00555  | 1385.9906 |
| 546.065132  | 79.242659   | 8.168043  | 6.013768  | 725.00555  | 1385.9906 |
| 1471.789923 | 428.32903   | 10.05482  | 9.033004  | 1288.5668  | 889.52844 |
| 7206.22425  | 1823.257095 | 12.157038 | 10.375434 | 5838.377   | 9070.881  |
| 356.271108  | 32.481188   | 7.814915  | 4.966589  | 442.84528  | 798.38965 |
| 366.931295  | 80.674987   | 8.047866  | 6.670743  | 334.519    | 149.86488 |
| 329.594535  | 14.497235   | 7.580697  | 3.848984  | 232.41103  | 34.40794  |
| 96.344149   | 13.104474   | 6.210244  | 3.896515  | 75.91766   | 73.24381  |
| 588.097642  | 167.631005  | 8.809325  | 7.70141   | 611.9099   | 578.4583  |
| 188.858192  | 28.840442   | 7.06676   | 4.756316  | 199.85606  | 211.78928 |
| 188.858192  | 28.840442   | 7.06676   | 4.756316  | 199.85606  | 211.78928 |
| 188.858192  | 28.840442   | 7.06676   | 4.756316  | 199.85606  | 211.78928 |
| 471.40069   | 123.228682  | 8.381908  | 7.069186  | 503.31506  | 182.40248 |
| 471.40069   | 123.228682  | 8.381908  | 7.069186  | 503.31506  | 182.40248 |
| 471.40069   | 123.228682  | 8.381908  | 7.069186  | 503.31506  | 182.40248 |
| 471.40069   | 123.228682  | 8.381908  | 7.069186  | 503.31506  | 182.40248 |
| 471.40069   | 123.228682  | 8.381908  | 7.069186  | 503.31506  | 182.40248 |
| 72.640222   | 22.29534    | 5.688251  | 4.675095  | 103.00626  | 67.224365 |
| 1066.92896  | 183.331068  | 9.304492  | 7.823913  | 964.86523  | 1588.3994 |
| 7296.37665  | 1693.200853 | 12.071685 | 10.644568 | 5915.099   | 3184.3025 |
| 475.522757  | 144.311274  | 8.460324  | 7.387447  | 599.65234  | 616.627   |
| 148.457023  | 53.57498    | 6.845718  | 5.827025  | 194.96333  | 138.16191 |
| 35.845211   | 10.985012   | 4.781252  | 3.53702   | 40.565536  | 45.376064 |
| 191.540465  | 57.279936   | 7.20382   | 6.065469  | 234.36052  | 215.14835 |
| 868.838228  | 182.299244  | 9.306713  | 7.426906  | 674.1523   | 478.80157 |
| 127.336625  | 32.907507   | 6.534521  | 5.351302  | 186.28818  | 174.99513 |
| 41.164003   | 10.116118   | 4.814613  | 3.592296  | 51.618027  | 92.024666 |
| 141.066022  | 10.697367   | 6.454201  | 3.630443  | 160.89691  | 184.76048 |
| 31.255109   | 9.43861     | 4.541928  | 3.484181  | 39.137627  | 47.573627 |
| 31.255109   | 9.43861     | 4.541928  | 3.484181  | 39.137627  | 47.573627 |

|            |           |            |           |           |           |
|------------|-----------|------------|-----------|-----------|-----------|
| 286.2082   | 407.20108 | 1479.0515  | 1357.7888 | 103.42919 | 52.098633 |
| 126.292206 | 299.64053 | 243.69633  | 326.23886 | 24.608393 | 52.58406  |
| 126.292206 | 299.64053 | 243.69633  | 326.23886 | 24.608393 | 52.58406  |
| 18.397598  | 26.094755 | 15.58177   | 21.35385  | 5.8255844 | 5.692079  |
| 39.784683  | 38.320972 | 18.836853  | 32.308346 | 17.086332 | 4.9999995 |
| 39.784683  | 38.320972 | 18.836853  | 32.308346 | 17.086332 | 4.9999995 |
| 426.77908  | 607.75775 | 463.51096  | 353.98224 | 110.7414  | 72.974335 |
| 426.77908  | 607.75775 | 463.51096  | 353.98224 | 110.7414  | 72.974335 |
| 158.24849  | 74.75836  | 201.48866  | 199.49136 | 25.856478 | 16.941402 |
| 158.24849  | 74.75836  | 201.48866  | 199.49136 | 25.856478 | 16.941402 |
| 158.24849  | 74.75836  | 201.48866  | 199.49136 | 25.856478 | 16.941402 |
| 14.986009  | 18.544651 | 19.214079  | 17.315758 | 4.9999995 | 5.2764606 |
| 14.986009  | 18.544651 | 19.214079  | 17.315758 | 4.9999995 | 5.2764606 |
| 14.986009  | 18.544651 | 19.214079  | 17.315758 | 4.9999995 | 5.2764606 |
| 216.52159  | 852.79456 | 154.82321  | 573.64215 | 50.20129  | 46.275692 |
| 7691.036   | 5072.604  | 11278.917  | 11661.473 | 1174.6461 | 861.8712  |
| 33.030704  | 26.936182 | 47.24785   | 50.55597  | 9.187589  | 5.365917  |
| 33.030704  | 26.936182 | 47.24785   | 50.55597  | 9.187589  | 5.365917  |
| 351.79648  | 84.525894 | 240.68584  | 230.76022 | 24.30252  | 14.01255  |
| 351.79648  | 84.525894 | 240.68584  | 230.76022 | 24.30252  | 14.01255  |
| 21.332623  | 14.926057 | 31.17306   | 29.62513  | 9.849689  | 4.9999995 |
| 893.99677  | 408.02588 | 317.27634  | 452.74908 | 199.98055 | 330.89413 |
| 60.293495  | 150.66992 | 34.72685   | 55.852325 | 16.68924  | 7.655116  |
| 1280.2148  | 1348.1548 | 689.9794   | 1161.721  | 348.5954  | 179.88452 |
| 46.12807   | 54.37024  | 32.43362   | 50.958984 | 13.08245  | 6.3591924 |
| 162.23169  | 226.8341  | 73.4513    | 143.41068 | 47.419125 | 12.146311 |
| 5093.9814  | 10018.558 | 4845.096   | 9102.945  | 1431.231  | 1452.2375 |
| 3243.6501  | 2915.7593 | 1784.7921  | 2638.3171 | 689.35205 | 566.5641  |
| 3243.6501  | 2915.7593 | 1784.7921  | 2638.3171 | 689.35205 | 566.5641  |
| 4451.2363  | 2510.1887 | 2168.2385  | 2851.5442 | 836.3771  | 890.17786 |
| 29.249052  | 42.98654  | 23.83895   | 23.851418 | 4.9999995 | 4.9999995 |
| 183.28923  | 30.182858 | 37.487514  | 35.513454 | 4.9999995 | 4.9999995 |
| 71.11921   | 192.34004 | 441.11566  | 460.81973 | 43.750675 | 70.05242  |
| 71.11921   | 192.34004 | 441.11566  | 460.81973 | 43.750675 | 70.05242  |
| 1542.3085  | 2227.5315 | 966.5786   | 1916.2257 | 490.2582  | 216.8051  |
| 1890.446   | 12629.073 | 4595.2935  | 9213.275  | 513.98956 | 787.1209  |
| 98.33504   | 193.13806 | 304.0135   | 300.90512 | 42.405724 | 70.89327  |
| 482.01184  | 479.72824 | 281.71155  | 473.75226 | 71.08186  | 72.7857   |
| 282.47983  | 325.15378 | 376.53638  | 726.57825 | 9.795468  | 7.806606  |
| 82.83483   | 97.42343  | 107.507774 | 141.13739 | 11.71605  | 12.41221  |
| 665.8767   | 634.0742  | 488.26755  | 549.9992  | 207.24457 | 125.57869 |
| 167.84314  | 62.420963 | 267.5137   | 223.72601 | 44.17083  | 13.305239 |
| 167.84314  | 62.420963 | 267.5137   | 223.72601 | 44.17083  | 13.305239 |
| 167.84314  | 62.420963 | 267.5137   | 223.72601 | 44.17083  | 13.305239 |
| 798.1058   | 454.80774 | 367.82016  | 521.9529  | 152.2401  | 48.15187  |
| 798.1058   | 454.80774 | 367.82016  | 521.9529  | 152.2401  | 48.15187  |
| 798.1058   | 454.80774 | 367.82016  | 521.9529  | 152.2401  | 48.15187  |
| 798.1058   | 454.80774 | 367.82016  | 521.9529  | 152.2401  | 48.15187  |
| 798.1058   | 454.80774 | 367.82016  | 521.9529  | 152.2401  | 48.15187  |
| 135.53238  | 48.452423 | 34.908245  | 46.71766  | 24.792227 | 10.256871 |
| 294.4443   | 1947.0696 | 279.03253  | 1327.7627 | 145.47002 | 150.4515  |
| 7922.1294  | 15645.356 | 1640.123   | 9471.25   | 2123.5808 | 401.21442 |
| 351.32935  | 284.3022  | 522.1803   | 479.04535 | 151.02914 | 79.07642  |
| 171.94913  | 126.90697 | 124.37538  | 134.38542 | 63.330936 | 18.990917 |
| 41.18108   | 44.83142  | 19.57098   | 23.546188 | 8.160525  | 4.9999995 |
| 210.1307   | 173.26314 | 125.26318  | 191.0769  | 57.9891   | 28.582373 |
| 788.0398   | 909.6095  | 1014.8951  | 1347.5311 | 109.37683 | 38.627575 |
| 160.71205  | 84.26235  | 73.81636   | 83.94568  | 38.77283  | 35.349983 |
| 29.021847  | 30.817965 | 18.02045   | 25.48106  | 11.914889 | 6.75845   |
| 106.64323  | 20.279812 | 202.63623  | 171.17947 | 10.11433  | 13.367831 |
| 13.775978  | 28.636839 | 29.307579  | 29.099005 | 13.93261  | 6.305507  |
| 13.775978  | 28.636839 | 29.307579  | 29.099005 | 13.93261  | 6.305507  |

|           |           |           |            |           |           |
|-----------|-----------|-----------|------------|-----------|-----------|
| 186.7882  | 125.94431 | 170.97055 | 136.4536   | 7.5304184 | 7.66034   |
| 4.9999995 | 44.793858 | 6.998294  | 21.2201    | 8.572103  | 9.550927  |
| 4.9999995 | 44.793858 | 6.998294  | 21.2201    | 8.572103  | 9.550927  |
| 4.9999995 | 5.2556195 | 5.846801  | 6.037268   | 4.249222  | 4.006304  |
| 23.316027 | 9.069829  | 12.647221 | 6.991023   | 4.6161747 | 4.721788  |
| 23.316027 | 9.069829  | 12.647221 | 6.991023   | 4.6161747 | 4.721788  |
| 141.95694 | 188.64235 | 200.76328 | 116.94989  | 8.283264  | 8.401617  |
| 141.95694 | 188.64235 | 200.76328 | 116.94989  | 8.283264  | 8.401617  |
| 40.592106 | 48.840233 | 59.821777 | 35.26362   | 6.4327116 | 5.3407936 |
| 40.592106 | 48.840233 | 59.821777 | 35.26362   | 6.4327116 | 5.3407936 |
| 40.592106 | 48.840233 | 59.821777 | 35.26362   | 6.4327116 | 5.3407936 |
| 10.624071 | 5.6570206 | 6.6374264 | 5.4124136  | 4.433352  | 5.106573  |
| 10.624071 | 5.6570206 | 6.6374264 | 5.4124136  | 4.433352  | 5.106573  |
| 10.624071 | 5.6570206 | 6.6374264 | 5.4124136  | 4.433352  | 5.106573  |
| 65.69278  | 90.40048  | 115.18681 | 84.23378   | 7.1943493 | 7.0752144 |
| 1531.2681 | 848.3157  | 1884.7251 | 1086.6233  | 12.57487  | 12.738068 |
| 4.9999995 | 4.9999995 | 6.0128636 | 5.6610947  | 6.1965528 | 7.2003274 |
| 4.9999995 | 4.9999995 | 6.0128636 | 5.6610947  | 6.1965528 | 7.2003274 |
| 29.558603 | 51.98918  | 30.938353 | 39.810257  | 7.540243  | 7.11353   |
| 29.558603 | 51.98918  | 30.938353 | 39.810257  | 7.540243  | 7.11353   |
| 14.987499 | 8.451028  | 7.006478  | 8.640983   | 5.6135015 | 6.361598  |
| 52.374027 | 165.94241 | 121.35799 | 115.593216 | 9.5236    | 9.78898   |
| 32.16271  | 23.79824  | 19.258718 | 21.987127  | 5.5886607 | 5.125633  |
| 564.3572  | 141.6647  | 399.7734  | 219.27956  | 9.506457  | 9.122319  |
| 22.840633 | 15.566407 | 19.484777 | 11.54812   | 4.9049745 | 4.9935856 |
| 96.18481  | 22.041058 | 47.330997 | 31.824804  | 6.3975606 | 5.796814  |
| 1390.6674 | 2144.3096 | 2230.1643 | 1799.5759  | 11.833317 | 11.955706 |
| 802.4681  | 930.3179  | 836.9694  | 759.72125  | 11.116395 | 11.127507 |
| 802.4681  | 930.3179  | 836.9694  | 759.72125  | 11.116395 | 11.127507 |
| 761.2903  | 719.28723 | 787.252   | 640.6425   | 11.311047 | 10.937656 |
| 8.333652  | 11.620361 | 14.221619 | 7.386353   | 4.2073703 | 4.177958  |
| 6.525768  | 17.860292 | 9.065646  | 6.772355   | 6.1789713 | 2.3499577 |
| 8.501146  | 226.56932 | 23.343193 | 103.2392   | 9.033738  | 10.067459 |
| 8.501146  | 226.56932 | 23.343193 | 103.2392   | 9.033738  | 10.067459 |
| 717.0488  | 386.5696  | 420.45953 | 338.83295  | 9.865118  | 9.4597025 |
| 115.46491 | 1405.8851 | 5373.6353 | 2743.4468  | 12.017592 | 12.688867 |
| 14.711951 | 39.46258  | 6.0835543 | 21.33005   | 8.319926  | 9.309109  |
| 84.81719  | 104.5819  | 77.8727   | 72.91057   | 7.9318666 | 6.9931664 |
| 19.312536 | 32.781372 | 4.9999995 | 12.28743   | 7.4073486 | 5.023758  |
| 4.9999995 | 20.662361 | 14.367782 | 14.468439  | 5.793828  | 6.0104623 |
| 241.05762 | 138.1941  | 159.23903 | 134.47202  | 8.786216  | 8.86651   |
| 72.88825  | 15.317427 | 16.209726 | 11.151178  | 7.190648  | 7.4719305 |
| 72.88825  | 15.317427 | 16.209726 | 11.151178  | 7.190648  | 7.4719305 |
| 72.88825  | 15.317427 | 16.209726 | 11.151178  | 7.190648  | 7.4719305 |
| 267.3392  | 75.55464  | 107.07337 | 89.01291   | 8.492818  | 7.2694163 |
| 267.3392  | 75.55464  | 107.07337 | 89.01291   | 8.492818  | 7.2694163 |
| 267.3392  | 75.55464  | 107.07337 | 89.01291   | 8.492818  | 7.2694163 |
| 267.3392  | 75.55464  | 107.07337 | 89.01291   | 8.492818  | 7.2694163 |
| 267.3392  | 75.55464  | 107.07337 | 89.01291   | 8.492818  | 7.2694163 |
| 35.842136 | 27.482635 | 16.534939 | 18.863232  | 6.239457  | 5.8973746 |
| 136.79701 | 316.6172  | 155.5712  | 195.07948  | 9.441455  | 10.244089 |
| 4488.196  | 1711.3002 | 457.1824  | 977.7313   | 12.033515 | 11.220499 |
| 274.12427 | 91.559204 | 161.61008 | 108.46853  | 8.753903  | 8.950588  |
| 121.18968 | 43.63532  | 38.717896 | 35.58513   | 7.158551  | 6.879056  |
| 12.041229 | 18.41108  | 10.624661 | 11.67258   | 4.8789563 | 5.381849  |
| 103.79778 | 54.787468 | 55.23336  | 43.289536  | 7.4206467 | 7.4934654 |
| 104.1069  | 112.54352 | 487.63858 | 241.50206  | 8.927469  | 8.59573   |
| 33.761803 | 24.822588 | 30.386644 | 34.351192  | 7.087643  | 7.210077  |
| 10.659899 | 11.817322 | 6.852397  | 12.693749  | 5.224572  | 6.315923  |
| 4.9999995 | 11.231161 | 14.706201 | 9.764679   | 6.87187   | 7.289172  |
| 6.8251214 | 11.381239 | 10.0069   | 8.180283   | 4.8281054 | 5.4447474 |
| 6.8251214 | 11.381239 | 10.0069   | 8.180283   | 4.8281054 | 5.4447474 |

|           |            |            |            |           |           |
|-----------|------------|------------|------------|-----------|-----------|
| 7.8272285 | 8.357157   | 10.250535  | 9.821284   | 6.930485  | 6.5517464 |
| 6.6574407 | 7.9084496  | 7.685308   | 7.80025    | 4.862937  | 6.5657587 |
| 6.6574407 | 7.9084496  | 7.685308   | 7.80025    | 4.862937  | 6.5657587 |
| 3.8823683 | 4.239607   | 3.8863428  | 3.9765046  | 2.742965  | 3.246647  |
| 4.9975    | 4.8327775  | 4.1396093  | 4.559895   | 4.331605  | 2.4279919 |
| 4.9975    | 4.8327775  | 4.1396093  | 4.559895   | 4.331605  | 2.4279919 |
| 8.391178  | 8.929193   | 8.598193   | 7.90727    | 7.027333  | 7.0325565 |
| 8.391178  | 8.929193   | 8.598193   | 7.90727    | 7.027333  | 7.0325565 |
| 6.9713655 | 5.864566   | 7.417538   | 7.1144567  | 4.934734  | 4.900222  |
| 6.9713655 | 5.864566   | 7.417538   | 7.1144567  | 4.934734  | 4.900222  |
| 6.9713655 | 5.864566   | 7.417538   | 7.1144567  | 4.934734  | 4.900222  |
| 3.5806754 | 3.678304   | 4.1675897  | 3.6918578  | 2.3467326 | 3.1313941 |
| 3.5806754 | 3.678304   | 4.1675897  | 3.6918578  | 2.3467326 | 3.1313941 |
| 3.5806754 | 3.678304   | 4.1675897  | 3.6918578  | 2.3467326 | 3.1313941 |
| 7.4377666 | 9.417315   | 7.057797   | 8.579748   | 5.885928  | 6.3799043 |
| 12.535432 | 11.972755  | 13.13357   | 12.8813505 | 10.497507 | 10.625169 |
| 4.7332783 | 4.289108   | 5.3939104  | 5.1689596  | 3.4127748 | 3.1568046 |
| 4.7332783 | 4.289108   | 5.3939104  | 5.1689596  | 3.4127748 | 3.1568046 |
| 8.12047   | 6.047019   | 7.6684155  | 7.30584    | 4.8446326 | 4.6193247 |
| 8.12047   | 6.047019   | 7.6684155  | 7.30584    | 4.8446326 | 4.6193247 |
| 4.096808  | 3.3328784  | 4.821272   | 4.435387   | 3.5225472 | 2.4279919 |
| 9.441012  | 8.359835   | 8.057017   | 8.250728   | 7.889124  | 9.230179  |
| 5.60286   | 6.9065914  | 4.964533   | 5.3099575  | 4.293543  | 3.6972954 |
| 9.958928  | 10.072502  | 9.167778   | 9.594307   | 8.708695  | 8.338426  |
| 5.205475  | 5.377553   | 4.8757076  | 5.1782045  | 3.9351397 | 3.4204826 |
| 7.008871  | 7.519272   | 5.993535   | 6.6414747  | 5.799244  | 4.3964095 |
| 11.951582 | 12.9224415 | 11.9368925 | 12.543884  | 10.781179 | 11.382436 |
| 11.282167 | 11.167049  | 10.5040245 | 10.765995  | 9.722932  | 10.000871 |
| 11.282167 | 11.167049  | 10.5040245 | 10.765995  | 9.722932  | 10.000871 |
| 11.776076 | 10.956213  | 10.79228   | 10.8700485 | 10.017597 | 10.67332  |
| 4.5625024 | 5.0135794  | 4.464936   | 4.125343   | 2.3467326 | 2.4279919 |
| 7.196364  | 4.464068   | 5.076396   | 4.687924   | 2.3467326 | 2.4279919 |
| 5.8396645 | 7.2676635  | 8.527192   | 8.272539   | 5.684752  | 6.9781785 |
| 5.8396645 | 7.2676635  | 8.527192   | 8.272539   | 5.684752  | 6.9781785 |
| 10.222787 | 10.797219  | 9.663778   | 10.3203125 | 9.204457  | 8.617914  |
| 10.528252 | 13.281222  | 11.865097  | 12.5612    | 9.278971  | 10.480659 |
| 6.2985687 | 7.275075   | 7.9996448  | 7.6871657  | 5.6404276 | 6.995111  |
| 8.561983  | 8.590928   | 7.894612   | 8.314643   | 6.3829923 | 7.0290794 |
| 7.8046746 | 8.024868   | 8.298724   | 8.924807   | 3.5169606 | 3.7271729 |
| 6.0557256 | 6.255379   | 6.534135   | 6.611933   | 3.7795494 | 4.4300017 |
| 9.013358  | 8.995454   | 8.670761   | 8.523654   | 7.9403963 | 7.8198905 |
| 7.06087   | 5.5886607  | 7.8213663  | 7.267085   | 5.6980553 | 4.537126  |
| 7.06087   | 5.5886607  | 7.8213663  | 7.267085   | 5.6980553 | 4.537126  |
| 7.06087   | 5.5886607  | 7.8213663  | 7.267085   | 5.6980553 | 4.537126  |
| 9.289892  | 8.517357   | 8.269833   | 8.452133   | 7.489456  | 6.4353776 |
| 9.289892  | 8.517357   | 8.269833   | 8.452133   | 7.489456  | 6.4353776 |
| 9.289892  | 8.517357   | 8.269833   | 8.452133   | 7.489456  | 6.4353776 |
| 9.289892  | 8.517357   | 8.269833   | 8.452133   | 7.489456  | 6.4353776 |
| 9.289892  | 8.517357   | 8.269833   | 8.452133   | 7.489456  | 6.4353776 |
| 6.7579703 | 5.203842   | 4.972126   | 5.058739   | 4.8728247 | 4.1421285 |
| 7.868254  | 10.598185  | 7.880502   | 9.794467   | 7.4165874 | 8.085681  |
| 12.580116 | 13.593259  | 10.397721  | 12.605001  | 11.36705  | 9.514151  |
| 8.118296  | 7.833856   | 8.773338   | 8.331963   | 7.4778247 | 7.156011  |
| 7.097624  | 6.6576986  | 6.737322   | 6.544054   | 6.218216  | 5.0705757 |
| 5.046386  | 5.0784626  | 4.193379   | 4.108478   | 3.2318087 | 2.4279919 |
| 7.3998876 | 7.111563   | 6.746698   | 7.050657   | 6.0947323 | 5.674794  |
| 9.270608  | 9.508995   | 9.728731   | 9.808744   | 7.0081854 | 6.1127987 |
| 6.9941425 | 6.042271   | 6.000761   | 5.872233   | 5.509366  | 5.984674  |
| 4.551494  | 4.498391   | 4.0814533  | 4.215843   | 3.803711  | 3.5167973 |
| 6.4189997 | 3.82294    | 7.425077   | 6.897148   | 3.562583  | 4.543818  |
| 3.4580486 | 4.3790574  | 4.7336884  | 4.4079237  | 4.0265036 | 3.4093049 |
| 3.4580486 | 4.3790574  | 4.7336884  | 4.4079237  | 4.0265036 | 3.4093049 |

|           |            |           |           |
|-----------|------------|-----------|-----------|
| 7.49635   | 7.3420224  | 7.657093  | 7.5822287 |
| 2.350709  | 5.7374434  | 3.1077106 | 4.748013  |
| 2.350709  | 5.7374434  | 3.1077106 | 4.748013  |
| 2.350709  | 2.5467792  | 2.8766468 | 2.8554862 |
| 4.5739746 | 3.2745988  | 3.9360118 | 3.0665069 |
| 4.5739746 | 3.2745988  | 3.9360118 | 3.0665069 |
| 7.1065903 | 7.9547024  | 7.898885  | 7.339766  |
| 7.1065903 | 7.9547024  | 7.898885  | 7.339766  |
| 5.3420205 | 5.876349   | 6.169448  | 5.54086   |
| 5.3420205 | 5.876349   | 6.169448  | 5.54086   |
| 5.3420205 | 5.876349   | 6.169448  | 5.54086   |
| 3.5101712 | 2.616294   | 3.0371811 | 2.7017462 |
| 3.5101712 | 2.616294   | 3.0371811 | 2.7017462 |
| 3.5101712 | 2.616294   | 3.0371811 | 2.7017462 |
| 6.016551  | 6.8289957  | 7.10093   | 6.8468814 |
| 10.518528 | 10.201367  | 11.137936 | 10.688578 |
| 2.350709  | 2.3408759  | 2.9085991 | 2.7629974 |
| 2.350709  | 2.3408759  | 2.9085991 | 2.7629974 |
| 4.904108  | 5.976059   | 5.225091  | 5.7253222 |
| 4.904108  | 5.976059   | 5.225091  | 5.7253222 |
| 3.97025   | 3.1699255  | 3.1095936 | 3.3862748 |
| 5.702269  | 7.7481146  | 7.1706767 | 7.322373  |
| 5.020739  | 4.7562895  | 4.5342627 | 4.8014026 |
| 9.08696   | 7.5194373  | 8.885209  | 8.308131  |
| 4.5450134 | 4.101447   | 4.5491076 | 3.8262122 |
| 6.549296  | 4.6318274  | 5.8395257 | 5.387936  |
| 10.385819 | 11.5615225 | 11.374494 | 11.407322 |
| 9.5945215 | 10.3476305 | 9.942313  | 10.130286 |
| 9.5945215 | 10.3476305 | 9.942313  | 10.130286 |
| 9.518845  | 9.960872   | 9.854203  | 9.887344  |
| 3.189057  | 3.6515532  | 4.101447  | 3.1508884 |
| 2.8877764 | 4.3029103  | 3.4660807 | 3.0177178 |
| 3.2139766 | 8.233379   | 4.8191915 | 7.1531315 |
| 3.2139766 | 8.233379   | 4.8191915 | 7.1531315 |
| 9.427729  | 9.046899   | 8.959087  | 8.9419365 |
| 6.8123584 | 10.969803  | 12.678185 | 12.032627 |
| 3.9452424 | 5.539167   | 2.9239688 | 4.755618  |
| 6.374604  | 7.0564795  | 6.5431466 | 6.638154  |
| 4.3183746 | 5.2479434  | 2.3618152 | 3.9216375 |
| 2.350709  | 4.5314713  | 4.1178923 | 4.169465  |
| 7.8594213 | 7.4805417  | 7.5460916 | 7.5621157 |
| 6.1615076 | 4.0761456  | 4.2916765 | 3.7733836 |
| 6.1615076 | 4.0761456  | 4.2916765 | 3.7733836 |
| 6.1615076 | 4.0761456  | 4.2916765 | 3.7733836 |
| 8.00898   | 6.559858   | 6.9987216 | 6.9227233 |
| 8.00898   | 6.559858   | 6.9987216 | 6.9227233 |
| 8.00898   | 6.559858   | 6.9987216 | 6.9227233 |
| 8.00898   | 6.559858   | 6.9987216 | 6.9227233 |
| 8.00898   | 6.559858   | 6.9987216 | 6.9227233 |
| 5.1676702 | 4.9801993  | 4.3231797 | 4.5645695 |
| 7.0504174 | 8.755194   | 7.511914  | 8.123682  |
| 12.1123   | 11.259593  | 9.077545  | 10.536766 |
| 8.046344  | 6.848503   | 7.5668983 | 7.2291    |
| 6.881053  | 5.6934676  | 5.5432744 | 5.555566  |
| 3.6769385 | 4.3509207  | 3.690627  | 3.843833  |
| 6.660993  | 6.0544424  | 6.052504  | 5.855347  |
| 6.6660466 | 7.161613   | 9.160876  | 8.451919  |
| 5.089528  | 4.820091   | 5.201601  | 5.5025525 |
| 3.5140042 | 3.673463   | 3.0783288 | 3.9674692 |
| 2.350709  | 3.6001558  | 4.150476  | 3.5749178 |
| 2.9399204 | 3.6191301  | 3.6034086 | 3.306817  |
| 2.9399204 | 3.6191301  | 3.6034086 | 3.306817  |

|               |             |             |           |    |           |
|---------------|-------------|-------------|-----------|----|-----------|
| ASHGA5P058233 | 6.09476E-05 | 0.007814388 | 3.5029966 | up | noncoding |
| ASHGA5P019758 | 0.007539673 | 0.054581432 | 2.1017047 | up | noncoding |
| ASHGA5P048229 | 0.018774576 | 0.083325418 | 2.1731903 | up | noncoding |
| ASHGA5P040805 | 0.002345623 | 0.031719059 | 2.6178864 | up | noncoding |
| ASHGA5P028982 | 0.011584167 | 0.066244722 | 4.9049256 | up | noncoding |
| ASHGA5P029695 | 0.020841213 | 0.088852355 | 2.0492451 | up | noncoding |
| ASHGA5P021779 | 0.011919384 | 0.066970246 | 2.2416072 | up | noncoding |
| ASHGA5P021779 | 0.011919384 | 0.066970246 | 2.2416072 | up | noncoding |
| ASHGA5P053420 | 0.000295665 | 0.012593001 | 2.5127246 | up | noncoding |
| ASHGA5P053420 | 0.000295665 | 0.012593001 | 2.5127246 | up | noncoding |
| ASHGA5P053590 | 0.000419662 | 0.014598519 | 2.925979  | up | noncoding |
| ASHGA5P023343 | 0.014097745 | 0.072819416 | 2.0700087 | up | noncoding |
| ASHGA5P031491 | 0.001141461 | 0.022709835 | 2.7244736 | up | noncoding |
| ASHGA5P053426 | 0.015265681 | 0.075646627 | 3.4905115 | up | noncoding |
| ASHGA5P047454 | 0.002327634 | 0.031698104 | 2.3649914 | up | noncoding |
| ASHGA5P047454 | 0.002327634 | 0.031698104 | 2.3649914 | up | noncoding |
| ASHGA5P032882 | 0.000186559 | 0.01146874  | 3.537921  | up | noncoding |
| ASHGA5P048847 | 0.027985353 | 0.104553957 | 2.072057  | up | noncoding |
| ASHGA5P019500 | 0.000205287 | 0.01146874  | 2.2665064 | up | noncoding |
| ASHGA5P019500 | 0.000205287 | 0.01146874  | 2.2665064 | up | noncoding |
| ASHGA5P019500 | 0.000205287 | 0.01146874  | 2.2665064 | up | noncoding |
| ASHGA5P019500 | 0.000205287 | 0.01146874  | 2.2665064 | up | noncoding |
| ASHGA5P052176 | 0.045264019 | 0.136923261 | 5.3556423 | up | noncoding |
| ASHGA5P038050 | 0.038189346 | 0.124228413 | 2.3653695 | up | noncoding |
| ASHGA5P030222 | 0.003565561 | 0.038481895 | 2.1671536 | up | noncoding |
| ASHGA5P031609 | 0.02127184  | 0.089913135 | 2.7108231 | up | noncoding |
| ASHGA5P031609 | 0.02127184  | 0.089913135 | 2.7108231 | up | noncoding |
| ASHGA5P031609 | 0.02127184  | 0.089913135 | 2.7108231 | up | noncoding |
| ASHGA5P036678 | 0.009643042 | 0.060938813 | 2.0202326 | up | noncoding |
| ASHGA5P028716 | 0.003063715 | 0.035804635 | 2.79383   | up | noncoding |
| ASHGA5P043150 | 0.004226782 | 0.04130748  | 2.0059552 | up | noncoding |
| ASHGA5P027965 | 0.012353901 | 0.068094238 | 2.2832466 | up | noncoding |
| ASHGA5P027965 | 0.012353901 | 0.068094238 | 2.2832466 | up | noncoding |
| ASHGA5P027965 | 0.012353901 | 0.068094238 | 2.2832466 | up | noncoding |
| ASHGA5P027965 | 0.012353901 | 0.068094238 | 2.2832466 | up | noncoding |
| ASHGA5P027965 | 0.012353901 | 0.068094238 | 2.2832466 | up | noncoding |
| ASHGA5P027965 | 0.012353901 | 0.068094238 | 2.2832466 | up | noncoding |
| ASHGA5P025988 | 0.000656655 | 0.017168766 | 3.3232276 | up | noncoding |
| ASHGA5P025988 | 0.000656655 | 0.017168766 | 3.3232276 | up | noncoding |
| ASHGA5P025988 | 0.000656655 | 0.017168766 | 3.3232276 | up | noncoding |
| ASHGA5P025988 | 0.000656655 | 0.017168766 | 3.3232276 | up | noncoding |
| ASHGA5P058526 | 0.001735063 | 0.027807594 | 3.6667672 | up | noncoding |
| ASHGA5P030337 | 0.016927018 | 0.079250679 | 2.5103755 | up | noncoding |
| ASHGA5P036844 | 0.049417546 | 0.144516069 | 2.2154665 | up | noncoding |
| ASHGA5P034471 | 0.004172267 | 0.041167338 | 4.534002  | up | noncoding |
| ASHGA5P037513 | 0.001409909 | 0.025119259 | 3.1456113 | up | noncoding |
| ASHGA5P037513 | 0.001409909 | 0.025119259 | 3.1456113 | up | noncoding |
| ASHGA5P037513 | 0.001409909 | 0.025119259 | 3.1456113 | up | noncoding |
| ASHGA5P038151 | 0.001234336 | 0.023574374 | 2.1646267 | up | noncoding |
| ASHGA5P022834 | 0.019605583 | 0.085393317 | 3.8997606 | up | noncoding |
| ASHGA5P038746 | 0.000768329 | 0.018599313 | 2.0219844 | up | noncoding |
| ASHGA5P017188 | 0.002669178 | 0.033470143 | 6.1438984 | up | noncoding |
| ASHGA5P044925 | 0.000437132 | 0.014669266 | 3.1735727 | up | noncoding |
| ASHGA5P044925 | 0.000437132 | 0.014669266 | 3.1735727 | up | noncoding |
| ASHGA5P042482 | 0.008658899 | 0.058001887 | 2.3345408 | up | noncoding |
| ASHGA5P042482 | 0.008658899 | 0.058001887 | 2.3345408 | up | noncoding |
| ASHGA5P042482 | 0.008658899 | 0.058001887 | 2.3345408 | up | noncoding |
| ASHGA5P015253 | 0.043102032 | 0.13312867  | 3.7282937 | up | noncoding |
| ASHGA5P058657 | 3.0333E-05  | 0.005526678 | 3.8498244 | up | noncoding |
| ASHGA5P020516 | 0.003425232 | 0.037690616 | 2.0185337 | up | noncoding |
| ASHGA5P022824 | 0.000354925 | 0.013460607 | 2.2690839 | up | noncoding |
| ASHGA5P022824 | 0.000354925 | 0.013460607 | 2.2690839 | up | noncoding |
| ASHGA5P028559 | 0.000504064 | 0.015567285 | 3.7949139 | up | noncoding |

|                 |               |                     |      |       |   |
|-----------------|---------------|---------------------|------|-------|---|
| TCONS_00028402  | XLOC_013754   | LincRNAs identified | 514  | chr20 | - |
| ENST00000502693 | RP11-323F5.2  | GENCODE             | 724  | chr4  | + |
| TCONS_00013381  | XLOC_006016   | LincRNAs identified | 2334 | chr7  | + |
| ENST00000445225 | RP11-277L2.2  | GENCODE             | 5730 | chr1  | + |
| ENST00000548107 | CTD-2314B22.3 | GENCODE             | 617  | chr14 | - |
| ENST00000554181 | RP11-736P16.1 | GENCODE             | 412  | chr14 | + |
| NR_037793       | LRR1          | RefSeq              | 1853 | chr14 | + |
| NR_037793       | LRR1          | RefSeq              | 1853 | chr14 | + |
| ENST00000443799 | GAS5          | GENCODE             | 897  | chr1  | - |
| ENST00000443799 | GAS5          | GENCODE             | 897  | chr1  | - |
| ENST00000521207 | RP13-582O9.5  | GENCODE             | 429  | chr8  | - |
| ENST00000584327 | SNHG15        | GENCODE             | 505  | chr7  | - |
| NR_047572       | LOC100128770  | RefSeq              | 3061 | chr16 | + |
| ENST00000534117 | RP11-163N6.2  | GENCODE             | 502  | chr8  | - |
| AY034104        |               | LincRNAs identified | 306  | chr2  | + |
| AY034104        |               | LincRNAs identified | 306  | chr2  | + |
| NR_027179       | C17orf76-AS1  | RefSeq              | 376  | chr17 | + |
| ENST00000561107 | RP11-752G15.6 | GENCODE             | 790  | chr15 | + |
| ENST00000488310 | RP4-584D14.5  | GENCODE             | 577  | chr7  | - |
| ENST00000488310 | RP4-584D14.5  | GENCODE             | 577  | chr7  | - |
| ENST00000488310 | RP4-584D14.5  | GENCODE             | 577  | chr7  | - |
| ENST00000488310 | RP4-584D14.5  | GENCODE             | 577  | chr7  | - |
| ENST00000504989 | RP11-325I22.2 | GENCODE             | 1616 | chr5  | - |
| ENST00000426112 | RP3-439F8.1   | GENCODE             | 2949 | chr22 | + |
| uc002blm.3      | DQ596274      | UCSC_knowngene      | 260  | chr15 | - |
| ENST00000568827 | RP11-21M24.2  | GENCODE             | 1415 | chr16 | + |
| ENST00000568827 | RP11-21M24.2  | GENCODE             | 1415 | chr16 | + |
| ENST00000568827 | RP11-21M24.2  | GENCODE             | 1415 | chr16 | + |
| uc002wrh.3      | HSPC072       | UCSC_knowngene      | 1951 | chr20 | - |
| uc001unz.1      | AK093279      | UCSC_knowngene      | 2100 | chr13 | + |
| uc003uch.1      | PMS2L2        | UCSC_knowngene      | 957  | chr7  | - |
| ENST00000547866 | RP11-386G11.5 | GENCODE             | 2114 | chr12 | + |
| ENST00000547866 | RP11-386G11.5 | GENCODE             | 2114 | chr12 | + |
| ENST00000547866 | RP11-386G11.5 | GENCODE             | 2114 | chr12 | + |
| ENST00000547866 | RP11-386G11.5 | GENCODE             | 2114 | chr12 | + |
| ENST00000547866 | RP11-386G11.5 | GENCODE             | 2114 | chr12 | + |
| NR_047694       | PIGT          | RefSeq              | 2068 | chr20 | + |
| NR_047694       | PIGT          | RefSeq              | 2068 | chr20 | + |
| NR_047694       | PIGT          | RefSeq              | 2068 | chr20 | + |
| NR_047694       | PIGT          | RefSeq              | 2068 | chr20 | + |
| uc009xzb.3      | CASC2         | UCSC_knowngene      | 2333 | chr10 | + |
| TCONS_00008667  | XLOC_004182   | LincRNAs identified | 1012 | chr4  | - |
| ENST00000438154 | RP5-1112F19.2 | GENCODE             | 2326 | chr20 | - |
| ENST00000431363 | ZNF833P       | pseudogene          | 1407 | chr19 | + |
| ENST00000417820 | AL773604.8    | GENCODE             | 1031 | chr21 | + |
| ENST00000417820 | AL773604.8    | GENCODE             | 1031 | chr21 | + |
| ENST00000417820 | AL773604.8    | GENCODE             | 1031 | chr21 | + |
| ENST00000565519 | RP11-384L8.1  | GENCODE             | 1891 | chr3  | - |
| ENST00000563823 | AC004158.2    | GENCODE             | 563  | chr16 | - |
| TCONS_00023262  | XLOC_011248   | LincRNAs identified | 3624 | chr15 | + |
| ENST00000438702 | RP5-881L22.5  | GENCODE             | 754  | chr20 | - |
| NR_024522       | TMEM67        | RefSeq              | 3381 | chr8  | + |
| NR_024522       | TMEM67        | RefSeq              | 3381 | chr8  | + |
| uc003pdp.3      | KIAA1702      | UCSC_knowngene      | 4385 | chr6  | + |
| uc003pdp.3      | KIAA1702      | UCSC_knowngene      | 4385 | chr6  | + |
| uc003pdp.3      | KIAA1702      | UCSC_knowngene      | 4385 | chr6  | + |
| ENST00000418442 | AC005062.2    | GENCODE             | 587  | chr7  | - |
| Y13808          |               | RNAdb               | 205  | chr3  | + |
| ENST00000515065 | RP11-423H2.1  | GENCODE             | 628  | chr5  | + |
| NR_028477       | RBMX          | RefSeq              | 2132 | chrX  | - |
| NR_028477       | RBMX          | RefSeq              | 2132 | chrX  | - |
| ENST00000438752 | DLEU2         | GENCODE             | 2090 | chr13 | - |



|           |           |                                            |                       |
|-----------|-----------|--------------------------------------------|-----------------------|
| 43766346  | 43767617  | TCAACATCAGTGTACAGAGCTTTGG                  | intergenic            |
| 4543966   | 4639631   | CAGGATAGAGCAAACATTGAGTGGC                  | natural antisense     |
| 25878710  | 25888418  | ACTGGAAACCAGAAGTAATGTCAGC                  | intergenic            |
| 149576489 | 149651107 | ENST00000325963, AGATATGCACTTGGCCTGAGAAATG | intergenic            |
| 19912754  | 19925311  | ENST00000547779, TAAAGGGGGCTCTCTGGCCTTGAAA | intergenic            |
| 87402983  | 87455469  | CACAGTTTAGAGATTTGAAAGCCCA                  | intergenic            |
| 50065414  | 50081390  | ENST00000298288, AGTTATGAAGCT/ 122769      | exon sense-overlappi  |
| 50065414  | 50081390  | ENST00000298288, AGTTATGAAGCT/ 122769      | exon sense-overlappi  |
| 173834490 | 173837127 | ENST00000421068, TGTAATGCAGC( 60674        | bidirectional         |
| 173834490 | 173837127 | ENST00000421068, TGTAATGCAGC( 60674        | bidirectional         |
| 144363195 | 144363780 | GTGAAAAAATGTGAATTGTTCTACT                  | intergenic            |
| 45022735  | 45026159  | ENST00000582727, ACTGTCACAGCA/ 285958      | intergenic            |
| 3082481   | 3089133   | GGCCATGGGAGG 100128770                     | natural antisense     |
| 61324898  | 61325813  | GGGAGCCATCTCATCTTTATAACCT                  | intergenic            |
| 75186481  | 75252012  | TGGAAAAAGTAAGCCTAAATCGGGT                  | exon sense-overlappi  |
| 75186481  | 75252012  | TGGAAAAAGTAAGCCTAAATCGGGT                  | exon sense-overlappi  |
| 16342300  | 16344525  | ENST00000460249, GTAAGCCTTGAG( 125144      | intergenic            |
| 83419323  | 83425956  | ENST00000558174 TCTGTTCTAGATGTTTTCTTCTAAAT | natural antisense     |
| 150060865 | 150069679 | ATGGAGCTAGACTACTCTCCTGTTT                  | natural antisense     |
| 150060865 | 150069679 | ATGGAGCTAGACTACTCTCCTGTTT                  | natural antisense     |
| 150060865 | 150069679 | ATGGAGCTAGACTACTCTCCTGTTT                  | natural antisense     |
| 150060865 | 150069679 | ATGGAGCTAGACTACTCTCCTGTTT                  | natural antisense     |
| 1363696   | 1380182   | ATGTGCGCTATTGTTAGATCTCCGG/                 | intergenic            |
| 46937391  | 46944093  | GTTTTCTGCTTGGAAGTTGCCAGA/                  | intergenic            |
| 85747305  | 85747565  | ENST00000335068, AGTACATATTGGCCAGCGGCTCCGA | intergenic            |
| 22386179  | 22387594  | GCAGCTGATGGAAGACAACAGGGCC                  | intronic antisense    |
| 22386179  | 22387594  | GCAGCTGATGGAAGACAACAGGGCC                  | intronic antisense    |
| 22386179  | 22387594  | GCAGCTGATGGAAGACAACAGGGCC                  | natural antisense     |
| 18768614  | 18775228  | TGCTTCTTGGAI 29075                         | intergenic            |
| 21872311  | 21906571  | CTGCTCACATCTGGTCTGTTCCCCAC                 | intergenic            |
| 74880904  | 74987787  | ACATCCTAATTTT 5380                         | intergenic            |
| 49392154  | 49412980  | ATCGGCCTCTAACACTGCAAGATTT                  | natural antisense     |
| 49392154  | 49412980  | ATCGGCCTCTAACACTGCAAGATTT                  | natural antisense     |
| 49392154  | 49412980  | ATCGGCCTCTAACACTGCAAGATTT                  | natural antisense     |
| 49392154  | 49412980  | ATCGGCCTCTAACACTGCAAGATTT                  | natural antisense     |
| 49392154  | 49412980  | ATCGGCCTCTAACACTGCAAGATTT                  | natural antisense     |
| 44044706  | 44054885  | CGGGAAGGAGTG 51604                         | exon sense-overlappi  |
| 44044706  | 44054885  | CGGGAAGGAGTG 51604                         | exon sense-overlappi  |
| 44044706  | 44054885  | CGGGAAGGAGTG 51604                         | exon sense-overlappi  |
| 44044706  | 44054885  | CGGGAAGGAGTG 51604                         | exon sense-overlappi  |
| 119806331 | 119859647 | CTTCCCCAAGGA/ 255082                       | bidirectional         |
| 178141536 | 178148458 | TCONS_00009177 CGTGGTACATAGAAGCTGAGCAACT   | intergenic            |
| 50448335  | 50479451  | GAATTGTGCATGCAACTTCCAATCT                  | intergenic            |
| 11759178  | 11763692  | GTTGCTTTTCGTA 401898                       |                       |
| 46222491  | 46224632  | CAGGAGCATCAATTTAACCCAAAGA                  | bidirectional         |
| 46222491  | 46224632  | CAGGAGCATCAATTTAACCCAAAGA                  | bidirectional         |
| 46222491  | 46224632  | CAGGAGCATCAATTTAACCCAAAGA                  | bidirectional         |
| 32278179  | 32280070  | CAAGCATTATGCATGACATTTAGTG                  | bidirectional         |
| 72557230  | 72661585  | ENST00000563770 GCAAAGAAACAAGAAGAGCTTAAAC  | intergenic            |
| 50655997  | 50660476  | ACTATCTGGAAAAGTGTGCTAATAG                  | intergenic            |
| 42976191  | 42983825  | GGAGACAGAGGAGCATTAGGCTACT                  | natural antisense     |
| 94767071  | 94831460  | ACTATGAATGCT( 91147                        | exon sense-overlappi  |
| 94767071  | 94831460  | ACTATGAATGCT( 91147                        | exon sense-overlappi  |
| 56965018  | 56969403  | TTGTGGATTTGACTTCTCTGATTCCCT                | exon sense-overlappi  |
| 56965018  | 56969403  | TTGTGGATTTGACTTCTCTGATTCCCT                | intron sense-overlapp |
| 56965018  | 56969403  | TTGTGGATTTGACTTCTCTGATTCCCT                | intron sense-overlapp |
| 20046727  | 20171342  | CTTTGACAAGATAAGAATAACAATC                  | intergenic            |
| 15907723  | 15907924  | CTATCCTGGGTAGGTAGGACCTATA                  | intergenic            |
| 177236407 | 177310917 | GACAGGAATGCTACCCAGAAGTGA                   | intergenic            |
| 135955605 | 135962939 | GCAGTATTTGGC/ 27316                        | exon sense-overlappi  |
| 135955605 | 135962939 | GCAGTATTTGGC/ 27316                        | exon sense-overlappi  |
| 50617571  | 50656114  | CAGAGATACAGCTTCTTATAGTAAC                  | bidirectional         |

|                 |           |                         |   |           |           |
|-----------------|-----------|-------------------------|---|-----------|-----------|
| ENST00000507908 | STX18     | syntaxin 18 [Source:]   | - | 4426899   | 4544073   |
| NM_152329       | LRR1      | leucine-rich repeat pr  | + | 50065414  | 50081390  |
| NM_203467       | LRR1      | leucine-rich repeat pr  | + | 50065414  | 50081390  |
| NM_001122770    | ZBTB37    | zinc finger and BTB     | + | 173837492 | 173855774 |
| NM_032522       | ZBTB37    | zinc finger and BTB     | + | 173837492 | 173842778 |
| NM_001103175    | CCDC64B   | bicaudal D-related pr   | - | 3077867   | 3085542   |
| ENST00000483063 | POLE4     | polymerase (DNA-di      | + | 75185618  | 75197255  |
| NM_019896       | POLE4     | DNA polymerase eps      | + | 75185774  | 75196859  |
| ENST00000334574 | FSD2      | fibronectin type III a  | - | 83424113  | 83474821  |
| NM_001099695    | REPIN1    | replication initiator 1 | + | 150065878 | 150071133 |
| NM_001099696    | REPIN1    | replication initiator 1 | + | 150065878 | 150071133 |
| NM_013400       | REPIN1    | replication initiator 1 | + | 150065878 | 150071133 |
| NM_014374       | REPIN1    | replication initiator 1 | + | 150068257 | 150071133 |
| ENST00000563573 | CDR2      | cerebellar degenerati   | - | 22360692  | 22444986  |
| ENST00000564542 | CDR2      | cerebellar degenerati   | - | 22358795  | 22442917  |
| ENST00000567406 | CDR2      | cerebellar degenerati   | - | 22359075  | 22386411  |
| NM_001206709    | PRKAG1    | 5'-AMP-activated pr     | - | 49396054  | 49412629  |
| NM_001206710    | PRKAG1    | 5'-AMP-activated pr     | - | 49396054  | 49412531  |
| NM_002733       | PRKAG1    | 5'-AMP-activated pr     | - | 49396054  | 49412629  |
| NM_003482       | MLL2      | histone-lysine N-met    | - | 49412757  | 49449107  |
| NM_015086       | DDN       | dendrin                 | - | 49388932  | 49393088  |
| NM_001184728    | PIGT      | GPI transamidase coi    | + | 44044706  | 44054885  |
| NM_001184729    | PIGT      | GPI transamidase coi    | + | 44044706  | 44054885  |
| NM_001184730    | PIGT      | GPI transamidase coi    | + | 44044706  | 44054885  |
| NM_015937       | PIGT      | GPI transamidase coi    | + | 44044706  | 44054885  |
| NM_014904       | RAB11FIP2 | rab11 family-interact   | - | 119764426 | 119806114 |
| NM_001202489    | UBE2G2    | ubiquitin-conjugating   | - | 46188494  | 46221751  |
| NM_003343       | UBE2G2    | ubiquitin-conjugating   | - | 46188494  | 46221751  |
| NM_182688       | UBE2G2    | ubiquitin-conjugating   | - | 46188494  | 46221751  |
| NM_178868       | CMTM8     | CKLF-like MARVEL        | + | 32280170  | 32411813  |
| NM_178491       | R3HDML    | peptidase inhibitor R   | + | 42965625  | 42979875  |
| NM_001142301    | TMEM67    | Meckelin isoform 2      | + | 94767071  | 94830347  |
| NM_153704       | TMEM67    | Meckelin isoform 1      | + | 94767071  | 94830347  |
| NM_001257273    | ZNF451    | zinc finger protein 4   | + | 56954807  | 56974512  |
| NM_001031623    | ZNF451    | zinc finger protein 4   | + | 56954827  | 57035098  |
| NM_015555       | ZNF451    | zinc finger protein 4   | + | 56954827  | 57035098  |
| NM_001164803    | RBMX      | RNA-binding motif       | - | 135951352 | 135962939 |
| NM_002139       | RBMX      | RNA-binding motif       | - | 135955605 | 135962939 |
| ENST00000378180 | DLEU1     | deleted in lymphocyt    | + | 50656306  | 50679433  |

|             |            |           |           |           |            |
|-------------|------------|-----------|-----------|-----------|------------|
| 30.180638   | 6.031173   | 4.527087  | 2.718497  | 37.913578 | 13.027849  |
| 100.682292  | 27.610373  | 6.167043  | 5.095483  | 141.71266 | 181.19125  |
| 19.96633    | 6.926253   | 3.990961  | 2.871147  | 24.199226 | 17.449657  |
| 44.16954    | 10.988113  | 5.086963  | 3.698561  | 38.865776 | 24.79957   |
| 949.278533  | 89.21627   | 8.773142  | 6.478911  | 1472.6993 | 128.44197  |
| 166.403098  | 61.847462  | 6.990346  | 5.955254  | 213.64847 | 217.20482  |
| 742.489177  | 202.480672 | 9.075136  | 7.910602  | 587.1631  | 627.8376   |
| 742.489177  | 202.480672 | 9.075136  | 7.910602  | 587.1631  | 627.8376   |
| 747.294217  | 179.550778 | 9.139845  | 7.810593  | 761.6602  | 803.93665  |
| 747.294217  | 179.550778 | 9.139845  | 7.810593  | 761.6602  | 803.93665  |
| 285.157073  | 61.628205  | 7.753319  | 6.2044    | 264.18216 | 188.66405  |
| 351.553933  | 100.70103  | 7.996338  | 6.946701  | 466.14822 | 557.10046  |
| 60.191781   | 15.132957  | 5.566352  | 4.120374  | 66.42745  | 66.84981   |
| 69.001243   | 12.990811  | 5.681787  | 3.878348  | 86.61041  | 64.11088   |
| 132.8721    | 34.905853  | 6.638831  | 5.396996  | 147.82242 | 200.66762  |
| 132.8721    | 34.905853  | 6.638831  | 5.396996  | 147.82242 | 200.66762  |
| 2093.033323 | 314.79383  | 10.474488 | 8.651587  | 2254.7102 | 3644.3713  |
| 4649.178433 | 1264.18391 | 11.660671 | 10.609607 | 3608.7717 | 4938.589   |
| 240.170155  | 67.004207  | 7.526584  | 6.346114  | 274.31116 | 218.32439  |
| 240.170155  | 67.004207  | 7.526584  | 6.346114  | 274.31116 | 218.32439  |
| 240.170155  | 67.004207  | 7.526584  | 6.346114  | 274.31116 | 218.32439  |
| 240.170155  | 67.004207  | 7.526584  | 6.346114  | 274.31116 | 218.32439  |
| 672.419884  | 33.794902  | 7.313934  | 4.892874  | 136.8477  | 209.07147  |
| 26.024581   | 6.882567   | 4.149061  | 2.906996  | 38.331066 | 10.555879  |
| 820.214605  | 227.888507 | 9.249365  | 8.133563  | 822.94073 | 1038.4177  |
| 24.389535   | 6.715916   | 4.162711  | 2.72398   | 50.53801  | 23.614916  |
| 24.389535   | 6.715916   | 4.162711  | 2.72398   | 50.53801  | 23.614916  |
| 24.389535   | 6.715916   | 4.162711  | 2.72398   | 50.53801  | 23.614916  |
| 92.664134   | 30.672569  | 6.163441  | 5.14892   | 104.04867 | 120.41079  |
| 866.930508  | 185.07115  | 9.357194  | 7.87495   | 847.7125  | 657.6028   |
| 597.986425  | 183.799252 | 8.796334  | 7.792044  | 605.0208  | 495.4487   |
| 24.374645   | 7.65744    | 4.243622  | 3.052536  | 28.644432 | 31.052261  |
| 24.374645   | 7.65744    | 4.243622  | 3.052536  | 28.644432 | 31.052261  |
| 24.374645   | 7.65744    | 4.243622  | 3.052536  | 28.644432 | 31.052261  |
| 24.374645   | 7.65744    | 4.243622  | 3.052536  | 28.644432 | 31.052261  |
| 24.374645   | 7.65744    | 4.243622  | 3.052536  | 28.644432 | 31.052261  |
| 24.374645   | 7.65744    | 4.243622  | 3.052536  | 28.644432 | 31.052261  |
| 231.222397  | 46.843199  | 7.463499  | 5.730914  | 284.7869  | 291.10046  |
| 231.222397  | 46.843199  | 7.463499  | 5.730914  | 284.7869  | 291.10046  |
| 231.222397  | 46.843199  | 7.463499  | 5.730914  | 284.7869  | 291.10046  |
| 231.222397  | 46.843199  | 7.463499  | 5.730914  | 284.7869  | 291.10046  |
| 29.339801   | 5.720599   | 4.47398   | 2.599471  | 38.615795 | 24.096125  |
| 71.791815   | 11.828926  | 4.868718  | 3.540815  | 117.07822 | 236.3781   |
| 28.098253   | 12.429889  | 4.371566  | 3.223955  | 18.904844 | 9.479187   |
| 608.74877   | 83.883464  | 8.690391  | 6.509606  | 460.9541  | 578.5543   |
| 38.432153   | 7.90762    | 4.83453   | 3.181189  | 42.633415 | 58.540306  |
| 38.432153   | 7.90762    | 4.83453   | 3.181189  | 42.633415 | 58.540306  |
| 38.432153   | 7.90762    | 4.83453   | 3.181189  | 42.633415 | 58.540306  |
| 722.464765  | 208.744442 | 9.066992  | 7.952874  | 753.9753  | 491.60336  |
| 96.77571    | 18.596141  | 6.111471  | 4.148085  | 145.0085  | 92.08457   |
| 472.101097  | 126.943156 | 8.344559  | 7.328788  | 564.9059  | 898.8594   |
| 3574.642433 | 369.231105 | 11.324755 | 8.7056    | 3981.1594 | 4407.7344  |
| 308.532148  | 54.605703  | 7.757131  | 6.091023  | 208.84735 | 181.71819  |
| 308.532148  | 54.605703  | 7.757131  | 6.091023  | 208.84735 | 181.71819  |
| 194.07315   | 47.2598    | 7.101414  | 5.878275  | 243.06213 | 124.43907  |
| 194.07315   | 47.2598    | 7.101414  | 5.878275  | 243.06213 | 124.43907  |
| 194.07315   | 47.2598    | 7.101414  | 5.878275  | 243.06213 | 124.43907  |
| 83.261372   | 22.815149  | 5.972907  | 4.074391  | 80.5054   | 97.807594  |
| 592.28537   | 89.260489  | 8.754232  | 6.809439  | 719.2972  | 886.72394  |
| 906.187972  | 257.615658 | 9.370362  | 8.357055  | 784.7938  | 1003.23553 |
| 387.283195  | 108.07246  | 8.209409  | 7.027299  | 409.1646  | 413.0881   |
| 387.283195  | 108.07246  | 8.209409  | 7.027299  | 409.1646  | 413.0881   |
| 1029.733025 | 147.899659 | 9.364959  | 7.440891  | 1580.778  | 1200.1613  |

|            |            |            |            |            |            |
|------------|------------|------------|------------|------------|------------|
| 37.44557   | 41.817738  | 22.03727   | 28.841824  | 5.2477345  | 4.9999995  |
| 69.224266  | 94.315     | 49.26294   | 68.387634  | 25.211477  | 28.288355  |
| 25.258509  | 22.1652    | 12.820798  | 17.90459   | 4.9999995  | 4.9999995  |
| 46.1811    | 42.506756  | 47.138145  | 65.525894  | 15.380679  | 7.227844   |
| 2554.5718  | 862.025    | 140.84023  | 537.0929   | 129.0742   | 70.58612   |
| 168.28502  | 141.79005  | 119.359726 | 138.1305   | 74.30176   | 23.592213  |
| 504.3705   | 1227.8982  | 563.2071   | 944.45856  | 154.6595   | 112.5504   |
| 504.3705   | 1227.8982  | 563.2071   | 944.45856  | 154.6595   | 112.5504   |
| 711.5024   | 896.8989   | 504.95898  | 804.80817  | 151.70259  | 107.789566 |
| 711.5024   | 896.8989   | 504.95898  | 804.80817  | 151.70259  | 107.789566 |
| 270.94043  | 375.43756  | 237.13072  | 374.58752  | 57.69145   | 30.661633  |
| 335.9288   | 294.79837  | 185.1417   | 270.20605  | 105.543785 | 124.94121  |
| 54.378593  | 57.644768  | 50.632927  | 65.21714   | 14.588209  | 7.2879224  |
| 106.426216 | 35.293224  | 62.127598  | 59.43913   | 17.107908  | 19.446291  |
| 79.516975  | 108.584496 | 108.02828  | 152.61281  | 27.857742  | 30.898499  |
| 79.516975  | 108.584496 | 108.02828  | 152.61281  | 27.857742  | 30.898499  |
| 961.66364  | 1080.527   | 2367.5308  | 2249.397   | 303.33258  | 269.85583  |
| 2107.4067  | 6079.5825  | 4321.8022  | 6838.9185  | 1356.566   | 748.1012   |
| 320.6174   | 235.86894  | 169.1151   | 222.78394  | 64.56095   | 37.01028   |
| 320.6174   | 235.86894  | 169.1151   | 222.78394  | 64.56095   | 37.01028   |
| 320.6174   | 235.86894  | 169.1151   | 222.78394  | 64.56095   | 37.01028   |
| 320.6174   | 235.86894  | 169.1151   | 222.78394  | 64.56095   | 37.01028   |
| 52.683865  | 2488.583   | 15.5413685 | 1131.7919  | 40.44125   | 12.654268  |
| 56.80878   | 14.839899  | 18.565649  | 17.046211  | 8.948438   | 4.9999995  |
| 484.9108   | 658.6643   | 945.5024   | 970.8517   | 205.1776   | 117.02958  |
| 15.656108  | 24.694073  | 13.749121  | 18.08498   | 4.9999995  | 4.9999995  |
| 15.656108  | 24.694073  | 13.749121  | 18.08498   | 4.9999995  | 4.9999995  |
| 15.656108  | 24.694073  | 13.749121  | 18.08498   | 4.9999995  | 4.9999995  |
| 79.4304    | 68.64398   | 89.386826  | 94.06414   | 26.899837  | 15.026337  |
| 995.5761   | 730.44867  | 961.99994  | 1008.24304 | 199.6254   | 238.53978  |
| 671.1199   | 798.12585  | 360.1644   | 658.0389   | 174.0722   | 81.6239    |
| 20.074385  | 33.536835  | 13.89647   | 19.04349   | 6.6936774  | 4.9999995  |
| 20.074385  | 33.536835  | 13.89647   | 19.04349   | 6.6936774  | 4.9999995  |
| 20.074385  | 33.536835  | 13.89647   | 19.04349   | 6.6936774  | 4.9999995  |
| 20.074385  | 33.536835  | 13.89647   | 19.04349   | 6.6936774  | 4.9999995  |
| 20.074385  | 33.536835  | 13.89647   | 19.04349   | 6.6936774  | 4.9999995  |
| 248.02568  | 174.81407  | 172.17354  | 216.43373  | 50.516502  | 22.602594  |
| 248.02568  | 174.81407  | 172.17354  | 216.43373  | 50.516502  | 22.602594  |
| 248.02568  | 174.81407  | 172.17354  | 216.43373  | 50.516502  | 22.602594  |
| 248.02568  | 174.81407  | 172.17354  | 216.43373  | 50.516502  | 22.602594  |
| 48.28      | 22.45579   | 16.723171  | 25.867924  | 5.851781   | 4.9999995  |
| 10.11711   | 14.53135   | 22.909548  | 29.736563  | 21.439781  | 22.131569  |
| 31.106272  | 42.024685  | 27.220642  | 39.853886  | 4.9999995  | 4.9999995  |
| 220.06137  | 414.32968  | 1019.16077 | 959.4324   | 94.14952   | 35.53095   |
| 19.029182  | 27.2638    | 37.63786   | 45.488354  | 5.9994035  | 5.334133   |
| 19.029182  | 27.2638    | 37.63786   | 45.488354  | 5.9994035  | 5.334133   |
| 19.029182  | 27.2638    | 37.63786   | 45.488354  | 5.9994035  | 5.334133   |
| 1037.5477  | 558.63495  | 699.50824  | 793.51904  | 189.49252  | 112.24147  |
| 163.01875  | 73.20155   | 44.215088  | 63.1258    | 17.69775   | 4.9999995  |
| 204.14285  | 472.10413  | 276.82697  | 415.76733  | 132.02429  | 161.3283   |
| 3083.2634  | 3892.4253  | 1909.5201  | 4173.752   | 282.041    | 278.79047  |
| 233.65584  | 562.64484  | 194.57657  | 469.7501   | 51.547615  | 45.59426   |
| 233.65584  | 562.64484  | 194.57657  | 469.7501   | 51.547615  | 45.59426   |
| 359.0329   | 209.31873  | 87.69421   | 140.89186  | 46.75512   | 40.08135   |
| 359.0329   | 209.31873  | 87.69421   | 140.89186  | 46.75512   | 40.08135   |
| 359.0329   | 209.31873  | 87.69421   | 140.89186  | 46.75512   | 40.08135   |
| 64.101364  | 126.53542  | 43.81032   | 86.808136  | 37.272     | 6.8270392  |
| 564.30945  | 542.9899   | 314.49518  | 525.89655  | 99.663956  | 99.21933   |
| 517.0586   | 1357.4551  | 738.6805   | 1035.9043  | 245.42752  | 214.14044  |
| 377.30353  | 433.23544  | 277.06586  | 413.84164  | 130.19997  | 95.513824  |
| 377.30353  | 433.23544  | 277.06586  | 413.84164  | 130.19997  | 95.513824  |
| 1876.4532  | 331.76517  | 582.93494  | 606.30554  | 180.9771   | 96.18286   |

|           |            |           |           |            |           |
|-----------|------------|-----------|-----------|------------|-----------|
| 6.2105436 | 8.180477   | 4.9999995 | 6.5482845 | 4.78003    | 3.7461262 |
| 25.048714 | 31.156021  | 33.641014 | 22.316658 | 6.6963983  | 7.2598467 |
| 4.9999995 | 8.984909   | 7.950448  | 9.622162  | 4.14022    | 4.1271    |
| 11.81045  | 14.14843   | 8.797504  | 8.56377   | 4.816172   | 4.5872583 |
| 212.98692 | 48.024227  | 38.862076 | 35.76408  | 10.057912  | 6.77469   |
| 156.05122 | 37.216873  | 49.87213  | 30.050577 | 7.289172   | 7.5055323 |
| 197.64062 | 148.13876  | 383.79935 | 218.0954  | 8.723602   | 8.976759  |
| 197.64062 | 148.13876  | 383.79935 | 218.0954  | 8.723602   | 8.976759  |
| 231.04457 | 195.1392   | 208.8011  | 182.82764 | 9.109694   | 9.322119  |
| 231.04457 | 195.1392   | 208.8011  | 182.82764 | 9.109694   | 9.322119  |
| 69.37803  | 50.934856  | 92.63337  | 68.469894 | 7.5907454  | 7.3188386 |
| 57.70037  | 146.5902   | 72.651276 | 96.77934  | 8.38964    | 8.811726  |
| 20.391397 | 12.01023   | 21.903612 | 14.616371 | 5.594424   | 5.888313  |
| 4.9999995 | 12.993561  | 10.192538 | 13.204571 | 5.981959   | 5.832124  |
| 18.49834  | 52.9675    | 37.747665 | 41.46537  | 6.751892   | 7.398277  |
| 18.49834  | 52.9675    | 37.747665 | 41.46537  | 6.751892   | 7.398277  |
| 327.3382  | 240.42647  | 448.50137 | 299.30853 | 10.667007  | 11.409957 |
| 2172.0818 | 872.09186  | 1499.5282 | 936.7344  | 11.335681  | 11.808327 |
| 97.41837  | 74.85284   | 74.746086 | 53.436714 | 7.6442246  | 7.512378  |
| 97.41837  | 74.85284   | 74.746086 | 53.436714 | 7.6442246  | 7.512378  |
| 97.41837  | 74.85284   | 74.746086 | 53.436714 | 7.6442246  | 7.512378  |
| 97.41837  | 74.85284   | 74.746086 | 53.436714 | 7.6442246  | 7.512378  |
| 72.57385  | 47.40894   | 4.9999995 | 24.691103 | 6.6422896  | 7.4532213 |
| 4.9999995 | 9.385622   | 5.350071  | 7.6112733 | 4.794468   | 3.4709065 |
| 314.41556 | 206.72716  | 300.82556 | 223.15558 | 9.223209   | 9.675767  |
| 13.368468 | 4.9999995  | 4.9999995 | 6.927028  | 5.194806   | 4.5190167 |
| 13.368468 | 4.9999995  | 4.9999995 | 6.927028  | 5.194806   | 4.5190167 |
| 13.368468 | 4.9999995  | 4.9999995 | 6.927028  | 5.194806   | 4.5190167 |
| 52.80799  | 34.06612   | 31.982195 | 23.252935 | 6.2545114  | 6.684485  |
| 165.89948 | 180.6895   | 182.5149  | 143.15784 | 9.264433   | 9.038364  |
| 276.47345 | 174.9783   | 233.00618 | 162.64148 | 8.766468   | 8.641002  |
| 12.192518 | 8.743812   | 7.0638566 | 6.2507763 | 4.3874264  | 4.88963   |
| 12.192518 | 8.743812   | 7.0638566 | 6.2507763 | 4.3874264  | 4.88963   |
| 12.192518 | 8.743812   | 7.0638566 | 6.2507763 | 4.3874264  | 4.88963   |
| 12.192518 | 8.743812   | 7.0638566 | 6.2507763 | 4.3874264  | 4.88963   |
| 12.192518 | 8.743812   | 7.0638566 | 6.2507763 | 4.3874264  | 4.88963   |
| 80.9807   | 28.778435  | 61.705578 | 36.475388 | 7.6971235  | 7.915071  |
| 80.9807   | 28.778435  | 61.705578 | 36.475388 | 7.6971235  | 7.915071  |
| 80.9807   | 28.778435  | 61.705578 | 36.475388 | 7.6971235  | 7.915071  |
| 80.9807   | 28.778435  | 61.705578 | 36.475388 | 7.6971235  | 7.915071  |
| 4.9999995 | 4.9999995  | 8.471814  | 4.9999995 | 4.8059683  | 4.548462  |
| 4.9999995 | 10.03124   | 4.9999995 | 7.370968  | 6.419948   | 7.623695  |
| 4.9999995 | 37.989017  | 4.9999995 | 16.59032  | 3.7792497  | 3.3330002 |
| 153.74536 | 37.399002  | 116.37451 | 66.10144  | 8.371012   | 8.86678   |
| 6.7106147 | 5.712141   | 14.61625  | 9.073176  | 4.95292    | 5.711576  |
| 6.7106147 | 5.712141   | 14.61625  | 9.073176  | 4.95292    | 5.711576  |
| 6.7106147 | 5.712141   | 14.61625  | 9.073176  | 4.95292    | 5.711576  |
| 266.62585 | 131.11887  | 358.83453 | 194.15341 | 9.091652   | 8.628077  |
| 24.954641 | 8.642542   | 29.946371 | 25.33554  | 6.726115   | 6.3167596 |
| 117.8438  | 127.164734 | 117.46209 | 105.83572 | 8.662384   | 9.477921  |
| 118.86003 | 339.65753  | 745.8348  | 450.2028  | 11.468857  | 11.669477 |
| 47.126476 | 82.49367   | 47.446323 | 53.425873 | 7.252865   | 7.263584  |
| 47.126476 | 82.49367   | 47.446323 | 53.425873 | 7.252865   | 7.263584  |
| 62.6506   | 46.19835   | 48.257282 | 39.616096 | 7.4756866  | 6.7326884 |
| 62.6506   | 46.19835   | 48.257282 | 39.616096 | 7.4756866  | 6.7326884 |
| 62.6506   | 46.19835   | 48.257282 | 39.616096 | 7.4756866  | 6.7326884 |
| 68.39247  | 4.9999995  | 11.58622  | 7.8131623 | 5.877446   | 6.3958316 |
| 102.33332 | 75.64192   | 89.92814  | 68.77627  | 9.021271   | 9.454793  |
| 236.56224 | 218.51988  | 373.87607 | 257.1678  | 9.157509   | 9.624605  |
| 178.49126 | 93.17479   | 81.69885  | 69.356064 | 8.218085   | 8.384856  |
| 178.49126 | 93.17479   | 81.69885  | 69.356064 | 8.218085   | 8.384856  |
| 268.19077 | 96.540085  | 146.6946  | 98.81254  | 10.1589775 | 9.870806  |

|           |           |           |           |           |           |
|-----------|-----------|-----------|-----------|-----------|-----------|
| 4.9122868 | 4.9716067 | 4.3585105 | 4.393959  | 2.601026  | 2.4279919 |
| 5.8032274 | 6.2079754 | 5.44986   | 5.584952  | 4.8992343 | 5.6595592 |
| 4.3463387 | 3.9709456 | 3.6206162 | 3.7405472 | 2.3467326 | 2.4279919 |
| 5.206724  | 4.9966507 | 5.39038   | 5.524594  | 4.1742296 | 3.615275  |
| 10.967577 | 9.429362  | 6.918059  | 8.491252  | 7.243159  | 6.988554  |
| 7.0648217 | 6.821927  | 6.6765327 | 6.5840926 | 6.4416    | 5.3905077 |
| 8.625051  | 9.947439  | 8.8779745 | 9.29999   | 7.5152416 | 7.6636105 |
| 8.625051  | 9.947439  | 8.8779745 | 9.29999   | 7.5152416 | 7.6636105 |
| 9.12156   | 9.490204  | 8.722115  | 9.073381  | 7.483323  | 7.5978823 |
| 9.12156   | 9.490204  | 8.722115  | 9.073381  | 7.483323  | 7.5978823 |
| 7.747354  | 8.234578  | 7.6454926 | 7.9829063 | 6.0879364 | 5.776781  |
| 8.058647  | 7.8885503 | 7.3008018 | 7.5286636 | 6.9598274 | 7.811996  |
| 5.448364  | 5.4658356 | 5.4842143 | 5.516959  | 4.0965295 | 3.626508  |
| 6.416896  | 4.7061467 | 5.7644024 | 5.389193  | 4.3331227 | 5.10717   |
| 5.997186  | 6.4153295 | 6.54012   | 6.73018   | 5.0348816 | 5.787242  |
| 5.997186  | 6.4153295 | 6.54012   | 6.73018   | 5.0348816 | 5.787242  |
| 9.542218  | 9.755116  | 10.934139 | 10.538493 | 8.513052  | 8.94312   |
| 10.688578 | 12.228256 | 11.777889 | 12.125295 | 10.696188 | 10.398167 |
| 7.9880214 | 7.575602  | 7.1766357 | 7.262645  | 6.2485695 | 6.056382  |
| 7.9880214 | 7.575602  | 7.1766357 | 7.262645  | 6.2485695 | 6.056382  |
| 7.9880214 | 7.575602  | 7.1766357 | 7.262645  | 6.2485695 | 6.056382  |
| 7.9880214 | 7.575602  | 7.1766357 | 7.262645  | 6.2485695 | 6.056382  |
| 5.4006066 | 10.947975 | 3.8833416 | 9.556169  | 5.573363  | 4.4593306 |
| 5.514719  | 3.324197  | 4.1212645 | 3.6688137 | 3.3773136 | 2.4279919 |
| 8.571576  | 9.0523205 | 9.634483  | 9.338832  | 7.926648  | 7.720291  |
| 3.6470206 | 4.1457596 | 3.713131  | 3.7565346 | 2.3467326 | 2.4279919 |
| 3.6470206 | 4.1457596 | 3.713131  | 3.7565346 | 2.3467326 | 2.4279919 |
| 3.6470206 | 4.1457596 | 3.713131  | 3.7565346 | 2.3467326 | 2.4279919 |
| 5.9951396 | 5.735118  | 6.274384  | 6.037009  | 4.987628  | 4.7229214 |
| 9.588116  | 9.20575   | 9.6579075 | 9.388596  | 7.886544  | 8.747334  |
| 9.023521  | 9.325902  | 8.236465  | 8.784643  | 7.6957006 | 7.2025995 |
| 4.0059657 | 4.6258793 | 3.7291548 | 3.8236775 | 2.9379373 | 2.4279919 |
| 4.0059657 | 4.6258793 | 3.7291548 | 3.8236775 | 2.9379373 | 2.4279919 |
| 4.0059657 | 4.6258793 | 3.7291548 | 3.8236775 | 2.9379373 | 2.4279919 |
| 4.0059657 | 4.6258793 | 3.7291548 | 3.8236775 | 2.9379373 | 2.4279919 |
| 4.0059657 | 4.6258793 | 3.7291548 | 3.8236775 | 2.9379373 | 2.4279919 |
| 7.62342   | 7.1251006 | 7.1987567 | 7.2215233 | 5.895338  | 5.326412  |
| 7.62342   | 7.1251006 | 7.1987567 | 7.2215233 | 5.895338  | 5.326412  |
| 7.62342   | 7.1251006 | 7.1987567 | 7.2215233 | 5.895338  | 5.326412  |
| 7.62342   | 7.1251006 | 7.1987567 | 7.2215233 | 5.895338  | 5.326412  |
| 5.2766347 | 3.9930918 | 3.984094  | 4.235627  | 2.750073  | 2.4279919 |
| 3.025926  | 3.2920148 | 4.408493  | 4.442233  | 4.659763  | 5.296691  |
| 4.651634  | 4.9796686 | 4.642429  | 4.843414  | 2.3467326 | 2.4279919 |
| 7.460045  | 8.384178  | 9.736995  | 9.3233385 | 6.787743  | 5.993319  |
| 3.93022   | 4.307352  | 5.082461  | 5.02265   | 2.787523  | 3.1485484 |
| 3.93022   | 4.307352  | 5.082461  | 5.02265   | 2.787523  | 3.1485484 |
| 3.93022   | 4.307352  | 5.082461  | 5.02265   | 2.787523  | 3.1485484 |
| 9.643356  | 8.802414  | 9.18377   | 9.052686  | 7.8110924 | 7.6596923 |
| 7.0147543 | 5.83261   | 5.3056035 | 5.4729824 | 4.383585  | 2.4279919 |
| 7.3606114 | 8.568567  | 7.8684397 | 8.129433  | 7.272711  | 8.181859  |
| 11.206703 | 11.577353 | 10.601215 | 11.424923 | 8.399102  | 8.989393  |
| 7.544601  | 8.814109  | 7.367026  | 8.300599  | 5.923726  | 6.357631  |
| 7.544601  | 8.814109  | 7.367026  | 8.300599  | 5.923726  | 6.357631  |
| 8.14843   | 7.394985  | 6.248054  | 6.6086392 | 5.7760777 | 6.1684523 |
| 8.14843   | 7.394985  | 6.248054  | 6.6086392 | 5.7760777 | 6.1684523 |
| 8.14843   | 7.394985  | 6.248054  | 6.6086392 | 5.7760777 | 6.1684523 |
| 5.697238  | 6.6525836 | 5.294198  | 5.920142  | 5.4566307 | 3.531699  |
| 8.779269  | 8.761826  | 8.046786  | 8.461447  | 6.8743606 | 7.4888945 |
| 8.655772  | 10.0853   | 9.265468  | 9.433519  | 8.198083  | 8.601015  |
| 8.210738  | 8.449653  | 7.8697543 | 8.123365  | 7.255137  | 7.4352374 |
| 8.210738  | 8.449653  | 7.8697543 | 8.123365  | 7.255137  | 7.4352374 |
| 10.515139 | 8.05764   | 8.925515  | 8.661674  | 7.750097  | 7.443655  |

|           |           |           |           |
|-----------|-----------|-----------|-----------|
| 2.8275633 | 3.120954  | 2.3618152 | 2.9716313 |
| 4.671764  | 5.173439  | 5.345134  | 4.8237696 |
| 2.350709  | 3.2634592 | 3.2852955 | 3.5526924 |
| 3.6515532 | 3.9508004 | 3.4252677 | 3.374238  |
| 7.6812725 | 5.8466845 | 5.549306  | 5.5644884 |
| 7.2348433 | 5.450528  | 5.914273  | 5.299771  |
| 7.5775166 | 7.583874  | 8.823786  | 8.299586  |
| 7.5775166 | 7.583874  | 8.823786  | 8.299586  |
| 7.7941194 | 8.005218  | 7.958147  | 8.024868  |
| 7.7941194 | 8.005218  | 7.958147  | 8.024868  |
| 6.0902853 | 5.9438987 | 6.785332  | 6.542165  |
| 5.8372808 | 7.5706005 | 6.447755  | 7.052748  |
| 4.391829  | 3.698442  | 4.72583   | 4.1831064 |
| 2.350709  | 3.819745  | 3.627902  | 4.0314417 |
| 4.2618074 | 6.0023475 | 5.5084543 | 5.787242  |
| 4.2618074 | 6.0023475 | 5.5084543 | 5.787242  |
| 8.305659  | 8.331963  | 9.050843  | 8.764882  |
| 11.049557 | 10.247843 | 10.799775 | 10.466114 |
| 6.5665956 | 6.5473337 | 6.4858212 | 6.1719832 |
| 6.5665956 | 6.5473337 | 6.4858212 | 6.1719832 |
| 6.5665956 | 6.5473337 | 6.4858212 | 6.1719832 |
| 6.5665956 | 6.5473337 | 6.4858212 | 6.1719832 |
| 6.155364  | 5.8267007 | 2.3618152 | 4.980672  |
| 2.350709  | 3.3292668 | 2.7627459 | 3.193948  |
| 8.24472   | 8.095094  | 8.479794  | 8.334832  |
| 3.8146052 | 2.3408759 | 2.3618152 | 3.0518618 |
| 3.8146052 | 2.3408759 | 2.3618152 | 3.0518618 |
| 3.8146052 | 2.3408759 | 2.3618152 | 3.0518618 |
| 5.712997  | 5.311313  | 5.27341   | 4.885249  |
| 7.323999  | 7.879078  | 7.7596226 | 7.6531234 |
| 8.057017  | 7.8287354 | 8.118135  | 7.850077  |
| 3.6954606 | 3.227034  | 3.1213126 | 2.9054773 |
| 3.6954606 | 3.227034  | 3.1213126 | 2.9054773 |
| 3.6954606 | 3.227034  | 3.1213126 | 2.9054773 |
| 3.6954606 | 3.227034  | 3.1213126 | 2.9054773 |
| 3.6954606 | 3.227034  | 3.1213126 | 2.9054773 |
| 6.3042245 | 5.054576  | 6.212938  | 5.591996  |
| 6.3042245 | 5.054576  | 6.212938  | 5.591996  |
| 6.3042245 | 5.054576  | 6.212938  | 5.591996  |
| 6.3042245 | 5.054576  | 6.212938  | 5.591996  |
| 2.350709  | 2.3408759 | 3.374424  | 2.352752  |
| 2.350709  | 3.4275374 | 2.3618152 | 3.1483753 |
| 2.350709  | 5.4808626 | 2.3618152 | 4.3756213 |
| 7.212807  | 5.457521  | 7.1151757 | 6.4910727 |
| 2.919931  | 2.6274114 | 4.1421285 | 3.4615943 |
| 2.919931  | 2.6274114 | 4.1421285 | 3.4615943 |
| 2.919931  | 2.6274114 | 4.1421285 | 3.4615943 |
| 8.004561  | 7.402501  | 8.724084  | 8.115315  |
| 4.6663866 | 3.207969  | 5.1810617 | 5.0215173 |
| 6.8427434 | 7.3579674 | 7.126451  | 7.1909933 |
| 6.8531103 | 8.854871  | 9.775311  | 9.3618145 |
| 5.5570536 | 6.6931663 | 5.843215  | 6.1713448 |
| 5.5570536 | 6.6931663 | 5.843215  | 6.1713448 |
| 5.9543104 | 5.787163  | 5.86562   | 5.718027  |
| 5.9543104 | 5.787163  | 5.86562   | 5.718027  |
| 5.9543104 | 5.787163  | 5.86562   | 5.718027  |
| 6.073433  | 2.3408759 | 3.8078172 | 3.2358902 |
| 6.6409817 | 6.5613384 | 6.7432756 | 6.5477853 |
| 7.832697  | 8.180323  | 8.783784  | 8.546425  |
| 7.4307237 | 6.8726234 | 6.607797  | 6.562273  |
| 7.4307237 | 6.8726234 | 6.607797  | 6.562273  |
| 8.013227  | 6.926316  | 7.4249196 | 7.087134  |

|               |             |             |           |    |           |
|---------------|-------------|-------------|-----------|----|-----------|
| ASHGA5P046122 | 0.035157768 | 0.118717479 | 3.9074078 | up | noncoding |
| ASHGA5P043504 | 0.003698442 | 0.038992846 | 2.3718888 | up | noncoding |
| ASHGA5P029970 | 0.021328725 | 0.090021677 | 2.7013902 | up | noncoding |
| ASHGA5P029970 | 0.021328725 | 0.090021677 | 2.7013902 | up | noncoding |
| ASHGA5P031283 | 0.001967009 | 0.029367232 | 2.6990893 | up | noncoding |
| ASHGA5P030926 | 0.000108423 | 0.009526401 | 3.4937056 | up | noncoding |
| ASHGA5P034780 | 0.004072664 | 0.040758638 | 3.9066153 | up | noncoding |
| ASHGA5P017257 | 8.26233E-06 | 0.004010044 | 4.4279784 | up | noncoding |
| ASHGA5P029990 | 0.048387093 | 0.142801738 | 2.3833245 | up | noncoding |
| ASHGA5P025808 | 0.01193286  | 0.066970246 | 2.0440184 | up | noncoding |
| ASHGA5P017497 | 0.000616712 | 0.016837013 | 2.3318803 | up | noncoding |
| ASHGA5P053591 | 0.015561993 | 0.076285362 | 2.8930365 | up | noncoding |
| ASHGA5P044042 | 0.000884634 | 0.020090144 | 4.444959  | up | noncoding |
| ASHGA5P027841 | 0.0111663   | 0.065174842 | 3.0120646 | up | noncoding |
| ASHGA5P057475 | 0.011354167 | 0.065642623 | 2.4252162 | up | noncoding |
| ASHGA5P026144 | 0.002563643 | 0.032817311 | 2.7087193 | up | noncoding |
| ASHGA5P035114 | 0.003059513 | 0.035781836 | 2.9647347 | up | noncoding |
| ASHGA5P035114 | 0.003059513 | 0.035781836 | 2.9647347 | up | noncoding |
| ASHGA5P019112 | 0.001118408 | 0.022608782 | 2.0382746 | up | noncoding |
| ASHGA5P043298 | 0.011569438 | 0.066242493 | 3.7997264 | up | noncoding |
| ASHGA5P040755 | 0.001119796 | 0.022608782 | 2.0992611 | up | noncoding |
| ASHGA5P039623 | 0.007122474 | 0.053286323 | 2.4395819 | up | noncoding |
| ASHGA5P044100 | 0.009073021 | 0.059385427 | 2.5310073 | up | noncoding |
| ASHGA5P039818 | 0.010023256 | 0.062088421 | 2.9846781 | up | noncoding |
| ASHGA5P020826 | 0.002449955 | 0.032178734 | 2.3862461 | up | noncoding |
| ASHGA5P029188 | 0.003666905 | 0.038875464 | 4.8658907 | up | noncoding |
| ASHGA5P029188 | 0.003666905 | 0.038875464 | 4.8658907 | up | noncoding |
| ASHGA5P029188 | 0.003666905 | 0.038875464 | 4.8658907 | up | noncoding |
| ASHGA5P018181 | 0.0221686   | 0.092018296 | 2.0262877 | up | noncoding |
| ASHGA5P041671 | 0.002305849 | 0.031550941 | 2.4462539 | up | noncoding |
| ASHGA5P041671 | 0.002305849 | 0.031550941 | 2.4462539 | up | noncoding |
| ASHGA5P041671 | 0.002305849 | 0.031550941 | 2.4462539 | up | noncoding |
| ASHGA5P017358 | 0.004780397 | 0.043918141 | 2.1125441 | up | noncoding |
| ASHGA5P039455 | 0.00518833  | 0.045795413 | 4.0895781 | up | noncoding |
| ASHGA5P042993 | 0.006256903 | 0.05052414  | 2.2747275 | up | noncoding |
| ASHGA5P042993 | 0.006256903 | 0.05052414  | 2.2747275 | up | noncoding |
| ASHGA5P044369 | 0.000562753 | 0.016101946 | 6.7100431 | up | noncoding |
| ASHGA5P044369 | 0.000562753 | 0.016101946 | 6.7100431 | up | noncoding |
| ASHGA5P055433 | 0.00089529  | 0.020125432 | 3.5277274 | up | noncoding |
| ASHGA5P055433 | 0.00089529  | 0.020125432 | 3.5277274 | up | noncoding |
| ASHGA5P047408 | 0.005288265 | 0.046247034 | 3.0870764 | up | noncoding |
| ASHGA5P057660 | 0.00568276  | 0.047888459 | 4.2115915 | up | noncoding |
| ASHGA5P018706 | 0.009150426 | 0.059552152 | 2.327906  | up | noncoding |
| ASHGA5P022237 | 0.01183526  | 0.066924702 | 2.1456003 | up | noncoding |
| ASHGA5P051277 | 3.77096E-05 | 0.006301164 | 2.6329187 | up | noncoding |
| ASHGA5P047938 | 0.013825567 | 0.07198363  | 4.984185  | up | noncoding |
| ASHGA5P018221 | 0.002909529 | 0.034948668 | 2.0056401 | up | noncoding |
| ASHGA5P018221 | 0.002909529 | 0.034948668 | 2.0056401 | up | noncoding |
| ASHGA5P018221 | 0.002909529 | 0.034948668 | 2.0056401 | up | noncoding |
| ASHGA5P028433 | 0.00019312  | 0.01146874  | 7.1270194 | up | noncoding |
| ASHGA5P017505 | 0.005345941 | 0.046545718 | 2.1724501 | up | noncoding |
| ASHGA5P033101 | 0.000549101 | 0.016081868 | 4.1512591 | up | noncoding |
| ASHGA5P032629 | 0.001015393 | 0.021591454 | 4.042618  | up | noncoding |
| ASHGA5P054755 | 0.004366692 | 0.041920723 | 4.2854242 | up | noncoding |
| ASHGA5P026326 | 0.000199299 | 0.01146874  | 3.2965763 | up | noncoding |
| ASHGA5P046584 | 0.005394932 | 0.046690443 | 3.0307657 | up | noncoding |
| ASHGA5P056182 | 0.034734991 | 0.117910957 | 2.0583952 | up | noncoding |
| ASHGA5P037181 | 5.2942E-06  | 0.003272762 | 3.369726  | up | noncoding |
| ASHGA5P037181 | 5.2942E-06  | 0.003272762 | 3.369726  | up | noncoding |
| ASHGA5P037181 | 5.2942E-06  | 0.003272762 | 3.369726  | up | noncoding |
| ASHGA5P037181 | 5.2942E-06  | 0.003272762 | 3.369726  | up | noncoding |
| ASHGA5P037181 | 5.2942E-06  | 0.003272762 | 3.369726  | up | noncoding |



|                 |               |                     |      |       |   |
|-----------------|---------------|---------------------|------|-------|---|
| ENST00000435789 | RP11-431J24.2 | GENCODE             | 1037 | chrX  | - |
| ENST00000431453 | PMS2CL        | GENCODE             | 792  | chr7  | + |
| ENST00000455788 | RP11-263K19.6 | GENCODE             | 568  | chr1  | - |
| ENST00000455788 | RP11-263K19.6 | GENCODE             | 568  | chr1  | - |
| ENST00000561611 | AC004158.2    | GENCODE             | 2194 | chr16 | - |
| ENST00000574705 | RP11-295D4.1  | GENCODE             | 1949 | chr16 | - |
| TCONS_00003548  | XLOC_001320   | LincRNAs identified | 740  | chr2  | + |
| ENST00000439407 | AC087859.1    | GENCODE             | 576  | chr3  | - |
| TCONS_00016231  | XLOC_007614   | LincRNAs identified | 2264 | chr9  | + |
| NR_038205       | LOC100616530  | RefSeq              | 219  | chr8  | + |
| ENST00000442370 | RP11-107C16.2 | GENCODE             | 536  | chr10 | + |
| ENST00000524335 | RP13-582O9.5  | GENCODE             | 499  | chr8  | - |
| NR_038835       | LOC645249     | RefSeq              | 992  | chr7  | + |
| NR_038920       | LOC100506314  | RefSeq              | 1743 | chr12 | + |
| TCONS_00018162  | XLOC_008454   | LincRNAs identified | 532  | chr10 | + |
| NR_047550       | LOC100506082  | RefSeq              | 463  | chr11 | + |
| ENST00000413452 | DGUOK-AS1     | GENCODE             | 419  | chr2  | - |
| ENST00000413452 | DGUOK-AS1     | GENCODE             | 419  | chr2  | - |
| NR_023353       | EXOSC7        | RefSeq              | 1246 | chr3  | + |
| ENST00000456270 | AC000111.6    | GENCODE             | 376  | chr7  | - |
| ENST00000456826 | RP11-403I13.6 | pseudogene          | 2544 | chr1  | + |
| ENST00000561977 | RP11-308D13.3 | GENCODE             | 1098 | chr4  | - |
| ENST00000521218 | CTA-398F10.2  | GENCODE             | 510  | chr8  | - |
| ENST00000413231 | RP11-389O22.1 | GENCODE             | 377  | chr1  | + |
| ENST00000520422 | RP11-150O12.1 | GENCODE             | 734  | chr8  | - |
| NR_046320       | GPX2          | RefSeq              | 1311 | chr14 | - |
| NR_046320       | GPX2          | RefSeq              | 1311 | chr14 | - |
| NR_046320       | GPX2          | RefSeq              | 1311 | chr14 | - |
| ENST00000450299 | LINC00238     | GENCODE             | 722  | chr14 | + |
| ENST00000566170 | RP1-223E5.4   | GENCODE             | 1045 | chr6  | - |
| ENST00000566170 | RP1-223E5.4   | GENCODE             | 1045 | chr6  | - |
| ENST00000566170 | RP1-223E5.4   | GENCODE             | 1045 | chr6  | - |
| ENST00000440568 | AC034193.5    | GENCODE             | 558  | chr3  | + |
| ENST00000567197 | RP11-44F21.5  | GENCODE             | 571  | chr4  | - |
| ENST00000358772 | NPSR1-AS1     | GENCODE             | 550  | chr7  | - |
| ENST00000358772 | NPSR1-AS1     | GENCODE             | 550  | chr7  | - |
| ENST00000562577 | RP11-219B4.7  | GENCODE             | 487  | chr8  | - |
| ENST00000562577 | RP11-219B4.7  | GENCODE             | 487  | chr8  | - |
| ENST00000435388 | RP4-635E18.6  | GENCODE             | 440  | chr1  | + |
| ENST00000435388 | RP4-635E18.6  | GENCODE             | 440  | chr1  | + |
| ENST00000423283 | RP11-123B3.2  | GENCODE             | 435  | chr10 | + |
| TCONS_00020502  | XLOC_009823   | LincRNAs identified | 285  | chr12 | + |
| ENST00000456633 | RP11-29H23.1  | GENCODE             | 911  | chr1  | + |
| ENST00000553181 | RP11-320M2.1  | GENCODE             | 1737 | chr2  | + |
| ENST00000428858 | TTC28-AS1     | GENCODE             | 565  | chr22 | + |
| ENST00000533002 | CTC-497E21.3  | GENCODE             | 670  | chr11 | - |
| NR_047580       | TKT           | RefSeq              | 2069 | chr3  | - |
| NR_047580       | TKT           | RefSeq              | 2069 | chr3  | - |
| NR_047580       | TKT           | RefSeq              | 2069 | chr3  | - |
| ENST00000449656 | C1QTNF9-AS1   | GENCODE             | 470  | chr13 | - |
| ENST00000442440 | RP3-322G13.5  | GENCODE             | 514  | chr20 | - |
| ENST00000436334 | RP5-1061H20.4 | GENCODE             | 315  | chr1  | - |
| ENST00000532249 | AC005152.2    | GENCODE             | 577  | chr17 | - |
| TCONS_00007987  | XLOC_003455   | LincRNAs identified | 375  | chr4  | + |
| TCONS_00014250  | XLOC_006350   | LincRNAs identified | 867  | chr7  | - |
| ENST00000444482 | RP13-216E22.4 | GENCODE             | 451  | chrX  | + |
| TCONS_00000823  | XLOC_000032   | LincRNAs identified | 624  | chr1  | + |
| NR_045370       | LOC100505815  | RefSeq              | 4760 | chr20 | + |
| NR_045370       | LOC100505815  | RefSeq              | 4760 | chr20 | + |
| NR_045370       | LOC100505815  | RefSeq              | 4760 | chr20 | + |
| NR_045370       | LOC100505815  | RefSeq              | 4760 | chr20 | + |
| NR_045370       | LOC100505815  | RefSeq              | 4760 | chr20 | + |

|           |           |                 |                            |                       |
|-----------|-----------|-----------------|----------------------------|-----------------------|
| 16171342  | 16188992  |                 | ATATACTTGTTGAGGAGGAAGCTGCA | natural antisense     |
| 6777265   | 6786736   |                 | ATTTTCACCCGA1441194        | intergenic            |
| 155180941 | 155183610 |                 | TTGGGAAGTTAGAAATGAGGAAGAC  | natural antisense     |
| 155180941 | 155183610 |                 | TTGGGAAGTTAGAAATGAGGAAGAC  | natural antisense     |
| 72459383  | 72698903  |                 | CGATAGAAGTCGACGTGGCATTGCC  | intergenic            |
| 4385870   | 4387819   |                 | GAAAAAACATACACATCAGCTCCTT  | natural antisense     |
| 2875155   | 2876517   |                 | ACCTACATAATCTGCCTACTATCAG  | intergenic            |
| 8540294   | 8653610   |                 | ATGGTGTGTTGGTGCCAACCCACTT  | intronic antisense    |
| 139505191 | 139508134 |                 | TTTGAGGTCAAGAGTTTGAGACCTT  | intergenic            |
| 96281063  | 96822371  |                 | ATTATGCGGTAA(100616530     | intronic antisense    |
| 124578331 | 124583027 |                 | GTGTGCGCAGGTCTGGCTGACTCTC  | intergenic            |
| 144363239 | 144363835 |                 | CTCTTTTCAGCTCCTTCGGTAGTCAC | intergenic            |
| 156803550 | 156809118 |                 | ATGTGTTTTTGA/645249        | bidirectional         |
| 13132770  | 13137576  |                 | GAATGTAAAGTT(100506314     | intronic antisense    |
| 37668109  | 37669239  |                 | AATTGACTTTGGAAGTGTCTTTGTCC | intergenic            |
| 4208381   | 4223883   |                 | GTAGCTTCTGCTC100506082     | intergenic            |
| 74185142  | 74208488  | ENST00000439192 | CCAAGTCTTACTCAGAGAACAGATC  | natural antisense     |
| 74185142  | 74208488  | ENST00000439192 | CCAAGTCTTACTCAGAGAACAGATC  | natural antisense     |
| 45017740  | 45054158  |                 | TGGCGTCCAGTT(23016         | exon sense-overlappi  |
| 117244844 | 117287469 |                 | CATACTGGAATGGAATTAAGACCCG  | intronic antisense    |
| 149261185 | 149263729 | NM_144963       | GTGGAGTTCACATCCGGCACAACACT | intergenic            |
| 140539289 | 140544386 |                 | TGAGGAATACGGTCGTGTCTGTTAA  | intergenic            |
| 8314418   | 8318847   |                 | AGGTTGAATTCCTCTTGGTGGGGA   | intergenic            |
| 113550875 | 113589677 |                 | ATGCTTCAGACAACCTCTCGAAACT  | intergenic            |
| 37278921  | 37351352  |                 | ATTTTGCCTGACAGGAGACAGAGGC  | intergenic            |
| 65405869  | 65409623  |                 | AACTGCTCAGGG'2877          | exon sense-overlappi  |
| 65405869  | 65409623  |                 | AACTGCTCAGGG'2877          | intronic antisense    |
| 65405869  | 65409623  |                 | AACTGCTCAGGG'2877          | intronic antisense    |
| 66953124  | 66965118  |                 | TTCAGGATCTTAC440184        | intergenic            |
| 13614342  | 13615387  |                 | CAAATGTCTGTGTAGTTTCTGCACT  | natural antisense     |
| 13614342  | 13615387  |                 | CAAATGTCTGTGTAGTTTCTGCACT  | natural antisense     |
| 13614342  | 13615387  |                 | CAAATGTCTGTGTAGTTTCTGCACT  | natural antisense     |
| 10028898  | 10044781  |                 | AACACCATAGCTAATATTAACCTTTC | bidirectional         |
| 76007134  | 76007705  | ENST00000561705 | TATGTGTCTATCTTTCCTGCTGTTCA | intergenic            |
| 34607863  | 34797884  |                 | CTACGTAGACCA'404744        | intronic antisense    |
| 34607863  | 34797884  |                 | CTACGTAGACCA'404744        | intronic antisense    |
| 86084311  | 86089276  |                 | GCCTAAGAAAACGGAATCTAAAAGC  | bidirectional         |
| 86084311  | 86089276  |                 | GCCTAAGAAAACGGAATCTAAAAGC  | bidirectional         |
| 11159731  | 11162157  |                 | GCCCTTAATACAATTCATTCACCC/  | natural antisense     |
| 11159731  | 11162157  |                 | GCCCTTAATACAATTCATTCACCC/  | natural antisense     |
| 50627322  | 50680949  |                 | CCAGAACATCAAAGGACAGTCAAA/  | intronic antisense    |
| 88811914  | 88813084  |                 | ATTCTACAGGTTACCAGTACACACC' | intergenic            |
| 155531832 | 155533437 |                 | CGGCCAGCGGGGGCAGGAGAGGAA   | natural antisense     |
| 10588819  | 10591453  |                 | CAGTAACTAGGTCTGAGGCACAGTC  | bidirectional         |
| 28315459  | 28318075  |                 | ACGCTTTCGGTC284900         | natural antisense     |
| 13022636  | 13030706  |                 | TGGCATGTCATTTGACCCAATGGCT' | bidirectional         |
| 53259652  | 53290130  |                 | AATACTTCGACA/7086          | exon sense-overlappi  |
| 53259652  | 53290130  |                 | AATACTTCGACA/7086          | exon sense-overlappi  |
| 53259652  | 53290130  |                 | AATACTTCGACA/7086          | exon sense-overlappi  |
| 24889862  | 24895736  |                 | TTGTGATTGGAACCACTCTTCAAGG' | natural antisense     |
| 23337230  | 23338642  |                 | TTTCTTGTTGTTCTGGGAATATCTGC | intergenic            |
| 229405112 | 229406775 |                 | CAGAGATCCCTGAAACCTGGACAAC  | bidirectional         |
| 70137526  | 70216859  |                 | AGCGAATGCCTTTTGCCTCTTTGATC | intergenic            |
| 11315541  | 11339069  | TCONS_00008754  | ACAAGGTGGACCTAAAACCTGGGTG/ | intergenic            |
| 7591940   | 7606158   | TCONS_00013689, | 'CAGGAGTGAAGTAAAAGACATGG'  | intergenic            |
| 73168807  | 73169393  |                 | GCCAACTGTACCGTTAGTGATTAGT' | intergenic            |
| 4192616   | 4194185   |                 | TTTTATGTGGGGAAAGCAGCGAGGA  | intergenic            |
| 62507483  | 62512243  |                 | CGAACCACAGAA'100505815     | intron sense-overlapp |
| 62507483  | 62512243  |                 | CGAACCACAGAA'100505815     | intron sense-overlapp |
| 62507483  | 62512243  |                 | CGAACCACAGAA'100505815     | intron sense-overlapp |
| 62507483  | 62512243  |                 | CGAACCACAGAA'100505815     | intron sense-overlapp |
| 62507483  | 62512243  |                 | CGAACCACAGAA'100505815     | intron sense-overlapp |

|                         |             |                        |   |           |           |
|-------------------------|-------------|------------------------|---|-----------|-----------|
| NM_005314               | GRPR        | gastrin-releasing pep  | + | 16141423  | 16171641  |
| NM_002455               | MTX1        | metaxin-1 isoform 1    | + | 155178489 | 155183614 |
| NM_198883               | MTX1        | metaxin-1 isoform 2    | + | 155178489 | 155183624 |
| NM_032575               | GLIS2       | zinc finger protein G  | + | 4382224   | 4389598   |
| NM_014583               | LMCD1       | LIM and cysteine-ric   | + | 8543510   | 8609806   |
| NM_177965               | C8orf37     | protein C8orf37        | - | 96257140  | 96281462  |
| NM_005515               | MNX1        | motor neuron and pa    | - | 156797546 | 156803347 |
| NM_015987               | HEBP1       | heme-binding proteir   | - | 13127798  | 13153243  |
| NM_080916               | DGUOK       | deoxyguanosine kina    | + | 74153952  | 74186088  |
| NM_080918               | DGUOK       | deoxyguanosine kina    | + | 74153952  | 74186088  |
| NM_015004               | EXOSC7      | exosome complex co     | + | 45017740  | 45052962  |
| NM_000492               | CFTR        | cystic fibrosis transm | + | 117120016 | 117308718 |
| AGTTGCCGGCCAACGTGAGGCAG |             |                        |   |           |           |
| NM_002083               | GPX2        | glutathione peroxida   | - | 65405869  | 65409623  |
| NM_001202558            | CHURC1-FNTB | CHURC1-FNTB pro        | + | 65381078  | 65529373  |
| NM_001202559            | CHURC1-FNTB | CHURC1-FNTB pro        | + | 65381078  | 65529373  |
| NM_001193267            | SIRT5       | NAD-dependent prot     | + | 13574760  | 13615390  |
| NM_001242827            | SIRT5       | NAD-dependent prot     | + | 13574760  | 13615390  |
| NM_012241               | SIRT5       | NAD-dependent prot     | + | 13574858  | 13615390  |
| NM_018447               | EMC3        | ER membrane protei     | - | 10005635  | 10028522  |
| NM_207172               | NPSR1       | neuropeptide S recep   | + | 34697896  | 34889590  |
| NM_207173               | NPSR1       | neuropeptide S recep   | + | 34697896  | 34917944  |
| NM_001083588            | E2F5        | transcription factor E | + | 86089618  | 86126753  |
| NM_001951               | E2F5        | transcription factor E | + | 86089618  | 86126753  |
| NM_001001998            | EXOSC10     | exosome component      | - | 11126675  | 11159938  |
| NM_002685               | EXOSC10     | exosome component      | - | 11126675  | 11159938  |
| NM_000124               | ERCC6       | DNA excision repair    | - | 50664490  | 50747147  |
| NM_018489               | ASH1L       | histone-lysine N-met   | - | 155305051 | 155532324 |
| NM_002539               | ODC1        | ornithine decarboxyl:  | - | 10580507  | 10588453  |
| ENST00000415296         | PITPNB      | phosphatidylinositol   | - | 28256183  | 28316122  |
| NM_001080521            | RASSF10     | ras association doma   | + | 13030969  | 13033653  |
| NM_001064               | TKT         | transketolase isoform  | - | 53259652  | 53290130  |
| NM_001135055            | TKT         | transketolase isoform  | - | 53258722  | 53290130  |
| NM_001258028            | TKT         | transketolase isoform  | - | 53259652  | 53290130  |
| NM_178540               | C1QTNF9     | complement C1q and     | + | 24883715  | 24896669  |
| NM_004578               | RAB4A       | ras-related protein R  | + | 229406878 | 229440518 |
| NM_001243891            | TPD52L2     | tumor protein D54 is   | + | 62496580  | 62522898  |
| NM_001243892            | TPD52L2     | tumor protein D54 is   | + | 62496580  | 62522898  |
| NM_001243894            | TPD52L2     | tumor protein D54 is   | + | 62496580  | 62522898  |
| NM_001243895            | TPD52L2     | tumor protein D54 is   | + | 62496580  | 62522898  |
| NM_003288               | TPD52L2     | tumor protein D54 is   | + | 62496580  | 62522898  |

|             |             |           |          |            |           |
|-------------|-------------|-----------|----------|------------|-----------|
| 224.410548  | 18.714125   | 6.469089  | 4.502877 | 405.29977  | 72.511154 |
| 28.193335   | 8.706689    | 4.441243  | 3.195206 | 19.5845    | 14.414917 |
| 35.77559    | 9.695261    | 4.764953  | 3.331251 | 48.44392   | 52.278923 |
| 35.77559    | 9.695261    | 4.764953  | 3.331251 | 48.44392   | 52.278923 |
| 47.819005   | 10.802534   | 5.118787  | 3.686315 | 63.147816  | 84.39003  |
| 494.030928  | 81.195784   | 8.490145  | 6.685387 | 575.66376  | 753.43176 |
| 219.971637  | 36.368158   | 7.245707  | 5.279788 | 282.81372  | 350.2592  |
| 29.820345   | 5.031636    | 4.555215  | 2.408567 | 35.804176  | 33.242344 |
| 656.47146   | 95.767181   | 8.06721   | 6.814235 | 193.93669  | 128.88011 |
| 53.868157   | 17.410876   | 5.365921  | 4.334513 | 78.486084  | 58.000217 |
| 107.297177  | 29.070173   | 6.353357  | 5.131863 | 153.93669  | 110.15648 |
| 55.196152   | 15.626888   | 5.447281  | 3.914696 | 57.562653  | 49.175644 |
| 213.477742  | 32.718718   | 7.354991  | 5.202821 | 254.90956  | 279.6683  |
| 827.466327  | 197.558677  | 9.272053  | 7.6813   | 790.5379   | 1000.6896 |
| 149.383597  | 35.468122   | 6.593824  | 5.31571  | 254.77454  | 300.53537 |
| 141.790966  | 29.827369   | 6.603026  | 5.165415 | 207.00325  | 205.1405  |
| 2194.6436   | 531.094662  | 10.471618 | 8.903715 | 1486.261   | 701.1679  |
| 2194.6436   | 531.094662  | 10.471618 | 8.903715 | 1486.261   | 701.1679  |
| 670.095865  | 194.296562  | 8.985973  | 7.958625 | 723.8433   | 850.3245  |
| 67.280394   | 12.1923     | 5.614003  | 3.688107 | 81.956055  | 62.795864 |
| 166.588952  | 53.385502   | 7.017075  | 5.947193 | 142.99081  | 131.54846 |
| 27.407439   | 8.155098    | 4.415255  | 3.128621 | 22.158855  | 20.553856 |
| 32.167218   | 9.167269    | 4.571472  | 3.23176  | 40.347366  | 42.770107 |
| 57.217832   | 10.29408    | 5.222687  | 3.645112 | 62.234818  | 78.471375 |
| 31.059394   | 9.137509    | 4.622089  | 3.367346 | 28.343227  | 25.32988  |
| 13997.0395  | 1630.301243 | 13.255764 | 10.97306 | 14724.919  | 13145.666 |
| 13997.0395  | 1630.301243 | 13.255764 | 10.97306 | 14724.919  | 13145.666 |
| 13997.0395  | 1630.301243 | 13.255764 | 10.97306 | 14724.919  | 13145.666 |
| 27.081245   | 9.831299    | 4.431519  | 3.41268  | 32.501476  | 32.300827 |
| 272.89448   | 71.977139   | 7.699559  | 6.408985 | 315.32077  | 227.83276 |
| 272.89448   | 71.977139   | 7.699559  | 6.408985 | 315.32077  | 227.83276 |
| 272.89448   | 71.977139   | 7.699559  | 6.408985 | 315.32077  | 227.83276 |
| 94.518496   | 27.114515   | 6.132276  | 5.053295 | 111.812584 | 151.20142 |
| 3248.8624   | 522.104922  | 11.169626 | 9.137674 | 3492.149   | 5194.646  |
| 23.50598    | 7.878123    | 4.225729  | 3.040035 | 29.324146  | 18.94343  |
| 23.50598    | 7.878123    | 4.225729  | 3.040035 | 29.324146  | 18.94343  |
| 378.036297  | 27.330168   | 7.804079  | 5.057757 | 174.90515  | 206.4599  |
| 378.036297  | 27.330168   | 7.804079  | 5.057757 | 174.90515  | 206.4599  |
| 1726.307258 | 250.1405    | 10.154198 | 8.335459 | 2363.0215  | 3303.1235 |
| 1726.307258 | 250.1405    | 10.154198 | 8.335459 | 2363.0215  | 3303.1235 |
| 72.879554   | 14.888315   | 5.71966   | 4.093419 | 87.57748   | 121.00561 |
| 323.559471  | 44.262251   | 7.61567   | 5.541304 | 521.5769   | 719.18976 |
| 560.722028  | 146.58485   | 8.632746  | 7.413713 | 729.57764  | 864.6731  |
| 41.326102   | 11.178664   | 4.858498  | 3.757116 | 58.41564   | 80.71276  |
| 17.017795   | 5           | 3.760142  | 2.363479 | 24.679884  | 15.523139 |
| 77.35575    | 7.502269    | 5.437907  | 3.120549 | 28.01744   | 17.873697 |
| 206.581     | 63.563934   | 7.25806   | 6.253997 | 258.79672  | 305.0099  |
| 206.581     | 63.563934   | 7.25806   | 6.253997 | 258.79672  | 305.0099  |
| 206.581     | 63.563934   | 7.25806   | 6.253997 | 258.79672  | 305.0099  |
| 94.230279   | 7.205509    | 5.680456  | 2.847157 | 40.712482  | 62.62909  |
| 577.15631   | 175.096453  | 8.767541  | 7.648218 | 662.8118   | 724.0333  |
| 30.829333   | 5.652032    | 4.597132  | 2.543583 | 31.747114  | 25.824442 |
| 47.686432   | 8.699577    | 5.208087  | 3.192797 | 61.710922  | 57.20234  |
| 65.826436   | 7.536389    | 5.140655  | 3.041217 | 87.728386  | 156.53189 |
| 52.570843   | 10.369033   | 5.291147  | 3.570179 | 56.058     | 74.9288   |
| 153.887118  | 36.723259   | 6.799021  | 5.199339 | 161.48044  | 191.54488 |
| 22.201429   | 7.543642    | 4.09412   | 3.0526   | 34.916405  | 28.111052 |
| 400.742417  | 72.696413   | 8.184351  | 6.43172  | 430.2499   | 444.7889  |
| 400.742417  | 72.696413   | 8.184351  | 6.43172  | 430.2499   | 444.7889  |
| 400.742417  | 72.696413   | 8.184351  | 6.43172  | 430.2499   | 444.7889  |
| 400.742417  | 72.696413   | 8.184351  | 6.43172  | 430.2499   | 444.7889  |
| 400.742417  | 72.696413   | 8.184351  | 6.43172  | 430.2499   | 444.7889  |

|           |           |           |            |           |           |
|-----------|-----------|-----------|------------|-----------|-----------|
| 724.54034 | 30.744865 | 58.459137 | 54.90802   | 23.631382 | 13.76804  |
| 30.519697 | 36.143982 | 31.052137 | 37.44478   | 8.732702  | 4.9999995 |
| 31.967863 | 23.894554 | 32.00571  | 26.06257   | 7.019572  | 4.9999995 |
| 31.967863 | 23.894554 | 32.00571  | 26.06257   | 7.019572  | 4.9999995 |
| 46.496433 | 28.14678  | 28.68025  | 36.05272   | 11.328181 | 8.632324  |
| 380.38605 | 553.4574  | 265.0424  | 436.2042   | 86.880066 | 80.516235 |
| 141.84186 | 72.17678  | 254.67097 | 218.06729  | 38.605446 | 21.09379  |
| 36.793083 | 25.706215 | 21.05784  | 26.318409  | 4.9999995 | 4.9999995 |
| 188.49463 | 2056.941  | 137.48363 | 1233.0927  | 67.77535  | 43.676197 |
| 45.33292  | 60.362186 | 29.018604 | 52.00893   | 15.171461 | 9.01969   |
| 129.08691 | 79.78407  | 93.87633  | 76.94258   | 35.1331   | 17.97315  |
| 62.473988 | 66.416145 | 40.21097  | 55.337513  | 13.191848 | 4.9999995 |
| 169.21004 | 200.98709 | 166.92786 | 209.1636   | 36.84542  | 13.486149 |
| 545.6623  | 721.4615  | 837.83466 | 1068.612   | 200.24472 | 68.70168  |
| 76.8786   | 58.308987 | 107.84958 | 97.954506  | 43.423595 | 27.747625 |
| 173.66774 | 41.925102 | 112.13123 | 110.877975 | 36.615395 | 40.633877 |
| 2291.343  | 1308.3093 | 3844.5344 | 3536.246   | 244.20398 | 56.83945  |
| 2291.343  | 1308.3093 | 3844.5344 | 3536.246   | 244.20398 | 56.83945  |
| 566.0336  | 622.6642  | 567.41223 | 690.29736  | 169.24208 | 181.805   |
| 102.93639 | 80.46949  | 22.72914  | 52.795425  | 13.17473  | 4.9999995 |
| 188.55557 | 163.3477  | 172.64417 | 200.447    | 61.975872 | 26.063673 |
| 22.402348 | 25.037779 | 38.087116 | 36.20468   | 10.77962  | 4.9999995 |
| 29.254765 | 13.440599 | 36.100594 | 31.089878  | 11.60772  | 4.9999995 |
| 16.87813  | 107.25412 | 19.571672 | 58.89688   | 10.11414  | 9.340063  |
| 24.55762  | 43.958443 | 27.963303 | 36.20389   | 9.6755085 | 6.6506395 |
| 15942.132 | 21402.07  | 5288.157  | 13479.293  | 1107.6469 | 819.63226 |
| 15942.132 | 21402.07  | 5288.157  | 13479.293  | 1107.6469 | 819.63226 |
| 15942.132 | 21402.07  | 5288.157  | 13479.293  | 1107.6469 | 819.63226 |
| 25.96548  | 25.132032 | 22.045582 | 24.542072  | 10.33629  | 4.9999995 |
| 385.59036 | 244.4679  | 199.04575 | 265.10934  | 60.626812 | 37.055874 |
| 385.59036 | 244.4679  | 199.04575 | 265.10934  | 60.626812 | 37.055874 |
| 385.59036 | 244.4679  | 199.04575 | 265.10934  | 60.626812 | 37.055874 |
| 60.865456 | 58.35736  | 86.7783   | 98.095856  | 29.42151  | 30.87654  |
| 1752.7296 | 3040.782  | 2637.6248 | 3375.243   | 357.88083 | 211.05673 |
| 29.257927 | 20.140158 | 22.860964 | 20.509258  | 4.9999995 | 4.9999995 |
| 29.257927 | 20.140158 | 22.860964 | 20.509258  | 4.9999995 | 4.9999995 |
| 150.49329 | 944.1477  | 176.21664 | 615.9951   | 18.234312 | 19.75026  |
| 150.49329 | 944.1477  | 176.21664 | 615.9951   | 18.234312 | 19.75026  |
| 1403.303  | 1494.6562 | 622.51025 | 1171.2291  | 253.09778 | 306.2097  |
| 1403.303  | 1494.6562 | 622.51025 | 1171.2291  | 253.09778 | 306.2097  |
| 30.596952 | 82.89364  | 48.51399  | 66.68965   | 18.967318 | 14.366621 |
| 171.20787 | 90.397705 | 255.54604 | 183.43855  | 50.047432 | 23.991608 |
| 437.5653  | 238.63551 | 628.896   | 464.98462  | 168.68893 | 80.6891   |
| 33.46148  | 29.234293 | 18.081305 | 28.051132  | 10.24387  | 10.23667  |
| 14.177432 | 18.446602 | 13.663301 | 15.616409  | 4.9999995 | 4.9999995 |
| 28.228422 | 184.41072 | 61.52484  | 144.07938  | 5.2988596 | 6.156163  |
| 165.22072 | 112.73953 | 212.0424  | 185.67673  | 85.64107  | 101.18311 |
| 165.22072 | 112.73953 | 212.0424  | 185.67673  | 85.64107  | 101.18311 |
| 165.22072 | 112.73953 | 212.0424  | 185.67673  | 85.64107  | 101.18311 |
| 21.166885 | 37.18969  | 221.32379 | 182.35974  | 4.9999995 | 4.9999995 |
| 540.03107 | 498.45187 | 612.1968  | 425.41302  | 210.39645 | 83.56151  |
| 25.38872  | 40.374405 | 20.589287 | 41.05203   | 4.9999995 | 4.9999995 |
| 54.71765  | 37.107216 | 34.76211  | 40.618355  | 12.39386  | 4.9999995 |
| 27.893738 | 74.78463  | 5.2497497 | 42.77022   | 7.787353  | 14.805231 |
| 32.62762  | 31.37764  | 53.97356  | 66.45944   | 13.96829  | 11.0948   |
| 116.75497 | 61.639576 | 205.43626 | 186.46658  | 50.68316  | 14.206709 |
| 18.23071  | 16.145931 | 17.741674 | 18.0628    | 6.4023476 | 4.9999995 |
| 470.94647 | 512.59265 | 160.49998 | 385.3766   | 82.78152  | 48.545845 |
| 470.94647 | 512.59265 | 160.49998 | 385.3766   | 82.78152  | 48.545845 |
| 470.94647 | 512.59265 | 160.49998 | 385.3766   | 82.78152  | 48.545845 |
| 470.94647 | 512.59265 | 160.49998 | 385.3766   | 82.78152  | 48.545845 |
| 470.94647 | 512.59265 | 160.49998 | 385.3766   | 82.78152  | 48.545845 |

|            |           |           |           |           |           |
|------------|-----------|-----------|-----------|-----------|-----------|
| 23.186682  | 19.014866 | 16.5023   | 16.181479 | 8.20354   | 5.999069  |
| 13.8371105 | 7.4763765 | 11.68075  | 5.5131946 | 3.8323848 | 3.8736084 |
| 8.733802   | 7.636619  | 18.293512 | 11.48806  | 5.1391444 | 5.5713167 |
| 8.733802   | 7.636619  | 18.293512 | 11.48806  | 5.1391444 | 5.5713167 |
| 13.337009  | 9.405043  | 14.165818 | 7.9468293 | 5.5237694 | 6.2035284 |
| 65.983116  | 92.23682  | 84.28048  | 77.277985 | 8.692874  | 9.231252  |
| 82.78959   | 22.979628 | 34.23989  | 18.500603 | 7.6881914 | 8.168598  |
| 5.189821   | 4.9999995 | 4.9999995 | 4.9999995 | 4.699124  | 4.979194  |
| 121.50958  | 161.94904 | 77.18509  | 102.50783 | 7.1485634 | 6.779146  |
| 29.0317    | 16.280909 | 17.153448 | 17.808048 | 5.8398933 | 5.7017303 |
| 40.129772  | 25.05659  | 26.481054 | 29.647375 | 6.8089333 | 6.563367  |
| 27.599844  | 8.667647  | 24.526543 | 14.775448 | 5.3850904 | 5.4887266 |
| 53.417416  | 21.944452 | 42.633896 | 27.984974 | 7.5375977 | 7.8594213 |
| 355.86032  | 67.23519  | 332.20166 | 161.10849 | 9.166004  | 9.620287  |
| 60.97862   | 18.341656 | 42.314606 | 20.00263  | 7.5367417 | 7.95938   |
| 33.281425  | 21.406622 | 20.487957 | 26.538937 | 7.2395864 | 7.4290247 |
| 401.4107   | 483.35544 | 1333.1372 | 667.6212  | 10.069458 | 9.130616  |
| 401.4107   | 483.35544 | 1333.1372 | 667.6212  | 10.069458 | 9.130616  |
| 156.5175   | 250.11972 | 212.49332 | 195.60175 | 9.031186  | 9.393203  |
| 13.054968  | 9.3730955 | 15.53252  | 17.018486 | 5.904527  | 5.8058276 |
| 93.096016  | 36.61392  | 57.881523 | 44.68201  | 6.708371  | 6.8058624 |
| 11.94208   | 7.0806704 | 8.864149  | 5.26407   | 4.006923  | 4.3332253 |
| 8.380477   | 4.9999995 | 16.788248 | 8.22717   | 4.871534  | 5.3066463 |
| 7.4501367  | 9.847801  | 11.311388 | 13.700951 | 5.5040965 | 6.1057725 |
| 7.1660905  | 14.509058 | 4.9999995 | 11.82376  | 4.3731055 | 4.614922  |
| 1367.6798  | 1821.126  | 2703.9597 | 1961.7628 | 13.384729 | 13.243889 |
| 1367.6798  | 1821.126  | 2703.9597 | 1961.7628 | 13.384729 | 13.243889 |
| 1367.6798  | 1821.126  | 2703.9597 | 1961.7628 | 13.384729 | 13.243889 |
| 11.76082   | 9.244757  | 13.53467  | 9.111257  | 4.562217  | 4.9392123 |
| 98.18723   | 52.431618 | 112.2595  | 71.3018   | 7.8457923 | 7.574256  |
| 98.18723   | 52.431618 | 112.2595  | 71.3018   | 7.8457923 | 7.574256  |
| 98.18723   | 52.431618 | 112.2595  | 71.3018   | 7.8457923 | 7.574256  |
| 18.72677   | 35.30036  | 19.11723  | 29.244682 | 6.356434  | 7.0055604 |
| 496.8186   | 240.38507 | 1252.6914 | 573.7969  | 11.295942 | 11.877131 |
| 9.92397    | 6.3605723 | 12.52037  | 8.463828  | 4.4180727 | 4.2303934 |
| 9.92397    | 6.3605723 | 12.52037  | 8.463828  | 4.4180727 | 4.2303934 |
| 31.554806  | 33.993057 | 27.134193 | 33.314377 | 6.997226  | 7.4355407 |
| 31.554806  | 33.993057 | 27.134193 | 33.314377 | 6.997226  | 7.4355407 |
| 207.62425  | 287.76285 | 219.87837 | 226.27005 | 10.729164 | 11.268146 |
| 207.62425  | 287.76285 | 219.87837 | 226.27005 | 10.729164 | 11.268146 |
| 24.702229  | 12.72026  | 8.018811  | 10.554651 | 5.999274  | 6.6925745 |
| 101.83389  | 19.07109  | 40.83613  | 29.793356 | 8.542692  | 9.167778  |
| 281.0226   | 111.66202 | 141.18755 | 96.2589   | 9.0463    | 9.421204  |
| 12.82093   | 10.663641 | 8.137023  | 14.969851 | 5.4061484 | 6.1405816 |
| 4.9999995  | 4.9999995 | 4.9999995 | 4.9999995 | 4.167419  | 3.9763172 |
| 9.862616   | 4.9999995 | 10.35478  | 8.341195  | 4.3544574 | 4.1581364 |
| 47.13562   | 51.546883 | 52.2708   | 43.60612  | 7.559444  | 7.9811974 |
| 47.13562   | 51.546883 | 52.2708   | 43.60612  | 7.559444  | 7.9811974 |
| 47.13562   | 51.546883 | 52.2708   | 43.60612  | 7.559444  | 7.9811974 |
| 4.9999995  | 4.9999995 | 13.149168 | 10.08389  | 4.884555  | 5.801633  |
| 332.79996  | 102.77923 | 190.86716 | 130.17441 | 8.899571  | 9.178617  |
| 4.9999995  | 4.9999995 | 8.912193  | 4.9999995 | 4.529036  | 4.6421456 |
| 11.18578   | 6.565073  | 12.0226   | 5.0301485 | 5.491579  | 5.68291   |
| 4.9999995  | 6.476231  | 4.9999995 | 6.1495204 | 6.0032883 | 7.0526505 |
| 9.915331   | 4.9999995 | 14.312997 | 7.9227786 | 5.345576  | 6.040837  |
| 72.56951   | 13.611561 | 47.962173 | 21.306438 | 6.878362  | 7.33761   |
| 9.170167   | 10.94785  | 6.5098867 | 7.2315984 | 4.6652417 | 4.75725   |
| 113.574196 | 95.654915 | 43.03704  | 52.584965 | 8.28749   | 8.484675  |
| 113.574196 | 95.654915 | 43.03704  | 52.584965 | 8.28749   | 8.484675  |
| 113.574196 | 95.654915 | 43.03704  | 52.584965 | 8.28749   | 8.484675  |
| 113.574196 | 95.654915 | 43.03704  | 52.584965 | 8.28749   | 8.484675  |
| 113.574196 | 95.654915 | 43.03704  | 52.584965 | 8.28749   | 8.484675  |

|           |            |           |            |           |           |
|-----------|------------|-----------|------------|-----------|-----------|
| 9.149382  | 4.494861   | 5.6811395 | 5.2865415  | 4.8035316 | 4.5876474 |
| 4.6234026 | 4.7426004  | 4.815528  | 4.759932   | 3.3368583 | 2.4279919 |
| 4.686373  | 4.0907717  | 4.855031  | 4.247084   | 3.0058832 | 2.4279919 |
| 4.686373  | 4.0907717  | 4.855031  | 4.247084   | 3.0058832 | 2.4279919 |
| 5.219002  | 4.3507433  | 4.708958  | 4.7067227  | 3.7321603 | 3.8833416 |
| 8.22118   | 8.78719    | 7.807702  | 8.200672   | 6.669672  | 7.1818714 |
| 6.825223  | 5.8098702  | 7.7514086 | 7.2309523  | 5.5034294 | 5.230659  |
| 4.8874345 | 4.2133555  | 4.29086   | 4.261322   | 2.3467326 | 2.4279919 |
| 7.2356753 | 10.6726    | 6.880534  | 9.686741   | 6.3180237 | 6.294335  |
| 5.1819935 | 5.5380483  | 4.720988  | 5.2128735  | 4.1586657 | 3.948143  |
| 6.6906977 | 5.9592047  | 6.34217   | 5.75577    | 5.369686  | 4.9888506 |
| 5.657337  | 5.683706   | 5.170342  | 5.298483   | 3.9486513 | 2.4279919 |
| 7.0719175 | 7.334071   | 7.1552453 | 7.1716957  | 5.4394574 | 4.555777  |
| 8.736874  | 9.186425   | 9.448238  | 9.47449    | 7.8915606 | 6.952528  |
| 5.9501505 | 5.4848337  | 6.5383945 | 6.0934415  | 5.6738076 | 5.629012  |
| 7.1107492 | 4.975722   | 6.5932446 | 6.2698274  | 5.429651  | 6.1886063 |
| 10.820469 | 10.03167   | 11.601778 | 11.1757145 | 8.190673  | 6.6834564 |
| 10.820469 | 10.03167   | 11.601778 | 11.1757145 | 8.190673  | 6.6834564 |
| 8.781971  | 8.96433    | 8.888732  | 8.856418   | 7.647561  | 8.3561    |
| 6.370512  | 5.971423   | 4.398897  | 5.23283    | 3.946541  | 2.4279919 |
| 7.236043  | 7.0294094  | 7.2034097 | 7.1193533  | 6.189556  | 5.5376835 |
| 4.1722894 | 4.168667   | 5.097692  | 4.7127304  | 3.655815  | 2.4279919 |
| 4.5630417 | 3.1595688  | 5.0227356 | 4.505304   | 3.7659097 | 2.4279919 |
| 3.7596726 | 6.3968415  | 4.1935434 | 5.376197   | 3.5624294 | 3.999057  |
| 4.308036  | 5.047921   | 4.67599   | 4.712561   | 3.4965892 | 3.4913578 |
| 13.67262  | 14.0679035 | 12.07122  | 13.094224  | 10.406976 | 10.538916 |
| 13.67262  | 14.0679035 | 12.07122  | 13.094224  | 10.406976 | 10.538916 |
| 13.67262  | 14.0679035 | 12.07122  | 13.094224  | 10.406976 | 10.538916 |
| 4.3889117 | 4.1755342  | 4.358796  | 4.164445   | 3.597268  | 2.4279919 |
| 8.240637  | 7.629021   | 7.4012246 | 7.506423   | 6.1569686 | 6.0584326 |
| 8.240637  | 7.629021   | 7.4012246 | 7.506423   | 6.1569686 | 6.0584326 |
| 8.240637  | 7.629021   | 7.4012246 | 7.506423   | 6.1569686 | 6.0584326 |
| 5.6189127 | 5.48584    | 6.231531  | 6.0953784  | 5.1105514 | 5.786395  |
| 10.415147 | 11.236628  | 11.088171 | 11.104737  | 8.745834  | 8.581947  |
| 4.563217  | 3.8130364  | 4.406117  | 3.9235346  | 2.3467326 | 2.4279919 |
| 4.563217  | 3.8130364  | 4.406117  | 3.9235346  | 2.3467326 | 2.4279919 |
| 6.9028945 | 9.563779   | 7.236231  | 8.688803   | 4.423615  | 5.132658  |
| 6.9028945 | 9.563779   | 7.236231  | 8.688803   | 4.423615  | 5.132658  |
| 10.083912 | 10.225321  | 9.014239  | 9.604408   | 8.242432  | 9.11972   |
| 10.083912 | 10.225321  | 9.014239  | 9.604408   | 8.242432  | 9.11972   |
| 4.6277194 | 6.018274   | 5.4287705 | 5.551348   | 4.4813766 | 4.656107  |
| 7.089847  | 6.145237   | 7.75637   | 6.992095   | 5.881146  | 5.417628  |
| 8.424522  | 7.5904217  | 9.029845  | 8.2841835  | 7.6422405 | 7.1871147 |
| 4.751691  | 4.412583   | 4.086128  | 4.3538537  | 3.5824375 | 4.1390724 |
| 3.5001023 | 3.6697216  | 3.702781  | 3.5445132  | 2.3467326 | 2.4279919 |
| 4.5099397 | 7.2052975  | 5.751811  | 6.6478004  | 2.6156101 | 3.3722532 |
| 7.0358076 | 6.4759145  | 7.486373  | 7.0096207  | 6.6484303 | 7.5114684 |
| 7.0358076 | 6.4759145  | 7.486373  | 7.0096207  | 6.6484303 | 7.5114684 |
| 7.0358076 | 6.4759145  | 7.486373  | 7.0096207  | 6.6484303 | 7.5114684 |
| 4.083895  | 4.7846975  | 7.543465  | 6.984489   | 2.3467326 | 2.4279919 |
| 8.721822  | 8.648746   | 8.995454  | 8.1610365  | 7.961089  | 7.238552  |
| 4.353895  | 4.9162817  | 4.26018   | 4.8812566  | 2.3467326 | 2.4279919 |
| 5.459435  | 4.781448   | 4.9656973 | 4.8674526  | 3.8606162 | 2.4279919 |
| 4.493106  | 5.86562    | 2.4909728 | 4.9382896  | 3.1578577 | 4.698577  |
| 4.7175193 | 4.526578   | 5.5708313 | 5.5455427  | 4.0298715 | 4.2634883 |
| 6.5487666 | 5.569736   | 7.4434056 | 7.0162473  | 5.900284  | 4.639372  |
| 3.8692296 | 3.458236   | 4.060231  | 3.7545311  | 2.876869  | 2.4279919 |
| 8.530447  | 8.683948   | 7.101765  | 8.01778    | 6.5971103 | 6.4474926 |
| 8.530447  | 8.683948   | 7.101765  | 8.01778    | 6.5971103 | 6.4474926 |
| 8.530447  | 8.683948   | 7.101765  | 8.01778    | 6.5971103 | 6.4474926 |
| 8.530447  | 8.683948   | 7.101765  | 8.01778    | 6.5971103 | 6.4474926 |
| 8.530447  | 8.683948   | 7.101765  | 8.01778    | 6.5971103 | 6.4474926 |

|           |           |           |           |
|-----------|-----------|-----------|-----------|
| 4.5665607 | 4.401739  | 4.320482  | 4.3373013 |
| 3.8642788 | 2.9922    | 3.821414  | 2.728495  |
| 3.249674  | 3.022371  | 4.4637537 | 3.8178346 |
| 3.249674  | 3.022371  | 4.4637537 | 3.8178346 |
| 3.8114226 | 3.3315463 | 4.0954337 | 3.2639832 |
| 6.0228376 | 6.858911  | 6.652111  | 6.7269187 |
| 6.3390436 | 4.699809  | 5.3725133 | 4.533274  |
| 2.6212332 | 2.3408759 | 2.3618152 | 2.352752  |
| 6.88399   | 7.71244   | 6.5330515 | 7.143567  |
| 4.880762  | 4.16768   | 4.372303  | 4.479524  |
| 5.324855  | 4.8353558 | 4.995413  | 5.27702   |
| 4.807457  | 3.214057  | 4.887112  | 4.2029085 |
| 5.7305045 | 4.623012  | 5.686862  | 5.181315  |
| 8.420762  | 6.37772   | 8.61003   | 7.835201  |
| 5.9159765 | 4.3450875 | 5.6756496 | 4.6547284 |
| 5.069063  | 4.5872583 | 4.6223826 | 5.0955276 |
| 8.604717  | 9.362572  | 10.638556 | 9.942313  |
| 8.604717  | 9.362572  | 10.638556 | 9.942313  |
| 7.240632  | 8.393701  | 7.9854956 | 8.12826   |
| 3.7850182 | 3.3268895 | 4.2288575 | 4.4133453 |
| 6.5059156 | 5.425444  | 6.119405  | 5.905155  |
| 3.6659305 | 2.9180255 | 3.4354823 | 2.6684783 |
| 3.1975226 | 2.3408759 | 4.3444376 | 3.3138227 |
| 3.0457366 | 3.4000354 | 3.7736626 | 4.0897503 |
| 2.9974213 | 3.994142  | 2.3618152 | 3.862753  |
| 10.360314 | 11.337718 | 11.654014 | 11.540424 |
| 10.360314 | 11.337718 | 11.654014 | 11.540424 |
| 10.360314 | 11.337718 | 11.654014 | 11.540424 |
| 3.6472712 | 3.3047054 | 4.0308647 | 3.4679809 |
| 6.57789   | 5.989274  | 7.065678  | 6.6056657 |
| 6.57789   | 5.989274  | 7.065678  | 6.6056657 |
| 6.57789   | 5.989274  | 7.065678  | 6.6056657 |
| 4.2763743 | 5.3719535 | 4.5226064 | 5.2518873 |
| 8.911175  | 8.331337  | 10.546904 | 9.708847  |
| 3.416931  | 2.7713077 | 3.9213226 | 3.355923  |
| 3.416931  | 2.7713077 | 3.9213226 | 3.355923  |
| 4.9949074 | 5.308905  | 5.0341306 | 5.452326  |
| 4.9949074 | 5.308905  | 5.0341306 | 5.452326  |
| 7.6490374 | 8.612217  | 8.034049  | 8.3553    |
| 7.6490374 | 8.612217  | 8.034049  | 8.3553    |
| 4.6500263 | 3.7856636 | 3.2971907 | 3.690149  |
| 6.633363  | 4.406572  | 5.624324  | 5.284793  |
| 8.079927  | 7.149965  | 7.378119  | 7.044913  |
| 3.7612078 | 3.5220854 | 3.3164263 | 4.2214684 |
| 2.350709  | 2.3408759 | 2.3618152 | 2.352752  |
| 3.4086986 | 2.3408759 | 3.6539404 | 3.3319185 |
| 5.557356  | 5.9611406 | 5.9781337 | 5.8674517 |
| 5.557356  | 5.9611406 | 5.9781337 | 5.8674517 |
| 5.557356  | 5.9611406 | 5.9781337 | 5.8674517 |
| 2.350709  | 2.3408759 | 3.992458  | 3.624174  |
| 8.32407   | 7.0281167 | 7.824687  | 7.5127935 |
| 2.350709  | 2.3408759 | 3.4424396 | 2.352752  |
| 3.5794473 | 2.8148434 | 3.8645585 | 2.6093252 |
| 2.350709  | 2.7978566 | 2.3618152 | 2.8804836 |
| 3.4159043 | 2.3408759 | 4.1116395 | 3.259294  |
| 6.1551523 | 3.8901327 | 5.856945  | 4.7541475 |
| 3.3167026 | 3.5627506 | 3.012346  | 3.1189392 |
| 6.7897825 | 6.9109945 | 5.699424  | 6.1455135 |
| 6.7897825 | 6.9109945 | 5.699424  | 6.1455135 |
| 6.7897825 | 6.9109945 | 5.699424  | 6.1455135 |
| 6.7897825 | 6.9109945 | 5.699424  | 6.1455135 |
| 6.7897825 | 6.9109945 | 5.699424  | 6.1455135 |



|               |             |             |            |    |           |
|---------------|-------------|-------------|------------|----|-----------|
| ASHGA5P037181 | 5.2942E-06  | 0.003272762 | 3.369726   | up | noncoding |
| ASHGA5P037181 | 5.2942E-06  | 0.003272762 | 3.369726   | up | noncoding |
| ASHGA5P037181 | 5.2942E-06  | 0.003272762 | 3.369726   | up | noncoding |
| ASHGA5P037181 | 5.2942E-06  | 0.003272762 | 3.369726   | up | noncoding |
| ASHGA5P037181 | 5.2942E-06  | 0.003272762 | 3.369726   | up | noncoding |
| ASHGA5P047821 | 0.002357298 | 0.031728208 | 2.0297971  | up | noncoding |
| ASHGA5P050700 | 0.00188882  | 0.029138666 | 3.2824478  | up | noncoding |
| ASHGA5P050700 | 0.00188882  | 0.029138666 | 3.2824478  | up | noncoding |
| ASHGA5P053101 | 0.006699177 | 0.051962277 | 2.2161077  | up | noncoding |
| ASHGA5P041099 | 0.003774432 | 0.039427161 | 5.4719032  | up | noncoding |
| ASHGA5P020987 | 0.02992857  | 0.108408349 | 3.5753139  | up | noncoding |
| ASHGA5P032911 | 0.000289884 | 0.012512734 | 2.4743176  | up | noncoding |
| ASHGA5P056005 | 0.022418518 | 0.092633596 | 12.5250546 | up | noncoding |
| ASHGA5P000309 | 0.002596463 | 0.032877969 | 2.4705243  | up | noncoding |
| ASHGA5P015365 | 0.04319768  | 0.133282412 | 3.3486109  | up | noncoding |
| ASHGA5P015365 | 0.04319768  | 0.133282412 | 3.3486109  | up | noncoding |
| ASHGA5P042645 | 0.005419142 | 0.04682972  | 3.3427323  | up | noncoding |
| ASHGA5P042645 | 0.005419142 | 0.04682972  | 3.3427323  | up | noncoding |
| ASHGA5P042645 | 0.005419142 | 0.04682972  | 3.3427323  | up | noncoding |
| ASHGA5P026575 | 0.023501024 | 0.094945968 | 3.8754837  | up | noncoding |
| ASHGA5P026575 | 0.023501024 | 0.094945968 | 3.8754837  | up | noncoding |
| ASHGA5P050525 | 0.001161602 | 0.022899969 | 3.0924537  | up | noncoding |
| ASHGA5P050525 | 0.001161602 | 0.022899969 | 3.0924537  | up | noncoding |
| ASHGA5P047598 | 8.45255E-05 | 0.008738697 | 5.2341979  | up | noncoding |
| ASHGA5P045003 | 0.013882292 | 0.072158735 | 2.2376496  | up | noncoding |
| ASHGA5P050965 | 0.015357585 | 0.075812413 | 4.8143969  | up | noncoding |
| ASHGA5P026953 | 0.018275781 | 0.082058492 | 2.316815   | up | noncoding |
| ASHGA5P029372 | 0.033607852 | 0.115626776 | 2.0650459  | up | noncoding |
| ASHGA5P044727 | 0.040453961 | 0.128716472 | 2.4585731  | up | noncoding |
| ASHGA5P044727 | 0.040453961 | 0.128716472 | 2.4585731  | up | noncoding |
| ASHGA5P016696 | 5.69828E-06 | 0.003401089 | 3.3186426  | up | noncoding |
| ASHGA5P045019 | 0.029694843 | 0.107980682 | 2.4555828  | up | noncoding |
| ASHGA5P043241 | 0.035039111 | 0.118455462 | 2.3699407  | up | noncoding |
| ASHGA5P039338 | 0.023221869 | 0.09436573  | 2.1530731  | up | noncoding |
| ASHGA5P032878 | 0.012119127 | 0.067450153 | 2.4207405  | up | noncoding |
| ASHGA5P021682 | 9.26925E-05 | 0.009080764 | 2.5380518  | up | noncoding |
| ASHGA5P021682 | 9.26925E-05 | 0.009080764 | 2.5380518  | up | noncoding |
| ASHGA5P021682 | 9.26925E-05 | 0.009080764 | 2.5380518  | up | noncoding |
| ASHGA5P048251 | 0.000667552 | 0.017209782 | 2.3723946  | up | noncoding |
| ASHGA5P049223 | 0.001133569 | 0.022643498 | 20.1587172 | up | noncoding |
| ASHGA5P031501 | 0.000222045 | 0.011576416 | 2.5645979  | up | noncoding |
| ASHGA5P019869 | 5.76421E-05 | 0.007736798 | 2.4272047  | up | noncoding |
| ASHGA5P019869 | 5.76421E-05 | 0.007736798 | 2.4272047  | up | noncoding |
| ASHGA5P045023 | 0.000314439 | 0.012923818 | 7.3489004  | up | noncoding |
| ASHGA5P040040 | 0.00567076  | 0.047810609 | 8.5614812  | up | noncoding |
| ASHGA5P042658 | 0.004172482 | 0.041167338 | 2.7703821  | up | noncoding |
| ASHGA5P029114 | 0.008461057 | 0.057522562 | 2.1496447  | up | noncoding |
| ASHGA5P018460 | 0.000211894 | 0.01146874  | 3.3763589  | up | noncoding |
| ASHGA5P041921 | 0.003792129 | 0.039487588 | 3.2492451  | up | noncoding |
| ASHGA5P030958 | 0.003440593 | 0.037787575 | 2.8026426  | up | noncoding |
| ASHGA5P023186 | 0.001550485 | 0.026466815 | 5.1086219  | up | noncoding |
| ASHGA5P023186 | 0.001550485 | 0.026466815 | 5.1086219  | up | noncoding |
| ASHGA5P023186 | 0.001550485 | 0.026466815 | 5.1086219  | up | noncoding |
| ASHGA5P023186 | 0.001550485 | 0.026466815 | 5.1086219  | up | noncoding |
| ASHGA5P023186 | 0.001550485 | 0.026466815 | 5.1086219  | up | noncoding |
| ASHGA5P023186 | 0.001550485 | 0.026466815 | 5.1086219  | up | noncoding |
| ASHGA5P023186 | 0.001550485 | 0.026466815 | 5.1086219  | up | noncoding |
| ASHGA5P023186 | 0.001550485 | 0.026466815 | 5.1086219  | up | noncoding |
| ASHGA5P023186 | 0.001550485 | 0.026466815 | 5.1086219  | up | noncoding |
| ASHGA5P014616 | 0.03759377  | 0.123077466 | 2.4817332  | up | noncoding |
| ASHGA5P007912 | 0.028259276 | 0.104954123 | 2.4503068  | up | noncoding |
| ASHGA5P039566 | 2.20734E-05 | 0.005043652 | 3.5896993  | up | noncoding |
| ASHGA5P029655 | 0.027167078 | 0.102915644 | 2.132228   | up | noncoding |

|                    |                    |                     |       |       |   |
|--------------------|--------------------|---------------------|-------|-------|---|
| NR_045370          | LOC100505815       | RefSeq              | 4760  | chr20 | + |
| NR_045370          | LOC100505815       | RefSeq              | 4760  | chr20 | + |
| NR_045370          | LOC100505815       | RefSeq              | 4760  | chr20 | + |
| NR_045370          | LOC100505815       | RefSeq              | 4760  | chr20 | + |
| NR_045370          | LOC100505815       | RefSeq              | 4760  | chr20 | + |
| ENST00000450713    | RP11-656D10.3      | GENCODE             | 605   | chr1  | - |
| uc002ugc.1         | AK127400           | UCSC_knowngene      | 2184  | chr2  | - |
| uc002ugc.1         | AK127400           | UCSC_knowngene      | 2184  | chr2  | - |
| ENST00000429320    | GS1-124K5.2        | GENCODE             | 498   | chr7  | - |
| ENST00000506435    | RP11-506H20.1      | GENCODE             | 770   | chr5  | + |
| ENST00000523087    | RP3-399L15.3       | GENCODE             | 493   | chr6  | + |
| ENST00000434303    | AC090286.2         | pseudogene          | 587   | chr17 | + |
| NR_026797          | LINC00520          | RefSeq              | 2030  | chr14 | - |
| chr18:18297450-183 | chr18:18297450-183 | LincRNAs identified | 13175 | chr18 | - |
| ENST00000419644    | RP11-69E9.1        | GENCODE             | 480   | chr1  | - |
| ENST00000419644    | RP11-69E9.1        | GENCODE             | 480   | chr1  | - |
| ENST00000444302    | RP3-388E23.2       | GENCODE             | 577   | chr6  | + |
| ENST00000444302    | RP3-388E23.2       | GENCODE             | 577   | chr6  | + |
| ENST00000444302    | RP3-388E23.2       | GENCODE             | 577   | chr6  | + |
| ENST00000569428    | RP11-554A11.6      | GENCODE             | 532   | chr11 | + |
| ENST00000569428    | RP11-554A11.6      | GENCODE             | 532   | chr11 | + |
| ENST00000439192    | DGUOK-AS1          | GENCODE             | 563   | chr2  | - |
| ENST00000439192    | DGUOK-AS1          | GENCODE             | 563   | chr2  | - |
| ENST00000432120    | RP11-119K6.6       | GENCODE             | 645   | chr10 | + |
| ENST00000517482    | RP11-383J24.1      | GENCODE             | 553   | chr8  | + |
| ENST00000400465    | FER1L4             | GENCODE             | 3350  | chr20 | - |
| DB378707           |                    | LincRNAs identified | 534   | chr7  | + |
| ENST00000554954    | RP11-982M15.7      | GENCODE             | 486   | chr14 | - |
| ENST00000523935    | RP11-181B11.2      | GENCODE             | 443   | chr8  | + |
| ENST00000523935    | RP11-181B11.2      | GENCODE             | 443   | chr8  | + |
| uc001hkf.2         | PROX1-AS1          | UCSC_knowngene      | 3558  | chr1  | - |
| ENST00000517915    | RP11-89K10.1       | GENCODE             | 317   | chr8  | + |
| ENST00000441882    | RP11-395B7.4       | GENCODE             | 407   | chr7  | - |
| ENST00000506899    | RP11-22A3.2        | GENCODE             | 2694  | chr4  | - |
| ENST00000480811    | C17orf76-AS1       | GENCODE             | 968   | chr17 | + |
| ENST00000540904    | SNHG1              | GENCODE             | 594   | chr11 | - |
| ENST00000540904    | SNHG1              | GENCODE             | 594   | chr11 | - |
| ENST00000540904    | SNHG1              | GENCODE             | 594   | chr11 | - |
| ENST00000533311    | RP11-655M14.13     | GENCODE             | 831   | chr11 | - |
| ENST00000558952    | CRNDE              | GENCODE             | 600   | chr16 | - |
| ENST00000573820    | LA16c-390H2.4      | GENCODE             | 480   | chr16 | + |
| NR_037947          | NSUN2              | RefSeq              | 3304  | chr5  | - |
| NR_037947          | NSUN2              | RefSeq              | 3304  | chr5  | - |
| ENST00000521586    | RP11-382A18.2      | GENCODE             | 290   | chr8  | + |
| ENST00000569927    | RP11-1299A16.3     | GENCODE             | 5647  | chr4  | + |
| ENST00000428044    | RP11-390P2.4       | GENCODE             | 421   | chr6  | + |
| ENST00000555043    | RP11-649E7.5       | GENCODE             | 2469  | chr14 | - |
| ENST00000453795    | AC025627.9         | pseudogene          | 1220  | chr17 | - |
| ENST00000418567    | RP11-379B8.1       | GENCODE             | 822   | chr6  | - |
| TCONS_00006262     | XLOC_002865        | LincRNAs identified | 819   | chr3  | + |
| uc002kmi.3         | BC094703           | UCSC_knowngene      | 2250  | chr18 | + |
| uc002kmi.3         | BC094703           | UCSC_knowngene      | 2250  | chr18 | + |
| uc002kmi.3         | BC094703           | UCSC_knowngene      | 2250  | chr18 | + |
| uc002kmi.3         | BC094703           | UCSC_knowngene      | 2250  | chr18 | + |
| uc002kmi.3         | BC094703           | UCSC_knowngene      | 2250  | chr18 | + |
| uc002kmi.3         | BC094703           | UCSC_knowngene      | 2250  | chr18 | + |
| uc002kmi.3         | BC094703           | UCSC_knowngene      | 2250  | chr18 | + |
| uc002kmi.3         | BC094703           | UCSC_knowngene      | 2250  | chr18 | + |
| ENST00000411839    | RP11-128M1.1       | GENCODE             | 536   | chr20 | + |
| ENST00000492083    | ANKRD19P           | GENCODE             | 426   | chr9  | + |
| ENST00000514608    | RP11-211I0.2       | GENCODE             | 974   | chr4  | - |
| uc001xqo.1         | AK096592           | UCSC_knowngene      | 3327  | chr14 | + |

|           |           |                  |                                        |                       |
|-----------|-----------|------------------|----------------------------------------|-----------------------|
| 62507483  | 62512243  |                  | CGAACCACAGAA' 100505815                | intron sense-overlapp |
| 62507483  | 62512243  |                  | CGAACCACAGAA' 100505815                | intron sense-overlapp |
| 62507483  | 62512243  |                  | CGAACCACAGAA' 100505815                | intron sense-overlapp |
| 62507483  | 62512243  |                  | CGAACCACAGAA' 100505815                | intron sense-overlapp |
| 62507483  | 62512243  |                  | CGAACCACAGAA' 100505815                | intron sense-overlapp |
| 40958828  | 40974333  |                  | CTCTTTGAGATTCATCCAGAGGCTC              | intronic antisense    |
| 171496888 | 171551884 |                  | TGGCTAACAGGTGTGGGTATGCCTG              | intronic antisense    |
| 171496888 | 171551884 |                  | TGGCTAACAGGTGTGGGTATGCCTG              | intronic antisense    |
| 65941289  | 65955046  |                  | CTGAAAGAAAATACAGTGTGTCTAA              | intergenic            |
| 54529761  | 54591029  |                  | AACCAATAGCAGTGAAAACACAT                | natural antisense     |
| 114317118 | 114556880 |                  | TTAAATTTTACAAGCATACTCTCTT              | intronic antisense    |
| 18811591  | 18812178  | NM_002882        | CCATCCACTTCCTGAATATTGAGAATGCACAGAAATTC |                       |
| 56247852  | 56263392  | NR_026796        | GTAAATACCTC/ 645687                    | intergenic            |
| 20043452  | 20056627  |                  | CAAATGCTAGCTCTCCTTACTAAC               | intergenic            |
| 23162205  | 23163342  |                  | ACTCATTTTCTTGAAACACACAGAA.             | intronic antisense    |
| 23162205  | 23163342  |                  | ACTCATTTTCTTGAAACACACAGAA.             | intronic antisense    |
| 135622705 | 135628296 |                  | GCTTTTCTGGACCATAATTATATGA              | intronic antisense    |
| 135622705 | 135628296 |                  | GCTTTTCTGGACCATAATTATATGA              | intronic antisense    |
| 135622705 | 135628296 |                  | GCTTTTCTGGACCATAATTATATGA              | intronic antisense    |
| 68779821  | 68780795  |                  | TAGAGCCCTCTCCTGCTGGAAGAGA              | natural antisense     |
| 68779821  | 68780795  |                  | TAGAGCCCTCTCCTGCTGGAAGAGA              | natural antisense     |
| 74185096  | 74208560  |                  | AACAGATCTAAATTCAACATGACTT              | natural antisense     |
| 74185096  | 74208560  |                  | AACAGATCTAAATTCAACATGACTT              | natural antisense     |
| 96337195  | 96370995  |                  | GAATATGATTTGCAGAAATCTCAGT              | intron sense-overlapp |
| 125283923 | 125289825 |                  | TGGAGAGACCAAGTTTCAGCAGCCA              | intergenic            |
| 34146513  | 34171889  |                  | TCTTTTTTAGGGC 80307                    | intergenic            |
| 17093707  | 17094196  |                  | TTAACTGCGTTCAGAGTTTCCGTCC              | intergenic            |
| 105119935 | 105122124 |                  | TCATTTTGCTGATCTGATGCTTCTCC             | intergenic            |
| 28304780  | 28313204  |                  | GCATAGCTATTTGTCTGTTTGAGTT              | natural antisense     |
| 28304780  | 28313204  |                  | GCATAGCTATTTGTCTGTTTGAGTT              | natural antisense     |
| 213991094 | 214139608 | ENST00000433082  | GACAACATGACT/ 100505832                | intergenic            |
| 127601458 | 127647029 |                  | GAAAAGTCTTGGGGATCCTGAATTC              | intergenic            |
| 100657600 | 100660889 | ENST00000448513  | ATCTGCTCTCCCTCAGATTCTGGTCT             | natural antisense     |
| 12860724  | 12866585  |                  | TGTTACTGAAGACAAAGCAGATACC              | intergenic            |
| 16342640  | 16345146  | ENST00000497774  | ACCCCGAGGGCG/ 125144                   | intergenic            |
| 62622151  | 62622960  | uc001nvs.3       | TGTTGTTGCACCC 23642                    | bidirectional         |
| 62622151  | 62622960  | uc001nvs.3       | TGTTGTTGCACCC 23642                    | bidirectional         |
| 62622151  | 62622960  | uc001nvs.3       | TGTTGTTGCACCC 23642                    | bidirectional         |
| 67385749  | 67394775  |                  | TTGGATTTACAGTACATTGATGGAT.             | intergenic            |
| 54957192  | 54962798  |                  | CTGGCTATTGGA/ 643911                   | intergenic            |
| 3594430   | 3595785   |                  | CAAAGGGGATGCTTTTCACAGCCA               | intronic antisense    |
| 6599351   | 6633473   |                  | TCATCATAAGAG/ 54888                    | exon sense-overlappi  |
| 6599351   | 6633473   |                  | TCATCATAAGAG/ 54888                    | exon sense-overlappi  |
| 128351518 | 128404876 |                  | TGTGGTTCCTGTTGGCCTTTTAACTC             | intergenic            |
| 99580054  | 99585701  |                  | TGGGGCATATCTGTCTCGTAAATAT              | bidirectional         |
| 139015455 | 139018164 |                  | CGCCTCATTTTTTACAATGTGGGCC/             | intergenic            |
| 50087532  | 50090198  |                  | TCGTTAGGGTACAACACTGAATGCTGA            | natural antisense     |
| 20415872  | 20420792  |                  | TAAGCATCTTGGTGGCTGAGCGGTGACCACCTGTCAGG |                       |
| 82554901  | 82643197  |                  | CTTGAGAAAAGCACAGTTCTCTGTC'             | intergenic            |
| 148942374 | 148944122 |                  | CGTCTTAAGGATTTCTGGACTGGGT'             | intergenic            |
| 3603735   | 3608323   |                  | CTGCAGTGAAGCATCAGAAAAGTAT              | intronic antisense    |
| 3603735   | 3608323   |                  | CTGCAGTGAAGCATCAGAAAAGTAT              | intronic antisense    |
| 3603735   | 3608323   |                  | CTGCAGTGAAGCATCAGAAAAGTAT              | intronic antisense    |
| 3603735   | 3608323   |                  | CTGCAGTGAAGCATCAGAAAAGTAT              | intronic antisense    |
| 3603735   | 3608323   |                  | CTGCAGTGAAGCATCAGAAAAGTAT              | intronic antisense    |
| 3603735   | 3608323   |                  | CTGCAGTGAAGCATCAGAAAAGTAT              | intronic antisense    |
| 3603735   | 3608323   |                  | CTGCAGTGAAGCATCAGAAAAGTAT              | intronic antisense    |
| 3603735   | 3608323   |                  | CTGCAGTGAAGCATCAGAAAAGTAT              | intronic antisense    |
| 2187872   | 2193797   |                  | CCGGGCTCTATCCGCCAGCCACGA               | intergenic            |
| 95584503  | 95592045  | ENST00000460854, | AGTCATCTTTGA/ 138649                   | intergenic            |
| 119990478 | 119991452 | NM_018407        | TAGGCAGTGAACATCCCCAAATC                | intergenic            |
| 75292223  | 75295550  |                  | CAACCTGCTTTTCATATGACACAGT/             | intron sense-overlapp |

|                        |         |                          |           |           |
|------------------------|---------|--------------------------|-----------|-----------|
| NM_199359              | TPD52L2 | tumor protein D54 is +   | 62496580  | 62522898  |
| NM_199360              | TPD52L2 | tumor protein D54 is +   | 62496580  | 62522898  |
| NM_199361              | TPD52L2 | tumor protein D54 is +   | 62496580  | 62522898  |
| NM_199362              | TPD52L2 | tumor protein D54 is +   | 62496580  | 62522898  |
| NM_199363              | TPD52L2 | tumor protein D54 is +   | 62496580  | 62522898  |
| NM_198494              | ZNF642  | zinc finger protein 64 + | 40943301  | 40962015  |
| NM_001083615           | MYO3B   | myosin-IIb isoform +     | 171034654 | 171511674 |
| NM_138995              | MYO3B   | myosin-IIb isoform +     | 171034654 | 171511674 |
| NM_019030              | DHX29   | ATP-dependent RNA-       | 54552072  | 54603521  |
| NM_153612              | HS3ST5  | heparan sulfate glucu-   | 114376749 | 114384041 |
| AAAACAAAGTTTGAAGAATGCA |         |                          |           |           |
| NM_004442              | EPHB2   | ephrin type-B recept +   | 23037330  | 23241823  |
| NM_017449              | EPHB2   | ephrin type-B recept +   | 23037330  | 23241823  |
| NM_001134830           | AHI1    | jouberein isoform a -    | 135605109 | 135818903 |
| NM_001134831           | AHI1    | jouberein isoform a -    | 135605109 | 135818903 |
| NM_017651              | AHI1    | jouberein isoform a -    | 135605109 | 135818903 |
| NM_001098515           | MRGPRF  | mas-related G-protei-    | 68771861  | 68780850  |
| NM_145015              | MRGPRF  | mas-related G-protei-    | 68771861  | 68780850  |
| NM_080916              | DGUOK   | deoxyguanosine kina +    | 74153952  | 74186088  |
| NM_080918              | DGUOK   | deoxyguanosine kina +    | 74153952  | 74186088  |
| NM_018063              | HELLS   | lymphoid-specific he +   | 96305573  | 96361856  |
| NM_001258211           | FBXO16  | F-box only protein 1(-   | 28285925  | 28347835  |
| NM_172366              | FBXO16  | F-box only protein 1(-   | 28285925  | 28347835  |
| NM_001164462           | MUC12   | mucin-12 precursor +     | 100612903 | 100662230 |
| NM_001012662           | SLC3A2  | 4F2 cell-surface anti +  | 62623483  | 62656355  |
| NM_001012664           | SLC3A2  | 4F2 cell-surface anti +  | 62623483  | 62656355  |
| NM_002394              | SLC3A2  | 4F2 cell-surface anti +  | 62623483  | 62656355  |
| NM_178844              | NLRC3   | protein NLRC3 -          | 3589035   | 3627392   |
| NM_001193455           | NSUN2   | tRNA (cytosine(34)-(-    | 6599351   | 6633473   |
| NM_017755              | NSUN2   | tRNA (cytosine(34)-(-    | 6599351   | 6633473   |
| NM_005723              | TSPAN5  | tetraspanin-5 -          | 99391517  | 99579812  |
| NM_002408              | MGAT2   | alpha-1,6-mannosyl- +    | 50087488  | 50090199  |
| TGCCTACCATTGTGGAAGAGGT |         |                          |           |           |
| NM_001003809           | DLGAP1  | disks large-associat -   | 3496029   | 3845358   |
| NM_001242761           | DLGAP1  | disks large-associat -   | 3502142   | 4455266   |
| NM_001242762           | DLGAP1  | disks large-associat -   | 3496029   | 3874767   |
| NM_001242763           | DLGAP1  | disks large-associat -   | 3496029   | 3874767   |
| NM_001242764           | DLGAP1  | disks large-associat -   | 3496029   | 3874253   |
| NM_001242765           | DLGAP1  | disks large-associat -   | 3502142   | 3845358   |
| NM_001242766           | DLGAP1  | disks large-associat -   | 3496029   | 3845358   |
| NM_004746              | DLGAP1  | disks large-associat -   | 3496029   | 4455266   |
| NM_019589              | YLPM1   | YLP motif-containin +    | 75230068  | 75304013  |

|             |            |           |           |           |           |
|-------------|------------|-----------|-----------|-----------|-----------|
| 400.742417  | 72.696413  | 8.184351  | 6.43172   | 430.2499  | 444.7889  |
| 400.742417  | 72.696413  | 8.184351  | 6.43172   | 430.2499  | 444.7889  |
| 400.742417  | 72.696413  | 8.184351  | 6.43172   | 430.2499  | 444.7889  |
| 400.742417  | 72.696413  | 8.184351  | 6.43172   | 430.2499  | 444.7889  |
| 400.742417  | 72.696413  | 8.184351  | 6.43172   | 430.2499  | 444.7889  |
| 62.900613   | 20.723452  | 5.605172  | 4.583836  | 60.827667 | 36.478218 |
| 54.54677    | 8.533384   | 4.899135  | 3.184363  | 21.749039 | 14.744379 |
| 54.54677    | 8.533384   | 4.899135  | 3.184363  | 21.749039 | 14.744379 |
| 61.413842   | 19.503972  | 5.526121  | 4.378094  | 68.73289  | 58.854458 |
| 145.05073   | 22.440628  | 6.823642  | 4.371599  | 154.68082 | 157.39021 |
| 851.596687  | 209.394096 | 9.144478  | 7.306408  | 881.5901  | 964.2894  |
| 5816.095817 | 1286.79455 | 12.035452 | 10.728421 | 5597.627  | 5472.839  |
| 387.247206  | 18.930667  | 7.48319   | 3.836445  | 515.30615 | 43.11935  |
| 85.482952   | 24.454407  | 6.068845  | 4.764028  | 95.53612  | 86.710464 |
| 37.750929   | 7.253517   | 4.569731  | 2.826168  | 63.98454  | 32.927906 |
| 37.750929   | 7.253517   | 4.569731  | 2.826168  | 63.98454  | 32.927906 |
| 27.935909   | 5.522752   | 4.308606  | 2.567578  | 40.536224 | 39.428658 |
| 27.935909   | 5.522752   | 4.308606  | 2.567578  | 40.536224 | 39.428658 |
| 27.935909   | 5.522752   | 4.308606  | 2.567578  | 40.536224 | 39.428658 |
| 1561.327045 | 269.743392 | 9.939345  | 7.984968  | 1816.5511 | 2981.1252 |
| 1561.327045 | 269.743392 | 9.939345  | 7.984968  | 1816.5511 | 2981.1252 |
| 2315.61645  | 517.755328 | 10.549264 | 8.920512  | 1611.0001 | 732.5492  |
| 2315.61645  | 517.755328 | 10.549264 | 8.920512  | 1611.0001 | 732.5492  |
| 362.456067  | 46.338651  | 8.092144  | 5.704176  | 347.45618 | 380.49393 |
| 43.068998   | 10.182692  | 4.482868  | 3.320884  | 14.94487  | 4.9999995 |
| 361.010275  | 35.062596  | 7.667166  | 5.399811  | 330.57538 | 37.87852  |
| 35.160467   | 11.579423  | 4.789378  | 3.577235  | 45.00619  | 34.729465 |
| 78.462039   | 27.716027  | 5.918976  | 4.872803  | 98.66611  | 96.89956  |
| 40.108941   | 11.385621  | 4.895455  | 3.597634  | 63.43673  | 33.615604 |
| 40.108941   | 11.385621  | 4.895455  | 3.597634  | 63.43673  | 33.615604 |
| 27.433595   | 5.858006   | 4.36218   | 2.631586  | 21.446217 | 14.700041 |
| 111.122463  | 25.892006  | 6.264322  | 4.968256  | 152.99684 | 78.73606  |
| 121.996748  | 38.412909  | 6.521266  | 5.276415  | 123.85641 | 121.78383 |
| 100.493315  | 25.151237  | 6.054609  | 4.948212  | 131.82559 | 124.76656 |
| 447.260768  | 113.295859 | 8.36343   | 7.087982  | 436.78445 | 562.5906  |
| 132.321046  | 33.232907  | 6.673631  | 5.32991   | 134.44794 | 137.22513 |
| 132.321046  | 33.232907  | 6.673631  | 5.32991   | 134.44794 | 137.22513 |
| 132.321046  | 33.232907  | 6.673631  | 5.32991   | 134.44794 | 137.22513 |
| 170.982025  | 44.829834  | 7.000242  | 5.753898  | 177.85097 | 207.0029  |
| 2214.665237 | 70.263428  | 10.474811 | 6.141479  | 1809.9934 | 468.56042 |
| 132.079049  | 32.469265  | 6.678165  | 5.319433  | 147.8622  | 107.86309 |
| 156.465082  | 41.732691  | 6.933038  | 5.653742  | 165.53354 | 142.97847 |
| 156.465082  | 41.732691  | 6.933038  | 5.653742  | 165.53354 | 142.97847 |
| 2526.19411  | 173.813612 | 10.541442 | 7.663914  | 3953.3062 | 5371.6035 |
| 235.072628  | 24.18902   | 7.327796  | 4.229936  | 208.73431 | 226.13681 |
| 38.152785   | 10.613111  | 4.899736  | 3.429651  | 40.4932   | 41.963474 |
| 27.81431    | 9.480168   | 4.463305  | 3.359206  | 26.456934 | 22.90284  |
| 45.24147    | 7.807521   | 4.956636  | 3.201168  | 35.083885 | 41.6765   |
| 108.556846  | 19.490936  | 5.8804    | 4.180296  | 177.34029 | 163.45955 |
| 20.374541   | 5.319966   | 3.971912  | 2.485124  | 28.58447  | 19.054602 |
| 205.267666  | 22.066708  | 7.047309  | 4.694375  | 212.65639 | 161.93651 |
| 205.267666  | 22.066708  | 7.047309  | 4.694375  | 212.65639 | 161.93651 |
| 205.267666  | 22.066708  | 7.047309  | 4.694375  | 212.65639 | 161.93651 |
| 205.267666  | 22.066708  | 7.047309  | 4.694375  | 212.65639 | 161.93651 |
| 205.267666  | 22.066708  | 7.047309  | 4.694375  | 212.65639 | 161.93651 |
| 205.267666  | 22.066708  | 7.047309  | 4.694375  | 212.65639 | 161.93651 |
| 205.267666  | 22.066708  | 7.047309  | 4.694375  | 212.65639 | 161.93651 |
| 205.267666  | 22.066708  | 7.047309  | 4.694375  | 212.65639 | 161.93651 |
| 205.267666  | 22.066708  | 7.047309  | 4.694375  | 212.65639 | 161.93651 |
| 63.93389    | 14.26614   | 5.398566  | 4.087218  | 94.184044 | 139.80139 |
| 228.947117  | 73.426932  | 7.424546  | 6.131584  | 303.64093 | 168.1736  |
| 1436.524292 | 245.432518 | 10.037526 | 8.193663  | 1669.4965 | 748.42615 |
| 365.283832  | 110.579904 | 8.067936  | 6.975574  | 299.98596 | 306.89484 |

|           |            |           |           |            |           |
|-----------|------------|-----------|-----------|------------|-----------|
| 470.94647 | 512.59265  | 160.49998 | 385.3766  | 82.78152   | 48.545845 |
| 470.94647 | 512.59265  | 160.49998 | 385.3766  | 82.78152   | 48.545845 |
| 470.94647 | 512.59265  | 160.49998 | 385.3766  | 82.78152   | 48.545845 |
| 470.94647 | 512.59265  | 160.49998 | 385.3766  | 82.78152   | 48.545845 |
| 470.94647 | 512.59265  | 160.49998 | 385.3766  | 82.78152   | 48.545845 |
| 86.209946 | 61.677605  | 68.47607  | 63.734173 | 19.405777  | 14.29368  |
| 21.852617 | 157.06029  | 23.627157 | 88.24714  | 6.781066   | 4.9999995 |
| 21.852617 | 157.06029  | 23.627157 | 88.24714  | 6.781066   | 4.9999995 |
| 98.63027  | 61.397125  | 28.800558 | 52.067753 | 27.622778  | 11.89753  |
| 145.94997 | 131.66891  | 121.8468  | 158.76767 | 25.149265  | 6.740981  |
| 498.32635 | 246.11717  | 1348.3446 | 1170.9125 | 334.68225  | 103.2892  |
| 4795.0884 | 3890.8508  | 7654.533  | 7485.6367 | 1181.1555  | 1089.0394 |
| 992.30145 | 51.905445  | 397.1836  | 323.66724 | 4.9999995  | 4.9999995 |
| 81.61853  | 71.47241   | 91.46414  | 86.09605  | 24.44099   | 11.220092 |
| 80.17308  | 23.3321    | 9.746559  | 16.34139  | 4.9999995  | 4.9999995 |
| 80.17308  | 23.3321    | 9.746559  | 16.34139  | 4.9999995  | 4.9999995 |
| 40.548443 | 14.036548  | 12.637059 | 20.42852  | 6.4704423  | 4.9999995 |
| 40.548443 | 14.036548  | 12.637059 | 20.42852  | 6.4704423  | 4.9999995 |
| 40.548443 | 14.036548  | 12.637059 | 20.42852  | 6.4704423  | 4.9999995 |
| 677.9401  | 457.61417  | 1810.0018 | 1624.7299 | 320.51886  | 88.98837  |
| 677.9401  | 457.61417  | 1810.0018 | 1624.7299 | 320.51886  | 88.98837  |
| 2355.707  | 1376.1528  | 4035.575  | 3782.7146 | 235.29517  | 71.16266  |
| 2355.707  | 1376.1528  | 4035.575  | 3782.7146 | 235.29517  | 71.16266  |
| 308.1717  | 227.4295   | 437.69894 | 473.48615 | 45.930614  | 19.24423  |
| 18.179203 | 105.76172  | 40.461678 | 74.06652  | 6.0329356  | 4.9999995 |
| 562.7624  | 144.72275  | 614.1825  | 475.9401  | 23.541683  | 22.387278 |
| 27.620659 | 27.20592   | 37.41918  | 38.98139  | 8.592903   | 4.9999995 |
| 76.4604   | 82.836174  | 65.4012   | 50.50879  | 30.26115   | 8.805974  |
| 39.82322  | 58.73749   | 27.632174 | 17.408428 | 8.09458    | 8.713233  |
| 39.82322  | 58.73749   | 27.632174 | 17.408428 | 8.09458    | 8.713233  |
| 20.049652 | 25.374065  | 40.790966 | 42.24063  | 4.9999995  | 4.9999995 |
| 211.98172 | 112.15047  | 39.725136 | 71.144554 | 22.65035   | 19.460018 |
| 85.956696 | 75.23282   | 168.77599 | 156.37474 | 37.343063  | 11.323491 |
| 52.497528 | 173.24991  | 22.727749 | 97.892555 | 20.300669  | 22.57629  |
| 267.87857 | 633.3051   | 301.52396 | 481.48193 | 106.576035 | 91.05321  |
| 106.31301 | 96.970146  | 157.35245 | 161.6176  | 35.577953  | 31.857523 |
| 106.31301 | 96.970146  | 157.35245 | 161.6176  | 35.577953  | 31.857523 |
| 106.31301 | 96.970146  | 157.35245 | 161.6176  | 35.577953  | 31.857523 |
| 132.61313 | 93.46194   | 213.34871 | 201.6145  | 37.870285  | 32.57299  |
| 2765.8367 | 3524.412   | 1830.8657 | 2888.3232 | 48.439484  | 56.412003 |
| 121.0324  | 106.439415 | 147.42929 | 161.8479  | 27.994642  | 30.020905 |
| 159.25587 | 136.24634  | 150.9698  | 183.80647 | 45.105595  | 30.954994 |
| 159.25587 | 136.24634  | 150.9698  | 183.80647 | 45.105595  | 30.954994 |
| 2132.8208 | 1812.2202  | 550.87396 | 1336.34   | 226.25665  | 315.07864 |
| 207.01282 | 447.94434  | 64.89527  | 255.71222 | 39.89247   | 6.946046  |
| 40.77576  | 25.131998  | 40.435783 | 40.116497 | 16.868486  | 6.9931965 |
| 24.764153 | 40.513588  | 20.80523  | 31.443117 | 10.345749  | 4.9999995 |
| 31.654156 | 16.371872  | 85.89864  | 60.763767 | 7.550785   | 7.2538986 |
| 179.48364 | 12.012521  | 73.59105  | 45.454025 | 28.163158  | 11.197451 |
| 28.905907 | 17.768698  | 10.675709 | 17.257862 | 4.9999995  | 4.9999995 |
| 253.88686 | 36.746304  | 308.48373 | 257.8962  | 19.503036  | 22.273462 |
| 253.88686 | 36.746304  | 308.48373 | 257.8962  | 19.503036  | 22.273462 |
| 253.88686 | 36.746304  | 308.48373 | 257.8962  | 19.503036  | 22.273462 |
| 253.88686 | 36.746304  | 308.48373 | 257.8962  | 19.503036  | 22.273462 |
| 253.88686 | 36.746304  | 308.48373 | 257.8962  | 19.503036  | 22.273462 |
| 253.88686 | 36.746304  | 308.48373 | 257.8962  | 19.503036  | 22.273462 |
| 253.88686 | 36.746304  | 308.48373 | 257.8962  | 19.503036  | 22.273462 |
| 253.88686 | 36.746304  | 308.48373 | 257.8962  | 19.503036  | 22.273462 |
| 253.88686 | 36.746304  | 308.48373 | 257.8962  | 19.503036  | 22.273462 |
| 50.89563  | 40.882626  | 23.713003 | 34.126648 | 10.246801  | 10.32512  |
| 324.02002 | 154.47339  | 181.10097 | 242.27379 | 92.744514  | 9.94977   |
| 2004.8351 | 1391.0554  | 1285.7776 | 1519.555  | 338.68628  | 120.9292  |
| 272.63986 | 598.0412   | 240.00005 | 474.14108 | 125.7918   | 48.612125 |

|            |           |           |            |           |           |
|------------|-----------|-----------|------------|-----------|-----------|
| 113.574196 | 95.654915 | 43.03704  | 52.584965  | 8.28749   | 8.484675  |
| 113.574196 | 95.654915 | 43.03704  | 52.584965  | 8.28749   | 8.484675  |
| 113.574196 | 95.654915 | 43.03704  | 52.584965  | 8.28749   | 8.484675  |
| 113.574196 | 95.654915 | 43.03704  | 52.584965  | 8.28749   | 8.484675  |
| 113.574196 | 95.654915 | 43.03704  | 52.584965  | 8.28749   | 8.484675  |
| 35.462196  | 12.557801 | 23.40824  | 19.213018  | 5.4680576 | 5.096133  |
| 5.5509233  | 15.98697  | 7.751524  | 10.12982   | 3.9830396 | 3.9070604 |
| 5.5509233  | 15.98697  | 7.751524  | 10.12982   | 3.9830396 | 3.9070604 |
| 39.295685  | 9.539519  | 16.052668 | 12.61565   | 5.642805  | 5.718027  |
| 45.286613  | 5.469217  | 36.441875 | 15.5558195 | 6.815986  | 7.059497  |
| 590.3896   | 26.40857  | 149.53032 | 52.064636  | 9.316734  | 9.574456  |
| 1255.398   | 1280.3105 | 1674.8962 | 1239.9677  | 11.95285  | 11.963039 |
| 4.9999995  | 44.04406  | 25.451574 | 29.08837   | 8.525904  | 5.3180714 |
| 47.140793  | 28.098911 | 20.561304 | 15.264351  | 6.131279  | 6.239282  |
| 4.9999995  | 14.036647 | 4.9999995 | 9.484457   | 5.5416555 | 4.965174  |
| 4.9999995  | 14.036647 | 4.9999995 | 9.484457   | 5.5416555 | 4.965174  |
| 4.9999995  | 4.9999995 | 6.666071  | 4.9999995  | 4.8775835 | 5.198589  |
| 4.9999995  | 4.9999995 | 6.666071  | 4.9999995  | 4.8775835 | 5.198589  |
| 4.9999995  | 4.9999995 | 6.666071  | 4.9999995  | 4.8775835 | 5.198589  |
| 772.3608   | 119.09471 | 208.09142 | 109.40619  | 10.348287 | 11.118158 |
| 772.3608   | 119.09471 | 208.09142 | 109.40619  | 10.348287 | 11.118158 |
| 407.02402  | 437.77448 | 1277.904  | 677.37164  | 10.18626  | 9.19311   |
| 407.02402  | 437.77448 | 1277.904  | 677.37164  | 10.18626  | 9.19311   |
| 80.5605    | 30.290562 | 61.760548 | 40.24545   | 7.988207  | 8.280949  |
| 4.9999995  | 19.78607  | 13.413679 | 11.863471  | 3.4295454 | 2.3499577 |
| 27.37763   | 45.989754 | 47.578785 | 43.500446  | 7.91233   | 5.1460795 |
| 11.190721  | 14.184779 | 21.117222 | 9.390912   | 5.0325212 | 5.0352874 |
| 57.56096   | 18.96397  | 27.29727  | 23.406837  | 6.173862  | 6.3803196 |
| 21.390526  | 9.842773  | 4.9999995 | 15.272612  | 5.5296226 | 4.992101  |
| 21.390526  | 9.842773  | 4.9999995 | 15.272612  | 5.5296226 | 4.992101  |
| 4.9999995  | 4.9999995 | 9.18361   | 5.964427   | 3.9617064 | 3.9025369 |
| 21.219084  | 40.961533 | 29.958815 | 21.102236  | 6.8007755 | 6.1107016 |
| 91.79012   | 35.628662 | 34.374077 | 20.01804   | 6.5010376 | 6.7027397 |
| 19.092918  | 35.926678 | 22.215483 | 30.795382  | 6.5946174 | 6.735208  |
| 101.83106  | 66.982376 | 198.81937 | 114.5131   | 8.305873  | 8.826876  |
| 34.78301   | 25.102047 | 48.171326 | 23.905582  | 6.6201415 | 6.8688946 |
| 34.78301   | 25.102047 | 48.171326 | 23.905582  | 6.6201415 | 6.8688946 |
| 34.78301   | 25.102047 | 48.171326 | 23.905582  | 6.6201415 | 6.8688946 |
| 56.170876  | 39.223873 | 69.5932   | 33.54778   | 7.0197916 | 7.439549  |
| 29.159756  | 171.99512 | 20.56823  | 95.005974  | 10.341629 | 8.564204  |
| 43.80249   | 24.894522 | 33.48304  | 34.61999   | 6.7525077 | 6.5350475 |
| 59.338627  | 30.55569  | 51.854176 | 32.587063  | 6.9132805 | 6.9284525 |
| 59.338627  | 30.55569  | 51.854176 | 32.587063  | 6.9132805 | 6.9284525 |
| 93.46478   | 185.0136  | 102.13541 | 120.932594 | 11.44923  | 11.938954 |
| 71.041794  | 8.385096  | 10.967418 | 7.9012985  | 7.252239  | 7.565162  |
| 19.074255  | 4.9999995 | 10.742729 | 4.9999995  | 4.876491  | 5.2811337 |
| 13.281881  | 8.904524  | 11.00595  | 8.342902   | 4.2690463 | 4.4754643 |
| 7.3542194  | 4.9999995 | 11.508641 | 8.177583   | 4.672278  | 5.2708964 |
| 49.60299   | 5.136861  | 11.837968 | 11.007189  | 7.0162473 | 7.110643  |
| 4.9999995  | 4.9999995 | 6.919796  | 4.9999995  | 4.383658  | 4.238575  |
| 18.16654   | 14.15988  | 39.22512  | 19.072212  | 7.282482  | 7.096914  |
| 18.16654   | 14.15988  | 39.22512  | 19.072212  | 7.282482  | 7.096914  |
| 18.16654   | 14.15988  | 39.22512  | 19.072212  | 7.282482  | 7.096914  |
| 18.16654   | 14.15988  | 39.22512  | 19.072212  | 7.282482  | 7.096914  |
| 18.16654   | 14.15988  | 39.22512  | 19.072212  | 7.282482  | 7.096914  |
| 18.16654   | 14.15988  | 39.22512  | 19.072212  | 7.282482  | 7.096914  |
| 18.16654   | 14.15988  | 39.22512  | 19.072212  | 7.282482  | 7.096914  |
| 18.16654   | 14.15988  | 39.22512  | 19.072212  | 7.282482  | 7.096914  |
| 16.488829  | 13.169891 | 20.10348  | 15.262721  | 6.110185  | 6.898524  |
| 91.752     | 38.556618 | 136.13249 | 71.4262    | 7.794395  | 7.156603  |
| 404.9294   | 176.62932 | 240.06479 | 191.35612  | 10.235072 | 9.223209  |
| 206.79488  | 73.68741  | 128.37483 | 80.21838   | 7.7760553 | 7.9894986 |

|            |           |           |            |           |           |
|------------|-----------|-----------|------------|-----------|-----------|
| 8.530447   | 8.683948  | 7.101765  | 8.01778    | 6.5971103 | 6.4474926 |
| 8.530447   | 8.683948  | 7.101765  | 8.01778    | 6.5971103 | 6.4474926 |
| 8.530447   | 8.683948  | 7.101765  | 8.01778    | 6.5971103 | 6.4474926 |
| 8.530447   | 8.683948  | 7.101765  | 8.01778    | 6.5971103 | 6.4474926 |
| 8.530447   | 8.683948  | 7.101765  | 8.01778    | 6.5971103 | 6.4474926 |
| 6.1145105  | 5.5712175 | 5.8973746 | 5.4837375  | 4.5156016 | 4.6495347 |
| 4.135307   | 6.9723787 | 4.4530163 | 5.9440107  | 2.9597833 | 2.4279919 |
| 4.135307   | 6.9723787 | 4.4530163 | 5.9440107  | 2.9597833 | 2.4279919 |
| 6.3031664  | 5.5642824 | 4.7137165 | 5.2147317  | 5.0232244 | 4.362938  |
| 6.8646913  | 6.7106695 | 6.706986  | 6.784023   | 4.895192  | 3.5127513 |
| 8.61003    | 7.6380415 | 10.12401  | 9.603598   | 8.653327  | 7.5387526 |
| 11.87361   | 11.575719 | 12.583225 | 12.264268  | 10.508742 | 10.964863 |
| 9.582331   | 5.303317  | 8.379883  | 7.789635   | 2.3467326 | 2.4279919 |
| 6.03405    | 5.7947083 | 6.3046255 | 5.909124   | 4.852783  | 4.2797875 |
| 6.0102873  | 4.053699  | 3.2385747 | 3.608997   | 2.3467326 | 2.4279919 |
| 6.0102873  | 4.053699  | 3.2385747 | 3.608997   | 2.3467326 | 2.4279919 |
| 5.0254507  | 3.2326677 | 3.5995119 | 3.9178333  | 2.8905628 | 2.4279919 |
| 5.0254507  | 3.2326677 | 3.5995119 | 3.9178333  | 2.8905628 | 2.4279919 |
| 5.0254507  | 3.2326677 | 3.5995119 | 3.9178333  | 2.8905628 | 2.4279919 |
| 9.042802   | 8.524173  | 10.52566  | 10.076989  | 8.594909  | 7.3246202 |
| 9.042802   | 8.524173  | 10.52566  | 10.076989  | 8.594909  | 7.3246202 |
| 10.861384  | 10.103235 | 11.679065 | 11.2725315 | 8.131969  | 6.9998484 |
| 10.861384  | 10.103235 | 11.679065 | 11.2725315 | 8.131969  | 6.9998484 |
| 7.9296865  | 7.5251203 | 8.514866  | 8.314035   | 5.7509656 | 5.0912514 |
| 3.8650498  | 6.375064  | 5.1793556 | 5.698235   | 2.7952871 | 2.4279919 |
| 8.774788   | 6.8501253 | 8.999585  | 8.320087   | 4.797934  | 5.3134613 |
| 4.4786997  | 4.303238  | 5.0738363 | 4.812683   | 3.3134234 | 2.4279919 |
| 5.9405036  | 6.0174527 | 5.8334036 | 5.168317   | 5.1523995 | 3.9140952 |
| 4.9985676  | 5.495871  | 4.65747   | 3.699097   | 3.2193837 | 3.8980575 |
| 4.9985676  | 5.495871  | 4.65747   | 3.699097   | 3.2193837 | 3.8980575 |
| 4.0030117  | 4.1908183 | 5.193052  | 4.921953   | 2.3467326 | 2.4279919 |
| 7.4123926  | 6.4676766 | 5.151762  | 5.6426225  | 4.7410307 | 5.1078234 |
| 6.110303   | 5.873739  | 7.1736655 | 6.766109   | 5.4592195 | 4.292384  |
| 5.395195   | 7.1109986 | 4.3987904 | 6.0928473  | 4.5789    | 5.3249574 |
| 7.730387   | 8.991877  | 7.9880214 | 8.337546   | 6.972909  | 7.358615  |
| 6.415063   | 6.2493677 | 7.0776844 | 6.810637   | 5.3881826 | 5.83121   |
| 6.415063   | 6.2493677 | 7.0776844 | 6.810637   | 5.3881826 | 5.83121   |
| 6.415063   | 6.2493677 | 7.0776844 | 6.810637   | 5.3881826 | 5.83121   |
| 6.7259846  | 6.1934466 | 7.4956903 | 7.126987   | 5.4796605 | 5.864566  |
| 11.0663395 | 11.444418 | 10.544133 | 10.8881445 | 5.832375  | 6.673009  |
| 6.599952   | 6.384901  | 6.9839907 | 6.8125935  | 5.0430794 | 5.746234  |
| 6.9805536  | 6.7612343 | 7.019458  | 6.995248   | 5.7253222 | 5.7898073 |
| 6.9805536  | 6.7612343 | 7.019458  | 6.995248   | 5.7253222 | 5.7898073 |
| 10.704519  | 10.504831 | 8.848296  | 9.802824   | 8.073602  | 9.156576  |
| 7.378119   | 8.498161  | 5.823613  | 7.4494824  | 5.5541863 | 3.5599482 |
| 5.0343432  | 4.1754317 | 5.1783333 | 4.852681   | 4.309779  | 3.5686388 |
| 4.319272   | 4.921042  | 4.2755427 | 4.51946    | 3.5985448 | 2.4279919 |
| 4.674862   | 3.4819586 | 6.2199244 | 5.4198976  | 3.1116595 | 3.6211133 |
| 7.1583014  | 2.9806724 | 5.996013  | 5.020525   | 5.0510387 | 4.2757807 |
| 4.544694   | 3.6090968 | 3.367957  | 3.6874905  | 2.3467326 | 2.4279919 |
| 7.653679   | 4.7664685 | 8.022054  | 7.4622574  | 4.5225024 | 5.3062377 |
| 7.653679   | 4.7664685 | 8.022054  | 7.4622574  | 4.5225024 | 5.3062377 |
| 7.653679   | 4.7664685 | 8.022054  | 7.4622574  | 4.5225024 | 5.3062377 |
| 7.653679   | 4.7664685 | 8.022054  | 7.4622574  | 4.5225024 | 5.3062377 |
| 7.653679   | 4.7664685 | 8.022054  | 7.4622574  | 4.5225024 | 5.3062377 |
| 7.653679   | 4.7664685 | 8.022054  | 7.4622574  | 4.5225024 | 5.3062377 |
| 7.653679   | 4.7664685 | 8.022054  | 7.4622574  | 4.5225024 | 5.3062377 |
| 7.653679   | 4.7664685 | 8.022054  | 7.4622574  | 4.5225024 | 5.3062377 |
| 7.653679   | 4.7664685 | 8.022054  | 7.4622574  | 4.5225024 | 5.3062377 |
| 5.354027   | 4.936578  | 4.457778  | 4.6343026  | 3.583119  | 4.1535244 |
| 8.004561   | 6.946399  | 7.2689795 | 7.3763385  | 6.766363  | 4.0966506 |
| 10.612279  | 10.119452 | 10.057912 | 9.977232   | 8.673     | 7.765064  |
| 7.755804   | 8.905782  | 7.663843  | 8.316631   | 7.207845  | 6.450272  |



|           |           |           |           |
|-----------|-----------|-----------|-----------|
| 6.7897825 | 6.9109945 | 5.699424  | 6.1455135 |
| 6.7897825 | 6.9109945 | 5.699424  | 6.1455135 |
| 6.7897825 | 6.9109945 | 5.699424  | 6.1455135 |
| 6.7897825 | 6.9109945 | 5.699424  | 6.1455135 |
| 6.7897825 | 6.9109945 | 5.699424  | 6.1455135 |
| 5.1523995 | 3.7681487 | 4.822117  | 4.595216  |
| 2.6961973 | 4.1405125 | 3.2495263 | 3.632169  |
| 2.6961973 | 4.1405125 | 3.2495263 | 3.632169  |
| 5.2956986 | 3.350052  | 4.2770696 | 3.9595785 |
| 5.4992824 | 2.5799823 | 5.4618535 | 4.280535  |
| 9.149382  | 4.9151745 | 7.4518023 | 6.1300116 |
| 10.235072 | 10.825296 | 10.961977 | 10.874577 |
| 2.350709  | 5.709058  | 4.940152  | 5.244028  |
| 5.5574336 | 5.015324  | 4.6274443 | 4.251393  |
| 2.350709  | 3.9391282 | 2.3618152 | 3.530634  |
| 2.350709  | 3.9391282 | 2.3618152 | 3.530634  |
| 2.350709  | 2.3408759 | 3.0425775 | 2.352752  |
| 2.350709  | 2.3408759 | 3.0425775 | 2.352752  |
| 2.350709  | 2.3408759 | 3.0425775 | 2.352752  |
| 9.541262  | 7.252679  | 7.9527364 | 7.243604  |
| 9.541262  | 7.252679  | 7.9527364 | 7.243604  |
| 8.629734  | 9.222115  | 10.576612 | 9.962795  |
| 8.629734  | 9.222115  | 10.576612 | 9.962795  |
| 6.296566  | 5.131464  | 6.2142    | 5.740606  |
| 2.350709  | 4.464144  | 4.017787  | 3.8693838 |
| 4.796448  | 5.780081  | 5.847417  | 5.863523  |
| 3.5801945 | 3.9557266 | 4.66864   | 3.5174322 |
| 5.83351   | 4.3980055 | 5.043133  | 4.8956723 |
| 4.454823  | 3.3991673 | 2.3618152 | 4.252555  |
| 4.454823  | 3.3991673 | 2.3618152 | 4.252555  |
| 2.350709  | 2.3408759 | 3.483499  | 2.8397102 |
| 4.44475   | 5.594043  | 5.1819935 | 4.7398973 |
| 6.4854016 | 5.386405  | 5.3787117 | 4.6563663 |
| 4.303238  | 5.39892   | 4.745561  | 5.3376966 |
| 6.6332884 | 6.3718486 | 7.8821135 | 7.3091154 |
| 5.1287136 | 4.8391314 | 5.8633924 | 4.928829  |
| 5.1287136 | 4.8391314 | 5.8633924 | 4.928829  |
| 5.1287136 | 4.8391314 | 5.8633924 | 4.928829  |
| 5.801211  | 5.529325  | 6.3851333 | 5.4634895 |
| 4.886387  | 7.802719  | 4.6277194 | 7.026667  |
| 5.449744  | 4.8249235 | 5.3382306 | 5.514385  |
| 5.8779507 | 5.1432085 | 5.966532  | 5.4196315 |
| 5.8779507 | 5.1432085 | 5.966532  | 5.4196315 |
| 6.512019  | 7.922687  | 6.9291496 | 7.38945   |
| 6.1223397 | 3.1584446 | 3.7304301 | 3.254265  |
| 4.3025103 | 2.3408759 | 3.7033482 | 2.352752  |
| 3.8066633 | 3.2540982 | 3.7355707 | 3.332369  |
| 3.0291898 | 2.3408759 | 3.797826  | 3.3063428 |
| 5.6308594 | 2.5295956 | 3.8407645 | 3.7537358 |
| 2.350709  | 2.3408759 | 3.0916831 | 2.352752  |
| 4.2383866 | 3.9529219 | 5.563604  | 4.5825973 |
| 4.2383866 | 3.9529219 | 5.563604  | 4.5825973 |
| 4.2383866 | 3.9529219 | 5.563604  | 4.5825973 |
| 4.2383866 | 3.9529219 | 5.563604  | 4.5825973 |
| 4.2383866 | 3.9529219 | 5.563604  | 4.5825973 |
| 4.2383866 | 3.9529219 | 5.563604  | 4.5825973 |
| 4.2383866 | 3.9529219 | 5.563604  | 4.5825973 |
| 4.2383866 | 3.9529219 | 5.563604  | 4.5825973 |
| 4.1013002 | 3.8410258 | 4.593457  | 4.2508802 |
| 6.4848495 | 5.5040965 | 7.3294683 | 6.6080737 |
| 8.620922  | 7.845251  | 8.16127   | 8.096471  |
| 7.6424513 | 6.524137  | 7.2481155 | 6.780623  |

|               |             |             |           |    |           |
|---------------|-------------|-------------|-----------|----|-----------|
| ASHGA5P044228 | 0.000245181 | 0.012133712 | 4.9727329 | up | noncoding |
| ASHGA5P042595 | 0.022694376 | 0.093195005 | 2.3123553 | up | noncoding |
| ASHGA5P051677 | 0.002412598 | 0.031997277 | 2.2367614 | up | noncoding |
| ASHGA5P031617 | 4.67316E-06 | 0.003111069 | 2.0764589 | up | noncoding |
| ASHGA5P041337 | 0.002809936 | 0.034179323 | 3.3080749 | up | noncoding |
| ASHGA5P029537 | 0.005014513 | 0.044969228 | 2.4185236 | up | noncoding |
| ASHGA5P029537 | 0.005014513 | 0.044969228 | 2.4185236 | up | noncoding |
| ASHGA5P035732 | 0.00279312  | 0.034179323 | 2.2816323 | up | noncoding |
| ASHGA5P016346 | 0.006791964 | 0.052273054 | 3.145239  | up | noncoding |
| ASHGA5P028459 | 0.000189801 | 0.01146874  | 5.2941512 | up | noncoding |
| ASHGA5P044744 | 0.002427035 | 0.032019471 | 2.518527  | up | noncoding |
| ASHGA5P021755 | 9.85012E-05 | 0.009080764 | 2.8687017 | up | noncoding |
| ASHGA5P021755 | 9.85012E-05 | 0.009080764 | 2.8687017 | up | noncoding |
| ASHGA5P021755 | 9.85012E-05 | 0.009080764 | 2.8687017 | up | noncoding |
| ASHGA5P058489 | 0.000271832 | 0.012302262 | 3.8635173 | up | noncoding |
| ASHGA5P021539 | 0.000893021 | 0.020125432 | 3.3510039 | up | noncoding |
| ASHGA5P029013 | 0.000551831 | 0.016097331 | 2.9361061 | up | noncoding |
| ASHGA5P043694 | 0.018203891 | 0.081962493 | 2.1373239 | up | noncoding |
| ASHGA5P043694 | 0.018203891 | 0.081962493 | 2.1373239 | up | noncoding |
| ASHGA5P025658 | 0.021397878 | 0.090137716 | 2.1448767 | up | noncoding |
| ASHGA5P047541 | 0.00235576  | 0.031728208 | 5.332836  | up | noncoding |
| ASHGA5P038000 | 0.041926277 | 0.13107999  | 2.580326  | up | noncoding |
| ASHGA5P036261 | 0.035551975 | 0.119284932 | 2.3618837 | up | noncoding |
| ASHGA5P037473 | 0.036390773 | 0.120992679 | 3.2619341 | up | noncoding |
| ASHGA5P037473 | 0.036390773 | 0.120992679 | 3.2619341 | up | noncoding |
| ASHGA5P037473 | 0.036390773 | 0.120992679 | 3.2619341 | up | noncoding |
| ASHGA5P037473 | 0.036390773 | 0.120992679 | 3.2619341 | up | noncoding |
| ASHGA5P037473 | 0.036390773 | 0.120992679 | 3.2619341 | up | noncoding |
| ASHGA5P037473 | 0.036390773 | 0.120992679 | 3.2619341 | up | noncoding |
| ASHGA5P054918 | 9.93559E-05 | 0.009080764 | 2.6097212 | up | noncoding |
| ASHGA5P043658 | 0.005453514 | 0.046969887 | 2.5688962 | up | noncoding |
| ASHGA5P015886 | 0.01093771  | 0.064718011 | 3.4706248 | up | noncoding |
| ASHGA5P015886 | 0.01093771  | 0.064718011 | 3.4706248 | up | noncoding |
| ASHGA5P015886 | 0.01093771  | 0.064718011 | 3.4706248 | up | noncoding |
| ASHGA5P036783 | 0.025363417 | 0.099118545 | 2.1476594 | up | noncoding |
| ASHGA5P038470 | 0.012018245 | 0.06714145  | 2.5620256 | up | noncoding |
| ASHGA5P049487 | 0.007268553 | 0.053644962 | 2.1886608 | up | noncoding |
| ASHGA5P040059 | 0.016132575 | 0.077717436 | 2.2538267 | up | noncoding |
| ASHGA5P034023 | 0.006636074 | 0.051810468 | 2.061943  | up | noncoding |
| ASHGA5P029339 | 0.002609503 | 0.032993346 | 2.023697  | up | noncoding |
| ASHGA5P030482 | 0.008153012 | 0.056720455 | 2.8674021 | up | noncoding |
| ASHGA5P030482 | 0.008153012 | 0.056720455 | 2.8674021 | up | noncoding |
| ASHGA5P030482 | 0.008153012 | 0.056720455 | 2.8674021 | up | noncoding |
| ASHGA5P030482 | 0.008153012 | 0.056720455 | 2.8674021 | up | noncoding |
| ASHGA5P030482 | 0.008153012 | 0.056720455 | 2.8674021 | up | noncoding |
| ASHGA5P023414 | 0.00173415  | 0.027807594 | 2.6437683 | up | noncoding |
| ASHGA5P028264 | 0.002236962 | 0.031175176 | 2.2213742 | up | noncoding |
| ASHGA5P028264 | 0.002236962 | 0.031175176 | 2.2213742 | up | noncoding |
| ASHGA5P037118 | 0.000400193 | 0.014223693 | 3.2594046 | up | noncoding |
| ASHGA5P034195 | 0.007486306 | 0.054377035 | 2.3550697 | up | noncoding |
| ASHGA5P027837 | 0.001966782 | 0.029367232 | 2.350743  | up | noncoding |
| ASHGA5P044929 | 0.005590085 | 0.04747657  | 2.4997847 | up | noncoding |
| ASHGA5P029638 | 0.000577699 | 0.016232767 | 2.9733644 | up | noncoding |
| ASHGA5P029638 | 0.000577699 | 0.016232767 | 2.9733644 | up | noncoding |
| ASHGA5P036620 | 0.014981413 | 0.074989017 | 2.1393041 | up | noncoding |
| ASHGA5P000322 | 0.028584879 | 0.105405981 | 2.1022091 | up | noncoding |
| ASHGA5P052420 | 0.007692703 | 0.055067411 | 2.3951771 | up | noncoding |
| ASHGA5P036777 | 0.001322516 | 0.024233782 | 2.5964448 | up | noncoding |
| ASHGA5P055679 | 0.036656376 | 0.121455823 | 2.4217533 | up | noncoding |
| ASHGA5P053210 | 0.000495467 | 0.015564508 | 4.4700719 | up | noncoding |
| ASHGA5P038919 | 0.001615729 | 0.026987492 | 2.347238  | up | noncoding |
| ASHGA5P044525 | 0.006267053 | 0.05052414  | 2.7395188 | up | noncoding |
| ASHGA5P048836 | 0.012765774 | 0.069158933 | 2.4401793 | up | noncoding |

|                    |                    |                     |       |       |   |
|--------------------|--------------------|---------------------|-------|-------|---|
| ENST00000578500    | RP11-360L9.7       | GENCODE             | 884   | chr8  | - |
| TCONS_00020785     | XLOC_010078        | LincRNAs identified | 277   | chr12 | - |
| ENST00000273411    | RPL39P5            | GENCODE             | 449   | chr3  | - |
| ENST00000568262    | CTD-2196E14.6      | GENCODE             | 919   | chr16 | + |
| ENST00000510853    | CTC-369A16.3       | GENCODE             | 591   | chr5  | + |
| NR_037792          | LRR1               | RefSeq              | 1965  | chr14 | + |
| NR_037792          | LRR1               | RefSeq              | 1965  | chr14 | + |
| ENST00000426539    | AC130710.1         | GENCODE             | 1096  | chr2  | + |
| uc003ftr.2         | LOC100131551       | UCSC_knowngene      | 1718  | chr3  | - |
| ENST00000413591    | LINC00365          | GENCODE             | 2618  | chr13 | - |
| ENST00000518096    | TUBBP1             | GENCODE             | 1646  | chr8  | + |
| ENST00000539975    | SNHG1              | GENCODE             | 955   | chr11 | - |
| ENST00000539975    | SNHG1              | GENCODE             | 955   | chr11 | - |
| ENST00000539975    | SNHG1              | GENCODE             | 955   | chr11 | - |
| uc004aut.1         | BC080653           | UCSC_knowngene      | 1212  | chr9  | + |
| ENST00000534398    | RP11-429J17.6      | GENCODE             | 582   | chr8  | + |
| ENST00000557232    | AE000662.93        | GENCODE             | 386   | chr14 | - |
| uc003ttf.3         | BC053669           | UCSC_knowngene      | 2761  | chr7  | + |
| uc003ttf.3         | BC053669           | UCSC_knowngene      | 2761  | chr7  | + |
| NR_024405          | LOC730101          | RefSeq              | 3554  | chr6  | + |
| AA731927           |                    | LincRNAs identified | 270   | chr2  | + |
| NR_039988          | LOC100130899       | RefSeq              | 4246  | chr22 | + |
| ENST00000453206    | AC016751.3         | GENCODE             | 280   | chr2  | + |
| ENST00000429588    | AP000695.6         | GENCODE             | 893   | chr21 | + |
| ENST00000429588    | AP000695.6         | GENCODE             | 893   | chr21 | + |
| ENST00000429588    | AP000695.6         | GENCODE             | 893   | chr21 | + |
| ENST00000429588    | AP000695.6         | GENCODE             | 893   | chr21 | + |
| ENST00000429588    | AP000695.6         | GENCODE             | 893   | chr21 | + |
| ENST00000545920    | SNHG1              | GENCODE             | 625   | chr11 | - |
| ENST00000541385    | LINC00525          | GENCODE             | 1173  | chr7  | + |
| ENST00000424434    | RP1-309F20.3       | GENCODE             | 367   | chr20 | - |
| ENST00000424434    | RP1-309F20.3       | GENCODE             | 367   | chr20 | - |
| ENST00000424434    | RP1-309F20.3       | GENCODE             | 367   | chr20 | - |
| TCONS_00026565     | XLOC_012884        | LincRNAs identified | 563   | chr18 | - |
| ENST00000460977    | RP11-383G6.3       | GENCODE             | 765   | chr3  | - |
| NR_033827          | KDM4A-AS1          | RefSeq              | 1574  | chr1  | - |
| ENST00000508266    | LEF1-AS1           | GENCODE             | 559   | chr4  | + |
| TCONS_00004043     | XLOC_001882        | LincRNAs identified | 796   | chr2  | + |
| ENST00000557546    | RP11-566J3.2       | GENCODE             | 722   | chr14 | - |
| ENST00000559959    | RP11-16O9.2        | GENCODE             | 476   | chr15 | + |
| ENST00000559959    | RP11-16O9.2        | GENCODE             | 476   | chr15 | + |
| ENST00000559959    | RP11-16O9.2        | GENCODE             | 476   | chr15 | + |
| ENST00000559959    | RP11-16O9.2        | GENCODE             | 476   | chr15 | + |
| ENST00000559959    | RP11-16O9.2        | GENCODE             | 476   | chr15 | + |
| ENST00000559959    | RP11-16O9.2        | GENCODE             | 476   | chr15 | + |
| ENST00000580458    | SNHG15             | GENCODE             | 710   | chr7  | - |
| ENST00000542331    | RP11-443D10.2      | GENCODE             | 560   | chr12 | + |
| ENST00000542331    | RP11-443D10.2      | GENCODE             | 560   | chr12 | + |
| ENST00000414762    | RP11-96L14.7       | GENCODE             | 447   | chr1  | - |
| ENST00000566551    | RP5-1057J7.6       | GENCODE             | 5444  | chr1  | - |
| ENST00000538231    | RP11-392P7.6       | GENCODE             | 457   | chr12 | + |
| ENST00000517655    | KB-1047C11.2       | GENCODE             | 562   | chr8  | + |
| ENST00000557691    | RP6-65G23.3        | GENCODE             | 629   | chr14 | + |
| ENST00000557691    | RP6-65G23.3        | GENCODE             | 629   | chr14 | + |
| TCONS_00016396     | XLOC_007765        | LincRNAs identified | 936   | chr9  | - |
| chr2:102247075-102 | chr2:102247075-102 | LincRNAs identified | 13675 | chr2  | + |
| ENST00000521133    | CTB-131B5.4        | GENCODE             | 454   | chr5  | - |
| uc002xig.3         | LOC388796          | UCSC_knowngene      | 2149  | chr20 | - |
| uc003wmd.1         | AX747269           | UCSC_knowngene      | 2946  | chr7  | - |
| ENST00000411909    | AZGP1P1            | pseudogene          | 902   | chr7  | + |
| ENST00000569034    | RP11-15N24.4       | GENCODE             | 2164  | chr3  | + |
| uc003ysb.3         | BC106081           | UCSC_knowngene      | 574   | chr8  | - |
| uc010bme.2         | LOC727849          | UCSC_knowngene      | 2447  | chr15 | + |

|           |           |                                         |                       |
|-----------|-----------|-----------------------------------------|-----------------------|
| 41399565  | 41402288  | ATGGGTATGCACATTAAGGCTTAGG               | natural antisense     |
| 52233846  | 52234850  | AGGTGTGAGGCTGCGTTGTGTGCTA               | intergenic            |
| 134070693 | 134075403 | TGTTTGGCTCCGCTCTCTCCATGTC               | exon sense-overlappi  |
| 23579993  | 23580912  | CTAGCTAAATTAACATGTCATCATT               | intron sense-overlapp |
| 123731639 | 123736348 | TGTTTATACCCAGAAATTCTCTCCTC              | intergenic            |
| 50065414  | 50081390  | GAGACTCCCT(122769                       | exon sense-overlappi  |
| 50065414  | 50081390  | GAGACTCCCT(122769                       | exon sense-overlappi  |
| 16190548  | 16225923  | GCAATTTGCCCTTGAATCTTCCATA               | intergenic            |
| 194017423 | 194030593 | AACAGAACAGAT100131551                   | intergenic            |
| 30677314  | 30683005  | CTTCATCATGTAACCTTGAATAAA                | intergenic            |
| 30209388  | 30211034  | CGCTGCTCCAGCATCTAGGGCATA                | intergenic            |
| 62619491  | 62622708  | AGTAATGTTCCA(23642                      | bidirectional         |
| 62619491  | 62622708  | AGTAATGTTCCA(23642                      | bidirectional         |
| 62619491  | 62622708  | AGTAATGTTCCA(23642                      | bidirectional         |
| 97317422  | 97330409  | AGTTTTGGGATAGATAGAGGGTCC                | natural antisense     |
| 144821565 | 144824305 | GCCCCACAGGGACACCTGGTCGCC                | intergenic            |
| 23025204  | 23025956  | GAAGTGGGAGACTTTTTCCACTTCC               | natural antisense     |
| 64141510  | 64147264  | ACGGGTTTCTGTTCCAACGGTTGA                | intron sense-overlapp |
| 64141510  | 64147264  | ACGGGTTTCTGTTCCAACGGTTGA                | intron sense-overlapp |
| 52529198  | 52533951  | TGAGGAGAAGAT730101                      | intergenic            |
| 174255520 | 174255791 | GGAAATTCTATGTTGATTAGGAAA                | intergenic            |
| 40428335  | 40432581  | CCCACAACCTTTC100130899                  | intergenic            |
| 176762063 | 176768960 | GGGGGAAAATAGCCTCTCTGTTTGC               | intergenic            |
| 37802657  | 37853368  | AAATGTTATTGATGGAGGATTGACA               | intronic antisense    |
| 37802657  | 37853368  | AAATGTTATTGATGGAGGATTGACA               | intronic antisense    |
| 37802657  | 37853368  | AAATGTTATTGATGGAGGATTGACA               | intronic antisense    |
| 37802657  | 37853368  | AAATGTTATTGATGGAGGATTGACA               | intronic antisense    |
| 37802657  | 37853368  | AAATGTTATTGATGGAGGATTGACA               | intronic antisense    |
| 62620543  | 62621814  | CTAATTGAATGA(23642                      | intergenic            |
| 47802946  | 47806369  | TATAACAACAC(84847                       | intergenic            |
| 57456804  | 57463864  | GACTGAGGAAGCTCCATTTTCTTTG               | intronic antisense    |
| 57456804  | 57463864  | GACTGAGGAAGCTCCATTTTCTTTG               | intronic antisense    |
| 57456804  | 57463864  | GACTGAGGAAGCTCCATTTTCTTTG               | intronic antisense    |
| 72824304  | 72837517  | ATGCTATTCTCGGTTTCCCAATAAC               | intergenic            |
| 142184156 | 142191179 | GAAGGGGGGTGTCTAAATTTGAATA               | intron sense-overlapp |
| 44165408  | 44173012  | ACCTAAACAGTG(100132774                  | natural antisense     |
| 109092926 | 109094924 | TTTGGGAACAAA(641518                     | intergenic            |
| 224904214 | 224907185 | TCTTGTTTCTCTCTTGGAAGAAGTC               | intergenic            |
| 101142266 | 101146221 | CAAATATTCTCCTTTCTCTCCCTGT               | intergenic            |
| 41635277  | 41636423  | AAGATTTTGTATAAGGCATGACTCC               | intron sense-overlapp |
| 41635277  | 41636423  | AAGATTTTGTATAAGGCATGACTCC               | intron sense-overlapp |
| 41635277  | 41636423  | AAGATTTTGTATAAGGCATGACTCC               | intron sense-overlapp |
| 41635277  | 41636423  | AAGATTTTGTATAAGGCATGACTCC               | intron sense-overlapp |
| 41635277  | 41636423  | AAGATTTTGTATAAGGCATGACTCC               | intron sense-overlapp |
| 45022632  | 45026249  | TTCCTGAGCCAC(285958                     | intergenic            |
| 109541771 | 109545809 | GCTTCCACTCTTCTCTTAAAGGAAC               | intron sense-overlapp |
| 109541771 | 109545809 | GCTTCCACTCTTCTCTTAAAGGAAC               | intron sense-overlapp |
| 26496670  | 26497304  | TCTTCAGGCCATGTCAGGTAGAGGT               | natural antisense     |
| 23607801  | 23613245  | GGTAGGTAATTTACTTTCTATTGTAC              | intergenic            |
| 13100098  | 13101511  | GTATTTATCTGAACAGGATTTAATT               | intronic antisense    |
| 96216683  | 96444894  | ACTTTTGTAGGTCCATTTTCACTTC               | intronic antisense    |
| 71277046  | 71282120  | CGAGATAGGAGGCCATAATGTTTC                | bidirectional         |
| 71277046  | 71282120  | CGAGATAGGAGGCCATAATGTTTC                | bidirectional         |
| 90892188  | 90893536  | ATTGGAACACGAGCATTTCTCTCC                | intergenic            |
| 102880643 | 102894318 | TCACAATTATTATAGATACTACCTGC              | intergenic            |
| 139485009 | 139488173 | TAATTTTATGTATTTATAGTAGTTCT              | intergenic            |
| 37049238  | 37063962  | CTTCTGTTAGG(388796                      | intergenic            |
| 155434167 | 155437113 | AAATGGTCTCTATTA AAAAGCACGT              | exon sense-overlappi  |
| 99578384  | 99585158  | ATGATGGAAAGG(646282                     |                       |
| 99898410  | 99900574  | GTGGTAGAAAGAGCATCAAGTGAA                | intergenic            |
| 128240803 | 128241377 | TCONS_00015171 GTTAATACTATGTAACCCAGTGTT | intergenic            |
| 82944794  | 82975798  | ENST00000335068, AGCGGGTAGAGA(727849    | intergenic            |
|           |           | ENST00000412730                         |                       |
|           |           | ENST00000584686,                        |                       |
|           |           | ENST00000520928                         |                       |
|           |           | TCONS_00015171                          |                       |

|                 |             |                          |           |           |
|-----------------|-------------|--------------------------|-----------|-----------|
| NM_032336       | GIN54       | DNA replication con +    | 41386724  | 41402565  |
| NM_016201       | AMOTL2      | angiomotin-like prot-    | 134074189 | 134093406 |
| NM_019116       | UBFD1       | ubiquitin domain-cor +   | 23568861  | 23585710  |
| NM_152329       | LRR1        | leucine-rich repeat pr + | 50065414  | 50081390  |
| NM_203467       | LRR1        | leucine-rich repeat pr + | 50065414  | 50081390  |
| NM_001012662    | SLC3A2      | 4F2 cell-surface antiç + | 62623483  | 62656355  |
| NM_001012664    | SLC3A2      | 4F2 cell-surface antiç + | 62623483  | 62656355  |
| NM_002394       | SLC3A2      | 4F2 cell-surface antiç + | 62623483  | 62656355  |
| NM_003837       | FBP2        | fructose-1,6-bisphosç -  | 97321002  | 97356075  |
| ENST00000557595 | AE000662.92 | Uncharacterized prot +   | 23025533  | 23027939  |
| NM_001013746    | ZNF107      | zinc finger protein 1C + | 64126510  | 64171401  |
| NM_016220       | ZNF107      | zinc finger protein 1C + | 64126510  | 64171401  |
| NM_001146077    | CLDN14      | claudin-14 -             | 37832919  | 37948867  |
| NM_001146078    | CLDN14      | claudin-14 -             | 37832919  | 37915117  |
| NM_001146079    | CLDN14      | claudin-14 -             | 37832919  | 37852388  |
| NM_012130       | CLDN14      | claudin-14 -             | 37832919  | 37838739  |
| NM_144492       | CLDN14      | claudin-14 -             | 37832919  | 37852388  |
| NM_001077490    | GNAS        | protein ALEX alex +      | 57428035  | 57486250  |
| NM_016592       | GNAS        | protein ALEX NESP +      | 57414794  | 57486250  |
| NM_080425       | GNAS        | protein ALEX XLas +      | 57428035  | 57486250  |
| NM_001184       | ATR         | serine/threonine-prot -  | 142168076 | 142297668 |
| NM_014663       | KDM4A       | lysine-specific demet +  | 44115796  | 44171189  |
| NM_001243142    | NUSAP1      | nucleolar and spindle +  | 41624891  | 41673248  |
| NM_001243143    | NUSAP1      | nucleolar and spindle +  | 41624891  | 41673248  |
| NM_001243144    | NUSAP1      | nucleolar and spindle +  | 41624891  | 41673248  |
| NM_016359       | NUSAP1      | nucleolar and spindle +  | 41624891  | 41673248  |
| NM_018454       | NUSAP1      | nucleolar and spindle +  | 41624891  | 41673248  |
| NM_003362       | UNG         | uracil-DNA glycosyl +    | 109535922 | 109548798 |
| NM_080911       | UNG         | uracil-DNA glycosyl +    | 109535398 | 109548798 |
| NM_015871       | ZNF593      | zinc finger protein 5ç + | 26496387  | 26497364  |
| NM_018654       | GPRC5D      | G-protein coupled re-    | 13093708  | 13103318  |
| NM_177965       | C8orf37     | protein C8orf37 -        | 96257140  | 96281462  |
| ENST00000381250 | MAP3K9      | mitogen-activated pr-    | 71196652  | 71276223  |
| ENST00000555993 | MAP3K9      | mitogen-activated pr-    | 71196367  | 71276251  |
| ENST00000401694 | AC009403.2  | Uncharacterized prot -   | 155403924 | 155437095 |

|             |             |           |           |            |           |
|-------------|-------------|-----------|-----------|------------|-----------|
| 38.346584   | 5.421924    | 4.874714  | 2.560675  | 42.459198  | 39.224148 |
| 101.276245  | 26.176928   | 6.163773  | 4.95441   | 116.352974 | 157.01756 |
| 948.597348  | 271.151282  | 9.482673  | 8.321261  | 950.9462   | 790.03326 |
| 225.249573  | 68.273962   | 7.446281  | 6.392155  | 209.50456  | 187.21826 |
| 45.778558   | 11.386348   | 5.173988  | 3.447996  | 53.87906   | 41.580105 |
| 82.129146   | 22.172709   | 5.955969  | 4.681843  | 78.64638   | 60.25638  |
| 82.129146   | 22.172709   | 5.955969  | 4.681843  | 78.64638   | 60.25638  |
| 69.636726   | 21.954134   | 5.719344  | 4.529278  | 107.980804 | 81.9307   |
| 30.633928   | 6.496018    | 4.483418  | 2.830249  | 33.593613  | 13.687741 |
| 390.41185   | 46.369483   | 8.193381  | 5.788982  | 473.26617  | 429.57297 |
| 161.32528   | 38.447592   | 6.915627  | 5.583046  | 193.2512   | 216.84372 |
| 694.513735  | 144.442114  | 9.02138   | 7.500983  | 616.2554   | 535.3189  |
| 694.513735  | 144.442114  | 9.02138   | 7.500983  | 616.2554   | 535.3189  |
| 694.513735  | 144.442114  | 9.02138   | 7.500983  | 616.2554   | 535.3189  |
| 28.188751   | 5.106032    | 4.42453   | 2.474615  | 39.6495    | 24.88094  |
| 70.817035   | 14.038543   | 5.784984  | 4.040391  | 70.150826  | 74.297775 |
| 83.882273   | 17.8035     | 5.859638  | 4.305734  | 67.799034  | 21.56316  |
| 134.152983  | 49.222924   | 6.664172  | 5.568366  | 105.58398  | 78.981895 |
| 134.152983  | 49.222924   | 6.664172  | 5.568366  | 105.58398  | 78.981895 |
| 41.592472   | 12.434637   | 4.81124   | 3.710345  | 62.898933  | 81.01735  |
| 326.523374  | 40.942751   | 7.549849  | 5.134946  | 141.9045   | 51.098263 |
| 8357.976417 | 2414.464542 | 12.420485 | 11.052931 | 11182.865  | 4587.784  |
| 30.261497   | 7.478578    | 4.395568  | 3.15563   | 36.548855  | 31.95807  |
| 43.349562   | 7.609044    | 4.789141  | 3.083413  | 28.387394  | 6.421906  |
| 43.349562   | 7.609044    | 4.789141  | 3.083413  | 28.387394  | 6.421906  |
| 43.349562   | 7.609044    | 4.789141  | 3.083413  | 28.387394  | 6.421906  |
| 43.349562   | 7.609044    | 4.789141  | 3.083413  | 28.387394  | 6.421906  |
| 43.349562   | 7.609044    | 4.789141  | 3.083413  | 28.387394  | 6.421906  |
| 273.900922  | 66.240235   | 7.687612  | 6.303717  | 249.65894  | 203.15112 |
| 342.749572  | 74.790451   | 7.85138   | 6.490231  | 453.0212   | 208.04018 |
| 62.917038   | 9.800069    | 5.331793  | 3.536598  | 102.2072   | 21.943314 |
| 62.917038   | 9.800069    | 5.331793  | 3.536598  | 102.2072   | 21.943314 |
| 62.917038   | 9.800069    | 5.331793  | 3.536598  | 102.2072   | 21.943314 |
| 25.476924   | 8.268826    | 4.290323  | 3.187557  | 31.348707  | 26.133095 |
| 31.232662   | 8.543466    | 4.642914  | 3.285629  | 31.923254  | 24.571737 |
| 112.239556  | 35.344869   | 6.429165  | 5.299117  | 130.92502  | 108.21962 |
| 39.137176   | 11.688611   | 4.817162  | 3.644786  | 36.62326   | 21.82868  |
| 23.02673    | 8.23886     | 4.195821  | 3.151817  | 29.876583  | 22.012758 |
| 30.963471   | 10.03631    | 4.605071  | 3.588078  | 24.369322  | 26.916548 |
| 26.778072   | 6.984352    | 4.392765  | 2.873021  | 25.935007  | 35.378353 |
| 26.778072   | 6.984352    | 4.392765  | 2.873021  | 25.935007  | 35.378353 |
| 26.778072   | 6.984352    | 4.392765  | 2.873021  | 25.935007  | 35.378353 |
| 26.778072   | 6.984352    | 4.392765  | 2.873021  | 25.935007  | 35.378353 |
| 26.778072   | 6.984352    | 4.392765  | 2.873021  | 25.935007  | 35.378353 |
| 260.67223   | 58.786771   | 7.608777  | 6.206182  | 311.0595   | 377.47165 |
| 74.539217   | 21.757548   | 5.849956  | 4.698504  | 77.90099   | 92.87605  |
| 74.539217   | 21.757548   | 5.849956  | 4.698504  | 77.90099   | 92.87605  |
| 89.388226   | 16.608442   | 6.027199  | 4.32259   | 107.283585 | 164.75966 |
| 3179.451483 | 831.578155  | 11.152118 | 9.916348  | 3043.7583  | 2180.9128 |
| 44.520409   | 14.029717   | 5.025135  | 3.792019  | 45.789955  | 15.547912 |
| 455.803557  | 122.27024   | 8.420571  | 7.098767  | 586.08276  | 596.9191  |
| 259.009762  | 57.567185   | 7.637078  | 6.064982  | 258.89716  | 303.33902 |
| 259.009762  | 57.567185   | 7.637078  | 6.064982  | 258.89716  | 303.33902 |
| 23.283252   | 8.138231    | 4.192989  | 3.095847  | 24.955187  | 26.20568  |
| 20.826361   | 7.521871    | 4.017279  | 2.945373  | 29.357594  | 14.740099 |
| 1223.757463 | 267.476228  | 9.623347  | 8.363214  | 964.2818   | 429.96133 |
| 214.94165   | 50.373761   | 7.348822  | 5.972284  | 276.95325  | 307.85    |
| 669.159053  | 183.540222  | 8.855723  | 7.579672  | 453.6928   | 464.10175 |
| 1699.473867 | 216.327574  | 10.144627 | 7.984329  | 2197.2268  | 3286.032  |
| 24.435327   | 7.604752    | 4.244947  | 3.013983  | 19.94159   | 11.958449 |
| 28.480569   | 7.483895    | 4.421781  | 2.967859  | 30.952795  | 13.26432  |
| 196.90687   | 46.251555   | 7.087461  | 5.800474  | 203.5338   | 305.4457  |

|           |           |            |            |           |           |
|-----------|-----------|------------|------------|-----------|-----------|
| 22.39445  | 29.058714 | 46.488552  | 50.454445  | 4.9999995 | 4.9999995 |
| 42.362045 | 55.407097 | 123.162796 | 113.354996 | 37.56748  | 30.20021  |
| 939.5225  | 1132.9319 | 761.09753  | 1117.0527  | 218.34827 | 140.71465 |
| 215.40692 | 267.31552 | 192.20558  | 279.8466   | 71.3929   | 38.599205 |
| 52.731182 | 36.137543 | 43.91659   | 46.42687   | 16.591978 | 6.437701  |
| 61.006702 | 131.76216 | 55.060783  | 106.04247  | 15.64878  | 11.521231 |
| 61.006702 | 131.76216 | 55.060783  | 106.04247  | 15.64878  | 11.521231 |
| 67.0017   | 43.769245 | 54.28577   | 62.852135  | 29.17035  | 13.307381 |
| 46.66903  | 43.006596 | 12.689699  | 34.15689   | 4.9999995 | 6.9926248 |
| 475.91742 | 355.5979  | 239.13388  | 368.98276  | 48.71495  | 25.362728 |
| 125.89578 | 87.21835  | 179.48685  | 165.25578  | 32.732574 | 29.770746 |
| 650.9867  | 560.1162  | 854.59985  | 949.80536  | 153.5967  | 123.8743  |
| 650.9867  | 560.1162  | 854.59985  | 949.80536  | 153.5967  | 123.8743  |
| 650.9867  | 560.1162  | 854.59985  | 949.80536  | 153.5967  | 123.8743  |
| 33.995865 | 14.653258 | 25.068352  | 30.884592  | 5.327371  | 4.9999995 |
| 54.26663  | 60.394333 | 79.522415  | 86.27023   | 17.153742 | 9.348891  |
| 96.71833  | 147.0938  | 61.722385  | 108.39693  | 16.036451 | 7.6816006 |
| 111.28779 | 184.37915 | 140.39117  | 184.29391  | 17.319656 | 14.878519 |
| 111.28779 | 184.37915 | 140.39117  | 184.29391  | 17.319656 | 14.878519 |
| 34.424923 | 15.585321 | 24.35741   | 31.270897  | 13.51183  | 8.230274  |
| 242.79268 | 263.3071  | 674.1781   | 585.8596   | 39.807228 | 5.368586  |
| 16788.502 | 7489.656  | 3368.6875  | 6730.364   | 2800.4106 | 220.56935 |
| 12.077791 | 58.497173 | 11.397339  | 31.089756  | 7.061759  | 7.217812  |
| 46.956615 | 34.00279  | 75.258804  | 69.06986   | 10.31078  | 5.5131097 |
| 46.956615 | 34.00279  | 75.258804  | 69.06986   | 10.31078  | 5.5131097 |
| 46.956615 | 34.00279  | 75.258804  | 69.06986   | 10.31078  | 5.5131097 |
| 46.956615 | 34.00279  | 75.258804  | 69.06986   | 10.31078  | 5.5131097 |
| 46.956615 | 34.00279  | 75.258804  | 69.06986   | 10.31078  | 5.5131097 |
| 254.99585 | 199.90984 | 360.14798  | 375.5418   | 58.700558 | 49.772457 |
| 660.2279  | 367.86975 | 122.92342  | 244.41498  | 80.814545 | 41.42485  |
| 140.79819 | 37.404602 | 26.981482  | 48.16744   | 12.280589 | 7.203097  |
| 140.79819 | 37.404602 | 26.981482  | 48.16744   | 12.280589 | 7.203097  |
| 140.79819 | 37.404602 | 26.981482  | 48.16744   | 12.280589 | 7.203097  |
| 30.546158 | 35.528893 | 16.895689  | 12.409001  | 8.747339  | 5.928433  |
| 29.728642 | 42.371017 | 26.821178  | 31.980143  | 11.64052  | 9.451308  |
| 153.6301  | 94.133316 | 76.50125   | 110.02803  | 40.000526 | 11.87989  |
| 35.80666  | 85.3475   | 18.641802  | 36.575153  | 11.586388 | 4.9999995 |
| 17.932817 | 21.26649  | 23.006386  | 24.065348  | 9.883603  | 4.9999995 |
| 25.48452  | 47.508026 | 24.72563   | 36.77678   | 11.451948 | 7.8827586 |
| 16.991789 | 27.205101 | 24.363644  | 30.794537  | 7.754792  | 4.9999995 |
| 16.991789 | 27.205101 | 24.363644  | 30.794537  | 7.754792  | 4.9999995 |
| 16.991789 | 27.205101 | 24.363644  | 30.794537  | 7.754792  | 4.9999995 |
| 16.991789 | 27.205101 | 24.363644  | 30.794537  | 7.754792  | 4.9999995 |
| 16.991789 | 27.205101 | 24.363644  | 30.794537  | 7.754792  | 4.9999995 |
| 259.8496  | 252.8894  | 147.25548  | 215.50775  | 55.057762 | 69.13863  |
| 54.991272 | 71.91038  | 58.215515  | 91.341095  | 23.94478  | 14.00783  |
| 54.991272 | 71.91038  | 58.215515  | 91.341095  | 23.94478  | 14.00783  |
| 60.659023 | 61.773716 | 60.14555   | 81.70782   | 19.35994  | 15.036251 |
| 3565.5798 | 4561.8433 | 1914.1027  | 3810.512   | 985.9344  | 291.33533 |
| 65.346855 | 31.642105 | 53.493618  | 55.302006  | 15.479142 | 4.9999995 |
| 415.14035 | 365.02063 | 418.8744   | 352.7841   | 121.71369 | 54.331238 |
| 187.15033 | 218.76486 | 291.4744   | 294.4328   | 44.181477 | 28.136223 |
| 187.15033 | 218.76486 | 291.4744   | 294.4328   | 44.181477 | 28.136223 |
| 23.997967 | 30.977787 | 21.205189  | 12.3577    | 10.18545  | 4.9999995 |
| 19.538168 | 31.82493  | 13.169019  | 16.328358  | 8.349351  | 4.9999995 |
| 1123.7784 | 593.54395 | 2262.4993  | 1968.48    | 212.35837 | 137.04628 |
| 190.13249 | 175.28676 | 156.46242  | 182.96498  | 41.684006 | 40.99561  |
| 401.1977  | 1168.884  | 463.40067  | 1063.6774  | 193.05197 | 38.385315 |
| 1050.5646 | 674.5365  | 1517.9738  | 1470.5095  | 341.87225 | 328.78833 |
| 23.213627 | 35.133667 | 25.014297  | 31.350334  | 8.804812  | 4.9999995 |
| 39.239876 | 39.543625 | 14.743429  | 33.139366  | 13.249079 | 4.9999995 |
| 84.63601  | 87.40299  | 262.17834  | 238.24438  | 48.47775  | 28.890148 |

|           |            |           |            |            |            |
|-----------|------------|-----------|------------|------------|------------|
| 5.636218  | 6.0024424  | 4.9999995 | 5.892883   | 4.9473968  | 5.190097   |
| 27.936485 | 27.833132  | 12.982691 | 20.54157   | 6.4086394  | 7.0560155  |
| 280.1822  | 533.06635  | 167.58322 | 287.013    | 9.423069   | 9.293261   |
| 91.7607   | 77.67977   | 64.84669  | 65.36451   | 7.2576933  | 7.307643   |
| 28.1722   | 4.9999995  | 5.828055  | 6.288156   | 5.2838044  | 5.2682505  |
| 25.62019  | 23.64221   | 36.493366 | 20.110477  | 5.8434753  | 5.751268   |
| 25.62019  | 23.64221   | 36.493366 | 20.110477  | 5.8434753  | 5.751268   |
| 46.67867  | 9.450924   | 18.5047   | 14.61278   | 6.3068833  | 6.162426   |
| 4.9999995 | 11.527129  | 4.9999995 | 5.456355   | 4.6079326  | 3.8112924  |
| 56.77139  | 38.261692  | 70.36492  | 38.74122   | 8.40955    | 8.436878   |
| 42.993107 | 46.132587  | 40.48604  | 38.5705    | 7.1425095  | 7.502681   |
| 153.92876 | 109.223694 | 195.91153 | 130.1177   | 8.794905   | 8.754577   |
| 153.92876 | 109.223694 | 195.91153 | 130.1177   | 8.794905   | 8.754577   |
| 153.92876 | 109.223694 | 195.91153 | 130.1177   | 8.794905   | 8.754577   |
| 4.9999995 | 4.9999995  | 5.3088217 | 4.9999995  | 4.8487864  | 4.5926166  |
| 13.315861 | 23.212875  | 10.058029 | 11.14186   | 5.673632   | 6.030472   |
| 18.971788 | 35.13352   | 11.163542 | 17.8341    | 5.6234236  | 4.394413   |
| 31.620098 | 126.38692  | 36.201153 | 68.9312    | 6.2756343  | 6.113735   |
| 31.620098 | 126.38692  | 36.201153 | 68.9312    | 6.2756343  | 6.113735   |
| 24.320423 | 4.9999995  | 15.610723 | 7.9345737  | 5.5185785  | 6.146406   |
| 76.763374 | 12.78853   | 74.30777  | 36.62102   | 6.6983423  | 5.541128   |
| 5741.011  | 874.9513   | 3217.5818 | 1632.2632  | 12.999295  | 11.726     |
| 11.377839 | 5.787665   | 5.6066055 | 7.8197904  | 4.726695   | 4.925186   |
| 4.9999995 | 10.784961  | 4.9999995 | 9.045415   | 4.3749185  | 2.852024   |
| 4.9999995 | 10.784961  | 4.9999995 | 9.045415   | 4.3749185  | 2.852024   |
| 4.9999995 | 10.784961  | 4.9999995 | 9.045415   | 4.3749185  | 2.852024   |
| 4.9999995 | 10.784961  | 4.9999995 | 9.045415   | 4.3749185  | 2.852024   |
| 4.9999995 | 10.784961  | 4.9999995 | 9.045415   | 4.3749185  | 2.852024   |
| 68.193634 | 43.53294   | 117.759   | 59.48282   | 7.505351   | 7.4143014  |
| 121.30317 | 65.941864  | 77.62852  | 61.629757  | 8.347784   | 7.448058   |
| 8.500926  | 6.378087   | 13.411603 | 11.02611   | 6.228389   | 4.4207354  |
| 8.500926  | 6.378087   | 13.411603 | 11.02611   | 6.228389   | 4.4207354  |
| 8.500926  | 6.378087   | 13.411603 | 11.02611   | 6.228389   | 4.4207354  |
| 14.49966  | 5.5656476  | 4.9999995 | 9.871879   | 4.513104   | 4.6576047  |
| 4.9999995 | 4.9999995  | 10.38666  | 9.782307   | 4.5376577  | 4.575687   |
| 55.800827 | 25.587566  | 46.44363  | 32.356777  | 6.584625   | 6.539441   |
| 16.252779 | 12.080541  | 11.372201 | 13.839759  | 4.729383   | 4.412583   |
| 10.70723  | 6.3083735  | 11.284829 | 6.249128   | 4.447179   | 4.4252086  |
| 11.023401 | 12.62894   | 10.216929 | 7.013884   | 4.150207   | 4.6980534  |
| 12.005489 | 6.318772   | 5.827062  | 4.9999995  | 4.2387695  | 5.060999   |
| 12.005489 | 6.318772   | 5.827062  | 4.9999995  | 4.2387695  | 5.060999   |
| 12.005489 | 6.318772   | 5.827062  | 4.9999995  | 4.2387695  | 5.060999   |
| 12.005489 | 6.318772   | 5.827062  | 4.9999995  | 4.2387695  | 5.060999   |
| 12.005489 | 6.318772   | 5.827062  | 4.9999995  | 4.2387695  | 5.060999   |
| 41.37767  | 70.99175   | 54.433243 | 61.721573  | 7.8253846  | 8.267057   |
| 26.533016 | 16.976227  | 29.973701 | 19.109732  | 5.8314757  | 6.3266964  |
| 26.533016 | 16.976227  | 29.973701 | 19.109732  | 5.8314757  | 6.3266964  |
| 18.518906 | 17.373688  | 19.06758  | 10.294288  | 6.300123   | 7.1228595  |
| 1457.1542 | 537.0929   | 1080.4556 | 637.4965   | 11.090976  | 10.6769705 |
| 28.289206 | 14.00904   | 12.40685  | 8.994067   | 5.056939   | 3.978356   |
| 269.49377 | 94.09023   | 91.67079  | 102.32172  | 8.7197895  | 8.908517   |
| 49.66167  | 48.81603   | 105.51278 | 69.09493   | 7.5604796  | 7.9744473  |
| 49.66167  | 48.81603   | 105.51278 | 69.09493   | 7.5604796  | 7.9744473  |
| 14.394659 | 8.159953   | 5.433492  | 5.655833   | 4.1814556  | 4.661509   |
| 9.137138  | 4.9999995  | 4.9999995 | 12.644738  | 4.420042   | 3.9064555  |
| 262.4511  | 297.4592   | 417.55652 | 277.9859   | 9.439632   | 8.438746   |
| 49.286    | 55.195347  | 68.921745 | 46.159855  | 7.6626673  | 7.9930224  |
| 402.35672 | 146.72122  | 184.4818  | 136.24431  | 8.349809   | 8.549073   |
| 214.52908 | 180.15494  | 119.01688 | 113.603966 | 10.6263275 | 11.261673  |
| 4.9999995 | 13.129539  | 6.5129147 | 7.1812487  | 3.8582156  | 3.636282   |
| 7.46981   | 6.1250443  | 8.059437  | 4.9999995  | 4.4944496  | 3.7672367  |
| 66.10664  | 39.7824    | 58.33989  | 35.912502  | 7.215641   | 7.984416   |



|           |            |           |           |           |           |
|-----------|------------|-----------|-----------|-----------|-----------|
| 4.1713567 | 4.402366   | 5.3701468 | 5.1669183 | 2.3467326 | 2.4279919 |
| 5.0835905 | 5.408334   | 6.724544  | 6.3015146 | 5.467793  | 5.755429  |
| 9.506867  | 9.822046   | 9.311349  | 9.539445  | 8.018646  | 7.9854956 |
| 7.4336886 | 7.7448225  | 7.3527207 | 7.581115  | 6.3903785 | 6.111639  |
| 5.4017715 | 4.7421403  | 5.2964544 | 5.051507  | 4.284698  | 3.438599  |
| 5.621011  | 6.711897   | 5.5984983 | 6.209666  | 4.197416  | 4.315952  |
| 5.621011  | 6.711897   | 5.5984983 | 6.209666  | 4.197416  | 4.315952  |
| 5.758358  | 5.042064   | 5.579201  | 5.467133  | 5.096626  | 4.5372353 |
| 5.225091  | 5.014564   | 3.6059313 | 4.6356993 | 2.3467326 | 3.568541  |
| 8.545436  | 8.1492     | 7.6592255 | 7.9599986 | 5.840043  | 5.498396  |
| 6.65241   | 6.0924406  | 7.2588835 | 6.844835  | 5.264597  | 5.736408  |
| 8.981791  | 8.806364   | 9.480629  | 9.310017  | 7.5035105 | 7.801304  |
| 8.981791  | 8.806364   | 9.480629  | 9.310017  | 7.5035105 | 7.801304  |
| 8.981791  | 8.806364   | 9.480629  | 9.310017  | 7.5035105 | 7.801304  |
| 4.772266  | 3.30342    | 4.5342627 | 4.4958277 | 2.622869  | 2.4279919 |
| 5.44487   | 5.538499   | 6.110455  | 5.911976  | 4.337932  | 3.9997532 |
| 6.272367  | 6.8736258  | 5.7547174 | 6.239282  | 4.2347283 | 3.7014015 |
| 6.479357  | 7.2044687  | 6.9128895 | 6.998948  | 4.3526316 | 4.7061467 |
| 6.479357  | 7.2044687  | 6.9128895 | 6.998948  | 4.3526316 | 4.7061467 |
| 4.79185   | 3.4041388  | 4.493492  | 4.512973  | 3.984622  | 3.8092117 |
| 7.595459  | 7.725825   | 9.130125  | 8.608215  | 5.5509915 | 3.1578577 |
| 13.763353 | 12.518451  | 11.422207 | 12.093601 | 11.768271 | 8.6404    |
| 3.26634   | 5.4898167  | 3.460215  | 4.505154  | 3.0137167 | 3.6135645 |
| 5.2346973 | 4.646934   | 6.0281043 | 5.598165  | 3.592714  | 3.2001655 |
| 5.2346973 | 4.646934   | 6.0281043 | 5.598165  | 3.592714  | 3.2001655 |
| 5.2346973 | 4.646934   | 6.0281043 | 5.598165  | 3.592714  | 3.2001655 |
| 5.2346973 | 4.646934   | 6.0281043 | 5.598165  | 3.592714  | 3.2001655 |
| 5.2346973 | 4.646934   | 6.0281043 | 5.598165  | 3.592714  | 3.2001655 |
| 7.6596923 | 7.324397   | 8.236217  | 7.985715  | 6.1112947 | 6.4845138 |
| 9.001366  | 8.202094   | 6.7210536 | 7.387924  | 6.560937  | 6.2177825 |
| 6.813902  | 4.794995   | 4.6309633 | 5.1017733 | 3.8468306 | 3.6107388 |
| 6.813902  | 4.794995   | 4.6309633 | 5.1017733 | 3.8468306 | 3.6107388 |
| 6.813902  | 4.794995   | 4.6309633 | 5.1017733 | 3.8468306 | 3.6107388 |
| 4.625408  | 4.715929   | 3.9972217 | 3.2326677 | 3.339285  | 3.3143082 |
| 4.58448   | 4.991452   | 4.624325  | 4.543882  | 3.7698262 | 4.0166245 |
| 6.9314837 | 6.204856   | 6.052959  | 6.2616277 | 5.55792   | 4.360355  |
| 4.8454013 | 6.0602655  | 4.1275835 | 4.7277565 | 3.7632835 | 2.4279919 |
| 3.8473296 | 3.9040053  | 4.414177  | 4.1370273 | 3.5271208 | 2.4279919 |
| 4.360154  | 5.170717   | 4.5153484 | 4.7359467 | 3.747278  | 3.7405472 |
| 3.7680078 | 4.3030634  | 4.4942245 | 4.491528  | 3.1513758 | 2.4279919 |
| 3.7680078 | 4.3030634  | 4.4942245 | 4.491528  | 3.1513758 | 2.4279919 |
| 3.7680078 | 4.3030634  | 4.4942245 | 4.491528  | 3.1513758 | 2.4279919 |
| 3.7680078 | 4.3030634  | 4.4942245 | 4.491528  | 3.1513758 | 2.4279919 |
| 3.7680078 | 4.3030634  | 4.4942245 | 4.491528  | 3.1513758 | 2.4279919 |
| 7.688475  | 7.673708   | 6.9811416 | 7.216898  | 6.0179925 | 6.9610286 |
| 5.46651   | 5.8058276  | 5.675357  | 5.9938703 | 4.8245826 | 4.6186566 |
| 5.46651   | 5.8058276  | 5.675357  | 5.9938703 | 4.8245826 | 4.6186566 |
| 5.6122036 | 5.5730724  | 5.720251  | 5.834682  | 4.5112634 | 4.7243066 |
| 11.436981 | 11.8123665 | 10.60498  | 11.290435 | 10.260273 | 9.0494795 |
| 5.723614  | 4.5380025  | 5.55721   | 5.296691  | 4.1844497 | 2.4279919 |
| 8.354368  | 8.190673   | 8.448782  | 7.901298  | 7.1600614 | 6.6135163 |
| 7.226626  | 7.461958   | 7.9444704 | 7.654488  | 5.698433  | 5.6508336 |
| 7.226626  | 7.461958   | 7.9444704 | 7.654488  | 5.698433  | 5.6508336 |
| 4.278139  | 4.5076456  | 4.302038  | 3.227144  | 3.5741935 | 2.4279919 |
| 3.9668114 | 4.5466657  | 3.6559534 | 3.6077442 | 3.267405  | 2.4279919 |
| 9.75942   | 8.893606   | 10.850326 | 10.35835  | 7.9744473 | 7.9464073 |
| 7.249302  | 7.1291246  | 7.0700097 | 6.9888043 | 5.6152544 | 6.202302  |
| 8.299586  | 9.872683   | 8.596709  | 9.466481  | 7.83819   | 6.104165  |
| 9.662657  | 9.091095   | 10.295151 | 9.930856  | 8.683072  | 9.220763  |
| 4.2283254 | 4.7000003  | 4.5312595 | 4.5156016 | 3.350052  | 2.4279919 |
| 4.9789333 | 4.8841896  | 3.8108997 | 4.59498   | 3.9552395 | 2.4279919 |
| 6.0864935 | 6.094824   | 7.791039  | 7.3523517 | 5.833062  | 5.6912537 |

|           |           |           |           |
|-----------|-----------|-----------|-----------|
| 2.715229  | 2.6932654 | 2.3618152 | 2.8190138 |
| 4.8254213 | 5.001877  | 3.9755201 | 4.700419  |
| 8.075413  | 9.518299  | 7.627012  | 8.702703  |
| 6.4850082 | 6.604062  | 6.2869625 | 6.474881  |
| 4.8372645 | 2.3408759 | 2.8717132 | 2.9148262 |
| 4.702451  | 4.7459803 | 5.4637485 | 4.665508  |
| 4.702451  | 4.7459803 | 5.4637485 | 4.665508  |
| 5.5438776 | 3.3375847 | 4.477513  | 4.182831  |
| 2.350709  | 3.639562  | 2.3618152 | 2.714133  |
| 5.816333  | 5.4927983 | 6.4008884 | 5.685433  |
| 5.421285  | 5.7849503 | 5.611554  | 5.679484  |
| 7.214459  | 7.113854  | 7.8606377 | 7.51213   |
| 7.214459  | 7.113854  | 7.8606377 | 7.51213   |
| 7.214459  | 7.113854  | 7.8606377 | 7.51213   |
| 2.350709  | 2.3408759 | 2.7524924 | 2.352752  |
| 3.8096309 | 4.71585   | 3.6080103 | 3.7711673 |
| 4.295093  | 5.3637314 | 3.756932  | 4.482518  |
| 4.99756   | 7.349468  | 5.4526463 | 6.5517464 |
| 4.99756   | 7.349468  | 5.4526463 | 6.5517464 |
| 4.6291103 | 2.3408759 | 4.2364063 | 3.2618437 |
| 6.2306647 | 3.793397  | 6.4773726 | 5.599393  |
| 12.462249 | 10.25152  | 11.933474 | 11.261673 |
| 3.603805  | 2.6453981 | 2.8206    | 3.236695  |
| 2.350709  | 3.5373566 | 2.3618152 | 3.457717  |
| 2.350709  | 3.5373566 | 2.3618152 | 3.457717  |
| 2.350709  | 3.5373566 | 2.3618152 | 3.457717  |
| 2.350709  | 3.5373566 | 2.3618152 | 3.457717  |
| 2.350709  | 3.5373566 | 2.3618152 | 3.457717  |
| 6.069859  | 5.6892433 | 7.1297617 | 6.337627  |
| 6.881975  | 6.3487215 | 6.540354  | 6.391618  |
| 3.2137773 | 2.7745209 | 4.017525  | 3.756193  |
| 3.2137773 | 2.7745209 | 4.017525  | 3.756193  |
| 3.2137773 | 2.7745209 | 4.017525  | 3.756193  |
| 3.9239259 | 2.5957327 | 2.3618152 | 3.590277  |
| 2.350709  | 2.3408759 | 3.6582654 | 3.5774732 |
| 5.7922044 | 4.8677244 | 5.8065066 | 5.4099917 |
| 4.083551  | 3.7086086 | 3.7811992 | 4.104079  |
| 3.5202184 | 2.7601893 | 3.770302  | 2.9050775 |
| 3.5618496 | 3.774617  | 3.6313791 | 3.072796  |
| 3.6729438 | 2.7617857 | 2.8712776 | 2.352752  |
| 3.6729438 | 2.7617857 | 2.8712776 | 2.352752  |
| 3.6729438 | 2.7617857 | 2.8712776 | 2.352752  |
| 3.6729438 | 2.7617857 | 2.8712776 | 2.352752  |
| 3.6729438 | 2.7617857 | 2.8712776 | 2.352752  |
| 5.3677835 | 6.465655  | 6.031085  | 6.393545  |
| 4.7520566 | 4.2271276 | 5.182884  | 4.585715  |
| 4.7520566 | 4.2271276 | 5.182884  | 4.585715  |
| 4.2632356 | 4.262516  | 4.5175815 | 3.6566377 |
| 10.448406 | 9.529076  | 10.335355 | 9.875501  |
| 4.8438864 | 3.9367251 | 3.9091399 | 3.4499185 |
| 8.022054  | 6.8874693 | 6.7691593 | 7.140344  |
| 5.631933  | 5.87541   | 6.977507  | 6.555775  |
| 5.631933  | 5.87541   | 6.977507  | 6.555775  |
| 3.9140952 | 3.118308  | 2.7796426 | 2.7608507 |
| 3.3109074 | 2.3408759 | 2.3618152 | 3.9632397 |
| 7.983128  | 8.6677265 | 8.947453  | 8.660124  |
| 5.622583  | 6.0682335 | 6.373878  | 5.951454  |
| 8.608826  | 7.5716796 | 7.777078  | 7.578091  |
| 7.688899  | 7.8740253 | 7.145105  | 7.294107  |
| 2.350709  | 3.8357491 | 3.0129642 | 3.1064334 |
| 3.0482035 | 2.719315  | 3.303652  | 2.352752  |
| 6.024882  | 5.5517516 | 6.13182   | 5.570073  |

|                      |                    |                    |                  |           |                  |
|----------------------|--------------------|--------------------|------------------|-----------|------------------|
| ASHGA5P028446        | 0.004421434        | 0.042188865        | 3.2467649        | up        | noncoding        |
| ASHGA5P017214        | 0.029202051        | 0.106794485        | 2.5431592        | up        | noncoding        |
| ASHGA5P051050        | 0.028383917        | 0.105047356        | 6.7641415        | up        | noncoding        |
| ASHGA5P032626        | 0.002338349        | 0.031698104        | 3.2280776        | up        | noncoding        |
| ASHGA5P037745        | 8.48172E-05        | 0.008738697        | 9.3699558        | up        | noncoding        |
| ASHGA5P042602        | 0.000173619        | 0.011182026        | 4.2729367        | up        | noncoding        |
| ASHGA5P028691        | 0.048801115        | 0.143530748        | 4.4745479        | up        | noncoding        |
| ASHGA5P047753        | 0.049604516        | 0.144887709        | 2.094463         | up        | noncoding        |
| ASHGA5P025795        | 0.02633863         | 0.101175177        | 2.3222656        | up        | noncoding        |
| ASHGA5P025795        | 0.02633863         | 0.101175177        | 2.3222656        | up        | noncoding        |
| ASHGA5P025795        | 0.02633863         | 0.101175177        | 2.3222656        | up        | noncoding        |
| ASHGA5P020105        | 0.000287853        | 0.012492602        | 2.7145097        | up        | noncoding        |
| ASHGA5P057588        | 0.002105691        | 0.03028922         | 2.4917643        | up        | noncoding        |
| ASHGA5P017522        | 0.016281926        | 0.077996855        | 3.0939713        | up        | noncoding        |
| ASHGA5P029487        | 0.003343273        | 0.037382889        | 2.2295682        | up        | noncoding        |
| ASHGA5P018810        | 0.034280945        | 0.11696607         | 2.1755517        | up        | noncoding        |
| ASHGA5P017279        | 0.019795538        | 0.085917997        | 2.2896627        | up        | noncoding        |
| ASHGA5P017279        | 0.019795538        | 0.085917997        | 2.2896627        | up        | noncoding        |
| ASHGA5P017279        | 0.019795538        | 0.085917997        | 2.2896627        | up        | noncoding        |
| ASHGA5P026489        | 0.009040037        | 0.059313506        | 2.0415428        | up        | noncoding        |
| ASHGA5P043753        | 0.010861536        | 0.064472676        | 2.1864096        | up        | noncoding        |
| ASHGA5P043753        | 0.010861536        | 0.064472676        | 2.1864096        | up        | noncoding        |
| <b>ASHGA5P053561</b> | <b>0.000256899</b> | <b>0.012149764</b> | <b>4.08303</b>   | <b>up</b> | <b>noncoding</b> |
| ASHGA5P043890        | 0.001344929        | 0.024539537        | 3.2951689        | up        | noncoding        |
| ASHGA5P022417        | 0.003707134        | 0.039054649        | 2.0690161        | up        | noncoding        |
| ASHGA5P017022        | 0.000527702        | 0.015826428        | 3.784878         | up        | noncoding        |
| ASHGA5P034858        | 0.034607499        | 0.117709021        | 2.3411737        | up        | noncoding        |
| ASHGA5P053501        | 0.002815464        | 0.034198499        | 2.2536841        | up        | noncoding        |
| ASHGA5P050711        | 0.013832748        | 0.07198363         | 4.0626928        | up        | noncoding        |
| ASHGA5P020480        | 0.000593558        | 0.016411961        | 2.6207034        | up        | noncoding        |
| ASHGA5P029745        | 0.000680506        | 0.017403699        | 2.9842402        | up        | noncoding        |
| ASHGA5P033094        | 0.038926815        | 0.125823386        | 2.0480652        | up        | noncoding        |
| ASHGA5P035741        | 0.005457199        | 0.046970992        | 3.0999763        | up        | noncoding        |
| ASHGA5P019075        | 0.028958758        | 0.106241445        | 2.0828856        | up        | noncoding        |
| ASHGA5P019075        | 0.028958758        | 0.106241445        | 2.0828856        | up        | noncoding        |
| ASHGA5P022303        | 0.026519373        | 0.101666408        | 4.1805088        | up        | noncoding        |
| ASHGA5P028530        | 0.048395801        | 0.142802321        | 3.0272709        | up        | noncoding        |
| ASHGA5P046103        | 0.003150924        | 0.036407477        | 2.5872999        | up        | noncoding        |
| ASHGA5P046935        | 0.001926203        | 0.029259988        | 4.4255155        | up        | noncoding        |
| ASHGA5P027431        | 0.004445865        | 0.042328642        | 2.9086867        | up        | noncoding        |
| <b>ASHGA5P045031</b> | <b>2.33197E-06</b> | <b>0.00231943</b>  | <b>6.830869</b>  | <b>up</b> | <b>noncoding</b> |
| ASHGA5P028942        | 0.04581485         | 0.13789067         | 2.8051289        | up        | noncoding        |
| ASHGA5P025990        | 0.000109855        | 0.009555212        | 2.7017327        | up        | noncoding        |
| ASHGA5P025990        | 0.000109855        | 0.009555212        | 2.7017327        | up        | noncoding        |
| ASHGA5P051881        | 0.006124007        | 0.049942924        | 2.8350782        | up        | noncoding        |
| ASHGA5P023526        | 0.001093341        | 0.022343136        | 2.5811847        | up        | noncoding        |
| ASHGA5P032428        | 0.00818838         | 0.056791621        | 2.0399259        | up        | noncoding        |
| ASHGA5P022831        | 0.004450435        | 0.04234886         | 4.0517582        | up        | noncoding        |
| ASHGA5P045066        | 0.033383282        | 0.115144552        | 3.3549586        | up        | noncoding        |
| ASHGA5P057743        | 0.004677609        | 0.043513602        | 2.2120224        | up        | noncoding        |
| <b>ASHGA5P045032</b> | <b>0.000101021</b> | <b>0.009142535</b> | <b>2.1340762</b> | <b>up</b> | <b>noncoding</b> |
| ASHGA5P019079        | 0.016746069        | 0.078875667        | 2.0789575        | up        | noncoding        |
| ASHGA5P019079        | 0.016746069        | 0.078875667        | 2.0789575        | up        | noncoding        |
| ASHGA5P018367        | 0.012112781        | 0.067436516        | 2.3783779        | up        | noncoding        |
| ASHGA5P018367        | 0.012112781        | 0.067436516        | 2.3783779        | up        | noncoding        |
| ASHGA5P037802        | 0.040856691        | 0.129143254        | 2.0679495        | up        | noncoding        |
| ASHGA5P037802        | 0.040856691        | 0.129143254        | 2.0679495        | up        | noncoding        |
| ASHGA5P037802        | 0.040856691        | 0.129143254        | 2.0679495        | up        | noncoding        |
| ASHGA5P037802        | 0.040856691        | 0.129143254        | 2.0679495        | up        | noncoding        |
| ASHGA5P042471        | 0.009147914        | 0.059552152        | 3.5379627        | up        | noncoding        |
| ASHGA5P055865        | 0.001132704        | 0.022643498        | 2.2042473        | up        | noncoding        |
| ASHGA5P055865        | 0.001132704        | 0.022643498        | 2.2042473        | up        | noncoding        |

|                        |               |                     |            |             |          |
|------------------------|---------------|---------------------|------------|-------------|----------|
| ENST00000444744        | RP11-428O18.4 | GENCODE             | 420        | chr13       | -        |
| ENST00000438934        | DGCR5         | GENCODE             | 5492       | chr22       | +        |
| uc002ybl.2             | AX747739      | UCSC_knowngene      | 2054       | chr20       | +        |
| ENST00000533232        | AC005152.2    | GENCODE             | 1739       | chr17       | -        |
| ENST00000422971        | CTA-941F9.9   | GENCODE             | 548        | chr22       | -        |
| TCONS_00014546         | XLOC_006923   | LincRNAs identified | 4060       | chr8        | +        |
| NR_047495              | LINC00565     | RefSeq              | 2494       | chr13       | -        |
| ENST00000448347        | RP11-282I1.1  | GENCODE             | 831        | chr10       | +        |
| NR_037930              | SLMO2-ATP5E   | RefSeq              | 768        | chr20       | -        |
| NR_037930              | SLMO2-ATP5E   | RefSeq              | 768        | chr20       | -        |
| NR_037930              | SLMO2-ATP5E   | RefSeq              | 768        | chr20       | -        |
| ENST00000508286        | LEF1-AS1      | GENCODE             | 444        | chr4        | +        |
| TCONS_00019456         | XLOC_009265   | LincRNAs identified | 639        | chr11       | +        |
| ENST00000442687        | AC034228.7    | pseudogene          | 1578       | chr5        | -        |
| ENST00000555350        | RP11-572M18.1 | GENCODE             | 470        | chr14       | +        |
| ENST00000457870        | AC016700.3    | GENCODE             | 501        | chr2        | -        |
| ENST00000439622        | RP3-323P24.3  | GENCODE             | 665        | chrX        | +        |
| ENST00000439622        | RP3-323P24.3  | GENCODE             | 665        | chrX        | +        |
| ENST00000439622        | RP3-323P24.3  | GENCODE             | 665        | chrX        | +        |
| CN412465               |               | LincRNAs identified | 563        | chr6        | -        |
| uc003ufr.3             | BC090058      | UCSC_knowngene      | 1983       | chr7        | +        |
| uc003ufr.3             | BC090058      | UCSC_knowngene      | 1983       | chr7        | +        |
| <b>ENST00000517790</b> | <b>PVT1</b>   | <b>GENCODE</b>      | <b>599</b> | <b>chr8</b> | <b>+</b> |
| ENST00000478818        | RP11-155G14.5 | pseudogene          | 450        | chr7        | +        |
| ENST00000556361        | RP11-72M17.1  | GENCODE             | 442        | chr14       | -        |
| ENST00000436764        | RP4-564F22.2  | GENCODE             | 973        | chr20       | -        |
| ENST00000450467        | AC097517.2    | GENCODE             | 358        | chr2        | -        |
| ENST00000518613        | KB-1608C10.2  | GENCODE             | 1203       | chr8        | -        |
| ENST00000447538        | HOXD-AS1      | GENCODE             | 558        | chr2        | -        |
| ENST00000514368        | RP11-434D9.1  | GENCODE             | 756        | chr5        | +        |
| ENST00000435624        | C14orf63      | GENCODE             | 448        | chr14       | +        |
| ENST00000433734        | RP5-1065P14.2 | GENCODE             | 599        | chr1        | -        |
| uc002rdd.2             | FLJ12334      | UCSC_knowngene      | 2509       | chr2        | +        |
| NR_033201              | HOXB-AS3      | RefSeq              | 570        | chr17       | +        |
| NR_033201              | HOXB-AS3      | RefSeq              | 570        | chr17       | +        |
| ENST00000554149        | RP11-1085N6.5 | GENCODE             | 621        | chr14       | -        |
| TCONS_00009837         | XLOC_004253   | LincRNAs identified | 324        | chr5        | +        |
| ENST00000438499        | RP11-1M18.1   | GENCODE             | 517        | chrX        | -        |
| uc001jtm.3             | BC069792      | UCSC_knowngene      | 632        | chr10       | -        |
| ENST00000546601        | RP11-186F10.2 | GENCODE             | 527        | chr12       | -        |
| <b>ENST00000522875</b> | <b>PVT1</b>   | <b>GENCODE</b>      | <b>922</b> | <b>chr8</b> | <b>+</b> |
| ENST00000421423        | LINC00403     | GENCODE             | 545        | chr13       | +        |
| NR_048557              | TSN           | RefSeq              | 3217       | chr2        | +        |
| NR_048557              | TSN           | RefSeq              | 3217       | chr2        | +        |
| ENST00000512092        | FAM86EP       | GENCODE             | 462        | chr4        | -        |
| ENST00000583052        | RP11-583F2.1  | GENCODE             | 599        | chr17       | +        |
| ENST00000560400        | RP11-156E6.1  | GENCODE             | 2930       | chr17       | -        |
| ENST00000563602        | RP11-44F21.5  | GENCODE             | 345        | chr4        | -        |
| ENST00000439341        | RP5-858B6.3   | GENCODE             | 794        | chr1        | +        |
| TCONS_00021722         | XLOC_010305   | LincRNAs identified | 206        | chr13       | +        |
| <b>ENST00000512617</b> | <b>PVT1</b>   | <b>GENCODE</b>      | <b>383</b> | <b>chr8</b> | <b>+</b> |
| NR_024250              | FAM86JP       | RefSeq              | 1970       | chr3        | +        |
| NR_024250              | FAM86JP       | RefSeq              | 1970       | chr3        | +        |
| NR_033963              | FLJ44511      | RefSeq              | 3506       | chr7        | +        |
| NR_033963              | FLJ44511      | RefSeq              | 3506       | chr7        | +        |
| ENST00000431090        | AC000068.5    | GENCODE             | 2097       | chr22       | +        |
| ENST00000431090        | AC000068.5    | GENCODE             | 2097       | chr22       | +        |
| ENST00000431090        | AC000068.5    | GENCODE             | 2097       | chr22       | +        |
| ENST00000431090        | AC000068.5    | GENCODE             | 2097       | chr22       | +        |
| ENST00000448327        | RP11-345L23.1 | GENCODE             | 566        | chr6        | +        |
| uc001vtl.1             | AK126278      | UCSC_knowngene      | 1939       | chr13       | +        |
| uc001vtl.1             | AK126278      | UCSC_knowngene      | 1939       | chr13       | +        |

|           |           |                  |                                        |                       |
|-----------|-----------|------------------|----------------------------------------|-----------------------|
| 27810418  | 27810948  |                  | GGTTGTCACCTGGAAGTTCCTGAAGT             | intergenic            |
| 18958026  | 18982141  |                  | GAAGAAAAAGTGCTTAGGTAGAGG               | intergenic            |
| 58713536  | 58897314  | uc010gjw.2       | TTTGCGTTTCAGATGCTCCCAGGCT              | intergenic            |
| 70076078  | 70116934  |                  | TAACTCACAACCTGGTGTCTCATAA              | bidirectional         |
| 46000311  | 46001501  |                  | TGTCCACACAAGACTTTAATAAAAT              | intergenic            |
| 128938354 | 128943402 |                  | TGGGTTGTCATCACAGTTGACTTAG              | intergenic            |
| 114629486 | 114631964 | TCONS_00022133   | ACTTAGCTTCCC^100861555                 | intergenic            |
| 125115965 | 125277224 |                  | GTTGCCAGAGTGAAATCCCCAGAC               | intergenic            |
| 57603732  | 57617901  |                  | TTCGGAGCACGT(100533975                 | exon sense-overlappi  |
| 57603732  | 57617901  |                  | TTCGGAGCACGT(100533975                 | exon sense-overlappi  |
| 57603732  | 57617901  |                  | TTCGGAGCACGT(100533975                 | exon sense-overlappi  |
| 109094574 | 109097586 |                  | GGTGGATATGTG(641518                    | intergenic            |
| 104071252 | 104112755 |                  | AGAGTGGAAGCATCTCTCCAATTTG              | intergenic            |
| 131142923 | 131281198 |                  | GTGCTTCAAATTCAGAATCAGTTATAGATAATGCAGCT |                       |
| 28103330  | 28105875  |                  | ATATTAATGTCTCAGTCCCGAGAAA              | intergenic            |
| 70321028  | 70322126  |                  | GTGGTGGTCATGTGTTTGTCAACCT              | intergenic            |
| 57148094  | 57153676  |                  | GGAGTTGGAACAGAGAAATTCACT^              | bidirectional         |
| 57148094  | 57153676  |                  | GGAGTTGGAACAGAGAAATTCACT^              | bidirectional         |
| 57148094  | 57153676  |                  | GGAGTTGGAACAGAGAAATTCACT^              | bidirectional         |
| 37103028  | 37103592  |                  | TAAAATTAGAAGTACTTTCAGTAC               | intergenic            |
| 76178657  | 76182447  |                  | CTTTCTTATGTGACTCTAAAGGTCA/             | intron sense-overlapp |
| 76178657  | 76182447  |                  | CTTTCTTATGTGACTCTAAAGGTCA/             | intron sense-overlapp |
| 128807999 | 128903178 |                  | TCCTGTGGTCAT^5820                      | intergenic            |
| 128106616 | 128109225 | NM_001144933, NM | CAAATGCTCAAGAAAAAGCAGACTTGTATAGTGGCCG/ |                       |
| 66679527  | 66963043  |                  | GGAGGAGGAATTCTTGGCTAAGAGT              | intergenic            |
| 37049234  | 37063976  | NR_015366, NR_02 | ATCTGCGTGGGTCTCAGCCTTAGAT              | intergenic            |
| 6789237   | 6790375   | ENST00000415657, | CTACATTTGCAGCATCTCCAAGTTT              | intergenic            |
| 95804510  | 95806064  |                  | CTGCCTATATACACAGAAAGTAAAT              | natural antisense     |
| 177041107 | 177042812 | ENST00000456876, | AGGGGCCCGGGG401022                     | intergenic            |
| 66915618  | 67093432  |                  | GGAGCTTTCCCTTGTGAAGTGAAAG              | intergenic            |
| 97409915  | 97411731  |                  | GAAACTCCATGTTACCAGCATGTTA              | intergenic            |
| 229228561 | 229230652 |                  | CTTAGCGTGAGCCTGGGATATGCAT              | intergenic            |
| 20068614  | 20077296  | uc002rde.2       | TGAAGAGTGAAA400946                     | intergenic            |
| 46667822  | 46683774  |                  | TCCAGTAAGAAG'404266                    | intronic antisense    |
| 46667822  | 46683774  |                  | TCCAGTAAGAAG'404266                    | intronic antisense    |
| 57284287  | 57360066  |                  | AGAAGTTTGGCAGACACTTCCGACG              | intergenic            |
| 2268284   | 2278578   |                  | GGAATTTGTTGAGGGAATTTGTATT              | intergenic            |
| 6585905   | 6639585   |                  | ATTCCTTTCTGGGCAAATCTAAACC              | intergenic            |
| 74884658  | 74885290  |                  | GAACAACACAGAAAAATGCCAA                 | natural antisense     |
| 71976072  | 71977632  |                  | CAAATTCCTTGTGCTCTAGCTTTCT              | natural antisense     |
| 129001506 | 129108902 |                  | GCCAACAGAGAT^5820                      | intergenic            |
| 112761432 | 112762329 |                  | TAGTGCAACCAA(100505996                 | intergenic            |
| 122513120 | 122525428 | NR_048559        | CATCCGAGAGAT'7247                      | exon sense-overlappi  |
| 122513120 | 122525428 | NR_048559        | CATCCGAGAGAT'7247                      | exon sense-overlappi  |
| 3949631   | 3956770   |                  | CTTTTTAAAGGCAGTAATCGTTCTG              | intergenic            |
| 62926266  | 62930321  |                  | GAACCTATGGATTGACCTTTGTAAA              | intergenic            |
| 40004769  | 40007699  |                  | GTTTTATGTTTCTGAAGCTATCTTGT             | intergenic            |
| 76007246  | 76008878  |                  | AGATTCTAAGGTGGAAAATGAAGCA              | intergenic            |
| 231010591 | 231014761 |                  | CATTAGCCAAAGCTCCGGGACTTGG              | intergenic            |
| 23507414  | 23508772  |                  | AGAAAAGCGGCCCCACCTCTGCTG               | intergenic            |
| 129001429 | 129082518 | ENST00000521600  | TTGTCAGTTAAG^5820                      | intergenic            |
| 125635443 | 125648867 | ENST00000427587, | ACCGAGCTAGGC(100125556                 | natural antisense     |
| 125635443 | 125648867 | ENST00000427587, | ACCGAGCTAGGC(100125556                 | natural antisense     |
| 560027    | 564869    |                  | TGCAACCTCGAA.441307                    | bidirectional         |
| 560027    | 564869    |                  | TGCAACCTCGAA.441307                    | bidirectional         |
| 19435415  | 19437628  |                  | TTCACTAAGGAGCCAGTTATGTCCA              | natural antisense     |
| 19435415  | 19437628  |                  | TTCACTAAGGAGCCAGTTATGTCCA              | natural antisense     |
| 19435415  | 19437628  |                  | TTCACTAAGGAGCCAGTTATGTCCA              | natural antisense     |
| 19435415  | 19437628  |                  | TTCACTAAGGAGCCAGTTATGTCCA              | natural antisense     |
| 53493177  | 53496192  |                  | CGAAGCTTTTGAAGGTTTAAAGGATC             | intergenic            |
| 113888345 | 113890284 |                  | TGTTTGTAAAGTTCCAGAATATCTT/             | exon sense-overlappi  |
| 113888345 | 113890284 |                  | TGTTTGTAAAGTTCCAGAATATCTT/             | exon sense-overlappi  |

|              |       |                          |          |          |
|--------------|-------|--------------------------|----------|----------|
| NM_000346    | SOX9  | transcription factor S + | 70117160 | 70122560 |
| NM_001256403 | SLMO2 | protein slowmo hom -     | 57608199 | 57617901 |
| NM_006886    | ATP5E | ATP synthase subuni -    | 57603732 | 57607422 |
| NM_016045    | SLMO2 | protein slowmo hom -     | 57608199 | 57617901 |

TGTGAGATTTTACTTGCTGAGA

|                 |        |                        |          |          |
|-----------------|--------|------------------------|----------|----------|
| NM_001006681    | SPIN2B | spindlin-2B -          | 57146114 | 57147979 |
| NM_001006682    | SPIN2B | spindlin-2B -          | 57146114 | 57147979 |
| NM_001006683    | SPIN2B | spindlin-2B -          | 57146114 | 57147979 |
| ENST00000419923 | UPK3B  | uroplakin 3B [Source + | 76139744 | 76648340 |
| ENST00000443097 | UPK3B  | uroplakin 3B [Source + | 76139744 | 76648340 |

ATGCAACTACTATTAACAACAT

|           |         |                       |          |          |
|-----------|---------|-----------------------|----------|----------|
| NM_181787 | DPY19L4 | protein dpy-19 homo + | 95732102 | 95806076 |
|-----------|---------|-----------------------|----------|----------|

|           |       |                      |          |          |
|-----------|-------|----------------------|----------|----------|
| NM_002147 | HOXB5 | homeobox protein H - | 46668618 | 46671103 |
| NM_018952 | HOXB6 | homeobox protein H - | 46673098 | 46682334 |

|           |        |                         |          |          |
|-----------|--------|-------------------------|----------|----------|
| NM_015901 | NUDT13 | nucleoside diphosph +   | 74870209 | 74891581 |
| NM_003667 | LGR5   | leucine-rich repeat-c + | 71833812 | 71978621 |

|              |     |                      |           |           |
|--------------|-----|----------------------|-----------|-----------|
| NM_001261401 | TSN | translin isoform 2 + | 122513120 | 122525428 |
| NM_004622    | TSN | translin isoform 1 + | 122513120 | 122525428 |

|              |          |                         |           |           |
|--------------|----------|-------------------------|-----------|-----------|
| NM_001015050 | ALG1L    | putative glycosyltran - | 125648117 | 125655887 |
| NM_001195223 | ALG1L    | putative glycosyltran - | 125648117 | 125655887 |
| NM_002607    | PDGFA    | platelet-derived grow - | 536896    | 559481    |
| NM_033023    | PDGFA    | platelet-derived grow - | 536896    | 559481    |
| NM_001035247 | UFD1L    | ubiquitin fusion degr - | 19437463  | 19466738  |
| NM_001166242 | C22orf39 | UPF0545 protein C2 -    | 19428409  | 19435755  |
| NM_005659    | UFD1L    | ubiquitin fusion degr - | 19437463  | 19466738  |
| NM_173793    | C22orf39 | UPF0545 protein C2 -    | 19430672  | 19435755  |
| NM_001008895 | CUL4A    | cullin-4A isoform 1 +   | 113863930 | 113919392 |
| NM_003589    | CUL4A    | cullin-4A isoform 2 +   | 113863085 | 113919392 |

|                   |                  |                 |                 |                  |                  |
|-------------------|------------------|-----------------|-----------------|------------------|------------------|
| 92.052497         | 16.179842        | 5.937141        | 4.238138        | 43.07636         | 39.61487         |
| 88.7968           | 18.514298        | 5.828093        | 4.481472        | 63.019043        | 18.740238        |
| 20272.5755        | 4333.402903      | 13.566453       | 10.808547       | 21746.863        | 23993.293        |
| 71.423709         | 12.953819        | 5.652237        | 3.961561        | 73.159996        | 26.882257        |
| 79.150215         | 5.698624         | 5.794701        | 2.566659        | 109.114685       | 50.699493        |
| 381.061872        | 55.539379        | 8.183943        | 6.088715        | 358.8113         | 408.39392        |
| 629.482038        | 189.41634        | 8.74226         | 6.580518        | 682.2636         | 757.8183         |
| 37.526759         | 10.035966        | 4.640247        | 3.573667        | 31.359049        | 49.687874        |
| 851.0604          | 230.629612       | 9.272061        | 8.056528        | 936.81305        | 902.5186         |
| 851.0604          | 230.629612       | 9.272061        | 8.056528        | 936.81305        | 902.5186         |
| 851.0604          | 230.629612       | 9.272061        | 8.056528        | 936.81305        | 902.5186         |
| 78.516204         | 19.992049        | 5.75598         | 4.315289        | 65.97149         | 16.099607        |
| 28.094792         | 8.402815         | 4.472924        | 3.155756        | 38.6706          | 23.453745        |
| 44.245145         | 9.573393         | 5.045115        | 3.415655        | 35.165302        | 17.85141         |
| 117.483724        | 34.829854        | 6.494049        | 5.337285        | 151.73264        | 152.0191         |
| 730.221017        | 222.749642       | 9.049092        | 7.927711        | 823.33954        | 944.7433         |
| 43.281816         | 15.676834        | 5.065365        | 3.87023         | 53.955082        | 38.68104         |
| 43.281816         | 15.676834        | 5.065365        | 3.87023         | 53.955082        | 38.68104         |
| 43.281816         | 15.676834        | 5.065365        | 3.87023         | 53.955082        | 38.68104         |
| 391.253815        | 107.52869        | 7.998314        | 6.968654        | 323.8665         | 640.8166         |
| 581.362942        | 168.53195        | 8.73475         | 7.606187        | 585.88794        | 576.1907         |
| 581.362942        | 168.53195        | 8.73475         | 7.606187        | 585.88794        | 576.1907         |
| <b>57.142486</b>  | <b>9.386562</b>  | <b>5.495375</b> | <b>3.465735</b> | <b>63.995094</b> | <b>60.12333</b>  |
| 199.565593        | 40.718721        | 7.269684        | 5.549331        | 203.73795        | 258.30997        |
| 324.957845        | 90.766199        | 7.85143         | 6.802485        | 392.51212        | 544.60254        |
| 1452.62605        | 226.92445        | 10.06653        | 8.146283        | 1639.101         | 2070.9814        |
| 34.354617         | 10.941639        | 4.73669         | 3.509458        | 24.151676        | 43.88023         |
| 54.508398         | 16.457833        | 5.376218        | 4.203932        | 45.96606         | 25.795753        |
| 1032.106777       | 168.222714       | 9.201204        | 7.178768        | 1229.6658        | 2406.4534        |
| 35.522207         | 8.868293         | 4.751049        | 3.361095        | 31.792948        | 20.17467         |
| 205.241427        | 42.713142        | 7.262727        | 5.685363        | 230.62083        | 261.35626        |
| 36.063745         | 14.530002        | 4.802902        | 3.76864         | 31.554264        | 30.917192        |
| 79.695651         | 19.388436        | 5.927877        | 4.29562         | 69.39966         | 48.691658        |
| 211.710322        | 54.320071        | 7.129558        | 6.070974        | 332.72296        | 435.64285        |
| 211.710322        | 54.320071        | 7.129558        | 6.070974        | 332.72296        | 435.64285        |
| 1097.109872       | 276.221219       | 9.591495        | 7.527817        | 1164.9069        | 1228.8011        |
| 405.508108        | 47.816389        | 7.478057        | 5.880039        | 699.72144        | 81.78328         |
| 33.522611         | 8.491917         | 4.703125        | 3.331677        | 39.370308        | 36.06559         |
| 3300.916433       | 442.749393       | 11.258552       | 9.112706        | 3710.3435        | 3756.004         |
| 47.498355         | 10.217536        | 5.082805        | 3.542437        | 41.017826        | 34.143314        |
| <b>213.040258</b> | <b>20.219782</b> | <b>7.348211</b> | <b>4.576142</b> | <b>202.66965</b> | <b>138.64699</b> |
| 61.795269         | 11.687447        | 4.836374        | 3.348307        | 28.780241        | 10.808602        |
| 639.429413        | 149.070853       | 8.929453        | 7.495569        | 679.4323         | 577.71204        |
| 639.429413        | 149.070853       | 8.929453        | 7.495569        | 679.4323         | 577.71204        |
| 521.633262        | 101.915206       | 8.434606        | 6.931218        | 710.08014        | 1078.02          |
| 147.542285        | 33.871544        | 6.729295        | 5.361261        | 93.37459         | 74.8396          |
| 6291.67625        | 1737.46165       | 12.090801       | 11.062284       | 6593.3857        | 3724.111         |
| 278.162303        | 49.528168        | 7.696144        | 5.677596        | 300.5157         | 402.17194        |
| 37.766059         | 6.692404         | 4.704015        | 2.95772         | 32.733116        | 9.8561125        |
| 1786.078183       | 467.66869        | 10.358265       | 9.212899        | 1712.5779        | 1152.4476        |
| <b>13.682226</b>  | <b>5</b>         | <b>3.457091</b> | <b>2.363479</b> | <b>13.708798</b> | <b>15.768819</b> |
| 551.13411         | 171.550489       | 8.701115        | 7.645255        | 514.744          | 609.8299         |
| 551.13411         | 171.550489       | 8.701115        | 7.645255        | 514.744          | 609.8299         |
| 54.682733         | 13.404414        | 5.264583        | 4.014605        | 35.527145        | 32.059284        |
| 54.682733         | 13.404414        | 5.264583        | 4.014605        | 35.527145        | 32.059284        |
| 430.960457        | 148.904062       | 8.312563        | 7.264362        | 349.16574        | 294.6756         |
| 430.960457        | 148.904062       | 8.312563        | 7.264362        | 349.16574        | 294.6756         |
| 430.960457        | 148.904062       | 8.312563        | 7.264362        | 349.16574        | 294.6756         |
| 430.960457        | 148.904062       | 8.312563        | 7.264362        | 349.16574        | 294.6756         |
| 79.787322         | 15.742435        | 5.58562         | 3.762702        | 131.18266        | 71.38567         |
| 796.493175        | 216.516387       | 9.212718        | 8.072432        | 749.3657         | 552.5786         |
| 796.493175        | 216.516387       | 9.212718        | 8.072432        | 749.3657         | 552.5786         |

|                  |                  |                  |                  |                  |                  |
|------------------|------------------|------------------|------------------|------------------|------------------|
| 45.352417        | 106.784386       | 151.88025        | 165.6067         | 13.730569        | 8.614886         |
| 74.1839          | 56.544968        | 164.49005        | 155.8026         | 20.612534        | 11.59505         |
| 13938.793        | 2772.564         | 31346.59         | 27837.35         | 4372.5444        | 388.9493         |
| 104.38361        | 114.8205         | 30.667887        | 78.628006        | 14.046481        | 8.582743         |
| 163.13722        | 47.349182        | 46.893322        | 57.70739         | 4.9999995        | 4.9999995        |
| 290.92944        | 407.01703        | 348.7745         | 472.44504        | 56.960434        | 72.91756         |
| 399.0864         | 199.51213        | 983.1567         | 755.0551         | 228.23486        | 30.191608        |
| 4.9999995        | 50.731712        | 35.306522        | 53.075397        | 9.575189         | 7.413819         |
| 732.9071         | 1123.5482        | 394.90045        | 1015.675         | 252.13142        | 122.8264         |
| 732.9071         | 1123.5482        | 394.90045        | 1015.675         | 252.13142        | 122.8264         |
| 732.9071         | 1123.5482        | 394.90045        | 1015.675         | 252.13142        | 122.8264         |
| 99.3611          | 116.9211         | 67.309204        | 105.43472        | 13.170048        | 4.9999995        |
| 22.545568        | 26.898912        | 31.669016        | 25.33091         | 12.66467         | 4.9999995        |
| 45.406982        | 61.559624        | 40.08747         | 65.40008         | 11.690788        | 11.055631        |
| 114.53994        | 98.793274        | 84.66547         | 103.15192        | 36.60338         | 16.804369        |
| 528.8762         | 358.6671         | 869.7223         | 855.97766        | 238.47955        | 83.01592         |
| 64.28638         | 38.627003        | 27.786043        | 36.35535         | 19.457542        | 4.9999995        |
| 64.28638         | 38.627003        | 27.786043        | 36.35535         | 19.457542        | 4.9999995        |
| 64.28638         | 38.627003        | 27.786043        | 36.35535         | 19.457542        | 4.9999995        |
| 178.51988        | 129.86525        | 628.5099         | 445.94476        | 125.176186       | 113.60877        |
| 618.2065         | 810.6344         | 282.98425        | 614.27386        | 189.53969        | 71.9997          |
| 618.2065         | 810.6344         | 282.98425        | 614.27386        | 189.53969        | 71.9997          |
| <b>47.653793</b> | <b>64.78518</b>  | <b>48.395622</b> | <b>57.9019</b>   | <b>10.40215</b>  | <b>10.59874</b>  |
| 176.35025        | 205.1127         | 150.3425         | 203.54019        | 56.712315        | 70.87671         |
| 217.94803        | 363.18274        | 139.19698        | 292.30466        | 80.508385        | 107.94887        |
| 1165.8013        | 1166.7965        | 1223.32          | 1449.7561        | 170.35323        | 198.94583        |
| 23.70291         | 35.10646         | 42.80999         | 36.476437        | 13.758271        | 4.9999995        |
| 68.66804         | 65.76906         | 48.21449         | 72.636986        | 19.439428        | 8.372651         |
| 415.68408        | 190.87668        | 1069.8921        | 880.0686         | 225.10512        | 109.91728        |
| 26.057188        | 32.489662        | 52.662506        | 49.95627         | 6.0459085        | 6.1833644        |
| 167.03952        | 111.36609        | 217.91887        | 243.14699        | 39.9427          | 23.80883         |
| 33.76649         | 62.84619         | 22.787653        | 34.51068         | 6.1365733        | 11.01486         |
| 98.54444         | 115.70632        | 58.180508        | 87.65132         | 19.821888        | 4.9999995        |
| 127.075195       | 163.96927        | 113.6895         | 97.162155        | 54.26417         | 43.054455        |
| 127.075195       | 163.96927        | 113.6895         | 97.162155        | 54.26417         | 43.054455        |
| 831.16705        | 430.94528        | 1625.122         | 1301.7169        | 434.47842        | 74.85501         |
| 1277.6271        | 140.44678        | 100.20237        | 133.26768        | 49.901993        | 32.794106        |
| 39.49548         | 33.71654         | 16.658487        | 35.82926         | 9.927426         | 5.2551546        |
| 3764.3606        | 2778.7786        | 2533.0195        | 3262.9924        | 325.47934        | 538.25055        |
| 31.309504        | 104.95078        | 22.326021        | 51.242683        | 9.570139         | 11.46614         |
| <b>260.41827</b> | <b>257.92725</b> | <b>172.18378</b> | <b>246.39561</b> | <b>15.586133</b> | <b>10.400391</b> |
| 50.47174         | 4.9999995        | 148.37192        | 127.33911        | 5.099242         | 4.9999995        |
| 722.18634        | 548.6205         | 592.03375        | 716.59155        | 167.59927        | 123.44571        |
| 722.18634        | 548.6205         | 592.03375        | 716.59155        | 167.59927        | 123.44571        |
| 292.8429         | 216.09512        | 430.73224        | 402.02917        | 115.64939        | 67.28563         |
| 106.43167        | 230.07533        | 140.57784        | 239.95468        | 29.216375        | 21.629171        |
| 9087.656         | 8429.861         | 2888.1228        | 7026.921         | 2047.1567        | 1052.1721        |
| 160.02559        | 280.10904        | 219.22122        | 306.93033        | 31.867308        | 22.641998        |
| 37.955746        | 75.58407         | 21.713621        | 48.75369         | 8.087764         | 10.48197         |
| 2200.5918        | 2441.4797        | 1329.0746        | 1880.2975        | 393.16833        | 351.15033        |
| <b>12.880248</b> | <b>15.375411</b> | <b>10.058711</b> | <b>14.301369</b> | <b>4.9999995</b> | <b>4.9999995</b> |
| 379.9342         | 656.0796         | 520.62726        | 625.5897         | 111.005585       | 166.8266         |
| 379.9342         | 656.0796         | 520.62726        | 625.5897         | 111.005585       | 166.8266         |
| 61.34824         | 108.64671        | 21.55265         | 68.96237         | 11.26223         | 10.425401        |
| 61.34824         | 108.64671        | 21.55265         | 68.96237         | 11.26223         | 10.425401        |
| 327.63043        | 654.956          | 362.65137        | 596.6836         | 118.017296       | 26.210264        |
| 327.63043        | 654.956          | 362.65137        | 596.6836         | 118.017296       | 26.210264        |
| 327.63043        | 654.956          | 362.65137        | 596.6836         | 118.017296       | 26.210264        |
| 327.63043        | 654.956          | 362.65137        | 596.6836         | 118.017296       | 26.210264        |
| 182.519          | 25.513378        | 30.578533        | 37.54469         | 22.742876        | 4.9999995        |
| 848.87274        | 1035.0062        | 572.22797        | 1020.90784       | 227.86432        | 135.42017        |
| 848.87274        | 1035.0062        | 572.22797        | 1020.90784       | 227.86432        | 135.42017        |



|                  |                  |                  |                  |                  |                  |
|------------------|------------------|------------------|------------------|------------------|------------------|
| 23.463793        | 13.6361          | 17.952156        | 19.68155         | 4.969976         | 5.2045507        |
| 17.543983        | 25.840134        | 16.39909         | 19.094995        | 5.521252         | 4.2159348        |
| 19401.277        | 441.73282        | 907.4168         | 488.4971         | 13.950177        | 14.133187        |
| 16.74106         | 13.033379        | 12.03458         | 13.284672        | 5.7370043        | 4.696725         |
| 7.004584         | 7.1871624        | 4.9999995        | 4.9999995        | 6.321594         | 5.5317774        |
| 33.17481         | 77.06034         | 47.20024         | 45.92289         | 8.027199         | 8.368383         |
| 773.9482         | 30.85896         | 45.705097        | 27.559317        | 8.9428835        | 9.235538         |
| 8.215114         | 16.151321        | 10.92313         | 7.9372244        | 4.5137343        | 5.500935         |
| 399.17004        | 118.31619        | 322.43442        | 168.8992         | 9.403176         | 9.484208         |
| 399.17004        | 118.31619        | 322.43442        | 168.8992         | 9.403176         | 9.484208         |
| 399.17004        | 118.31619        | 322.43442        | 168.8992         | 9.403176         | 9.484208         |
| 20.190453        | 27.750929        | 24.970903        | 28.869959        | 5.583965         | 4.0259857        |
| 11.850092        | 5.383131         | 9.357645         | 6.1613526        | 4.8081784        | 4.51008          |
| 4.9999995        | 17.190624        | 5.455216         | 7.0481005        | 4.6758213        | 4.155762         |
| 61.999905        | 33.406467        | 28.992088        | 31.172915        | 6.7892675        | 7.0110326        |
| 516.32666        | 173.68382        | 184.82138        | 140.17052        | 9.223883         | 9.545251         |
| 33.280888        | 14.48613         | 14.978561        | 6.857881         | 5.2867675        | 5.1746325        |
| 33.280888        | 14.48613         | 14.978561        | 6.857881         | 5.2867675        | 5.1746325        |
| 33.280888        | 14.48613         | 14.978561        | 6.857881         | 5.2867675        | 5.1746325        |
| 131.94185        | 51.244358        | 159.82129        | 63.379684        | 7.8810744        | 9.004382         |
| 318.15717        | 126.512215       | 177.35852        | 127.624405       | 8.718557         | 8.859375         |
| 318.15717        | 126.512215       | 177.35852        | 127.624405       | 8.718557         | 8.859375         |
| <b>4.9999995</b> | <b>9.376392</b>  | <b>8.47743</b>   | <b>12.464661</b> | <b>5.5419273</b> | <b>5.7483354</b> |
| 24.726595        | 37.93934         | 30.654945        | 23.402422        | 7.2172213        | 7.748699         |
| 57.457577        | 139.80638        | 75.66895         | 83.20703         | 8.159349         | 8.778149         |
| 148.66724        | 271.02176        | 341.94504        | 230.6136         | 10.208026        | 10.600171        |
| 12.08071         | 16.98533         | 11.594051        | 6.2314734        | 4.136646         | 5.339797         |
| 30.12361         | 16.268332        | 13.808148        | 10.73483         | 5.0625634        | 4.640668         |
| 469.7864         | 30.76308         | 116.357475       | 57.40693         | 9.7872715        | 10.805613        |
| 11.88777         | 7.0873256        | 13.232698        | 8.772693         | 4.5321236        | 4.3089967        |
| 44.984703        | 41.127647        | 66.14614         | 40.26883         | 7.3976846        | 7.765858         |
| 7.2287655        | 36.638226        | 4.9999995        | 21.16159         | 4.5203495        | 4.8843236        |
| 22.169947        | 21.425253        | 28.908573        | 19.004957        | 5.6594           | 5.477187         |
| 76.77857         | 47.792187        | 56.384434        | 47.64661         | 7.9216166        | 8.45911          |
| 76.77857         | 47.792187        | 56.384434        | 47.64661         | 7.9216166        | 8.45911          |
| 940.6367         | 55.88614         | 85.33142         | 66.139626        | 9.709318         | 9.902028         |
| 67.55164         | 51.762188        | 42.39695         | 42.49146         | 8.979126         | 6.159248         |
| 5.92984          | 12.389869        | 8.9255085        | 8.523706         | 4.836656         | 5.082327         |
| 240.30437        | 589.5355         | 508.06143        | 454.86517        | 11.377388        | 11.461204        |
| 13.82932         | 11.31792         | 4.9999995        | 10.1217          | 4.895299         | 5.0142083        |
| <b>22.442753</b> | <b>28.296125</b> | <b>19.20107</b>  | <b>25.39222</b>  | <b>7.209155</b>  | <b>6.8859763</b> |
| 4.9999995        | 9.422351         | 31.058594        | 14.544499        | 4.3946624        | 3.5007918        |
| 226.21628        | 93.132545        | 179.13931        | 104.892006       | 8.938146         | 8.863318         |
| 226.21628        | 93.132545        | 179.13931        | 104.892006       | 8.938146         | 8.863318         |
| 174.75006        | 73.102715        | 106.58079        | 74.12265         | 9.002161         | 9.727964         |
| 39.86905         | 50.248035        | 33.21302         | 29.053616        | 6.099095         | 6.0394397        |
| 3270.5225        | 1277.7454        | 1668.0779        | 1109.0953        | 12.21414         | 11.443338        |
| 26.285696        | 30.595356        | 121.3229         | 64.45575         | 7.777924         | 8.348778         |
| 4.9999995        | 4.9999995        | 5.429803         | 6.1548905        | 4.571232         | 3.3823872        |
| 413.76532        | 728.31274        | 389.84485        | 529.77057        | 10.269868        | 9.817555         |
| <b>4.9999995</b> | <b>4.9999995</b> | <b>4.9999995</b> | <b>4.9999995</b> | <b>3.2980678</b> | <b>3.9986062</b> |
| 59.10558         | 229.88477        | 247.52383        | 214.95657        | 8.524447         | 8.937201         |
| 59.10558         | 229.88477        | 247.52383        | 214.95657        | 8.524447         | 8.937201         |
| 18.240105        | 13.949211        | 14.472899        | 12.07664         | 4.6896424        | 4.929501         |
| 18.240105        | 13.949211        | 14.472899        | 12.07664         | 4.6896424        | 4.929501         |
| 211.8212         | 110.2518         | 272.51373        | 154.61008        | 7.9952574        | 7.9328475        |
| 211.8212         | 110.2518         | 272.51373        | 154.61008        | 7.9952574        | 7.9328475        |
| 211.8212         | 110.2518         | 272.51373        | 154.61008        | 7.9952574        | 7.9328475        |
| 211.8212         | 110.2518         | 272.51373        | 154.61008        | 7.9952574        | 7.9328475        |
| 33.586597        | 5.856607         | 20.38763         | 6.8809013        | 6.588511         | 5.9786           |
| 310.49396        | 183.68738        | 262.55298        | 179.07951        | 9.082062         | 8.801169         |
| 310.49396        | 183.68738        | 262.55298        | 179.07951        | 9.082062         | 8.801169         |

|                  |                  |                  |                  |                  |                  |
|------------------|------------------|------------------|------------------|------------------|------------------|
| 5.1825056        | 6.3904905        | 7.027473         | 6.84785          | 4.006775         | 3.8792942        |
| 5.8971314        | 5.4382467        | 7.1350074        | 6.7609873        | 4.603236         | 4.3248324        |
| 13.480722        | 11.104032        | 14.563588        | 14.167015        | 12.407313        | 9.472637         |
| 6.388678         | 6.509368         | 4.7978883        | 5.783756         | 4.0395145        | 3.8736084        |
| 7.0156975        | 5.165352         | 5.3833957        | 5.350389         | 2.3467326        | 2.4279919        |
| 7.8522677        | 8.356371         | 8.188391         | 8.311046         | 6.0704503        | 7.031358         |
| 8.291078         | 7.3206496        | 9.684285         | 8.979126         | 8.086018         | 5.7551394        |
| 2.3258038        | 5.272189         | 4.9883494        | 5.2404714        | 3.4782882        | 3.6510592        |
| 9.165597         | 9.807618         | 8.371483         | 9.400282         | 8.235976         | 7.7894106        |
| 9.165597         | 9.807618         | 8.371483         | 9.400282         | 8.235976         | 7.7894106        |
| 9.165597         | 9.807618         | 8.371483         | 9.400282         | 8.235976         | 7.7894106        |
| 6.315116         | 6.5367284        | 5.8743763        | 6.199711         | 3.9453838        | 2.4279919        |
| 4.182075         | 4.286735         | 4.842116         | 4.2083573        | 3.8899095        | 2.4279919        |
| 5.1851177        | 5.567591         | 5.1657352        | 5.520661         | 3.7762213        | 4.257183         |
| 6.5207367        | 6.2760463        | 6.1985574        | 6.168655         | 5.429368         | 4.886526         |
| 8.692288         | 8.163056         | 9.509842         | 9.160231         | 8.150287         | 7.228176         |
| 5.701051         | 4.845128         | 4.665508         | 4.719104         | 4.519997         | 2.4279919        |
| 5.701051         | 4.845128         | 4.665508         | 4.719104         | 4.519997         | 2.4279919        |
| 5.701051         | 4.845128         | 4.665508         | 4.719104         | 4.519997         | 2.4279919        |
| 7.151937         | 6.6922803        | 9.028956         | 8.231252         | 7.1994696        | 7.679269         |
| 8.8983135        | 9.347438         | 7.9002376        | 8.684581         | 7.811996         | 7.0142674        |
| 8.8983135        | 9.347438         | 7.9002376        | 8.684581         | 7.811996         | 7.0142674        |
| <b>5.2572536</b> | <b>5.6450987</b> | <b>5.4249654</b> | <b>5.3546724</b> | <b>3.6071098</b> | <b>4.192396</b>  |
| 7.1332765        | 7.365166         | 7.0142674        | 7.1394725        | 6.0631127        | 6.994612         |
| 7.447058         | 8.1801195        | 6.899891         | 7.6440134        | 6.55507          | 7.600642         |
| 9.817851         | 9.871557         | 9.990443         | 9.91113          | 7.657093         | 8.495431         |
| 4.258119         | 4.6986756        | 5.2630916        | 4.723813         | 4.008932         | 2.4279919        |
| 5.7919316        | 5.668151         | 5.420184         | 5.6738076        | 4.518054         | 3.8351514        |
| 8.3553           | 7.255569         | 9.808744         | 9.194729         | 8.065393         | 7.626748         |
| 4.3946624        | 4.579701         | 5.536999         | 5.1538105        | 2.7983694        | 3.379466         |
| 7.0526505        | 6.456041         | 7.5244865        | 7.3796406        | 5.555566         | 5.409044         |
| 4.7632113        | 5.5982914        | 4.4015985        | 4.6496377        | 2.8203588        | 4.251554         |
| 6.3017235        | 6.520857         | 5.6742473        | 5.933847         | 4.5441346        | 2.4279919        |
| 6.665085         | 7.034821         | 6.6141176        | 6.082597         | 5.9977736        | 6.274859         |
| 6.665085         | 7.034821         | 6.6141176        | 6.082597         | 5.9977736        | 6.274859         |
| 9.347438         | 8.443109         | 10.380815        | 9.766264         | 9.028195         | 7.070514         |
| 9.95616          | 6.808729         | 6.4335265        | 6.5315537        | 5.876034         | 5.8732653        |
| 4.9886355        | 4.633879         | 3.978674         | 4.698577         | 3.533727         | 3.123984         |
| 11.519689        | 11.107282        | 11.027109        | 11.058637        | 8.614396         | 9.935325         |
| 4.661604         | 6.362386         | 4.3753033        | 5.1880274        | 3.4772117        | 4.310066         |
| <b>7.693179</b>  | <b>7.701006</b>  | <b>7.198965</b>  | <b>7.4009843</b> | <b>4.1928</b>    | <b>4.164661</b>  |
| 5.342207         | 2.3221264        | 6.992454         | 6.466003         | 2.5704718        | 2.4279919        |
| 9.141812         | 8.778149         | 8.949514         | 8.905782         | 7.633998         | 7.7978673        |
| 9.141812         | 8.778149         | 8.949514         | 8.905782         | 7.633998         | 7.7978673        |
| 7.8606377        | 7.446378         | 8.492233         | 8.078265         | 7.0913277        | 6.926316         |
| 6.4173727        | 7.542966         | 6.91467          | 7.3622255        | 5.098074         | 5.265789         |
| 12.823107        | 12.690246        | 11.211527        | 12.162447        | 11.3147135       | 10.919481        |
| 6.988374         | 7.812336         | 7.5324755        | 7.716975         | 5.2259626        | 5.328396         |
| 4.9331083        | 5.880164         | 4.33707          | 5.120128         | 3.2178926        | 4.176596         |
| 10.754457        | 10.91888         | 10.101313        | 10.287517        | 8.877764         | 9.325216         |
| <b>3.3580575</b> | <b>3.3810966</b> | <b>3.2827628</b> | <b>3.423956</b>  | <b>2.3467326</b> | <b>2.4279919</b> |
| 8.219886         | 9.044526         | 8.767781         | 8.712848         | 7.0300875        | 8.229831         |
| 8.219886         | 9.044526         | 8.767781         | 8.712848         | 7.0300875        | 8.229831         |
| 5.630742         | 6.416201         | 4.326337         | 5.5950766        | 3.7238145        | 4.169031         |
| 5.630742         | 6.416201         | 4.326337         | 5.5950766        | 3.7238145        | 4.169031         |
| 8.021657         | 9.041888         | 8.247615         | 8.636113         | 7.119849         | 5.5478826        |
| 8.021657         | 9.041888         | 8.247615         | 8.636113         | 7.119849         | 5.5478826        |
| 8.021657         | 9.041888         | 8.247615         | 8.636113         | 7.119849         | 5.5478826        |
| 8.021657         | 9.041888         | 8.247615         | 8.636113         | 7.119849         | 5.5478826        |
| 7.188959         | 4.2008896        | 4.79337          | 4.763393         | 4.748013         | 2.4279919        |
| 9.379216         | 9.700932         | 8.902398         | 9.410531         | 8.083208         | 7.9316487        |
| 9.379216         | 9.700932         | 8.902398         | 9.410531         | 8.083208         | 7.9316487        |

|                 |                  |                  |                  |
|-----------------|------------------|------------------|------------------|
| 4.581539        | 3.8931668        | 4.437399         | 4.6306543        |
| 4.1842256       | 4.8829436        | 4.3089967        | 4.5845947        |
| 14.1761265      | 9.235369         | 10.0708685       | 9.488966         |
| 4.123904        | 3.8246913        | 3.8661284        | 4.0415215        |
| 2.9718444       | 2.938816         | 2.3618152        | 2.352752         |
| 5.06311         | 6.590323         | 5.8348327        | 5.942216         |
| 9.544808        | 5.1570044        | 5.7830095        | 5.1571293        |
| 3.1701298       | 4.1560416        | 3.7241259        | 3.2623558        |
| 8.596906        | 7.242311         | 8.573426         | 7.9011364        |
| 8.596906        | 7.242311         | 8.573426         | 7.9011364        |
| 8.596906        | 7.242311         | 8.573426         | 7.9011364        |
| 4.3766584       | 4.9970264        | 4.91364          | 5.231032         |
| 3.6561031       | 2.5656483        | 3.5120616        | 2.8828216        |
| 2.350709        | 4.2456536        | 2.7844732        | 3.0796893        |
| 5.9393587       | 5.277883         | 5.136894         | 5.3536797        |
| 8.965703        | 7.8187933        | 7.780123         | 7.623181         |
| 5.0689945       | 3.991607         | 4.1775355        | 3.0352545        |
| 5.0689945       | 3.991607         | 4.1775355        | 3.0352545        |
| 5.0689945       | 3.991607         | 4.1775355        | 3.0352545        |
| 7.000282        | 5.9525433        | 7.550085         | 6.430274         |
| 8.264001        | 7.3515215        | 7.7126794        | 7.4826546        |
| 8.264001        | 7.3515215        | 7.7126794        | 7.4826546        |
| <b>2.350709</b> | <b>3.3274324</b> | <b>3.3754</b>    | <b>3.9413645</b> |
| 4.6513805       | 5.4783583        | 5.213279         | 4.8952456        |
| 5.831658        | 7.496756         | 6.503477         | 6.8273077        |
| 7.1691866       | 8.520073         | 8.6537485        | 8.382165         |
| 3.6818385       | 4.227992         | 3.8092785        | 2.9007175        |
| 4.929294        | 4.1658506        | 4.0589104        | 3.7163334        |
| 8.829414        | 5.152663         | 7.1148143        | 6.2835765        |
| 3.6602206       | 2.9191723        | 4.0002627        | 3.4090776        |
| 5.489077        | 5.6008096        | 6.316082         | 5.7416005        |
| 3.007496        | 5.4263725        | 2.3618152        | 4.7442455        |
| 4.503815        | 4.588143         | 5.1318736        | 4.5777607        |
| 6.2309866       | 5.840043         | 6.0837755        | 5.998408         |
| 6.2309866       | 5.840043         | 6.0837755        | 5.998408         |
| 9.819699        | 6.0880957        | 6.6686206        | 6.4917765        |
| 6.05861         | 5.9685664        | 5.6786127        | 5.825148         |
| 2.7745209       | 3.747278         | 3.4444818        | 3.3660731        |
| 7.853992        | 9.66805          | 9.223558         | 9.380915         |
| 3.8631744       | 3.6108353        | 2.3618152        | 3.631518         |
| <b>4.519867</b> | <b>5.0259094</b> | <b>4.5289574</b> | <b>5.024656</b>  |
| 2.350709        | 3.33342          | 5.2313824        | 4.175867         |
| 7.7635474       | 6.871183         | 7.7307467        | 7.176069         |
| 7.7635474       | 6.871183         | 7.7307467        | 7.176069         |
| 7.403175        | 6.5131993        | 6.991296         | 6.6619935        |
| 5.314548        | 5.9222245        | 5.325081         | 5.241852         |
| 11.64623        | 10.82421         | 10.955095        | 10.713975        |
| 4.739735        | 5.145493         | 7.1701584        | 6.455829         |
| 2.350709        | 2.3408759        | 2.7789788        | 2.8812673        |
| 8.648947        | 9.978375         | 8.846115         | 9.600977         |
| <b>2.350709</b> | <b>2.3408759</b> | <b>2.3618152</b> | <b>2.352752</b>  |
| 5.8718977       | 8.254787         | 8.208026         | 8.276898         |
| 5.8718977       | 8.254787         | 8.208026         | 8.276898         |
| 4.243815        | 3.9282544        | 4.1269555        | 3.8957617        |
| 4.243815        | 3.9282544        | 4.1269555        | 3.8957617        |
| 7.674352        | 7.1293497        | 8.341963         | 7.7727757        |
| 7.674352        | 7.1293497        | 8.341963         | 7.7727757        |
| 7.674352        | 7.1293497        | 8.341963         | 7.7727757        |
| 7.674352        | 7.1293497        | 8.341963         | 7.7727757        |
| 5.082327        | 2.660783         | 4.616348         | 3.0407467        |
| 8.2238035       | 7.9109406        | 8.2918215        | 7.993169         |
| 8.2238035       | 7.9109406        | 8.2918215        | 7.993169         |

|                      |                    |                   |                  |           |                  |
|----------------------|--------------------|-------------------|------------------|-----------|------------------|
| ASHGA5P041074        | 0.000450046        | 0.014980461       | 2.1677044        | up        | noncoding        |
| ASHGA5P042199        | 0.009947312        | 0.061915152       | 2.0652369        | up        | noncoding        |
| ASHGA5P027391        | 0.011298323        | 0.065455073       | 2.0822545        | up        | noncoding        |
| ASHGA5P052531        | 0.001656978        | 0.027211232       | 2.0575955        | up        | noncoding        |
| ASHGA5P057641        | 0.016384255        | 0.07814689        | 2.4070855        | up        | noncoding        |
| ASHGA5P017601        | 0.038401725        | 0.124684947       | 4.0701541        | up        | noncoding        |
| ASHGA5P029203        | 0.00028306         | 0.012492602       | 4.7146348        | up        | noncoding        |
| ASHGA5P029203        | 0.00028306         | 0.012492602       | 4.7146348        | up        | noncoding        |
| ASHGA5P029203        | 0.00028306         | 0.012492602       | 4.7146348        | up        | noncoding        |
| ASHGA5P029203        | 0.00028306         | 0.012492602       | 4.7146348        | up        | noncoding        |
| ASHGA5P029203        | 0.00028306         | 0.012492602       | 4.7146348        | up        | noncoding        |
| ASHGA5P036775        | 0.000236404        | 0.011933736       | 3.0242906        | up        | noncoding        |
| ASHGA5P020919        | 0.001652917        | 0.027211232       | 2.6006781        | up        | noncoding        |
| ASHGA5P020919        | 0.001652917        | 0.027211232       | 2.6006781        | up        | noncoding        |
| ASHGA5P020919        | 0.001652917        | 0.027211232       | 2.6006781        | up        | noncoding        |
| ASHGA5P014668        | 0.000812644        | 0.019071379       | 4.6661324        | up        | noncoding        |
| ASHGA5P026756        | 0.00055781         | 0.016097331       | 2.0335124        | up        | noncoding        |
| ASHGA5P016643        | 0.000543107        | 0.016009043       | 6.9760798        | up        | noncoding        |
| ASHGA5P021756        | 0.038123836        | 0.124178673       | 2.4211824        | up        | noncoding        |
| ASHGA5P046457        | 0.022687612        | 0.093189341       | 2.5241125        | up        | noncoding        |
| ASHGA5P023551        | 0.016778807        | 0.078957015       | 2.4459357        | up        | noncoding        |
| ASHGA5P019332        | 0.001823655        | 0.028643965       | 2.7157544        | up        | noncoding        |
| ASHGA5P019332        | 0.001823655        | 0.028643965       | 2.7157544        | up        | noncoding        |
| ASHGA5P051749        | 0.003356491        | 0.037423637       | 2.3339914        | up        | noncoding        |
| ASHGA5P025918        | 0.003185604        | 0.036540506       | 3.1892772        | up        | noncoding        |
| ASHGA5P025918        | 0.003185604        | 0.036540506       | 3.1892772        | up        | noncoding        |
| ASHGA5P025918        | 0.003185604        | 0.036540506       | 3.1892772        | up        | noncoding        |
| ASHGA5P025918        | 0.003185604        | 0.036540506       | 3.1892772        | up        | noncoding        |
| ASHGA5P022979        | 0.011289904        | 0.065455073       | 2.2176838        | up        | noncoding        |
| ASHGA5P022979        | 0.011289904        | 0.065455073       | 2.2176838        | up        | noncoding        |
| ASHGA5P022979        | 0.011289904        | 0.065455073       | 2.2176838        | up        | noncoding        |
| ASHGA5P027541        | 0.007028974        | 0.052947146       | 2.1461837        | up        | noncoding        |
| ASHGA5P056316        | 0.000870793        | 0.019883224       | 3.5098283        | up        | noncoding        |
| ASHGA5P036779        | 0.002417958        | 0.031997277       | 4.245446         | up        | noncoding        |
| ASHGA5P051170        | 0.000112088        | 0.009604611       | 3.3498184        | up        | noncoding        |
| ASHGA5P028818        | 0.010354642        | 0.062843093       | 2.3710475        | up        | noncoding        |
| ASHGA5P028818        | 0.010354642        | 0.062843093       | 2.3710475        | up        | noncoding        |
| <b>ASHGA5P020639</b> | <b>0.000546723</b> | <b>0.01603938</b> | <b>3.5793683</b> | <b>up</b> | <b>noncoding</b> |
| ASHGA5P053882        | 0.016128457        | 0.077717436       | 2.042821         | up        | noncoding        |
| ASHGA5P016660        | 1.93261E-05        | 0.004838692       | 2.2632897        | up        | noncoding        |
| ASHGA5P029596        | 0.039052982        | 0.125985736       | 2.2724824        | up        | noncoding        |
| ASHGA5P030691        | 0.000129936        | 0.010460795       | 4.6171897        | up        | noncoding        |
| ASHGA5P030532        | 0.040997537        | 0.129441514       | 12.2338209       | up        | noncoding        |
| ASHGA5P030532        | 0.040997537        | 0.129441514       | 12.2338209       | up        | noncoding        |
| ASHGA5P030532        | 0.040997537        | 0.129441514       | 12.2338209       | up        | noncoding        |
| ASHGA5P030532        | 0.040997537        | 0.129441514       | 12.2338209       | up        | noncoding        |
| ASHGA5P030532        | 0.040997537        | 0.129441514       | 12.2338209       | up        | noncoding        |
| ASHGA5P039165        | 0.019271613        | 0.084598619       | 2.029227         | up        | noncoding        |
| ASHGA5P049514        | 0.007307525        | 0.053778037       | 2.3085138        | up        | noncoding        |
| ASHGA5P049514        | 0.007307525        | 0.053778037       | 2.3085138        | up        | noncoding        |
| ASHGA5P038533        | 0.031394587        | 0.111265481       | 2.366561         | up        | noncoding        |
| ASHGA5P026504        | 0.002104181        | 0.03028922        | 2.196086         | up        | noncoding        |
| ASHGA5P032551        | 0.012945484        | 0.069717918       | 2.6249989        | up        | noncoding        |
| ASHGA5P039311        | 0.030539932        | 0.109648554       | 3.8394862        | up        | noncoding        |
| ASHGA5P028120        | 0.019099728        | 0.084217792       | 2.348014         | up        | noncoding        |
| ASHGA5P030911        | 8.33913E-05        | 0.008738697       | 6.4559835        | up        | noncoding        |
| ASHGA5P014184        | 1.40415E-05        | 0.004434727       | 4.1280499        | up        | noncoding        |
| ASHGA5P014184        | 1.40415E-05        | 0.004434727       | 4.1280499        | up        | noncoding        |
| ASHGA5P048363        | 0.01338832         | 0.070917754       | 2.0529517        | up        | noncoding        |
| ASHGA5P028899        | 0.000209711        | 0.01146874        | 7.6262526        | up        | noncoding        |
| ASHGA5P028519        | 0.02476597         | 0.09773105        | 2.1818576        | up        | noncoding        |
| ASHGA5P043242        | 0.020856138        | 0.088872205       | 2.2752255        | up        | noncoding        |

|                        |               |                     |            |             |          |
|------------------------|---------------|---------------------|------------|-------------|----------|
| TCONS_00021656         | XLOC_010622   | LincRNAs identified | 6166       | chr13       | -        |
| uc003qxf.3             | AK023627      | UCSC_knowngene      | 2072       | chr6        | -        |
| ENST00000546214        | RP11-415I12.5 | GENCODE             | 563        | chr12       | -        |
| ENST00000515525        | RP11-423H2.1  | GENCODE             | 573        | chr5        | +        |
| TCONS_00020287         | XLOC_009632   | LincRNAs identified | 882        | chr12       | +        |
| ENST00000443621        | LINC00393     | GENCODE             | 282        | chr13       | -        |
| ENST00000557409        | RP11-363J20.1 | GENCODE             | 538        | chr14       | -        |
| ENST00000557409        | RP11-363J20.1 | GENCODE             | 538        | chr14       | -        |
| ENST00000557409        | RP11-363J20.1 | GENCODE             | 538        | chr14       | -        |
| ENST00000557409        | RP11-363J20.1 | GENCODE             | 538        | chr14       | -        |
| ENST00000557409        | RP11-363J20.1 | GENCODE             | 538        | chr14       | -        |
| uc002xid.1             | AX746690      | UCSC_knowngene      | 2002       | chr20       | -        |
| NR_027427              | TATDN1        | RefSeq              | 1158       | chr8        | -        |
| NR_027427              | TATDN1        | RefSeq              | 1158       | chr8        | -        |
| NR_027427              | TATDN1        | RefSeq              | 1158       | chr8        | -        |
| ENST00000412301        | AC129778.2    | GENCODE             | 476        | chr9        | -        |
| TCONS_00012453         | XLOC_005238   | LincRNAs identified | 956        | chr6        | +        |
| ENST00000432481        | AC009410.1    | GENCODE             | 676        | chr2        | -        |
| ENST00000540093        | RP11-885B4.1  | GENCODE             | 220        | chr12       | -        |
| ENST00000433228        | RP1-60N8.1    | GENCODE             | 1554       | chrX        | +        |
| ENST00000583854        | CTD-2532D12.4 | GENCODE             | 1140       | chr17       | +        |
| NR_045147              | ITGB3BP       | RefSeq              | 1069       | chr1        | -        |
| NR_045147              | ITGB3BP       | RefSeq              | 1069       | chr1        | -        |
| uc001eso.1             | AB007962      | UCSC_knowngene      | 5053       | chr1        | +        |
| NR_046318              | ENC1          | RefSeq              | 3705       | chr5        | -        |
| NR_046318              | ENC1          | RefSeq              | 3705       | chr5        | -        |
| NR_046318              | ENC1          | RefSeq              | 3705       | chr5        | -        |
| NR_046318              | ENC1          | RefSeq              | 3705       | chr5        | -        |
| ENST00000567047        | RP11-626G11.5 | GENCODE             | 380        | chr16       | -        |
| ENST00000567047        | RP11-626G11.5 | GENCODE             | 380        | chr16       | -        |
| ENST00000567047        | RP11-626G11.5 | GENCODE             | 380        | chr16       | -        |
| ENST00000549807        | RP11-818F20.5 | GENCODE             | 701        | chr12       | -        |
| TCONS_00002364         | XLOC_000808   | LincRNAs identified | 322        | chr1        | -        |
| ENST00000439912        | SNORA71A      | GENCODE             | 138        | chr20       | -        |
| ENST00000447037        | AP001469.9    | GENCODE             | 686        | chr21       | -        |
| NR_046511              | MED4-AS1      | RefSeq              | 544        | chr13       | +        |
| NR_046511              | MED4-AS1      | RefSeq              | 544        | chr13       | +        |
| <b>ENST00000517838</b> | <b>PVT1</b>   | <b>GENCODE</b>      | <b>518</b> | <b>chr8</b> | <b>+</b> |
| uc004cin.3             | SNHG7         | UCSC_knowngene      | 743        | chr9        | -        |
| ENST00000432673        | RP11-390P2.4  | GENCODE             | 917        | chr6        | +        |
| ENST00000419578        | RP1-13P20.6   | GENCODE             | 1997       | chr1        | -        |
| ENST00000561560        | RP11-358L4.1  | GENCODE             | 529        | chr15       | +        |
| NR_024490              | GABPB1-AS1    | RefSeq              | 4139       | chr15       | +        |
| NR_024490              | GABPB1-AS1    | RefSeq              | 4139       | chr15       | +        |
| NR_024490              | GABPB1-AS1    | RefSeq              | 4139       | chr15       | +        |
| NR_024490              | GABPB1-AS1    | RefSeq              | 4139       | chr15       | +        |
| NR_024490              | GABPB1-AS1    | RefSeq              | 4139       | chr15       | +        |
| ENST00000569932        | RP11-255C15.3 | GENCODE             | 1566       | chr3        | +        |
| NR_045027              | C17orf76-AS1  | RefSeq              | 1158       | chr17       | +        |
| NR_045027              | C17orf76-AS1  | RefSeq              | 1158       | chr17       | +        |
| ENST00000566372        | RP11-16N11.2  | GENCODE             | 1715       | chr3        | -        |
| ENST00000527789        | AP003068.12   | GENCODE             | 175        | chr11       | +        |
| TCONS_00029045         | XLOC_013960   | LincRNAs identified | 461        | chr21       | +        |
| ENST00000511928        | AC141928.1    | GENCODE             | 4525       | chr4        | -        |
| ENST00000546170        | GS1-410F4.4   | GENCODE             | 444        | chr12       | +        |
| ENST00000576762        | AJ003147.8    | GENCODE             | 454        | chr16       | -        |
| NR_033255              | DTYMK         | RefSeq              | 1136       | chr2        | -        |
| NR_033255              | DTYMK         | RefSeq              | 1136       | chr2        | -        |
| uc009yvh.3             | AK311356      | UCSC_knowngene      | 853        | chr11       | -        |
| ENST00000581816        | MIR17HG       | GENCODE             | 2032       | chr13       | +        |
| ENST00000413246        | RP11-187A9.3  | GENCODE             | 363        | chr13       | -        |
| uc010lhv.1             | AK091729      | UCSC_knowngene      | 1986       | chr7        | -        |

|           |           |                  |                            |                       |
|-----------|-----------|------------------|----------------------------|-----------------------|
| 53263721  | 53274883  |                  | CACACTTGTATATGCTCCCACTGA   | intergenic            |
| 170149607 | 170151679 |                  | GTGTTCCCTGTGTCTTTCTGAATCTC | exon sense-overlappi  |
| 64202624  | 64215936  |                  | TTCCAGTTCTTGATAAAGATAAAGG  | natural antisense     |
| 177303255 | 177309506 | ENST00000502601, | AATCTCCTGGAACAATGACAATAAT  | intergenic            |
| 6387276   | 6391856   |                  | TTTTCTGATTTGCTCTGAGAAGAC   | intergenic            |
| 73987609  | 74120978  |                  | GACTTTTTTGGTCTACTGTGTCTGCC | intergenic            |
| 69657594  | 69658809  |                  | CTATGCCATCTTTTATAGCGATAACC | intronic antisense    |
| 69657594  | 69658809  |                  | CTATGCCATCTTTTATAGCGATAACC | intronic antisense    |
| 69657594  | 69658809  |                  | CTATGCCATCTTTTATAGCGATAACC | intronic antisense    |
| 69657594  | 69658809  |                  | CTATGCCATCTTTTATAGCGATAACC | natural antisense     |
| 69657594  | 69658809  |                  | CTATGCCATCTTTTATAGCGATAACC | natural antisense     |
| 37034659  | 37045444  |                  | AAGGCTCAACTGGGTATGATTGTCA  | intergenic            |
| 125500734 | 125551329 |                  | GATTTAATGGTTC 83940        | exon sense-overlappi  |
| 125500734 | 125551329 |                  | GATTTAATGGTTC 83940        | exon sense-overlappi  |
| 125500734 | 125551329 |                  | GATTTAATGGTTC 83940        | natural antisense     |
| 42853719  | 42857852  | ENST00000432011  | TGGATGGTGGCTTCCAATTGTGGAC  | intergenic            |
| 30259313  | 30271912  |                  | GCTTCTCTAGGTGAAGGTTTAAAT   | intergenic            |
| 229347976 | 229476111 |                  | CCCTGGAGCCTTCATATAGAACTAC  | intergenic            |
| 2851791   | 2881074   |                  | GTACATACAGAGTGTCTCACCCAA   | intergenic            |
| 17546557  | 17605281  |                  | GGACAATGCTGATTTAGTAAGTTGG  | intron sense-overlapp |
| 71733992  | 71752696  |                  | GATTATAAAGCTTCTCCCTAATGGG  | intergenic            |
| 63906440  | 63988944  |                  | GCTCTCCTAGCA123421         | exon sense-overlappi  |
| 63906440  | 63988944  |                  | GCTCTCCTAGCA123421         | exon sense-overlappi  |
| 149627308 | 149651107 | ENST00000325963, | GCACCCCTTGAAGGTTTGTAAATGA  | intergenic            |
| 73923230  | 73937249  |                  | AGTCGCCACTGC 8507          | exon sense-overlappi  |
| 73923230  | 73937249  |                  | AGTCGCCACTGC 8507          | exon sense-overlappi  |
| 73923230  | 73937249  |                  | AGTCGCCACTGC 8507          | exon sense-overlappi  |
| 73923230  | 73937249  |                  | AGTCGCCACTGC 8507          | exon sense-overlappi  |
| 19074183  | 19079013  |                  | CACAGCAGACGAAAAAGCAAAGAG   | natural antisense     |
| 19074183  | 19079013  |                  | CACAGCAGACGAAAAAGCAAAGAG   | natural antisense     |
| 19074183  | 19079013  |                  | CACAGCAGACGAAAAAGCAAAGAG   | natural antisense     |
| 104656091 | 104674500 |                  | ACTGCACATGTAGAACGGTGTTCCT  | intronic antisense    |
| 43823627  | 43824390  |                  | TTAAATCCTACACGAGAGTCGATT   | intergenic            |
| 37055948  | 37056086  |                  | AAGAGGTTGTCC(26777         | intergenic            |
| 47671462  | 47672748  |                  | CATAGTAAGATGTGGTATTTGTGGA  | exon sense-overlappi  |
| 48651272  | 48654129  |                  | AGGATTGTTCAT(100873965     | natural antisense     |
| 48651272  | 48654129  |                  | AGGATTGTTCAT(100873965     | natural antisense     |
| 128903115 | 129008896 |                  | ATTTGGAGAGAA 5820          | intronic antisense    |
| 139619045 | 139620988 | NR_003672        | AGGATCACGCAG 84973         | natural antisense     |
| 139013684 | 139018425 |                  | AGCGCGACAGGGTTGTTATGAGGCT  | natural antisense     |
| 152902515 | 152921686 |                  | GTAAGGCAGCTAATATTTCTGTAC   | intergenic            |
| 79705699  | 79706228  |                  | AGTGGCAGGTCTGATTTGGTTATAG  | intergenic            |
| 50646370  | 50650503  |                  | ATCTGGGTTCCG(100129387     | natural antisense     |
| 50646370  | 50650503  |                  | ATCTGGGTTCCG(100129387     | natural antisense     |
| 50646370  | 50650503  |                  | ATCTGGGTTCCG(100129387     | natural antisense     |
| 50646370  | 50650503  |                  | ATCTGGGTTCCG(100129387     | natural antisense     |
| 50646370  | 50650503  |                  | ATCTGGGTTCCG(100129387     | natural antisense     |
| 179058109 | 179059675 |                  | CTTGTATACCGTGTAATATTTTATA  | intergenic            |
| 16342300  | 16345340  | ENST00000472293, | GGGCGCTGCGGC 125144        | natural antisense     |
| 16342300  | 16345340  | ENST00000472293, | GGGCGCTGCGGC 125144        | natural antisense     |
| 160471215 | 160472930 |                  | CTGAAGATTTGGTGGAAATATGCTT  | bidirectional         |
| 64884628  | 64884930  |                  | CGAGCTCCAGCTCCGCGGCGTCACT  | natural antisense     |
| 44776023  | 44777849  |                  | TTCAACGTCTCTGGTTGAAACCTTC  | intergenic            |
| 3760474   | 3765117   |                  | GAGACTGATGCTACATTTCTTTA    | intergenic            |
| 68323042  | 68363797  |                  | GGGTGAAGTTTTAAGGGTGCTTAC   | intergenic            |
| 3231232   | 3234018   |                  | GTATCCGACTTATAATACTGTC     | intergenic            |
| 242615156 | 242626383 |                  | TTTTTCTGCAAAI 1841         | exon sense-overlappi  |
| 242615156 | 242626383 |                  | TTTTTCTGCAAAI 1841         | exon sense-overlappi  |
| 82903178  | 82904681  |                  | GAGTTTGACTCAATTCTTATTATAAC | bidirectional         |
| 92000195  | 92004350  | NR_027350        | CCCATTAGGGA 407975         | intergenic            |
| 42617862  | 42618383  |                  | CCCATAAGGGATAATGCAACAGGAT  | intronic antisense    |
| 100893615 | 100895601 |                  | TCCACAGGCATAGAATCCATGTGAC  | exon sense-overlappi  |

|                 |         |                         |           |           |
|-----------------|---------|-------------------------|-----------|-----------|
| NM_174910       | TCTE3   | tctex1 domain-contai-   | 170140214 | 170151638 |
| NM_014254       | TMEM5   | transmembrane prote +   | 64173636  | 64202887  |
| NM_001193360    | EXD2    | exonuclease 3'-5' dor + | 69658193  | 69710737  |
| NM_001193361    | EXD2    | exonuclease 3'-5' dor + | 69658193  | 69710737  |
| NM_018199       | EXD2    | exonuclease 3'-5' dor + | 69658193  | 69710737  |
| NM_001193362    | EXD2    | exonuclease 3'-5' dor + | 69658482  | 69710737  |
| NM_001193363    | EXD2    | exonuclease 3'-5' dor + | 69658482  | 69710737  |
| NM_001146160    | TATDN1  | putative deoxyribonu-   | 125500734 | 125551329 |
| NM_032026       | TATDN1  | putative deoxyribonu-   | 125500734 | 125551329 |
| NM_007218       | RNF139  | E3 ubiquitin-protein +  | 125487007 | 125500859 |
| NM_198270       | NHS     | Nance-Horan syndro +    | 17393542  | 17754113  |
| NM_001206739    | ITGB3BP | centromere protein R-   | 63906440  | 63988944  |
| NM_014288       | ITGB3BP | centromere protein R-   | 63906440  | 63988944  |
| NM_001256574    | ENC1    | ectoderm-neural cort-   | 73923230  | 73937249  |
| NM_001256575    | ENC1    | ectoderm-neural cort-   | 73923230  | 73937249  |
| NM_001256576    | ENC1    | ectoderm-neural cort-   | 73923230  | 73937249  |
| NM_003633       | ENC1    | ectoderm-neural cort-   | 73923230  | 73937249  |
| NM_001160364    | TMC7    | transmembrane chan +    | 18995608  | 19075262  |
| NM_016138       | COQ7    | ubiquinone biosynthe +  | 19078916  | 19091417  |
| NM_024847       | TMC7    | transmembrane chan +    | 18995255  | 19075262  |
| NM_001093771    | TXNRD1  | thioredoxin reductase + | 104609556 | 104744085 |
| NM_003906       | MCM3AP  | 80 kDa MCM3-assoc-      | 47655047  | 47705236  |
| NM_001270629    | MED4    | mediator of RNA pol-    | 48649863  | 48669277  |
| NM_014166       | MED4    | mediator of RNA pol-    | 48649863  | 48669277  |
| ENST00000539634 | TMEM75  | transmembrane prote -   | 128959125 | 128960591 |
| NM_152421       | FAM69B  | protein FAM69B +        | 139607023 | 139619170 |
| ENST00000491526 | NHSL1   | NHS-like 1 [Source:] -  | 138768201 | 139013708 |
| NM_002041       | GABPB1  | GA-binding protein s-   | 50578076  | 50647605  |
| NM_005254       | GABPB1  | GA-binding protein s-   | 50569388  | 50647605  |
| NM_016654       | GABPB1  | GA-binding protein s-   | 50569388  | 50647605  |
| NM_016655       | GABPB1  | GA-binding protein s-   | 50578076  | 50647605  |
| NM_181427       | GABPB1  | GA-binding protein s-   | 50578076  | 50647605  |
| NM_001113567    | FAM211A | leucine-rich repeat-co- | 16345318  | 16395505  |
| NM_207387       | FAM211A | leucine-rich repeat-co- | 16345318  | 16395505  |
| ENST00000497343 | PPM1L   | protein phosphatase, +  | 160473389 | 160740250 |
| NM_014205       | ZNHIT2  | zinc finger HIT doma-   | 64883874  | 64885170  |
| NM_001165031    | DTYMK   | thymidylate kinase is-  | 242615156 | 242626383 |
| NM_012145       | DTYMK   | thymidylate kinase is-  | 242615156 | 242626383 |
| NM_182603       | ANKRD42 | ankyrin repeat domai +  | 82905290  | 82960013  |
| NM_001204504    | DGKH    | diacylglycerol kinase + | 42614171  | 42803891  |
| ENST00000435848 | FIS1    | fission 1 (mitochondri- | 100882941 | 100895414 |

|             |            |           |           |           |           |
|-------------|------------|-----------|-----------|-----------|-----------|
| 17.341341   | 6.314945   | 3.761827  | 2.645659  | 21.002962 | 13.17585  |
| 2937.58385  | 900.963438 | 11.074709 | 10.028402 | 2803.287  | 2804.8367 |
| 31.275145   | 9.928612   | 4.57992   | 3.521773  | 30.79649  | 36.809273 |
| 3439.117633 | 930.63824  | 11.270346 | 10.229386 | 2920.192  | 3649.7307 |
| 52.628528   | 16.001841  | 5.337701  | 4.070414  | 60.052982 | 74.80703  |
| 194.74838   | 18.546389  | 6.525658  | 4.500574  | 330.99893 | 35.242622 |
| 69.290104   | 9.799341   | 5.751368  | 3.514222  | 75.29869  | 92.783485 |
| 69.290104   | 9.799341   | 5.751368  | 3.514222  | 75.29869  | 92.783485 |
| 69.290104   | 9.799341   | 5.751368  | 3.514222  | 75.29869  | 92.783485 |
| 69.290104   | 9.799341   | 5.751368  | 3.514222  | 75.29869  | 92.783485 |
| 69.290104   | 9.799341   | 5.751368  | 3.514222  | 75.29869  | 92.783485 |
| 989.563728  | 167.831162 | 9.184477  | 7.58788   | 552.58374 | 868.1611  |
| 311.790197  | 67.690258  | 7.791208  | 6.41232   | 260.77313 | 315.28763 |
| 311.790197  | 67.690258  | 7.791208  | 6.41232   | 260.77313 | 315.28763 |
| 311.790197  | 67.690258  | 7.791208  | 6.41232   | 260.77313 | 315.28763 |
| 1341.267772 | 166.643827 | 9.883431  | 7.661204  | 877.0788  | 916.6797  |
| 261.819833  | 80.17887   | 7.649765  | 6.625791  | 260.37454 | 318.20154 |
| 138.039595  | 11.086417  | 6.460839  | 3.658422  | 163.368   | 21.88066  |
| 27.166411   | 8.416845   | 4.368231  | 3.092519  | 43.091183 | 34.383213 |
| 30.420119   | 7.870265   | 4.382755  | 3.046978  | 32.37982  | 14.138102 |
| 120.877387  | 37.146033  | 6.543432  | 5.253046  | 140.75078 | 121.81378 |
| 1960.320117 | 425.448225 | 10.507396 | 9.066043  | 2304.4915 | 2630.6892 |
| 1960.320117 | 425.448225 | 10.507396 | 9.066043  | 2304.4915 | 2630.6892 |
| 114.032624  | 33.982923  | 6.466938  | 5.244139  | 108.23882 | 75.253555 |
| 4991.5496   | 881.190125 | 11.740212 | 10.066983 | 3471.6458 | 2870.5928 |
| 4991.5496   | 881.190125 | 11.740212 | 10.066983 | 3471.6458 | 2870.5928 |
| 4991.5496   | 881.190125 | 11.740212 | 10.066983 | 3471.6458 | 2870.5928 |
| 4991.5496   | 881.190125 | 11.740212 | 10.066983 | 3471.6458 | 2870.5928 |
| 26.685079   | 8.898132   | 4.377106  | 3.228052  | 22.602362 | 21.54552  |
| 26.685079   | 8.898132   | 4.377106  | 3.228052  | 22.602362 | 21.54552  |
| 26.685079   | 8.898132   | 4.377106  | 3.228052  | 22.602362 | 21.54552  |
| 36.558511   | 11.118216  | 4.807245  | 3.705471  | 59.150547 | 19.261902 |
| 38.357729   | 7.220526   | 4.822283  | 3.010883  | 36.26363  | 16.37106  |
| 2090.693233 | 266.06498  | 10.501369 | 8.415453  | 3119.334  | 2959.4937 |
| 31.313444   | 6.264698   | 4.501661  | 2.757579  | 36.624954 | 53.22727  |
| 551.801183  | 143.450455 | 8.591384  | 7.345859  | 530.0662  | 263.91074 |
| 551.801183  | 143.450455 | 8.591384  | 7.345859  | 530.0662  | 263.91074 |
| 936.570662  | 144.462248 | 9.165306  | 7.325601  | 547.49884 | 402.05524 |
| 430.365267  | 131.415423 | 8.31005   | 7.279487  | 378.13397 | 426.58786 |
| 91.782202   | 26.400514  | 6.140853  | 4.962432  | 108.38679 | 105.13261 |
| 58.33407    | 13.880863  | 5.18815   | 4.003881  | 39.9807   | 15.839849 |
| 119.807889  | 17.185398  | 6.546201  | 4.339186  | 123.59412 | 90.594635 |
| 379.967563  | 23.461199  | 7.122745  | 3.509942  | 625.4194  | 788.8231  |
| 379.967563  | 23.461199  | 7.122745  | 3.509942  | 625.4194  | 788.8231  |
| 379.967563  | 23.461199  | 7.122745  | 3.509942  | 625.4194  | 788.8231  |
| 379.967563  | 23.461199  | 7.122745  | 3.509942  | 625.4194  | 788.8231  |
| 379.967563  | 23.461199  | 7.122745  | 3.509942  | 625.4194  | 788.8231  |
| 50.333266   | 14.892615  | 5.171331  | 4.150401  | 34.913563 | 24.23906  |
| 22.427806   | 6.222889   | 4.102582  | 2.895618  | 21.226168 | 25.829376 |
| 22.427806   | 6.222889   | 4.102582  | 2.895618  | 21.226168 | 25.829376 |
| 635.114442  | 172.271792 | 8.77621   | 7.533418  | 479.8107  | 288.56363 |
| 116.036537  | 33.927001  | 6.469632  | 5.334698  | 135.38298 | 144.07681 |
| 34.906434   | 9.568376   | 4.746984  | 3.354667  | 40.624386 | 44.70674  |
| 908.17266   | 93.937987  | 8.675972  | 6.735059  | 400.87244 | 336.01675 |
| 52.588298   | 12.295293  | 5.148129  | 3.916688  | 60.937458 | 89.770096 |
| 212.643362  | 19.684587  | 7.236823  | 4.546186  | 209.27873 | 96.63413  |
| 594.613518  | 85.100718  | 8.765575  | 6.720114  | 667.0389  | 865.0813  |
| 594.613518  | 85.100718  | 8.765575  | 6.720114  | 667.0389  | 865.0813  |
| 74.96026    | 27.65377   | 5.849185  | 4.811485  | 85.67026  | 85.37416  |
| 549.52166   | 38.40619   | 8.453357  | 5.522383  | 857.99725 | 967.81195 |
| 23.559959   | 7.745967   | 4.18201   | 3.056453  | 22.37207  | 10.69984  |
| 1258.290517 | 350.881634 | 9.808209  | 8.622199  | 902.78595 | 970.4417  |



|            |           |            |           |           |            |
|------------|-----------|------------|-----------|-----------|------------|
| 27.140553  | 14.0023   | 13.03001   | 15.696369 | 4.9999995 | 4.9999995  |
| 2642.0815  | 3959.3318 | 2092.1372  | 3323.8289 | 1009.0178 | 398.30917  |
| 19.369162  | 22.145544 | 39.893055  | 38.637344 | 12.367258 | 10.000041  |
| 1945.9205  | 4500.1265 | 3031.9705  | 4586.7656 | 876.86664 | 713.9443   |
| 49.2646    | 36.206955 | 51.083824  | 44.35578  | 18.069654 | 6.2871137  |
| 580.63245  | 50.014706 | 93.772354  | 77.829216 | 14.58235  | 16.59602   |
| 67.65658   | 64.64183  | 50.21684   | 65.1432   | 13.260829 | 7.1260695  |
| 67.65658   | 64.64183  | 50.21684   | 65.1432   | 13.260829 | 7.1260695  |
| 67.65658   | 64.64183  | 50.21684   | 65.1432   | 13.260829 | 7.1260695  |
| 67.65658   | 64.64183  | 50.21684   | 65.1432   | 13.260829 | 7.1260695  |
| 67.65658   | 64.64183  | 50.21684   | 65.1432   | 13.260829 | 7.1260695  |
| 230.26758  | 495.11115 | 2035.969   | 1755.2898 | 127.72277 | 169.91849  |
| 185.69312  | 560.59186 | 160.6693   | 387.72614 | 75.18758  | 75.05263   |
| 185.69312  | 560.59186 | 160.6693   | 387.72614 | 75.18758  | 75.05263   |
| 185.69312  | 560.59186 | 160.6693   | 387.72614 | 75.18758  | 75.05263   |
| 833.42773  | 1247.018  | 2031.7488  | 2141.6536 | 140.8621  | 181.90013  |
| 190.96881  | 220.04312 | 269.43945  | 311.89154 | 87.68435  | 57.733562  |
| 269.46936  | 97.69409  | 126.67162  | 149.15384 | 9.580966  | 5.1379037  |
| 23.12965   | 24.806192 | 23.621082  | 13.967148 | 7.3995724 | 4.9999995  |
| 60.533165  | 11.36771  | 35.90037   | 28.201546 | 9.277977  | 5.084067   |
| 96.80452   | 92.69031  | 117.44233  | 155.7626  | 40.97945  | 14.593278  |
| 1773.2217  | 1638.4423 | 1498.2333  | 1916.8427 | 331.98083 | 255.1202   |
| 1773.2217  | 1638.4423 | 1498.2333  | 1916.8427 | 331.98083 | 255.1202   |
| 120.031204 | 117.03628 | 115.487854 | 148.14803 | 38.598873 | 19.01997   |
| 3396.7795  | 4458.339  | 7488.9775  | 8262.963  | 1041.954  | 405.0116   |
| 3396.7795  | 4458.339  | 7488.9775  | 8262.963  | 1041.954  | 405.0116   |
| 3396.7795  | 4458.339  | 7488.9775  | 8262.963  | 1041.954  | 405.0116   |
| 3396.7795  | 4458.339  | 7488.9775  | 8262.963  | 1041.954  | 405.0116   |
| 26.185568  | 21.597954 | 26.111372  | 42.067696 | 10.609251 | 4.9999995  |
| 26.185568  | 21.597954 | 26.111372  | 42.067696 | 10.609251 | 4.9999995  |
| 26.185568  | 21.597954 | 26.111372  | 42.067696 | 10.609251 | 4.9999995  |
| 39.59421   | 41.57998  | 27.267504  | 32.49692  | 10.377052 | 8.388899   |
| 58.32171   | 24.865032 | 45.399     | 48.925945 | 9.014354  | 5.151454   |
| 2563.7424  | 1587.6163 | 944.0628   | 1369.9102 | 239.36502 | 220.6381   |
| 14.200449  | 42.066807 | 18.237633  | 23.523554 | 4.9999995 | 8.269627   |
| 741.2823   | 910.4559  | 285.85876  | 579.2332  | 180.12357 | 73.4247    |
| 741.2823   | 910.4559  | 285.85876  | 579.2332  | 180.12357 | 73.4247    |
| 665.55194  | 2296.8904 | 411.09735  | 1296.3302 | 83.648796 | 54.945526  |
| 257.28152  | 649.2621  | 337.75128  | 533.17487 | 149.76431 | 65.19156   |
| 101.548904 | 57.722267 | 93.73334   | 84.1693   | 33.018936 | 26.824274  |
| 63.469196  | 127.04979 | 16.9756    | 86.689285 | 11.754152 | 7.1887364  |
| 135.16493  | 121.08438 | 104.86449  | 143.54478 | 12.577131 | 11.471699  |
| 69.338646  | 9.545171  | 551.1985   | 235.48056 | 23.684843 | 4.9999995  |
| 69.338646  | 9.545171  | 551.1985   | 235.48056 | 23.684843 | 4.9999995  |
| 69.338646  | 9.545171  | 551.1985   | 235.48056 | 23.684843 | 4.9999995  |
| 69.338646  | 9.545171  | 551.1985   | 235.48056 | 23.684843 | 4.9999995  |
| 69.338646  | 9.545171  | 551.1985   | 235.48056 | 23.684843 | 4.9999995  |
| 35.308952  | 103.33629 | 38.34072   | 65.86101  | 13.298459 | 11.74649   |
| 17.41297   | 13.56739  | 24.18855   | 32.342384 | 6.9791346 | 6.670179   |
| 17.41297   | 13.56739  | 24.18855   | 32.342384 | 6.9791346 | 6.670179   |
| 688.24927  | 1113.4176 | 372.40005  | 868.2454  | 205.96603 | 68.54839   |
| 94.04755   | 74.61373  | 132.43079  | 115.66736 | 32.37604  | 21.41135   |
| 30.41502   | 21.756443 | 42.51107   | 29.424944 | 8.185029  | 4.9999995  |
| 387.15244  | 2835.2593 | 107.06803  | 1382.667  | 85.416695 | 142.6715   |
| 28.209291  | 81.97862  | 14.304423  | 40.3299   | 13.343161 | 10.941849  |
| 267.37103  | 368.02957 | 112.80491  | 221.7418  | 16.18585  | 13.748661  |
| 373.10452  | 386.92395 | 608.75854  | 666.7739  | 78.74722  | 74.75184   |
| 373.10452  | 386.92395 | 608.75854  | 666.7739  | 78.74722  | 74.75184   |
| 74.0477    | 45.800503 | 76.99405   | 81.874886 | 34.0356   | 11.636329  |
| 707.00574  | 178.86864 | 276.59558  | 308.8508  | 51.01129  | 60.529144  |
| 33.312363  | 28.00186  | 18.521631  | 28.45199  | 7.156559  | 5.350254   |
| 812.04175  | 2084.6921 | 1005.8459  | 1773.9357 | 412.88608 | 101.920494 |

|                  |                 |                  |                  |                 |                 |
|------------------|-----------------|------------------|------------------|-----------------|-----------------|
| 12.712511        | 4.9999995       | 4.9999995        | 5.17716          | 3.9345727       | 3.7589092       |
| 1883.7212        | 615.7081        | 911.51996        | 587.5044         | 10.970824       | 11.036021       |
| 4.9999995        | 14.58656        | 9.71089          | 7.9069257        | 4.4884305       | 5.108135        |
| 1002.87024       | 771.0187        | 1357.718         | 861.41156        | 11.0246725      | 11.413313       |
| 34.014175        | 16.832253       | 11.72325         | 9.084601         | 5.4492054       | 6.038421        |
| 19.89164         | 25.906084       | 16.768589        | 17.53365         | 7.9141436       | 5.0557775       |
| 9.597082         | 5.579149        | 14.10222         | 9.130694         | 5.780515        | 6.325285        |
| 9.597082         | 5.579149        | 14.10222         | 9.130694         | 5.780515        | 6.325285        |
| 9.597082         | 5.579149        | 14.10222         | 9.130694         | 5.780515        | 6.325285        |
| 9.597082         | 5.579149        | 14.10222         | 9.130694         | 5.780515        | 6.325285        |
| 9.597082         | 5.579149        | 14.10222         | 9.130694         | 5.780515        | 6.325285        |
| 78.55771         | 109.37683       | 339.1812         | 182.22997        | 8.625574        | 9.427729        |
| 67.75954         | 75.635475       | 59.86197         | 52.644352        | 7.5689297       | 8.024633        |
| 67.75954         | 75.635475       | 59.86197         | 52.644352        | 7.5689297       | 8.024633        |
| 67.75954         | 75.635475       | 59.86197         | 52.644352        | 7.5689297       | 8.024633        |
| 71.76428         | 228.61455       | 203.75114        | 172.97076        | 9.309738        | 9.505845        |
| 112.7563         | 68.397575       | 92.59609         | 61.905342        | 7.566424        | 8.03762         |
| 14.095072        | 8.559048        | 15.84898         | 13.296532        | 6.8944926       | 4.415666        |
| 14.95578         | 7.84061         | 4.9999995        | 10.30511         | 4.9704556       | 5.022216        |
| 14.669509        | 8.190039        | 4.9999995        | 4.9999995        | 4.5576544       | 3.852475        |
| 89.19609         | 35.979034       | 20.36686         | 21.761484        | 6.6840997       | 6.70318         |
| 424.78638        | 531.2593        | 579.2205         | 430.32214        | 10.695556       | 10.942325       |
| 424.78638        | 531.2593        | 579.2205         | 430.32214        | 10.695556       | 10.942325       |
| 66.35267         | 22.12261        | 36.41706         | 21.386354        | 6.3117275       | 6.0465374       |
| 1523.9691        | 870.37335       | 740.45807        | 705.37463        | 11.286921       | 11.067009       |
| 1523.9691        | 870.37335       | 740.45807        | 705.37463        | 11.286921       | 11.067009       |
| 1523.9691        | 870.37335       | 740.45807        | 705.37463        | 11.286921       | 11.067009       |
| 1523.9691        | 870.37335       | 740.45807        | 705.37463        | 11.286921       | 11.067009       |
| 11.072381        | 6.349895        | 14.291089        | 6.066175         | 4.0369625       | 4.3927336       |
| 11.072381        | 6.349895        | 14.291089        | 6.066175         | 4.0369625       | 4.3927336       |
| 11.072381        | 6.349895        | 14.291089        | 6.066175         | 4.0369625       | 4.3927336       |
| 8.870218         | 18.620491       | 12.817282        | 7.635352         | 5.4262314       | 4.251554        |
| 10.734108        | 4.9999995       | 8.423238         | 4.9999995        | 4.7162933       | 4.045841        |
| 227.65602        | 373.01624       | 257.27914        | 278.43536        | 11.130484       | 11.10604        |
| 4.9999995        | 9.318565        | 4.9999995        | 4.9999995        | 4.7294884       | 5.592175        |
| 287.96167        | 92.9807         | 131.81357        | 94.39852         | 8.565757        | 7.7784724       |
| 287.96167        | 92.9807         | 131.81357        | 94.39852         | 8.565757        | 7.7784724       |
| <b>89.705734</b> | <b>287.8901</b> | <b>159.21297</b> | <b>191.37036</b> | <b>8.613816</b> | <b>8.348345</b> |
| 235.99745        | 117.49762       | 116.948          | 103.0936         | 8.1036625       | 8.426911        |
| 36.274323        | 14.836959       | 27.39138         | 20.057215        | 6.3133197       | 6.4993467       |
| 9.279189         | 22.449163       | 17.637032        | 14.976903        | 4.860441        | 4.004207        |
| 13.55842         | 29.58731        | 19.440622        | 16.477207        | 6.4979596       | 6.2950754       |
| 96.79406         | 5.2882934       | 4.9999995        | 4.9999995        | 8.813105        | 9.289527        |
| 96.79406         | 5.2882934       | 4.9999995        | 4.9999995        | 8.813105        | 9.289527        |
| 96.79406         | 5.2882934       | 4.9999995        | 4.9999995        | 8.813105        | 9.289527        |
| 96.79406         | 5.2882934       | 4.9999995        | 4.9999995        | 8.813105        | 9.289527        |
| 96.79406         | 5.2882934       | 4.9999995        | 4.9999995        | 8.813105        | 9.289527        |
| 22.10957         | 17.000092       | 10.3925905       | 14.80849         | 4.665109        | 4.5563664       |
| 5.5717106        | 7.431926        | 5.684382         | 4.9999995        | 3.9485388       | 4.6426964       |
| 5.5717106        | 7.431926        | 5.684382         | 4.9999995        | 3.9485388       | 4.6426964       |
| 377.12997        | 87.43064        | 184.79266        | 109.76306        | 8.428621        | 7.9020243       |
| 56.837345        | 26.279224       | 32.8964          | 33.761646        | 6.6298532       | 6.9382973       |
| 12.387219        | 12.20949        | 12.43072         | 7.1977983        | 4.8810954       | 5.3637314       |
| 28.063381        | 146.14001       | 71.3274          | 90.008934        | 8.188149        | 8.10952         |
| 12.49364         | 12.356279       | 12.27389         | 12.36294         | 5.4708495       | 6.2842546       |
| 29.5532          | 25.886732       | 17.197847        | 15.535232        | 7.255569        | 6.37757         |
| 67.97239         | 76.40599        | 130.0395         | 82.68737         | 8.911175        | 9.422739        |
| 67.97239         | 76.40599        | 130.0395         | 82.68737         | 8.911175        | 9.422739        |
| 62.033768        | 12.000501       | 28.48401         | 17.732412        | 5.9674797       | 6.219793        |
| 30.749327        | 30.974737       | 28.177143        | 28.995499        | 9.281862        | 9.579651        |
| 8.861109         | 4.9999995       | 15.107879        | 4.9999995        | 4.0217915       | 3.487864        |
| 697.1309         | 301.35797       | 321.01038        | 270.98398        | 9.348302        | 9.581283        |

|                 |                 |                 |                 |                  |                 |
|-----------------|-----------------|-----------------|-----------------|------------------|-----------------|
| 4.4530163       | 3.229476        | 3.6422966       | 3.5526924       | 2.3467326        | 2.4279919       |
| 11.00899        | 11.6064625      | 10.746457       | 11.079502       | 10.289848        | 9.503888        |
| 3.953847        | 3.969763        | 5.1584783       | 4.800864        | 3.857448         | 4.104079        |
| 10.569022       | 11.7914         | 11.268146       | 11.555522       | 10.08823         | 10.331934       |
| 5.306449        | 4.7449207       | 5.497911        | 4.9893017       | 4.4136496        | 3.4039397       |
| 8.820725        | 5.251429        | 6.340445        | 5.771427        | 4.096079         | 4.8677244       |
| 5.7719064       | 5.6419253       | 5.4734282       | 5.515151        | 3.9568033        | 3.5945632       |
| 5.7719064       | 5.6419253       | 5.4734282       | 5.515151        | 3.9568033        | 3.5945632       |
| 5.7719064       | 5.6419253       | 5.4734282       | 5.515151        | 3.9568033        | 3.5945632       |
| 5.7719064       | 5.6419253       | 5.4734282       | 5.515151        | 3.9568033        | 3.5945632       |
| 5.7719064       | 5.6419253       | 5.4734282       | 5.515151        | 3.9568033        | 3.5945632       |
| 7.5247645       | 8.639454        | 10.703518       | 10.185821       | 7.230088         | 8.255551        |
| 7.2154703       | 8.808239        | 7.103531        | 8.0264435       | 6.457227         | 7.0756          |
| 7.2154703       | 8.808239        | 7.103531        | 8.0264435       | 6.457227         | 7.0756          |
| 7.2154703       | 8.808239        | 7.103531        | 8.0264435       | 6.457227         | 7.0756          |
| 9.351081        | 9.967498        | 10.699966       | 10.466457       | 7.367026         | 8.35696         |
| 7.2560787       | 7.470888        | 7.831473        | 7.7361064       | 6.684647         | 6.70329         |
| 7.7381287       | 6.258562        | 6.763799        | 6.6943846       | 3.4792402        | 3.0907724       |
| 4.2227345       | 4.152633        | 4.452562        | 3.388782        | 3.0812142        | 2.4279919       |
| 5.6084337       | 2.9032662       | 5.012658        | 4.3620405       | 3.427131         | 3.076306        |
| 6.2738523       | 6.18273         | 6.656803        | 6.7599277       | 5.592544         | 4.6777444       |
| 10.432134       | 10.374018       | 10.278591       | 10.32175        | 8.643317         | 8.85311         |
| 10.432134       | 10.374018       | 10.278591       | 10.32175        | 8.643317         | 8.85311         |
| 6.586121        | 6.5378366       | 6.633688        | 6.68572         | 5.5032907        | 5.07296         |
| 11.362432       | 11.771961       | 12.555501       | 12.397449       | 10.333155        | 9.529542        |
| 11.362432       | 11.771961       | 12.555501       | 12.397449       | 10.333155        | 9.529542        |
| 11.362432       | 11.771961       | 12.555501       | 12.397449       | 10.333155        | 9.529542        |
| 11.362432       | 11.771961       | 12.555501       | 12.397449       | 10.333155        | 9.529542        |
| 4.4002595       | 3.9299695       | 4.587537        | 4.9151745       | 3.6341178        | 2.4279919       |
| 4.4002595       | 3.9299695       | 4.587537        | 4.9151745       | 3.6341178        | 2.4279919       |
| 4.4002595       | 3.9299695       | 4.587537        | 4.9151745       | 3.6341178        | 2.4279919       |
| 4.9926424       | 4.962196        | 4.64349         | 4.567354        | 3.6028914        | 3.8382626       |
| 5.550839        | 4.156689        | 5.339569        | 5.124469        | 3.386055         | 3.093895        |
| 10.973277       | 10.330931       | 9.633047        | 9.8344345       | 8.153923         | 8.641392        |
| 3.5030398       | 4.981494        | 4.0964947       | 4.107277        | 2.3467326        | 3.8159783       |
| 9.185588        | 9.51058         | 7.914412        | 8.593494        | 7.745798         | 7.043944        |
| 9.185588        | 9.51058         | 7.914412        | 8.593494        | 7.745798         | 7.043944        |
| <b>9.011743</b> | <b>10.83495</b> | <b>8.422269</b> | <b>9.760712</b> | <b>6.6106086</b> | <b>6.631062</b> |
| 7.673708        | 9.030386        | 8.145838        | 8.479794        | 7.4645443        | 6.8803277       |
| 6.3483076       | 5.4676833       | 6.3394814       | 5.8769794       | 5.274919         | 5.580175        |
| 5.682138        | 6.6593595       | 4.0043583       | 5.918398        | 3.7846107        | 3.6080103       |
| 6.7538023       | 6.588646        | 6.4987645       | 6.6429596       | 3.8804686        | 4.3107786       |
| 5.805438        | 2.6431284       | 8.84956         | 7.335711        | 4.8063755        | 2.4279919       |
| 5.805438        | 2.6431284       | 8.84956         | 7.335711        | 4.8063755        | 2.4279919       |
| 5.805438        | 2.6431284       | 8.84956         | 7.335711        | 4.8063755        | 2.4279919       |
| 5.805438        | 2.6431284       | 8.84956         | 7.335711        | 4.8063755        | 2.4279919       |
| 5.805438        | 2.6431284       | 8.84956         | 7.335711        | 4.8063755        | 2.4279919       |
| 4.825527        | 6.340822        | 5.107203        | 5.5329585       | 3.961549         | 4.345438        |
| 3.8016653       | 3.1775806       | 4.4836073       | 4.5614047       | 2.9984167        | 3.4975178       |
| 3.8016653       | 3.1775806       | 4.4836073       | 4.5614047       | 2.9984167        | 3.4975178       |
| 9.065356        | 9.798503        | 8.28551         | 9.177244        | 7.9314446        | 6.9494414       |
| 6.232277        | 5.861451        | 6.8245177       | 6.331398        | 5.2476974        | 5.251569        |
| 4.6186566       | 3.940665        | 5.252078        | 4.4256787       | 3.236695         | 2.4279919       |
| 8.247144        | 11.136646       | 6.527737        | 9.846637        | 6.6441875        | 8.007623        |
| 4.5086327       | 5.9986544       | 3.767781        | 4.858601        | 3.965542         | 4.242084        |
| 7.7271056       | 8.202548        | 6.6030097       | 7.255137        | 4.249222         | 4.58448         |
| 8.19394         | 8.276066        | 8.986283        | 8.803245        | 6.523743         | 7.0678725       |
| 8.19394         | 8.276066        | 8.986283        | 8.803245        | 6.523743         | 7.0678725       |
| 5.895338        | 5.111562        | 6.0629215       | 5.8380156       | 5.3201237        | 4.3307014       |
| 9.111173        | 7.1583014       | 7.8667803       | 7.7223754       | 5.9094243        | 6.7742696       |
| 4.7454233       | 4.342375        | 4.1188745       | 4.375734        | 3.0326693        | 3.1529326       |
| 9.310479        | 10.694319       | 9.713501        | 10.201367       | 8.946791         | 7.5214567       |

|                 |                  |                  |                 |
|-----------------|------------------|------------------|-----------------|
| 3.7490194       | 2.3408759        | 2.3618152        | 2.64752         |
| 10.82003        | 9.73262          | 10.078104        | 9.745923        |
| 2.350709        | 4.0013022        | 3.5612116        | 3.2558897       |
| 9.904636        | 10.059139        | 10.666222        | 10.326158       |
| 5.100188        | 4.214951         | 3.8262122        | 3.463544        |
| 4.356949        | 4.886185         | 4.3416862        | 4.454823        |
| 3.3752956       | 2.5986176        | 4.0893188        | 3.4707363       |
| 3.3752956       | 2.5986176        | 4.0893188        | 3.4707363       |
| 3.3752956       | 2.5986176        | 4.0893188        | 3.4707363       |
| 3.3752956       | 2.5986176        | 4.0893188        | 3.4707363       |
| 3.3752956       | 2.5986176        | 4.0893188        | 3.4707363       |
| 6.260869        | 7.117462         | 8.643317         | 8.019993        |
| 6.061576        | 6.561231         | 6.170115         | 6.1481705       |
| 6.061576        | 6.561231         | 6.170115         | 6.1481705       |
| 6.061576        | 6.561231         | 6.170115         | 6.1481705       |
| 6.136952        | 8.247144         | 7.9212956        | 7.937844        |
| 6.7802334       | 6.404502         | 6.784346         | 6.397729        |
| 3.887465        | 3.192993         | 4.25739          | 4.042673        |
| 3.9674692       | 3.0586014        | 2.3618152        | 3.6580207       |
| 3.9411843       | 3.1226819        | 2.3618152        | 2.352752        |
| 6.4472156       | 5.400522         | 4.613391         | 4.7868567       |
| 8.683948        | 9.511481         | 9.410817         | 9.293583        |
| 8.683948        | 9.511481         | 9.410817         | 9.293583        |
| 6.030771        | 4.637021         | 5.4599223        | 4.76087         |
| 10.512869       | 10.244089        | 9.760712         | 10.021529       |
| 10.512869       | 10.244089        | 9.760712         | 10.021529       |
| 10.512869       | 10.244089        | 9.760712         | 10.021529       |
| 10.512869       | 10.244089        | 9.760712         | 10.021529       |
| 3.5671906       | 2.7695398        | 4.108478         | 2.8609965       |
| 3.5671906       | 2.7695398        | 4.108478         | 2.8609965       |
| 3.5671906       | 2.7695398        | 4.108478         | 2.8609965       |
| 3.268405        | 4.368171         | 3.955556         | 3.1995404       |
| 3.5244231       | 2.3408759        | 3.3672965        | 2.352752        |
| 7.7731857       | 9.000512         | 8.26203          | 8.661674        |
| 2.350709        | 3.3174844        | 2.3618152        | 2.352752        |
| 8.11505         | 6.8686066        | 7.28551          | 7.0162473       |
| 8.11505         | 6.8686066        | 7.28551          | 7.0162473       |
| <b>6.456397</b> | <b>8.6130705</b> | <b>7.5456038</b> | <b>8.096863</b> |
| 7.8293486       | 7.2309523        | 7.121126         | 7.150624        |
| 5.1851177       | 4.027316         | 5.048232         | 4.658831        |
| 3.332369        | 4.6611667        | 4.414396         | 4.2227345       |
| 3.8357491       | 5.095924         | 4.5463896        | 4.3658075       |
| 6.5592103       | 2.5515056        | 2.3618152        | 2.352752        |
| 6.5592103       | 2.5515056        | 2.3618152        | 2.352752        |
| 6.5592103       | 2.5515056        | 2.3618152        | 2.352752        |
| 6.5592103       | 2.5515056        | 2.3618152        | 2.352752        |
| 6.5592103       | 2.5515056        | 2.3618152        | 2.352752        |
| 4.5005097       | 4.2291527        | 3.659387         | 4.206368        |
| 2.7008371       | 2.983921         | 2.8402622        | 2.352752        |
| 2.7008371       | 2.983921         | 2.8402622        | 2.352752        |
| 8.511303        | 6.7814245        | 7.779081         | 7.2478113       |
| 5.817466        | 4.907438         | 5.30984          | 5.4741764       |
| 3.714735        | 3.7257423        | 3.9118285        | 3.1110115       |
| 4.831638        | 7.5653086        | 6.4202304        | 6.941366        |
| 3.7249858       | 3.7428057        | 3.8944898        | 3.93022         |
| 4.903884        | 4.885249         | 4.376144         | 4.278139        |
| 6.0653067       | 6.576402         | 7.2674937        | 6.8198676       |
| 6.0653067       | 6.576402         | 7.2674937        | 6.8198676       |
| 5.9400697       | 3.6965852        | 5.1088867        | 4.472545        |
| 4.9573803       | 5.163886         | 5.091035         | 5.238302        |
| 3.2673018       | 2.3408759        | 4.192189         | 2.352752        |
| 9.390692        | 8.687897         | 8.566363         | 8.619994        |

|               |             |             |            |    |           |
|---------------|-------------|-------------|------------|----|-----------|
| ASHGA5P043242 | 0.020856138 | 0.088872205 | 2.2752255  | up | noncoding |
| ASHGA5P032536 | 0.049117452 | 0.1440311   | 3.9706496  | up | noncoding |
| ASHGA5P038081 | 0.00111953  | 0.022608782 | 4.8684154  | up | noncoding |
| ASHGA5P038081 | 0.00111953  | 0.022608782 | 4.8684154  | up | noncoding |
| ASHGA5P038081 | 0.00111953  | 0.022608782 | 4.8684154  | up | noncoding |
| ASHGA5P018764 | 0.000639658 | 0.017037535 | 5.0773539  | up | noncoding |
| ASHGA5P035475 | 1.11203E-05 | 0.004010044 | 7.1071469  | up | noncoding |
| ASHGA5P016921 | 0.000953749 | 0.021003113 | 3.9420906  | up | noncoding |
| ASHGA5P048053 | 0.000166843 | 0.011182026 | 2.62284    | up | noncoding |
| ASHGA5P046681 | 0.003153485 | 0.036407477 | 3.7319341  | up | noncoding |
| ASHGA5P030019 | 0.006557425 | 0.051498397 | 2.458728   | up | noncoding |
| ASHGA5P055800 | 0.000409363 | 0.014460542 | 2.3999577  | up | noncoding |
| ASHGA5P055866 | 0.002777068 | 0.034115169 | 3.4025846  | up | noncoding |
| ASHGA5P025629 | 0.009629409 | 0.060887465 | 2.4412165  | up | noncoding |
| ASHGA5P014877 | 0.001173357 | 0.0230268   | 2.4589675  | up | noncoding |
| ASHGA5P038690 | 0.000327976 | 0.013141059 | 3.3692734  | up | noncoding |
| ASHGA5P031686 | 0.0095397   | 0.060604099 | 4.1193547  | up | noncoding |
| ASHGA5P034007 | 0.004134968 | 0.041062628 | 2.523383   | up | noncoding |
| ASHGA5P026664 | 0.013786063 | 0.071982793 | 2.0067368  | up | noncoding |
| ASHGA5P014247 | 0.014135261 | 0.072947894 | 2.1577486  | up | noncoding |
| ASHGA5P014247 | 0.014135261 | 0.072947894 | 2.1577486  | up | noncoding |
| ASHGA5P014247 | 0.014135261 | 0.072947894 | 2.1577486  | up | noncoding |
| ASHGA5P014247 | 0.014135261 | 0.072947894 | 2.1577486  | up | noncoding |
| ASHGA5P014247 | 0.014135261 | 0.072947894 | 2.1577486  | up | noncoding |
| ASHGA5P023120 | 0.003416172 | 0.037690616 | 2.3557256  | up | noncoding |
| ASHGA5P056347 | 8.41892E-05 | 0.008738697 | 6.1091287  | up | noncoding |
| ASHGA5P033820 | 0.025788014 | 0.100086328 | 2.0009534  | up | noncoding |
| ASHGA5P035735 | 0.002125544 | 0.030380707 | 4.8160307  | up | noncoding |
| ASHGA5P035735 | 0.002125544 | 0.030380707 | 4.8160307  | up | noncoding |
| ASHGA5P007789 | 0.029906939 | 0.108404427 | 2.7574114  | up | noncoding |
| ASHGA5P053608 | 0.020493826 | 0.087825608 | 2.1395082  | up | noncoding |
| ASHGA5P048394 | 0.000612936 | 0.016760351 | 2.2054124  | up | noncoding |
| ASHGA5P048394 | 0.000612936 | 0.016760351 | 2.2054124  | up | noncoding |
| ASHGA5P048394 | 0.000612936 | 0.016760351 | 2.2054124  | up | noncoding |
| ASHGA5P048394 | 0.000612936 | 0.016760351 | 2.2054124  | up | noncoding |
| ASHGA5P033959 | 0.015975452 | 0.077348    | 3.1941152  | up | noncoding |
| ASHGA5P050948 | 0.003874809 | 0.039898314 | 2.4393848  | up | noncoding |
| ASHGA5P018194 | 0.00033896  | 0.013255256 | 8.4584532  | up | noncoding |
| ASHGA5P018194 | 0.00033896  | 0.013255256 | 8.4584532  | up | noncoding |
| ASHGA5P018194 | 0.00033896  | 0.013255256 | 8.4584532  | up | noncoding |
| ASHGA5P018194 | 0.00033896  | 0.013255256 | 8.4584532  | up | noncoding |
| ASHGA5P047340 | 0.001187572 | 0.023096268 | 2.8997013  | up | noncoding |
| ASHGA5P037355 | 0.01616481  | 0.077740057 | 6.4395396  | up | noncoding |
| ASHGA5P026794 | 0.003255551 | 0.036951034 | 2.1287235  | up | noncoding |
| ASHGA5P026794 | 0.003255551 | 0.036951034 | 2.1287235  | up | noncoding |
| ASHGA5P032812 | 0.024534476 | 0.097200103 | 17.4824588 | up | noncoding |
| ASHGA5P022885 | 0.046036201 | 0.138218388 | 2.3123502  | up | noncoding |
| ASHGA5P046834 | 0.005774767 | 0.048306083 | 6.0477946  | up | noncoding |
| ASHGA5P021725 | 0.000653946 | 0.017168766 | 2.0792399  | up | noncoding |
| ASHGA5P021725 | 0.000653946 | 0.017168766 | 2.0792399  | up | noncoding |
| ASHGA5P021725 | 0.000653946 | 0.017168766 | 2.0792399  | up | noncoding |
| ASHGA5P031178 | 0.000484002 | 0.015384974 | 23.4623194 | up | noncoding |
| ASHGA5P044309 | 9.83814E-05 | 0.009080764 | 2.2332406  | up | noncoding |
| ASHGA5P042272 | 6.00609E-05 | 0.007803818 | 2.4247994  | up | noncoding |
| ASHGA5P042272 | 6.00609E-05 | 0.007803818 | 2.4247994  | up | noncoding |
| ASHGA5P031284 | 0.000624882 | 0.016926568 | 4.0532154  | up | noncoding |
| ASHGA5P037709 | 0.008073421 | 0.056530276 | 3.4161706  | up | noncoding |
| ASHGA5P021185 | 0.031021831 | 0.110553198 | 2.1002003  | up | noncoding |
| ASHGA5P021185 | 0.031021831 | 0.110553198 | 2.1002003  | up | noncoding |
| ASHGA5P021185 | 0.031021831 | 0.110553198 | 2.1002003  | up | noncoding |
| ASHGA5P037031 | 0.005664275 | 0.047783478 | 3.4713843  | up | noncoding |
| ASHGA5P042987 | 0.000181327 | 0.011439647 | 2.7169309  | up | noncoding |

|                 |               |                     |      |       |   |
|-----------------|---------------|---------------------|------|-------|---|
| uc010lhv.1      | AK091729      | UCSC_knowngene      | 1986 | chr7  | - |
| ENST00000508851 | RP11-893F2.9  | GENCODE             | 750  | chr17 | - |
| NR_004428       | EGOT          | RefSeq              | 1529 | chr3  | - |
| NR_004428       | EGOT          | RefSeq              | 1529 | chr3  | - |
| NR_004428       | EGOT          | RefSeq              | 1529 | chr3  | - |
| ENST00000457407 | AC093388.3    | GENCODE             | 404  | chr2  | + |
| ENST00000436557 | AC008174.3    | GENCODE             | 689  | chr2  | - |
| ENST00000435718 | RP4-564F22.2  | GENCODE             | 261  | chr20 | - |
| ENST00000446167 | RP11-7O11.3   | GENCODE             | 486  | chr1  | - |
| ENST00000440604 | RP11-308D16.4 | GENCODE             | 729  | chrX  | + |
| ENST00000558372 | CTD-3110H11.1 | GENCODE             | 612  | chr15 | - |
| ENST00000416599 | RP11-64P12.8  | GENCODE             | 3494 | chr13 | - |
| TCONS_00003943  | XLOC_001757   | LincRNAs identified | 314  | chr2  | + |
| NR_015410       | LINC00340     | RefSeq              | 1904 | chr6  | + |
| NR_038200       | M1            | RefSeq              | 554  | chr10 | - |
| ENST00000326237 | AC034193.5    | GENCODE             | 2882 | chr3  | + |
| ENST00000576745 | RP11-388M20.9 | GENCODE             | 1201 | chr16 | + |
| ENST00000453935 | RP4-669L17.4  | GENCODE             | 498  | chr1  | + |
| ENST00000447748 | RP11-182I10.3 | GENCODE             | 2804 | chr1  | - |
| NR_073005       | DUS4L         | RefSeq              | 2012 | chr7  | + |
| NR_073005       | DUS4L         | RefSeq              | 2012 | chr7  | + |
| NR_073005       | DUS4L         | RefSeq              | 2012 | chr7  | + |
| NR_073005       | DUS4L         | RefSeq              | 2012 | chr7  | + |
| NR_073005       | DUS4L         | RefSeq              | 2012 | chr7  | + |
| uc003tez.3      | BC043264      | UCSC_knowngene      | 1729 | chr7  | + |
| TCONS_00003615  | XLOC_001406   | LincRNAs identified | 2194 | chr2  | + |
| ENST00000579160 | RP11-746B8.1  | GENCODE             | 387  | chr18 | + |
| uc002rcs.1      | AX748233      | UCSC_knowngene      | 2612 | chr2  | + |
| uc002rcs.1      | AX748233      | UCSC_knowngene      | 2612 | chr2  | + |
| uc002tfj.3      | BC113052      | UCSC_knowngene      | 1412 | chr2  | + |
| NR_036490       | LOC284648     | RefSeq              | 1504 | chr1  | + |
| ENST00000526310 | RP11-864G5.3  | GENCODE             | 628  | chr11 | - |
| ENST00000526310 | RP11-864G5.3  | GENCODE             | 628  | chr11 | - |
| ENST00000526310 | RP11-864G5.3  | GENCODE             | 628  | chr11 | - |
| ENST00000526310 | RP11-864G5.3  | GENCODE             | 628  | chr11 | - |
| TCONS_00003103  | XLOC_001850   | LincRNAs identified | 228  | chr2  | + |
| NR_049777       | SRG7          | RefSeq              | 476  | chr1  | + |
| ENST00000450469 | RP4-784A16.3  | GENCODE             | 237  | chr1  | - |
| ENST00000450469 | RP4-784A16.3  | GENCODE             | 237  | chr1  | - |
| ENST00000450469 | RP4-784A16.3  | GENCODE             | 237  | chr1  | - |
| ENST00000450469 | RP4-784A16.3  | GENCODE             | 237  | chr1  | - |
| TCONS_00017432  | XLOC_008014   | LincRNAs identified | 1773 | chrX  | + |
| ENST00000456880 | AP001065.2    | GENCODE             | 2056 | chr21 | - |
| ENST00000546273 | RP11-713B9.1  | GENCODE             | 301  | chr11 | + |
| ENST00000546273 | RP11-713B9.1  | GENCODE             | 301  | chr11 | + |
| TCONS_00029017  | XLOC_013940   | LincRNAs identified | 447  | chr21 | + |
| ENST00000564598 | RP11-20I23.12 | GENCODE             | 551  | chr16 | - |
| ENST00000422807 | RP11-445N18.5 | GENCODE             | 535  | chr10 | - |
| ENST00000539303 | SNHG1         | GENCODE             | 240  | chr11 | - |
| ENST00000539303 | SNHG1         | GENCODE             | 240  | chr11 | - |
| ENST00000539303 | SNHG1         | GENCODE             | 240  | chr11 | - |
| ENST00000560208 | CRNDE         | GENCODE             | 735  | chr16 | - |
| ENST00000521127 | SNHG6         | GENCODE             | 560  | chr8  | - |
| ENST00000433182 | E2F3-IT1      | GENCODE             | 400  | chr6  | + |
| ENST00000433182 | E2F3-IT1      | GENCODE             | 400  | chr6  | + |
| ENST00000444470 | GAS5          | GENCODE             | 424  | chr1  | - |
| ENST00000415054 | RP1-85F18.6   | GENCODE             | 357  | chr22 | - |
| NR_040008       | CAPN1         | RefSeq              | 3040 | chr11 | + |
| NR_040008       | CAPN1         | RefSeq              | 3040 | chr11 | + |
| NR_040008       | CAPN1         | RefSeq              | 3040 | chr11 | + |
| ENST00000429167 | FAM83C-AS1    | GENCODE             | 352  | chr20 | + |
| uc003tdf.1      | RP9P          | UCSC_knowngene      | 3348 | chr7  | - |

|           |           |                    |                             |                       |
|-----------|-----------|--------------------|-----------------------------|-----------------------|
| 100893615 | 100895601 |                    | TCCACAGGCATAGAATCCATGTGAC   | exon sense-overlappi  |
| 48358937  | 48365216  |                    | TGGAAGTGTGGTGTGATTGACTT     | intergenic            |
| 4790877   | 4793274   |                    | TAGCTATTTGCC# 100126791     | intronic antisense    |
| 4790877   | 4793274   |                    | TAGCTATTTGCC# 100126791     | intronic antisense    |
| 4790877   | 4793274   |                    | TAGCTATTTGCC# 100126791     | intronic antisense    |
| 191399580 | 191432828 |                    | GATGGCACTATGGAAAGTAGCTAA#   | bidirectional         |
| 186648417 | 186664877 |                    | GCTTGCTATGAAAGATTCAAGTGAT   | natural antisense     |
| 37049531  | 37059692  |                    | TTCAGTGGCTGTTGCAGAGGAAGAG   | intergenic            |
| 44410041  | 44411974  | ENST00000412378    | TAAGTCTTTGGGAGCCAGAAGGGCT   | bidirectional         |
| 136075712 | 136103777 |                    | CTTGTGATTACTTGCTCAGAAGTTAC  | intergenic            |
| 50651646  | 50652391  |                    | GGTTCTTCTGACTCCCTTCATCTGTG  | intergenic            |
| 52741843  | 52768600  | uc001vgl.1         | CATCTTTCCAGGACAAAAATAATA    | intergenic            |
| 173188049 | 173232618 |                    | TAAACCACAGTTTGTATCTCAGTTA#  | intergenic            |
| 21666674  | 22194616  | uc011djk.2         | ATCGCTGGGAAT# 401237        | intergenic            |
| 61496747  | 61513203  | NR_038199          | GATTAATTCAGG# 100507027     | intergenic            |
| 10028594  | 10046928  |                    | ACCAATGTGCCACCATGGATATTCA#  | natural antisense     |
| 31237280  | 31238481  |                    | TAGCTAAGGGATTATTTGGTTGTAA#  | intergenic            |
| 450886    | 453942    | ENST00000438217    | GCGTCGTTGGATGCTGTATGACAAT#  | intergenic            |
| 65437907  | 65458695  |                    | GCATACACCCTATCAGGGTCTAAAA#  | intergenic            |
| 107204401 | 107218968 | NR_073003, NR_07.  | TACCACAAATCA# 11062         | exon sense-overlappi  |
| 107204401 | 107218968 | NR_073003, NR_07.  | TACCACAAATCA# 11062         | exon sense-overlappi  |
| 107204401 | 107218968 | NR_073003, NR_07.  | TACCACAAATCA# 11062         | natural antisense     |
| 107204401 | 107218968 | NR_073003, NR_07.  | TACCACAAATCA# 11062         | natural antisense     |
| 107204401 | 107218968 | NR_073003, NR_07.  | TACCACAAATCA# 11062         | natural antisense     |
| 36134922  | 36140262  |                    | AATGGAGAAAAGCGTGGAAATGCTCT# | intergenic            |
| 27938797  | 27978571  |                    | TCTGATGAAGCTCTCCTTTGGAGTA#  | intergenic            |
| 30415062  | 30416276  |                    | CATCTGGAAAAACAAGCAAAGCTC#   | intergenic            |
| 17935161  | 17937773  |                    | GACATCAATATACTTATTCATTATA#  | exon sense-overlappi  |
| 17935161  | 17937773  |                    | GACATCAATATACTTATTCATTATA#  | exon sense-overlappi  |
| 110745137 | 110752147 | NR_046111, uc002tf | TCTATCAAAGTTTGAAGGTTTCATT#  | intergenic            |
| 182584274 | 182585764 |                    | TGCTCCGAAGCT# 284648        | intergenic            |
| 102100581 | 102101653 |                    | TACAATAACCATCCCAAGCTACAAC#  | natural antisense     |
| 102100581 | 102101653 |                    | TACAATAACCATCCCAAGCTACAAC#  | natural antisense     |
| 102100581 | 102101653 |                    | TACAATAACCATCCCAAGCTACAAC#  | natural antisense     |
| 102100581 | 102101653 |                    | TACAATAACCATCCCAAGCTACAAC#  | natural antisense     |
| 216444129 | 216447358 |                    | CTTGCCGTCCTTGATTTAGCTAGC#   | intergenic            |
| 109399838 | 109400962 |                    | CAATCAGCTTTG# 642864        | intronic antisense    |
| 53757462  | 53757810  |                    | CCCAGAACTGGACAGGGAAGAAA#    | intron sense-overlapp |
| 53757462  | 53757810  |                    | CCCAGAACTGGACAGGGAAGAAA#    | intron sense-overlapp |
| 53757462  | 53757810  |                    | CCCAGAACTGGACAGGGAAGAAA#    | intron sense-overlapp |
| 53757462  | 53757810  |                    | CCCAGAACTGGACAGGGAAGAAA#    | intron sense-overlapp |
| 73045949  | 73047819  | NR_003255          | TACTTGAGTTCTGGGTTTTACTGCAC# | intergenic            |
| 45834477  | 45836623  |                    | CAGCCACCTATTTTGTACTCCTTGTT# | intronic antisense    |
| 115045696 | 115046044 |                    | AGGAATGAAAGTTTCACACAGATTC#  | natural antisense     |
| 115045696 | 115046044 |                    | AGGAATGAAAGTTTCACACAGATTC#  | natural antisense     |
| 40383132  | 40386878  |                    | ACGAATCAGCAAACAAAGGAGAAA#   | intergenic            |
| 2688691   | 2723398   |                    | CACCTAGCTGATTCTTGATGACATT#  | intergenic            |
| 45659675  | 45676875  |                    | GAGAGTGCCCTGAAATATTTGAAAT#  | intergenic            |
| 62621044  | 62622646  |                    | TCAGAGCTGAGA# 23642         | bidirectional         |
| 62621044  | 62622646  |                    | TCAGAGCTGAGA# 23642         | bidirectional         |
| 62621044  | 62622646  |                    | TCAGAGCTGAGA# 23642         | bidirectional         |
| 54958770  | 54963061  |                    | ATTATTGATAAT# 643911        | intergenic            |
| 67834505  | 67837776  |                    | AATTACTGACAT# 641638        | intergenic            |
| 20438051  | 20440409  |                    | CTCCACTTACTACATATCAAGGATT#  | intron sense-overlapp |
| 20438051  | 20440409  |                    | CTCCACTTACTACATATCAAGGATT#  | intron sense-overlapp |
| 173833091 | 173834043 | ENST00000422207,   | GGAGATTTTGGA# 60674         | intergenic            |
| 41565193  | 41579148  |                    | CTGGCACATACACATCAATCAGTAT#  | natural antisense     |
| 64949303  | 64979477  |                    | TTCTCCAAGACC 823            | exon sense-overlappi  |
| 64949303  | 64979477  |                    | TTCTCCAAGACC 823            | exon sense-overlappi  |
| 64949303  | 64979477  |                    | TTCTCCAAGACC 823            | exon sense-overlappi  |
| 33873053  | 33873559  |                    | CTCTCAAAGTTCAGGATACACCAG#   | natural antisense     |
| 32961114  | 32982159  |                    | TCTGGGACCTTAC 441212        | intronic antisense    |

|                 |          |                          |           |           |
|-----------------|----------|--------------------------|-----------|-----------|
| ENST00000474120 | FIS1     | fission 1 (mitochondri-  | 100882874 | 100895597 |
| NM_001099952    | ITPR1    | inositol 1,4,5-trispho + | 4535031   | 4889524   |
| NM_001168272    | ITPR1    | inositol 1,4,5-trispho + | 4535031   | 4889524   |
| NM_002222       | ITPR1    | inositol 1,4,5-trispho + | 4535031   | 4889524   |
| NM_001142645    | TMEM194B | transmembrane prote -    | 191371618 | 191399468 |
| NM_173651       | FSIP2    | fibrous sheath-interac + | 186603354 | 186698016 |
| NM_014652       | IPO13    | importin-13 +            | 44412477  | 44433694  |
| ENST00000245046 | EMC3     | ER membrane protei -     | 10004220  | 10028804  |
| NM_001270419    | DUS4L    | tRNA-dihydrouridine +    | 107204401 | 107218968 |
| NM_181581       | DUS4L    | tRNA-dihydrouridine +    | 107204401 | 107218968 |
| NM_001161520    | COG5     | conserved oligomeric -   | 106848297 | 107204959 |
| NM_006348       | COG5     | conserved oligomeric -   | 106842188 | 107204959 |
| NM_181733       | COG5     | conserved oligomeric -   | 106842188 | 107204959 |
| NM_001130009    | GEN1     | flap endonuclease GI +   | 17935413  | 17966632  |
| NM_182625       | GEN1     | flap endonuclease GI +   | 17935176  | 17966632  |
| NM_001130145    | YAP1     | yorkie homolog isofo +   | 101981191 | 102104154 |
| NM_001195044    | YAP1     | yorkie homolog isofo +   | 101981191 | 102104154 |
| NM_001195045    | YAP1     | yorkie homolog isofo +   | 101983170 | 102104154 |
| NM_006106       | YAP1     | yorkie homolog isofo +   | 101981191 | 102104154 |
| ENST00000357393 | AKNAD1   | AKNA domain conta -      | 109365460 | 109506106 |
| NM_001018054    | LRP8     | low-density lipoprote -  | 53708040  | 53793821  |
| NM_004631       | LRP8     | low-density lipoprote -  | 53708040  | 53793821  |
| NM_017522       | LRP8     | low-density lipoprote -  | 53708040  | 53793821  |
| NM_033300       | LRP8     | low-density lipoprote -  | 53708040  | 53793821  |
| NM_003307       | TRPM2    | transient receptor pot + | 45773483  | 45862964  |
| NM_001098517    | CADM1    | cell adhesion molecu -   | 115044344 | 115375241 |
| NM_014333       | CADM1    | cell adhesion molecu -   | 115044344 | 115375241 |
| NM_001012662    | SLC3A2   | 4F2 cell-surface antiç + | 62623483  | 62656355  |
| NM_001012664    | SLC3A2   | 4F2 cell-surface antiç + | 62623483  | 62656355  |
| NM_002394       | SLC3A2   | 4F2 cell-surface antiç + | 62623483  | 62656355  |
| NM_001243076    | E2F3     | transcription factor E + | 20404033  | 20493945  |
| NM_001949       | E2F3     | transcription factor E + | 20402136  | 20493945  |
| NM_001429       | EP300    | histone acetyltransfer + | 41488613  | 41576081  |
| NM_001198868    | CAPN1    | calpain-1 catalytic su + | 64948685  | 64979477  |
| NM_001198869    | CAPN1    | calpain-1 catalytic su + | 64949149  | 64979477  |
| NM_005186       | CAPN1    | calpain-1 catalytic su + | 64949303  | 64979477  |
| NM_178468       | FAM83C   | protein FAM83C -         | 33873533  | 33880225  |
| ENST00000404479 | AVL9     | AVL9 homolog (S. c +     | 32535321  | 33078516  |



|             |             |           |           |            |            |
|-------------|-------------|-----------|-----------|------------|------------|
| 1258.290517 | 350.881634  | 9.808209  | 8.622199  | 902.78595  | 970.4417   |
| 330.417979  | 43.789126   | 7.655555  | 5.66618   | 357.74792  | 43.912132  |
| 49.481026   | 7.263521    | 5.247294  | 2.963842  | 60.63621   | 35.492496  |
| 49.481026   | 7.263521    | 5.247294  | 2.963842  | 60.63621   | 35.492496  |
| 49.481026   | 7.263521    | 5.247294  | 2.963842  | 60.63621   | 35.492496  |
| 47.743621   | 6.095834    | 5.038082  | 2.694006  | 34.2206    | 29.050005  |
| 708.775418  | 56.897263   | 8.751588  | 5.922318  | 1084.4419  | 522.55945  |
| 374.35764   | 56.056251   | 8.102359  | 6.123398  | 445.3553   | 437.1698   |
| 406.166352  | 94.79348    | 8.247662  | 6.856532  | 375.30408  | 367.826    |
| 354.602248  | 57.272866   | 7.874058  | 5.974134  | 396.28064  | 145.18181  |
| 76.091603   | 19.677933   | 5.844881  | 4.546969  | 100.5249   | 109.69317  |
| 205.288672  | 54.14631    | 7.299135  | 6.036126  | 232.1995   | 162.86865  |
| 35.844443   | 8.08762     | 4.772818  | 3.006187  | 46.15725   | 41.42834   |
| 41.71884    | 10.046014   | 4.719858  | 3.432258  | 38.925785  | 4.9999995  |
| 64.975771   | 19.093219   | 5.51908   | 4.221028  | 44.84784   | 28.770996  |
| 43.358494   | 8.702283    | 5.065357  | 3.31292   | 43.535946  | 52.158936  |
| 162.575323  | 21.574095   | 6.745264  | 4.702845  | 186.63904  | 33.666588  |
| 20.073657   | 5.719877    | 4.004658  | 2.669299  | 18.962297  | 16.58257   |
| 192.482714  | 52.098683   | 6.94904   | 5.944189  | 191.72299  | 115.066605 |
| 247.169627  | 70.700674   | 7.528056  | 6.418529  | 216.25089  | 249.40005  |
| 247.169627  | 70.700674   | 7.528056  | 6.418529  | 216.25089  | 249.40005  |
| 247.169627  | 70.700674   | 7.528056  | 6.418529  | 216.25089  | 249.40005  |
| 247.169627  | 70.700674   | 7.528056  | 6.418529  | 216.25089  | 249.40005  |
| 247.169627  | 70.700674   | 7.528056  | 6.418529  | 216.25089  | 249.40005  |
| 17.338622   | 5.453567    | 3.784844  | 2.548673  | 16.11249   | 21.921864  |
| 159.679227  | 16.828704   | 6.909517  | 4.298551  | 195.48799  | 247.1486   |
| 19.993082   | 7.916174    | 3.989056  | 2.988369  | 22.830044  | 22.426352  |
| 122.925856  | 20.920454   | 6.577731  | 4.309887  | 119.531105 | 103.47118  |
| 122.925856  | 20.920454   | 6.577731  | 4.309887  | 119.531105 | 103.47118  |
| 454.34275   | 120.383147  | 8.398056  | 6.934741  | 428.55023  | 467.79846  |
| 24.40123    | 9.190209    | 4.288721  | 3.191441  | 23.01765   | 19.631588  |
| 301.76687   | 90.770458   | 7.83861   | 6.697561  | 310.96146  | 221.44276  |
| 301.76687   | 90.770458   | 7.83861   | 6.697561  | 310.96146  | 221.44276  |
| 301.76687   | 90.770458   | 7.83861   | 6.697561  | 310.96146  | 221.44276  |
| 301.76687   | 90.770458   | 7.83861   | 6.697561  | 310.96146  | 221.44276  |
| 156.603903  | 38.099136   | 6.893121  | 5.217705  | 214.36281  | 193.70563  |
| 27.35224    | 7.334252    | 4.388043  | 3.101525  | 28.667418  | 33.20759   |
| 76.603512   | 6.420291    | 5.879152  | 2.798759  | 62.458794  | 53.13058   |
| 76.603512   | 6.420291    | 5.879152  | 2.798759  | 62.458794  | 53.13058   |
| 76.603512   | 6.420291    | 5.879152  | 2.798759  | 62.458794  | 53.13058   |
| 76.603512   | 6.420291    | 5.879152  | 2.798759  | 62.458794  | 53.13058   |
| 85.260935   | 16.928947   | 5.74439   | 4.208485  | 86.79832   | 115.11001  |
| 129.865114  | 8.827308    | 6.019572  | 3.332614  | 222.20952  | 237.72578  |
| 89.227174   | 25.82633    | 5.950724  | 4.860736  | 96.40833   | 23.43304   |
| 89.227174   | 25.82633    | 5.950724  | 4.860736  | 96.40833   | 23.43304   |
| 6687.080891 | 194.281128  | 10.655569 | 6.527732  | 5506.806   | 97.909966  |
| 34.628996   | 12.953721   | 4.773327  | 3.563967  | 38.147804  | 37.227848  |
| 187.724819  | 14.987244   | 6.661256  | 4.064847  | 318.8471   | 266.6033   |
| 614.438438  | 183.826024  | 8.829979  | 7.773922  | 553.43036  | 470.39764  |
| 614.438438  | 183.826024  | 8.829979  | 7.773922  | 553.43036  | 470.39764  |
| 614.438438  | 183.826024  | 8.829979  | 7.773922  | 553.43036  | 470.39764  |
| 259.816657  | 5.947452    | 7.16022   | 2.607946  | 223.81558  | 19.97728   |
| 4167.3279   | 1084.853693 | 11.571164 | 10.412025 | 4148.364   | 2941.968   |
| 186.07058   | 48.761351   | 7.173837  | 5.895972  | 193.09958  | 186.06898  |
| 186.07058   | 48.761351   | 7.173837  | 5.895972  | 193.09958  | 186.06898  |
| 6437.76685  | 894.757618  | 12.167091 | 10.148025 | 5794.997   | 4649.5415  |
| 109.617227  | 30.186941   | 6.38005   | 4.60767   | 169.87868  | 108.60919  |
| 122.805441  | 47.742651   | 6.530014  | 5.459487  | 145.89363  | 138.88104  |
| 122.805441  | 47.742651   | 6.530014  | 5.459487  | 145.89363  | 138.88104  |
| 122.805441  | 47.742651   | 6.530014  | 5.459487  | 145.89363  | 138.88104  |
| 156.217421  | 32.855164   | 6.893751  | 5.09824   | 138.41248  | 145.68909  |
| 140.588082  | 32.764154   | 6.735409  | 5.293431  | 152.99806  | 101.996284 |

|            |            |            |            |            |            |
|------------|------------|------------|------------|------------|------------|
| 812.04175  | 2084.6921  | 1005.8459  | 1773.9357  | 412.88608  | 101.920494 |
| 638.45636  | 211.93507  | 359.96564  | 370.49075  | 48.162457  | 57.690266  |
| 78.15306   | 43.1107    | 34.928696  | 44.564995  | 4.9999995  | 4.9999995  |
| 78.15306   | 43.1107    | 34.928696  | 44.564995  | 4.9999995  | 4.9999995  |
| 78.15306   | 43.1107    | 34.928696  | 44.564995  | 4.9999995  | 4.9999995  |
| 36.69402   | 21.16178   | 81.142654  | 84.19267   | 4.9999995  | 4.9999995  |
| 1655.7528  | 374.21704  | 233.3557   | 382.32562  | 80.83682   | 32.83636   |
| 447.37054  | 423.88147  | 166.12016  | 326.24857  | 46.083622  | 47.459045  |
| 311.14447  | 292.99353  | 531.39343  | 558.3366   | 92.39612   | 49.613647  |
| 658.9373   | 475.4046   | 124.4675   | 327.34164  | 55.53942   | 15.878791  |
| 51.398567  | 79.42163   | 50.017498  | 65.49385   | 15.760899  | 11.615182  |
| 277.03638  | 181.44984  | 156.17046  | 222.0072   | 60.7083    | 30.084446  |
| 44.678143  | 21.519999  | 36.30858   | 24.974346  | 12.02261   | 4.9999995  |
| 75.63082   | 38.384315  | 40.67774   | 51.69438   | 12.173339  | 4.9999995  |
| 54.869976  | 43.813538  | 111.50247  | 106.049805 | 9.673052   | 8.489222   |
| 26.844877  | 36.092743  | 52.40568   | 49.112785  | 8.094989   | 5.839463   |
| 298.39624  | 180.18561  | 93.96648   | 182.59798  | 16.258732  | 17.613834  |
| 16.58507   | 28.687967  | 17.371794  | 22.252241  | 4.9999995  | 8.502986   |
| 266.8133   | 337.79172  | 34.640858  | 208.86081  | 55.962532  | 35.04966   |
| 183.01465  | 381.64008  | 153.07909  | 299.633    | 82.59278   | 54.413635  |
| 183.01465  | 381.64008  | 153.07909  | 299.633    | 82.59278   | 54.413635  |
| 183.01465  | 381.64008  | 153.07909  | 299.633    | 82.59278   | 54.413635  |
| 183.01465  | 381.64008  | 153.07909  | 299.633    | 82.59278   | 54.413635  |
| 183.01465  | 381.64008  | 153.07909  | 299.633    | 82.59278   | 54.413635  |
| 183.01465  | 381.64008  | 153.07909  | 299.633    | 82.59278   | 54.413635  |
| 13.031251  | 17.57249   | 16.7905    | 18.603136  | 5.0814486  | 4.9999995  |
| 130.96411  | 136.9563   | 105.29006  | 142.2283   | 18.0105    | 10.291361  |
| 19.690964  | 16.013968  | 16.257744  | 22.739418  | 5.5787673  | 4.9999995  |
| 124.90714  | 106.77701  | 118.678    | 164.1907   | 18.892002  | 6.2510633  |
| 124.90714  | 106.77701  | 118.678    | 164.1907   | 18.892002  | 6.2510633  |
| 298.86902  | 609.46075  | 319.65454  | 601.7235   | 160.59221  | 58.94444   |
| 25.225655  | 30.106     | 19.838037  | 28.588448  | 9.636254   | 4.9999995  |
| 399.8741   | 312.11554  | 219.6119   | 346.59546  | 107.446396 | 47.195328  |
| 399.8741   | 312.11554  | 219.6119   | 346.59546  | 107.446396 | 47.195328  |
| 399.8741   | 312.11554  | 219.6119   | 346.59546  | 107.446396 | 47.195328  |
| 399.8741   | 312.11554  | 219.6119   | 346.59546  | 107.446396 | 47.195328  |
| 154.51347  | 158.2308   | 121.552    | 97.258705  | 39.046047  | 17.040037  |
| 12.9498205 | 38.53525   | 23.400024  | 27.353336  | 6.2016997  | 8.897997   |
| 95.26995   | 60.36033   | 95.58217   | 92.81925   | 4.9999995  | 5.840568   |
| 95.26995   | 60.36033   | 95.58217   | 92.81925   | 4.9999995  | 5.840568   |
| 95.26995   | 60.36033   | 95.58217   | 92.81925   | 4.9999995  | 5.840568   |
| 95.26995   | 60.36033   | 95.58217   | 92.81925   | 4.9999995  | 5.840568   |
| 19.399286  | 34.967403  | 150.14551  | 105.14508  | 16.5102    | 19.282343  |
| 158.29227  | 6.428844   | 86.735886  | 67.798386  | 14.279897  | 8.449969   |
| 152.3604   | 111.407326 | 55.42426   | 96.32969   | 31.6529    | 12.00447   |
| 152.3604   | 111.407326 | 55.42426   | 96.32969   | 31.6529    | 12.00447   |
| 10878.724  | 15729.945  | 112.57008  | 7796.5303  | 25.551489  | 40.21799   |
| 30.924765  | 28.533026  | 29.97818   | 42.962353  | 14.6022    | 4.9999995  |
| 343.96158  | 24.476706  | 101.2995   | 71.16073   | 22.084408  | 26.69239   |
| 578.2668   | 423.74167  | 811.67786  | 849.1163   | 141.61026  | 121.302765 |
| 578.2668   | 423.74167  | 811.67786  | 849.1163   | 141.61026  | 121.302765 |
| 578.2668   | 423.74167  | 811.67786  | 849.1163   | 141.61026  | 121.302765 |
| 420.27893  | 464.10666  | 115.94137  | 314.78012  | 4.9999995  | 4.9999995  |
| 5474.3477  | 3523.571   | 3911.2407  | 5004.476   | 1011.8619  | 571.16     |
| 172.36029  | 146.04967  | 195.31142  | 223.53354  | 49.57457   | 41.57514   |
| 172.36029  | 146.04967  | 195.31142  | 223.53354  | 49.57457   | 41.57514   |
| 6405.129   | 9281.47    | 4174.5356  | 8320.928   | 652.7849   | 603.97626  |
| 115.42466  | 104.71178  | 72.44422   | 86.634834  | 45.778     | 6.2907233  |
| 142.71762  | 61.290276  | 129.06989  | 118.98019  | 47.91928   | 13.100169  |
| 142.71762  | 61.290276  | 129.06989  | 118.98019  | 47.91928   | 13.100169  |
| 142.71762  | 61.290276  | 129.06989  | 118.98019  | 47.91928   | 13.100169  |
| 122.06858  | 230.61938  | 106.196526 | 194.31847  | 36.17399   | 12.815191  |
| 193.78938  | 167.34338  | 82.31619   | 145.0852   | 37.471684  | 19.596743  |

|            |           |           |            |           |           |
|------------|-----------|-----------|------------|-----------|-----------|
| 697.1309   | 301.35797 | 321.01038 | 270.98398  | 9.348302  | 9.581283  |
| 47.413372  | 64.02873  | 19.141453 | 26.29848   | 8.023324  | 5.3405786 |
| 5.5015626  | 9.196589  | 10.051681 | 8.831296   | 5.462109  | 5.063734  |
| 5.5015626  | 9.196589  | 10.051681 | 8.831296   | 5.462109  | 5.063734  |
| 5.5015626  | 9.196589  | 10.051681 | 8.831296   | 5.462109  | 5.063734  |
| 6.7648     | 5.820306  | 8.989898  | 4.9999995  | 4.634572  | 4.798945  |
| 125.27391  | 36.52283  | 35.285805 | 30.627853  | 9.608767  | 8.717515  |
| 44.319454  | 83.58919  | 51.89145  | 62.994743  | 8.326399  | 8.464822  |
| 121.325386 | 97.84458  | 117.92859 | 89.65256   | 8.088139  | 8.2289915 |
| 97.287735  | 51.12119  | 77.70592  | 46.10414   | 8.174321  | 6.9488573 |
| 24.488657  | 20.404188 | 26.652067 | 19.146608  | 6.2015896 | 6.557655  |
| 65.44315   | 48.79788  | 73.25863  | 46.585453  | 7.40632   | 7.10531   |
| 13.659499  | 4.9999995 | 4.9999995 | 7.843615   | 5.0685134 | 5.2625294 |
| 13.40538   | 7.4061832 | 10.514869 | 11.776311  | 4.818704  | 2.3499577 |
| 20.848618  | 7.6221433 | 47.562733 | 20.363548  | 5.0282154 | 4.7870464 |
| 8.687705   | 4.9999995 | 13.769931 | 10.8216095 | 4.986884  | 5.5674644 |
| 19.470383  | 33.61823  | 24.380238 | 18.10315   | 7.0913277 | 4.994234  |
| 5.816277   | 4.9999995 | 4.9999995 | 4.9999995  | 3.7844949 | 4.0625954 |
| 78.002144  | 75.20706  | 28.824451 | 39.54625   | 7.1316414 | 6.623887  |
| 102.23582  | 49.915752 | 83.9548   | 51.091255  | 7.3053923 | 7.696294  |
| 102.23582  | 49.915752 | 83.9548   | 51.091255  | 7.3053923 | 7.696294  |
| 102.23582  | 49.915752 | 83.9548   | 51.091255  | 7.3053923 | 7.696294  |
| 102.23582  | 49.915752 | 83.9548   | 51.091255  | 7.3053923 | 7.696294  |
| 102.23582  | 49.915752 | 83.9548   | 51.091255  | 7.3053923 | 7.696294  |
| 7.440783   | 5.199169  | 4.9999995 | 4.9999995  | 3.5386198 | 4.419765  |
| 27.879553  | 15.786359 | 15.63296  | 13.3714905 | 7.161766  | 7.6849566 |
| 15.399421  | 7.748104  | 4.9999995 | 8.77075    | 4.050323  | 4.4485517 |
| 44.22104   | 6.2074623 | 31.351059 | 18.6001    | 6.4508348 | 6.476785  |
| 44.22104   | 6.2074623 | 31.351059 | 18.6001    | 6.4508348 | 6.476785  |
| 288.28375  | 46.960403 | 106.0444  | 61.47368   | 8.283695  | 8.5612955 |
| 16.20903   | 6.974661  | 12.321311 | 4.9999995  | 4.061588  | 4.276203  |
| 179.19989  | 60.83973  | 84.394714 | 65.54669   | 7.824967  | 7.535128  |
| 179.19989  | 60.83973  | 84.394714 | 65.54669   | 7.824967  | 7.535128  |
| 179.19989  | 60.83973  | 84.394714 | 65.54669   | 7.824967  | 7.535128  |
| 179.19989  | 60.83973  | 84.394714 | 65.54669   | 7.824967  | 7.535128  |
| 89.14887   | 10.26421  | 44.122128 | 28.973524  | 7.2939515 | 7.353887  |
| 7.573715   | 8.379484  | 4.9999995 | 7.952615   | 4.3884783 | 4.976894  |
| 4.9999995  | 12.198889 | 4.9999995 | 5.4822893  | 5.5092583 | 5.5904655 |
| 4.9999995  | 12.198889 | 4.9999995 | 5.4822893  | 5.5092583 | 5.5904655 |
| 4.9999995  | 12.198889 | 4.9999995 | 5.4822893  | 5.5092583 | 5.5904655 |
| 4.9999995  | 12.198889 | 4.9999995 | 5.4822893  | 5.5092583 | 5.5904655 |
| 9.444296   | 5.3062754 | 26.201897 | 24.828669  | 5.9853973 | 6.6245146 |
| 7.2309375  | 9.612844  | 8.390201  | 4.9999995  | 7.345891  | 7.6308746 |
| 44.374344  | 30.058376 | 15.146712 | 21.721178  | 6.1434126 | 4.5086327 |
| 44.374344  | 30.058376 | 15.146712 | 21.721178  | 6.1434126 | 4.5086327 |
| 20.445036  | 730.4443  | 23.152252 | 325.8757   | 11.922487 | 6.3975606 |
| 29.41766   | 8.074859  | 15.520007 | 5.107598   | 4.788298  | 5.124046  |
| 7.7906184  | 8.324977  | 12.9987   | 12.0323715 | 7.863238  | 7.793955  |
| 151.3331   | 140.16599 | 358.46494 | 190.07909  | 8.629734  | 8.568922  |
| 151.3331   | 140.16599 | 358.46494 | 190.07909  | 8.629734  | 8.568922  |
| 151.3331   | 140.16599 | 358.46494 | 190.07909  | 8.629734  | 8.568922  |
| 8.37407    | 7.3106437 | 4.9999995 | 4.9999995  | 7.3555274 | 4.2987247 |
| 1509.4186  | 878.8135  | 1543.6344 | 994.23376  | 11.533211 | 11.095217 |
| 73.47551   | 39.52516  | 51.11404  | 37.303684  | 7.1417656 | 7.2986503 |
| 73.47551   | 39.52516  | 51.11404  | 37.303684  | 7.1417656 | 7.2986503 |
| 737.58655  | 976.9606  | 1438.8883 | 958.3491   | 12.007929 | 11.745006 |
| 86.61897   | 18.674883 | 10.77736  | 12.981709  | 6.9530897 | 6.544403  |
| 98.205086  | 11.676641 | 77.459465 | 38.095264  | 6.733493  | 6.8879776 |
| 98.205086  | 11.676641 | 77.459465 | 38.095264  | 6.733493  | 6.8879776 |
| 98.205086  | 11.676641 | 77.459465 | 38.095264  | 6.733493  | 6.8879776 |
| 76.901474  | 20.922037 | 27.521494 | 22.796799  | 6.658544  | 6.952891  |
| 49.35076   | 30.99529  | 32.855816 | 26.314634  | 6.800972  | 6.456201  |

|           |           |           |           |           |           |
|-----------|-----------|-----------|-----------|-----------|-----------|
| 9.310479  | 10.694319 | 9.713501  | 10.201367 | 8.946791  | 7.5214567 |
| 8.952066  | 7.415809  | 8.235066  | 7.9664865 | 5.824733  | 6.7025757 |
| 5.97195   | 5.018354  | 4.973589  | 4.9940286 | 2.3467326 | 2.4279919 |
| 5.97195   | 5.018354  | 4.973589  | 4.9940286 | 2.3467326 | 2.4279919 |
| 5.97195   | 5.018354  | 4.973589  | 4.9940286 | 2.3467326 | 2.4279919 |
| 4.883236  | 3.895083  | 6.139213  | 5.877446  | 2.3467326 | 2.4279919 |
| 10.326608 | 8.228167  | 7.620659  | 8.0078125 | 6.5615597 | 5.8750777 |
| 8.453865  | 8.419691  | 7.1489687 | 7.8004084 | 5.755705  | 6.415596  |
| 7.9453964 | 7.880502  | 8.79986   | 8.543084  | 6.760474  | 6.4802055 |
| 8.998642  | 8.578119  | 6.738639  | 7.8057694 | 6.0326552 | 4.807745  |
| 5.3671384 | 5.9501505 | 5.469121  | 5.5236344 | 4.209     | 4.327213  |
| 7.777924  | 7.179931  | 7.0678725 | 7.257452  | 6.159248  | 5.7483354 |
| 5.161788  | 3.9250717 | 5.0294785 | 4.1895256 | 3.8186889 | 2.4279919 |
| 5.923726  | 4.8355274 | 5.1878457 | 5.2033877 | 3.8345864 | 2.4279919 |
| 5.4627233 | 5.0429378 | 6.583504  | 6.2100544 | 3.4965007 | 3.8561304 |
| 4.4360514 | 4.7402105 | 5.531058  | 5.1304765 | 3.2195497 | 3.2878168 |
| 7.8861995 | 7.1702876 | 6.3435903 | 6.985943  | 4.2549696 | 4.96185   |
| 3.7347383 | 4.3821063 | 4.0334444 | 4.03057   | 2.3467326 | 3.85964   |
| 7.724357  | 8.082412  | 4.9619446 | 7.170001  | 6.0444593 | 5.973104  |
| 7.193693  | 8.253093  | 7.040218  | 7.6796465 | 6.5937204 | 6.616384  |
| 7.193693  | 8.253093  | 7.040218  | 7.6796465 | 6.5937204 | 6.616384  |
| 7.193693  | 8.253093  | 7.040218  | 7.6796465 | 6.5937204 | 6.616384  |
| 7.193693  | 8.253093  | 7.040218  | 7.6796465 | 6.5937204 | 6.616384  |
| 7.193693  | 8.253093  | 7.040218  | 7.6796465 | 6.5937204 | 6.616384  |
| 3.3767688 | 3.5917988 | 3.9879944 | 3.7941175 | 2.5668135 | 2.4279919 |
| 6.7101984 | 6.770028  | 6.504014  | 6.626141  | 4.4081416 | 4.14771   |
| 3.9788797 | 3.4476595 | 3.9466958 | 4.062228  | 2.6802049 | 2.4279919 |
| 6.6428337 | 6.39021   | 6.669389  | 6.836334  | 4.4747753 | 3.3952608 |
| 6.6428337 | 6.39021   | 6.669389  | 6.836334  | 4.4747753 | 3.3952608 |
| 7.8872366 | 8.935019  | 8.069753  | 8.651334  | 7.5744343 | 6.732023  |
| 4.344529  | 4.4576254 | 4.210272  | 4.3821063 | 3.4907894 | 2.4279919 |
| 8.296036  | 7.964705  | 7.533695  | 7.8771286 | 6.9842486 | 6.410164  |
| 8.296036  | 7.964705  | 7.533695  | 7.8771286 | 6.9842486 | 6.410164  |
| 8.296036  | 7.964705  | 7.533695  | 7.8771286 | 6.9842486 | 6.410164  |
| 8.296036  | 7.964705  | 7.533695  | 7.8771286 | 6.9842486 | 6.410164  |
| 6.937498  | 6.984489  | 6.704623  | 6.08428   | 5.5193677 | 4.908648  |
| 3.3664968 | 4.8418093 | 4.437298  | 4.3172793 | 2.8341522 | 3.927845  |
| 6.251731  | 5.5379395 | 6.367337  | 6.018183  | 2.3467326 | 3.288384  |
| 6.251731  | 5.5379395 | 6.367337  | 6.018183  | 2.3467326 | 3.288384  |
| 6.251731  | 5.5379395 | 6.367337  | 6.018183  | 2.3467326 | 3.288384  |
| 6.251731  | 5.5379395 | 6.367337  | 6.018183  | 2.3467326 | 3.288384  |
| 3.9564953 | 4.6923003 | 7.011234  | 6.1963964 | 4.2766814 | 5.0950284 |
| 6.971765  | 2.3644512 | 6.2304897 | 5.5739594 | 4.06421   | 3.849219  |
| 6.918961  | 6.4565935 | 5.6068864 | 6.069859  | 5.2160473 | 4.3790574 |
| 6.918961  | 6.4565935 | 5.6068864 | 6.069859  | 5.2160473 | 4.3790574 |
| 13.088534 | 13.602689 | 6.5985875 | 12.323554 | 4.920095  | 6.1737413 |
| 4.643329  | 4.3735476 | 4.7663503 | 4.9443884 | 4.0984774 | 2.4279919 |
| 8.088139  | 4.1300054 | 6.448945  | 5.6432543 | 4.7018857 | 5.5715437 |
| 8.813948  | 8.418445  | 9.400775  | 9.148048  | 7.3750467 | 7.7695537 |
| 8.813948  | 8.418445  | 9.400775  | 9.148048  | 7.3750467 | 7.7695537 |
| 8.813948  | 8.418445  | 9.400775  | 9.148048  | 7.3750467 | 7.7695537 |
| 8.37176   | 8.544586  | 6.6398687 | 7.7508507 | 2.3467326 | 2.4279919 |
| 12.063105 | 11.443338 | 11.627442 | 11.664671 | 10.293921 | 10.011373 |
| 7.100487  | 6.8625493 | 7.3732386 | 7.266332  | 5.864369  | 6.222662  |
| 7.100487  | 6.8625493 | 7.3732386 | 7.266332  | 5.864369  | 6.222662  |
| 12.286313 | 12.816938 | 11.730327 | 12.416035 | 9.637304  | 10.098842 |
| 6.531791  | 6.3592005 | 5.974218  | 5.917599  | 5.745844  | 3.4048026 |
| 6.833834  | 5.560849  | 6.7888656 | 6.375064  | 5.8151846 | 4.5102587 |
| 6.833834  | 5.560849  | 6.7888656 | 6.375064  | 5.8151846 | 4.5102587 |
| 6.833834  | 5.560849  | 6.7888656 | 6.375064  | 5.8151846 | 4.5102587 |
| 6.6102934 | 7.5460916 | 6.5149226 | 7.0797615 | 5.412638  | 4.4770713 |
| 7.28121   | 7.058901  | 6.1588383 | 6.656333  | 5.4633427 | 5.118687  |

|           |           |            |           |
|-----------|-----------|------------|-----------|
| 9.390692  | 8.687897  | 8.566363   | 8.619994  |
| 5.56461   | 6.301192  | 4.5241785  | 5.0797906 |
| 2.6848872 | 3.2959056 | 3.6074893  | 3.4200444 |
| 2.6848872 | 3.2959056 | 3.6074893  | 3.4200444 |
| 2.6848872 | 3.2959056 | 3.6074893  | 3.4200444 |
| 2.9299414 | 2.652359  | 3.4542572  | 2.352752  |
| 6.930485  | 5.421158  | 5.416299   | 5.329326  |
| 5.467793  | 6.711897  | 5.967298   | 6.4220996 |
| 6.882299  | 6.949231  | 7.1316414  | 6.9353433 |
| 6.564968  | 5.9489    | 6.5411854  | 5.949353  |
| 4.6382585 | 4.5120177 | 5.0065136  | 4.5888133 |
| 6.0119452 | 5.8748646 | 6.4577093  | 5.964653  |
| 3.8449483 | 2.3408759 | 2.3618152  | 3.2428002 |
| 3.8189805 | 2.9792404 | 3.6762753  | 3.8564725 |
| 4.4221272 | 3.0190907 | 5.8468485  | 4.6854677 |
| 3.2438054 | 2.3408759 | 4.0554543  | 3.7300177 |
| 4.329341  | 5.289346  | 4.8786163  | 4.502949  |
| 2.7539785 | 2.3408759 | 2.3618152  | 2.352752  |
| 6.2505713 | 6.554103  | 5.1265464  | 5.7163506 |
| 6.638735  | 5.911976  | 6.645652   | 6.1047087 |
| 6.638735  | 5.911976  | 6.645652   | 6.1047087 |
| 6.638735  | 5.911976  | 6.645652   | 6.1047087 |
| 6.638735  | 5.911976  | 6.645652   | 6.1047087 |
| 6.638735  | 5.911976  | 6.645652   | 6.1047087 |
| 3.0434377 | 2.5392249 | 2.3618152  | 2.352752  |
| 4.8232274 | 4.122161  | 4.23848    | 4.0515842 |
| 4.0083365 | 3.0431654 | 2.3618152  | 3.4086986 |
| 5.4643283 | 2.7369564 | 5.2451262  | 4.542872  |
| 5.4643283 | 2.7369564 | 5.2451262  | 4.542872  |
| 8.117848  | 5.8115625 | 6.9846425  | 6.3879356 |
| 4.0796003 | 2.8988798 | 3.898635   | 2.352752  |
| 7.4381466 | 6.219662  | 6.654179   | 6.4789686 |
| 7.4381466 | 6.219662  | 6.654179   | 6.4789686 |
| 7.4381466 | 6.219662  | 6.654179   | 6.4789686 |
| 7.4381466 | 6.219662  | 6.654179   | 6.4789686 |
| 6.446036  | 3.4629354 | 5.732198   | 5.2370453 |
| 3.0642402 | 3.156166  | 2.3618152  | 3.2649329 |
| 2.350709  | 3.7244644 | 2.3618152  | 2.7204459 |
| 2.350709  | 3.7244644 | 2.3618152  | 2.7204459 |
| 2.350709  | 3.7244644 | 2.3618152  | 2.7204459 |
| 2.350709  | 3.7244644 | 2.3618152  | 2.7204459 |
| 3.3542109 | 2.5540571 | 4.9811063  | 4.989828  |
| 3.0081766 | 3.3601177 | 3.3612103  | 2.352752  |
| 5.469121  | 5.1198263 | 4.1960816  | 4.78428   |
| 5.469121  | 5.1198263 | 4.1960816  | 4.78428   |
| 4.395179  | 9.980859  | 4.8072286  | 8.889292  |
| 4.8980455 | 3.1027772 | 4.227571   | 2.6289368 |
| 3.1011732 | 3.147706  | 3.9763172  | 3.890456  |
| 7.1901817 | 7.50123   | 8.7229805  | 8.084542  |
| 7.1901817 | 7.50123   | 8.7229805  | 8.084542  |
| 7.1901817 | 7.50123   | 8.7229805  | 8.084542  |
| 3.1954978 | 2.9628856 | 2.3618152  | 2.352752  |
| 10.499889 | 10.258546 | 10.843684  | 10.564739 |
| 6.173225  | 5.5413747 | 5.9462333  | 5.6279664 |
| 6.173225  | 5.5413747 | 5.9462333  | 5.6279664 |
| 9.4709425 | 10.428811 | 10.7457485 | 10.506499 |
| 6.406916  | 4.3750353 | 3.7074575  | 4.0059657 |
| 6.5785966 | 3.6567564 | 6.537415   | 5.6587105 |
| 6.5785966 | 3.6567564 | 6.537415   | 5.6587105 |
| 6.5785966 | 3.6567564 | 6.537415   | 5.6587105 |
| 6.2327456 | 4.553449  | 5.0561547  | 4.857379  |
| 5.624324  | 5.1650705 | 5.307986   | 5.0811777 |

|               |             |             |            |    |           |
|---------------|-------------|-------------|------------|----|-----------|
| ASHGA5P036142 | 0.000786412 | 0.018693364 | 2.5048049  | up | noncoding |
| ASHGA5P036142 | 0.000786412 | 0.018693364 | 2.5048049  | up | noncoding |
| ASHGA5P032620 | 0.016584614 | 0.078580714 | 2.1473727  | up | noncoding |
| ASHGA5P056404 | 0.002804693 | 0.034179323 | 2.0866832  | up | noncoding |
| ASHGA5P030604 | 0.012811735 | 0.069277826 | 2.2713409  | up | noncoding |
| ASHGA5P044146 | 0.014196993 | 0.07311388  | 2.335728   | up | noncoding |
| ASHGA5P032923 | 0.001963999 | 0.029367232 | 2.1390394  | up | noncoding |
| ASHGA5P029346 | 0.026262692 | 0.101017984 | 7.6021628  | up | noncoding |
| ASHGA5P037313 | 0.036963475 | 0.122052801 | 2.9333153  | up | noncoding |
| ASHGA5P031757 | 0.001774506 | 0.028194527 | 6.7935347  | up | noncoding |
| ASHGA5P036109 | 0.001030376 | 0.02180291  | 2.8007194  | up | noncoding |
| ASHGA5P043646 | 0.005388813 | 0.046686888 | 3.012069   | up | noncoding |
| ASHGA5P043646 | 0.005388813 | 0.046686888 | 3.012069   | up | noncoding |
| ASHGA5P040298 | 0.003969963 | 0.040458123 | 2.6552881  | up | noncoding |
| ASHGA5P035267 | 0.007597837 | 0.05476971  | 2.6365736  | up | noncoding |
| ASHGA5P035267 | 0.007597837 | 0.05476971  | 2.6365736  | up | noncoding |
| ASHGA5P035267 | 0.007597837 | 0.05476971  | 2.6365736  | up | noncoding |
| ASHGA5P026978 | 0.003467272 | 0.037964495 | 3.1932996  | up | noncoding |
| ASHGA5P033505 | 0.001516222 | 0.026061852 | 4.4064652  | up | noncoding |
| ASHGA5P018793 | 0.046099546 | 0.138314619 | 2.1886253  | up | noncoding |
| ASHGA5P053143 | 0.006304386 | 0.050660451 | 2.5009764  | up | noncoding |
| ASHGA5P053143 | 0.006304386 | 0.050660451 | 2.5009764  | up | noncoding |
| ASHGA5P021149 | 0.005874032 | 0.048858059 | 4.4627149  | up | noncoding |
| ASHGA5P019670 | 0.000157143 | 0.011056858 | 2.7525392  | up | noncoding |
| ASHGA5P025704 | 0.000557999 | 0.016097331 | 3.8259934  | up | noncoding |
| ASHGA5P023578 | 0.000458137 | 0.015075849 | 2.3702058  | up | noncoding |
| ASHGA5P028042 | 0.019863847 | 0.086084959 | 3.3599994  | up | noncoding |
| ASHGA5P056540 | 0.035522737 | 0.119277847 | 2.0404766  | up | noncoding |
| ASHGA5P040794 | 0.000507233 | 0.015567285 | 2.0495668  | up | noncoding |
| ASHGA5P043693 | 0.000165905 | 0.011182026 | 3.4625892  | up | noncoding |
| ASHGA5P043362 | 0.006163889 | 0.050136632 | 2.4841032  | up | noncoding |
| ASHGA5P023330 | 0.000111756 | 0.009604611 | 2.4379832  | up | noncoding |
| ASHGA5P029329 | 0.006616549 | 0.051709907 | 2.1881848  | up | noncoding |
| ASHGA5P029329 | 0.006616549 | 0.051709907 | 2.1881848  | up | noncoding |
| ASHGA5P029329 | 0.006616549 | 0.051709907 | 2.1881848  | up | noncoding |
| ASHGA5P044814 | 0.001122395 | 0.022616453 | 6.1266661  | up | noncoding |
| ASHGA5P053398 | 0.001926607 | 0.029259988 | 3.1829509  | up | noncoding |
| ASHGA5P047196 | 0.00890742  | 0.058871793 | 2.0982918  | up | noncoding |
| ASHGA5P047196 | 0.00890742  | 0.058871793 | 2.0982918  | up | noncoding |
| ASHGA5P018545 | 0.006904616 | 0.052741391 | 2.5618194  | up | noncoding |
| ASHGA5P031462 | 0.001562147 | 0.026561102 | 3.4046659  | up | noncoding |
| ASHGA5P031462 | 0.001562147 | 0.026561102 | 3.4046659  | up | noncoding |
| ASHGA5P040967 | 0.000189334 | 0.01146874  | 2.693979   | up | noncoding |
| ASHGA5P019108 | 0.005808126 | 0.048450721 | 2.7847072  | up | noncoding |
| ASHGA5P020260 | 0.002332754 | 0.031698104 | 2.1157001  | up | noncoding |
| ASHGA5P046527 | 0.023234983 | 0.09438496  | 2.2865541  | up | noncoding |
| ASHGA5P037005 | 0.003423315 | 0.037690616 | 3.0008076  | up | noncoding |
| ASHGA5P037005 | 0.003423315 | 0.037690616 | 3.0008076  | up | noncoding |
| ASHGA5P037005 | 0.003423315 | 0.037690616 | 3.0008076  | up | noncoding |
| ASHGA5P027695 | 0.011506333 | 0.066101265 | 5.3609735  | up | noncoding |
| ASHGA5P020787 | 0.035734463 | 0.119707935 | 2.1740432  | up | noncoding |
| ASHGA5P027536 | 0.000534127 | 0.015930561 | 3.3814083  | up | noncoding |
| ASHGA5P021701 | 0.00059207  | 0.016411961 | 3.2487973  | up | noncoding |
| ASHGA5P040749 | 0.000510138 | 0.015567285 | 2.221559   | up | noncoding |
| ASHGA5P029721 | 0.027172251 | 0.102915644 | 2.0544306  | up | noncoding |
| ASHGA5P031092 | 0.002033718 | 0.029655965 | 2.2325178  | up | noncoding |
| ASHGA5P031092 | 0.002033718 | 0.029655965 | 2.2325178  | up | noncoding |
| ASHGA5P050981 | 0.002923617 | 0.034973658 | 2.4816182  | up | noncoding |
| ASHGA5P028925 | 0.007332916 | 0.053840332 | 72.9688452 | up | noncoding |
| ASHGA5P044953 | 0.01784005  | 0.081069421 | 2.6314169  | up | noncoding |
| ASHGA5P027994 | 0.025876485 | 0.100335141 | 2.2658034  | up | noncoding |
| ASHGA5P027994 | 0.025876485 | 0.100335141 | 2.2658034  | up | noncoding |

|                 |                |                     |      |       |   |
|-----------------|----------------|---------------------|------|-------|---|
| NR_033903       | CCDC74B-AS1    | RefSeq              | 1835 | chr2  | + |
| NR_033903       | CCDC74B-AS1    | RefSeq              | 1835 | chr2  | + |
| TCONS_00016645  | XLOC_007451    | LincRNAs identified | 469  | chr9  | + |
| TCONS_00003955  | XLOC_001773    | LincRNAs identified | 444  | chr2  | + |
| uc002aqh.1      | BX538221       | UCSC_knowngene      | 4347 | chr15 | + |
| ENST00000520920 | RP11-1080G15.1 | GENCODE             | 561  | chr8  | - |
| ENST00000420951 | AC025627.7     | GENCODE             | 500  | chr17 | + |
| ENST00000555860 | LINC00524      | GENCODE             | 281  | chr14 | - |
| ENST00000415824 | AF064858.6     | GENCODE             | 407  | chr21 | - |
| ENST00000563424 | RP11-401P9.4   | GENCODE             | 3441 | chr16 | + |
| ENST00000445332 | AC009404.2     | GENCODE             | 424  | chr2  | + |
| uc010kyk.2      | BC008049       | UCSC_knowngene      | 1942 | chr7  | + |
| uc010kyk.2      | BC008049       | UCSC_knowngene      | 1942 | chr7  | + |
| uc003jcv.3      | LOC728613      | UCSC_knowngene      | 1205 | chr5  | - |
| ENST00000454260 | STEAP3-AS1     | GENCODE             | 3218 | chr2  | - |
| ENST00000454260 | STEAP3-AS1     | GENCODE             | 3218 | chr2  | - |
| ENST00000454260 | STEAP3-AS1     | GENCODE             | 3218 | chr2  | - |
| uc001qls.1      | BC047090       | UCSC_knowngene      | 699  | chr12 | - |
| ENST00000580197 | RP11-146G7.3   | GENCODE             | 2343 | chr18 | - |
| ENST00000457694 | AC098820.2     | GENCODE             | 666  | chr2  | - |
| NR_029411       | LOC100133091   | RefSeq              | 2712 | chr7  | + |
| NR_029411       | LOC100133091   | RefSeq              | 2712 | chr7  | + |
| ENST00000531402 | CTC-497E21.4   | GENCODE             | 590  | chr11 | - |
| uc001vmo.4      | BC035106       | UCSC_knowngene      | 2905 | chr13 | - |
| NR_027241       | LOC388796      | RefSeq              | 1186 | chr20 | - |
| ENST00000585030 | SNHG15         | GENCODE             | 953  | chr7  | - |
| ENST00000547177 | RP11-968A15.2  | GENCODE             | 735  | chr12 | + |
| TCONS_00005994  | XLOC_002619    | LincRNAs identified | 414  | chr3  | + |
| ENST00000419105 | RP11-277L2.2   | GENCODE             | 777  | chr1  | + |
| uc003tsz.3      | AK123141       | UCSC_knowngene      | 3644 | chr7  | + |
| NR_024454       | NDUFB2-AS1     | RefSeq              | 1648 | chr7  | - |
| ENST00000578497 | RP11-146G7.3   | GENCODE             | 545  | chr18 | - |
| ENST00000569214 | RP11-872J21.3  | GENCODE             | 1512 | chr14 | - |
| ENST00000569214 | RP11-872J21.3  | GENCODE             | 1512 | chr14 | - |
| ENST00000569214 | RP11-872J21.3  | GENCODE             | 1512 | chr14 | - |
| ENST00000521188 | RP11-546K22.1  | GENCODE             | 672  | chr8  | + |
| ENST00000436285 | GAS5           | GENCODE             | 772  | chr1  | - |
| NR_027709       | IDI2-AS1       | RefSeq              | 1324 | chr10 | + |
| NR_027709       | IDI2-AS1       | RefSeq              | 1324 | chr10 | + |
| ENST00000454833 | TMEM191A       | GENCODE             | 419  | chr22 | + |
| ENST00000568795 | RP11-304L19.4  | GENCODE             | 456  | chr16 | + |
| ENST00000568795 | RP11-304L19.4  | GENCODE             | 456  | chr16 | + |
| TCONS_00022268  | XLOC_010588    | LincRNAs identified | 442  | chr13 | - |
| ENST00000468527 | KRT8P12        | GENCODE             | 998  | chr3  | + |
| ENST00000510565 | FAM86EP        | GENCODE             | 741  | chr4  | - |
| ENST00000421132 | RP11-351M16.3  | GENCODE             | 273  | chr10 | - |
| ENST00000421894 | HM13-IT1       | GENCODE             | 356  | chr20 | + |
| ENST00000421894 | HM13-IT1       | GENCODE             | 356  | chr20 | + |
| ENST00000421894 | HM13-IT1       | GENCODE             | 356  | chr20 | + |
| ENST00000561864 | RP11-474D1.4   | GENCODE             | 577  | chr12 | - |
| ENST00000519819 | CTD-3046C4.1   | GENCODE             | 432  | chr8  | - |
| ENST00000550029 | RP11-341G23.4  | GENCODE             | 738  | chr12 | - |
| uc010zaz.1      | LOC150776      | UCSC_knowngene      | 1304 | chr2  | + |
| uc010pbe.1      | BC062745       | UCSC_knowngene      | 1072 | chr1  | + |
| ENST00000478994 | SERPINA13      | pseudogene          | 924  | chr14 | + |
| ENST00000563777 | FBXL19-AS1     | GENCODE             | 3951 | chr16 | - |
| ENST00000563777 | FBXL19-AS1     | GENCODE             | 3951 | chr16 | - |
| ENST00000423536 | RP4-564F22.2   | GENCODE             | 517  | chr20 | - |
| NR_034119       | LINC00460      | RefSeq              | 935  | chr13 | + |
| ENST00000499653 | KB-431C1.4     | GENCODE             | 2048 | chr8  | + |
| NR_047672       | SLC4A8         | RefSeq              | 520  | chr12 | + |
| NR_047672       | SLC4A8         | RefSeq              | 520  | chr12 | + |

|           |           |                      |                             |                       |
|-----------|-----------|----------------------|-----------------------------|-----------------------|
| 130887195 | 130896986 |                      | GATACCTGCTTC/285103         | natural antisense     |
| 130887195 | 130896986 |                      | GATACCTGCTTC/285103         | natural antisense     |
| 92763073  | 92767272  |                      | AAAGATCAAACATCGTCCCAAATCT   | intergenic            |
| 181556788 | 181589386 |                      | AGTCCTCAGGTGCCATCAATATTCT   | intergenic            |
| 67152640  | 67156987  |                      | AGGCAGACATGAGTCAACATATAAC   | intergenic            |
| 18942501  | 19116979  |                      | GAATTACCAGGAAGATTTTGTGT     | intergenic            |
| 19483255  | 19499371  |                      | TCTTGCAGCAGTTGATGATCTTTATA/ | intergenic            |
| 101872329 | 101903211 | ENST00000556987      | GGACAATGTCTGAATTAATGCCGT    | intergenic            |
| 40252230  | 40328392  |                      | AAGAGAGCTTCCTAATGAGGCATCC   | intergenic            |
| 50679719  | 50683160  |                      | TTTAAAGATGGTGGCAGTGAAACTG   | intergenic            |
| 118595319 | 118596965 | ENST00000420330      | CTAACACAGAAGCCATAGTGGACTT   | intergenic            |
| 44808453  | 44810735  |                      | TTTCTTGTGAATGTGCCAAGTATTAC  | exon sense-overlappi  |
| 44808453  | 44810735  |                      | TTTCTTGTGAATGTGCCAAGTATTAC  | exon sense-overlappi  |
| 1628800   | 1634120   | uc003jct.3, uc003jcu | GAAAAAGACTGT 728613         | intergenic            |
| 120001997 | 120006647 |                      | ATTTTGCATCTTGGAGCAGTTCTTCI  | natural antisense     |
| 120001997 | 120006647 |                      | ATTTTGCATCTTGGAGCAGTTCTTCI  | natural antisense     |
| 120001997 | 120006647 |                      | ATTTTGCATCTTGGAGCAGTTCTTCI  | natural antisense     |
| 3445188   | 3445980   |                      | GGCAAGAGTTTTTGAAGAGTCTTGG   | intergenic            |
| 6925476   | 6928571   |                      | TCACAGGAGACATTTTTGATGTCCC   | intergenic            |
| 217250010 | 217277419 |                      | AAGAACCAGCTCTATGAGGTTTGA    | natural antisense     |
| 76178657  | 76257299  |                      | TTTTAGACGGTT/100133091      | natural antisense     |
| 76178657  | 76257299  |                      | TTTTAGACGGTT/100133091      | natural antisense     |
| 13002175  | 13011093  | ENST00000526388      | ATGGGTGTAGGGAGAAAGTTTAAGC   | intergenic            |
| 96325091  | 96329179  |                      | GTAATGTGAAGAATAAAGGAGTCAC   | bidirectional         |
| 37049238  | 37064018  |                      | CGTGGGTAAAGT/388796         | intergenic            |
| 45022624  | 45026268  | ENST00000580458,     | TCAGAAGTGATT/285958         | intergenic            |
| 54656398  | 54672847  |                      | ACTGGGCACATGGATTACATAAAAAC  | intronic antisense    |
| 39418963  | 39422626  |                      | AAGATTGCTAAAGCTGTCCCTGCCA   | intergenic            |
| 149591178 | 149592306 |                      | CTTATGAATACTGAATAGTGAACAT   | intergenic            |
| 63813368  | 63817012  |                      | AGAATTAATATTACCAACTTGTCC/   | intergenic            |
| 140395135 | 140396877 |                      | GTCAGCCACTTT/100134713      | natural antisense     |
| 6927304   | 6929961   |                      | TGGAGCAGTGGAGGTGTTAACCACC   | intergenic            |
| 96967146  | 96968658  |                      | CTTTTTTCACAGAATGTCTAGTAGG/  | bidirectional         |
| 96967146  | 96968658  |                      | CTTTTTTCACAGAATGTCTAGTAGG/  | bidirectional         |
| 96967146  | 96968658  |                      | CTTTTTTCACAGAATGTCTAGTAGG/  | bidirectional         |
| 52874017  | 52935534  |                      | GGAGGAACTGACACACTTTTCTTA    | intergenic            |
| 173833038 | 173836181 | ENST00000412059,     | GTAGGGCAAATT/60674          | intergenic            |
| 1068576   | 1090141   | ENST00000434470      | TTGGAGTCTGTG/55853          | natural antisense     |
| 1068576   | 1090141   | ENST00000434470      | TTGGAGTCTGTG/55853          | natural antisense     |
| 21057262  | 21058407  | ENST00000414022,     | GACGCTGCAGGA/84222          | intergenic            |
| 2162335   | 2163343   |                      | AGACCACGTTCTGGAAGGTCAGGGA   | natural antisense     |
| 2162335   | 2163343   |                      | AGACCACGTTCTGGAAGGTCAGGGA   | natural antisense     |
| 44977061  | 44978565  |                      | AGCCTATTTGTGCCTTGTACCAGA/   | intergenic            |
| 160283234 | 160285987 |                      | GACAGGAAAGTAAGCTCTCTGAAGT   | natural antisense     |
| 3944637   | 3957135   |                      | TCACTCACAGGCCAGGCCAGGATCA   | intergenic            |
| 28721936  | 28784742  |                      | TGGTTGCTGCAAGCGTGTGATACCC   | intergenic            |
| 30150968  | 30151879  |                      | TCCAACACACAGGTAGTCCCAGTGC   | intron sense-overlapp |
| 30150968  | 30151879  |                      | TCCAACACACAGGTAGTCCCAGTGC   | intron sense-overlapp |
| 30150968  | 30151879  |                      | TCCAACACACAGGTAGTCCCAGTGC   | intron sense-overlapp |
| 130509037 | 130529501 |                      | CTGGCTCCGAGTGTCCGTATCGCGT/  | intergenic            |
| 64298166  | 64374108  |                      | CTTCCTTTTGTCTATCCCCATTTCC   | intergenic            |
| 104157089 | 104162636 |                      | GCCTCTGGGAGCTTTTCTTTTTTAA   | natural antisense     |
| 132250385 | 132273977 |                      | CACTGGGTAGTG/150776         | bidirectional         |
| 149230715 | 149232553 |                      | TTGTAAGAATGGCATAAAGCCGGTT   | intergenic            |
| 95107654  | 95111363  | ENST00000469935      | GAACTCGATTTCC/388007        |                       |
| 30930639  | 30934590  |                      | TCCAGCTTCTCT/283932         | natural antisense     |
| 30930639  | 30934590  |                      | TCCAGCTTCTCT/283932         | natural antisense     |
| 37049234  | 37059709  | ENST00000417578,     | TTGAATTTGTAGCTGTCGTTCACTI   | intergenic            |
| 107028910 | 107030142 |                      | CGCCTCTGAAAT/728192         | intergenic            |
| 103255836 | 103265561 |                      | CTTCCAGTTCTTTAAGTCAAATTTI   | natural antisense     |
| 51818593  | 51834963  |                      | GTAATCAGTTTCA/9498          | exon sense-overlappi  |
| 51818593  | 51834963  |                      | GTAATCAGTTTCA/9498          | exon sense-overlappi  |



|                 |          |                         |           |           |
|-----------------|----------|-------------------------|-----------|-----------|
| NM_001258307    | CCDC74B  | coiled-coil domain-c-   | 130896855 | 130902707 |
| NM_207310       | CCDC74B  | coiled-coil domain-c-   | 130896855 | 130902707 |
| NM_031449       | ZMIZ2    | zinc finger MIZ dom +   | 44788529  | 44809479  |
| NM_174929       | ZMIZ2    | zinc finger MIZ dom +   | 44795786  | 44809479  |
| NM_001008410    | STEAP3   | metalloreductase STI +  | 119981383 | 120023227 |
| NM_018234       | STEAP3   | metalloreductase STI +  | 119981383 | 120023227 |
| NM_182915       | STEAP3   | metalloreductase STI +  | 119981383 | 120023227 |
| NM_014140       | SMARCAL1 | SWI/SNF-related ma +    | 217277136 | 217347774 |
| NM_012230       | POMZP3   | POM121 and ZP3 fu -     | 76239302  | 76256620  |
| NM_152992       | POMZP3   | POM121 and ZP3 fu -     | 76239302  | 76256620  |
| NM_006260       | DNAJC3   | dnaJ homolog subfan +   | 96329392  | 96447243  |
| NM_012117       | CBX5     | chromobox protein h -   | 54624730  | 54673915  |
| NM_004546       | NDUFB2   | NADH dehydrogena +      | 140396480 | 140406446 |
| NM_001252006    | PAPOLA   | poly(A) polymerase : +  | 96968712  | 97001935  |
| NM_001252007    | PAPOLA   | poly(A) polymerase : +  | 96968712  | 97001935  |
| NM_032632       | PAPOLA   | poly(A) polymerase : +  | 96968712  | 97033453  |
| NM_004508       | IDI1     | isopentenyl-diphosph -  | 1085963   | 1095061   |
| NM_033261       | IDI2     | isopentenyl-diphosph -  | 1064846   | 1071799   |
| NM_000296       | PKD1     | polycystin-1 isoform -  | 2138710   | 2185899   |
| NM_001009944    | PKD1     | polycystin-1 isoform -  | 2138710   | 2185899   |
| NM_002268       | KPNA4    | importin subunit alph - | 160212782 | 160283376 |
| NM_030789       | HM13     | minor histocompatibi +  | 30102240  | 30157370  |
| NM_178580       | HM13     | minor histocompatibi +  | 30102240  | 30157370  |
| NM_178581       | HM13     | minor histocompatibi +  | 30102240  | 30157370  |
| NM_017564       | STAB2    | stabilin-2 precursor +  | 103981068 | 104160502 |
| NM_001085365    | MZT2A    | mitotic-spindle organ - | 132241532 | 132250064 |
| ENST00000471231 | FBXL19   | F-box and leucine-ric + | 30934391  | 30960097  |
| ENST00000562798 | FBXL19   | F-box and leucine-ric + | 30934375  | 30937252  |
| NM_015902       | UBR5     | E3 ubiquitin-protein -  | 103264501 | 103424917 |
| NM_001039960    | SLC4A8   | electroneutral sodiun + | 51818593  | 51909547  |
| NM_001258401    | SLC4A8   | electroneutral sodiun + | 51785100  | 51909547  |

|             |             |           |           |           |           |
|-------------|-------------|-----------|-----------|-----------|-----------|
| 57.989404   | 14.863491   | 5.508481  | 4.183782  | 65.820946 | 54.05838  |
| 57.989404   | 14.863491   | 5.508481  | 4.183782  | 65.820946 | 54.05838  |
| 314.285922  | 95.589945   | 7.904729  | 6.802156  | 351.23972 | 422.22678 |
| 50.590083   | 16.32663    | 5.306559  | 4.245348  | 51.500088 | 40.24259  |
| 70.8302     | 22.376488   | 5.760941  | 4.577397  | 94.020134 | 95.678635 |
| 31.368197   | 9.247581    | 4.598277  | 3.374405  | 46.193035 | 28.39325  |
| 52.691784   | 16.664524   | 5.358005  | 4.261042  | 65.72899  | 61.366188 |
| 599.282789  | 27.092385   | 7.373833  | 4.447423  | 57.71704  | 17.728333 |
| 50.5066     | 7.659808    | 4.50353   | 2.950998  | 90.191605 | 15.236608 |
| 3285.366483 | 245.742572  | 11.048088 | 8.283926  | 3254.004  | 997.7515  |
| 169.794437  | 40.74752    | 6.990928  | 5.50513   | 133.02089 | 146.54112 |
| 2795.121717 | 555.386225  | 10.990049 | 9.399294  | 3038.9153 | 2319.8462 |
| 2795.121717 | 555.386225  | 10.990049 | 9.399294  | 3038.9153 | 2319.8462 |
| 10384.67718 | 1899.417717 | 12.660806 | 11.251937 | 6271.88   | 6743.0244 |
| 243.093103  | 61.26616    | 7.527753  | 6.129089  | 207.6955  | 327.29187 |
| 243.093103  | 61.26616    | 7.527753  | 6.129089  | 207.6955  | 327.29187 |
| 243.093103  | 61.26616    | 7.527753  | 6.129089  | 207.6955  | 327.29187 |
| 62.928832   | 9.6118      | 4.877254  | 3.202206  | 13.491349 | 7.790182  |
| 226.776595  | 46.023772   | 7.109833  | 4.970211  | 199.8087  | 60.81705  |
| 29.657929   | 11.863385   | 4.563226  | 3.433201  | 35.820972 | 29.354277 |
| 103.757485  | 26.842168   | 6.306319  | 4.983827  | 105.18971 | 134.63791 |
| 103.757485  | 26.842168   | 6.306319  | 4.983827  | 105.18971 | 134.63791 |
| 51.230203   | 8.865263    | 5.234014  | 3.076093  | 29.49046  | 37.970978 |
| 523.18953   | 116.237167  | 8.551911  | 7.091148  | 607.759   | 260.12372 |
| 1386.573383 | 214.211422  | 10.000242 | 8.064407  | 1620.9452 | 1926.9719 |
| 118.857297  | 30.824582   | 6.509982  | 5.264969  | 142.45149 | 159.43773 |
| 81.304772   | 18.554808   | 5.868549  | 4.120088  | 59.089115 | 71.07308  |
| 447.043967  | 119.278872  | 8.184731  | 7.155825  | 426.1879  | 891.98444 |
| 194.932087  | 63.213047   | 7.167366  | 6.132047  | 255.75516 | 160.75471 |
| 3092.8916   | 519.248198  | 11.134102 | 9.342251  | 2997.899  | 2237.0967 |
| 765.133808  | 162.52787   | 8.981063  | 7.668338  | 514.1136  | 613.4526  |
| 62.970882   | 16.672326   | 5.552534  | 4.266846  | 82.35568  | 69.83546  |
| 150.012257  | 45.008084   | 6.809537  | 5.679802  | 192.18347 | 136.9185  |
| 150.012257  | 45.008084   | 6.809537  | 5.679802  | 192.18347 | 136.9185  |
| 150.012257  | 45.008084   | 6.809537  | 5.679802  | 192.18347 | 136.9185  |
| 265.285568  | 26.456335   | 7.552392  | 4.93729   | 180.08743 | 203.736   |
| 12422.196   | 2244.188517 | 13.142706 | 11.472341 | 12344.187 | 9786.553  |
| 42.012726   | 13.64383    | 5.041304  | 3.972089  | 57.50682  | 46.121777 |
| 42.012726   | 13.64383    | 5.041304  | 3.972089  | 57.50682  | 46.121777 |
| 107.751445  | 29.293506   | 6.385327  | 5.028158  | 100.11551 | 93.175865 |
| 57.001915   | 11.525421   | 5.417134  | 3.649621  | 81.37161  | 82.50495  |
| 57.001915   | 11.525421   | 5.417134  | 3.649621  | 81.37161  | 82.50495  |
| 135.401585  | 35.01134    | 6.707662  | 5.277923  | 131.37228 | 106.54268 |
| 407.018333  | 86.622194   | 8.223281  | 6.745756  | 336.0516  | 310.8482  |
| 309.561708  | 90.567832   | 7.828542  | 6.747407  | 315.38162 | 413.323   |
| 67.135822   | 16.407833   | 5.507917  | 4.314742  | 93.35407  | 34.773445 |
| 233.522828  | 45.989497   | 7.41185   | 5.826499  | 273.19788 | 185.29216 |
| 233.522828  | 45.989497   | 7.41185   | 5.826499  | 273.19788 | 185.29216 |
| 233.522828  | 45.989497   | 7.41185   | 5.826499  | 273.19788 | 185.29216 |
| 243.389337  | 33.499198   | 7.14771   | 4.725215  | 334.23364 | 588.7352  |
| 32.477501   | 10.205469   | 4.62564   | 3.505259  | 40.865456 | 26.72454  |
| 908.646035  | 149.187834  | 9.280838  | 7.523214  | 769.27094 | 842.2036  |
| 88.229619   | 18.160414   | 6.043353  | 4.343447  | 100.0344  | 138.29729 |
| 192.486782  | 52.285504   | 7.123407  | 5.971834  | 200.41812 | 103.91041 |
| 20.183392   | 7.314897    | 3.994987  | 2.956249  | 19.401121 | 16.933039 |
| 1513.800367 | 386.947105  | 10.096119 | 8.937448  | 1391.9089 | 1880.6642 |
| 1513.800367 | 386.947105  | 10.096119 | 8.937448  | 1391.9089 | 1880.6642 |
| 45523.52283 | 10551.7165  | 15.016679 | 13.705397 | 49813.395 | 63730.812 |
| 2356.882562 | 6.245971    | 8.788776  | 2.599568  | 482.55923 | 40.08796  |
| 3436.054    | 659.671308  | 11.12452  | 9.72868   | 3177.5508 | 1244.902  |
| 107.86383   | 35.50309    | 6.14855   | 4.968527  | 128.64229 | 24.02607  |
| 107.86383   | 35.50309    | 6.14855   | 4.968527  | 128.64229 | 24.02607  |

|            |            |           |           |            |           |
|------------|------------|-----------|-----------|------------|-----------|
| 76.619225  | 49.953346  | 47.51627  | 53.96826  | 15.894078  | 18.36288  |
| 76.619225  | 49.953346  | 47.51627  | 53.96826  | 15.894078  | 18.36288  |
| 272.69772  | 252.62373  | 322.1076  | 264.81998 | 90.895134  | 50.999237 |
| 53.31915   | 39.77209   | 55.488117 | 63.218464 | 15.998241  | 7.7077003 |
| 59.84246   | 51.724068  | 62.326626 | 61.389275 | 26.459085  | 8.788421  |
| 37.79662   | 35.8843    | 18.201399 | 21.74058  | 4.9999995  | 10.020928 |
| 49.01145   | 37.75328   | 51.88299  | 50.407806 | 14.973848  | 10.02388  |
| 80.51826   | 436.8578   | 1577.9852 | 1424.8901 | 8.965571   | 13.071131 |
| 157.9795   | 16.868298  | 13.409859 | 9.35373   | 8.343867   | 4.9999995 |
| 5445.366   | 5072.2954  | 1607.6958 | 3335.0862 | 224.76967  | 183.21564 |
| 100.37258  | 231.29358  | 155.10527 | 252.43318 | 24.043777  | 26.358307 |
| 3751.3638  | 1634.736   | 2860.281  | 3165.588  | 381.81293  | 257.2237  |
| 3751.3638  | 1634.736   | 2860.281  | 3165.588  | 381.81293  | 257.2237  |
| 5472.7627  | 22687.594  | 5025.836  | 16106.966 | 1729.7086  | 1010.8731 |
| 157.66658  | 232.99364  | 261.2051  | 271.70593 | 66.09404   | 26.344954 |
| 157.66658  | 232.99364  | 261.2051  | 271.70593 | 66.09404   | 26.344954 |
| 157.66658  | 232.99364  | 261.2051  | 271.70593 | 66.09404   | 26.344954 |
| 19.083008  | 165.11258  | 53.10786  | 118.98801 | 4.9999995  | 4.9999995 |
| 382.73856  | 61.4494    | 350.9039  | 304.94196 | 29.613138  | 4.9999995 |
| 23.738605  | 26.904932  | 31.113564 | 31.015223 | 9.729845   | 4.9999995 |
| 81.37949   | 134.1394   | 61.97413  | 105.22427 | 38.30813   | 20.475481 |
| 81.37949   | 134.1394   | 61.97413  | 105.22427 | 38.30813   | 20.475481 |
| 37.07725   | 89.51384   | 36.935383 | 76.39331  | 9.274922   | 4.9999995 |
| 910.2368   | 441.1075   | 405.48926 | 514.4209  | 127.574936 | 55.978924 |
| 1135.5974  | 1109.404   | 1136.1403 | 1390.3815 | 173.89629  | 182.87279 |
| 122.866394 | 102.303696 | 80.28244  | 105.80203 | 29.038994  | 30.276709 |
| 47.77191   | 50.476845  | 126.63198 | 132.7857  | 25.50075   | 4.9999995 |
| 255.39691  | 129.29218  | 550.48627 | 428.9161  | 127.5641   | 76.43286  |
| 299.8335   | 103.628685 | 165.05005 | 184.57042 | 98.57337   | 42.420216 |
| 3745.5928  | 3801.4397  | 2066.339  | 3708.9824 | 483.48486  | 286.46237 |
| 399.23758  | 1578.845   | 366.43637 | 1118.7177 | 140.0548   | 98.14755  |
| 78.13733   | 28.989214  | 61.305878 | 57.201733 | 22.582611  | 14.287958 |
| 232.64981  | 95.527214  | 110.23384 | 132.56071 | 38.557636  | 23.55926  |
| 232.64981  | 95.527214  | 110.23384 | 132.56071 | 38.557636  | 23.55926  |
| 232.64981  | 95.527214  | 110.23384 | 132.56071 | 38.557636  | 23.55926  |
| 153.20067  | 467.18906  | 183.12961 | 404.37064 | 30.565104  | 27.9801   |
| 11784.882  | 16959.373  | 8316.677  | 15341.504 | 1625.1047  | 1404.5197 |
| 35.11544   | 44.270584  | 39.027573 | 30.034164 | 14.308558  | 8.463162  |
| 35.11544   | 44.270584  | 39.027573 | 30.034164 | 14.308558  | 8.463162  |
| 115.740326 | 144.42572  | 77.67251  | 115.37874 | 23.560202  | 10.679379 |
| 54.891636  | 34.733414  | 44.567142 | 43.94274  | 12.35747   | 6.9413066 |
| 54.891636  | 34.733414  | 44.567142 | 43.94274  | 12.35747   | 6.9413066 |
| 160.01761  | 102.37767  | 145.17715 | 166.92212 | 32.57608   | 12.921641 |
| 349.24677  | 681.7682   | 256.162   | 508.03323 | 86.79244   | 74.771904 |
| 145.61818  | 363.71515  | 254.99078 | 364.34152 | 62.496582  | 78.90302  |
| 135.96185  | 70.173035  | 21.239298 | 47.313232 | 13.918319  | 12.703568 |
| 331.78998  | 324.6774   | 105.66322 | 180.51633 | 53.697933  | 30.42245  |
| 331.78998  | 324.6774   | 105.66322 | 180.51633 | 53.697933  | 30.42245  |
| 331.78998  | 324.6774   | 105.66322 | 180.51633 | 53.697933  | 30.42245  |
| 79.807526  | 62.148937  | 213.23346 | 182.17726 | 47.86345   | 93.54285  |
| 38.0659    | 50.298897  | 15.504508 | 23.405708 | 10.05062   | 7.2660246 |
| 651.98663  | 1667.174   | 346.57944 | 1174.6616 | 128.3363   | 80.669716 |
| 75.75401   | 49.419807  | 78.89788  | 86.97433  | 21.349552  | 14.13898  |
| 281.2068   | 101.49039  | 225.67546 | 242.21951 | 53.98885   | 34.316433 |
| 18.166979  | 30.447226  | 12.837561 | 23.314425 | 7.071251   | 4.9999995 |
| 771.2491   | 1361.9851  | 1722.7456 | 1954.2493 | 370.93552  | 265.6616  |
| 771.2491   | 1361.9851  | 1722.7456 | 1954.2493 | 370.93552  | 265.6616  |
| 32739.246  | 32173.625  | 45794.426 | 48889.633 | 9585.252   | 11876.891 |
| 965.54407  | 50.01241   | 6943.351  | 5659.7407 | 4.9999995  | 4.9999995 |
| 4634.9897  | 5872.0034  | 1435.8317 | 4251.0464 | 546.636    | 483.2564  |
| 223.77031  | 67.2321    | 100.61742 | 102.89479 | 51.346947  | 10.46524  |
| 223.77031  | 67.2321    | 100.61742 | 102.89479 | 51.346947  | 10.46524  |

|            |           |            |            |           |           |
|------------|-----------|------------|------------|-----------|-----------|
| 15.101159  | 15.525481 | 12.463801  | 11.8335495 | 5.580175  | 5.6142583 |
| 15.101159  | 15.525481 | 12.463801  | 11.8335495 | 5.580175  | 5.6142583 |
| 163.89282  | 127.06508 | 52.95635   | 87.73105   | 8.001393  | 8.412938  |
| 21.684946  | 22.808752 | 15.540362  | 14.219781  | 5.220228  | 5.223381  |
| 46.52266   | 14.597543 | 21.92869   | 15.962531  | 6.1078196 | 6.3650327 |
| 12.720709  | 11.63459  | 10.802989  | 5.306273   | 5.0707    | 4.7696514 |
| 29.305582  | 14.62325  | 18.673283  | 12.3873    | 5.5773425 | 5.7771635 |
| 4.9999995  | 83.736046 | 14.095279  | 37.686283  | 5.3893533 | 4.147052  |
| 13.329058  | 4.9999995 | 4.9999995  | 9.285926   | 6.0416627 | 3.949644  |
| 268.3809   | 217.14818 | 344.56873  | 236.37231  | 11.193956 | 9.617431  |
| 31.534204  | 88.61749  | 21.782988  | 52.148354  | 6.607952  | 6.962137  |
| 504.33652  | 789.1381  | 773.4592   | 626.3469   | 11.089832 | 10.757927 |
| 504.33652  | 789.1381  | 773.4592   | 626.3469   | 11.089832 | 10.757927 |
| 2496.69    | 2349.769  | 2027.7277  | 1781.7379  | 12.127857 | 12.252377 |
| 115.991196 | 56.36133  | 59.679546  | 43.125893  | 7.245403  | 8.07393   |
| 115.991196 | 56.36133  | 59.679546  | 43.125893  | 7.245403  | 8.07393   |
| 115.991196 | 56.36133  | 59.679546  | 43.125893  | 7.245403  | 8.07393   |
| 4.9999995  | 19.45441  | 11.10472   | 12.1116705 | 3.2738295 | 3.0900133 |
| 49.367126  | 8.825499  | 131.39607  | 51.9408    | 7.1903667 | 5.765414  |
| 32.288235  | 9.530474  | 7.7434525  | 6.8883057  | 4.7000003 | 4.8119617 |
| 35.628155  | 16.94805  | 29.319098  | 20.374092  | 6.2712216 | 6.840281  |
| 35.628155  | 16.94805  | 29.319098  | 20.374092  | 6.2712216 | 6.840281  |
| 20.502142  | 5.7826123 | 4.9999995  | 7.631904   | 4.4259925 | 5.149482  |
| 195.22267  | 82.9058   | 140.74403  | 94.99664   | 8.774443  | 7.7588778 |
| 134.66158  | 236.49274 | 317.59927  | 239.74586  | 10.196391 | 10.496512 |
| 29.134766  | 39.642517 | 28.805555  | 28.048952  | 6.7039247 | 7.075101  |
| 34.1961    | 10.47798  | 23.80802   | 12.346     | 5.424624  | 5.9727454 |
| 186.89676  | 85.49971  | 154.49779  | 84.78201   | 8.275676  | 9.463863  |
| 117.20668  | 38.458324 | 49.2947    | 33.324993  | 7.5417705 | 7.0844865 |
| 682.9901   | 477.5672  | 724.71136  | 460.2733   | 11.06766  | 10.708962 |
| 186.33165  | 188.74057 | 202.3786   | 159.51405  | 8.522138  | 8.945379  |
| 19.002295  | 9.196097  | 23.759195  | 11.205799  | 5.911231  | 5.9490223 |
| 63.040897  | 27.74283  | 78.85307   | 38.29481   | 7.1355205 | 6.865786  |
| 63.040897  | 27.74283  | 78.85307   | 38.29481   | 7.1355205 | 6.865786  |
| 63.040897  | 27.74283  | 78.85307   | 38.29481   | 7.1355205 | 6.865786  |
| 39.85992   | 30.759157 | 12.833931  | 16.7398    | 7.036104  | 7.4182854 |
| 1671.536   | 2602.5115 | 3615.2495  | 2546.2097  | 13.134815 | 12.797764 |
| 23.408772  | 13.668818 | 8.313623   | 13.700049  | 5.3830338 | 5.403407  |
| 23.408772  | 13.668818 | 8.313623   | 13.700049  | 5.3830338 | 5.403407  |
| 40.86925   | 21.75346  | 47.861855  | 31.03689   | 6.1948295 | 6.332045  |
| 24.48424   | 9.947154  | 6.0626626  | 9.359693   | 5.894414  | 6.171751  |
| 24.48424   | 9.947154  | 6.0626626  | 9.359693   | 5.894414  | 6.171751  |
| 59.01153   | 24.012169 | 50.243202  | 31.30342   | 6.5900054 | 6.5178013 |
| 88.10422   | 62.391922 | 123.09699  | 84.57569   | 7.938771  | 8.005108  |
| 40.191082  | 121.6335  | 128.4872   | 111.69561  | 7.8464494 | 8.385143  |
| 18.44019   | 21.996626 | 13.673229  | 17.715067  | 6.0988364 | 5.036575  |
| 54.95688   | 38.043686 | 48.290215  | 50.525818  | 7.635591  | 7.2920423 |
| 54.95688   | 38.043686 | 48.290215  | 50.525818  | 7.635591  | 7.2920423 |
| 54.95688   | 38.043686 | 48.290215  | 50.525818  | 7.635591  | 7.2920423 |
| 8.927493   | 27.070665 | 4.9999995  | 18.590733  | 7.9308023 | 8.891282  |
| 18.65725   | 4.9999995 | 9.003551   | 11.25537   | 4.8902235 | 4.687924  |
| 170.60808  | 212.85687 | 146.96355  | 155.69249  | 9.128752  | 9.383112  |
| 34.354576  | 11.2319   | 17.728638  | 10.15884   | 6.1939445 | 6.8808627 |
| 78.36412   | 35.159435 | 63.65165   | 48.232533  | 7.194901  | 6.485219  |
| 10.713859  | 4.9999995 | 10.4301195 | 5.674152   | 3.8186889 | 4.0894413 |
| 542.10803  | 333.09378 | 480.18607  | 329.69763  | 9.972914  | 10.463493 |
| 542.10803  | 333.09378 | 480.18607  | 329.69763  | 9.972914  | 10.463493 |
| 5437.151   | 10723.617 | 14990.009  | 10697.379  | 15.194954 | 15.56402  |
| 4.9999995  | 12.47583  | 4.9999995  | 4.9999995  | 8.435698  | 5.2184324 |
| 585.80194  | 850.67084 | 795.4123   | 696.25037  | 11.157704 | 9.921005  |
| 93.16481   | 31.1859   | 10.79869   | 16.05695   | 6.557001  | 4.543225  |
| 93.16481   | 31.1859   | 10.79869   | 16.05695   | 6.557001  | 4.543225  |

|            |           |            |            |            |           |
|------------|-----------|------------|------------|------------|-----------|
| 5.9440107  | 5.2490444 | 5.4014916  | 5.2619033  | 4.221769   | 5.0212007 |
| 5.9440107  | 5.2490444 | 5.4014916  | 5.2619033  | 4.221769   | 5.0212007 |
| 7.756576   | 7.6724052 | 8.0817795  | 7.5032816  | 6.733922   | 6.520251  |
| 5.4203696  | 4.891742  | 5.6089435  | 5.4746904  | 4.230795   | 3.7075639 |
| 5.591584   | 5.297826  | 5.768214   | 5.435169   | 4.9664836  | 3.9111662 |
| 4.926651   | 4.730274  | 4.093437   | 3.9989493  | 2.3467326  | 4.107153  |
| 5.299771   | 4.810434  | 5.517968   | 5.165352   | 4.1370273  | 4.107901  |
| 6.016551   | 8.461049  | 10.344941  | 9.884054   | 3.3796728  | 4.5074472 |
| 6.9679394  | 3.5258389 | 3.678391   | 2.8577027  | 3.26634    | 2.4279919 |
| 12.051443  | 11.971611 | 10.368048  | 11.086041  | 8.063625   | 8.3694105 |
| 6.3292575  | 7.5502944 | 7.0601554  | 7.43577    | 4.830284   | 5.555982  |
| 11.509357  | 10.369906 | 11.194374  | 11.018895  | 8.837509   | 8.8645    |
| 11.509357  | 10.369906 | 11.194374  | 11.018895  | 8.837509   | 8.8645    |
| 12.059278  | 14.167015 | 11.993926  | 13.36438   | 11.0612545 | 10.864643 |
| 6.965077   | 7.5596147 | 7.7857533  | 7.5367417  | 6.28343    | 5.554864  |
| 6.965077   | 7.5596147 | 7.7857533  | 7.5367417  | 6.28343    | 5.554864  |
| 6.965077   | 7.5596147 | 7.7857533  | 7.5367417  | 6.28343    | 5.554864  |
| 3.9343784  | 7.04215   | 5.5478826  | 6.375268   | 2.3467326  | 2.4279919 |
| 8.229831   | 5.565685  | 8.199354   | 7.708346   | 5.1190248  | 2.4279919 |
| 4.260743   | 4.286852  | 4.8187933  | 4.501006   | 3.505611   | 2.4279919 |
| 6.0297656  | 6.7384973 | 5.7611837  | 6.1969643  | 5.493387   | 5.1877437 |
| 6.0297656  | 6.7384973 | 5.7611837  | 6.1969643  | 5.493387   | 5.1877437 |
| 4.8971243  | 6.1319814 | 5.0536613  | 5.745844   | 3.426033   | 2.4279919 |
| 9.463334   | 8.474819  | 8.406461   | 8.433533   | 7.228176   | 6.659801  |
| 9.774508   | 9.791647  | 9.888836   | 9.853557   | 7.6924233  | 8.366545  |
| 6.619802   | 6.328231  | 6.1261964  | 6.2066355  | 5.089304   | 5.759997  |
| 5.260334   | 5.2640877 | 6.7629538  | 6.526549   | 4.9178734  | 2.4279919 |
| 7.6624255  | 6.6858573 | 8.847273   | 8.173292   | 7.2277017  | 7.105103  |
| 7.8918023  | 6.3452587 | 7.13914    | 7.0017366  | 6.856805   | 6.253792  |
| 11.508128  | 11.550407 | 10.727373  | 11.242085  | 9.185387   | 9.027562  |
| 8.29204    | 10.320081 | 8.2645235  | 9.542218   | 7.357365   | 7.4721193 |
| 5.9716144  | 4.3980055 | 5.747101   | 5.3382306  | 4.73555    | 4.6488047 |
| 7.538528   | 6.2262073 | 6.567598   | 6.5235806  | 5.502432   | 5.3880587 |
| 7.538528   | 6.2262073 | 6.567598   | 6.5235806  | 5.502432   | 5.3880587 |
| 7.538528   | 6.2262073 | 6.567598   | 6.5235806  | 5.502432   | 5.3880587 |
| 6.9284525  | 8.553777  | 7.28867    | 8.089065   | 5.16627    | 5.6443367 |
| 13.200209  | 13.739205 | 12.706604  | 13.2776375 | 10.966507  | 11.331601 |
| 4.817517   | 5.0583897 | 5.1287136  | 4.4567623  | 4.0669613  | 3.8510356 |
| 4.817517   | 5.0583897 | 5.1287136  | 4.4567623  | 4.0669613  | 3.8510356 |
| 6.5357842  | 6.8468814 | 6.0746307  | 6.327792   | 4.7990713  | 4.2057467 |
| 5.4633427  | 4.6809225 | 5.317424   | 4.9749517  | 3.856246   | 3.5589366 |
| 5.4633427  | 4.6809225 | 5.317424   | 4.9749517  | 3.856246   | 3.5589366 |
| 6.9878607  | 6.3289576 | 6.961946   | 6.8594003  | 5.256826   | 4.4887533 |
| 8.10952    | 9.109448  | 7.761488   | 8.415353   | 6.668409   | 7.068444  |
| 6.8613634  | 8.182675  | 7.7539873  | 7.9416356  | 6.200468   | 7.151573  |
| 6.7627482  | 5.7663975 | 4.3055325  | 5.077414   | 4.024627   | 4.464144  |
| 8.042403   | 8.023324  | 6.5080023  | 6.9697366  | 5.984077   | 5.765588  |
| 8.042403   | 8.023324  | 6.5080023  | 6.9697366  | 5.984077   | 5.765588  |
| 8.042403   | 8.023324  | 6.5080023  | 6.9697366  | 5.984077   | 5.765588  |
| 6.003419   | 5.5830975 | 7.4952927  | 6.982366   | 5.8129916  | 7.399451  |
| 4.9364414  | 5.259838  | 3.880103   | 4.099309   | 3.5536509  | 3.6230757 |
| 8.984114   | 10.397721 | 8.178058   | 9.613273   | 7.2356753  | 7.185997  |
| 5.9262476  | 5.236319  | 6.0984163  | 5.924327   | 4.654578   | 4.6320844 |
| 7.7982454  | 6.3167596 | 7.56967    | 7.3756456  | 5.992336   | 5.940664  |
| 3.8642788  | 4.478991  | 3.6219935  | 4.0965295  | 3.0157905  | 2.4279919 |
| 9.242205   | 10.090847 | 10.4563    | 10.350957  | 8.800274   | 8.916411  |
| 9.242205   | 10.090847 | 10.4563    | 10.350957  | 8.800274   | 8.916411  |
| 14.7137985 | 14.66977  | 15.043529  | 14.9140005 | 13.498958  | 14.423648 |
| 9.547023   | 5.2512894 | 12.4406595 | 11.839555  | 2.3467326  | 2.4279919 |
| 11.824774  | 12.181334 | 10.209119  | 11.453185  | 9.370539   | 9.783263  |
| 7.4838247  | 5.702115  | 6.439118   | 6.1660147  | 5.918398   | 4.1750994 |
| 7.4838247  | 5.702115  | 6.439118   | 6.1660147  | 5.918398   | 4.1750994 |

|           |           |           |           |
|-----------|-----------|-----------|-----------|
| 3.9811304 | 4.0984774 | 3.9156823 | 3.864434  |
| 3.9811304 | 4.0984774 | 3.9156823 | 3.864434  |
| 7.3039308 | 7.3569174 | 5.9956584 | 6.902258  |
| 4.4734273 | 4.6874986 | 4.229629  | 4.1431713 |
| 5.538986  | 4.002629  | 4.7282124 | 4.3169026 |
| 3.7500198 | 3.6531522 | 3.7109392 | 2.6784322 |
| 4.8932486 | 4.0054483 | 4.4908953 | 3.9317322 |
| 2.350709  | 6.7147865 | 4.088671  | 5.6432543 |
| 3.8107257 | 2.3408759 | 2.3618152 | 3.4982371 |
| 8.015125  | 8.17238   | 8.663923  | 8.419092  |
| 4.9934807 | 6.8007755 | 4.718278  | 6.1319814 |
| 8.931026  | 10.092948 | 9.827123  | 9.842656  |
| 8.931026  | 10.092948 | 9.827123  | 9.842656  |
| 11.243219 | 11.697415 | 11.247831 | 11.39726  |
| 6.8189287 | 6.1015563 | 6.1653085 | 5.8504467 |
| 6.8189287 | 6.1015563 | 6.1653085 | 5.8504467 |
| 6.8189287 | 6.1015563 | 6.1653085 | 5.8504467 |
| 2.350709  | 4.4372454 | 3.7498775 | 3.900678  |
| 5.625095  | 3.2401462 | 7.281335  | 6.127673  |
| 5.025608  | 3.3489451 | 3.2481415 | 3.0429091 |
| 5.1579037 | 4.2245765 | 5.152258  | 4.687096  |
| 5.1579037 | 4.2245765 | 5.152258  | 4.687096  |
| 4.3987904 | 2.643308  | 2.3618152 | 3.1986172 |
| 7.560084  | 6.69963   | 7.372795  | 7.026403  |
| 7.028619  | 8.305137  | 8.554007  | 8.4397135 |
| 4.8851585 | 5.5455427 | 5.1255145 | 5.1843    |
| 5.1085196 | 3.4940498 | 4.8440294 | 3.9280639 |
| 7.497245  | 6.7483788 | 7.49937   | 6.8571515 |
| 6.8335066 | 5.5001483 | 5.8952074 | 5.4528213 |
| 9.3618145 | 9.343954  | 9.730056  | 9.404734  |
| 7.4929805 | 7.9559665 | 7.912108  | 7.8194895 |
| 4.2978034 | 3.295794  | 4.8423557 | 3.780768  |
| 5.962536  | 4.996209  | 6.5615597 | 5.6680174 |
| 5.962536  | 4.996209  | 6.5615597 | 5.6680174 |
| 5.962536  | 4.996209  | 6.5615597 | 5.6680174 |
| 5.3143153 | 5.1523995 | 3.957766  | 4.388653  |
| 10.646077 | 11.852957 | 12.108326 | 11.928577 |
| 4.5791698 | 3.896771  | 3.3489451 | 4.0896487 |
| 4.5791698 | 3.896771  | 3.3489451 | 4.0896487 |
| 5.3506637 | 4.610817  | 5.8547955 | 5.347856  |
| 4.638044  | 3.4145653 | 2.9190226 | 3.510912  |
| 4.638044  | 3.4145653 | 2.9190226 | 3.510912  |
| 5.8695827 | 4.7677107 | 5.9228053 | 5.3618617 |
| 6.428979  | 6.2618966 | 7.1929398 | 6.8538656 |
| 5.326988  | 7.2850866 | 7.2487216 | 7.2716055 |
| 4.257909  | 4.6271977 | 4.043961  | 4.4706144 |
| 5.771663  | 5.4840956 | 5.8666234 | 6.0869474 |
| 5.771663  | 5.4840956 | 5.8666234 | 6.0869474 |
| 5.771663  | 5.4840956 | 5.8666234 | 6.0869474 |
| 3.2784464 | 4.956358  | 2.3618152 | 4.5422273 |
| 4.2712398 | 2.3408759 | 3.4557133 | 3.7869997 |
| 7.366003  | 8.1410055 | 7.4270854 | 7.7835183 |
| 5.1147532 | 3.6003551 | 4.421072  | 3.63784   |
| 6.2574377 | 5.3650203 | 6.258095  | 6.0174527 |
| 3.5216076 | 2.3408759 | 3.6647577 | 2.766468  |
| 9.032396  | 8.825093  | 9.14473   | 8.905782  |
| 9.032396  | 8.825093  | 9.14473   | 8.905782  |
| 12.370878 | 13.82473  | 14.148254 | 13.965917 |
| 2.350709  | 3.7574043 | 2.3618152 | 2.352752  |
| 9.138176  | 10.208026 | 9.869025  | 10.003053 |
| 6.5068955 | 5.175134  | 3.7096405 | 4.325995  |
| 6.5068955 | 5.175134  | 3.7096405 | 4.325995  |



|                 |               |                     |      |       |   |
|-----------------|---------------|---------------------|------|-------|---|
| NR_047672       | SLC4A8        | RefSeq              | 520  | chr12 | + |
| NR_047672       | SLC4A8        | RefSeq              | 520  | chr12 | + |
| NR_047672       | SLC4A8        | RefSeq              | 520  | chr12 | + |
| ENST00000452026 | CCT6P3        | pseudogene          | 1383 | chr7  | + |
| ENST00000563472 | RP11-31E22.1  | GENCODE             | 478  | chr15 | - |
| ENST00000521989 | RP11-150O12.6 | GENCODE             | 470  | chr8  | - |
| ENST00000452785 | RP4-533D7.5   | GENCODE             | 359  | chr1  | + |
| ENST00000414157 | RP11-462L8.1  | GENCODE             | 1041 | chr10 | + |
| ENST00000414157 | RP11-462L8.1  | GENCODE             | 1041 | chr10 | + |
| NR_033890       | LOC338817     | RefSeq              | 3684 | chr12 | + |
| TCONS_00023170  | XLOC_011119   | LincRNAs identified | 913  | chr14 | - |
| TCONS_00004374  | XLOC_002258   | LincRNAs identified | 2671 | chr2  | - |
| ENST00000566793 | ULK4P2        | GENCODE             | 582  | chr15 | + |
| ENST00000523331 | RP1-170O19.14 | GENCODE             | 556  | chr7  | - |
| ENST00000561978 | PCAT1         | GENCODE             | 1992 | chr8  | + |
| ENST00000561362 | RP11-20G13.3  | GENCODE             | 323  | chr15 | - |
| ENST00000502926 | PCDHGB8P      | GENCODE             | 1973 | chr5  | + |
| ENST00000502926 | PCDHGB8P      | GENCODE             | 1973 | chr5  | + |
| ENST00000502926 | PCDHGB8P      | GENCODE             | 1973 | chr5  | + |
| ENST00000502926 | PCDHGB8P      | GENCODE             | 1973 | chr5  | + |
| ENST00000502926 | PCDHGB8P      | GENCODE             | 1973 | chr5  | + |
| ENST00000502926 | PCDHGB8P      | GENCODE             | 1973 | chr5  | + |
| ENST00000502926 | PCDHGB8P      | GENCODE             | 1973 | chr5  | + |
| ENST00000502926 | PCDHGB8P      | GENCODE             | 1973 | chr5  | + |
| ENST00000502926 | PCDHGB8P      | GENCODE             | 1973 | chr5  | + |
| ENST00000502926 | PCDHGB8P      | GENCODE             | 1973 | chr5  | + |
| ENST00000502926 | PCDHGB8P      | GENCODE             | 1973 | chr5  | + |
| ENST00000502926 | PCDHGB8P      | GENCODE             | 1973 | chr5  | + |
| ENST00000502926 | PCDHGB8P      | GENCODE             | 1973 | chr5  | + |
| ENST00000502926 | PCDHGB8P      | GENCODE             | 1973 | chr5  | + |
| ENST00000502926 | PCDHGB8P      | GENCODE             | 1973 | chr5  | + |
| ENST00000502926 | PCDHGB8P      | GENCODE             | 1973 | chr5  | + |
| ENST00000502926 | PCDHGB8P      | GENCODE             | 1973 | chr5  | + |
| ENST00000502926 | PCDHGB8P      | GENCODE             | 1973 | chr5  | + |
| ENST00000502926 | PCDHGB8P      | GENCODE             | 1973 | chr5  | + |
| ENST00000533708 | RP11-113K21.5 | GENCODE             | 825  | chr11 | + |
| ENST00000565044 | RP11-734K21.5 | GENCODE             | 3273 | chr2  | + |
| ENST00000452465 | RP11-98G7.1   | GENCODE             | 675  | chr1  | - |
| ENST00000565625 | RP11-352B15.1 | GENCODE             | 726  | chr16 | + |
| uc003hoz.1      | AK095285      | UCSC_knowngene      | 2838 | chr4  | - |
| ENST00000522471 | RP11-150O12.3 | GENCODE             | 397  | chr8  | - |
| TCONS_00003675  | XLOC_001469   | LincRNAs identified | 636  | chr2  | + |
| ENST00000577281 | RP11-57A1.1   | GENCODE             | 636  | chr17 | + |
| TCONS_00020322  | XLOC_009653   | LincRNAs identified | 832  | chr12 | + |
| ENST00000541092 | RP11-685N10.1 | GENCODE             | 581  | chr11 | - |
| ENST00000541092 | RP11-685N10.1 | GENCODE             | 581  | chr11 | - |
| ENST00000412295 | CTC-338M12.9  | GENCODE             | 549  | chr5  | + |
| ENST00000551881 | AL589743.1    | GENCODE             | 2239 | chr14 | + |
| ENST00000527908 | RP11-429J17.5 | GENCODE             | 299  | chr8  | - |
| ENST00000425587 | RP11-561O23.8 | GENCODE             | 340  | chr9  | + |
| ENST00000449469 | RP4-564F22.2  | GENCODE             | 2138 | chr20 | - |
| uc002tzb.1      | AK128708      | UCSC_knowngene      | 5089 | chr2  | - |
| ENST00000477247 | FAM86DP       | pseudogene          | 986  | chr3  | - |
| ENST00000577198 | KRT18P55      | GENCODE             | 1950 | chr17 | - |
| uc002pdz.1      | AK096622      | UCSC_knowngene      | 3230 | chr19 | - |
| ENST00000421599 | SNHG11        | GENCODE             | 1046 | chr20 | + |
| ENST00000424521 | RP3-453D15.1  | GENCODE             | 138  | chr6  | + |
| NR_034002       | MCF2L-AS1     | RefSeq              | 1173 | chr13 | - |
| NR_034002       | MCF2L-AS1     | RefSeq              | 1173 | chr13 | - |
| NR_034002       | MCF2L-AS1     | RefSeq              | 1173 | chr13 | - |
| NR_034002       | MCF2L-AS1     | RefSeq              | 1173 | chr13 | - |
| NR_037894       | ZNF670-ZNF695 | RefSeq              | 1119 | chr1  | - |





|                 |          |                           |           |           |
|-----------------|----------|---------------------------|-----------|-----------|
| NM_001258402    | SLC4A8   | electroneutral sodiun +   | 51818593  | 51868361  |
| NM_001258403    | SLC4A8   | electroneutral sodiun +   | 51818900  | 51874391  |
| NM_001267615    | SLC4A8   | electroneutral sodiun +   | 51785100  | 51868361  |
| NM_152336       | AGBL1    | cytosolic carboxypep +    | 86685241  | 87572283  |
| ENST00000540385 | PIK3R3   | phosphoinositide-3-k -    | 46509332  | 46642160  |
| ENST00000475184 | ITGB1    | integrin, beta 1 (fibrc - | 33218751  | 33294720  |
| ENST00000534049 | ITGB1    | integrin, beta 1 (fibrc - | 33217139  | 33281391  |
| NM_003736       | PCDHGB4  | protocadherin gamm: +     | 140767451 | 140892546 |
| NM_018912       | PCDHGA1  | protocadherin gamm: +     | 140710251 | 140892546 |
| NM_018913       | PCDHGA10 | protocadherin gamm: +     | 140792742 | 140892546 |
| NM_018914       | PCDHGA11 | protocadherin gamm: +     | 140800536 | 140892546 |
| NM_018915       | PCDHGA2  | protocadherin gamm: +     | 140718353 | 140892546 |
| NM_018916       | PCDHGA3  | protocadherin gamm: +     | 140723600 | 140892546 |
| NM_018917       | PCDHGA4  | protocadherin gamm: +     | 140734767 | 140892546 |
| NM_018918       | PCDHGA5  | protocadherin gamm: +     | 140743897 | 140892546 |
| NM_018919       | PCDHGA6  | protocadherin gamm: +     | 140753650 | 140892546 |
| NM_018920       | PCDHGA7  | protocadherin gamm: +     | 140762466 | 140892546 |
| NM_018921       | PCDHGA9  | protocadherin gamm: +     | 140782519 | 140892546 |
| NM_018922       | PCDHGB1  | protocadherin gamm: +     | 140729827 | 140892546 |
| NM_018923       | PCDHGB2  | protocadherin gamm: +     | 140739702 | 140892546 |
| NM_018924       | PCDHGB3  | protocadherin gamm: +     | 140749961 | 140892546 |
| NM_018925       | PCDHGB5  | protocadherin gamm: +     | 140777694 | 140892546 |
| NM_018926       | PCDHGB6  | protocadherin gamm: +     | 140787769 | 140892546 |
| NM_018927       | PCDHGB7  | protocadherin gamm: +     | 140797259 | 140892548 |
| NM_032088       | PCDHGA8  | protocadherin gamm: +     | 140771482 | 140892546 |
| NM_032092       | PCDHGA11 | protocadherin gamm: +     | 140800536 | 140892546 |
| NM_014488       | RAB30    | ras-related protein R: -  | 82692477  | 82782884  |
| NM_005590       | MRE11A   | double-strand break 1 -   | 94150468  | 94227040  |
| NM_005591       | MRE11A   | double-strand break 1 -   | 94150468  | 94227040  |
| NM_139021       | MAPK15   | mitogen-activated pr: +   | 144798506 | 144804633 |
| ENST00000409572 | NR4A2    | nuclear receptor subf -   | 157181609 | 157198860 |
| ENST00000375608 | MCF2L    | MCF.2 cell line deriv +   | 113548691 | 113751175 |
| ENST00000442652 | MCF2L    | MCF.2 cell line deriv +   | 113556506 | 113750999 |
| ENST00000375604 | MCF2L    | MCF.2 cell line deriv +   | 113622756 | 113752862 |
| ENST00000397030 | MCF2L    | MCF.2 cell line deriv +   | 113622813 | 113754053 |
| NM_001204220    | ZNF670   | zinc finger protein 67 -  | 247197939 | 247242115 |











|                      |                    |                    |                  |           |                  |
|----------------------|--------------------|--------------------|------------------|-----------|------------------|
| ASHGA5P019028        | 0.003158208        | 0.036419331        | 2.7231048        | up        | noncoding        |
| ASHGA5P019028        | 0.003158208        | 0.036419331        | 2.7231048        | up        | noncoding        |
| ASHGA5P019028        | 0.003158208        | 0.036419331        | 2.7231048        | up        | noncoding        |
| ASHGA5P029048        | 0.000101631        | 0.009142535        | 2.3363494        | up        | noncoding        |
| <b>ASHGA5P051945</b> | <b>0.009762279</b> | <b>0.061334043</b> | <b>2.1795039</b> | <b>up</b> | <b>noncoding</b> |
| ASHGA5P021677        | 4.93199E-05        | 0.007378879        | 2.5459392        | up        | noncoding        |
| ASHGA5P021677        | 4.93199E-05        | 0.007378879        | 2.5459392        | up        | noncoding        |
| ASHGA5P021677        | 4.93199E-05        | 0.007378879        | 2.5459392        | up        | noncoding        |
| ASHGA5P046369        | 0.01174859         | 0.066707739        | 2.1168998        | up        | noncoding        |
| ASHGA5P046369        | 0.01174859         | 0.066707739        | 2.1168998        | up        | noncoding        |
| ASHGA5P046369        | 0.01174859         | 0.066707739        | 2.1168998        | up        | noncoding        |
| ASHGA5P046369        | 0.01174859         | 0.066707739        | 2.1168998        | up        | noncoding        |
| ASHGA5P046369        | 0.01174859         | 0.066707739        | 2.1168998        | up        | noncoding        |
| ASHGA5P046369        | 0.01174859         | 0.066707739        | 2.1168998        | up        | noncoding        |
| ASHGA5P046369        | 0.01174859         | 0.066707739        | 2.1168998        | up        | noncoding        |
| ASHGA5P023105        | 0.002476491        | 0.032328309        | 4.8525609        | up        | noncoding        |
| ASHGA5P028420        | 0.001894347        | 0.029145997        | 2.98288          | up        | noncoding        |
| ASHGA5P043647        | 0.02753922         | 0.10367037         | 2.6601935        | up        | noncoding        |
| ASHGA5P033327        | 0.04644992         | 0.139076571        | 2.0091339        | up        | noncoding        |
| ASHGA5P023932        | 0.016158815        | 0.077740057        | 2.8561373        | up        | noncoding        |
| ASHGA5P019290        | 0.004749027        | 0.043793775        | 3.0430231        | up        | noncoding        |
| ASHGA5P019290        | 0.004749027        | 0.043793775        | 3.0430231        | up        | noncoding        |
| ASHGA5P019290        | 0.004749027        | 0.043793775        | 3.0430231        | up        | noncoding        |
| ASHGA5P019290        | 0.004749027        | 0.043793775        | 3.0430231        | up        | noncoding        |
| ASHGA5P035999        | 0.000258044        | 0.012170274        | 3.0677421        | up        | noncoding        |
| ASHGA5P019608        | 0.006272828        | 0.05052414         | 2.4036721        | up        | noncoding        |
| ASHGA5P052417        | 0.000365036        | 0.013617271        | 7.0007248        | up        | noncoding        |
| ASHGA5P052417        | 0.000365036        | 0.013617271        | 7.0007248        | up        | noncoding        |
| ASHGA5P035220        | 0.017243265        | 0.079995624        | 2.3881179        | up        | noncoding        |
| ASHGA5P028708        | 0.000129557        | 0.010460795        | 2.2159346        | up        | noncoding        |
| ASHGA5P028708        | 0.000129557        | 0.010460795        | 2.2159346        | up        | noncoding        |
| ASHGA5P028708        | 0.000129557        | 0.010460795        | 2.2159346        | up        | noncoding        |
| ASHGA5P028708        | 0.000129557        | 0.010460795        | 2.2159346        | up        | noncoding        |
| ASHGA5P028708        | 0.000129557        | 0.010460795        | 2.2159346        | up        | noncoding        |
| ASHGA5P028503        | 0.009691162        | 0.061042328        | 2.1589977        | up        | noncoding        |
| ASHGA5P038049        | 0.001482688        | 0.025652132        | 2.7409518        | up        | noncoding        |
| ASHGA5P038049        | 0.001482688        | 0.025652132        | 2.7409518        | up        | noncoding        |
| ASHGA5P038049        | 0.001482688        | 0.025652132        | 2.7409518        | up        | noncoding        |
| ASHGA5P038049        | 0.001482688        | 0.025652132        | 2.7409518        | up        | noncoding        |
| ASHGA5P017189        | 0.006421986        | 0.050969566        | 2.6158373        | up        | noncoding        |
| ASHGA5P030683        | 0.04902838         | 0.143860354        | 3.9924104        | up        | noncoding        |
| ASHGA5P026001        | 0.01164981         | 0.066443866        | 2.5792308        | up        | noncoding        |
| ASHGA5P030794        | 0.000910504        | 0.02038276         | 2.6436897        | up        | noncoding        |
| ASHGA5P044944        | 0.01750118         | 0.080423645        | 2.0000403        | up        | noncoding        |
| ASHGA5P041281        | 7.1872E-06         | 0.003887603        | 22.0846006       | up        | noncoding        |
| ASHGA5P036817        | 0.015595958        | 0.07641666         | 2.1829021        | up        | noncoding        |
| ASHGA5P035523        | 0.000318375        | 0.012923818        | 5.8333715        | up        | noncoding        |
| ASHGA5P036776        | 0.001118745        | 0.022608782        | 2.6662357        | up        | noncoding        |
| ASHGA5P019958        | 0.013611377        | 0.071676095        | 2.1780808        | up        | noncoding        |
| ASHGA5P052066        | 8.76159E-05        | 0.008766146        | 2.1719444        | up        | noncoding        |
| ASHGA5P035623        | 0.001481762        | 0.025652132        | 4.1753088        | up        | noncoding        |
| ASHGA5P016692        | 0.000894402        | 0.020125432        | 2.654483         | up        | noncoding        |
| ASHGA5P048256        | 0.000350935        | 0.013409132        | 2.021685         | up        | noncoding        |
| ASHGA5P042821        | 0.02202383         | 0.091769495        | 3.9831349        | up        | noncoding        |
| ASHGA5P034586        | 0.014298077        | 0.073284489        | 2.0811012        | up        | noncoding        |
| ASHGA5P037245        | 2.16946E-05        | 0.005043652        | 2.9705319        | up        | noncoding        |
| ASHGA5P017065        | 0.003319571        | 0.037316455        | 3.1483472        | up        | noncoding        |
| ASHGA5P017065        | 0.003319571        | 0.037316455        | 3.1483472        | up        | noncoding        |
| ASHGA5P037315        | 0.008397347        | 0.057281529        | 2.6799961        | up        | noncoding        |
| ASHGA5P040423        | 0.003620117        | 0.038659181        | 2.0853846        | up        | noncoding        |
| ASHGA5P009811        | 0.014615791        | 0.073959919        | 2.6076621        | up        | noncoding        |
| ASHGA5P009811        | 0.014615791        | 0.073959919        | 2.6076621        | up        | noncoding        |
| ASHGA5P009811        | 0.014615791        | 0.073959919        | 2.6076621        | up        | noncoding        |
| ASHGA5P042691        | 0.001040646        | 0.021859875        | 3.2745133        | up        | noncoding        |
| ASHGA5P017159        | 0.01520177         | 0.075446109        | 2.6347925        | up        | noncoding        |



|                 |                |                     |       |       |   |
|-----------------|----------------|---------------------|-------|-------|---|
| NR_037894       | ZNF670-ZNF695  | RefSeq              | 1119  | chr1  | - |
| NR_037894       | ZNF670-ZNF695  | RefSeq              | 1119  | chr1  | - |
| NR_037894       | ZNF670-ZNF695  | RefSeq              | 1119  | chr1  | - |
| TCONS_00010341  | XLOC_004829    | LincRNAs identified | 378   | chr5  | - |
| ENST00000425653 | DANCR          | GENCODE             | 823   | chr4  | + |
| ENST00000545440 | SNHG1          | GENCODE             | 754   | chr11 | - |
| ENST00000545440 | SNHG1          | GENCODE             | 754   | chr11 | - |
| ENST00000545440 | SNHG1          | GENCODE             | 754   | chr11 | - |
| NR_024501       | FMR1-AS1       | RefSeq              | 2644  | chrX  | - |
| NR_024501       | FMR1-AS1       | RefSeq              | 2644  | chrX  | - |
| NR_024501       | FMR1-AS1       | RefSeq              | 2644  | chrX  | - |
| NR_024501       | FMR1-AS1       | RefSeq              | 2644  | chrX  | - |
| NR_024501       | FMR1-AS1       | RefSeq              | 2644  | chrX  | - |
| ENST00000570035 | AC004158.2     | GENCODE             | 831   | chr16 | - |
| ENST00000423023 | PSPC1-OT1      | GENCODE             | 376   | chr13 | - |
| ENST00000553157 | KDM5B-AS1      | GENCODE             | 551   | chr1  | + |
| uc001hwk.4      | BC016972       | UCSC_knowngene      | 888   | chr1  | - |
| HMlincRNA99+    | HMlincRNA99    | LincRNAs identified | 11479 | chr1  | + |
| NR_037583       | LEMD1          | RefSeq              | 779   | chr1  | - |
| NR_037583       | LEMD1          | RefSeq              | 779   | chr1  | - |
| NR_037583       | LEMD1          | RefSeq              | 779   | chr1  | - |
| NR_037583       | LEMD1          | RefSeq              | 779   | chr1  | - |
| uc002suw.1      | BC016831       | UCSC_knowngene      | 1119  | chr2  | + |
| NR_024526       | ARL6IP6        | RefSeq              | 1804  | chr2  | + |
| NR_036536       | SNHG4          | RefSeq              | 1047  | chr5  | + |
| NR_036536       | SNHG4          | RefSeq              | 1047  | chr5  | + |
| ENST00000567491 | AC133109.1     | GENCODE             | 1604  | chr2  | - |
| ENST00000421863 | ZMYM2-IT1      | GENCODE             | 550   | chr13 | + |
| ENST00000421863 | ZMYM2-IT1      | GENCODE             | 550   | chr13 | + |
| ENST00000421863 | ZMYM2-IT1      | GENCODE             | 550   | chr13 | + |
| ENST00000421863 | ZMYM2-IT1      | GENCODE             | 550   | chr13 | + |
| ENST00000421863 | ZMYM2-IT1      | GENCODE             | 550   | chr13 | + |
| ENST00000434565 | LINC00571      | GENCODE             | 521   | chr13 | - |
| ENST00000421637 | RP4-784A16.2   | GENCODE             | 675   | chr1  | + |
| ENST00000421637 | RP4-784A16.2   | GENCODE             | 675   | chr1  | + |
| ENST00000421637 | RP4-784A16.2   | GENCODE             | 675   | chr1  | + |
| ENST00000421637 | RP4-784A16.2   | GENCODE             | 675   | chr1  | + |
| ENST00000438705 | SNHG15         | GENCODE             | 509   | chr7  | - |
| ENST00000569846 | RP11-160C18.2  | GENCODE             | 568   | chr15 | + |
| uc010ady.1      | THSD1P1        | UCSC_knowngene      | 2336  | chr13 | - |
| uc021sxj.1      | AL109706       | UCSC_knowngene      | 2503  | chr15 | + |
| ENST00000521625 | KB-1083B1.1    | GENCODE             | 449   | chr8  | + |
| ENST00000514769 | RP11-138J23.1  | GENCODE             | 574   | chr5  | + |
| ENST00000419897 | RP11-465L10.10 | GENCODE             | 491   | chr20 | - |
| ENST00000447111 | AC079354.5     | GENCODE             | 311   | chr2  | - |
| ENST00000417578 | RP4-564F22.2   | GENCODE             | 880   | chr20 | - |
| ENST00000505873 | AC108142.1     | GENCODE             | 939   | chr4  | - |
| ENST00000509671 | RP11-125O18.1  | GENCODE             | 241   | chr4  | - |
| uc002vvo.1      | AF279775       | UCSC_knowngene      | 723   | chr2  | - |
| ENST00000433036 | AC133528.2     | GENCODE             | 415   | chr2  | + |
| ENST00000529253 | FAM86C2P       | GENCODE             | 1857  | chr11 | - |
| TCONS_00019368  | XLOC_009191    | LincRNAs identified | 1838  | chr11 | + |
| ENST00000445300 | RP11-431K24.1  | GENCODE             | 2044  | chr1  | + |
| ENST00000457162 | AF129075.5     | GENCODE             | 355   | chr21 | - |
| ENST00000437243 | AC092573.3     | GENCODE             | 336   | chr2  | - |
| ENST00000437243 | AC092573.3     | GENCODE             | 336   | chr2  | - |
| ENST00000419664 | AF064858.11    | GENCODE             | 509   | chr21 | - |
| TCONS_00022202  | XLOC_010428    | LincRNAs identified | 868   | chr13 | + |
| NR_026910       | ABHD11         | RefSeq              | 1462  | chr7  | - |
| NR_026910       | ABHD11         | RefSeq              | 1462  | chr7  | - |
| NR_026910       | ABHD11         | RefSeq              | 1462  | chr7  | - |
| TCONS_00014547  | XLOC_006924    | LincRNAs identified | 1836  | chr8  | + |
| ENST00000438380 | RP11-175D17.3  | GENCODE             | 617   | chr9  | + |

|           |           |                                            |                        |
|-----------|-----------|--------------------------------------------|------------------------|
| 247108848 | 247242115 | TACAGAAACCTG.100533111                     | exon sense-overlappi   |
| 247108848 | 247242115 | TACAGAAACCTG.100533111                     | exon sense-overlappi   |
| 247108848 | 247242115 | TACAGAAACCTG.100533111                     | exon sense-overlappi   |
| 55748450  | 55752589  | ATTTTTTAAGGACCATCTGGGCACA                  | intergenic             |
| 53578947  | 53580304  | ACCGTAACAATT                               | intergenic             |
| 62619723  | 62622960  | ENST00000537869, CTGATGACAGTC.23642        | bidirectional          |
| 62619723  | 62622960  | ENST00000537869, CTGATGACAGTC.23642        | bidirectional          |
| 62619723  | 62622960  | ENST00000537869, CTGATGACAGTC.23642        | bidirectional          |
| 146990948 | 147003676 | NR_024499, NR_02.AGACTTTGAAC.100126270     | natural antisense      |
| 146990948 | 147003676 | NR_024499, NR_02.AGACTTTGAAC.100126270     | natural antisense      |
| 146990948 | 147003676 | NR_024499, NR_02.AGACTTTGAAC.100126270     | natural antisense      |
| 146990948 | 147003676 | NR_024499, NR_02.AGACTTTGAAC.100126270     | natural antisense      |
| 146990948 | 147003676 | NR_024499, NR_02.AGACTTTGAAC.100126270     | natural antisense      |
| 72556036  | 72698908  | GATCTCAGGGAGGGGAAGGTATAA                   | intergenic             |
| 20248763  | 20250024  | GAAAAATATACTATGGAGATTAGAT                  | intergenic             |
| 202780081 | 202781284 | GCTGAGGATGGA.100506696                     | intergenic             |
| 235093089 | 235099746 | CCTGGGGGAATGAATCTTTCAGAGC                  | intergenic             |
| 200231279 | 200242758 | TAGGGACTCTTCATATTCATAAGGC.                 | intergenic             |
| 205350505 | 205391214 | CCAATACTACTGC.93273                        | exon sense-overlappi   |
| 205350505 | 205391214 | CCAATACTACTGC.93273                        | exon sense-overlappi   |
| 205350505 | 205391214 | CCAATACTACTGC.93273                        | exon sense-overlappi   |
| 205350505 | 205391214 | CCAATACTACTGC.93273                        | exon sense-overlappi   |
| 96331831  | 96334463  | TCTACAATTTTGGTTGACAGTCAAC                  | intergenic             |
| 153574406 | 153617767 | TACGCACCAGAG.151188                        | exon sense-overlappi   |
| 138609440 | 138618873 | AGCCCGTAAGCT.724102                        | exon sense-overlappi   |
| 138609440 | 138618873 | AGCCCGTAAGCT.724102                        | exon sense-overlappi   |
| 109743782 | 109745386 | NR_029193 AGCCATTGGGGCTGAATTTTCATTT        | bidirectional          |
| 20651664  | 20653696  | ATTTCTTCTGTAGATTCTCATTGGTT                 | intron sense-overlappi |
| 20651664  | 20653696  | ATTTCTTCTGTAGATTCTCATTGGTT                 | intron sense-overlappi |
| 20651664  | 20653696  | ATTTCTTCTGTAGATTCTCATTGGTT                 | intron sense-overlappi |
| 20651664  | 20653696  | ATTTCTTCTGTAGATTCTCATTGGTT                 | intron sense-overlappi |
| 38624953  | 38717369  | TAACAACAAAAT.100874188                     | intergenic             |
| 53753695  | 53755378  | CCGTTGTACACAGGTGAAGTCACTGT                 | natural antisense      |
| 53753695  | 53755378  | CCGTTGTACACAGGTGAAGTCACTGT                 | natural antisense      |
| 53753695  | 53755378  | CCGTTGTACACAGGTGAAGTCACTGT                 | natural antisense      |
| 53753695  | 53755378  | CCGTTGTACACAGGTGAAGTCACTGT                 | natural antisense      |
| 45022683  | 45026169  | CTGAGCCCAAGT.285958                        | intergenic             |
| 78952985  | 78996226  | AACCTGGTTGAATATGGAGTTGATT                  | intronic antisense     |
| 52741846  | 52768575  | ACCTAGTTAGGA.374500                        | intergenic             |
| 99571772  | 99574275  | TCONS_00023546 CTGTGTAAGTGGAGCTGGGGGATGA   | intergenic             |
| 101630808 | 101632221 | ENST00000521535 AAGTTACCCACATTTCTGCCAGCT   | intronic antisense     |
| 103415611 | 103441104 | GAAGGCAGTGTACTGAATAGTACCA                  | intergenic             |
| 44649257  | 44650366  | ENST00000535913 TCGCTGGGAGGCCCTGGGCTCCCCA  | natural antisense      |
| 203043382 | 203044114 | CTTGATAAATATGTAACATTAACAG.                 | intronic antisense     |
| 37049239  | 37063920  | ENST00000423536, CCATGCCTGGAATGACTTTAATAAC | intergenic             |
| 183063535 | 183064929 | AAGGATTTCCACCCCGATTAGCGG                   | bidirectional          |
| 128322880 | 128391724 | GGCTCGCGGGGTGCGGGGAGCCT                    | intergenic             |
| 235791851 | 235797446 | GAAAGTGTTGAAAATTGACATCTAT                  | intergenic             |
| 242629828 | 242633704 | GGCCTGATAGACAAAATACATGAAC                  | intergenic             |
| 67559237  | 67572805  | ENST00000525180, TCTATGTGGCCC.1645332      | intergenic             |
| 69184376  | 69187267  | ENST00000561588 AAAGAACCAAGAGCTGCAAATGTCC  | intergenic             |
| 8086797   | 8182762   | ACTGTTTTCTGAAAACATTGCTTCT                  | bidirectional          |
| 30430393  | 30431977  | TGCACTTAGGTTCTAAAATTATGCT                  | intron sense-overlappi |
| 174203067 | 174220936 | GAGATGAACTTCTTTGGCAGTTAAC                  | intronic antisense     |
| 174203067 | 174220936 | GAGATGAACTTCTTTGGCAGTTAAC                  | intronic antisense     |
| 40378573  | 40383255  | AGAGTGAGCTTGAAGAACGTGTGAC                  | intergenic             |
| 75017245  | 75018926  | TGAGTGAGAGGCCTCAAGTGACCCT                  | intergenic             |
| 73150426  | 73153184  | NM_001145364, NM_AAATAACTTCA.83451         | exon sense-overlappi   |
| 73150426  | 73153184  | NM_001145364, NM_AAATAACTTCA.83451         | exon sense-overlappi   |
| 73150426  | 73153184  | NM_001145364, NM_AAATAACTTCA.83451         | exon sense-overlappi   |
| 129000922 | 129004320 | AAGAAAGGCCAGGCATTTGCATCT                   | intergenic             |
| 127532401 | 127535206 | TTAACTCGAGCACTGATGAAGTCCA                  | intronic antisense     |

|                 |            |                                  |           |           |
|-----------------|------------|----------------------------------|-----------|-----------|
| NM_001204221    | ZNF695     | zinc finger protein 695-         | 247108848 | 247171395 |
| NM_020394       | ZNF695     | zinc finger protein 695-         | 247148624 | 247171395 |
| NM_033213       | ZNF670     | zinc finger protein 670-         | 247197939 | 247242115 |
|                 |            |                                  |           |           |
| NM_001012662    | SLC3A2     | 4F2 cell-surface anti- $\xi$ +   | 62623483  | 62656355  |
| NM_001012664    | SLC3A2     | 4F2 cell-surface anti- $\xi$ +   | 62623483  | 62656355  |
| NM_002394       | SLC3A2     | 4F2 cell-surface anti- $\xi$ +   | 62623483  | 62656355  |
| NM_001185075    | FMR1       | fragile X mental retar- $\xi$ +  | 146993468 | 147032647 |
| NM_001185076    | FMR1       | fragile X mental retar- $\xi$ +  | 146993468 | 147032647 |
| NM_001185081    | FMR1       | fragile X mental retar- $\xi$ +  | 146993468 | 147032647 |
| NM_001185082    | FMR1       | fragile X mental retar- $\xi$ +  | 146993468 | 147032647 |
| NM_002024       | FMR1       | fragile X mental retar- $\xi$ +  | 146993468 | 147032647 |
|                 |            |                                  |           |           |
| NM_001001552    | LEMD1      | LEM domain-contain- $\xi$ -      | 205350505 | 205391214 |
| NM_001199050    | LEMD1      | LEM domain-contain- $\xi$ -      | 205350505 | 205391214 |
| NM_001199051    | LEMD1      | LEM domain-contain- $\xi$ -      | 205350505 | 205391214 |
| NM_001199052    | LEMD1      | LEM domain-contain- $\xi$ -      | 205350505 | 205391214 |
|                 |            |                                  |           |           |
| NM_152522       | ARL6IP6    | ADP-ribosylation fac- $\xi$ +    | 153574406 | 153617767 |
| NM_001194954    | MATR3      | matrin-3 isoform a- $\xi$ +      | 138609440 | 138667366 |
| NM_199189       | MATR3      | matrin-3 isoform a- $\xi$ +      | 138609440 | 138667366 |
| NM_001099289    | SH3RF3     | SH3 domain-contain- $\xi$ +      | 109745996 | 110262207 |
| NM_001190964    | ZMYM2      | zinc finger MYM-tyr- $\xi$ +     | 20532847  | 20665968  |
| NM_001190965    | ZMYM2      | zinc finger MYM-tyr- $\xi$ +     | 20532973  | 20665968  |
| NM_003453       | ZMYM2      | zinc finger MYM-tyr- $\xi$ +     | 20532809  | 20665968  |
| NM_197968       | ZMYM2      | zinc finger MYM-tyr- $\xi$ +     | 20532809  | 20665968  |
|                 |            |                                  |           |           |
| NM_001018054    | LRP8       | low-density lipoprote- $\xi$ -   | 53708040  | 53793821  |
| NM_004631       | LRP8       | low-density lipoprote- $\xi$ -   | 53708040  | 53793821  |
| NM_017522       | LRP8       | low-density lipoprote- $\xi$ -   | 53708040  | 53793821  |
| NM_033300       | LRP8       | low-density lipoprote- $\xi$ -   | 53708040  | 53793821  |
|                 |            |                                  |           |           |
| ENST00000560511 | CHRN4      | cholinergic receptor, - $\xi$ -  | 78923403  | 79012628  |
|                 |            |                                  |           |           |
| NM_152628       | SNX31      | sorting nexin-31 - $\xi$ -       | 101585111 | 101661893 |
|                 |            |                                  |           |           |
| NM_001134771    | SLC12A5    | solute carrier family + $\xi$ +  | 44650328  | 44688789  |
| ENST00000498697 | AC079354.1 | Uncharacterized prot + $\xi$ +   | 202965157 | 203059074 |
|                 |            |                                  |           |           |
| ENST00000512480 | ODZ3       | odz, odd Oz/ten-m h- $\xi$ +     | 183065842 | 183268082 |
|                 |            |                                  |           |           |
|                 |            |                                  |           |           |
| NM_018948       | ERRFI1     | ERBB receptor feedt- $\xi$ -     | 8071778   | 8086393   |
| NM_006585       | CCT8       | T-complex protein 1 - $\xi$ -    | 30428647  | 30446010  |
| NM_031942       | CDCA7      | cell division cycle-as + $\xi$ + | 174219560 | 174233718 |
| NM_145810       | CDCA7      | cell division cycle-as + $\xi$ + | 174219560 | 174233718 |
|                 |            |                                  |           |           |
| NM_001145364    | ABHD11     | abhydrolase domain-- $\xi$ -     | 73150424  | 73153184  |
| NM_148912       | ABHD11     | abhydrolase domain-- $\xi$ -     | 73150426  | 73153184  |
| NM_148913       | ABHD11     | abhydrolase domain-- $\xi$ -     | 73150426  | 73153184  |
|                 |            |                                  |           |           |
| NM_001489       | NR6A1      | nuclear receptor subf- $\xi$ -   | 127284702 | 127533576 |

|                   |                  |                 |                 |                |                  |
|-------------------|------------------|-----------------|-----------------|----------------|------------------|
| 816.707037        | 173.537282       | 9.182768        | 7.737516        | 647.07135      | 559.1773         |
| 816.707037        | 173.537282       | 9.182768        | 7.737516        | 647.07135      | 559.1773         |
| 816.707037        | 173.537282       | 9.182768        | 7.737516        | 647.07135      | 559.1773         |
| 50.726197         | 14.58997         | 5.287984        | 4.063728        | 48.225105      | 33.475605        |
| <b>129.158616</b> | <b>36.204447</b> | <b>6.587783</b> | <b>5.463784</b> | <b>172.625</b> | <b>199.64175</b> |
| 696.195195        | 161.362683       | 9.010984        | 7.662786        | 612.79803      | 536.88135        |
| 696.195195        | 161.362683       | 9.010984        | 7.662786        | 612.79803      | 536.88135        |
| 696.195195        | 161.362683       | 9.010984        | 7.662786        | 612.79803      | 536.88135        |
| 19.392102         | 7.921922         | 3.958802        | 2.876849        | 21.935337      | 17.605732        |
| 19.392102         | 7.921922         | 3.958802        | 2.876849        | 21.935337      | 17.605732        |
| 19.392102         | 7.921922         | 3.958802        | 2.876849        | 21.935337      | 17.605732        |
| 19.392102         | 7.921922         | 3.958802        | 2.876849        | 21.935337      | 17.605732        |
| 19.392102         | 7.921922         | 3.958802        | 2.876849        | 21.935337      | 17.605732        |
| 143.2682          | 19.623985        | 6.73303         | 4.454283        | 162.76797      | 161.75323        |
| 682.52728         | 124.497272       | 8.86292         | 7.286214        | 497.8565       | 299.14673        |
| 39.176129         | 10.054405        | 4.817742        | 3.406211        | 58.603012      | 70.70001         |
| 45.918514         | 14.60086         | 5.098123        | 4.091549        | 58.336323      | 43.036213        |
| 55.124343         | 13.712261        | 5.37494         | 3.860875        | 65.06197       | 84.8882          |
| 74.172567         | 14.60446         | 5.626328        | 4.020823        | 44.15091       | 14.308191        |
| 74.172567         | 14.60446         | 5.626328        | 4.020823        | 44.15091       | 14.308191        |
| 74.172567         | 14.60446         | 5.626328        | 4.020823        | 44.15091       | 14.308191        |
| 74.172567         | 14.60446         | 5.626328        | 4.020823        | 44.15091       | 14.308191        |
| 152.086757        | 33.768749        | 6.822618        | 5.205441        | 179.00868      | 152.73381        |
| 798.41805         | 197.61759        | 9.222907        | 7.957666        | 935.887        | 628.7339         |
| 69.548866         | 6.509752         | 5.547249        | 2.739745        | 35.943745      | 49.055275        |
| 69.548866         | 6.509752         | 5.547249        | 2.739745        | 35.943745      | 49.055275        |
| 268.63044         | 69.082358        | 7.470445        | 6.21457         | 189.38176      | 138.7771         |
| 42.839822         | 13.091207        | 5.060587        | 3.912671        | 41.7199        | 23.938972        |
| 42.839822         | 13.091207        | 5.060587        | 3.912671        | 41.7199        | 23.938972        |
| 42.839822         | 13.091207        | 5.060587        | 3.912671        | 41.7199        | 23.938972        |
| 42.839822         | 13.091207        | 5.060587        | 3.912671        | 41.7199        | 23.938972        |
| 39.552334         | 11.67367         | 4.899251        | 3.788889        | 36.246025      | 28.197426        |
| 24.302894         | 6.459921         | 4.269546        | 2.814869        | 27.93751       | 17.878288        |
| 24.302894         | 6.459921         | 4.269546        | 2.814869        | 27.93751       | 17.878288        |
| 24.302894         | 6.459921         | 4.269546        | 2.814869        | 27.93751       | 17.878288        |
| 24.302894         | 6.459921         | 4.269546        | 2.814869        | 27.93751       | 17.878288        |
| 508.8478          | 114.067294       | 8.528586        | 7.141313        | 629.6647       | 739.061          |
| 69.761771         | 9.11744          | 5.048356        | 3.051096        | 141.33012      | 162.4149         |
| 185.077872        | 47.57882         | 7.133852        | 5.766911        | 171.7685       | 110.5485         |
| 131.039897        | 30.897196        | 6.66049         | 5.257937        | 151.68886      | 115.17516        |
| 293.793497        | 95.548768        | 7.761786        | 6.761757        | 336.24338      | 343.48126        |
| 172.968924        | 5.364717         | 7.025074        | 2.560105        | 225.45955      | 187.4608         |
| 52.900191         | 16.790312        | 5.344596        | 4.218348        | 44.35446       | 35.48451         |
| 291.599293        | 33.577556        | 7.713934        | 5.169604        | 393.02618      | 452.3835         |
| 26091.43367       | 5426.811783      | 14.197728       | 12.782923       | 29074.523      | 36506.35         |
| 671.60353         | 165.728181       | 8.735759        | 7.612702        | 943.1596       | 1317.7736        |
| 813.92628         | 219.007263       | 9.261068        | 8.142081        | 763.45374      | 798.0694         |
| 909.368173        | 149.358944       | 9.348424        | 7.286541        | 900.1693       | 492.0172         |
| 949.863848        | 228.711015       | 9.492099        | 8.083668        | 997.18646      | 901.64386        |
| 562.378703        | 165.000695       | 8.710196        | 7.694637        | 543.755        | 692.368          |
| 630.354292        | 82.197743        | 8.642082        | 6.648178        | 805.7482       | 775.53375        |
| 78.874964         | 27.317252        | 5.879744        | 4.822397        | 103.84826      | 95.9337          |
| 40.256432         | 9.720112         | 4.950761        | 3.38004         | 37.487537      | 22.345304        |
| 84.66214          | 16.51056         | 5.932849        | 4.278254        | 101.36038      | 150.40433        |
| 84.66214          | 16.51056         | 5.932849        | 4.278254        | 101.36038      | 150.40433        |
| 118.633046        | 27.192449        | 6.427512        | 5.005281        | 83.894554      | 77.72819         |
| 28.75761          | 8.72641          | 4.43405         | 3.373737        | 43.48235       | 29.342306        |
| 555.681942        | 152.70552        | 8.722314        | 7.339557        | 588.32166      | 581.96466        |
| 555.681942        | 152.70552        | 8.722314        | 7.339557        | 588.32166      | 581.96466        |
| 555.681942        | 152.70552        | 8.722314        | 7.339557        | 588.32166      | 581.96466        |
| 2047.9777         | 384.798335       | 10.565602       | 8.854321        | 1864.4635      | 1650.585         |
| 36.517909         | 11.027871        | 4.829067        | 3.431378        | 50.213932      | 44.42035         |

|                 |                  |                 |                   |                 |                 |
|-----------------|------------------|-----------------|-------------------|-----------------|-----------------|
| 506.49847       | 637.0344         | 1281.4468       | 1269.0139         | 171.5191        | 98.71382        |
| 506.49847       | 637.0344         | 1281.4468       | 1269.0139         | 171.5191        | 98.71382        |
| 506.49847       | 637.0344         | 1281.4468       | 1269.0139         | 171.5191        | 98.71382        |
| 33.43718        | 65.21983         | 57.66716        | 66.3323           | 15.059291       | 5.748883        |
| <b>89.61505</b> | <b>119.61078</b> | <b>78.89911</b> | <b>114.560005</b> | <b>34.07279</b> | <b>23.44298</b> |
| 594.9506        | 516.05096        | 961.513         | 954.97723         | 142.14587       | 133.31451       |
| 594.9506        | 516.05096        | 961.513         | 954.97723         | 142.14587       | 133.31451       |
| 594.9506        | 516.05096        | 961.513         | 954.97723         | 142.14587       | 133.31451       |
| 23.124285       | 18.583189        | 14.586199       | 20.51787          | 10.74159        | 4.9999995       |
| 23.124285       | 18.583189        | 14.586199       | 20.51787          | 10.74159        | 4.9999995       |
| 23.124285       | 18.583189        | 14.586199       | 20.51787          | 10.74159        | 4.9999995       |
| 23.124285       | 18.583189        | 14.586199       | 20.51787          | 10.74159        | 4.9999995       |
| 23.124285       | 18.583189        | 14.586199       | 20.51787          | 10.74159        | 4.9999995       |
| 218.7134        | 127.31769        | 69.56811        | 119.4888          | 19.13899        | 7.0374846       |
| 671.7106        | 400.84805        | 1180.4546       | 1045.1472         | 107.3909        | 93.48283        |
| 29.389215       | 26.004267        | 21.980158       | 28.380114         | 15.090082       | 4.9999995       |
| 75.60868        | 25.105099        | 35.376762       | 38.04801          | 10.621881       | 7.8643823       |
| 39.06527        | 37.39281         | 43.660637       | 60.67717          | 13.171989       | 5.0009046       |
| 78.57452        | 107.85094        | 78.74001        | 121.41083         | 9.360028        | 7.3912773       |
| 78.57452        | 107.85094        | 78.74001        | 121.41083         | 9.360028        | 7.3912773       |
| 78.57452        | 107.85094        | 78.74001        | 121.41083         | 9.360028        | 7.3912773       |
| 78.57452        | 107.85094        | 78.74001        | 121.41083         | 9.360028        | 7.3912773       |
| 196.08191       | 181.40097        | 64.8918         | 138.40337         | 43.943233       | 23.625986       |
| 1091.8666       | 640.3271         | 676.5818        | 817.1119          | 202.01132       | 169.98808       |
| 21.78812        | 107.69773        | 83.997826       | 118.8105          | 4.9999995       | 4.9999995       |
| 21.78812        | 107.69773        | 83.997826       | 118.8105          | 4.9999995       | 4.9999995       |
| 212.79012       | 567.77167        | 106.35649       | 396.7055          | 54.58813        | 82.91065        |
| 54.753723       | 46.356934        | 37.75202        | 52.517384         | 9.5597          | 6.3394456       |
| 54.753723       | 46.356934        | 37.75202        | 52.517384         | 9.5597          | 6.3394456       |
| 54.753723       | 46.356934        | 37.75202        | 52.517384         | 9.5597          | 6.3394456       |
| 54.753723       | 46.356934        | 37.75202        | 52.517384         | 9.5597          | 6.3394456       |
| 35.841743       | 69.84728         | 20.5003         | 46.681232         | 10.937611       | 7.3365235       |
| 25.582705       | 35.592434        | 20.967028       | 17.859402         | 4.9999995       | 4.9999995       |
| 25.582705       | 35.592434        | 20.967028       | 17.859402         | 4.9999995       | 4.9999995       |
| 25.582705       | 35.592434        | 20.967028       | 17.859402         | 4.9999995       | 4.9999995       |
| 25.582705       | 35.592434        | 20.967028       | 17.859402         | 4.9999995       | 4.9999995       |
| 25.582705       | 35.592434        | 20.967028       | 17.859402         | 4.9999995       | 4.9999995       |
| 499.48523       | 527.57697        | 242.04985       | 415.24905         | 101.10709       | 122.39327       |
| 21.649734       | 4.9999995        | 60.659325       | 27.516546         | 9.807784        | 5.0806937       |
| 223.52727       | 235.83035        | 140.30331       | 228.4893          | 53.990883       | 31.823553       |
| 119.14023       | 168.40543        | 89.868355       | 141.96135         | 27.298876       | 32.397057       |
| 202.73846       | 157.4028         | 409.01343       | 313.88165         | 112.508224      | 57.769928       |
| 243.6625        | 115.676575       | 122.1997        | 143.35442         | 4.9999995       | 7.1883025       |
| 65.00854        | 79.57936         | 34.210976       | 58.763298         | 6.870341        | 17.754656       |
| 343.53415       | 183.57144        | 161.54674       | 215.53375         | 45.403683       | 70.62696        |
| 16208.401       | 14726.477        | 28813.15        | 31219.701         | 5124.52         | 6240.928        |
| 347.96136       | 189.19832        | 722.1658        | 509.3625          | 209.00859       | 135.36969       |
| 678.4072        | 1070.4955        | 670.8852        | 902.24664         | 237.69272       | 210.33847       |
| 1305.008        | 1179.531         | 528.66754       | 1050.816          | 157.43298       | 35.482105       |
| 1039.3778       | 910.1075         | 771.70447       | 1079.163          | 227.1396        | 138.64488       |
| 376.28082       | 424.1402         | 627.0052        | 710.723           | 143.1407        | 150.60808       |
| 722.692         | 95.4579          | 750.0779        | 632.616           | 81.821724       | 117.38688       |
| 97.32485        | 76.37003         | 34.945717       | 64.827225         | 39.11082        | 37.09494        |
| 52.368748       | 53.541695        | 26.801151       | 48.994156         | 8.486335        | 4.9999995       |
| 48.24543        | 86.86746         | 41.8368         | 79.25844          | 21.191414       | 15.332101       |
| 48.24543        | 86.86746         | 41.8368         | 79.25844          | 21.191414       | 15.332101       |
| 159.35754       | 211.09872        | 64.77388        | 114.94539         | 24.19035        | 13.022039       |
| 39.518837       | 29.245485        | 15.77412        | 15.182559         | 11.111439       | 7.08374         |
| 424.76953       | 583.76166        | 491.53934       | 663.7348          | 125.938774      | 56.2379         |
| 424.76953       | 583.76166        | 491.53934       | 663.7348          | 125.938774      | 56.2379         |
| 424.76953       | 583.76166        | 491.53934       | 663.7348          | 125.938774      | 56.2379         |
| 1957.849        | 2595.979         | 1714.6235       | 2504.3662         | 250.8782        | 249.74246       |
| 31.884237       | 27.603092        | 28.783342       | 36.202503         | 12.65942        | 4.9999995       |

|                  |                 |                  |                 |                  |                 |
|------------------|-----------------|------------------|-----------------|------------------|-----------------|
| 271.55383        | 184.43912       | 169.67583        | 145.32199       | 8.865744         | 8.816502        |
| 271.55383        | 184.43912       | 169.67583        | 145.32199       | 8.865744         | 8.816502        |
| 271.55383        | 184.43912       | 169.67583        | 145.32199       | 8.865744         | 8.816502        |
| 11.619431        | 20.954058       | 16.62913         | 17.52903        | 5.131353         | 4.9861116       |
| <b>37.805515</b> | <b>33.26478</b> | <b>52.134308</b> | <b>36.50631</b> | <b>6.9790344</b> | <b>7.392539</b> |
| 181.18706        | 125.86021       | 227.15147        | 158.51698       | 8.788559         | 8.760189        |
| 181.18706        | 125.86021       | 227.15147        | 158.51698       | 8.788559         | 8.760189        |
| 181.18706        | 125.86021       | 227.15147        | 158.51698       | 8.788559         | 8.760189        |
| 16.789942        | 4.9999995       | 4.9999995        | 4.9999995       | 3.9932153        | 4.137368        |
| 16.789942        | 4.9999995       | 4.9999995        | 4.9999995       | 3.9932153        | 4.137368        |
| 16.789942        | 4.9999995       | 4.9999995        | 4.9999995       | 3.9932153        | 4.137368        |
| 16.789942        | 4.9999995       | 4.9999995        | 4.9999995       | 3.9932153        | 4.137368        |
| 16.789942        | 4.9999995       | 4.9999995        | 4.9999995       | 3.9932153        | 4.137368        |
| 22.75569         | 17.342936       | 32.827625        | 18.641186       | 6.890214         | 7.095615        |
| 141.05917        | 113.57994       | 165.99118        | 125.479614      | 8.479397         | 7.9522905       |
| 11.38789         | 5.6041284       | 11.598061        | 11.646269       | 5.411232         | 5.965311        |
| 13.521501        | 19.66866        | 20.547295        | 15.381441       | 5.404421         | 5.3148355       |
| 27.56899         | 14.062891       | 14.128131        | 8.340659        | 5.56461          | 6.210959        |
| 23.475801        | 23.52472        | 12.68577         | 11.189161       | 5.007328         | 3.8650498       |
| 23.475801        | 23.52472        | 12.68577         | 11.189161       | 5.007328         | 3.8650498       |
| 23.475801        | 23.52472        | 12.68577         | 11.189161       | 5.007328         | 3.8650498       |
| 23.475801        | 23.52472        | 12.68577         | 11.189161       | 5.007328         | 3.8650498       |
| 69.66627         | 27.588425       | 19.738668        | 18.04991        | 7.0292754        | 7.0172696       |
| 151.54819        | 185.38618       | 296.3513         | 180.42047       | 9.401504         | 8.979126        |
| 4.9999995        | 4.9999995       | 11.623892        | 7.4346223       | 4.704103         | 5.4854183       |
| 4.9999995        | 4.9999995       | 11.623892        | 7.4346223       | 4.704103         | 5.4854183       |
| 37.895287        | 145.7041        | 20.29875         | 73.09723        | 7.1141315        | 6.887596        |
| 16.783693        | 17.120913       | 11.28691         | 17.45658        | 4.919989         | 4.538577        |
| 16.783693        | 17.120913       | 11.28691         | 17.45658        | 4.919989         | 4.538577        |
| 16.783693        | 17.120913       | 11.28691         | 17.45658        | 4.919989         | 4.538577        |
| 16.783693        | 17.120913       | 11.28691         | 17.45658        | 4.919989         | 4.538577        |
| 8.273516         | 14.510448       | 17.024668        | 11.959251       | 4.7156153        | 4.76087         |
| 7.0154014        | 6.0013404       | 9.358593         | 6.384194        | 4.3509693        | 4.158482        |
| 7.0154014        | 6.0013404       | 9.358593         | 6.384194        | 4.3509693        | 4.158482        |
| 7.0154014        | 6.0013404       | 9.358593         | 6.384194        | 4.3509693        | 4.158482        |
| 7.0154014        | 6.0013404       | 9.358593         | 6.384194        | 4.3509693        | 4.158482        |
| 66.94008         | 165.30501       | 121.539986       | 107.11833       | 8.824776         | 9.204719        |
| 24.816164        | 4.9999995       | 4.9999995        | 4.9999995       | 6.691802         | 7.100487        |
| 69.68085         | 22.888197       | 71.08402         | 36.00542        | 6.9719443        | 6.5682406       |
| 39.49484         | 26.710447       | 30.437807        | 29.044147       | 6.7888656        | 6.6255684       |
| 197.61926        | 56.334175       | 79.6353          | 69.42572        | 7.9391212        | 8.142352        |
| 4.9999995        | 4.9999995       | 4.9999995        | 4.9999995       | 7.3681536        | 7.3098707       |
| 12.464051        | 33.670815       | 11.755082        | 18.22693        | 5.015324         | 5.063548        |
| 22.512053        | 30.585062       | 15.50941         | 16.828169       | 8.161489         | 8.5139675       |
| 3098.444         | 5478.6484       | 7605.865         | 5012.4653       | 14.384752        | 14.806293       |
| 275.72644        | 84.080376       | 172.86879        | 117.3152        | 9.413595         | 10.004086       |
| 236.00291        | 241.71207       | 195.28372        | 193.01369       | 9.115931         | 9.307951        |
| 293.65356        | 79.99764        | 201.1154         | 128.47198       | 9.341197         | 8.629734        |
| 348.74222        | 122.95122       | 340.82437        | 193.9638        | 9.491922         | 9.482655        |
| 113.08011        | 177.00948       | 234.39702        | 171.76878       | 8.603131         | 9.110519        |
| 43.639442        | 95.66652        | 85.45069         | 69.2212         | 9.19311          | 9.269911        |
| 49.087208        | 11.386268       | 13.828319        | 13.39596        | 6.2512703        | 6.36874         |
| 12.28965         | 15.13874        | 7.170188         | 10.23576        | 4.7632113        | 4.44475         |
| 21.486553        | 10.827091       | 19.475693        | 10.75051        | 6.2149935        | 6.997098        |
| 21.486553        | 10.827091       | 19.475693        | 10.75051        | 6.2149935        | 6.997098        |
| 20.054941        | 35.26596        | 36.876625        | 33.74478        | 5.9390764        | 6.091457        |
| 8.941907         | 12.37382        | 5.1232853        | 7.7242684       | 4.98413          | 4.811493        |
| 213.22006        | 61.691223       | 309.5748         | 149.57036       | 8.72662          | 8.875066        |
| 213.22006        | 61.691223       | 309.5748         | 149.57036       | 8.72662          | 8.875066        |
| 213.22006        | 61.691223       | 309.5748         | 149.57036       | 8.72662          | 8.875066        |
| 236.62776        | 692.928         | 430.97977        | 447.63382       | 10.383313        | 10.293598       |
| 24.059645        | 9.384424        | 8.854726         | 6.2090087       | 5.1868286        | 5.355707        |

|                |                  |                 |                  |                 |                  |
|----------------|------------------|-----------------|------------------|-----------------|------------------|
| 8.6294         | 9.00169          | 10.051112       | 9.732162         | 7.669079        | 7.4807715        |
| 8.6294         | 9.00169          | 10.051112       | 9.732162         | 7.669079        | 7.4807715        |
| 8.6294         | 9.00169          | 10.051112       | 9.732162         | 7.669079        | 7.4807715        |
| 4.750881       | 5.655074         | 5.6615515       | 5.5429316        | 4.14586         | 3.2630506        |
| <b>6.16616</b> | <b>6.5722437</b> | <b>6.098575</b> | <b>6.3181477</b> | <b>5.322156</b> | <b>5.3804464</b> |
| 8.851934       | 8.692            | 9.657539        | 9.315685         | 7.38026         | 7.9070816        |
| 8.851934       | 8.692            | 9.657539        | 9.315685         | 7.38026         | 7.9070816        |
| 8.851934       | 8.692            | 9.657539        | 9.315685         | 7.38026         | 7.9070816        |
| 4.2223215      | 3.6814904        | 3.7943544       | 3.9240603        | 3.6494975       | 2.4279919        |
| 4.2223215      | 3.6814904        | 3.7943544       | 3.9240603        | 3.6494975       | 2.4279919        |
| 4.2223215      | 3.6814904        | 3.7943544       | 3.9240603        | 3.6494975       | 2.4279919        |
| 4.2223215      | 3.6814904        | 3.7943544       | 3.9240603        | 3.6494975       | 2.4279919        |
| 4.2223215      | 3.6814904        | 3.7943544       | 3.9240603        | 3.6494975       | 2.4279919        |
| 7.4507546      | 6.662826         | 5.9182405       | 6.3805285        | 4.4951386       | 3.5783641        |
| 9.026353       | 8.332553         | 9.941084        | 9.445841         | 6.9828115       | 7.3985543        |
| 4.5695276      | 4.232088         | 4.355845        | 4.3724475        | 4.1492453       | 2.4279919        |
| 5.9232073      | 4.172698         | 4.992227        | 4.7813497        | 3.6352596       | 3.738757         |
| 4.972652       | 4.794572         | 5.289053        | 5.4177947        | 3.9460435       | 3.046911         |
| 5.98077        | 6.406177         | 6.0947323       | 6.403911         | 3.4395602       | 3.6462574        |
| 5.98077        | 6.406177         | 6.0947323       | 6.403911         | 3.4395602       | 3.6462574        |
| 5.98077        | 6.406177         | 6.0947323       | 6.403911         | 3.4395602       | 3.6462574        |
| 5.98077        | 6.406177         | 6.0947323       | 6.403911         | 3.4395602       | 3.6462574        |
| 7.2993307      | 7.1796627        | 5.8233943       | 6.586777         | 5.690164        | 5.393093         |
| 9.717943       | 9.010224         | 9.134651        | 9.093991         | 7.9051075       | 8.255904         |
| 4.1291914      | 6.403911         | 6.1881447       | 6.3727245        | 2.3467326       | 2.4279919        |
| 4.1291914      | 6.403911         | 6.1881447       | 6.3727245        | 2.3467326       | 2.4279919        |
| 7.417124       | 8.826271         | 6.5174766       | 8.060068         | 6.005711        | 7.226442         |
| 5.4603024      | 5.132815         | 5.086352        | 5.225484         | 3.4756367       | 3.4159937        |
| 5.4603024      | 5.132815         | 5.086352        | 5.225484         | 3.4756367       | 3.4159937        |
| 5.4603024      | 5.132815         | 5.086352        | 5.225484         | 3.4756367       | 3.4159937        |
| 5.4603024      | 5.132815         | 5.086352        | 5.225484         | 3.4756367       | 3.4159937        |
| 4.846171       | 5.7595925        | 4.254867        | 5.0583897        | 3.678304        | 3.6350408        |
| 4.3659554      | 4.718999         | 4.2855873       | 3.7372835        | 2.3467326       | 2.4279919        |
| 4.3659554      | 4.718999         | 4.2855873       | 3.7372835        | 2.3467326       | 2.4279919        |
| 4.3659554      | 4.718999         | 4.2855873       | 3.7372835        | 2.3467326       | 2.4279919        |
| 4.3659554      | 4.718999         | 4.2855873       | 3.7372835        | 2.3467326       | 2.4279919        |
| 8.6130705      | 8.72496          | 7.676522        | 8.127468         | 6.8944926       | 7.783832         |
| 4.1176867      | 2.3221264        | 5.732545        | 4.3254886        | 3.5187483       | 3.0749142        |
| 7.4829626      | 7.5753284        | 6.911847        | 7.2927866        | 5.9924417       | 5.829446         |
| 6.576539       | 7.06807          | 6.2822256       | 6.6216736        | 5.0079174       | 5.8572493        |
| 7.351408       | 6.9764214        | 8.4162855       | 7.7451296        | 7.050524        | 6.704183         |
| 7.6002307      | 6.520251         | 6.7122445       | 6.6396914        | 2.3467326       | 3.6077442        |
| 5.716176       | 5.953912         | 4.945983        | 5.3726315        | 2.9779243       | 4.9725666        |
| 8.086385       | 7.1965575        | 7.108122        | 7.2170854        | 5.7347116       | 6.9892874        |
| 13.705409      | 13.49674         | 14.450358       | 14.342814        | 12.638865       | 13.501165        |
| 8.103829       | 7.2424264        | 9.231528        | 8.419092         | 7.9522905       | 7.930527         |
| 9.045032       | 9.744242         | 9.121104        | 9.232148         | 8.144797        | 8.576431         |
| 9.9908         | 9.884054         | 8.79155         | 9.453207         | 7.5420322       | 5.9904175        |
| 9.645759       | 9.510329         | 9.331725        | 9.490204         | 8.079763        | 7.9627295        |
| 8.20824        | 8.420494         | 9.024453        | 8.894337         | 7.391492        | 8.087527         |
| 9.145623       | 6.225221         | 9.291616        | 8.72701          | 6.578766        | 7.724579         |
| 6.2827773      | 5.8923397        | 4.97458         | 5.5087557        | 5.5217867       | 6.0602655        |
| 5.3929477      | 5.3539352        | 4.6233177       | 5.126404         | 3.2950459       | 2.4279919        |
| 5.275046       | 6.0863614        | 5.2280498       | 5.795545         | 4.6443276       | 4.7539115        |
| 5.275046       | 6.0863614        | 5.2280498       | 5.795545         | 4.6443276       | 4.7539115        |
| 6.9811416      | 7.4099135        | 5.8207946       | 6.3226867        | 4.83883         | 4.5006766        |
| 4.9894166      | 4.4136496        | 3.9031775       | 3.5024354        | 3.7041554       | 3.5856655        |
| 8.3844185      | 8.868647         | 8.681088        | 8.798042         | 7.209708        | 6.666758         |
| 8.3844185      | 8.868647         | 8.681088        | 8.798042         | 7.209708        | 6.666758         |
| 8.3844185      | 8.868647         | 8.681088        | 8.798042         | 7.209708        | 6.666758         |
| 10.576313      | 11.000381        | 10.452557       | 10.687448        | 8.229517        | 8.821267         |
| 4.6830854      | 4.3235664        | 4.713121        | 4.7120953        | 3.889101        | 2.4279919        |

|           |           |           |           |
|-----------|-----------|-----------|-----------|
| 8.033613  | 7.9186974 | 7.6462    | 7.676734  |
| 8.033613  | 7.9186974 | 7.6462    | 7.676734  |
| 8.033613  | 7.9186974 | 7.6462    | 7.676734  |
| 3.6318192 | 4.5560927 | 4.3310704 | 4.4544735 |
| 5.242817  | 5.2697606 | 5.974097  | 5.593424  |
| 7.4534135 | 7.340494  | 8.085354  | 7.810115  |
| 7.4534135 | 7.340494  | 8.085354  | 7.810115  |
| 7.4534135 | 7.340494  | 8.085354  | 7.810115  |
| 4.1281595 | 2.3408759 | 2.3618152 | 2.352752  |
| 4.1281595 | 2.3408759 | 2.3618152 | 2.352752  |
| 4.1281595 | 2.3408759 | 2.3618152 | 2.352752  |
| 4.1281595 | 2.3408759 | 2.3618152 | 2.352752  |
| 4.1281595 | 2.3408759 | 2.3618152 | 2.352752  |
| 4.5395336 | 4.26018   | 5.306449  | 4.5460353 |
| 7.096438  | 7.175758  | 7.609906  | 7.453815  |
| 3.60552   | 2.6047366 | 3.8099597 | 3.8398104 |
| 3.8319757 | 4.453799  | 4.6262693 | 4.2632356 |
| 4.806872  | 3.941811  | 4.092065  | 3.3315463 |
| 4.5822473 | 4.737487  | 3.9410737 | 3.7783108 |
| 4.5822473 | 4.737487  | 3.9410737 | 3.7783108 |
| 4.5822473 | 4.737487  | 3.9410737 | 3.7783108 |
| 4.5822473 | 4.737487  | 3.9410737 | 3.7783108 |
| 6.0968275 | 4.987355  | 4.566816  | 4.498391  |
| 7.1924505 | 7.9274664 | 8.460256  | 8.004814  |
| 2.350709  | 2.3408759 | 3.8129427 | 3.159215  |
| 2.350709  | 2.3408759 | 3.8129427 | 3.159215  |
| 5.2451262 | 7.5612764 | 4.6084595 | 6.6404076 |
| 4.1275835 | 4.2383866 | 3.7705467 | 4.4478803 |
| 4.1275835 | 4.2383866 | 3.7705467 | 4.4478803 |
| 4.1275835 | 4.2383866 | 3.7705467 | 4.4478803 |
| 4.1275835 | 4.2383866 | 3.7705467 | 4.4478803 |
| 3.179149  | 3.994277  | 4.3654075 | 3.881157  |
| 2.973409  | 2.6928782 | 3.512324  | 2.9358792 |
| 2.973409  | 2.6928782 | 3.512324  | 2.9358792 |
| 2.973409  | 2.6928782 | 3.512324  | 2.9358792 |
| 2.973409  | 2.6928782 | 3.512324  | 2.9358792 |
| 6.0446863 | 7.741766  | 7.172818  | 7.2102838 |
| 4.65747   | 2.3408759 | 2.3618152 | 2.352752  |
| 6.0970135 | 4.692999  | 6.416201  | 5.573363  |
| 5.3025317 | 4.9352064 | 5.2037377 | 5.2409825 |
| 7.577301  | 6.1009207 | 6.5737085 | 6.563906  |
| 2.350709  | 2.3408759 | 2.3618152 | 2.352752  |
| 3.7229505 | 5.29266   | 3.8302543 | 4.5137343 |
| 4.524444  | 5.144755  | 4.2267237 | 4.397705  |
| 11.567577 | 12.897419 | 13.197399 | 12.895115 |
| 8.053862  | 6.721661  | 7.673363  | 7.344508  |
| 7.829624  | 8.338986  | 7.855874  | 8.106773  |
| 8.1440735 | 6.647506  | 7.90175   | 7.4934654 |
| 8.391739  | 7.304121  | 8.649779  | 8.113877  |
| 6.784023  | 7.848084  | 8.127468  | 7.9292307 |
| 5.4444838 | 6.911137  | 6.6707797 | 6.5593195 |
| 5.616732  | 3.619529  | 4.061465  | 4.054602  |
| 3.7056875 | 4.060231  | 3.1436143 | 3.6476676 |
| 4.460566  | 3.5432389 | 4.548326  | 3.7191558 |
| 4.460566  | 3.5432389 | 4.548326  | 3.7191558 |
| 4.3694506 | 5.3709407 | 5.4783583 | 5.4734282 |
| 3.2799807 | 3.7454367 | 2.7081296 | 3.2190535 |
| 7.682559  | 6.243641  | 8.518262  | 7.716412  |
| 7.682559  | 6.243641  | 8.518262  | 7.716412  |
| 7.682559  | 6.243641  | 8.518262  | 7.716412  |
| 7.833492  | 9.902287  | 8.987645  | 9.351719  |
| 4.614075  | 3.3287625 | 3.4342847 | 2.8940525 |



|                      |                    |                   |                  |           |                  |
|----------------------|--------------------|-------------------|------------------|-----------|------------------|
| ASHGA5P017159        | 0.01520177         | 0.075446109       | 2.6347925        | up        | noncoding        |
| ASHGA5P038657        | 0.026565035        | 0.101808156       | 5.1135499        | up        | noncoding        |
| ASHGA5P032483        | 0.005900029        | 0.048956663       | 2.1346575        | up        | noncoding        |
| ASHGA5P038838        | 0.000828618        | 0.019333235       | 2.7711026        | up        | noncoding        |
| ASHGA5P026915        | 0.001699714        | 0.027620998       | 2.3016162        | up        | noncoding        |
| ASHGA5P026915        | 0.001699714        | 0.027620998       | 2.3016162        | up        | noncoding        |
| ASHGA5P026915        | 0.001699714        | 0.027620998       | 2.3016162        | up        | noncoding        |
| ASHGA5P026915        | 0.001699714        | 0.027620998       | 2.3016162        | up        | noncoding        |
| ASHGA5P026915        | 0.001699714        | 0.027620998       | 2.3016162        | up        | noncoding        |
| ASHGA5P026915        | 0.001699714        | 0.027620998       | 2.3016162        | up        | noncoding        |
| ASHGA5P031668        | 0.001151068        | 0.022812819       | 2.462606         | up        | noncoding        |
| ASHGA5P032134        | 0.015293734        | 0.075720608       | 2.0894942        | up        | noncoding        |
| ASHGA5P047634        | 0.006701           | 0.051962277       | 2.0412269        | up        | noncoding        |
| ASHGA5P046199        | 0.0007151          | 0.01793864        | 3.7714179        | up        | noncoding        |
| ASHGA5P017370        | 0.021683151        | 0.090884093       | 2.2897541        | up        | noncoding        |
| ASHGA5P017370        | 0.021683151        | 0.090884093       | 2.2897541        | up        | noncoding        |
| ASHGA5P017370        | 0.021683151        | 0.090884093       | 2.2897541        | up        | noncoding        |
| ASHGA5P017370        | 0.021683151        | 0.090884093       | 2.2897541        | up        | noncoding        |
| ASHGA5P014992        | 0.044795277        | 0.135994806       | 3.3783872        | up        | noncoding        |
| ASHGA5P000271        | 0.011766668        | 0.066715537       | 2.4473843        | up        | noncoding        |
| ASHGA5P054769        | 0.028117182        | 0.104710173       | 2.3004383        | up        | noncoding        |
| ASHGA5P030988        | 2.91541E-05        | 0.005447654       | 2.2791799        | up        | noncoding        |
| ASHGA5P027352        | 0.012207316        | 0.067658161       | 2.4657878        | up        | noncoding        |
| ASHGA5P039087        | 0.02437846         | 0.09688833        | 2.4167738        | up        | noncoding        |
| ASHGA5P038017        | 0.000393051        | 0.014144117       | 2.4924897        | up        | noncoding        |
| ASHGA5P029242        | 0.024431281        | 0.096991067       | 2.361175         | up        | noncoding        |
| ASHGA5P057023        | 0.000483715        | 0.015384974       | 5.9412375        | up        | noncoding        |
| ASHGA5P029551        | 6.02919E-05        | 0.007803818       | 4.4538387        | up        | noncoding        |
| ASHGA5P019000        | 2.48781E-05        | 0.005188131       | 3.3895           | up        | noncoding        |
| ASHGA5P019000        | 2.48781E-05        | 0.005188131       | 3.3895           | up        | noncoding        |
| ASHGA5P019000        | 2.48781E-05        | 0.005188131       | 3.3895           | up        | noncoding        |
| ASHGA5P019000        | 2.48781E-05        | 0.005188131       | 3.3895           | up        | noncoding        |
| ASHGA5P019000        | 2.48781E-05        | 0.005188131       | 3.3895           | up        | noncoding        |
| ASHGA5P019000        | 2.48781E-05        | 0.005188131       | 3.3895           | up        | noncoding        |
| ASHGA5P019000        | 2.48781E-05        | 0.005188131       | 3.3895           | up        | noncoding        |
| ASHGA5P014166        | 0.028722461        | 0.105733109       | 2.0300714        | up        | noncoding        |
| ASHGA5P033226        | 0.032718752        | 0.113900491       | 2.3884481        | up        | noncoding        |
| ASHGA5P034452        | 0.035466338        | 0.119224479       | 2.0893114        | up        | noncoding        |
| ASHGA5P044348        | 0.008311933        | 0.056954491       | 4.7109111        | up        | noncoding        |
| ASHGA5P058434        | 1.80946E-05        | 0.004674623       | 2.5516587        | up        | noncoding        |
| ASHGA5P058434        | 1.80946E-05        | 0.004674623       | 2.5516587        | up        | noncoding        |
| ASHGA5P034071        | 0.011874396        | 0.066970246       | 3.3624137        | up        | noncoding        |
| ASHGA5P030902        | 0.002426679        | 0.032019471       | 2.5359237        | up        | noncoding        |
| ASHGA5P034904        | 0.026381124        | 0.101270986       | 2.1545402        | up        | noncoding        |
| ASHGA5P038329        | 0.007447634        | 0.054185848       | 2.0428356        | up        | noncoding        |
| ASHGA5P047581        | 0.000192978        | 0.01146874        | 5.4689966        | up        | noncoding        |
| ASHGA5P056349        | 0.000274116        | 0.012323835       | 4.1561125        | up        | noncoding        |
| ASHGA5P046546        | 0.000338719        | 0.013255256       | 2.4974954        | up        | noncoding        |
| ASHGA5P046546        | 0.000338719        | 0.013255256       | 2.4974954        | up        | noncoding        |
| ASHGA5P027636        | 1.61412E-05        | 0.004434727       | 4.3391317        | up        | noncoding        |
| ASHGA5P044539        | 0.011456325        | 0.065908731       | 2.0109594        | up        | noncoding        |
| ASHGA5P025486        | 0.02784078         | 0.104306505       | 2.0075714        | up        | noncoding        |
| ASHGA5P025486        | 0.02784078         | 0.104306505       | 2.0075714        | up        | noncoding        |
| ASHGA5P043861        | 0.00018162         | 0.011439647       | 4.4567715        | up        | noncoding        |
| ASHGA5P053399        | 0.001679888        | 0.027439569       | 3.3847312        | up        | noncoding        |
| ASHGA5P022247        | 0.046346584        | 0.138863255       | 5.029163         | up        | noncoding        |
| ASHGA5P044310        | 2.31772E-06        | 0.00231943        | 2.976169         | up        | noncoding        |
| <b>ASHGA5P021016</b> | <b>0.000215596</b> | <b>0.01146874</b> | <b>3.0032892</b> | <b>up</b> | <b>noncoding</b> |
| ASHGA5P028713        | 0.000750371        | 0.018465789       | 2.5690516        | up        | noncoding        |
| ASHGA5P000115        | 0.000957441        | 0.021030899       | 2.1192907        | up        | noncoding        |
| ASHGA5P048450        | 0.041195228        | 0.129607517       | 2.0274968        | up        | noncoding        |
| ASHGA5P054995        | 0.000584616        | 0.016315159       | 2.7037052        | up        | noncoding        |
| ASHGA5P018401        | 0.006014803        | 0.049415317       | 2.8220528        | up        | noncoding        |
| ASHGA5P018401        | 0.006014803        | 0.049415317       | 2.8220528        | up        | noncoding        |

|                        |                    |                     |            |             |          |
|------------------------|--------------------|---------------------|------------|-------------|----------|
| ENST00000438380        | RP11-175D17.3      | GENCODE             | 617        | chr9        | +        |
| ENST00000453454        | AC024560.3         | GENCODE             | 956        | chr3        | -        |
| ENST00000574741        | RP11-156P1.3       | GENCODE             | 836        | chr17       | -        |
| NR_046572              | ARHGEF3-AS1        | RefSeq              | 500        | chr3        | +        |
| BP305238               |                    | LincRNAs identified | 583        | chr7        | -        |
| BP305238               |                    | LincRNAs identified | 583        | chr7        | -        |
| BP305238               |                    | LincRNAs identified | 583        | chr7        | -        |
| BP305238               |                    | LincRNAs identified | 583        | chr7        | -        |
| BP305238               |                    | LincRNAs identified | 583        | chr7        | -        |
| ENST00000563540        | RP11-146F11.5      | GENCODE             | 482        | chr16       | +        |
| BX478947               |                    | LincRNAs identified | 685        | chr1        | -        |
| ENST00000444359        | RP11-316M21.6      | GENCODE             | 846        | chr10       | +        |
| TCONS_00002373         | XLOC_000811        | LincRNAs identified | 364        | chr1        | -        |
| NR_052024              | EIF6               | RefSeq              | 803        | chr20       | -        |
| NR_052024              | EIF6               | RefSeq              | 803        | chr20       | -        |
| NR_052024              | EIF6               | RefSeq              | 803        | chr20       | -        |
| NR_052024              | EIF6               | RefSeq              | 803        | chr20       | -        |
| ENST00000437191        | AC005062.2         | GENCODE             | 571        | chr7        | -        |
| chr13:90287700-902     | chr13:90287700-902 | LincRNAs identified | 11100      | chr13       | -        |
| ENST00000525302        | RP11-1L12.3        | GENCODE             | 583        | chr11       | -        |
| ENST00000568026        | RP11-916L7.1       | GENCODE             | 551        | chr16       | -        |
| ENST00000445845        | RP11-302M6.2       | GENCODE             | 598        | chr1        | -        |
| ENST00000498005        | RP11-167H9.6       | GENCODE             | 525        | chr3        | +        |
| ENST00000420096        | Z83851.4           | GENCODE             | 544        | chr22       | +        |
| ENST00000553507        | RP11-488C13.6      | GENCODE             | 262        | chr14       | -        |
| TCONS_00012039         | XLOC_005574        | LincRNAs identified | 498        | chr6        | -        |
| ENST00000555689        | RP11-589M4.1       | GENCODE             | 528        | chr14       | +        |
| NR_048535              | WDR4               | RefSeq              | 2060       | chr21       | -        |
| NR_048535              | WDR4               | RefSeq              | 2060       | chr21       | -        |
| NR_048535              | WDR4               | RefSeq              | 2060       | chr21       | -        |
| NR_048535              | WDR4               | RefSeq              | 2060       | chr21       | -        |
| NR_048535              | WDR4               | RefSeq              | 2060       | chr21       | -        |
| NR_048535              | WDR4               | RefSeq              | 2060       | chr21       | -        |
| ENST00000434729        | SNHG11             | GENCODE             | 1058       | chr20       | +        |
| ENST00000512717        | RP11-700H6.2       | GENCODE             | 789        | chr17       | +        |
| FN100697               |                    | LincRNAs identified | 104        | chr12       | -        |
| ENST00000523313        | RP11-697M17.1      | GENCODE             | 557        | chr8        | -        |
| uc003myy.1             | LOC100130275       | UCSC_knowngene      | 1488       | chr6        | +        |
| uc003myy.1             | LOC100130275       | UCSC_knowngene      | 1488       | chr6        | +        |
| NR_038336              | DDX39A             | RefSeq              | 1651       | chr19       | -        |
| ENST00000573130        | RP11-473M20.7      | GENCODE             | 2163       | chr16       | -        |
| TCONS_00003580         | XLOC_001356        | LincRNAs identified | 381        | chr2        | +        |
| ENST00000494840        | RP11-219E24.1      | GENCODE             | 2595       | chr3        | -        |
| uc001kgu.3             | KRMP1              | UCSC_knowngene      | 206        | chr10       | +        |
| TCONS_00003617         | XLOC_001406        | LincRNAs identified | 331        | chr2        | +        |
| uc004dsb.1             | AY927613           | UCSC_knowngene      | 329        | chrX        | +        |
| uc004dsb.1             | AY927613           | UCSC_knowngene      | 329        | chrX        | +        |
| NR_038854              | LOC100506668       | RefSeq              | 1897       | chr12       | -        |
| ENST00000523502        | KB-1568E2.1        | GENCODE             | 2072       | chr8        | -        |
| NR_003103              | POT1               | RefSeq              | 4006       | chr7        | -        |
| NR_003103              | POT1               | RefSeq              | 4006       | chr7        | -        |
| TCONS_00018589         | XLOC_008925        | LincRNAs identified | 447        | chr10       | -        |
| ENST00000422008        | GAS5               | GENCODE             | 497        | chr1        | -        |
| ENST00000553410        | RP11-692C24.1      | GENCODE             | 431        | chr15       | +        |
| ENST00000502076        | SNHG6              | GENCODE             | 2578       | chr8        | -        |
| <b>ENST00000523427</b> | <b>PVT1</b>        | <b>GENCODE</b>      | <b>938</b> | <b>chr8</b> | <b>+</b> |
| ENST00000431928        | AL592284.1         | GENCODE             | 1063       | chr1        | -        |
| BF989096R              |                    | LincRNAs identified | 353        | chr18       | -        |
| AW076083               |                    | LincRNAs identified | 433        | chr4        | +        |
| ENST00000528684        | FAM86C2P           | pseudogene          | 1004       | chr11       | -        |
| ENST00000453103        | DGUOK-AS1          | GENCODE             | 601        | chr2        | -        |
| ENST00000453103        | DGUOK-AS1          | GENCODE             | 601        | chr2        | -        |

|           |           |                  |                            |                      |
|-----------|-----------|------------------|----------------------------|----------------------|
| 127532401 | 127535206 |                  | TTAACTCGAGCACTGATGAAGTCCA  | intronic antisense   |
| 197305083 | 197342531 |                  | TCAATCTGGTGGTCTTTTGTTCAC   | intergenic           |
| 45159285  | 45177605  | ENST00000573341  | CTGGGGGAGAGGAGACGCGTGTGC   | intergenic           |
| 56974067  | 56994880  |                  | CCCTTCTCCATTA 100874200    | intronic antisense   |
| 135585497 | 135662101 |                  | TGAGCTCCAGTGCTGTGAATCTCTG  | exon sense-overlappi |
| 135585497 | 135662101 |                  | TGAGCTCCAGTGCTGTGAATCTCTG  | exon sense-overlappi |
| 135585497 | 135662101 |                  | TGAGCTCCAGTGCTGTGAATCTCTG  | exon sense-overlappi |
| 135585497 | 135662101 |                  | TGAGCTCCAGTGCTGTGAATCTCTG  | exon sense-overlappi |
| 135585497 | 135662101 |                  | TGAGCTCCAGTGCTGTGAATCTCTG  | intronic antisense   |
| 30597227  | 30619914  |                  | CTTCCTTCTGCTACTGAGGTGAGAA  | intronic antisense   |
| 111460165 | 111460747 |                  | AAGTTATAGATCTCAAACATAATCCC | intergenic           |
| 101989423 | 101993757 |                  | CACAAAGAAGTCAAAATGGAAACTA  | natural antisense    |
| 44404329  | 44406129  |                  | TTTGAAGGGAGCAAAGGCATCGAA   | intergenic           |
| 33866708  | 33872520  | NM_001267810, NM | ACTTCTACAGGA( 3692         | exon sense-overlappi |
| 33866708  | 33872520  | NM_001267810, NM | ACTTCTACAGGA( 3692         | exon sense-overlappi |
| 33866708  | 33872520  | NM_001267810, NM | ACTTCTACAGGA( 3692         | exon sense-overlappi |
| 33866708  | 33872520  | NM_001267810, NM | ACTTCTACAGGA( 3692         | exon sense-overlappi |
| 19970875  | 20180049  | ENST00000415499  | GAAAATGATAATGAGGAACATCGA   | exon sense-overlappi |
| 91489699  | 91500799  |                  | TTTTTTCCTATCTTAAAGTTCATTC  | intergenic           |
| 27084529  | 27241660  |                  | TTTCTAGGTCATGCTACGGTTACCC  | intronic antisense   |
| 17634187  | 17634842  |                  | TTCTAAGGCTTTCTAAGAAGGATT   | intergenic           |
| 90421224  | 90422281  |                  | TTCAAGGTTTAGTCAAGGCAAAGGA  | intergenic           |
| 149956486 | 149957996 |                  | AACATTTCTGAAATCCTGTTCTTAG  | intergenic           |
| 42672360  | 42673057  |                  | CTGAGCGGCTTCACCATTCAAGTTT  | intronic antisense   |
| 77247050  | 77247799  |                  | CTACTTCAGGGATTGCAAACCTGGCA | natural antisense    |
| 1308820   | 1311276   |                  | AGGTGGAGCTTGACCAAACACTTGT  | intergenic           |
| 53243069  | 53243858  |                  | CTCAAATTGTTCAAGTGGTAAGAAAG | natural antisense    |
| 44269335  | 44299699  |                  | TGGCACATGTTG/ 10785        | exon sense-overlappi |
| 44269335  | 44299699  |                  | TGGCACATGTTG/ 10785        | exon sense-overlappi |
| 44269335  | 44299699  |                  | TGGCACATGTTG/ 10785        | exon sense-overlappi |
| 44269335  | 44299699  |                  | TGGCACATGTTG/ 10785        | exon sense-overlappi |
| 44269335  | 44299699  |                  | TGGCACATGTTG/ 10785        | exon sense-overlappi |
| 44269335  | 44299699  |                  | TGGCACATGTTG/ 10785        | exon sense-overlappi |
| 44269335  | 44299699  |                  | TGGCACATGTTG/ 10785        | exon sense-overlappi |
| 37075399  | 37079564  | ENST00000400436, | TATCCTTGAGCTI 128439       | intergenic           |
| 49021474  | 49026111  |                  | GCACAAAAGGACCTTTCCTTTGACA  | intergenic           |
| 48010161  | 48010265  |                  | CCAGTCTGCAAACCTCAGAAGAAATC | intergenic           |
| 76136132  | 76236551  | ENST00000521147, | ACACATTTGCTGCTTCCATTCTAAAC | intergenic           |
| 10414299  | 10416190  |                  | TTGCTCGCCAGT/ 100130275    | intronic antisense   |
| 10414299  | 10416190  |                  | TTGCTCGCCAGT/ 100130275    | natural antisense    |
| 14519609  | 14529906  |                  | TGTCATGGCCTAC 10212        | exon sense-overlappi |
| 3103367   | 3106233   |                  | AAGGTCACTTTGTCCCTGGATGACC  | intronic antisense   |
| 13141014  | 13353671  |                  | AGATATTCTCTGAGACCGGGAACGT  | intergenic           |
| 95373266  | 95402037  |                  | GAAAAGTATTTATTCTAATCTATTC  | intergenic           |
| 91492812  | 91493018  |                  | TATACATTTTCTAGGGATGGGCATA  | exon sense-overlappi |
| 27975724  | 27980489  |                  | AGTATCTGATGAAGGAGGAAATGG   | intergenic           |
| 53221897  | 53223882  |                  | CAGGAGCTGAGGTCTGAACAATACC  | natural antisense    |
| 53221897  | 53223882  |                  | CAGGAGCTGAGGTCTGAACAATACC  | natural antisense    |
| 120928140 | 120933749 |                  | GTCACTCTTTAAI 100506668    | intronic antisense   |
| 131607544 | 131667958 |                  | GATTTCTACCAATTATTGACAATTC  | intergenic           |
| 124462439 | 124570037 |                  | ATCACTATGGCA( 25913        | exon sense-overlappi |
| 124462439 | 124570037 |                  | ATCACTATGGCA( 25913        | exon sense-overlappi |
| 103461753 | 103464357 |                  | TTTCTCTGACCAGTGCTTGTCTGCT  | intergenic           |
| 173833621 | 173836168 | ENST00000412059, | GCAAAGGTTTT( 60674         | intergenic           |
| 92076120  | 92078325  |                  | AAGACATTAAGCAATCTGTGAAC    | intergenic           |
| 67834229  | 67837776  |                  | TGTGTACTCACTA 641638       | natural antisense    |
| 128806820 | 128903198 |                  | TCCTTGTCATGAC 5820         | intergenic           |
| 144479977 | 144481765 | ENST00000417976  | TGTTTGTGAAAATGGCATAAAGCCG  | intronic antisense   |
| 46489320  | 46490311  |                  | GGACAGCTGGCTGAGATCAAGGATI  | intergenic           |
| 37774187  | 37774619  |                  | GGAATCTACATTCTGGTGCAATGTT  | intergenic           |
| 67560666  | 67572784  |                  | AAGAGACTCATC. 645332       |                      |
| 74174768  | 74208568  |                  | GAACTCTCAGGAGGCTTCCGGAAG   | intronic antisense   |
| 74174768  | 74208568  |                  | GAACTCTCAGGAGGCTTCCGGAAG   | intronic antisense   |

|                 |            |                          |           |           |
|-----------------|------------|--------------------------|-----------|-----------|
| NM_033334       | NR6A1      | nuclear receptor subf -  | 127284702 | 127533576 |
| NM_001128615    | ARHGEF3    | rho guanine nucleotic -  | 56761445  | 57113336  |
| ENST00000393085 | MTPN       | myotrophin [Source:] -   | 135611508 | 135662064 |
| ENST00000435723 | MTPN       | myotrophin [Source:] -   | 135614206 | 135662101 |
| NM_001128619    | LUZP6      | leucine zipper protein - | 135611502 | 135662204 |
| NM_145808       | MTPN       | myotrophin -             | 135611502 | 135662204 |
| ENST00000416501 | AC015987.2 | +                        | 135611541 | 135613214 |
| NM_138447       | ZNF689     | zinc finger protein 68 - | 30614699  | 30621682  |
| NM_018294       | CWF19L1    | CWF19-like protein -     | 101992054 | 102027437 |
| NM_001267810    | EIF6       | eukaryotic translatior - | 33866708  | 33872520  |
| NM_002212       | EIF6       | eukaryotic translatior - | 33866708  | 33872619  |
| NM_181466       | EIF6       | eukaryotic translatior - | 33866708  | 33872619  |
| NM_181468       | EIF6       | eukaryotic translatior - | 33866708  | 33872520  |
| NM_182762       | MACC1      | metastasis-associated -  | 20174278  | 20257013  |
| NM_003986       | BBOX1      | gamma-butyrobetain +     | 27062508  | 27149354  |
| ENST00000515426 | TCF20      | transcription factor 2 - | 42610852  | 42739622  |
| NM_014909       | VASH1      | vasohibin-1 +            | 77228234  | 77249363  |
| NM_198066       | GNPNAT1    | glucosamine 6-phosp -    | 53241910  | 53258386  |
| NM_001260474    | WDR4       | tRNA (guanine-N(7)) -    | 44269335  | 44299693  |
| NM_001260475    | WDR4       | tRNA (guanine-N(7)) -    | 44269335  | 44299693  |
| NM_001260476    | WDR4       | tRNA (guanine-N(7)) -    | 44269335  | 44299699  |
| NM_001260477    | WDR4       | tRNA (guanine-N(7)) -    | 44269335  | 44299385  |
| NM_018669       | WDR4       | tRNA (guanine-N(7)) -    | 44269335  | 44299693  |
| NM_033661       | WDR4       | tRNA (guanine-N(7)) -    | 44263189  | 44299693  |
| NM_001042425    | TFAP2A     | transcription factor A - | 10396915  | 10419797  |
| NM_003220       | TFAP2A     | transcription factor A - | 10396915  | 10415470  |
| NM_005804       | DDX39A     | ATP-dependent RNA -      | 14519609  | 14530195  |
| NM_022468       | MMP25      | matrix metalloprotein +  | 3096681   | 3110724   |
| NM_016195       | KIF20B     | kinesin-like protein K + | 91461366  | 91534700  |
| NM_001146702    | KDM5C      | lysine-specific demet -  | 53220502  | 53254604  |
| NM_004187       | KDM5C      | lysine-specific demet -  | 53220502  | 53254604  |
| NM_001037494    | DYNLL1     | dynein light chain 1, +  | 120907659 | 120936298 |
| NM_001042594    | POT1       | protection of telomer -  | 124462439 | 124570037 |
| NM_015450       | POT1       | protection of telomer -  | 124462439 | 124570037 |
| NM_173518       | MCMD2      | MCM domain-contai +      | 67782983  | 67834283  |
| ENST00000538264 | AL592284.2 | Uncharacterized prot +   | 144339737 | 144521058 |
| NM_080916       | DGUOK      | deoxyguanosine kina +    | 74153952  | 74186088  |
| NM_080918       | DGUOK      | deoxyguanosine kina +    | 74153952  | 74186088  |

|                  |                  |                 |                |                  |                  |
|------------------|------------------|-----------------|----------------|------------------|------------------|
| 36.517909        | 11.027871        | 4.829067        | 3.431378       | 50.213932        | 44.42035         |
| 38028.6205       | 8847.991383      | 14.553849       | 12.199524      | 38255.336        | 43764.42         |
| 165.828363       | 53.200285        | 6.996141        | 5.902136       | 182.91498        | 200.21996        |
| 109.877235       | 26.365919        | 6.365793        | 4.895333       | 137.20523        | 151.5278         |
| 75.158943        | 18.878581        | 5.695313        | 4.492666       | 52.28314         | 70.67467         |
| 75.158943        | 18.878581        | 5.695313        | 4.492666       | 52.28314         | 70.67467         |
| 75.158943        | 18.878581        | 5.695313        | 4.492666       | 52.28314         | 70.67467         |
| 75.158943        | 18.878581        | 5.695313        | 4.492666       | 52.28314         | 70.67467         |
| 75.158943        | 18.878581        | 5.695313        | 4.492666       | 52.28314         | 70.67467         |
| 22.239648        | 6.478617         | 4.129598        | 2.829412       | 24.159523        | 17.455408        |
| 190.58094        | 62.357304        | 7.203342        | 6.140189       | 194.30234        | 192.76855        |
| 108.690326       | 37.066932        | 6.400391        | 5.370954       | 138.85121        | 118.57732        |
| 55.288977        | 11.087623        | 5.424041        | 3.508934       | 45.50894         | 49.06439         |
| 3516.91265       | 960.492633       | 11.334443       | 10.13925       | 4005.0212        | 4279.475         |
| 3516.91265       | 960.492633       | 11.334443       | 10.13925       | 4005.0212        | 4279.475         |
| 3516.91265       | 960.492633       | 11.334443       | 10.13925       | 4005.0212        | 4279.475         |
| 3516.91265       | 960.492633       | 11.334443       | 10.13925       | 4005.0212        | 4279.475         |
| 38.123526        | 7.865309         | 4.691104        | 2.934769       | 29.309525        | 46.044235        |
| 86.461473        | 25.621681        | 6.055446        | 4.764205       | 80.65855         | 51.40939         |
| 410.512652       | 94.971952        | 8.081954        | 6.880045       | 551.927          | 188.41696        |
| 164.808128       | 44.493543        | 6.950131        | 5.761616       | 208.20761        | 212.98756        |
| 27.449007        | 8.01252          | 4.42486         | 3.122812       | 27.53253         | 28.44098         |
| 56.86262         | 16.587065        | 5.471962        | 4.198879       | 53.93308         | 58.96889         |
| 385.858282       | 101.635782       | 8.207799        | 6.890211       | 407.8754         | 358.24915        |
| 27.712391        | 9.730197         | 4.448957        | 3.209452       | 25.904833        | 26.33019         |
| 46.131967        | 5.256773         | 5.119475        | 2.548712       | 41.941734        | 24.666086        |
| 58.826703        | 8.670647         | 5.523288        | 3.368238       | 53.431347        | 57.45349         |
| 149.720198       | 26.226694        | 6.777698        | 5.016625       | 192.12999        | 238.41035        |
| 149.720198       | 26.226694        | 6.777698        | 5.016625       | 192.12999        | 238.41035        |
| 149.720198       | 26.226694        | 6.777698        | 5.016625       | 192.12999        | 238.41035        |
| 149.720198       | 26.226694        | 6.777698        | 5.016625       | 192.12999        | 238.41035        |
| 149.720198       | 26.226694        | 6.777698        | 5.016625       | 192.12999        | 238.41035        |
| 149.720198       | 26.226694        | 6.777698        | 5.016625       | 192.12999        | 238.41035        |
| 149.720198       | 26.226694        | 6.777698        | 5.016625       | 192.12999        | 238.41035        |
| 115.581021       | 36.498973        | 6.441281        | 5.419751       | 144.95808        | 174.89087        |
| 73.57265         | 23.110608        | 5.843674        | 4.5876         | 79.6173          | 81.19433         |
| 55.665959        | 15.243555        | 5.261541        | 4.198513       | 31.487284        | 27.704473        |
| 729.380272       | 159.891451       | 8.859231        | 6.623225       | 784.83276        | 133.6462         |
| 892.564017       | 220.75601        | 9.365237        | 8.013802       | 1048.5907        | 1056.1902        |
| 892.564017       | 220.75601        | 9.365237        | 8.013802       | 1048.5907        | 1056.1902        |
| 41.340898        | 8.64206          | 4.921775        | 3.172277       | 54.35279         | 72.93795         |
| 25.498198        | 7.663424         | 4.35912         | 3.016609       | 25.089148        | 23.232601        |
| 869.048535       | 288.443903       | 9.359294        | 8.251914       | 932.87225        | 1010.513         |
| 299.721498       | 97.720762        | 7.837011        | 6.806438       | 335.17752        | 375.20038        |
| 59.894256        | 7.081966         | 5.503812        | 3.052536       | 72.3442          | 69.4562          |
| 294.120795       | 45.113725        | 7.760419        | 5.705185       | 297.53314        | 396.27017        |
| 39.906585        | 10.912959        | 4.925421        | 3.604939       | 41.78216         | 43.314613        |
| 39.906585        | 10.912959        | 4.925421        | 3.604939       | 41.78216         | 43.314613        |
| 49.540046        | 7.391295         | 5.277865        | 3.160459       | 52.078835        | 61.75961         |
| 27.914229        | 9.220725         | 4.401413        | 3.39353        | 40.047527        | 39.157787        |
| 478.358562       | 141.998762       | 8.425364        | 7.419913       | 425.7385         | 372.95856        |
| 478.358562       | 141.998762       | 8.425364        | 7.419913       | 425.7385         | 372.95856        |
| 50.776144        | 8.666706         | 5.179285        | 3.023286       | 72.99826         | 27.509535        |
| 10158.19638      | 1667.06735       | 12.812007       | 11.052966      | 8714.625         | 7460.4478        |
| 111.816179       | 8.473086         | 5.482886        | 3.152568       | 168.50676        | 8.719618         |
| 213.481817       | 45.405621        | 7.367553        | 5.794096       | 191.2054         | 158.48163        |
| <b>79.926809</b> | <b>17.062318</b> | <b>5.925593</b> | <b>4.33905</b> | <b>67.782166</b> | <b>58.758404</b> |
| 244.415837       | 61.225368        | 7.489521        | 6.128285       | 289.53333        | 144.32426        |
| 144.63131        | 41.838499        | 6.762155        | 5.678574       | 163.5572         | 176.6897         |
| 1670.363983      | 479.097927       | 10.161339       | 9.141639       | 2161.004         | 2851.1426        |
| 758.148362       | 161.8472         | 9.107697        | 7.672759       | 796.947          | 1049.9551        |
| 62.501353        | 18.678645        | 5.457295        | 3.96055        | 58.841583        | 20.832794        |
| 62.501353        | 18.678645        | 5.457295        | 3.96055        | 58.841583        | 20.832794        |

|                  |                  |                  |                   |                  |                  |
|------------------|------------------|------------------|-------------------|------------------|------------------|
| 31.884237        | 27.603092        | 28.783342        | 36.202503         | 12.65942         | 4.9999995        |
| 25277.338        | 7790.621         | 59308.5          | 53775.508         | 11848.081        | 1408.6954        |
| 149.12431        | 114.08172        | 165.72076        | 182.90845         | 68.33108         | 27.696022        |
| 82.181           | 64.82123         | 123.87859        | 99.64956          | 32.835926        | 19.614122        |
| 36.729267        | 162.16516        | 36.86717         | 92.23425          | 18.822016        | 14.213259        |
| 36.729267        | 162.16516        | 36.86717         | 92.23425          | 18.822016        | 14.213259        |
| 36.729267        | 162.16516        | 36.86717         | 92.23425          | 18.822016        | 14.213259        |
| 36.729267        | 162.16516        | 36.86717         | 92.23425          | 18.822016        | 14.213259        |
| 36.729267        | 162.16516        | 36.86717         | 92.23425          | 18.822016        | 14.213259        |
| 20.313232        | 28.51042         | 13.43198         | 29.567327         | 5.6349072        | 4.9999995        |
| 156.0195         | 155.69409        | 250.66527        | 194.03589         | 76.44213         | 43.23573         |
| 106.1045         | 91.63792         | 87.317635        | 109.65337         | 44.08147         | 17.606152        |
| 46.428574        | 48.567047        | 72.8429          | 69.32201          | 9.219546         | 4.9999995        |
| 3902.9243        | 3185.7046        | 2329.532         | 3398.8188         | 701.3255         | 356.5995         |
| 3902.9243        | 3185.7046        | 2329.532         | 3398.8188         | 701.3255         | 356.5995         |
| 3902.9243        | 3185.7046        | 2329.532         | 3398.8188         | 701.3255         | 356.5995         |
| 3902.9243        | 3185.7046        | 2329.532         | 3398.8188         | 701.3255         | 356.5995         |
| 12.217701        | 79.62133         | 19.190996        | 42.35737          | 11.982269        | 4.9999995        |
| 95.426765        | 77.3894          | 99.21093         | 114.673805        | 31.993284        | 14.739149        |
| 779.9464         | 144.18208        | 432.30997        | 366.2935          | 97.987495        | 59.433784        |
| 126.7063         | 100.138176       | 199.80144        | 141.00768         | 44.647644        | 42.1095          |
| 29.782959        | 41.67176         | 20.89999         | 16.365824         | 6.5368714        | 4.9999995        |
| 39.931362        | 77.30818         | 55.45215         | 55.58206          | 21.067057        | 9.786456         |
| 452.0469         | 376.53586        | 303.87808        | 416.5643          | 113.3904         | 44.972183        |
| 29.853022        | 19.66019         | 31.671392        | 32.85472          | 13.249699        | 4.9999995        |
| 77.228546        | 35.030296        | 51.96587         | 45.95927          | 4.9999995        | 5.2650576        |
| 47.003788        | 69.66468         | 48.92978         | 76.477135         | 11.427549        | 5.2589593        |
| 90.89817         | 88.679756        | 138.09329        | 150.10963         | 27.92788         | 28.188229        |
| 90.89817         | 88.679756        | 138.09329        | 150.10963         | 27.92788         | 28.188229        |
| 90.89817         | 88.679756        | 138.09329        | 150.10963         | 27.92788         | 28.188229        |
| 90.89817         | 88.679756        | 138.09329        | 150.10963         | 27.92788         | 28.188229        |
| 90.89817         | 88.679756        | 138.09329        | 150.10963         | 27.92788         | 28.188229        |
| 90.89817         | 88.679756        | 138.09329        | 150.10963         | 27.92788         | 28.188229        |
| 90.89817         | 88.679756        | 138.09329        | 150.10963         | 27.92788         | 28.188229        |
| 108.527596       | 103.62409        | 69.93092         | 91.55457          | 36.49153         | 21.16506         |
| 59.64551         | 90.65832         | 53.938393        | 76.38205          | 20.6603          | 7.9891624        |
| 27.806787        | 54.806084        | 99.124275        | 93.06685          | 13.514861        | 14.970489        |
| 1402.4442        | 725.71857        | 571.5165         | 758.1234          | 245.52382        | 13.51573         |
| 1191.7118        | 626.5689         | 637.2808         | 795.0417          | 287.3929         | 140.1228         |
| 1191.7118        | 626.5689         | 637.2808         | 795.0417          | 287.3929         | 140.1228         |
| 24.597511        | 28.175179        | 35.462162        | 32.519794         | 8.861241         | 4.9999995        |
| 25.79767         | 28.226274        | 21.555386        | 29.08811          | 10.560051        | 4.9999995        |
| 677.64484        | 693.15015        | 969.57477        | 930.5362          | 315.02576        | 108.85429        |
| 283.32867        | 313.93915        | 200.6446         | 290.03867         | 101.69148        | 42.22363         |
| 68.99655         | 30.710285        | 59.831505        | 58.026794         | 4.9999995        | 5.845311         |
| 196.22389        | 391.56207        | 155.91284        | 327.22266         | 60.528625        | 36.143612        |
| 32.95827         | 22.263731        | 50.095108        | 49.025627         | 8.049293         | 6.690165         |
| 32.95827         | 22.263731        | 50.095108        | 49.025627         | 8.049293         | 6.690165         |
| 44.776524        | 40.62386         | 42.715252        | 55.286198         | 9.637973         | 5.3204327        |
| 21.546732        | 17.447016        | 21.81184         | 27.47447          | 10.294519        | 5.828338         |
| 451.2593         | 809.8626         | 235.10191        | 575.2305          | 107.01641        | 106.036415       |
| 451.2593         | 809.8626         | 235.10191        | 575.2305          | 107.01641        | 106.036415       |
| 98.29166         | 47.659527        | 27.565775        | 30.632105         | 6.8198495        | 4.9999995        |
| 9647.771         | 15892.931        | 6521.8315        | 12711.572         | 1222.9513        | 1179.694         |
| 334.307          | 98.92223         | 9.653068         | 50.7884           | 4.9999995        | 4.9999995        |
| 218.19273        | 228.77661        | 212.44563        | 271.7889          | 41.00309         | 26.24553         |
| <b>69.359825</b> | <b>126.55479</b> | <b>55.514862</b> | <b>101.590805</b> | <b>12.376399</b> | <b>10.939619</b> |
| 395.51437        | 159.53087        | 220.50192        | 257.09027         | 86.85609         | 44.7918          |
| 91.37902         | 214.4745         | 96.29282         | 125.39462         | 36.616653        | 34.169502        |
| 994.8761         | 748.2565         | 1678.7437        | 1588.161          | 588.53796        | 266.15057        |
| 439.04993        | 479.79324        | 872.3092         | 910.8357          | 197.82864        | 189.30185        |
| 103.44256        | 36.379597        | 76.662766        | 78.84882          | 9.614739         | 4.9999995        |
| 103.44256        | 36.379597        | 76.662766        | 78.84882          | 9.614739         | 4.9999995        |

|                  |                 |                  |                 |                 |                  |
|------------------|-----------------|------------------|-----------------|-----------------|------------------|
| 24.059645        | 9.384424        | 8.854726         | 6.2090087       | 5.1868286       | 5.355707         |
| 34606.75         | 897.6724        | 2957.1626        | 1369.5869       | 14.813899       | 15.086061        |
| 103.483086       | 41.56991        | 46.73006         | 31.39155        | 7.058047        | 7.395783         |
| 44.397144        | 11.789611       | 28.74348         | 20.815231       | 6.646385        | 7.0079236        |
| 18.240353        | 32.136124       | 13.87174         | 15.987992       | 5.2416797       | 5.9647217        |
| 18.240353        | 32.136124       | 13.87174         | 15.987992       | 5.2416797       | 5.9647217        |
| 18.240353        | 32.136124       | 13.87174         | 15.987992       | 5.2416797       | 5.9647217        |
| 18.240353        | 32.136124       | 13.87174         | 15.987992       | 5.2416797       | 5.9647217        |
| 18.240353        | 32.136124       | 13.87174         | 15.987992       | 5.2416797       | 5.9647217        |
| 4.9999995        | 6.6614313       | 7.4073906        | 9.167972        | 4.1375227       | 4.1276827        |
| 127.37906        | 38.66057        | 39.865902        | 48.560432       | 7.1538815       | 7.3475327        |
| 70.58043         | 37.00782        | 19.307259        | 33.818462       | 6.66297         | 6.665085         |
| 8.735777         | 11.84449        | 22.189453        | 9.536472        | 5.0491295       | 5.4860024        |
| 1136.6143        | 697.5421        | 1795.1074        | 1075.767        | 11.4803095      | 11.631184        |
| 1136.6143        | 697.5421        | 1795.1074        | 1075.767        | 11.4803095      | 11.631184        |
| 1136.6143        | 697.5421        | 1795.1074        | 1075.767        | 11.4803095      | 11.631184        |
| 1136.6143        | 697.5421        | 1795.1074        | 1075.767        | 11.4803095      | 11.631184        |
| 15.17375         | 4.9999995       | 5.0358386        | 4.9999995       | 4.417604        | 5.4014916        |
| 50.49116         | 9.612575        | 16.861708        | 30.03221        | 5.8804207       | 5.548712         |
| 126.26612        | 111.07319       | 86.173706        | 88.897415       | 8.6234255       | 7.3159294        |
| 53.083908        | 30.86961        | 60.83764         | 35.412956       | 7.2483916       | 7.4795403        |
| 10.405619        | 9.258637        | 5.655503         | 11.218488       | 4.3302937       | 4.771877         |
| 25.945261        | 9.158736        | 9.525462         | 24.039415       | 5.2860045       | 5.7211576        |
| 170.43253        | 74.16534        | 119.30967        | 87.54457        | 8.211768        | 8.196291         |
| 20.512966        | 7.808945        | 6.809575         | 4.9999995       | 4.2370005       | 4.6662374        |
| 4.9999995        | 6.2755823       | 4.9999995        | 4.9999995       | 4.928829        | 4.580166         |
| 9.089143         | 8.8801565       | 9.457175         | 7.910899        | 5.2723403       | 5.688736         |
| 21.86391         | 24.809185       | 32.406746        | 22.164217       | 7.1350074       | 7.6345825        |
| 21.86391         | 24.809185       | 32.406746        | 22.164217       | 7.1350074       | 7.6345825        |
| 21.86391         | 24.809185       | 32.406746        | 22.164217       | 7.1350074       | 7.6345825        |
| 21.86391         | 24.809185       | 32.406746        | 22.164217       | 7.1350074       | 7.6345825        |
| 21.86391         | 24.809185       | 32.406746        | 22.164217       | 7.1350074       | 7.6345825        |
| 21.86391         | 24.809185       | 32.406746        | 22.164217       | 7.1350074       | 7.6345825        |
| 21.86391         | 24.809185       | 32.406746        | 22.164217       | 7.1350074       | 7.6345825        |
| 40.455112        | 23.42127        | 60.983818        | 36.47705        | 6.725789        | 7.2087994        |
| 38.047436        | 11.154431       | 40.00361         | 20.80871        | 5.862277        | 6.1488204        |
| 18.662289        | 12.350169       | 19.827824        | 12.135699       | 4.518054        | 4.7364674        |
| 507.73712        | 22.61464        | 111.32112        | 58.636276       | 9.157744        | 6.8307967        |
| 423.81927        | 149.09386       | 177.4755         | 146.63173       | 9.561833        | 9.6990385        |
| 423.81927        | 149.09386       | 177.4755         | 146.63173       | 9.561833        | 9.6990385        |
| 16.86522         | 7.3520575       | 6.3760386        | 7.3978043       | 5.2983294       | 6.0050597        |
| 9.083032         | 9.447727        | 4.9999995        | 6.8897367       | 4.189369        | 4.4962845        |
| 732.9415         | 164.4944        | 200.15982        | 209.18765       | 9.397005        | 9.637304         |
| 194.65723        | 86.640274       | 86.05499         | 75.05697        | 7.935408        | 8.258741         |
| 8.579306         | 7.6300945       | 8.544928         | 6.8921556       | 5.7182283       | 5.943034         |
| 72.588936        | 50.48689        | 22.370333        | 28.563957       | 7.7627907       | 8.333413         |
| 11.62681         | 6.049648        | 20.381628        | 12.680209       | 4.922166        | 5.323417         |
| 11.62681         | 6.049648        | 20.381628        | 12.680209       | 4.922166        | 5.323417         |
| 6.2192707        | 6.866813        | 8.12209          | 8.181189        | 5.2367263       | 5.7849503        |
| 16.419401        | 6.33314         | 6.903862         | 9.545087        | 4.8627152       | 5.1884604        |
| 81.423294        | 169.56767       | 145.26337        | 242.68541       | 8.273193        | 8.250728         |
| 81.423294        | 169.56767       | 145.26337        | 242.68541       | 8.273193        | 8.250728         |
| 15.412652        | 14.767738       | 4.9999995        | 4.9999995       | 5.7331724       | 4.7281084        |
| 1235.7389        | 1866.7906       | 2600.5046        | 1896.7247       | 12.594571       | 12.404257        |
| 7.195631         | 12.332378       | 10.71527         | 10.595239       | 6.9406652       | 3.2312198        |
| 53.66518         | 45.421677       | 59.90761         | 46.19064        | 7.1282496       | 7.068897         |
| <b>13.677021</b> | <b>24.38367</b> | <b>22.738592</b> | <b>18.25861</b> | <b>5.622878</b> | <b>5.7158804</b> |
| 112.20957        | 40.379276       | 44.475307        | 38.640167       | 7.72486         | 6.940894         |
| 44.124737        | 63.18168        | 26.877522        | 46.0609         | 6.8956866       | 7.2234597        |
| 960.9075         | 388.87683       | 344.3622         | 325.7525        | 10.600697       | 11.061976        |
| 177.09843        | 144.00763       | 140.67236        | 122.17429       | 9.1765995       | 9.690059         |
| 18.759052        | 6.0033064       | 46.835297        | 25.859478       | 5.4185853       | 4.3497925        |
| 18.759052        | 6.0033064       | 46.835297        | 25.859478       | 5.4185853       | 4.3497925        |

|                  |                 |                 |                 |                  |                |
|------------------|-----------------|-----------------|-----------------|------------------|----------------|
| 4.6830854        | 4.3235664       | 4.713121        | 4.7120953       | 3.889101         | 2.4279919      |
| 14.364794        | 12.583225       | 15.402314       | 15.072802       | 13.790269        | 11.337718      |
| 6.8923244        | 6.497556        | 7.1448784       | 6.9882574       | 6.3292575        | 5.62692        |
| 6.0431924        | 5.646363        | 6.732023        | 6.118871        | 5.2683916        | 5.1202636      |
| 4.884555         | 7.0202956       | 5.050795        | 6.00983         | 4.4688506        | 4.6402507      |
| 4.884555         | 7.0202956       | 5.050795        | 6.00983         | 4.4688506        | 4.6402507      |
| 4.884555         | 7.0202956       | 5.050795        | 6.00983         | 4.4688506        | 4.6402507      |
| 4.884555         | 7.0202956       | 5.050795        | 6.00983         | 4.4688506        | 4.6402507      |
| 4.884555         | 7.0202956       | 5.050795        | 6.00983         | 4.4688506        | 4.6402507      |
| 4.025434         | 4.3724475       | 3.6813183       | 4.4331803       | 2.6973226        | 2.4279919      |
| 6.950888         | 6.9601846       | 7.7302284       | 7.077339        | 6.4801035        | 6.280188       |
| 6.411529         | 6.164458        | 6.2418895       | 6.2564144       | 5.695669         | 4.961122       |
| 5.2159524        | 5.2072406       | 5.982767        | 5.6031547       | 3.4181259        | 2.4279919      |
| 11.564221        | 11.305792       | 10.908756       | 11.116395       | 9.747459         | 9.353385       |
| 11.564221        | 11.305792       | 10.908756       | 11.116395       | 9.747459         | 9.353385       |
| 11.564221        | 11.305792       | 10.908756       | 11.116395       | 9.747459         | 9.353385       |
| 11.564221        | 11.305792       | 10.908756       | 11.116395       | 9.747459         | 9.353385       |
| 3.2825963        | 5.9547          | 4.1654124       | 4.924819        | 3.8130364        | 2.4279919      |
| 6.253614         | 5.91164         | 6.419143        | 6.319147        | 5.2302775        | 4.6919217      |
| 9.259303         | 6.845393        | 8.498161        | 7.949512        | 6.847015         | 6.7450323      |
| 6.6614027        | 6.294335        | 7.4070687       | 6.6100464       | 5.711854         | 6.240376       |
| 4.5876474        | 4.9668937       | 4.2813272       | 3.6111238       | 2.9043539        | 2.4279919      |
| 5.0021043        | 5.9102693       | 5.607611        | 5.304624        | 4.635839         | 4.0720043      |
| 8.470838         | 8.236581        | 7.998141        | 8.133172        | 7.060309         | 6.336935       |
| 4.591385         | 3.7738929       | 4.8423557       | 4.5828695       | 3.9553974        | 2.4279919      |
| 5.955542         | 4.6950574       | 5.520516        | 5.0367393       | 2.3467326        | 3.1275885      |
| 5.236319         | 5.755562        | 5.4393625       | 5.747406        | 3.745138         | 3.1256516      |
| 6.188476         | 6.116856        | 6.8886895       | 6.7025757       | 5.0398574        | 5.6542716      |
| 6.188476         | 6.116856        | 6.8886895       | 6.7025757       | 5.0398574        | 5.6542716      |
| 6.188476         | 6.116856        | 6.8886895       | 6.7025757       | 5.0398574        | 5.6542716      |
| 6.188476         | 6.116856        | 6.8886895       | 6.7025757       | 5.0398574        | 5.6542716      |
| 6.188476         | 6.116856        | 6.8886895       | 6.7025757       | 5.0398574        | 5.6542716      |
| 6.188476         | 6.116856        | 6.8886895       | 6.7025757       | 5.0398574        | 5.6542716      |
| 6.4430714        | 6.3451195       | 5.926499        | 5.998408        | 5.42693          | 5.235102       |
| 5.5864143        | 6.1493278       | 5.5699444       | 5.7452593       | 4.6066203        | 3.7616313      |
| 4.487645         | 5.38837         | 6.417212        | 6.0214953       | 3.984831         | 4.7162933      |
| 10.083012        | 9.197691        | 8.900707        | 8.985438        | 8.199003         | 4.558445       |
| 9.851664         | 8.975401        | 9.046899        | 9.056586        | 8.427569         | 7.977901       |
| 9.851664         | 8.975401        | 9.046899        | 9.056586        | 8.427569         | 7.977901       |
| 4.3102117        | 4.3526316       | 4.9957995       | 4.568616        | 3.3616679        | 2.4279919      |
| 4.3783617        | 4.3568316       | 4.326484        | 4.40739         | 3.6274884        | 2.4279919      |
| 9.042079         | 9.131728        | 9.66805         | 9.2796          | 8.572605         | 7.6110425      |
| 7.8095045        | 7.9720025       | 7.412202        | 7.634206        | 6.906183         | 6.2459517      |
| 5.7977057        | 4.4931965       | 5.7136416       | 5.357065        | 2.3467326        | 3.2896845      |
| 7.3008018        | 8.29456         | 7.065579        | 7.805371        | 6.1544623        | 6.0230484      |
| 4.7304535        | 3.978674        | 5.4707227       | 5.127093        | 3.2106555        | 3.5022998      |
| 4.7304535        | 3.978674        | 5.4707227       | 5.127093        | 3.2106555        | 3.5022998      |
| 5.164958         | 4.9255667       | 5.258837        | 5.2961526       | 3.4912353        | 3.1448622      |
| 4.1108203        | 3.5801945       | 4.342724        | 4.3235664       | 3.589954         | 3.2834003      |
| 8.467389         | 9.346241        | 7.63198         | 8.582654        | 6.9784765        | 7.574872       |
| 8.467389         | 9.346241        | 7.63198         | 8.582654        | 6.9784765        | 7.574872       |
| 6.29789          | 5.176109        | 4.655272        | 4.485157        | 2.967167         | 2.4279919      |
| 12.909136        | 13.621698       | 12.339968       | 13.002414       | 10.5570965       | 11.081052      |
| 8.050286         | 6.2779746       | 3.2233045       | 5.1738677       | 2.3467326        | 2.4279919      |
| 7.4483156        | 7.5330043       | 7.489253        | 7.5375977       | 5.593311         | 5.549306       |
| <b>5.8056364</b> | <b>6.652924</b> | <b>5.609582</b> | <b>6.146659</b> | <b>3.8587291</b> | <b>4.24169</b> |
| 8.277728         | 6.9980917       | 7.5387526       | 7.456801        | 6.669389         | 6.32963        |
| 6.1961746        | 7.4336886       | 6.377026        | 6.446896        | 5.429809         | 5.9349227      |
| 9.586453         | 9.240418        | 10.42822        | 10.05027        | 9.475051         | 8.921411       |
| 8.429304         | 8.591605        | 9.513567        | 9.245046        | 7.8730164        | 8.420225       |
| 6.3765316        | 4.7532887       | 6.056242        | 5.789332        | 3.48692          | 2.4279919      |
| 6.3765316        | 4.7532887       | 6.056242        | 5.789332        | 3.48692          | 2.4279919      |



|           |           |            |           |
|-----------|-----------|------------|-----------|
| 4.614075  | 3.3287625 | 3.4342847  | 2.8940525 |
| 14.999971 | 10.283728 | 11.781255  | 11.004203 |
| 6.6566997 | 5.616732  | 5.817911   | 5.3652983 |
| 5.4698343 | 3.6708906 | 5.1222267  | 4.7203903 |
| 4.244282  | 5.217492  | 4.0659833  | 4.3191347 |
| 4.244282  | 5.217492  | 4.0659833  | 4.3191347 |
| 4.244282  | 5.217492  | 4.0659833  | 4.3191347 |
| 4.244282  | 5.217492  | 4.0659833  | 4.3191347 |
| 4.244282  | 5.217492  | 4.0659833  | 4.3191347 |
| 2.350709  | 2.836006  | 3.1866665  | 3.4777744 |
| 6.952528  | 5.5088496 | 5.591009   | 6.0284534 |
| 6.1118073 | 5.4427023 | 4.536811   | 5.477615  |
| 3.250031  | 3.6758711 | 4.743839   | 3.5377455 |
| 10.091462 | 9.91113   | 11.0612545 | 10.670811 |
| 10.091462 | 9.91113   | 11.0612545 | 10.670811 |
| 10.091462 | 9.91113   | 11.0612545 | 10.670811 |
| 10.091462 | 9.91113   | 11.0612545 | 10.670811 |
| 3.9885035 | 2.3408759 | 2.6854556  | 2.352752  |
| 5.652783  | 3.3599436 | 4.351824   | 5.298483  |
| 6.940233  | 7.142674  | 6.6834564  | 6.9218607 |
| 5.720479  | 5.15769   | 6.191215   | 5.548082  |
| 3.4836776 | 3.3069425 | 2.8312874  | 3.7826176 |
| 4.721429  | 3.2886584 | 3.5371802  | 4.938165  |
| 7.3643236 | 6.5330515 | 7.1467557  | 6.899891  |
| 4.3993173 | 3.0522783 | 3.0689743  | 2.352752  |
| 2.350709  | 2.7526717 | 2.3618152  | 2.352752  |
| 3.302375  | 3.2498379 | 3.5294843  | 3.2569432 |
| 4.4832006 | 4.819709  | 5.2895956  | 4.813118  |
| 4.4832006 | 4.819709  | 5.2895956  | 4.813118  |
| 4.4832006 | 4.819709  | 5.2895956  | 4.813118  |
| 4.4832006 | 4.819709  | 5.2895956  | 4.813118  |
| 4.4832006 | 4.819709  | 5.2895956  | 4.813118  |
| 4.4832006 | 4.819709  | 5.2895956  | 4.813118  |
| 5.336752  | 4.7317834 | 6.1956625  | 5.5922737 |
| 5.2512145 | 3.59052   | 5.596192   | 4.719424  |
| 4.271352  | 3.7420893 | 4.5733356  | 3.9031775 |
| 8.9419365 | 4.6727796 | 7.05524    | 6.311948  |
| 8.679562  | 7.592475  | 7.7155695  | 7.6897326 |
| 8.679562  | 7.592475  | 7.7155695  | 7.6897326 |
| 4.1332693 | 2.9704218 | 2.9874654  | 3.1528482 |
| 3.3015637 | 3.33721   | 2.3618152  | 3.0435836 |
| 9.46278   | 7.7353005 | 7.89518    | 8.234578  |
| 7.5555167 | 6.768513  | 6.681616   | 6.680845  |
| 3.2253118 | 3.0211706 | 3.3883796  | 3.043935  |
| 6.155937  | 5.9305    | 4.7562895  | 5.21087   |
| 3.6326103 | 2.7024727 | 4.615554   | 3.9660418 |
| 3.6326103 | 2.7024727 | 4.615554   | 3.9660418 |
| 2.8294182 | 2.8759942 | 3.314162   | 3.3070807 |
| 4.095331  | 2.7642784 | 3.088338   | 3.5398755 |
| 6.314666  | 7.7786613 | 7.4152036  | 8.457598  |
| 6.314666  | 7.7786613 | 7.4152036  | 8.457598  |
| 4.0096884 | 4.0203004 | 2.3618152  | 2.352752  |
| 10.215148 | 11.372682 | 11.593684  | 11.498134 |
| 3.0028353 | 3.7401023 | 3.7005663  | 3.6971796 |
| 5.738274  | 5.759463  | 6.171242   | 5.9529824 |
| 3.8473296 | 4.7915974 | 4.7794514  | 4.515502  |
| 6.772745  | 5.5724835 | 5.7432103  | 5.6822543 |
| 5.461342  | 6.280188  | 5.0173407  | 5.94784   |
| 9.846637  | 9.055908  | 8.662384   | 8.888445  |
| 7.4206467 | 7.543465  | 7.3708143  | 7.408386  |
| 4.2789593 | 2.6937456 | 5.822558   | 5.0531273 |
| 4.2789593 | 2.6937456 | 5.822558   | 5.0531273 |

|               |             |             |           |    |           |
|---------------|-------------|-------------|-----------|----|-----------|
| ASHGA5P044962 | 0.00341991  | 0.037690616 | 2.2904215 | up | noncoding |
| ASHGA5P032707 | 0.028761723 | 0.10581013  | 2.8365354 | up | noncoding |
| ASHGA5P037126 | 0.000657628 | 0.017168766 | 2.7387288 | up | noncoding |
| ASHGA5P041019 | 0.00164009  | 0.02720749  | 2.0507916 | up | noncoding |
| ASHGA5P028248 | 0.000196484 | 0.01146874  | 3.5595812 | up | noncoding |
| ASHGA5P037045 | 0.012452022 | 0.068356958 | 2.2543206 | up | noncoding |
| ASHGA5P039452 | 0.008893146 | 0.058842304 | 6.029481  | up | noncoding |
| ASHGA5P035635 | 0.000562929 | 0.016101946 | 2.4726924 | up | noncoding |
| ASHGA5P022539 | 0.001255143 | 0.02370642  | 2.4671059 | up | noncoding |
| ASHGA5P039047 | 0.001215898 | 0.023487681 | 2.4848536 | up | noncoding |
| ASHGA5P039047 | 0.001215898 | 0.023487681 | 2.4848536 | up | noncoding |
| ASHGA5P021511 | 0.000571707 | 0.016151364 | 2.1750195 | up | noncoding |
| ASHGA5P036334 | 0.015464833 | 0.076002496 | 2.8048465 | up | noncoding |
| ASHGA5P036334 | 0.015464833 | 0.076002496 | 2.8048465 | up | noncoding |
| ASHGA5P036334 | 0.015464833 | 0.076002496 | 2.8048465 | up | noncoding |
| ASHGA5P039027 | 0.033221327 | 0.114846653 | 2.6578025 | up | noncoding |
| ASHGA5P029351 | 0.001797217 | 0.028435129 | 3.800567  | up | noncoding |
| ASHGA5P028676 | 0.00087188  | 0.019883224 | 2.3952402 | up | noncoding |
| ASHGA5P030816 | 0.002744502 | 0.033931843 | 3.4415946 | up | noncoding |
| ASHGA5P030816 | 0.002744502 | 0.033931843 | 3.4415946 | up | noncoding |
| ASHGA5P030816 | 0.002744502 | 0.033931843 | 3.4415946 | up | noncoding |
| ASHGA5P030816 | 0.002744502 | 0.033931843 | 3.4415946 | up | noncoding |
| ASHGA5P035554 | 0.006957855 | 0.052947146 | 2.543462  | up | noncoding |
| ASHGA5P032676 | 8.7194E-05  | 0.008766146 | 4.9276375 | up | noncoding |
| ASHGA5P032676 | 8.7194E-05  | 0.008766146 | 4.9276375 | up | noncoding |
| ASHGA5P032676 | 8.7194E-05  | 0.008766146 | 4.9276375 | up | noncoding |
| ASHGA5P043827 | 0.00034545  | 0.013385271 | 7.1785115 | up | noncoding |
| ASHGA5P014852 | 0.015174398 | 0.075388534 | 2.1968029 | up | noncoding |
| ASHGA5P033504 | 0.001010924 | 0.021549372 | 4.0143183 | up | noncoding |
| ASHGA5P019467 | 0.006287672 | 0.050596613 | 2.2571034 | up | noncoding |
| ASHGA5P019467 | 0.006287672 | 0.050596613 | 2.2571034 | up | noncoding |
| ASHGA5P052897 | 0.01674407  | 0.078875667 | 2.5813928 | up | noncoding |
| ASHGA5P021967 | 0.002158734 | 0.030562731 | 2.232472  | up | noncoding |
| ASHGA5P056801 | 0.001669105 | 0.027358461 | 3.4418765 | up | noncoding |
| ASHGA5P045302 | 0.016588707 | 0.078580714 | 2.3499889 | up | noncoding |
| ASHGA5P054278 | 0.012594417 | 0.068740842 | 4.4975476 | up | noncoding |
| ASHGA5P050404 | 0.000451876 | 0.014983741 | 2.0435707 | up | noncoding |
| ASHGA5P015648 | 0.000647062 | 0.017096671 | 2.8957105 | up | noncoding |
| ASHGA5P036499 | 0.004321334 | 0.041670179 | 2.0599079 | up | noncoding |
| ASHGA5P030854 | 0.000731888 | 0.018183732 | 2.5023377 | up | noncoding |
| ASHGA5P030854 | 0.000731888 | 0.018183732 | 2.5023377 | up | noncoding |
| ASHGA5P035261 | 0.015631432 | 0.076538741 | 2.9142194 | up | noncoding |
| ASHGA5P049943 | 0.000262998 | 0.01219365  | 4.7195022 | up | noncoding |
| ASHGA5P049943 | 0.000262998 | 0.01219365  | 4.7195022 | up | noncoding |
| ASHGA5P049943 | 0.000262998 | 0.01219365  | 4.7195022 | up | noncoding |
| ASHGA5P049943 | 0.000262998 | 0.01219365  | 4.7195022 | up | noncoding |
| ASHGA5P049943 | 0.000262998 | 0.01219365  | 4.7195022 | up | noncoding |
| ASHGA5P049943 | 0.000262998 | 0.01219365  | 4.7195022 | up | noncoding |
| ASHGA5P049943 | 0.000262998 | 0.01219365  | 4.7195022 | up | noncoding |
| ASHGA5P049943 | 0.000262998 | 0.01219365  | 4.7195022 | up | noncoding |
| ASHGA5P014188 | 0.00015681  | 0.011056858 | 6.8356822 | up | noncoding |
| ASHGA5P032251 | 0.011116094 | 0.065090819 | 2.4579221 | up | noncoding |
| ASHGA5P025709 | 0.018181499 | 0.081962493 | 2.6805255 | up | noncoding |
| ASHGA5P027770 | 0.033221861 | 0.114846653 | 3.3975072 | up | noncoding |
| ASHGA5P028788 | 0.00498557  | 0.044828687 | 4.897791  | up | noncoding |
| ASHGA5P025487 | 0.009019255 | 0.059313506 | 2.0761239 | up | noncoding |
| ASHGA5P025487 | 0.009019255 | 0.059313506 | 2.0761239 | up | noncoding |
| ASHGA5P040476 | 0.0459807   | 0.138173601 | 2.1285615 | up | noncoding |
| ASHGA5P028430 | 0.005908911 | 0.048960114 | 2.1752966 | up | noncoding |
| ASHGA5P054247 | 0.000146659 | 0.01076444  | 2.0335684 | up | noncoding |
| ASHGA5P047820 | 0.028337824 | 0.105047356 | 2.2076015 | up | noncoding |
| ASHGA5P049096 | 0.00488783  | 0.044366328 | 2.0328507 | up | noncoding |

|                 |                |                     |      |       |   |
|-----------------|----------------|---------------------|------|-------|---|
| uc010mce.2      | BX641143       | UCSC_knowngene      | 4286 | chr8  | + |
| ENST00000433576 | RP11-815M8.1   | GENCODE             | 720  | chr1  | - |
| uc010gir.2      | BC037891       | UCSC_knowngene      | 1165 | chr20 | + |
| ENST00000509649 | RP11-823P9.1   | GENCODE             | 362  | chr5  | + |
| ENST00000547750 | RP11-61E11.1   | GENCODE             | 289  | chr12 | + |
| TCONS_00025500  | XLOC_012315    | LincRNAs identified | 1194 | chr17 | + |
| ENST00000510419 | AC142293.3     | GENCODE             | 732  | chr4  | - |
| uc002vyh.3      | AF055024       | UCSC_knowngene      | 1834 | chr2  | - |
| ENST00000558556 | CTD-2008A1.2   | pseudogene          | 1069 | chr15 | - |
| ENST00000513802 | RP11-231L11.3  | GENCODE             | 393  | chr3  | + |
| ENST00000513802 | RP11-231L11.3  | GENCODE             | 393  | chr3  | + |
| ENST00000533775 | TSSC2          | GENCODE             | 1210 | chr11 | + |
| ENST00000489557 | RP11-486F17.1  | GENCODE             | 831  | chr2  | + |
| ENST00000489557 | RP11-486F17.1  | GENCODE             | 831  | chr2  | + |
| ENST00000489557 | RP11-486F17.1  | GENCODE             | 831  | chr2  | + |
| uc003erl.1      | AX746877       | UCSC_knowngene      | 1139 | chr3  | + |
| ENST00000557778 | RP11-1029J19.5 | GENCODE             | 454  | chr14 | - |
| ENST00000417976 | BX248398.1     | GENCODE             | 1054 | chr1  | - |
| ENST00000558696 | RP11-299G20.3  | GENCODE             | 639  | chr15 | + |
| ENST00000558696 | RP11-299G20.3  | GENCODE             | 639  | chr15 | + |
| ENST00000558696 | RP11-299G20.3  | GENCODE             | 639  | chr15 | + |
| ENST00000558696 | RP11-299G20.3  | GENCODE             | 639  | chr15 | + |
| ENST00000423530 | LINC00607      | GENCODE             | 2104 | chr2  | - |
| uc021uec.1      | EPR-1          | UCSC_knowngene      | 624  | chr17 | - |
| uc021uec.1      | EPR-1          | UCSC_knowngene      | 624  | chr17 | - |
| uc021uec.1      | EPR-1          | UCSC_knowngene      | 624  | chr17 | - |
| ENST00000429254 | RP11-132A1.3   | GENCODE             | 756  | chr7  | + |
| ENST00000414065 | AC018685.1     | GENCODE             | 547  | chr2  | - |
| ENST00000578278 | RP11-146G7.3   | GENCODE             | 695  | chr18 | - |
| ENST00000486431 | RP11-666A20.1  | GENCODE             | 1671 | chr3  | + |
| ENST00000486431 | RP11-666A20.1  | GENCODE             | 1671 | chr3  | + |
| NR_073096       | SERAC1         | RefSeq              | 1963 | chr6  | - |
| ENST00000545800 | RP11-783K16.13 | GENCODE             | 853  | chr11 | - |
| TCONS_00008753  | XLOC_003455    | LincRNAs identified | 217  | chr4  | + |
| ENST00000418478 | RP11-213G2.2   | GENCODE             | 360  | chr9  | - |
| uc001hpx.3      | BC032899       | UCSC_knowngene      | 506  | chr1  | + |
| ENST00000438414 | AC008073.7     | GENCODE             | 674  | chr2  | - |
| ENST00000422201 | AC093732.1     | GENCODE             | 504  | chr2  | - |
| ENST00000445199 | AC093171.1     | GENCODE             | 517  | chr2  | + |
| ENST00000563223 | LA16c-390E6.3  | GENCODE             | 307  | chr16 | - |
| ENST00000563223 | LA16c-390E6.3  | GENCODE             | 307  | chr16 | - |
| ENST00000449075 | AC093901.1     | GENCODE             | 580  | chr2  | - |
| uc002kmj.1      | AK091102       | UCSC_knowngene      | 1917 | chr18 | + |
| uc002kmj.1      | AK091102       | UCSC_knowngene      | 1917 | chr18 | + |
| uc002kmj.1      | AK091102       | UCSC_knowngene      | 1917 | chr18 | + |
| uc002kmj.1      | AK091102       | UCSC_knowngene      | 1917 | chr18 | + |
| uc002kmj.1      | AK091102       | UCSC_knowngene      | 1917 | chr18 | + |
| uc002kmj.1      | AK091102       | UCSC_knowngene      | 1917 | chr18 | + |
| uc002kmj.1      | AK091102       | UCSC_knowngene      | 1917 | chr18 | + |
| uc002kmj.1      | AK091102       | UCSC_knowngene      | 1917 | chr18 | + |
| ENST00000400831 | RP11-351J23.1  | GENCODE             | 2557 | chr6  | - |
| ENST00000573168 | CTC-457L16.2   | GENCODE             | 2673 | chr17 | - |
| NR_027405       | MTHFD2         | RefSeq              | 2306 | chr2  | + |
| TCONS_00010144  | XLOC_004611    | LincRNAs identified | 1464 | chr5  | + |
| ENST00000432967 | AKAP11-IT1     | GENCODE             | 539  | chr13 | + |
| NR_003104       | POT1           | RefSeq              | 4192 | chr7  | - |
| NR_003104       | POT1           | RefSeq              | 4192 | chr7  | - |
| ENST00000515199 | CTC-537E7.2    | GENCODE             | 340  | chr5  | - |
| ENST00000577004 | RP11-363G2.5   | GENCODE             | 1177 | chr13 | - |
| NR_026761       | LINC00467      | RefSeq              | 797  | chr1  | + |
| ENST00000449749 | AC068580.7     | GENCODE             | 338  | chr11 | - |
| ENST00000564490 | CTD-2380F24.1  | GENCODE             | 686  | chr16 | - |

|           |           |                                                 |                            |
|-----------|-----------|-------------------------------------------------|----------------------------|
| 104476927 | 104481213 | ATAGCCAAGTGTTTTGCTTATTTACT                      | intergenic                 |
| 222054322 | 222092054 | GCATTTTCCTGTCCCTTCTAAAATT                       | intergenic                 |
| 55841852  | 55858053  | AGAAGAGAGCTCCAGTTACCAGGGC                       | bidirectional              |
| 21459605  | 21462099  | AAGAAGTTCAGATATTTGTCGTTTT                       | intergenic                 |
| 105466263 | 105467799 | CTCTGGCCAATTAGTGCCAACCTTCA                      | natural antisense          |
| 75249855  | 75266597  | GTTGATAAATATTCCTGACCCAGCC                       | intergenic                 |
| 75418300  | 75514664  | ATTTAGAAAGATATCTTCACTCCAA                       | intronic antisense         |
| 239359012 | 239360880 | CAACCAACATTTTGTGTTTGAACCA                       | natural antisense          |
| 45119257  | 45154048  | NM_003104, NR_03 TGCATGGACCAGGTGACTTGCGCCTGGAGA | ACTATCCT                   |
| 140691585 | 140692097 | CTGGTGGAATCTGTAGGTAATTAAG                       | intron sense-overlap       |
| 140691585 | 140692097 | CTGGTGGAATCTGTAGGTAATTAAG                       | intron sense-overlap       |
| 3404691   | 3430191   | TAGAAAGTAGAGTTTGAACAACTGA                       | intergenic                 |
| 200190032 | 200194085 | GTCCTGCTTAGCTTTACAAATCTGCC                      | natural antisense          |
| 200190032 | 200194085 | GTCCTGCTTAGCTTTACAAATCTGCC                      | natural antisense          |
| 200190032 | 200194085 | GTCCTGCTTAGCTTTACAAATCTGCC                      | natural antisense          |
| 136734712 | 136735851 | TTCCACTTGAACCTTCTGAGAACGG                       | intergenic                 |
| 102100790 | 102197445 | AAGGTGTTGAAGCATAGACGCTGG                        | intronic antisense         |
| 144299757 | 144301536 | ENST00000431928 TCATGTGCTTGTGAAAATGGCATAA       | intergenic                 |
| 101874641 | 101877633 | CCTTTGGAAGACGTAAAAATGAGAA                       | intronic antisense         |
| 101874641 | 101877633 | CCTTTGGAAGACGTAAAAATGAGAA                       | intronic antisense         |
| 101874641 | 101877633 | CCTTTGGAAGACGTAAAAATGAGAA                       | intronic antisense         |
| 101874641 | 101877633 | CCTTTGGAAGACGTAAAAATGAGAA                       | intronic antisense         |
| 216484357 | 216692126 | CAGACTCATAAA                                    | 646324 intergenic          |
| 76220156  | 76220780  | TTGTTAAACAGTAGAGGAGCCAGGC                       | natural antisense          |
| 76220156  | 76220780  | TTGTTAAACAGTAGAGGAGCCAGGC                       | natural antisense          |
| 76220156  | 76220780  | TTGTTAAACAGTAGAGGAGCCAGGC                       | natural antisense          |
| 100942893 | 100944551 | ATCTGAAGCATTTTTCTCACTTTAA                       | intergenic                 |
| 2645760   | 2660402   | GGCACACAAGATTTCTAGATGGCT                        | intergenic                 |
| 6925475   | 6926989   | ENST00000580197, CCACCGAATTTCAAGAGCCCAAGCA      | intergenic                 |
| 125635467 | 125648832 | CATCAAAAAGGCCAGGCCAGGATCA                       | natural antisense          |
| 125635467 | 125648832 | CATCAAAAAGGCCAGGCCAGGATCA                       | natural antisense          |
| 158535502 | 158589312 | TCTCATTTTATAA                                   | 84947 exon sense-overlappi |
| 64014410  | 64016966  | GTGGCACAAAGCCTTCTGAGGAAATG                      | exon sense-overlappi       |
| 11315512  | 11330339  | TCONS_00007986, 'GTCAAAGAAATCTTATGAAGCAAGC      | intergenic                 |
| 88400636  | 88406454  | ENST00000439378 CTGCTGTTCTTGCTACTAGTGAATTC      | intergenic                 |
| 226271655 | 226277994 | CTTTCTATGAGGTCCTAGGAATGAA                       | intergenic                 |
| 24392817  | 24397874  | CGCCGAGGCCCGCCGCCCTTCTG                         | bidirectional              |
| 47262417  | 47267663  | TGATATGAAAACAAACAAAACAACC                       | intronic antisense         |
| 230990025 | 231032210 | TTTTTCCTGGGAAAGAAAACCTTGT                       | intergenic                 |
| 1517673   | 1522685   | GGTTTCCTGTCTGTCTTTGCAAATAC                      | intron sense-overlapp      |
| 1517673   | 1522685   | GGTTTCCTGTCTGTCTTTGCAAATAC                      | intron sense-overlapp      |
| 118940514 | 118943949 | GATGGATGTCTGGAATCGTTGTGAT                       | intergenic                 |
| 3604967   | 3606884   | CCTTCTACACTGACCAGTAGTTTTGC                      | intronic antisense         |
| 3604967   | 3606884   | CCTTCTACACTGACCAGTAGTTTTGC                      | intronic antisense         |
| 3604967   | 3606884   | CCTTCTACACTGACCAGTAGTTTTGC                      | intronic antisense         |
| 3604967   | 3606884   | CCTTCTACACTGACCAGTAGTTTTGC                      | intronic antisense         |
| 3604967   | 3606884   | CCTTCTACACTGACCAGTAGTTTTGC                      | intronic antisense         |
| 3604967   | 3606884   | CCTTCTACACTGACCAGTAGTTTTGC                      | intronic antisense         |
| 3604967   | 3606884   | CCTTCTACACTGACCAGTAGTTTTGC                      | intronic antisense         |
| 3604967   | 3606884   | CCTTCTACACTGACCAGTAGTTTTGC                      | intronic antisense         |
| 168080305 | 168084467 | TTCCCAAGGCAGAGATGAAGAATGC                       | intergenic                 |
| 19044329  | 19047002  | TTCAGGTCTGATCATGTGCGTGTGC                       | intronic antisense         |
| 74425689  | 74442424  | CGGCAGTTCGGG                                    | 10797 exon sense-overlappi |
| 154258473 | 154263999 | GGCCTAGGAATGGATGTCACTGGAA                       | intergenic                 |
| 42848463  | 42851124  | CCTGGGTTAAAATTCTGAACATATT                       | intron sense-overlapp      |
| 124462439 | 124570037 | GTACTIONAAGGTT                                  | 25913 exon sense-overlappi |
| 124462439 | 124570037 | GTACTIONAAGGTT                                  | 25913 exon sense-overlappi |
| 67827516  | 67829357  | CTGAAGAACCCTTCTGATATTGT                         | intergenic                 |
| 23468794  | 23490508  | TTATTTCTTTTAAAATACCTTGGTC                       | intergenic                 |
| 211556096 | 211605877 | TGCGCGCGCTGT                                    | 84791 intergenic           |
| 1798159   | 1799618   | AAATGGCAGCGTTGTGGGTAAAATA                       | intergenic                 |
| 19772493  | 19777421  | AAATGCCCGTTAAAGCAAGAGCTCT                       | intronic antisense         |

|                         |              |                          |           |           |
|-------------------------|--------------|--------------------------|-----------|-----------|
| NM_001719               | BMP7         | bone morphogenetic -     | 55743808  | 55841707  |
| NM_001034173            | ALDH1L2      | mitochondrial 10-for-    | 105413561 | 105478341 |
| NM_001657               | AREG         | amphiregulin prepro+     | 75480628  | 75490485  |
| NM_001040445            | ASB1         | ankyrin repeat and S+    | 239335625 | 239360891 |
| 'ATCCCTGAACCAGGCCCAAATG |              |                          |           |           |
| NM_001104647            | SLC25A36     | solute carrier family 1+ | 140660661 | 140698785 |
| NM_018155               | SLC25A36     | solute carrier family 1+ | 140660661 | 140698785 |
| NM_001172509            | SATB2        | DNA-binding proteir-     | 200134222 | 200322819 |
| NM_001172517            | SATB2        | DNA-binding proteir-     | 200134222 | 200329831 |
| NM_015265               | SATB2        | DNA-binding proteir-     | 200134222 | 200335989 |
| ENST00000556973         | RP11-796G6.2 | Uncharacterized prot+    | 102196773 | 102198859 |
| NM_002570               | PCSK6        | proprotein convertas-    | 101844132 | 102030187 |
| NM_138319               | PCSK6        | proprotein convertas-    | 101844132 | 102030187 |
| NM_138320               | PCSK6        | proprotein convertas-    | 101853222 | 102030187 |
| NM_138321               | PCSK6        | proprotein convertas-    | 101853222 | 102030187 |
| NM_001012270            | BIRC5        | baculoviral IAP repe+    | 76210276  | 76221716  |
| NM_001012271            | BIRC5        | baculoviral IAP repe+    | 76210276  | 76221716  |
| NM_001168               | BIRC5        | baculoviral IAP repe+    | 76210276  | 76221716  |
| NM_001015050            | ALG1L        | putative glycosyltran-   | 125648117 | 125655887 |
| NM_001195223            | ALG1L        | putative glycosyltran-   | 125648117 | 125655887 |
| NM_032861               | SERAC1       | protein SERAC1 -         | 158530535 | 158589312 |
| NM_138689               | PPP1R14B     | protein phosphatase 1-   | 64011950  | 64014413  |
| NM_001040710            | FAM228A      | UPF0638 protein C2+      | 24397971  | 24414567  |
| NM_020458               | TTC7A        | tetratricopeptide repe+  | 47168312  | 47303275  |
| NM_001114331            | CLCN7        | H(+)/Cl(-) exchange -    | 1494933   | 1525085   |
| NM_001287               | CLCN7        | H(+)/Cl(-) exchange -    | 1494933   | 1525085   |
| NM_001003809            | DLGAP1       | disks large-associatex-  | 3496029   | 3845358   |
| NM_001242761            | DLGAP1       | disks large-associatex-  | 3502142   | 4455266   |
| NM_001242762            | DLGAP1       | disks large-associatex-  | 3496029   | 3874767   |
| NM_001242763            | DLGAP1       | disks large-associatex-  | 3496029   | 3874767   |
| NM_001242764            | DLGAP1       | disks large-associatex-  | 3496029   | 3874253   |
| NM_001242765            | DLGAP1       | disks large-associatex-  | 3502142   | 3845358   |
| NM_001242766            | DLGAP1       | disks large-associatex-  | 3496029   | 3845358   |
| NM_004746               | DLGAP1       | disks large-associatex-  | 3496029   | 4455266   |
| NM_001129778            | GRAPL        | GRB2-related adapte+     | 19030781  | 19062148  |
| NM_006636               | MTHFD2       | bifunctional methylei+   | 74425689  | 74442424  |
| NM_016248               | AKAP11       | A-kinase anchor prot+    | 42846288  | 42897403  |
| NM_001042594            | POT1         | protection of telomer-   | 124462439 | 124570037 |
| NM_015450               | POT1         | protection of telomer-   | 124462439 | 124570037 |
| NM_153208               | IQCK         | IQ domain-containin+     | 19727777  | 19868859  |

|             |             |           |           |           |            |
|-------------|-------------|-----------|-----------|-----------|------------|
| 31.943144   | 8.801272    | 4.589093  | 3.39348   | 25.121817 | 16.29239   |
| 122.090716  | 24.064187   | 6.352535  | 4.848405  | 95.141785 | 35.72408   |
| 155.301881  | 29.560438   | 6.492027  | 5.038521  | 256.28546 | 381.28278  |
| 2927.495167 | 927.784678  | 11.081976 | 10.045795 | 3192.9148 | 2738.542   |
| 28.079908   | 5.595856    | 4.460608  | 2.6289    | 21.358988 | 26.822145  |
| 422.65963   | 130.336066  | 8.304824  | 7.132131  | 331.12476 | 543.15576  |
| 63.165963   | 6.014121    | 5.181178  | 2.589144  | 37.435215 | 50.580456  |
| 18.849348   | 6.102893    | 3.883007  | 2.576924  | 19.802969 | 15.092369  |
| 63.220671   | 16.51944    | 5.59423   | 4.29141   | 76.58821  | 89.96494   |
| 40.96359    | 11.728291   | 5.01049   | 3.697329  | 44.53359  | 34.500988  |
| 40.96359    | 11.728291   | 5.01049   | 3.697329  | 44.53359  | 34.500988  |
| 635.23287   | 176.443806  | 8.907419  | 7.786391  | 722.501   | 737.3355   |
| 100.234502  | 22.29236    | 6.102678  | 4.614756  | 141.08636 | 106.11459  |
| 100.234502  | 22.29236    | 6.102678  | 4.614756  | 141.08636 | 106.11459  |
| 100.234502  | 22.29236    | 6.102678  | 4.614756  | 141.08636 | 106.11459  |
| 46.352078   | 10.466007   | 4.980345  | 3.570112  | 25.074202 | 13.62734   |
| 40.428752   | 5.980746    | 4.61923   | 2.693016  | 48.89009  | 102.62617  |
| 264.461605  | 70.505527   | 7.603491  | 6.343321  | 286.81595 | 152.87856  |
| 25.415237   | 5           | 4.146557  | 2.363479  | 37.937622 | 49.628048  |
| 25.415237   | 5           | 4.146557  | 2.363479  | 37.937622 | 49.628048  |
| 25.415237   | 5           | 4.146557  | 2.363479  | 37.937622 | 49.628048  |
| 25.415237   | 5           | 4.146557  | 2.363479  | 37.937622 | 49.628048  |
| 21.350672   | 6.176836    | 4.04418   | 2.697387  | 18.868134 | 13.46593   |
| 1875.5043   | 230.592033  | 10.450246 | 8.14935   | 2035.9879 | 2207.5007  |
| 1875.5043   | 230.592033  | 10.450246 | 8.14935   | 2035.9879 | 2207.5007  |
| 1875.5043   | 230.592033  | 10.450246 | 8.14935   | 2035.9879 | 2207.5007  |
| 79.337553   | 6.14564     | 5.659044  | 2.81536   | 88.23492  | 160.31157  |
| 97.509396   | 29.758567   | 6.176678  | 5.041272  | 155.01308 | 130.4139   |
| 10743.3985  | 1881.975993 | 12.767062 | 10.761907 | 12033.65  | 4629.5547  |
| 490.529527  | 140.040103  | 8.529723  | 7.35525   | 451.44937 | 559.66693  |
| 490.529527  | 140.040103  | 8.529723  | 7.35525   | 451.44937 | 559.66693  |
| 82.229612   | 20.041479   | 5.921204  | 4.553054  | 75.58969  | 63.182243  |
| 92.775414   | 25.986782   | 6.036819  | 4.878177  | 106.7912  | 130.55272  |
| 40.564441   | 6.537911    | 4.621265  | 2.83807   | 61.13047  | 89.75235   |
| 23.753667   | 7.559064    | 4.186589  | 2.953935  | 34.50448  | 33.29757   |
| 122.025444  | 17.6574     | 6.492372  | 4.323233  | 159.93501 | 84.019905  |
| 3167.905133 | 972.13235   | 11.200222 | 10.16913  | 3251.1765 | 3184.8645  |
| 140.149573  | 27.559284   | 6.496347  | 4.96243   | 164.87236 | 273.76172  |
| 16.349766   | 5.908041    | 3.715785  | 2.673206  | 14.201421 | 14.6313715 |
| 141.608872  | 38.907483   | 6.770527  | 5.44725   | 165.89449 | 133.05998  |
| 141.608872  | 38.907483   | 6.770527  | 5.44725   | 165.89449 | 133.05998  |
| 42.641376   | 8.908871    | 4.748271  | 3.205162  | 26.977674 | 46.013046  |
| 57.20224    | 7.611911    | 5.289484  | 3.05085   | 56.11313  | 34.4077    |
| 57.20224    | 7.611911    | 5.289484  | 3.05085   | 56.11313  | 34.4077    |
| 57.20224    | 7.611911    | 5.289484  | 3.05085   | 56.11313  | 34.4077    |
| 57.20224    | 7.611911    | 5.289484  | 3.05085   | 56.11313  | 34.4077    |
| 57.20224    | 7.611911    | 5.289484  | 3.05085   | 56.11313  | 34.4077    |
| 57.20224    | 7.611911    | 5.289484  | 3.05085   | 56.11313  | 34.4077    |
| 57.20224    | 7.611911    | 5.289484  | 3.05085   | 56.11313  | 34.4077    |
| 57.20224    | 7.611911    | 5.289484  | 3.05085   | 56.11313  | 34.4077    |
| 64.817301   | 7.032902    | 5.558501  | 2.785415  | 45.317234 | 23.33662   |
| 27.963069   | 7.529922    | 4.437331  | 3.139892  | 33.879936 | 33.759583  |
| 45.862884   | 12.574139   | 5.144809  | 3.722293  | 55.37169  | 65.95664   |
| 128.079212  | 42.251235   | 6.611771  | 4.847294  | 160.04532 | 137.71985  |
| 82.044851   | 15.626574   | 5.809489  | 3.517358  | 96.1079   | 31.698442  |
| 91.171504   | 27.218785   | 6.105904  | 5.052011  | 84.6303   | 61.011158  |
| 91.171504   | 27.218785   | 6.105904  | 5.052011  | 84.6303   | 61.011158  |
| 64.863195   | 17.109346   | 5.44791   | 4.358031  | 88.23384  | 34.64473   |
| 17.860698   | 6.307253    | 3.819734  | 2.698522  | 20.67651  | 14.485071  |
| 15.236412   | 5.761828    | 3.612376  | 2.588362  | 17.093569 | 13.873999  |
| 37.24586    | 9.12996     | 4.595325  | 3.452845  | 15.60716  | 17.181433  |
| 37.500444   | 12.223138   | 4.88742   | 3.863916  | 46.543194 | 34.90132   |

|           |            |            |           |           |            |
|-----------|------------|------------|-----------|-----------|------------|
| 22.358536 | 48.27478   | 31.55634   | 48.055    | 7.0696597 | 6.48841    |
| 133.19868 | 64.82521   | 211.49254  | 192.162   | 18.163101 | 19.02207   |
| 60.274204 | 111.46438  | 42.682114  | 79.82235  | 33.195713 | 55.94402   |
| 3621.6743 | 2612.0098  | 2237.7014  | 3162.1287 | 1144.092  | 486.05713  |
| 19.511013 | 33.64427   | 30.389256  | 36.753777 | 4.9999995 | 6.2782946  |
| 417.72495 | 267.76367  | 499.03574  | 477.1529  | 137.47168 | 56.37312   |
| 10.021261 | 158.79628  | 30.666588  | 91.49598  | 11.084731 | 4.9999995  |
| 28.01645  | 13.26744   | 20.085136  | 16.831724 | 4.9999995 | 4.9999995  |
| 41.405235 | 56.884106  | 50.98825   | 63.493282 | 19.204441 | 15.869531  |
| 46.305958 | 54.17527   | 25.654991  | 40.610744 | 17.32765  | 6.705357   |
| 46.305958 | 54.17527   | 25.654991  | 40.610744 | 17.32765  | 6.705357   |
| 672.2703  | 447.28568  | 584.8795   | 647.12524 | 158.35193 | 118.789925 |
| 167.97179 | 31.084967  | 76.91985   | 78.229454 | 16.27931  | 10.100369  |
| 167.97179 | 31.084967  | 76.91985   | 78.229454 | 16.27931  | 10.100369  |
| 167.97179 | 31.084967  | 76.91985   | 78.229454 | 16.27931  | 10.100369  |
| 30.072884 | 72.53946   | 59.28897   | 77.50961  | 8.2703705 | 13.394489  |
| 9.595249  | 22.285568  | 24.839626  | 34.33581  | 4.9999995 | 10.696641  |
| 421.94775 | 169.84859  | 260.0192   | 295.25958 | 98.45247  | 47.092068  |
| 14.530311 | 20.450848  | 10.969951  | 18.974642 | 4.9999995 | 4.9999995  |
| 14.530311 | 20.450848  | 10.969951  | 18.974642 | 4.9999995 | 4.9999995  |
| 14.530311 | 20.450848  | 10.969951  | 18.974642 | 4.9999995 | 4.9999995  |
| 14.530311 | 20.450848  | 10.969951  | 18.974642 | 4.9999995 | 4.9999995  |
| 16.22613  | 19.889318  | 26.582129  | 33.07239  | 6.865143  | 4.9999995  |
| 1748.7289 | 1459.9291  | 1784.9928  | 2015.8864 | 214.81609 | 102.40021  |
| 1748.7289 | 1459.9291  | 1784.9928  | 2015.8864 | 214.81609 | 102.40021  |
| 1748.7289 | 1459.9291  | 1784.9928  | 2015.8864 | 214.81609 | 102.40021  |
| 16.368587 | 49.460888  | 66.949394  | 94.69996  | 6.580181  | 7.83813    |
| 69.579124 | 61.64359   | 86.3883    | 82.01838  | 27.264772 | 16.63969   |
| 18310.545 | 3676.6843  | 13611.876  | 12198.081 | 1400.3469 | 307.27686  |
| 330.644   | 595.65466  | 437.5925   | 568.1697  | 83.88746  | 119.90019  |
| 330.644   | 595.65466  | 437.5925   | 568.1697  | 83.88746  | 119.90019  |
| 68.972404 | 44.21208   | 109.457695 | 131.96356 | 25.811104 | 33.99807   |
| 84.95149  | 29.545143  | 112.22649  | 92.58544  | 25.75367  | 17.192327  |
| 17.133575 | 38.658     | 7.8810525  | 28.831198 | 5.948466  | 11.334719  |
| 18.544588 | 24.857416  | 15.0888405 | 16.22911  | 8.88539   | 4.9999995  |
| 205.48775 | 77.62398   | 91.88322   | 113.2028  | 19.045572 | 28.69784   |
| 3997.475  | 2436.8667  | 2894.3132  | 3242.7349 | 1192.0962 | 593.6134   |
| 55.981865 | 181.18628  | 38.43719   | 126.65802 | 21.099705 | 48.635895  |
| 13.962341 | 21.772234  | 15.08707   | 18.444157 | 5.7765727 | 4.9999995  |
| 184.5309  | 109.54738  | 112.71457  | 143.90591 | 48.63681  | 14.01082   |
| 184.5309  | 109.54738  | 112.71457  | 143.90591 | 48.63681  | 14.01082   |
| 4.9999995 | 43.572437  | 66.47658   | 67.80852  | 4.9999995 | 5.826825   |
| 59.05526  | 17.840769  | 94.31272   | 81.483864 | 8.090139  | 4.9999995  |
| 59.05526  | 17.840769  | 94.31272   | 81.483864 | 8.090139  | 4.9999995  |
| 59.05526  | 17.840769  | 94.31272   | 81.483864 | 8.090139  | 4.9999995  |
| 59.05526  | 17.840769  | 94.31272   | 81.483864 | 8.090139  | 4.9999995  |
| 59.05526  | 17.840769  | 94.31272   | 81.483864 | 8.090139  | 4.9999995  |
| 59.05526  | 17.840769  | 94.31272   | 81.483864 | 8.090139  | 4.9999995  |
| 59.05526  | 17.840769  | 94.31272   | 81.483864 | 8.090139  | 4.9999995  |
| 59.05526  | 17.840769  | 94.31272   | 81.483864 | 8.090139  | 4.9999995  |
| 59.05526  | 17.840769  | 94.31272   | 81.483864 | 8.090139  | 4.9999995  |
| 59.05526  | 17.840769  | 94.31272   | 81.483864 | 8.090139  | 4.9999995  |
| 59.645058 | 80.17873   | 81.80372   | 98.622444 | 4.9999995 | 4.9999995  |
| 33.198215 | 17.429518  | 26.055948  | 23.455217 | 6.600071  | 5.2534842  |
| 32.166664 | 41.22252   | 42.44392   | 38.01587  | 14.469659 | 5.479945   |
| 123.53269 | 75.485504  | 139.33691  | 132.355   | 72.357666 | 8.009714   |
| 160.65979 | 93.014725  | 31.194208  | 79.59404  | 19.132988 | 4.9999995  |
| 77.13067  | 126.971664 | 60.852703  | 136.43253 | 24.565891 | 25.846668  |
| 77.13067  | 126.971664 | 60.852703  | 136.43253 | 24.565891 | 25.846668  |
| 146.81271 | 55.52984   | 26.113314  | 37.844734 | 13.667359 | 13.75052   |
| 20.209827 | 13.2429695 | 16.29336   | 22.256449 | 5.5300894 | 4.9999995  |
| 19.555101 | 15.43681   | 11.93129   | 13.5277   | 6.5748906 | 4.9999995  |
| 13.765881 | 49.885666  | 67.78523   | 59.24979  | 6.3745236 | 7.7298527  |
| 26.523844 | 46.35514   | 40.05256   | 30.626608 | 8.185054  | 10.38592   |

|           |            |            |           |           |           |
|-----------|------------|------------|-----------|-----------|-----------|
| 11.866691 | 8.79231    | 8.22697    | 10.363592 | 4.1914296 | 4.040421  |
| 27.676805 | 39.350376  | 17.935728  | 22.237043 | 6.125025  | 5.0705757 |
| 20.883617 | 33.38439   | 10.7752495 | 23.17964  | 7.5444484 | 8.285212  |
| 1987.9485 | 488.2014   | 887.9575   | 572.45154 | 11.167049 | 11.005357 |
| 4.9999995 | 7.296844   | 4.9999995  | 4.9999995 | 3.9568033 | 4.692999  |
| 315.6636  | 84.81764   | 98.941956  | 88.7484   | 7.915357  | 8.774788  |
| 4.9999995 | 4.9999995  | 4.9999995  | 4.9999995 | 4.7607245 | 5.526905  |
| 11.61736  | 4.9999995  | 4.9999995  | 4.9999995 | 3.8478281 | 3.9375293 |
| 18.79021  | 20.54204   | 16.39612   | 8.314298  | 5.804283  | 6.2878036 |
| 18.682926 | 13.24275   | 8.501823   | 5.909238  | 5.0200667 | 5.02645   |
| 18.682926 | 13.24275   | 8.501823   | 5.909238  | 5.0200667 | 5.02645   |
| 209.37553 | 162.93074  | 248.91994  | 160.29477 | 9.028195  | 9.202325  |
| 24.947393 | 12.9894495 | 41.426907  | 28.010729 | 6.689171  | 6.512019  |
| 24.947393 | 12.9894495 | 41.426907  | 28.010729 | 6.689171  | 6.512019  |
| 24.947393 | 12.9894495 | 41.426907  | 28.010729 | 6.689171  | 6.512019  |
| 4.9999995 | 17.22887   | 7.6898236  | 11.21249  | 4.1884904 | 3.8059404 |
| 4.9999995 | 5.1878376  | 4.9999995  | 4.9999995 | 5.151762  | 6.467302  |
| 125.3224  | 44.31626   | 63.282246  | 44.56772  | 7.7080994 | 7.0183516 |
| 4.9999995 | 4.9999995  | 4.9999995  | 4.9999995 | 4.7813497 | 5.4998183 |
| 4.9999995 | 4.9999995  | 4.9999995  | 4.9999995 | 4.7813497 | 5.4998183 |
| 4.9999995 | 4.9999995  | 4.9999995  | 4.9999995 | 4.7813497 | 5.4998183 |
| 4.9999995 | 4.9999995  | 4.9999995  | 4.9999995 | 4.7813497 | 5.4998183 |
| 4.9999995 | 4.9999995  | 4.9999995  | 4.9999995 | 4.7813497 | 5.4998183 |
| 8.382483  | 6.813392   | 4.9999995  | 4.9999995 | 3.7756088 | 3.7913766 |
| 298.1072  | 253.25133  | 277.61752  | 237.35985 | 10.508357 | 10.692127 |
| 298.1072  | 253.25133  | 277.61752  | 237.35985 | 10.508357 | 10.692127 |
| 298.1072  | 253.25133  | 277.61752  | 237.35985 | 10.508357 | 10.692127 |
| 4.9999995 | 4.9999995  | 7.4555326  | 4.9999995 | 6.010209  | 7.081414  |
| 65.50203  | 22.042871  | 25.08729   | 22.014751 | 6.818631  | 6.7945495 |
| 2452.8777 | 491.1223   | 4502.6675  | 2137.5647 | 13.11075  | 11.737667 |
| 58.65279  | 210.38742  | 197.65701  | 169.75575 | 8.343381  | 8.817958  |
| 58.65279  | 210.38742  | 197.65701  | 169.75575 | 8.343381  | 8.817958  |
| 12.902031 | 15.19393   | 16.597412  | 15.74633  | 5.7862334 | 5.812722  |
| 43.08248  | 13.484072  | 36.445595  | 19.962547 | 6.29234   | 6.7961006 |
| 4.9999995 | 6.9442806  | 4.9999995  | 4.9999995 | 5.4756737 | 6.2837324 |
| 13.66345  | 6.171361   | 4.9999995  | 6.634186  | 4.646934  | 4.981494  |
| 5.8831573 | 23.103878  | 12.0722    | 17.14175  | 6.8625493 | 6.198168  |
| 1963.9685 | 741.347    | 740.3465   | 601.4225  | 11.191627 | 11.221441 |
| 12.18321  | 40.51312   | 16.69909   | 26.224684 | 6.907239  | 7.830685  |
| 7.7320857 | 4.9999995  | 6.9395885  | 4.9999995 | 3.3561351 | 3.8961308 |
| 67.516    | 31.983452  | 39.70916   | 31.588657 | 6.9163547 | 6.823198  |
| 67.516    | 31.983452  | 39.70916   | 31.588657 | 6.9163547 | 6.823198  |
| 4.9999995 | 20.889389  | 7.865444   | 8.871566  | 4.2985954 | 5.4006066 |
| 8.189777  | 5.100463   | 12.27793   | 7.013155  | 5.3471713 | 5.0236588 |
| 8.189777  | 5.100463   | 12.27793   | 7.013155  | 5.3471713 | 5.0236588 |
| 8.189777  | 5.100463   | 12.27793   | 7.013155  | 5.3471713 | 5.0236588 |
| 8.189777  | 5.100463   | 12.27793   | 7.013155  | 5.3471713 | 5.0236588 |
| 8.189777  | 5.100463   | 12.27793   | 7.013155  | 5.3471713 | 5.0236588 |
| 8.189777  | 5.100463   | 12.27793   | 7.013155  | 5.3471713 | 5.0236588 |
| 8.189777  | 5.100463   | 12.27793   | 7.013155  | 5.3471713 | 5.0236588 |
| 8.189777  | 5.100463   | 12.27793   | 7.013155  | 5.3471713 | 5.0236588 |
| 4.9999995 | 4.9999995  | 15.35282   | 6.844592  | 5.043401  | 4.5011563 |
| 7.7514534 | 12.997469  | 5.5804863  | 6.996571  | 4.6196284 | 4.998079  |
| 24.377996 | 16.681667  | 5.2899356  | 9.14563   | 5.3253365 | 5.8697395 |
| 132.5672  | 16.828447  | 9.765343   | 13.97904  | 6.863506  | 6.8762584 |
| 46.98487  | 4.9999995  | 12.641589  | 4.9999995 | 6.138674  | 4.913529  |
| 16.346249 | 37.779846  | 33.023     | 25.751057 | 5.949608  | 5.769944  |
| 16.346249 | 37.779846  | 33.023     | 25.751057 | 5.949608  | 5.769944  |
| 22.852798 | 12.894908  | 19.3293    | 20.161192 | 6.010092  | 5.0318465 |
| 10.266488 | 7.046941   | 4.9999995  | 4.9999995 | 3.9096634 | 3.8795578 |
| 7.996077  | 4.9999995  | 4.9999995  | 4.9999995 | 3.622942  | 3.8270633 |
| 9.891688  | 12.009472  | 9.739136   | 9.035088  | 3.4913578 | 4.108164  |
| 8.560635  | 16.686636  | 14.24089   | 15.279691 | 5.082461  | 5.041581  |



|           |           |           |            |           |           |
|-----------|-----------|-----------|------------|-----------|-----------|
| 4.1697717 | 5.1966147 | 4.837557  | 5.0987654  | 3.0156307 | 3.4530287 |
| 6.731858  | 5.6466036 | 7.482416  | 7.058729   | 4.4185843 | 5.073177  |
| 5.6022563 | 6.457069  | 5.2575397 | 5.8056364  | 5.2834845 | 6.659038  |
| 11.459146 | 11.005357 | 10.837766 | 11.0171795 | 10.460816 | 9.789701  |
| 3.9645047 | 4.6300178 | 4.78409   | 4.7352324  | 2.3467326 | 3.401673  |
| 8.363289  | 7.7466054 | 8.705725  | 8.323177   | 7.3300815 | 6.6716013 |
| 3.0137167 | 6.9909477 | 4.797777  | 5.996995   | 3.7007189 | 2.4279919 |
| 4.499286  | 3.1354063 | 4.227489  | 3.6505048  | 2.3467326 | 2.4279919 |
| 5.053482  | 5.4454794 | 5.4945555 | 5.479774   | 4.500871  | 4.8064885 |
| 5.2123337 | 5.3721776 | 4.564861  | 4.867053   | 4.353104  | 3.5049899 |
| 5.2123337 | 5.3721776 | 4.564861  | 4.867053   | 4.353104  | 3.5049899 |
| 9.028195  | 8.495712  | 8.93032   | 8.759766   | 7.5512576 | 7.739751  |
| 7.061634  | 4.513941  | 6.060962  | 5.7783403  | 4.2569375 | 4.118314  |
| 7.061634  | 4.513941  | 6.060962  | 5.7783403  | 4.2569375 | 4.118314  |
| 7.061634  | 4.513941  | 6.060962  | 5.7783403  | 4.2569375 | 4.118314  |
| 4.602726  | 5.819184  | 5.6998444 | 5.7658873  | 3.2536128 | 4.5470037 |
| 2.953177  | 3.9799414 | 4.5212617 | 4.641938   | 2.3467326 | 4.2087736 |
| 8.37692   | 7.078644  | 7.7807927 | 7.6581407  | 6.8546376 | 6.4059496 |
| 3.5361571 | 3.8350055 | 3.4089556 | 3.8180535  | 2.3467326 | 2.4279919 |
| 3.5361571 | 3.8350055 | 3.4089556 | 3.8180535  | 2.3467326 | 2.4279919 |
| 3.5361571 | 3.8350055 | 3.4089556 | 3.8180535  | 2.3467326 | 2.4279919 |
| 3.5361571 | 3.8350055 | 3.4089556 | 3.8180535  | 2.3467326 | 2.4279919 |
| 3.7031064 | 3.7917395 | 4.6114135 | 4.5918374  | 2.9768457 | 2.4279919 |
| 10.409206 | 10.194751 | 10.504383 | 10.39265   | 7.9944077 | 7.5288925 |
| 10.409206 | 10.194751 | 10.504383 | 10.39265   | 7.9944077 | 7.5288925 |
| 10.409206 | 10.194751 | 10.504383 | 10.39265   | 7.9944077 | 7.5288925 |
| 3.7149806 | 5.2370453 | 5.864888  | 6.04573    | 2.9151864 | 3.735219  |
| 5.810545  | 5.5699444 | 6.2267313 | 5.8396645  | 5.0065136 | 4.8723693 |
| 13.904315 | 11.498745 | 13.417522 | 12.933375  | 10.738141 | 9.123176  |
| 8.0353    | 8.89571   | 8.514295  | 8.567831   | 6.615508  | 7.7518415 |
| 8.0353    | 8.89571   | 8.514295  | 8.567831   | 6.615508  | 7.7518415 |
| 5.7969284 | 5.055658  | 6.558033  | 6.517649   | 4.93216   | 5.9266467 |
| 6.0921493 | 4.430452  | 6.595354  | 6.0145164  | 4.930354  | 4.924103  |
| 3.7794375 | 4.8463974 | 2.949308  | 4.393042   | 2.7757387 | 4.2939744 |
| 3.8936048 | 4.15622   | 3.8419373 | 3.599344   | 3.3659308 | 2.4279919 |
| 7.3672194 | 5.9159765 | 6.310869  | 6.29945    | 4.4873343 | 5.680401  |
| 11.610452 | 10.915692 | 11.214177 | 11.047943  | 10.518034 | 10.069458 |
| 5.4916573 | 7.1781096 | 5.1105514 | 6.4598413  | 4.6378922 | 6.4514074 |
| 3.4768379 | 3.9419389 | 3.8417947 | 3.7818747  | 2.7301795 | 2.4279919 |
| 7.206245  | 6.4299316 | 6.601903  | 6.645529   | 5.8374357 | 4.6189504 |
| 7.206245  | 6.4299316 | 6.601903  | 6.645529   | 5.8374357 | 4.6189504 |
| 2.3258038 | 5.0347667 | 5.8557734 | 5.5740805  | 2.3467326 | 3.2829602 |
| 5.5712175 | 3.6156893 | 6.347694  | 5.8314757  | 3.2183049 | 2.4279919 |
| 5.5712175 | 3.6156893 | 6.347694  | 5.8314757  | 3.2183049 | 2.4279919 |
| 5.5712175 | 3.6156893 | 6.347694  | 5.8314757  | 3.2183049 | 2.4279919 |
| 5.5712175 | 3.6156893 | 6.347694  | 5.8314757  | 3.2183049 | 2.4279919 |
| 5.5712175 | 3.6156893 | 6.347694  | 5.8314757  | 3.2183049 | 2.4279919 |
| 5.5712175 | 3.6156893 | 6.347694  | 5.8314757  | 3.2183049 | 2.4279919 |
| 5.5712175 | 3.6156893 | 6.347694  | 5.8314757  | 3.2183049 | 2.4279919 |
| 5.5712175 | 3.6156893 | 6.347694  | 5.8314757  | 3.2183049 | 2.4279919 |
| 5.5712175 | 3.6156893 | 6.347694  | 5.8314757  | 3.2183049 | 2.4279919 |
| 5.5712175 | 3.6156893 | 6.347694  | 5.8314757  | 3.2183049 | 2.4279919 |
| 5.5862265 | 5.966366  | 6.1504903 | 6.103363   | 2.3467326 | 2.4279919 |
| 4.7396126 | 3.578799  | 4.585051  | 4.1028185  | 2.9190226 | 3.1231673 |
| 4.6950574 | 4.9497857 | 5.2495847 | 4.7793493  | 4.084797  | 3.1915407 |
| 6.6284337 | 5.8786163 | 6.9021025 | 6.521708   | 6.4078817 | 3.766464  |
| 6.993594  | 6.186941  | 4.8225617 | 5.801633   | 4.494563  | 2.4279919 |
| 5.9537373 | 6.6586704 | 5.7370043 | 6.566458   | 4.860613  | 5.5260644 |
| 5.9537373 | 6.6586704 | 5.7370043 | 6.566458   | 4.860613  | 5.5260644 |
| 6.872517  | 5.412138  | 4.5876474 | 4.773218   | 3.9999266 | 4.585132  |
| 4.0167656 | 3.131978  | 3.9497054 | 4.0307317  | 2.6682644 | 2.4279919 |
| 3.9683623 | 3.3856626 | 3.5220854 | 3.3481388  | 2.9135373 | 2.4279919 |
| 3.4564526 | 5.2476974 | 5.883565  | 5.384713   | 2.8711395 | 3.7127137 |
| 4.4181757 | 5.132658  | 5.164806  | 4.4848375  | 3.2367938 | 4.161701  |

|           |           |           |           |
|-----------|-----------|-----------|-----------|
| 3.657897  | 3.2348557 | 3.3350792 | 3.6643894 |
| 4.81032   | 5.5346456 | 4.4356217 | 4.8180795 |
| 4.42505   | 5.27702   | 3.7070186 | 4.8795123 |
| 10.89951  | 9.379478  | 10.039968 | 9.705296  |
| 2.350709  | 2.9597204 | 2.3618152 | 2.352752  |
| 8.251027  | 6.737011  | 6.884366  | 6.9186983 |
| 2.350709  | 2.3408759 | 2.3618152 | 2.352752  |
| 3.6313791 | 2.3408759 | 2.3618152 | 2.352752  |
| 4.2813272 | 4.5227823 | 4.308839  | 3.3281515 |
| 4.2730446 | 3.8483925 | 3.380406  | 2.8240397 |
| 4.2730446 | 3.8483925 | 3.380406  | 2.8240397 |
| 7.6604695 | 7.72336   | 8.217877  | 7.825628  |
| 4.6661053 | 3.8189805 | 5.6458116 | 5.1823874 |
| 4.6661053 | 3.8189805 | 5.6458116 | 5.1823874 |
| 4.6661053 | 3.8189805 | 5.6458116 | 5.1823874 |
| 2.350709  | 4.2497716 | 3.2380939 | 3.7814782 |
| 2.350709  | 2.5373118 | 2.3618152 | 2.352752  |
| 6.9309874 | 5.7197704 | 6.2487144 | 5.899867  |
| 2.350709  | 2.3408759 | 2.3618152 | 2.352752  |
| 2.350709  | 2.3408759 | 2.3618152 | 2.352752  |
| 2.350709  | 2.3408759 | 2.3618152 | 2.352752  |
| 2.350709  | 2.3408759 | 2.3618152 | 2.352752  |
| 3.1978693 | 2.8670468 | 2.3618152 | 2.352752  |
| 8.166046  | 8.414114  | 8.367121  | 8.425516  |
| 8.166046  | 8.414114  | 8.367121  | 8.425516  |
| 8.166046  | 8.414114  | 8.367121  | 8.425516  |
| 2.350709  | 2.3408759 | 3.1974163 | 2.352752  |
| 6.0136633 | 4.631938  | 4.920095  | 4.803054  |
| 11.218254 | 9.389385  | 12.426967 | 11.675521 |
| 5.860408  | 8.122254  | 7.873806  | 7.9076834 |
| 5.860408  | 8.122254  | 7.873806  | 7.9076834 |
| 3.7684033 | 4.0650077 | 4.328889  | 4.297219  |
| 5.424624  | 3.8768017 | 5.462109  | 4.651068  |
| 2.350709  | 2.8934298 | 2.3618152 | 2.352752  |
| 3.8456671 | 2.7300053 | 2.3618152 | 2.9922    |
| 2.7674325 | 4.709099  | 3.8722668 | 4.4228673 |
| 10.880179 | 10.003172 | 9.759966  | 9.78397   |
| 3.6937294 | 5.5782995 | 4.3367057 | 5.076545  |
| 3.0916831 | 2.3408759 | 3.0957508 | 2.352752  |
| 6.0573835 | 5.2101164 | 5.582863  | 5.3767533 |
| 6.0573835 | 5.2101164 | 5.582863  | 5.3767533 |
| 2.350709  | 4.551494  | 3.2700584 | 3.4290152 |
| 3.1663814 | 2.5246897 | 3.895083  | 3.0726476 |
| 3.1663814 | 2.5246897 | 3.895083  | 3.0726476 |
| 3.1663814 | 2.5246897 | 3.895083  | 3.0726476 |
| 3.1663814 | 2.5246897 | 3.895083  | 3.0726476 |
| 3.1663814 | 2.5246897 | 3.895083  | 3.0726476 |
| 3.1663814 | 2.5246897 | 3.895083  | 3.0726476 |
| 3.1663814 | 2.5246897 | 3.895083  | 3.0726476 |
| 3.1663814 | 2.5246897 | 3.895083  | 3.0726476 |
| 2.350709  | 2.3408759 | 4.2142487 | 3.031933  |
| 3.0947804 | 3.8198743 | 2.8144748 | 3.068034  |
| 4.6320844 | 4.2033253 | 2.7486336 | 3.473377  |
| 7.007196  | 4.2144294 | 3.5688038 | 4.1189904 |
| 5.552823  | 2.3408759 | 3.9351397 | 2.352752  |
| 4.091229  | 5.4721494 | 5.315744  | 5.046267  |
| 4.091229  | 5.4721494 | 5.315744  | 5.046267  |
| 4.5458055 | 3.8079543 | 4.539034  | 4.670334  |
| 3.4672792 | 2.9130266 | 2.3618152 | 2.352752  |
| 3.133201  | 2.3408759 | 2.3618152 | 2.352752  |
| 3.412644  | 3.6982055 | 3.5659158 | 3.4564526 |
| 3.2231522 | 4.203589  | 4.1042857 | 4.253972  |

|               |             |             |           |    |           |
|---------------|-------------|-------------|-----------|----|-----------|
| ASHGA5P019880 | 0.019508343 | 0.085195149 | 2.6045077 | up | noncoding |
| ASHGA5P037006 | 0.000836243 | 0.019402866 | 3.691863  | up | noncoding |
| ASHGA5P055788 | 0.001437556 | 0.025364577 | 3.4138215 | up | noncoding |
| ASHGA5P047936 | 0.018308108 | 0.082097163 | 2.1654    | up | noncoding |
| ASHGA5P017104 | 0.007596301 | 0.05476971  | 3.2196926 | up | noncoding |
| ASHGA5P032141 | 0.040638174 | 0.12894705  | 3.018057  | up | noncoding |
| ASHGA5P032141 | 0.040638174 | 0.12894705  | 3.018057  | up | noncoding |
| ASHGA5P032141 | 0.040638174 | 0.12894705  | 3.018057  | up | noncoding |
| ASHGA5P032141 | 0.040638174 | 0.12894705  | 3.018057  | up | noncoding |
| ASHGA5P032141 | 0.040638174 | 0.12894705  | 3.018057  | up | noncoding |
| ASHGA5P032141 | 0.040638174 | 0.12894705  | 3.018057  | up | noncoding |
| ASHGA5P035476 | 1.28197E-05 | 0.004261616 | 4.149326  | up | noncoding |
| ASHGA5P021643 | 8.3724E-05  | 0.008738697 | 3.0085869 | up | noncoding |
| ASHGA5P021643 | 8.3724E-05  | 0.008738697 | 3.0085869 | up | noncoding |
| ASHGA5P021643 | 8.3724E-05  | 0.008738697 | 3.0085869 | up | noncoding |
| ASHGA5P049357 | 0.002921466 | 0.034973658 | 2.2062401 | up | noncoding |
| ASHGA5P030199 | 0.007730954 | 0.055191161 | 3.0049499 | up | noncoding |
| ASHGA5P025755 | 0.022622456 | 0.093083856 | 2.0327277 | up | noncoding |
| ASHGA5P025755 | 0.022622456 | 0.093083856 | 2.0327277 | up | noncoding |
| ASHGA5P025755 | 0.022622456 | 0.093083856 | 2.0327277 | up | noncoding |
| ASHGA5P025755 | 0.022622456 | 0.093083856 | 2.0327277 | up | noncoding |
| ASHGA5P025755 | 0.022622456 | 0.093083856 | 2.0327277 | up | noncoding |
| ASHGA5P025755 | 0.022622456 | 0.093083856 | 2.0327277 | up | noncoding |
| ASHGA5P029341 | 0.008012821 | 0.056265282 | 2.0716439 | up | noncoding |
| ASHGA5P015864 | 4.94512E-05 | 0.007378879 | 2.2000951 | up | noncoding |
| ASHGA5P027229 | 0.002191478 | 0.030784944 | 3.7135157 | up | noncoding |
| ASHGA5P017082 | 0.00064467  | 0.017062064 | 4.6883867 | up | noncoding |
| ASHGA5P023152 | 0.013118115 | 0.070080694 | 3.4166505 | up | noncoding |
| ASHGA5P031100 | 0.008095374 | 0.056581181 | 2.048235  | up | noncoding |
| ASHGA5P020049 | 0.003789109 | 0.039485661 | 2.2115283 | up | noncoding |
| ASHGA5P017704 | 0.000185099 | 0.01146874  | 2.3835254 | up | noncoding |
| ASHGA5P017704 | 0.000185099 | 0.01146874  | 2.3835254 | up | noncoding |
| ASHGA5P017704 | 0.000185099 | 0.01146874  | 2.3835254 | up | noncoding |
| ASHGA5P033150 | 0.000832534 | 0.019383269 | 2.4564602 | up | noncoding |
| ASHGA5P037185 | 0.005743068 | 0.048164708 | 2.9573699 | up | noncoding |
| ASHGA5P033152 | 1.21955E-05 | 0.004221854 | 2.224938  | up | noncoding |
| ASHGA5P000456 | 0.043996109 | 0.134664659 | 2.0681541 | up | noncoding |
| ASHGA5P029713 | 0.000147524 | 0.01076444  | 4.546374  | up | noncoding |
| ASHGA5P053031 | 0.000374351 | 0.013880988 | 2.0500429 | up | noncoding |
| ASHGA5P017425 | 0.008192387 | 0.056791621 | 3.4336599 | up | noncoding |
| ASHGA5P017425 | 0.008192387 | 0.056791621 | 3.4336599 | up | noncoding |
| ASHGA5P017425 | 0.008192387 | 0.056791621 | 3.4336599 | up | noncoding |
| ASHGA5P017425 | 0.008192387 | 0.056791621 | 3.4336599 | up | noncoding |
| ASHGA5P017425 | 0.008192387 | 0.056791621 | 3.4336599 | up | noncoding |
| ASHGA5P017425 | 0.008192387 | 0.056791621 | 3.4336599 | up | noncoding |
| ASHGA5P017425 | 0.008192387 | 0.056791621 | 3.4336599 | up | noncoding |
| ASHGA5P017425 | 0.008192387 | 0.056791621 | 3.4336599 | up | noncoding |
| ASHGA5P017425 | 0.008192387 | 0.056791621 | 3.4336599 | up | noncoding |
| ASHGA5P017425 | 0.008192387 | 0.056791621 | 3.4336599 | up | noncoding |
| ASHGA5P017425 | 0.008192387 | 0.056791621 | 3.4336599 | up | noncoding |
| ASHGA5P017425 | 0.008192387 | 0.056791621 | 3.4336599 | up | noncoding |
| ASHGA5P017425 | 0.008192387 | 0.056791621 | 3.4336599 | up | noncoding |
| ASHGA5P017425 | 0.008192387 | 0.056791621 | 3.4336599 | up | noncoding |
| ASHGA5P017425 | 0.008192387 | 0.056791621 | 3.4336599 | up | noncoding |
| ASHGA5P022693 | 0.000201761 | 0.01146874  | 3.4171314 | up | noncoding |
| ASHGA5P056739 | 0.017709072 | 0.08079239  | 2.0413415 | up | noncoding |
| ASHGA5P057525 | 0.038726874 | 0.125317529 | 2.1486131 | up | noncoding |
| ASHGA5P057377 | 0.022866477 | 0.093657324 | 2.0095245 | up | noncoding |
| ASHGA5P054732 | 0.031373871 | 0.111265481 | 3.9812204 | up | noncoding |
| ASHGA5P021001 | 9.6664E-05  | 0.009080764 | 2.9457354 | up | noncoding |
| ASHGA5P000046 | 0.002892044 | 0.034821141 | 2.1423387 | up | noncoding |
| ASHGA5P020462 | 0.009235789 | 0.059806719 | 3.0259671 | up | noncoding |
| ASHGA5P054543 | 9.41694E-05 | 0.009080764 | 3.6029786 | up | noncoding |
| ASHGA5P022529 | 0.000108194 | 0.009526401 | 4.7963127 | up | noncoding |
| ASHGA5P053146 | 0.012181829 | 0.067588007 | 2.0365217 | up | noncoding |

|                    |                    |                     |       |       |   |
|--------------------|--------------------|---------------------|-------|-------|---|
| ENST00000504620    | CTC-806A22.1       | GENCODE             | 530   | chr5  | - |
| ENST00000565390    | RP1-228H13.5       | GENCODE             | 2446  | chr1  | + |
| uc001vdy.3         | DLEU2              | UCSC_knowngene      | 1279  | chr13 | - |
| ENST00000532541    | CTC-497E21.4       | GENCODE             | 1124  | chr11 | - |
| ENST00000437707    | RP11-271I.4        | GENCODE             | 430   | chr9  | + |
| ENST00000571370    | RP11-199F11.2      | GENCODE             | 1112  | chr17 | - |
| ENST00000571370    | RP11-199F11.2      | GENCODE             | 1112  | chr17 | - |
| ENST00000571370    | RP11-199F11.2      | GENCODE             | 1112  | chr17 | - |
| ENST00000571370    | RP11-199F11.2      | GENCODE             | 1112  | chr17 | - |
| ENST00000571370    | RP11-199F11.2      | GENCODE             | 1112  | chr17 | - |
| ENST00000571370    | RP11-199F11.2      | GENCODE             | 1112  | chr17 | - |
| ENST00000429929    | AC008174.3         | GENCODE             | 440   | chr2  | - |
| NR_003098          | SNHG1              | RefSeq              | 1134  | chr11 | - |
| NR_003098          | SNHG1              | RefSeq              | 1134  | chr11 | - |
| NR_003098          | SNHG1              | RefSeq              | 1134  | chr11 | - |
| TCONS_00021927     | XLOC_010525        | LincRNAs identified | 932   | chr13 | - |
| uc010bmn.3         | LOC727849          | UCSC_knowngene      | 3113  | chr15 | - |
| NR_033699          | FMR1               | RefSeq              | 4215  | chrX  | + |
| NR_033699          | FMR1               | RefSeq              | 4215  | chrX  | + |
| NR_033699          | FMR1               | RefSeq              | 4215  | chrX  | + |
| NR_033699          | FMR1               | RefSeq              | 4215  | chrX  | + |
| NR_033699          | FMR1               | RefSeq              | 4215  | chrX  | + |
| ENST00000555250    | RP11-909M7.3       | GENCODE             | 707   | chr14 | - |
| ENST00000424274    | RP11-349P19.1      | GENCODE             | 525   | chr6  | + |
| ENST00000547748    | RP11-493L12.3      | GENCODE             | 663   | chr12 | - |
| ENST00000437494    | AC005077.5         | GENCODE             | 300   | chr7  | + |
| ENST00000571449    | RP11-473M20.14     | GENCODE             | 919   | chr16 | - |
| ENST00000569291    | RP11-452L6.1       | GENCODE             | 449   | chr16 | - |
| ENST00000507301    | FAM86EP            | GENCODE             | 624   | chr4  | - |
| ENST00000444872    | RP11-32B11.2       | GENCODE             | 433   | chr9  | + |
| ENST00000444872    | RP11-32B11.2       | GENCODE             | 433   | chr9  | + |
| ENST00000444872    | RP11-32B11.2       | GENCODE             | 433   | chr9  | + |
| ENST00000444561    | AC126544.2         | pseudogene          | 288   | chr17 | + |
| TCONS_00016430     | XLOC_007796        | LincRNAs identified | 2713  | chr9  | - |
| NR_026905          | C17orf69           | RefSeq              | 2477  | chr17 | + |
| chr5:3881075-38945 | chr5:3881075-38945 | LincRNAs identified | 13450 | chr5  | + |
| ENST00000557524    | RP11-895M11.3      | GENCODE             | 303   | chr14 | + |
| uc010kvv.3         | DJ031144           | UCSC_knowngene      | 1145  | chr7  | - |
| ENST00000441442    | SGOL1-AS1          | GENCODE             | 499   | chr3  | + |
| ENST00000441442    | SGOL1-AS1          | GENCODE             | 499   | chr3  | + |
| ENST00000441442    | SGOL1-AS1          | GENCODE             | 499   | chr3  | + |
| ENST00000441442    | SGOL1-AS1          | GENCODE             | 499   | chr3  | + |
| ENST00000441442    | SGOL1-AS1          | GENCODE             | 499   | chr3  | + |
| ENST00000441442    | SGOL1-AS1          | GENCODE             | 499   | chr3  | + |
| ENST00000441442    | SGOL1-AS1          | GENCODE             | 499   | chr3  | + |
| ENST00000441442    | SGOL1-AS1          | GENCODE             | 499   | chr3  | + |
| ENST00000441442    | SGOL1-AS1          | GENCODE             | 499   | chr3  | + |
| ENST00000441442    | SGOL1-AS1          | GENCODE             | 499   | chr3  | + |
| ENST00000441442    | SGOL1-AS1          | GENCODE             | 499   | chr3  | + |
| ENST00000441442    | SGOL1-AS1          | GENCODE             | 499   | chr3  | + |
| ENST00000441442    | SGOL1-AS1          | GENCODE             | 499   | chr3  | + |
| ENST00000441442    | SGOL1-AS1          | GENCODE             | 499   | chr3  | + |
| ENST00000441442    | SGOL1-AS1          | GENCODE             | 499   | chr3  | + |
| ENST00000441442    | SGOL1-AS1          | GENCODE             | 499   | chr3  | + |
| ENST00000560967    | RP11-109D20.2      | GENCODE             | 426   | chr15 | - |
| TCONS_00008256     | XLOC_003694        | LincRNAs identified | 435   | chr4  | + |
| TCONS_00018521     | XLOC_008828        | LincRNAs identified | 354   | chr10 | - |
| TCONS_00016481     | XLOC_007860        | LincRNAs identified | 653   | chr9  | - |
| NR_038904          | LOC100506305       | RefSeq              | 1576  | chr11 | - |
| ENST00000523190    | PVT1               | GENCODE             | 443   | chr8  | + |
| AK025564           |                    | NRED                | 2233  | chr19 | - |
| ENST00000514010    | RP11-93K22.13      | GENCODE             | 713   | chr3  | - |
| ENST00000427300    | RP11-429G19.2      | GENCODE             | 389   | chr10 | - |
| ENST00000558419    | CTD-2008A1.1       | GENCODE             | 424   | chr15 | + |
| NR_038361          | RSBN1L-AS1         | RefSeq              | 1978  | chr7  | - |

|           |           |                  |                                        |                       |
|-----------|-----------|------------------|----------------------------------------|-----------------------|
| 144717494 | 144761233 |                  | CTCCTCTACGGTCACTAAAAATATA              | intergenic            |
| 40929990  | 40932436  |                  | CTATGGTCTTAGATTTCCCAAGAAT              | intergenic            |
| 50618047  | 50656139  | ENST00000235290, | CCATTTTATTACT 8847                     | bidirectional         |
| 13001584  | 13011084  | NR_038904        | ATTTCTACAAATATTTTCGACATCTCC            | intergenic            |
| 123555828 | 123560910 |                  | ATAAAGCAAGGTGACTTTCTGCAGA              | bidirectional         |
| 7588577   | 7589689   |                  | TTGTCGGAAAAACAATCTACCTGTT              | intron sense-overlapp |
| 7588577   | 7589689   |                  | TTGTCGGAAAAACAATCTACCTGTT              | intron sense-overlapp |
| 7588577   | 7589689   |                  | TTGTCGGAAAAACAATCTACCTGTT              | intron sense-overlapp |
| 7588577   | 7589689   |                  | TTGTCGGAAAAACAATCTACCTGTT              | intron sense-overlapp |
| 7588577   | 7589689   |                  | TTGTCGGAAAAACAATCTACCTGTT              | intron sense-overlapp |
| 7588577   | 7589689   |                  | TTGTCGGAAAAACAATCTACCTGTT              | natural antisense     |
| 186652746 | 186664878 |                  | GCTGAAAGGGTGAGCCTGTGGTCTA              | natural antisense     |
| 62619459  | 62623360  | ENST00000537068  | TTTTTCTACTGCT 23642                    | bidirectional         |
| 62619459  | 62623360  | ENST00000537068  | TTTTTCTACTGCT 23642                    | bidirectional         |
| 62619459  | 62623360  | ENST00000537068  | TTTTTCTACTGCT 23642                    | bidirectional         |
| 21138601  | 21141197  |                  | AACCAAGATCCTTTAAATCCTGATG              | natural antisense     |
| 83140198  | 83182930  | ENST00000335068, | TAGAACCATTTTC 727849                   | intergenic            |
| 146993468 | 147032647 | NR_033700        | CTATTTAAAGGA/ 2332                     | exon sense-overlappi  |
| 146993468 | 147032647 | NR_033700        | CTATTTAAAGGA/ 2332                     | exon sense-overlappi  |
| 146993468 | 147032647 | NR_033700        | CTATTTAAAGGA/ 2332                     | exon sense-overlappi  |
| 146993468 | 147032647 | NR_033700        | CTATTTAAAGGA/ 2332                     | exon sense-overlappi  |
| 146993468 | 147032647 | NR_033700        | CTATTTAAAGGA/ 2332                     | exon sense-overlappi  |
| 101536823 | 101537573 |                  | GCACTTGGTGGAGATTTATGCCCAT              | intergenic            |
| 65087687  | 65122672  |                  | GTGTCCTCAGGGATATCACATGAAA              | intronic antisense    |
| 47631516  | 47672804  |                  | TGGGACATTCTGGCAAATTCTGACT              | intergenic            |
| 75803626  | 75806523  |                  | TTATGGGATGGAGACGCTGACAGGC              | intergenic            |
| 3181757   | 3184857   |                  | CAACTAGTAGATTTGGACATTTACA              | intronic antisense    |
| 31460855  | 31464814  |                  | ACAGTCACAGTTATGTCTCTGAGCT              | intergenic            |
| 3944578   | 3957090   |                  | TTTGCAGAAGGCCAGGCCAGGATCA              | intergenic            |
| 134907272 | 134952977 |                  | CCCACCTTGGCTTGTTTGACCACTTA             | natural antisense     |
| 134907272 | 134952977 |                  | CCCACCTTGGCTTGTTTGACCACTTA             | natural antisense     |
| 134907272 | 134952977 |                  | CCCACCTTGGCTTGTTTGACCACTTA             | natural antisense     |
| 43710414  | 43713807  |                  | TACTTGTTAGAGGACGATGAGCTCAGAAATGCAGTTTT |                       |
| 100164457 | 100174237 |                  | CTGCTATTGTAAGCTTTCTTTAGGG/             | natural antisense     |
| 43716340  | 43719671  | ENST00000580655  | CGAGGCATGTGT. 147081                   | intron sense-overlapp |
| 3828075   | 3841525   |                  | GTTTTCTACATTGACCATGCATCTTC             | intergenic            |
| 91884609  | 91887520  |                  | GCTCAAGGTGATGCATGTAAAAAGA              | bidirectional         |
| 30617110  | 30634419  | ENST00000578994, | TCGCCGCCGACGATTTCGACACAAAA             | natural antisense     |
| 20215777  | 20227607  |                  | CTTGCTCCATTGA 100874028                | natural antisense     |
| 20215777  | 20227607  |                  | CTTGCTCCATTGA 100874028                | natural antisense     |
| 20215777  | 20227607  |                  | CTTGCTCCATTGA 100874028                | natural antisense     |
| 20215777  | 20227607  |                  | CTTGCTCCATTGA 100874028                | natural antisense     |
| 20215777  | 20227607  |                  | CTTGCTCCATTGA 100874028                | natural antisense     |
| 20215777  | 20227607  |                  | CTTGCTCCATTGA 100874028                | natural antisense     |
| 20215777  | 20227607  |                  | CTTGCTCCATTGA 100874028                | natural antisense     |
| 20215777  | 20227607  |                  | CTTGCTCCATTGA 100874028                | natural antisense     |
| 20215777  | 20227607  |                  | CTTGCTCCATTGA 100874028                | natural antisense     |
| 20215777  | 20227607  |                  | CTTGCTCCATTGA 100874028                | natural antisense     |
| 20215777  | 20227607  |                  | CTTGCTCCATTGA 100874028                | natural antisense     |
| 20215777  | 20227607  |                  | CTTGCTCCATTGA 100874028                | natural antisense     |
| 20215777  | 20227607  |                  | CTTGCTCCATTGA 100874028                | natural antisense     |
| 20215777  | 20227607  |                  | CTTGCTCCATTGA 100874028                | natural antisense     |
| 45365689  | 45366246  | ENST00000558419  | CTCAATGAAGGCACACCAATTCCTC              | natural antisense     |
| 135548787 | 135561139 |                  | TGAACTGCAGATACAGACAACTACA              | intergenic            |
| 57911541  | 57914731  |                  | ATCAACACAGAAGCAGAAAGGGTCC              | intergenic            |
| 131097665 | 131100554 |                  | TATGCACACCAGGATTCATTCAAGG              | intergenic            |
| 13001080  | 13011095  |                  | TACCAAGAGAGG 100506305                 | intergenic            |
| 129021903 | 129113343 |                  | TTTAACCTGTCAI 5820                     | intergenic            |
| 12537720  | 12539934  |                  | CACTTTTTGTCCCCTGCTAGCCTTTT             | intergenic            |
| 129808275 | 129813147 |                  | ACACCTCAGGAAATTTCCCCTAAAG              | intronic antisense    |
| 97664412  | 97667640  |                  | CCAACCTAACATCAGCAGATATCCT              | bidirectional         |
| 45118737  | 45119292  | ENST00000560967  | CTCAATGAAGGCACACCAATTCCTC              | intergenic            |
| 77313167  | 77326662  |                  | TCTTAACCTGAA/ 100505854                | natural antisense     |

|                         |           |                          |           |           |
|-------------------------|-----------|--------------------------|-----------|-----------|
| ENST00000378180         | DLEU1     | deleted in lymphocyt +   | 50656306  | 50679433  |
| NM_012164               | FBXW2     | F-box/WD repeat-co-      | 123519253 | 123555740 |
| NM_000546               | TP53      | cellular tumor antigen-  | 7571719   | 7590868   |
| NM_001126112            | TP53      | cellular tumor antigen-  | 7571719   | 7590868   |
| NM_001126113            | TP53      | cellular tumor antigen-  | 7571719   | 7590868   |
| NM_001126114            | TP53      | cellular tumor antigen-  | 7571719   | 7590868   |
| NM_001126118            | TP53      | cellular tumor antigen-  | 7571719   | 7590868   |
| NM_001143990            | WRAP53    | telomerase Cajal bod +   | 7589388   | 7606820   |
| NM_173651               | FSIP2     | fibrous sheath-interac + | 186603354 | 186698016 |
| NM_001012662            | SLC3A2    | 4F2 cell-surface antiq + | 62623483  | 62656355  |
| NM_001012664            | SLC3A2    | 4F2 cell-surface antiq + | 62623483  | 62656355  |
| NM_002394               | SLC3A2    | 4F2 cell-surface antiq + | 62623483  | 62656355  |
| ENST00000382778         | IFT88     | intraflagellar transpo + | 21140584  | 21265501  |
| NM_001185075            | FMR1      | fragile X mental retar + | 146993468 | 147032647 |
| NM_001185076            | FMR1      | fragile X mental retar + | 146993468 | 147032647 |
| NM_001185081            | FMR1      | fragile X mental retar + | 146993468 | 147032647 |
| NM_001185082            | FMR1      | fragile X mental retar + | 146993468 | 147032647 |
| NM_002024               | FMR1      | fragile X mental retar + | 146993468 | 147032647 |
| NM_001142800            | EYS       | protein eyes shut hon -  | 64429875  | 66417118  |
| ENST00000573771         | ZNF213    | zinc finger protein 21 + | 3179777   | 3187435   |
| NM_001253881            | MED27     | mediator of RNA pol -    | 134735496 | 134955274 |
| NM_001253882            | MED27     | mediator of RNA pol -    | 134948737 | 134955274 |
| NM_004269               | MED27     | mediator of RNA pol -    | 134735496 | 134955274 |
| 'ATTGGTATTTGCCAATAAACAA |           |                          |           |           |
| ENST00000355295         | TDRD7     | tudor domain contain +   | 100174231 | 100258407 |
| NM_001256299            | CRHR1     | corticotropin-releasir + | 43697709  | 43913194  |
| NM_001080414            | CCDC88C   | protein Daple -          | 91737666  | 91884188  |
| NM_002047               | GARS      | glycine--tRNA ligase +   | 30634180  | 30673648  |
| NM_001012409            | SGOL1     | shugoshin-like 1 isof -  | 20209935  | 20227698  |
| NM_001012410            | SGOL1     | shugoshin-like 1 isof -  | 20202084  | 20227698  |
| NM_001012411            | SGOL1     | shugoshin-like 1 isof -  | 20209935  | 20227698  |
| NM_001012412            | SGOL1     | shugoshin-like 1 isof -  | 20202084  | 20227698  |
| NM_001012413            | SGOL1     | shugoshin-like 1 isof -  | 20209935  | 20227698  |
| NM_001199251            | SGOL1     | shugoshin-like 1 isof -  | 20209935  | 20227724  |
| NM_001199252            | SGOL1     | shugoshin-like 1 isof -  | 20202084  | 20227724  |
| NM_001199253            | SGOL1     | shugoshin-like 1 isof -  | 20209935  | 20227724  |
| NM_001199254            | SGOL1     | shugoshin-like 1 isof -  | 20202084  | 20227724  |
| NM_001199255            | SGOL1     | shugoshin-like 1 isof -  | 20209935  | 20227724  |
| NM_001199256            | SGOL1     | shugoshin-like 1 isof -  | 20202084  | 20227724  |
| NM_001199257            | SGOL1     | shugoshin-like 1 isof -  | 20202084  | 20227724  |
| NM_138484               | SGOL1     | shugoshin-like 1 isof -  | 20202084  | 20227698  |
| NM_003104               | SORD      | sorbitol dehydrogena +   | 45315301  | 45367287  |
|                         |           |                          |           |           |
| NM_001136152            | ALG1L2    | putative glycosyltran +  | 129800673 | 129817233 |
| NM_001130446            | C10orf131 | uncharacterized protc +  | 97667721  | 97698415  |
| NM_198467               | RSBN1L    | round spermatid basi +   | 77325742  | 77409120  |

|             |             |           |           |           |            |
|-------------|-------------|-----------|-----------|-----------|------------|
| 35.214154   | 11.525106   | 4.811619  | 3.430609  | 32.677975 | 31.839376  |
| 159.966273  | 26.919288   | 6.91123   | 5.026881  | 181.21497 | 205.3259   |
| 777.862183  | 120.96903   | 8.979646  | 7.208258  | 1117.6858 | 673.8493   |
| 725.222087  | 155.398835  | 8.714629  | 7.599995  | 322.4779  | 258.48215  |
| 32.660173   | 7.919386    | 4.689986  | 3.003063  | 34.082867 | 36.12547   |
| 85.039293   | 18.585567   | 5.895839  | 4.302219  | 59.945915 | 90.850716  |
| 85.039293   | 18.585567   | 5.895839  | 4.302219  | 59.945915 | 90.850716  |
| 85.039293   | 18.585567   | 5.895839  | 4.302219  | 59.945915 | 90.850716  |
| 85.039293   | 18.585567   | 5.895839  | 4.302219  | 59.945915 | 90.850716  |
| 85.039293   | 18.585567   | 5.895839  | 4.302219  | 59.945915 | 90.850716  |
| 85.039293   | 18.585567   | 5.895839  | 4.302219  | 59.945915 | 90.850716  |
| 1733.54805  | 267.87987   | 10.339007 | 8.28613   | 2038.8013 | 1606.9202  |
| 91.98084    | 19.975788   | 6.126249  | 4.537163  | 102.8817  | 120.08152  |
| 91.98084    | 19.975788   | 6.126249  | 4.537163  | 102.8817  | 120.08152  |
| 91.98084    | 19.975788   | 6.126249  | 4.537163  | 102.8817  | 120.08152  |
| 126.053971  | 33.927447   | 6.533275  | 5.391685  | 95.46774  | 105.130104 |
| 67.540644   | 14.243212   | 5.623607  | 4.036266  | 66.067566 | 100.18979  |
| 26.561313   | 8.489266    | 4.246964  | 3.223547  | 28.702147 | 11.84721   |
| 26.561313   | 8.489266    | 4.246964  | 3.223547  | 28.702147 | 11.84721   |
| 26.561313   | 8.489266    | 4.246964  | 3.223547  | 28.702147 | 11.84721   |
| 26.561313   | 8.489266    | 4.246964  | 3.223547  | 28.702147 | 11.84721   |
| 26.561313   | 8.489266    | 4.246964  | 3.223547  | 28.702147 | 11.84721   |
| 552.058505  | 171.759516  | 8.665014  | 7.614237  | 732.4412  | 822.4888   |
| 49.564804   | 14.882496   | 5.283039  | 4.145473  | 43.556225 | 36.124966  |
| 71.996643   | 12.315012   | 5.765598  | 3.872813  | 58.58219  | 39.66317   |
| 52.047823   | 8.163056    | 5.350857  | 3.121765  | 50.53604  | 40.976715  |
| 58.344822   | 15.69181    | 5.529417  | 3.756834  | 55.191296 | 49.935024  |
| 908.41932   | 281.556713  | 9.410593  | 8.376212  | 805.37866 | 936.11163  |
| 335.60206   | 96.230324   | 7.951415  | 6.806371  | 318.4233  | 462.98273  |
| 48.789492   | 13.847882   | 5.26998   | 4.016883  | 51.93067  | 40.763443  |
| 48.789492   | 13.847882   | 5.26998   | 4.016883  | 51.93067  | 40.763443  |
| 48.789492   | 13.847882   | 5.26998   | 4.016883  | 51.93067  | 40.763443  |
| 19.361174   | 5.768047    | 3.95436   | 2.65778   | 17.67862  | 16.75165   |
| 26.206528   | 6.792963    | 4.308914  | 2.744599  | 25.76184  | 25.489061  |
| 197.931067  | 56.561523   | 7.256539  | 6.102774  | 183.71991 | 162.23677  |
| 376.747014  | 109.715092  | 7.925993  | 6.877649  | 398.16464 | 403.00702  |
| 61.527219   | 8.236671    | 5.494593  | 3.309876  | 87.07647  | 91.07996   |
| 3434.8336   | 1053.23925  | 11.303399 | 10.267745 | 3694.9553 | 3351.5203  |
| 29.052032   | 5.48008     | 4.333255  | 2.553508  | 32.767464 | 44.127274  |
| 29.052032   | 5.48008     | 4.333255  | 2.553508  | 32.767464 | 44.127274  |
| 29.052032   | 5.48008     | 4.333255  | 2.553508  | 32.767464 | 44.127274  |
| 29.052032   | 5.48008     | 4.333255  | 2.553508  | 32.767464 | 44.127274  |
| 29.052032   | 5.48008     | 4.333255  | 2.553508  | 32.767464 | 44.127274  |
| 29.052032   | 5.48008     | 4.333255  | 2.553508  | 32.767464 | 44.127274  |
| 29.052032   | 5.48008     | 4.333255  | 2.553508  | 32.767464 | 44.127274  |
| 29.052032   | 5.48008     | 4.333255  | 2.553508  | 32.767464 | 44.127274  |
| 29.052032   | 5.48008     | 4.333255  | 2.553508  | 32.767464 | 44.127274  |
| 29.052032   | 5.48008     | 4.333255  | 2.553508  | 32.767464 | 44.127274  |
| 29.052032   | 5.48008     | 4.333255  | 2.553508  | 32.767464 | 44.127274  |
| 29.052032   | 5.48008     | 4.333255  | 2.553508  | 32.767464 | 44.127274  |
| 29.052032   | 5.48008     | 4.333255  | 2.553508  | 32.767464 | 44.127274  |
| 29.052032   | 5.48008     | 4.333255  | 2.553508  | 32.767464 | 44.127274  |
| 89.461293   | 17.29389    | 6.11761   | 4.344825  | 99.038864 | 114.3809   |
| 17.770083   | 6.675336    | 3.7524    | 2.722883  | 13.102758 | 9.707878   |
| 1942.424708 | 569.826215  | 10.417826 | 9.314421  | 2030.4451 | 2338.8562  |
| 220.491889  | 71.30377    | 7.310573  | 6.303718  | 266.2046  | 310.09274  |
| 446.988548  | 33.413465   | 7.318303  | 5.325092  | 70.88052  | 56.93192   |
| 144.816597  | 30.183999   | 6.750347  | 5.191719  | 128.61432 | 113.77998  |
| 280.35939   | 83.59366    | 7.72697   | 6.627783  | 310.83466 | 345.7152   |
| 31.597298   | 7.700948    | 4.622252  | 3.024856  | 39.890507 | 40.728577  |
| 53.930757   | 10.425199   | 5.419357  | 3.570167  | 49.674557 | 53.85292   |
| 69.43471    | 9.512859    | 5.752351  | 3.490425  | 75.50519  | 87.86358   |
| 11662.64767 | 3374.618167 | 13.021415 | 11.995308 | 14408.794 | 16862.91   |

|            |           |           |            |           |           |
|------------|-----------|-----------|------------|-----------|-----------|
| 38.62145   | 34.907692 | 31.015806 | 42.222622  | 15.1396   | 4.9999995 |
| 125.09517  | 90.55117  | 162.63428 | 194.97615  | 17.835352 | 19.554758 |
| 1624.8373  | 296.0423  | 451.34583 | 503.41257  | 130.77158 | 90.68517  |
| 320.61594  | 1815.4852 | 441.96063 | 1192.3107  | 134.7192  | 105.25419 |
| 27.6032    | 43.47433  | 21.48139  | 33.193783  | 6.0293465 | 4.9999995 |
| 29.631329  | 137.56677 | 62.938736 | 129.30229  | 20.20381  | 6.85913   |
| 29.631329  | 137.56677 | 62.938736 | 129.30229  | 20.20381  | 6.85913   |
| 29.631329  | 137.56677 | 62.938736 | 129.30229  | 20.20381  | 6.85913   |
| 29.631329  | 137.56677 | 62.938736 | 129.30229  | 20.20381  | 6.85913   |
| 29.631329  | 137.56677 | 62.938736 | 129.30229  | 20.20381  | 6.85913   |
| 29.631329  | 137.56677 | 62.938736 | 129.30229  | 20.20381  | 6.85913   |
| 2143.0698  | 1538.4971 | 1326.296  | 1747.7039  | 339.45755 | 174.49542 |
| 84.13848   | 52.26645  | 95.532486 | 96.984406  | 27.60205  | 24.18302  |
| 84.13848   | 52.26645  | 95.532486 | 96.984406  | 27.60205  | 24.18302  |
| 84.13848   | 52.26645  | 95.532486 | 96.984406  | 27.60205  | 24.18302  |
| 88.609764  | 82.30874  | 195.36636 | 189.44112  | 30.612692 | 27.755743 |
| 27.773582  | 53.011303 | 81.6944   | 76.50722   | 13.21594  | 8.337841  |
| 44.172     | 12.003471 | 31.07679  | 31.56626   | 10.53886  | 7.758108  |
| 44.172     | 12.003471 | 31.07679  | 31.56626   | 10.53886  | 7.758108  |
| 44.172     | 12.003471 | 31.07679  | 31.56626   | 10.53886  | 7.758108  |
| 44.172     | 12.003471 | 31.07679  | 31.56626   | 10.53886  | 7.758108  |
| 44.172     | 12.003471 | 31.07679  | 31.56626   | 10.53886  | 7.758108  |
| 478.3223   | 383.48615 | 429.3118  | 466.30078  | 207.88712 | 94.410934 |
| 55.74475   | 45.83562  | 56.780003 | 59.34726   | 13.287508 | 10.01587  |
| 63.761772  | 66.14074  | 100.82228 | 103.009705 | 11.908272 | 10.88523  |
| 57.101295  | 64.0626   | 36.605762 | 63.004528  | 9.052318  | 4.9999995 |
| 58.91923   | 67.962685 | 54.08971  | 63.970985  | 19.369308 | 4.9999995 |
| 603.48737  | 942.05176 | 963.7465  | 1199.74    | 242.00233 | 111.88697 |
| 174.67233  | 384.4921  | 270.79022 | 402.25168  | 62.907978 | 86.65958  |
| 43.638348  | 50.046272 | 46.37859  | 59.97963   | 13.348359 | 6.373055  |
| 43.638348  | 50.046272 | 46.37859  | 59.97963   | 13.348359 | 6.373055  |
| 43.638348  | 50.046272 | 46.37859  | 59.97963   | 13.348359 | 6.373055  |
| 27.254744  | 19.798153 | 16.5556   | 18.128279  | 7.5690455 | 4.9999995 |
| 10.67823   | 37.054207 | 24.669281 | 33.58655   | 4.9999995 | 4.9999995 |
| 180.82404  | 192.03362 | 208.84396 | 259.9281   | 46.25832  | 29.479496 |
| 424.47565  | 601.1502  | 61.695137 | 371.98944  | 128.83508 | 88.677086 |
| 75.65405   | 39.0675   | 37.96976  | 38.315575  | 9.73746   | 12.370708 |
| 4530.763   | 2348.7207 | 3067.1736 | 3615.8687  | 1404.6125 | 620.5423  |
| 12.49218   | 12.354619 | 35.01399  | 37.556667  | 4.9999995 | 4.9999995 |
| 12.49218   | 12.354619 | 35.01399  | 37.556667  | 4.9999995 | 4.9999995 |
| 12.49218   | 12.354619 | 35.01399  | 37.556667  | 4.9999995 | 4.9999995 |
| 12.49218   | 12.354619 | 35.01399  | 37.556667  | 4.9999995 | 4.9999995 |
| 12.49218   | 12.354619 | 35.01399  | 37.556667  | 4.9999995 | 4.9999995 |
| 12.49218   | 12.354619 | 35.01399  | 37.556667  | 4.9999995 | 4.9999995 |
| 12.49218   | 12.354619 | 35.01399  | 37.556667  | 4.9999995 | 4.9999995 |
| 12.49218   | 12.354619 | 35.01399  | 37.556667  | 4.9999995 | 4.9999995 |
| 12.49218   | 12.354619 | 35.01399  | 37.556667  | 4.9999995 | 4.9999995 |
| 12.49218   | 12.354619 | 35.01399  | 37.556667  | 4.9999995 | 4.9999995 |
| 12.49218   | 12.354619 | 35.01399  | 37.556667  | 4.9999995 | 4.9999995 |
| 12.49218   | 12.354619 | 35.01399  | 37.556667  | 4.9999995 | 4.9999995 |
| 12.49218   | 12.354619 | 35.01399  | 37.556667  | 4.9999995 | 4.9999995 |
| 12.49218   | 12.354619 | 35.01399  | 37.556667  | 4.9999995 | 4.9999995 |
| 12.49218   | 12.354619 | 35.01399  | 37.556667  | 4.9999995 | 4.9999995 |
| 12.49218   | 12.354619 | 35.01399  | 37.556667  | 4.9999995 | 4.9999995 |
| 12.49218   | 12.354619 | 35.01399  | 37.556667  | 4.9999995 | 4.9999995 |
| 12.49218   | 12.354619 | 35.01399  | 37.556667  | 4.9999995 | 4.9999995 |
| 72.86008   | 79.648674 | 73.920586 | 96.918655  | 18.877626 | 11.71744  |
| 14.673321  | 17.20808  | 27.481491 | 24.44697   | 4.9999995 | 4.9999995 |
| 1286.5386  | 922.80505 | 2586.7031 | 2489.2002  | 601.15894 | 241.49759 |
| 119.470276 | 111.88331 | 279.93835 | 235.36206  | 89.511086 | 45.253128 |
| 83.48965   | 1546.6577 | 174.7608  | 749.2107   | 30.510752 | 27.067291 |
| 140.02238  | 242.45789 | 76.58469  | 167.44032  | 27.010221 | 19.00276  |
| 188.6121   | 198.68286 | 324.39935 | 313.91217  | 93.43223  | 67.52546  |
| 29.127235  | 30.168936 | 18.223587 | 31.444946  | 5.6409926 | 4.9999995 |
| 51.65554   | 65.66558  | 47.827522 | 54.90842   | 6.150355  | 5.990272  |
| 54.301167  | 77.685295 | 49.74141  | 71.51162   | 9.183686  | 5.8305683 |
| 11277.358  | 10727.666 | 5889.516  | 10809.642  | 4224.381  | 1779.3439 |



|                  |                 |                  |                 |                  |                  |
|------------------|-----------------|------------------|-----------------|------------------|------------------|
| 21.982897        | 4.9999995       | 15.702829        | 6.325308        | 4.568616         | 4.919657         |
| 26.298046        | 35.70093        | 35.64865         | 26.477991       | 7.0423045        | 7.430937         |
| 190.69514        | 96.87471        | 125.76648        | 91.0211         | 9.650539         | 9.071569         |
| 153.91899        | 231.52855       | 154.26456        | 152.70752       | 7.875224         | 7.7494173        |
| 14.6394          | 4.9999995       | 11.2187395       | 5.628828        | 4.6286354        | 5.08421          |
| 36.84016         | 11.13368        | 21.818712        | 14.657911       | 5.4473157        | 6.29945          |
| 36.84016         | 11.13368        | 21.818712        | 14.657911       | 5.4473157        | 6.29945          |
| 36.84016         | 11.13368        | 21.818712        | 14.657911       | 5.4473157        | 6.29945          |
| 36.84016         | 11.13368        | 21.818712        | 14.657911       | 5.4473157        | 6.29945          |
| 36.84016         | 11.13368        | 21.818712        | 14.657911       | 5.4473157        | 6.29945          |
| 36.84016         | 11.13368        | 21.818712        | 14.657911       | 5.4473157        | 6.29945          |
| 525.3861         | 177.24565       | 235.7582         | 154.9363        | 10.51125         | 10.260273        |
| 20.32221         | 10.775821       | 24.154358        | 12.817269       | 6.237662         | 6.6811523        |
| 20.32221         | 10.775821       | 24.154358        | 12.817269       | 6.237662         | 6.6811523        |
| 20.32221         | 10.775821       | 24.154358        | 12.817269       | 6.237662         | 6.6811523        |
| 44.94838         | 32.23706        | 36.091278        | 31.919529       | 6.1300116        | 6.4992404        |
| 23.81825         | 11.54364        | 16.88597         | 11.65763        | 5.586079         | 6.4325547        |
| 13.508468        | 4.9999995       | 9.130159         | 4.9999995       | 4.3908386        | 3.6239464        |
| 13.508468        | 4.9999995       | 9.130159         | 4.9999995       | 4.3908386        | 3.6239464        |
| 13.508468        | 4.9999995       | 9.130159         | 4.9999995       | 4.3908386        | 3.6239464        |
| 13.508468        | 4.9999995       | 9.130159         | 4.9999995       | 4.3908386        | 3.6239464        |
| 13.508468        | 4.9999995       | 9.130159         | 4.9999995       | 4.3908386        | 3.6239464        |
| 357.68927        | 103.8066        | 130.1859         | 136.57727       | 9.0504           | 9.352016         |
| 22.25389         | 15.526158       | 15.491269        | 12.720281       | 4.987628         | 5.0840874        |
| 13.89715         | 13.29468        | 6.6816907        | 17.223051       | 5.410706         | 5.206507         |
| 9.247421         | 6.8371196       | 13.529529        | 5.311949        | 5.1946907        | 5.2489533        |
| 40.339565        | 6.2938876       | 14.595338        | 8.552764        | 5.3203783        | 5.507521         |
| 444.36572        | 219.5291        | 415.26746        | 256.2887        | 9.192798         | 9.53218          |
| 38.2157          | 132.97672       | 148.72896        | 107.893005      | 7.860411         | 8.54518          |
| 16.08807         | 17.8038         | 13.437681        | 16.03633        | 5.23283          | 5.242158         |
| 16.08807         | 17.8038         | 13.437681        | 16.03633        | 5.23283          | 5.242158         |
| 16.08807         | 17.8038         | 13.437681        | 16.03633        | 5.23283          | 5.242158         |
| 5.6811676        | 4.9999995       | 6.358071         | 4.9999995       | 3.6750293        | 4.075333         |
| 4.9999995        | 4.9999995       | 14.785301        | 5.972479        | 4.229718         | 4.6237307        |
| 65.97162         | 63.947475       | 74.24178         | 59.47045        | 7.064236         | 7.098665         |
| 227.23242        | 52.73336        | 38.243107        | 122.569496      | 8.181606         | 8.351657         |
| 6.142438         | 6.7910376       | 7.50134          | 6.877045        | 5.990756         | 6.302118         |
| 2148.386         | 676.81665       | 800.25275        | 668.8253        | 11.371436        | 11.295942        |
| 7.042278         | 4.9999995       | 5.838204         | 4.9999995       | 4.5733356        | 5.3475575        |
| 7.042278         | 4.9999995       | 5.838204         | 4.9999995       | 4.5733356        | 5.3475575        |
| 7.042278         | 4.9999995       | 5.838204         | 4.9999995       | 4.5733356        | 5.3475575        |
| 7.042278         | 4.9999995       | 5.838204         | 4.9999995       | 4.5733356        | 5.3475575        |
| 7.042278         | 4.9999995       | 5.838204         | 4.9999995       | 4.5733356        | 5.3475575        |
| 7.042278         | 4.9999995       | 5.838204         | 4.9999995       | 4.5733356        | 5.3475575        |
| 7.042278         | 4.9999995       | 5.838204         | 4.9999995       | 4.5733356        | 5.3475575        |
| 7.042278         | 4.9999995       | 5.838204         | 4.9999995       | 4.5733356        | 5.3475575        |
| 7.042278         | 4.9999995       | 5.838204         | 4.9999995       | 4.5733356        | 5.3475575        |
| 7.042278         | 4.9999995       | 5.838204         | 4.9999995       | 4.5733356        | 5.3475575        |
| 7.042278         | 4.9999995       | 5.838204         | 4.9999995       | 4.5733356        | 5.3475575        |
| 7.042278         | 4.9999995       | 5.838204         | 4.9999995       | 4.5733356        | 5.3475575        |
| 7.042278         | 4.9999995       | 5.838204         | 4.9999995       | 4.5733356        | 5.3475575        |
| 7.042278         | 4.9999995       | 5.838204         | 4.9999995       | 4.5733356        | 5.3475575        |
| 26.132206        | 11.76667        | 19.274958        | 15.99444        | 6.17936          | 6.615792         |
| 13.2753315       | 4.9999995       | 6.7766843        | 4.9999995       | 3.229991         | 3.3648887        |
| 1339.2848        | 431.76392       | 438.17517        | 367.07687       | 10.5040245       | 10.7691555       |
| 133.764          | 34.077045       | 83.64028         | 41.57708        | 7.599098         | 8.002637         |
| 29.60438         | 56.70821        | 19.6527          | 36.937458       | 5.689101         | 5.6761985        |
| <b>33.733986</b> | <b>38.77797</b> | <b>21.920176</b> | <b>40.65888</b> | <b>6.5566463</b> | <b>6.6095557</b> |
| 140.39465        | 45.15994        | 88.78058         | 66.2691         | 7.8239183        | 8.151571         |
| 8.481638         | 4.9999995       | 12.38543         | 9.69763         | 4.857488         | 5.2411833        |
| 13.989302        | 13.988781       | 13.600181        | 8.832303        | 5.1729603        | 5.608648         |
| 12.31349         | 9.529158        | 11.70712         | 8.51313         | 5.7838755        | 6.253922         |
| 6371.0557        | 2005.5336       | 3643.562         | 2223.8328       | 13.352356        | 13.588936        |

|           |           |           |            |           |           |
|-----------|-----------|-----------|------------|-----------|-----------|
| 4.957791  | 4.6899266 | 4.812683  | 4.921042   | 4.1552176 | 2.4279919 |
| 6.6453767 | 6.1481705 | 7.1162405 | 7.084349   | 4.3935523 | 5.114909  |
| 10.299192 | 7.8950005 | 8.559589  | 8.401984   | 7.260927  | 7.352209  |
| 7.987714  | 10.507644 | 8.528748  | 9.639024   | 7.3036885 | 7.562488  |
| 4.477397  | 5.0313506 | 4.3215647 | 4.5967603  | 2.794245  | 2.4279919 |
| 4.5791698 | 6.7763214 | 5.784082  | 6.488696   | 4.570642  | 3.5400226 |
| 4.5791698 | 6.7763214 | 5.784082  | 6.488696   | 4.570642  | 3.5400226 |
| 4.5791698 | 6.7763214 | 5.784082  | 6.488696   | 4.570642  | 3.5400226 |
| 4.5791698 | 6.7763214 | 5.784082  | 6.488696   | 4.570642  | 3.5400226 |
| 4.5791698 | 6.7763214 | 5.784082  | 6.488696   | 4.570642  | 3.5400226 |
| 10.709379 | 10.275186 | 10.097441 | 10.180511  | 8.676286  | 8.289914  |
| 6.0775433 | 5.315853  | 6.366231  | 6.079051   | 5.0224605 | 5.4292765 |
| 6.0775433 | 5.315853  | 6.366231  | 6.079051   | 5.0224605 | 5.4292765 |
| 6.0775433 | 5.315853  | 6.366231  | 6.079051   | 5.0224605 | 5.4292765 |
| 6.1507096 | 6.004851  | 7.373605  | 7.041234   | 5.1691947 | 5.6294403 |
| 4.4860234 | 5.3401175 | 6.1483808 | 5.748485   | 3.9516587 | 3.8286333 |
| 5.145861  | 2.9790778 | 4.817106  | 4.5249524  | 3.624174  | 3.7179737 |
| 5.145861  | 2.9790778 | 4.817106  | 4.5249524  | 3.624174  | 3.7179737 |
| 5.145861  | 2.9790778 | 4.817106  | 4.5249524  | 3.624174  | 3.7179737 |
| 5.145861  | 2.9790778 | 4.817106  | 4.5249524  | 3.624174  | 3.7179737 |
| 5.145861  | 2.9790778 | 4.817106  | 4.5249524  | 3.624174  | 3.7179737 |
| 8.550504  | 8.261265  | 8.486896  | 8.289      | 7.9453964 | 7.4149513 |
| 5.48584   | 5.1134753 | 5.6403193 | 5.386883   | 3.9607365 | 4.106607  |
| 5.6899724 | 5.676843  | 6.4422555 | 6.1673064  | 3.8031375 | 4.233918  |
| 5.521658  | 5.6283197 | 5.0410547 | 5.470466   | 3.3934383 | 2.4279919 |
| 5.565819  | 5.720097  | 5.5739594 | 5.4887266  | 4.5121126 | 2.4279919 |
| 8.868992  | 9.561344  | 9.661961  | 9.646286   | 8.175813  | 7.6548643 |
| 7.1191206 | 8.266245  | 7.83777   | 8.079763   | 6.2093406 | 7.286792  |
| 5.1239724 | 5.25235   | 5.3669186 | 5.401653   | 3.965902  | 3.4244344 |
| 5.1239724 | 5.25235   | 5.3669186 | 5.401653   | 3.965902  | 3.4244344 |
| 5.1239724 | 5.25235   | 5.3669186 | 5.401653   | 3.965902  | 3.4244344 |
| 4.4604807 | 3.7839713 | 3.9721143 | 3.759234   | 3.1156545 | 2.4279919 |
| 3.0958815 | 4.779579  | 4.51231   | 4.612265   | 2.3467326 | 2.4279919 |
| 7.171873  | 7.264973  | 7.465314  | 7.474171   | 5.7603602 | 5.721699  |
| 8.383337  | 8.913827  | 5.7541656 | 7.971365   | 7.240632  | 7.3184557 |
| 5.9241323 | 4.8660374 | 5.0942035 | 4.79031    | 3.5066657 | 4.424124  |
| 11.794888 | 10.862106 | 11.289319 | 11.206703  | 10.743273 | 10.139626 |
| 3.3138227 | 3.0228915 | 4.9783998 | 4.763521   | 2.3467326 | 2.4279919 |
| 3.3138227 | 3.0228915 | 4.9783998 | 4.763521   | 2.3467326 | 2.4279919 |
| 3.3138227 | 3.0228915 | 4.9783998 | 4.763521   | 2.3467326 | 2.4279919 |
| 3.3138227 | 3.0228915 | 4.9783998 | 4.763521   | 2.3467326 | 2.4279919 |
| 3.3138227 | 3.0228915 | 4.9783998 | 4.763521   | 2.3467326 | 2.4279919 |
| 3.3138227 | 3.0228915 | 4.9783998 | 4.763521   | 2.3467326 | 2.4279919 |
| 3.3138227 | 3.0228915 | 4.9783998 | 4.763521   | 2.3467326 | 2.4279919 |
| 3.3138227 | 3.0228915 | 4.9783998 | 4.763521   | 2.3467326 | 2.4279919 |
| 3.3138227 | 3.0228915 | 4.9783998 | 4.763521   | 2.3467326 | 2.4279919 |
| 3.3138227 | 3.0228915 | 4.9783998 | 4.763521   | 2.3467326 | 2.4279919 |
| 3.3138227 | 3.0228915 | 4.9783998 | 4.763521   | 2.3467326 | 2.4279919 |
| 3.3138227 | 3.0228915 | 4.9783998 | 4.763521   | 2.3467326 | 2.4279919 |
| 3.3138227 | 3.0228915 | 4.9783998 | 4.763521   | 2.3467326 | 2.4279919 |
| 3.3138227 | 3.0228915 | 4.9783998 | 4.763521   | 2.3467326 | 2.4279919 |
| 3.3138227 | 3.0228915 | 4.9783998 | 4.763521   | 2.3467326 | 2.4279919 |
| 5.873641  | 5.955542  | 6.002578  | 6.078749   | 4.4733043 | 4.342244  |
| 3.5508687 | 3.55852   | 4.6517677 | 4.1583643  | 2.3467326 | 2.4279919 |
| 9.965419  | 9.528695  | 11.060142 | 10.6795225 | 9.512833  | 8.766824  |
| 6.579909  | 6.463395  | 7.8839846 | 7.334412   | 6.712404  | 6.347512  |
| 6.066306  | 10.288283 | 7.2221823 | 8.967747   | 5.1645646 | 5.593311  |
| 6.8056498 | 7.6127796 | 6.0544424 | 6.8630075  | 4.9938626 | 5.071493  |
| 7.2364316 | 7.3138404 | 8.090627  | 7.745432   | 6.777698  | 6.9317765 |
| 4.5560927 | 4.463447  | 4.0954337 | 4.519867   | 2.6997633 | 2.4279919 |
| 5.373929  | 5.6655035 | 5.408334  | 5.2867675  | 2.823394  | 3.3299453 |
| 5.44571   | 5.917599  | 5.4633427 | 5.649657   | 3.4122398 | 3.2852955 |
| 13.140427 | 13.043523 | 12.220333 | 12.782915  | 12.351572 | 11.689759 |

|            |           |           |           |
|------------|-----------|-----------|-----------|
| 4.4922643  | 2.3408759 | 4.2439847 | 2.923317  |
| 4.7402105  | 5.389193  | 5.431282  | 5.0921373 |
| 7.524301   | 6.9309874 | 7.22117   | 6.9599533 |
| 7.21432    | 8.267684  | 7.497245  | 7.7545447 |
| 3.9380352  | 2.3408759 | 3.7627664 | 2.754466  |
| 5.205836   | 3.5887544 | 4.7203903 | 4.1876693 |
| 5.205836   | 3.5887544 | 4.7203903 | 4.1876693 |
| 5.205836   | 3.5887544 | 4.7203903 | 4.1876693 |
| 5.205836   | 3.5887544 | 4.7203903 | 4.1876693 |
| 5.205836   | 3.5887544 | 4.7203903 | 4.1876693 |
| 8.991232   | 7.8490705 | 8.133397  | 7.7768784 |
| 4.386918   | 3.5361571 | 4.863917  | 3.9842474 |
| 4.386918   | 3.5361571 | 4.863917  | 3.9842474 |
| 4.386918   | 3.5361571 | 4.863917  | 3.9842474 |
| 5.487895   | 5.222901  | 5.4486933 | 5.3919883 |
| 4.601135   | 3.6425295 | 4.3529983 | 3.84064   |
| 3.830193   | 2.3408759 | 3.4753118 | 2.352752  |
| 3.830193   | 2.3408759 | 3.4753118 | 2.352752  |
| 3.830193   | 2.3408759 | 3.4753118 | 2.352752  |
| 3.830193   | 2.3408759 | 3.4753118 | 2.352752  |
| 3.830193   | 2.3408759 | 3.4753118 | 2.352752  |
| 8.428124   | 7.043944  | 7.269566  | 7.583443  |
| 4.509212   | 4.098588  | 4.2257657 | 3.9719284 |
| 3.8703914  | 3.8547552 | 3.0454931 | 4.429181  |
| 3.3273416  | 2.8709912 | 4.030385  | 2.680445  |
| 5.332212   | 2.7567475 | 4.139688  | 3.3722532 |
| 8.755931   | 8.18761   | 8.940363  | 8.542692  |
| 5.2580667  | 7.4200006 | 7.4430404 | 7.220987  |
| 4.0679245  | 4.2987247 | 4.020419  | 4.3238955 |
| 4.0679245  | 4.2987247 | 4.020419  | 4.3238955 |
| 4.0679245  | 4.2987247 | 4.020419  | 4.3238955 |
| 2.7256498  | 2.3408759 | 2.9837534 | 2.352752  |
| 2.350709   | 2.3408759 | 4.1579375 | 2.8433492 |
| 6.022262   | 6.300123  | 6.475262  | 6.336935  |
| 7.7707605  | 5.9977736 | 5.525881  | 7.4123926 |
| 2.8164632  | 2.8642077 | 3.207969  | 3.0398293 |
| 11.0278225 | 9.872683  | 9.877325  | 9.94574   |
| 2.978301   | 2.3408759 | 2.8743918 | 2.352752  |
| 2.978301   | 2.3408759 | 2.8743918 | 2.352752  |
| 2.978301   | 2.3408759 | 2.8743918 | 2.352752  |
| 2.978301   | 2.3408759 | 2.8743918 | 2.352752  |
| 2.978301   | 2.3408759 | 2.8743918 | 2.352752  |
| 2.978301   | 2.3408759 | 2.8743918 | 2.352752  |
| 2.978301   | 2.3408759 | 2.8743918 | 2.352752  |
| 2.978301   | 2.3408759 | 2.8743918 | 2.352752  |
| 2.978301   | 2.3408759 | 2.8743918 | 2.352752  |
| 2.978301   | 2.3408759 | 2.8743918 | 2.352752  |
| 2.978301   | 2.3408759 | 2.8743918 | 2.352752  |
| 2.978301   | 2.3408759 | 2.8743918 | 2.352752  |
| 2.978301   | 2.3408759 | 2.8743918 | 2.352752  |
| 4.7304535  | 3.6677918 | 4.5354285 | 4.3197255 |
| 3.8056703  | 2.3408759 | 3.0632725 | 2.352752  |
| 10.32376   | 9.204118  | 9.014928  | 9.064061  |
| 7.019251   | 5.3120155 | 6.6404076 | 5.7907205 |
| 4.9066095  | 6.111949  | 4.560942  | 5.6131773 |
| 5.088114   | 5.513756  | 4.7270536 | 5.756035  |
| 7.0885835  | 5.7486734 | 6.7256374 | 6.494332  |
| 3.2108774  | 2.3408759 | 3.9059365 | 3.563689  |
| 3.8783271  | 3.9335487 | 4.0355835 | 3.4202032 |
| 3.707674   | 3.3486922 | 3.8246913 | 3.363959  |
| 12.602959  | 11.47612  | 12.117373 | 11.734064 |

|                      |                    |                    |                  |           |                  |
|----------------------|--------------------|--------------------|------------------|-----------|------------------|
| ASHGA5P053396        | 0.005768145        | 0.048278925        | 2.9249335        | up        | noncoding        |
| ASHGA5P048257        | 0.005109564        | 0.04540115         | 3.5042899        | up        | noncoding        |
| ASHGA5P045554        | 0.010055594        | 0.062161527        | 2.2073697        | up        | noncoding        |
| <b>ASHGA5P019706</b> | <b>0.001317953</b> | <b>0.024205782</b> | <b>16.817697</b> | <b>up</b> | <b>noncoding</b> |
| ASHGA5P015915        | 0.000313576        | 0.012923062        | 4.3265009        | up        | noncoding        |
| ASHGA5P019601        | 3.63296E-05        | 0.006164999        | 2.5049282        | up        | noncoding        |
| ASHGA5P019601        | 3.63296E-05        | 0.006164999        | 2.5049282        | up        | noncoding        |
| ASHGA5P051021        | 0.000171295        | 0.011182026        | 3.2402254        | up        | noncoding        |
| ASHGA5P022628        | 0.005151509        | 0.04558664         | 2.0127852        | up        | noncoding        |
| ASHGA5P033046        | 0.021369189        | 0.090089027        | 4.363316         | up        | noncoding        |
| ASHGA5P033447        | 0.000420016        | 0.014598519        | 2.3552318        | up        | noncoding        |
| ASHGA5P030819        | 0.009021594        | 0.059313506        | 2.1568351        | up        | noncoding        |
| ASHGA5P041845        | 0.000813142        | 0.019071379        | 2.0857918        | up        | noncoding        |
| ASHGA5P041845        | 0.000813142        | 0.019071379        | 2.0857918        | up        | noncoding        |
| ASHGA5P017056        | 0.038825351        | 0.12556577         | 2.6700308        | up        | noncoding        |
| ASHGA5P041149        | 8.81954E-06        | 0.004010044        | 3.1256532        | up        | noncoding        |
| ASHGA5P047835        | 0.022410242        | 0.092621507        | 2.4296065        | up        | noncoding        |
| ASHGA5P022933        | 0.016453163        | 0.078324477        | 3.2871146        | up        | noncoding        |
| ASHGA5P022933        | 0.016453163        | 0.078324477        | 3.2871146        | up        | noncoding        |
| ASHGA5P058457        | 0.000144907        | 0.010718755        | 2.5287809        | up        | noncoding        |
| ASHGA5P037280        | 0.000133243        | 0.010628132        | 3.6460353        | up        | noncoding        |
| ASHGA5P037280        | 0.000133243        | 0.010628132        | 3.6460353        | up        | noncoding        |
| ASHGA5P029480        | 0.008263135        | 0.056914687        | 2.3179226        | up        | noncoding        |
| ASHGA5P051222        | 0.005008527        | 0.044965036        | 2.0885861        | up        | noncoding        |
| ASHGA5P033345        | 0.048692548        | 0.143360998        | 3.1099446        | up        | noncoding        |
| ASHGA5P021293        | 0.014020963        | 0.072574415        | 2.5739962        | up        | noncoding        |
| ASHGA5P036274        | 0.021112237        | 0.089478872        | 2.2220884        | up        | noncoding        |
| ASHGA5P036274        | 0.021112237        | 0.089478872        | 2.2220884        | up        | noncoding        |
| ASHGA5P036274        | 0.021112237        | 0.089478872        | 2.2220884        | up        | noncoding        |
| ASHGA5P027738        | 0.014634741        | 0.073959919        | 3.4482127        | up        | noncoding        |
| ASHGA5P016120        | 0.027652884        | 0.103853965        | 2.0215157        | up        | noncoding        |
| ASHGA5P018491        | 0.025163821        | 0.098610046        | 2.0813683        | up        | noncoding        |
| ASHGA5P031329        | 0.006185487        | 0.050189379        | 2.621886         | up        | noncoding        |
| ASHGA5P019192        | 0.012303488        | 0.067865226        | 2.3459187        | up        | noncoding        |
| ASHGA5P037758        | 0.019511292        | 0.085195149        | 4.4025163        | up        | noncoding        |
| ASHGA5P032010        | 0.002222796        | 0.031049607        | 5.3993182        | up        | noncoding        |
| ASHGA5P045188        | 0.032907179        | 0.114192132        | 2.9110999        | up        | noncoding        |
| ASHGA5P046991        | 0.013623808        | 0.071680418        | 2.0512483        | up        | noncoding        |
| ASHGA5P027686        | 0.005000699        | 0.044918059        | 3.3862048        | up        | noncoding        |
| <b>ASHGA5P045033</b> | <b>0.00012043</b>  | <b>0.010119041</b> | <b>9.0292075</b> | <b>up</b> | <b>noncoding</b> |
| ASHGA5P032772        | 0.030805545        | 0.110259134        | 7.8136614        | up        | noncoding        |
| ASHGA5P038918        | 0.00078566         | 0.018693364        | 3.1318515        | up        | noncoding        |
| ASHGA5P038918        | 0.00078566         | 0.018693364        | 3.1318515        | up        | noncoding        |
| ASHGA5P038918        | 0.00078566         | 0.018693364        | 3.1318515        | up        | noncoding        |
| ASHGA5P000216        | 0.015677994        | 0.076574828        | 2.2219408        | up        | noncoding        |
| ASHGA5P055810        | 0.003769271        | 0.039397533        | 2.2652929        | up        | noncoding        |
| ASHGA5P055810        | 0.003769271        | 0.039397533        | 2.2652929        | up        | noncoding        |
| ASHGA5P015787        | 0.000260474        | 0.012185279        | 3.7150277        | up        | noncoding        |
| ASHGA5P019801        | 0.007345661        | 0.053840332        | 2.1619951        | up        | noncoding        |
| ASHGA5P037833        | 0.003637817        | 0.038710442        | 2.3163047        | up        | noncoding        |
| ASHGA5P031493        | 0.001936605        | 0.029326945        | 3.7421899        | up        | noncoding        |
| ASHGA5P019644        | 0.001491879        | 0.025745699        | 2.2582985        | up        | noncoding        |
| ASHGA5P019644        | 0.001491879        | 0.025745699        | 2.2582985        | up        | noncoding        |
| ASHGA5P038691        | 0.000668148        | 0.017209782        | 3.3484459        | up        | noncoding        |
| ASHGA5P022820        | 0.00831254         | 0.056954491        | 4.7218036        | up        | noncoding        |
| ASHGA5P022820        | 0.00831254         | 0.056954491        | 4.7218036        | up        | noncoding        |
| <b>ASHGA5P039927</b> | <b>0.010392084</b> | <b>0.062967308</b> | <b>2.733505</b>  | <b>up</b> | <b>noncoding</b> |
| ASHGA5P006918        | 0.00033011         | 0.013196023        | 2.4848971        | up        | noncoding        |
| ASHGA5P023069        | 0.022934567        | 0.093794227        | 2.0286676        | up        | noncoding        |
| ASHGA5P023069        | 0.022934567        | 0.093794227        | 2.0286676        | up        | noncoding        |
| ASHGA5P023069        | 0.022934567        | 0.093794227        | 2.0286676        | up        | noncoding        |
| ASHGA5P018708        | 0.000303249        | 0.012633464        | 3.9398001        | up        | noncoding        |

|                        |                    |                       |            |              |          |
|------------------------|--------------------|-----------------------|------------|--------------|----------|
| ENST00000454813        | GAS5               | GENCODE               | 621        | chr1         | -        |
| ENST00000528089        | FAM86C2P           | GENCODE               | 2496       | chr11        | -        |
| NR_003672              | SNHG7              | RefSeq                | 2176       | chr9         | -        |
| <b>uc010vhb.2</b>      | <b>CRNDE</b>       | <b>UCSC_knowngene</b> | <b>838</b> | <b>chr16</b> | <b>-</b> |
| ENST00000424756        | LINC00539          | GENCODE               | 347        | chr13        | +        |
| NR_048556              | TSN                | RefSeq                | 3314       | chr2         | +        |
| NR_048556              | TSN                | RefSeq                | 3314       | chr2         | +        |
| ENST00000428008        | ZNF1-AS1           | GENCODE               | 566        | chr20        | +        |
| ENST00000559979        | RP11-17L5.4        | GENCODE               | 558        | chr15        | -        |
| ENST00000577546        | RP11-118G23.2      | GENCODE               | 307        | chr17        | +        |
| ENST00000571113        | RP11-497H17.1      | GENCODE               | 504        | chr17        | +        |
| ENST00000420498        | RP11-297K8.2       | GENCODE               | 379        | chr1         | -        |
| uc003owm.1             | AK024736           | UCSC_knowngene        | 1515       | chr6         | -        |
| uc003owm.1             | AK024736           | UCSC_knowngene        | 1515       | chr6         | -        |
| ENST00000437157        | RP3-510D11.1       | GENCODE               | 548        | chr1         | -        |
| ENST00000457791        | PMCHL2             | pseudogene            | 237        | chr5         | +        |
| AK056943               |                    | LincRNAs identified   | 1856       | chr20        | +        |
| ENST00000565764        | CTA-445C9.14       | GENCODE               | 981        | chr22        | +        |
| ENST00000565764        | CTA-445C9.14       | GENCODE               | 981        | chr22        | +        |
| uc003tcy.3             | AK057321           | UCSC_knowngene        | 1766       | chr7         | +        |
| uc002ypm.3             | BC034802           | UCSC_knowngene        | 579        | chr21        | -        |
| uc002ypm.3             | BC034802           | UCSC_knowngene        | 579        | chr21        | -        |
| ENST00000552826        | NOVA1-AS1          | GENCODE               | 449        | chr14        | +        |
| uc021wmd.1             | BCR                | UCSC_knowngene        | 1500       | chr22        | -        |
| TCONS_00028072         | XLOC_013814        | LincRNAs identified   | 2067       | chr20        | -        |
| ENST00000529667        | AC005152.2         | GENCODE               | 340        | chr17        | -        |
| uc002umb.1             | BX538254           | UCSC_knowngene        | 1247       | chr2         | +        |
| uc002umb.1             | BX538254           | UCSC_knowngene        | 1247       | chr2         | +        |
| uc002umb.1             | BX538254           | UCSC_knowngene        | 1247       | chr2         | +        |
| DB336485               |                    | LincRNAs identified   | 589        | chrX         | +        |
| ENST00000427019        | AC113607.3         | GENCODE               | 589        | chr2         | -        |
| ENST00000454174        | RP11-80H5.2        | GENCODE               | 563        | chr10        | +        |
| TCONS_00006757         | XLOC_003387        | LincRNAs identified   | 2081       | chr3         | -        |
| NR_028444              | PDIA5              | RefSeq                | 1717       | chr3         | +        |
| uc010ofi.1             | SFN                | UCSC_knowngene        | 663        | chr1         | -        |
| NR_036480              | LOC100128881       | RefSeq                | 1753       | chr16        | +        |
| ENST00000424177        | RP11-462B18.2      | GENCODE               | 551        | chr9         | -        |
| TCONS_00015070         | XLOC_007146        | LincRNAs identified   | 244        | chr8         | -        |
| ENST00000545739        | RP11-955H22.3      | GENCODE               | 852        | chr12        | -        |
| <b>ENST00000522414</b> | <b>PVT1</b>        | <b>GENCODE</b>        | <b>654</b> | <b>chr8</b>  | <b>+</b> |
| ENST00000573270        | RP11-141J13.5      | GENCODE               | 1273       | chr17        | +        |
| uc003dtq.3             | AF090939           | UCSC_knowngene        | 2039       | chr3         | +        |
| uc003dtq.3             | AF090939           | UCSC_knowngene        | 2039       | chr3         | +        |
| uc003dtq.3             | AF090939           | UCSC_knowngene        | 2039       | chr3         | +        |
| chr11:8171725-8184     | chr11:8171725-8184 | LincRNAs identified   | 12300      | chr11        | +        |
| ENST00000568302        | RP11-173B14.5      | GENCODE               | 549        | chr13        | -        |
| ENST00000568302        | RP11-173B14.5      | GENCODE               | 549        | chr13        | -        |
| uc002xij.3             | LOC388796          | UCSC_knowngene        | 805        | chr20        | -        |
| ENST00000503428        | RP11-1379J22.5     | GENCODE               | 325        | chr5         | +        |
| ENST00000429328        | PDZK1IP1-AS1       | GENCODE               | 661        | chr1         | +        |
| ENST00000570700        | RP11-473M20.11     | GENCODE               | 302        | chr16        | +        |
| NR_048558              | TSN                | RefSeq                | 3101       | chr2         | +        |
| NR_048558              | TSN                | RefSeq                | 3101       | chr2         | +        |
| ENST00000430621        | AC034193.5         | GENCODE               | 683        | chr3         | +        |
| ENST00000563284        | RP11-304L19.1      | GENCODE               | 501        | chr16        | +        |
| ENST00000563284        | RP11-304L19.1      | GENCODE               | 501        | chr16        | +        |
| <b>ENST00000441504</b> | <b>DANCR</b>       | <b>GENCODE</b>        | <b>336</b> | <b>chr4</b>  | <b>+</b> |
| NR_026591              | RAD1               | RefSeq                | 4525       | chr5         | -        |
| ENST00000568971        | RP11-626G11.5      | GENCODE               | 360        | chr16        | -        |
| ENST00000568971        | RP11-626G11.5      | GENCODE               | 360        | chr16        | -        |
| ENST00000568971        | RP11-626G11.5      | GENCODE               | 360        | chr16        | -        |
| ENST00000456651        | RP3-522D1.1        | GENCODE               | 587        | chr1         | +        |

|           |           |                  |                             |                       |
|-----------|-----------|------------------|-----------------------------|-----------------------|
| 173833039 | 173834009 | ENST00000412059, | GATTCTGAGGTT/ 60674         | intergenic            |
| 67559254  | 67565140  | NR_024253        | TTTCCATCTAATC 645332        | intergenic            |
| 139619683 | 139622636 |                  | TGTCAGACTCCTC 84973         | intergenic            |
| 54952777  | 54962690  | ENST00000559432  | CTATTGGAAGGA/ 643911        | intergenic            |
| 21872277  | 21878694  |                  | GACCGACTTGAAATCAGAAAAGGA/   | intergenic            |
| 122513120 | 122525428 |                  | CATCCGAGAGTT( 7247          | exon sense-overlappi  |
| 122513120 | 122525428 |                  | CATCCGAGAGTT( 7247          | exon sense-overlappi  |
| 47895178  | 47905797  | NR_036659        | CTAGTTGCAGTC/ 441951        | bidirectional         |
| 79529047  | 79576183  |                  | AGTCATTCAGGTTTTCCAGGAGAGA   | intronic antisense    |
| 32007595  | 32007902  |                  | CCATCTGTGGTACTTGTAGTTTATI   | intronic antisense    |
| 80876157  | 80876661  |                  | CGCTGAGCCGCGCGTGCCGTTTTTA,  | intron sense-overlapp |
| 161123549 | 161129139 |                  | TGTAACAGATTACTCCGTCCTATA,   | natural antisense     |
| 43964176  | 44042389  |                  | CCTGCTTTGAGGACAGCTGAAGTCT,  | natural antisense     |
| 43964176  | 44042389  |                  | CCTGCTTTGAGGACAGCTGAAGTCT,  | natural antisense     |
| 9228326   | 9262678   |                  | TTTGCGCAGGTGGAGATCTCGCGGG   | intergenic            |
| 70671656  | 70672163  | ENST00000415808, | GAGAAACTGGGG 5370           |                       |
| 23128722  | 23130576  |                  | AAGGTTTCAGATGAGGATGGTAGTTC  | intergenic            |
| 26908520  | 26909878  |                  | TTTCCAGCAGATTCAAGAGGCAATT   | bidirectional         |
| 26908520  | 26909878  |                  | TTTCCAGCAGATTCAAGAGGCAATT   | bidirectional         |
| 32768503  | 32794385  |                  | GCGCATGTTTGGAGACTATATCATC,  | intron sense-overlapp |
| 33678774  | 33681045  |                  | GAAGGGAACATTGGATGTGTCAGCC   | natural antisense     |
| 33678774  | 33681045  |                  | GAAGGGAACATTGGATGTGTCAGCC   | natural antisense     |
| 27106446  | 27275587  |                  | TGAAAATTACTGAGGAAGCCTCTTA   | intergenic            |
| 21642517  | 21644017  | NM_004327, NM_0: | TCCCAACAGATCCAGATACCTAAT,   | intergenic            |
| 56130114  | 56134053  |                  | CTCTCTCCCCAGAAGTTTTGTGATTI  | intergenic            |
| 70067182  | 70115634  |                  | TCAGACACAGGTGAAAACCATCCAT   | intergenic            |
| 179278389 | 179298394 |                  | TCGTGCTTGGTTTTCCGGACCTTGCT  | intronic antisense    |
| 179278389 | 179298394 |                  | TCGTGCTTGGTTTTCCGGACCTTGCT  | intronic antisense    |
| 179278389 | 179298394 |                  | TCGTGCTTGGTTTTCCGGACCTTGCT  | intronic antisense    |
| 42804381  | 42804970  |                  | AGGCTCTCTCAAATTTTTCTCTAAG/  | intergenic            |
| 906611    | 916810    |                  | CAAATACTATGCTGCTGGTGTAC,    | intergenic            |
| 91405038  | 91410424  |                  | AGAGGTGTCAGGGGATTTGATGCAC   | natural antisense     |
| 194565037 | 194567506 |                  | TTCATGACCCCAGTATACCTCTCCC/  | intergenic            |
| 122785855 | 122880953 |                  | TGGCTGAAGAAG 10954          | exon sense-overlappi  |
| 27189786  | 27190449  |                  | TCTTATAGGCTACTGAGAGCAGGTT   | natural antisense     |
| 89778263  | 89784573  |                  | TGGTCACAGTCG( 100128881     | natural antisense     |
| 32840595  | 32841760  |                  | CACACAGTAGAATAACATAACTGTA   | intergenic            |
| 89578174  | 89600696  |                  | ATGTCAGTGGTGATCATTTTACTGA(  | intergenic            |
| 127808699 | 127824617 |                  | ACATTGAAAAGTTTATCCTCACCT/   | intergenic            |
| 129108764 | 129112133 |                  | TAAACATCTTGCC 5820          | intergenic            |
| 4513743   | 4520945   |                  | AGGCCACTTACAGCACTCGAATAAG   | intergenic            |
| 99652068  | 99654107  |                  | TGCATACTAGGGTAAAGAAAAATTT   | intron sense-overlapp |
| 99652068  | 99654107  |                  | TGCATACTAGGGTAAAGAAAAATTT   | intronic antisense    |
| 99652068  | 99654107  |                  | TGCATACTAGGGTAAAGAAAAATTT   | intronic antisense    |
| 8215149   | 8227449   |                  | AATTTGTATATTTAATTCTCCCTCTC  | intergenic            |
| 76178835  | 76210130  |                  | ACTGTTACCTCTAATAAAGTTTCATC( | intronic antisense    |
| 76178835  | 76210130  |                  | ACTGTTACCTCTAATAAAGTTTCATC( | natural antisense     |
| 37049238  | 37063962  | ENST00000423536, | TGCTTGTAAGGT( 388796        | intergenic            |
| 179085265 | 179091431 |                  | ATGGAACAAAAGGTCGGCTTGAGGT   | intergenic            |
| 47644921  | 47646011  |                  | TAGTCCTGATCT/ 100874253     | intergenic            |
| 3156764   | 3159577   |                  | CTCATTCTCAAGAAGAAGTTAATGT(  | intergenic            |
| 122513120 | 122525428 |                  | CATCCGAGAGTT( 7247          | exon sense-overlappi  |
| 122513120 | 122525428 |                  | CATCCGAGAGTT( 7247          | exon sense-overlappi  |
| 10045951  | 10048674  |                  | GAGCCTGCAGCACTTTCCTGCAAAG   | natural antisense     |
| 2141539   | 2145426   |                  | TGCGCAGAGGGGTCTGGCTGGACTA   | natural antisense     |
| 2141539   | 2145426   |                  | TGCGCAGAGGGGTCTGGCTGGACTA   | natural antisense     |
| 53578664  | 53579296  |                  | CGGCTCCCTTA/ 57291          | intergenic            |
| 34905365  | 34915731  |                  | TTTTATTCAGGG/ 5810          | exon sense-overlappi  |
| 19074183  | 19078963  |                  | CCGCGCACCGGAAAAAGCAAAGAG(   | natural antisense     |
| 19074183  | 19078963  |                  | CCGCGCACCGGAAAAAGCAAAGAG(   | natural antisense     |
| 19074183  | 19078963  |                  | CCGCGCACCGGAAAAAGCAAAGAG(   | natural antisense     |
| 113392649 | 113420493 |                  | CCTTCCGCAGGCTCAATCAAACCTT(  | intergenic            |

|                 |           |                         |   |           |           |
|-----------------|-----------|-------------------------|---|-----------|-----------|
| NM_001261401    | TSN       | translin isoform 2      | + | 122513120 | 122525428 |
| NM_004622       | TSN       | translin isoform 1      | + | 122513120 | 122525428 |
| NM_021035       | ZNFX1     | NFX1-type zinc fing     | - | 47862438  | 47894756  |
| NM_001146341    | ANKRD34C  | ankyrin repeat domai    | + | 79575145  | 79590581  |
| NM_001094       | ASIC2     | acid-sensing ion char   | - | 31340105  | 32483825  |
| NM_005993       | TBCD      | tubulin-specific chap   | + | 80709939  | 80901062  |
| NM_016406       | UFC1      | ubiquitin-fold modifi   | + | 161123533 | 161128646 |
| NM_001171992    | C6orf223  | uncharacterized prote   | + | 43968336  | 43973694  |
| NM_153246       | C6orf223  | uncharacterized prote   | + | 43968336  | 43973694  |
|                 |           |                         |   |           |           |
| NM_001008697    | TFIP11    | tuftelin-interacting pr | - | 26887893  | 26908437  |
| NM_012143       | TFIP11    | tuftelin-interacting pr | - | 26887893  | 26908437  |
| ENST00000404479 | AVL9      | AVL9 homolog (S. c      | + | 32535321  | 33078516  |
| NM_178817       | MRAP      | melanocortin-2 recep    | + | 33664123  | 33684599  |
| NM_206898       | MRAP      | melanocortin-2 recep    | + | 33664123  | 33687094  |
|                 |           |                         |   |           |           |
| NM_001139517    | PRKRA     | interferon-inducible c  | - | 179296140 | 179315484 |
| NM_001139518    | PRKRA     | interferon-inducible c  | - | 179296140 | 179315355 |
| NM_003690       | PRKRA     | interferon-inducible c  | - | 179296140 | 179315958 |
|                 |           |                         |   |           |           |
| NM_148977       | PANK1     | pantothenate kinase 1-  |   | 91339253  | 91405329  |
|                 |           |                         |   |           |           |
| NM_006810       | PDIA5     | protein disulfide-isor  | + | 122785855 | 122880953 |
| NM_006142       | SFN       | 14-3-3 protein sigma    | + | 27189632  | 27190947  |
| NM_004913       | C16orf7   | uncharacterized prote   | - | 89773540  | 89787394  |
|                 |           |                         |   |           |           |
|                 |           |                         |   |           |           |
| NM_032359       | C3orf26   | uncharacterized prote   | + | 99536677  | 99897476  |
| NM_001042459    | FILIP1L   | filamin A-interacting   | - | 99566771  | 99833349  |
| NM_182909       | FILIP1L   | filamin A-interacting   | - | 99551987  | 99833349  |
|                 |           |                         |   |           |           |
| NM_005358       | LMO7      | LIM domain only pro     | + | 76194569  | 76434006  |
| NM_006002       | UCHL3     | ubiquitin carboxyl-te   | + | 76123926  | 76180068  |
|                 |           |                         |   |           |           |
|                 |           |                         |   |           |           |
| NM_001261401    | TSN       | translin isoform 2      | + | 122513120 | 122525428 |
| NM_004622       | TSN       | translin isoform 1      | + | 122513120 | 122525428 |
| NM_001008737    | LOC401052 | uncharacterized prote   | - | 10048101  | 10052779  |
| NM_000296       | PKD1      | polycystin-1 isoform    | - | 2138710   | 2185899   |
| NM_001009944    | PKD1      | polycystin-1 isoform    | - | 2138710   | 2185899   |
|                 |           |                         |   |           |           |
| NM_002853       | RAD1      | cell cycle checkpoint   | - | 34905365  | 34915780  |
| NM_001160364    | TMC7      | transmembrane chan      | + | 18995608  | 19075262  |
| NM_016138       | COQ7      | ubiquinone biosynthe    | + | 19078916  | 19091417  |
| NM_024847       | TMC7      | transmembrane chan      | + | 18995255  | 19075262  |

|                    |                  |                  |                 |                  |                 |
|--------------------|------------------|------------------|-----------------|------------------|-----------------|
| 10750.6451         | 2034.910117      | 12.885199        | 11.336795       | 9477.081         | 7520.9316       |
| 87.047469          | 17.791313        | 6.051807         | 4.242685        | 94.28642         | 116.381516      |
| 1577.29391         | 437.799977       | 10.180522        | 9.038193        | 1534.9366        | 1882.5709       |
| <b>1939.807417</b> | <b>71.429164</b> | <b>10.308621</b> | <b>6.236713</b> | <b>1677.7031</b> | <b>419.5658</b> |
| 255.162943         | 33.927209        | 7.489885         | 5.376685        | 185.98445        | 127.68867       |
| 1457.510383        | 358.957973       | 10.084494        | 8.759725        | 1741.8114        | 1639.5204       |
| 1457.510383        | 358.957973       | 10.084494        | 8.759725        | 1741.8114        | 1639.5204       |
| 1920.072717        | 310.934813       | 10.354292        | 8.658197        | 2395.331         | 3572.6296       |
| 266.69533          | 83.649062        | 7.667126         | 6.657932        | 309.90176        | 335.3147        |
| 57.717888          | 7.870297         | 5.048721         | 2.923296        | 111.14891        | 108.22752       |
| 23.441889          | 7.641521         | 4.147555         | 2.911686        | 30.066444        | 12.422369       |
| 71.158937          | 23.193359        | 5.757188         | 4.648272        | 85.17901         | 103.14032       |
| 26.039988          | 8.41812          | 4.369322         | 3.308727        | 32.747986        | 26.105202       |
| 26.039988          | 8.41812          | 4.369322         | 3.308727        | 32.747986        | 26.105202       |
| 157.60176          | 47.533578        | 6.624234         | 5.207378        | 180.3705         | 207.60675       |
| 40.753135          | 8.682593         | 4.902129         | 3.257971        | 24.475904        | 31.692387       |
| 21.510867          | 7.124972         | 4.068024         | 2.787302        | 26.756659        | 20.170282       |
| 49.680378          | 9.579941         | 5.012235         | 3.295413        | 33.82583         | 12.257938       |
| 49.680378          | 9.579941         | 5.012235         | 3.295413        | 33.82583         | 12.257938       |
| 568.053025         | 141.898035       | 8.744401         | 7.405959        | 577.88696        | 421.6126        |
| 25.754533          | 5.186516         | 4.350742         | 2.484413        | 29.332417        | 29.801147       |
| 25.754533          | 5.186516         | 4.350742         | 2.484413        | 29.332417        | 29.801147       |
| 116.316455         | 44.961433        | 6.365415         | 5.152582        | 149.23245        | 60.79848        |
| 20.628618          | 7.761166         | 4.000625         | 2.938098        | 20.8772          | 10.79214        |
| 782.89104          | 213.624437       | 9.084569         | 7.44768         | 689.9766         | 731.3918        |
| 427.859113         | 102.867011       | 8.28253          | 6.91852         | 452.7533         | 555.4388        |
| 28.503099          | 9.896651         | 4.498355         | 3.346439        | 36.62815         | 30.316042       |
| 28.503099          | 9.896651         | 4.498355         | 3.346439        | 36.62815         | 30.316042       |
| 28.503099          | 9.896651         | 4.498355         | 3.346439        | 36.62815         | 30.316042       |
| 36.965432          | 8.550593         | 4.784997         | 2.999148        | 29.491035        | 59.75153        |
| 1037.368517        | 322.723299       | 9.53828          | 8.522843        | 931.0764         | 1003.9726       |
| 31.146869          | 12.555868        | 4.545984         | 3.488452        | 35.78565         | 28.212313       |
| 112.494284         | 30.900586        | 6.415515         | 5.024911        | 141.77417        | 157.60875       |
| 147.707082         | 39.294843        | 6.807881         | 5.577728        | 145.02911        | 90.95939        |
| 117.01996          | 22.567778        | 6.427223         | 4.288895        | 167.3139         | 187.97725       |
| 151.444525         | 16.608473        | 6.661809         | 4.229032        | 206.4612         | 315.21988       |
| 79.876579          | 14.671084        | 5.605952         | 4.064387        | 55.50912         | 88.75417        |
| 37.09734           | 12.929272        | 4.834134         | 3.797632        | 52.42129         | 48.704067       |
| 154.929213         | 31.383718        | 6.786255         | 5.026586        | 222.2414         | 237.48242       |
| <b>147.755772</b>  | <b>10.97213</b>  | <b>6.815831</b>  | <b>3.641231</b> | <b>139.80717</b> | <b>128.9881</b> |
| 354.917593         | 7.801135         | 5.985613         | 3.019614        | 33.34432         | 49.98985        |
| 1376.360667        | 269.948275       | 9.954222         | 8.307206        | 1060.4282        | 987.708         |
| 1376.360667        | 269.948275       | 9.954222         | 8.307206        | 1060.4282        | 987.708         |
| 1376.360667        | 269.948275       | 9.954222         | 8.307206        | 1060.4282        | 987.708         |
| 250.99047          | 81.493835        | 7.579522         | 6.427702        | 305.88437        | 315.1074        |
| 159.116192         | 41.528583        | 6.865588         | 5.685891        | 142.41237        | 61.297024       |
| 159.116192         | 41.528583        | 6.865588         | 5.685891        | 142.41237        | 61.297024       |
| 1120.976067        | 174.800988       | 9.650401         | 7.757028        | 1268.7169        | 1752.0636       |
| 1237.044517        | 327.276028       | 9.759644         | 8.647281        | 1527.1295        | 2018.1864       |
| 387.106852         | 97.446883        | 8.161594         | 6.949769        | 482.01343        | 375.67862       |
| 344.183117         | 58.648181        | 8.031199         | 6.127316        | 313.15692        | 245.66928       |
| 492.681673         | 135.115991       | 8.551975         | 7.376738        | 513.16693        | 429.15292       |
| 492.681673         | 135.115991       | 8.551975         | 7.376738        | 513.16693        | 429.15292       |
| 1807.960467        | 288.442212       | 10.274753        | 8.531261        | 1857.4738        | 2733.4202       |
| 182.387528         | 23.276871        | 6.890342         | 4.651004        | 227.84512        | 388.6142        |
| 182.387528         | 23.276871        | 6.890342         | 4.651004        | 227.84512        | 388.6142        |
| <b>3627.1691</b>   | <b>715.33611</b> | <b>11.25052</b>  | <b>9.799768</b> | <b>4083.691</b>  | <b>6016.137</b> |
| 1227.51774         | 288.607962       | 9.853087         | 8.539901        | 1253.3474        | 1079.5638       |
| 23.057858          | 8.306912         | 4.184729         | 3.164197        | 19.401173        | 17.766785       |
| 23.057858          | 8.306912         | 4.184729         | 3.164197        | 19.401173        | 17.766785       |
| 23.057858          | 8.306912         | 4.184729         | 3.164197        | 19.401173        | 17.766785       |
| 1865.186167        | 230.532465       | 10.168462        | 8.190339        | 2731.8196        | 4057.815        |



|                  |                  |                  |                  |                  |                  |
|------------------|------------------|------------------|------------------|------------------|------------------|
| 11265.564        | 17442.828        | 6095.361         | 12702.105        | 1457.5242        | 1350.3302        |
| 52.209198        | 91.12787         | 67.91101         | 100.3688         | 6.4325           | 9.542981         |
| 935.19196        | 1721.614         | 1482.1716        | 1907.2784        | 537.34863        | 237.80438        |
| <b>2544.808</b>  | <b>2721.0386</b> | <b>1663.474</b>  | <b>2612.255</b>  | <b>52.416042</b> | <b>63.805264</b> |
| 196.90344        | 183.07654        | 414.9571         | 422.36746        | 25.471645        | 26.304087        |
| 1586.521         | 1068.2518        | 1216.136         | 1492.8217        | 416.07474        | 235.77245        |
| 1586.521         | 1068.2518        | 1216.136         | 1492.8217        | 416.07474        | 235.77245        |
| 896.5119         | 1800.5338        | 1156.7584        | 1698.6716        | 317.0396         | 327.73093        |
| 198.1051         | 193.83295        | 266.66287        | 296.3546         | 99.48429         | 46.243263        |
| 22.011026        | 11.34776         | 58.169605        | 35.402508        | 8.343639         | 4.9999995        |
| 37.23398         | 15.35244         | 21.699602        | 23.8765          | 6.501653         | 4.9999995        |
| 58.7234          | 46.47485         | 62.67367         | 70.76237         | 33.966194        | 12.973089        |
| 25.468615        | 31.282568        | 16.46153         | 24.174028        | 7.030767         | 6.093693         |
| 25.468615        | 31.282568        | 16.46153         | 24.174028        | 7.030767         | 6.093693         |
| 122.85239        | 25.6617          | 268.42044        | 140.69878        | 68.81674         | 15.053138        |
| 21.631058        | 43.69169         | 61.38471         | 61.64306         | 5.5015745        | 5.7097197        |
| 16.57612         | 16.38664         | 18.275267        | 30.900234        | 8.114907         | 4.9999995        |
| 57.09554         | 108.82429        | 21.99864         | 64.08003         | 6.0481043        | 4.9999995        |
| 57.09554         | 108.82429        | 21.99864         | 64.08003         | 6.0481043        | 4.9999995        |
| 626.641          | 539.85864        | 518.93915        | 723.3798         | 137.9469         | 77.54272         |
| 24.188448        | 19.55415         | 27.03338         | 24.617659        | 4.9999995        | 4.9999995        |
| 24.188448        | 19.55415         | 27.03338         | 24.617659        | 4.9999995        | 4.9999995        |
| 223.51389        | 116.8175         | 59.20584         | 88.33057         | 66.04621         | 8.052607         |
| 31.585838        | 23.664288        | 14.716338        | 22.135906        | 4.9999995        | 4.9999995        |
| 470.34634        | 370.9002         | 1382.8269        | 1051.9044        | 199.3131         | 100.74629        |
| 269.9925         | 599.66144        | 235.71269        | 453.59595        | 77.25147         | 51.397175        |
| 21.153128        | 26.708319        | 25.383945        | 30.829008        | 14.52259         | 4.9999995        |
| 21.153128        | 26.708319        | 25.383945        | 30.829008        | 14.52259         | 4.9999995        |
| 21.153128        | 26.708319        | 25.383945        | 30.829008        | 14.52259         | 4.9999995        |
| 23.637655        | 24.619562        | 45.023197        | 39.269615        | 4.9999995        | 4.9999995        |
| 1152.1102        | 1517.3818        | 452.6213         | 1167.0488        | 400.03882        | 262.881          |
| 44.309814        | 14.26193         | 34.340954        | 29.97055         | 12.92976         | 4.9999995        |
| 92.541046        | 74.80904         | 111.44949        | 96.78321         | 36.845615        | 16.476908        |
| 219.19124        | 113.84359        | 152.25146        | 164.9677         | 26.977015        | 29.609888        |
| 98.15576         | 78.355           | 79.16055         | 91.1573          | 23.85625         | 4.9999995        |
| 61.174553        | 78.614           | 119.841995       | 127.35552        | 17.278507        | 12.712532        |
| 14.24332         | 170.59337        | 40.863293        | 109.2962         | 23.76211         | 20.550522        |
| 27.11855         | 37.03348         | 22.805813        | 34.50084         | 19.585592        | 10.363169        |
| 110.59901        | 66.15954         | 172.2711         | 120.82181        | 37.335335        | 20.705294        |
| <b>122.48898</b> | <b>203.2481</b>  | <b>97.53829</b>  | <b>194.46399</b> | <b>16.89942</b>  | <b>12.168402</b> |
| 6.608051         | 1392.4952        | 23.761496        | 623.30664        | 6.1242003        | 4.9999995        |
| 1160.8174        | 2190.867         | 968.8668         | 1889.4766        | 191.67204        | 211.23085        |
| 1160.8174        | 2190.867         | 968.8668         | 1889.4766        | 191.67204        | 211.23085        |
| 1160.8174        | 2190.867         | 968.8668         | 1889.4766        | 191.67204        | 211.23085        |
| 208.26523        | 176.13048        | 224.16612        | 276.38922        | 91.671425        | 29.9913          |
| 171.91287        | 218.11234        | 140.7339         | 220.22865        | 42.118855        | 28.575373        |
| 171.91287        | 218.11234        | 140.7339         | 220.22865        | 42.118855        | 28.575373        |
| 711.2311         | 658.3378         | 1169.1962        | 1166.3108        | 140.94658        | 163.20955        |
| 761.9639         | 619.7929         | 1356.4459        | 1138.7485        | 414.59708        | 241.29413        |
| 578.5983         | 237.64848        | 312.33038        | 336.3719         | 95.60457         | 80.29828         |
| 322.97092        | 434.70248        | 300.9268         | 447.6723         | 57.933968        | 70.146164        |
| 591.6105         | 466.69922        | 440.70587        | 514.7546         | 140.99448        | 119.89298        |
| 591.6105         | 466.69922        | 440.70587        | 514.7546         | 140.99448        | 119.89298        |
| 741.1779         | 1048.3759        | 2171.5464        | 2295.7686        | 275.38562        | 226.99312        |
| 47.941235        | 159.92793        | 119.58848        | 150.4082         | 17.03396         | 17.988161        |
| 47.941235        | 159.92793        | 119.58848        | 150.4082         | 17.03396         | 17.988161        |
| <b>1658.2612</b> | <b>4482.7993</b> | <b>1885.4965</b> | <b>3636.6296</b> | <b>547.69434</b> | <b>433.18304</b> |
| 1231.8217        | 1424.358         | 927.41174        | 1448.6038        | 332.763          | 283.11935        |
| 18.215904        | 23.888443        | 28.951077        | 30.123768        | 8.618533         | 5.881529         |
| 18.215904        | 23.888443        | 28.951077        | 30.123768        | 8.618533         | 5.881529         |
| 18.215904        | 23.888443        | 28.951077        | 30.123768        | 8.618533         | 5.881529         |
| 681.1596         | 770.904          | 1447.0073        | 1502.4115        | 256.00644        | 266.25687        |

|                  |                  |                  |                  |                  |                  |
|------------------|------------------|------------------|------------------|------------------|------------------|
| 1522.8372        | 2342.7432        | 3220.3074        | 2315.7185        | 12.716614        | 12.418426        |
| 12.25663         | 34.56606         | 23.966578        | 19.98313         | 6.111949         | 6.638878         |
| 805.96985        | 323.46915        | 398.98193        | 323.22592        | 10.118137        | 10.465122        |
| <b>45.127888</b> | <b>169.75772</b> | <b>20.540112</b> | <b>76.92796</b>  | <b>10.241213</b> | <b>8.405157</b>  |
| 42.798546        | 33.69071         | 44.45701         | 30.841259        | 7.0846567        | 6.7675476        |
| 600.33966        | 218.44637        | 427.76312        | 255.3515         | 10.285152        | 10.2847595       |
| 600.33966        | 218.44637        | 427.76312        | 255.3515         | 10.285152        | 10.2847595       |
| 342.25192        | 337.15747        | 273.73856        | 267.6904         | 10.74749         | 11.380152        |
| 132.20389        | 82.56025         | 69.729805        | 71.672874        | 7.8194895        | 8.106307         |
| 17.613869        | 4.9999995        | 6.2642775        | 4.9999995        | 6.348556         | 6.5395555        |
| 15.47081         | 4.9999995        | 8.876665         | 4.9999995        | 4.4552975        | 3.6861494        |
| 42.969044        | 12.240588        | 22.73294         | 14.278301        | 5.959047         | 6.4735727        |
| 8.783686         | 13.697829        | 5.7921677        | 9.11058          | 4.5726643        | 4.6559877        |
| 8.783686         | 13.697829        | 5.7921677        | 9.11058          | 4.5726643        | 4.6559877        |
| 130.8164         | 10.064541        | 48.42013         | 12.03052         | 7.0376287        | 7.444062         |
| 4.9999995        | 11.342192        | 15.684301        | 8.857769         | 4.1560416        | 4.913018         |
| 4.9999995        | 14.634929        | 4.9999995        | 4.9999995        | 4.285285         | 4.308419         |
| 12.721691        | 6.1584544        | 16.746729        | 10.804669        | 4.617239         | 3.6673532        |
| 12.721691        | 6.1584544        | 16.746729        | 10.804669        | 4.617239         | 3.6673532        |
| 207.69302        | 100.54517        | 207.4302         | 120.2302         | 8.697764         | 8.410749         |
| 5.8445764        | 4.9999995        | 4.9999995        | 5.274524         | 4.4188957        | 4.8323226        |
| 5.8445764        | 4.9999995        | 4.9999995        | 5.274524         | 4.4188957        | 4.8323226        |
| 133.46768        | 21.312073        | 23.81356         | 17.07647         | 6.766109         | 5.764691         |
| 9.772247         | 14.777357        | 4.9999995        | 7.017396         | 3.9254444        | 3.4983444        |
| 751.549          | 71.84063         | 84.25216         | 74.04544         | 8.959921         | 9.190696         |
| 97.70233         | 91.91839         | 189.12737        | 109.80533        | 8.346241         | 8.808494         |
| 16.652136        | 9.856381         | 6.497839         | 6.850963         | 4.730001         | 4.8565645        |
| 16.652136        | 9.856381         | 6.497839         | 6.850963         | 4.730001         | 4.8565645        |
| 16.652136        | 9.856381         | 6.497839         | 6.850963         | 4.730001         | 4.8565645        |
| 21.982664        | 6.9751105        | 6.3531804        | 5.992606         | 4.426147         | 5.737925         |
| 522.4824         | 172.32628        | 118.697815       | 459.91348        | 9.394972         | 9.625287         |
| 30.682272        | 6.3048453        | 15.114631        | 5.3037004        | 4.6981654        | 4.761913         |
| 69.858315        | 23.707752        | 24.609165        | 13.905761        | 6.696677         | 7.0612116        |
| 28.747158        | 49.95041         | 56.442757        | 44.041832        | 6.72624          | 6.300601         |
| 46.928314        | 9.409764         | 35.72559         | 14.48675         | 6.9289193        | 7.3125806        |
| 32.53402         | 14.14483         | 13.248291        | 9.732659         | 7.236231         | 8.024297         |
| 11.52274         | 15.600319        | 8.863767         | 7.727048         | 5.3299847        | 6.266438         |
| 24.460474        | 9.100443         | 7.5111957        | 6.554757         | 5.2444377        | 5.4777617        |
| 73.93515         | 14.337931        | 16.349808        | 25.638792        | 7.3460164        | 7.629021         |
| <b>9.629401</b>  | <b>15.612959</b> | <b>5.5820165</b> | <b>5.940584</b>  | <b>6.674798</b>  | <b>6.780623</b>  |
| 7.3587017        | 12.923561        | 4.9999995        | 10.40035         | 4.5973473        | 5.5092583        |
| 156.90063        | 577.1025         | 191.5571         | 291.22653        | 9.580333         | 9.603598         |
| 156.90063        | 577.1025         | 191.5571         | 291.22653        | 9.580333         | 9.603598         |
| 156.90063        | 577.1025         | 191.5571         | 291.22653        | 9.580333         | 9.603598         |
| 194.01933        | 55.02098         | 64.601105        | 53.658867        | 7.8046746        | 8.023499         |
| 42.405163        | 56.771877        | 39.15552         | 40.14471         | 6.703782         | 5.775085         |
| 42.405163        | 56.771877        | 39.15552         | 40.14471         | 6.703782         | 5.775085         |
| 110.04651        | 169.53333        | 270.52972        | 194.54024        | 9.836138         | 10.369123        |
| 553.28516        | 234.98592        | 284.84735        | 234.64653        | 10.1121025       | 10.564302        |
| 104.41108        | 104.09899        | 108.34932        | 91.91906         | 8.433533         | 8.260652         |
| 46.606197        | 93.84922         | 26.48987         | 56.86367         | 7.835102         | 7.674845         |
| 154.48799        | 88.04018         | 195.80492        | 111.475395       | 8.518262         | 8.435698         |
| 154.48799        | 88.04018         | 195.80492        | 111.475395       | 8.518262         | 8.435698         |
| 281.6259         | 318.605          | 383.04           | 245.00363        | 10.379971        | 11.004203        |
| 19.17898         | 8.704041         | 48.806282        | 27.949802        | 7.3804493        | 8.308653         |
| 19.17898         | 8.704041         | 48.806282        | 27.949802        | 7.3804493        | 8.308653         |
| <b>615.97394</b> | <b>669.6207</b>  | <b>1214.29</b>   | <b>811.25464</b> | <b>11.507314</b> | <b>12.093601</b> |
| 340.74915        | 255.93909        | 294.04303        | 225.03415        | 9.814762         | 9.728731         |
| 13.35673         | 4.9999995        | 11.984681        | 4.9999995        | 3.8188398        | 4.1497364        |
| 13.35673         | 4.9999995        | 11.984681        | 4.9999995        | 3.8188398        | 4.1497364        |
| 13.35673         | 4.9999995        | 11.984681        | 4.9999995        | 3.8188398        | 4.1497364        |
| 199.4907         | 170.1862         | 294.6131         | 196.64148        | 10.926817        | 11.56925         |

|                  |                  |                  |                  |                  |                  |
|------------------|------------------|------------------|------------------|------------------|------------------|
| 13.13705         | 13.785112        | 12.256933        | 12.997057        | 10.806877        | 11.278831        |
| 5.3876977        | 6.1569686        | 5.885818         | 6.129531         | 2.8828216        | 4.032107         |
| 9.500546         | 10.435458        | 10.255947        | 10.3079195       | 9.343954         | 8.742029         |
| <b>10.961197</b> | <b>11.078003</b> | <b>10.414447</b> | <b>10.751712</b> | <b>5.947156</b>  | <b>6.8535905</b> |
| 7.3070207        | 7.193693         | 8.435932         | 8.150463         | 4.9158983        | 5.5526185        |
| 10.266412        | 9.74134          | 9.978375         | 9.950925         | 8.959466         | 8.73072          |
| 10.266412        | 9.74134          | 9.978375         | 9.950925         | 8.959466         | 8.73072          |
| 9.444992         | 10.500728        | 9.914339         | 10.138048        | 8.579748         | 9.215206         |
| 7.316505         | 7.280607         | 7.8162346        | 7.6636105        | 6.87187          | 6.3787045        |
| 4.14684          | 2.8993402        | 5.6731024        | 4.6849294        | 3.2661953        | 2.4279919        |
| 4.9037623        | 3.377954         | 4.33538          | 4.1267853        | 2.8961146        | 2.4279919        |
| 5.560849         | 5.1369796        | 5.7778983        | 5.6347795        | 5.3167114        | 4.4951386        |
| 4.3590403        | 4.5226064        | 3.962995         | 4.1426377        | 3.008656         | 3.356644         |
| 4.3590403        | 4.5226064        | 3.962995         | 4.1426377        | 3.008656         | 3.356644         |
| 6.619415         | 4.209964         | 7.8271074        | 6.6072288        | 6.337456         | 4.726418         |
| 4.1168876        | 5.0393906        | 5.7483354        | 5.4391           | 2.6623921        | 3.252258         |
| 3.7340884        | 3.4836776        | 4.0999346        | 4.4967422        | 3.2238717        | 2.4279919        |
| 5.521252         | 6.4182673        | 4.356733         | 5.492564         | 2.7994356        | 2.4279919        |
| 5.521252         | 6.4182673        | 4.356733         | 5.492564         | 2.7994356        | 2.4279919        |
| 8.922047         | 8.753903         | 8.762941         | 8.919001         | 7.336216         | 7.1282496        |
| 4.2874265        | 3.76308          | 4.6332603        | 4.169465         | 2.3467326        | 2.4279919        |
| 4.2874265        | 3.76308          | 4.6332603        | 4.169465         | 2.3467326        | 2.4279919        |
| 7.4826546        | 6.5351486        | 5.698315         | 5.94557          | 6.2824507        | 3.7756088        |
| 4.6721487        | 4.0761456        | 3.8092117        | 4.0224533        | 2.3467326        | 2.4279919        |
| 8.5281725        | 8.215106         | 10.1589775       | 9.454541         | 7.883546         | 7.506278         |
| 7.7427273        | 8.909478         | 7.6363735        | 8.251866         | 6.4941735        | 6.5322685        |
| 4.0829077        | 4.275234         | 4.5520873        | 4.493335         | 4.0906777        | 2.4279919        |
| 4.0829077        | 4.275234         | 4.5520873        | 4.493335         | 4.0906777        | 2.4279919        |
| 4.0829077        | 4.275234         | 4.5520873        | 4.493335         | 4.0906777        | 2.4279919        |
| 4.2544146        | 4.1396093        | 5.329326         | 4.8225617        | 2.3467326        | 2.4279919        |
| 9.797711         | 10.248859        | 8.563796         | 9.599056         | 8.903383         | 8.899571         |
| 5.149675         | 3.2614124        | 4.9509387        | 4.453799         | 3.918315         | 2.4279919        |
| 6.2093406        | 5.8658195        | 6.5832157        | 6.0768285        | 5.4395046        | 4.857379         |
| 7.4539933        | 6.4931407        | 7.030743         | 6.842569         | 4.991452         | 5.729191         |
| 6.296392         | 5.9305           | 6.103254         | 5.991692         | 4.817898         | 2.4279919        |
| 5.625095         | 5.9359426        | 6.6829767        | 6.4663134        | 4.3484817        | 4.4655905        |
| 3.506844         | 7.0858855        | 5.196118         | 6.2504406        | 4.812683         | 5.1927495        |
| 4.4519744        | 4.7787347        | 4.4027066        | 4.6491885        | 4.527752         | 4.158482         |
| 6.4703364        | 5.677317         | 7.199653         | 6.395189         | 5.4589586        | 5.204162         |
| <b>6.6151643</b> | <b>7.350687</b>  | <b>6.393365</b>  | <b>7.080346</b>  | <b>4.3138666</b> | <b>4.398897</b>  |
| 2.5193186        | 10.1200905       | 4.460094         | 8.707568         | 2.8166542        | 2.4279919        |
| 9.809677         | 10.766919        | 9.66763          | 10.297173        | 7.826436         | 8.583392         |
| 9.809677         | 10.766919        | 9.66763          | 10.297173        | 7.826436         | 8.583392         |
| 9.809677         | 10.766919        | 9.66763          | 10.297173        | 7.826436         | 8.583392         |
| 7.387667         | 7.137956         | 7.560299         | 7.563038         | 6.746698         | 5.7451324        |
| 7.097097         | 7.459026         | 6.9165754        | 7.2419643        | 5.6280966        | 5.6740084        |
| 7.097097         | 7.459026         | 6.9165754        | 7.2419643        | 5.6280966        | 5.6740084        |
| 9.120057         | 9.051258         | 9.927347         | 9.598484         | 7.367963         | 8.199669         |
| 9.223883         | 8.958134         | 10.133249        | 9.566196         | 8.953343         | 8.765599         |
| 8.814412         | 7.5857844        | 8.03762          | 7.8375635        | 6.813386         | 7.1781096        |
| 8.000007         | 8.455187         | 7.984756         | 8.237296         | 6.093305         | 6.9797316        |
| 8.845293         | 8.552278         | 8.525616         | 8.4347           | 7.3688364        | 7.7516103        |
| 8.845293         | 8.552278         | 8.525616         | 8.4347           | 7.3688364        | 7.7516103        |
| 9.184741         | 9.717477         | 10.79365         | 10.568475        | 8.368076         | 8.681705         |
| 5.2653704        | 7.002425         | 6.679782         | 6.70537          | 4.327213         | 4.9900074        |
| 5.2653704        | 7.002425         | 6.679782         | 6.70537          | 4.327213         | 4.9900074        |
| <b>10.327265</b> | <b>11.78335</b>  | <b>10.575918</b> | <b>11.215674</b> | <b>9.372992</b>  | <b>9.628566</b>  |
| 9.899648         | 10.156183        | 9.609886         | 9.909314         | 8.645444         | 9.009822         |
| 3.8681867        | 4.0905347        | 4.718844         | 4.4622335        | 3.3173547        | 3.301185         |
| 3.8681867        | 4.0905347        | 4.718844         | 4.4622335        | 3.3173547        | 3.301185         |
| 3.8681867        | 4.0905347        | 4.718844         | 4.4622335        | 3.3173547        | 3.301185         |
| 9.049915         | 9.27991          | 10.221312        | 9.963567         | 8.257734         | 8.921684         |

|                  |                  |                  |                  |
|------------------|------------------|------------------|------------------|
| 10.511782        | 11.691804        | 11.934742        | 11.796733        |
| 3.7015316        | 5.3344903        | 4.852885         | 4.652274         |
| 9.601361         | 8.78512          | 8.882076         | 8.87462          |
| <b>5.493387</b>  | <b>7.7804074</b> | <b>4.6258116</b> | <b>6.719927</b>  |
| 5.4151297        | 5.294198         | 5.7426953        | 5.339569         |
| 9.176752         | 8.179365         | 8.978088         | 8.533957         |
| 9.176752         | 8.179365         | 8.978088         | 8.533957         |
| 8.363706         | 8.841461         | 8.348345         | 8.600718         |
| 7.0026126        | 6.694112         | 6.3870625        | 6.6132326        |
| 4.1911573        | 2.3408759        | 2.9608014        | 2.352752         |
| 4.0151806        | 2.3408759        | 3.437199         | 2.352752         |
| 5.420487         | 3.7291548        | 4.7790666        | 4.1490726        |
| 3.2557085        | 3.8993936        | 2.8642077        | 3.4677505        |
| 3.2557085        | 3.8993936        | 2.8642077        | 3.4677505        |
| 6.987682         | 3.432223         | 5.870579         | 3.8899095        |
| 2.350709         | 3.6137557        | 4.242465         | 3.426247         |
| 2.350709         | 4.006671         | 2.3618152        | 2.352752         |
| 3.750249         | 2.727484         | 4.3402977        | 3.7270198        |
| 3.750249         | 2.727484         | 4.3402977        | 3.7270198        |
| 7.6501603        | 6.9918776        | 7.948268         | 7.3809814        |
| 2.7586527        | 2.3408759        | 2.3618152        | 2.6704106        |
| 2.7586527        | 2.3408759        | 2.3618152        | 2.6704106        |
| 7.015192         | 4.58052          | 4.844448         | 4.4172745        |
| 3.3972692        | 4.0210915        | 2.3618152        | 3.073688         |
| 9.498456         | 6.4859223        | 6.651796         | 6.6600823        |
| 6.5707603        | 6.8550367        | 7.8107657        | 7.2481155        |
| 4.1159286        | 3.4010706        | 3.0094736        | 3.0334897        |
| 4.1159286        | 3.4010706        | 3.0094736        | 3.0334897        |
| 4.1159286        | 3.4010706        | 3.0094736        | 3.0334897        |
| 4.4921613        | 2.899209         | 2.9821725        | 2.8466237        |
| 8.984114         | 7.8060694        | 7.141159         | 9.40276          |
| 4.9546123        | 2.7595077        | 4.1928           | 2.677483         |
| 6.100109         | 4.7498713        | 4.8921423        | 4.110457         |
| 4.868076         | 5.9137545        | 6.0849648        | 5.8789306        |
| 5.551254         | 3.3318276        | 5.433426         | 4.1709704        |
| 5.0386252        | 3.9503138        | 4.0018587        | 3.5693223        |
| 3.6207082        | 4.105268         | 3.4353662        | 3.2195497        |
| 4.636594         | 3.2791445        | 3.2108774        | 2.9729407        |
| 6.180808         | 3.9726171        | 4.3036833        | 5.0392885        |
| <b>3.3799818</b> | <b>4.1070237</b> | <b>2.8148434</b> | <b>2.8327746</b> |
| 3.029783         | 3.8113515        | 2.3618152        | 3.6700885        |
| 7.2449427        | 9.635363         | 7.8309865        | 8.722115         |
| 7.2449427        | 9.635363         | 7.8309865        | 8.722115         |
| 7.2449427        | 9.635363         | 7.8309865        | 8.722115         |
| 7.5514555        | 6.0635896        | 6.280188         | 6.1791477        |
| 5.400729         | 6.1143775        | 5.560849         | 5.7372837        |
| 5.400729         | 6.1143775        | 5.560849         | 5.7372837        |
| 6.7457557        | 7.7781305        | 8.330459         | 8.120192         |
| 9.061621         | 8.292739         | 8.402716         | 8.407669         |
| 6.6695514        | 7.0485106        | 7.0156317        | 6.9734254        |
| 5.5419273        | 6.883382         | 4.995922         | 6.2696285        |
| 7.220987         | 6.7906613        | 7.859729         | 7.2686057        |
| 7.220987         | 6.7906613        | 7.859729         | 7.2686057        |
| 8.084107         | 8.763752         | 8.819457         | 8.47047          |
| 4.309255         | 3.2195497        | 5.880985         | 5.1790113        |
| 4.309255         | 3.2195497        | 5.880985         | 5.1790113        |
| <b>9.208775</b>  | <b>9.853944</b>  | <b>10.507352</b> | <b>10.226981</b> |
| 8.357478         | 8.4298525        | 8.449027         | 8.347784         |
| 3.813519         | 2.3408759        | 3.8594937        | 2.352752         |
| 3.813519         | 2.3408759        | 3.8594937        | 2.352752         |
| 3.813519         | 2.3408759        | 3.8594937        | 2.352752         |
| 7.5896845        | 7.783832         | 8.452133         | 8.136969         |

|               |             |             |            |    |           |
|---------------|-------------|-------------|------------|----|-----------|
| ASHGA5P051168 | 0.006104865 | 0.049856523 | 4.0762319  | up | noncoding |
| ASHGA5P027784 | 0.002794163 | 0.034179323 | 2.1111857  | up | noncoding |
| ASHGA5P026242 | 0.001915398 | 0.02921028  | 2.6577364  | up | noncoding |
| ASHGA5P019130 | 0.002766248 | 0.034110227 | 2.5123226  | up | noncoding |
| ASHGA5P019130 | 0.002766248 | 0.034110227 | 2.5123226  | up | noncoding |
| ASHGA5P019130 | 0.002766248 | 0.034110227 | 2.5123226  | up | noncoding |
| ASHGA5P019130 | 0.002766248 | 0.034110227 | 2.5123226  | up | noncoding |
| ASHGA5P019130 | 0.002766248 | 0.034110227 | 2.5123226  | up | noncoding |
| ASHGA5P019130 | 0.002766248 | 0.034110227 | 2.5123226  | up | noncoding |
| ASHGA5P023676 | 0.014320729 | 0.073312647 | 2.2296534  | up | noncoding |
| ASHGA5P021984 | 0.014721089 | 0.0741837   | 2.8666456  | up | noncoding |
| ASHGA5P021984 | 0.014721089 | 0.0741837   | 2.8666456  | up | noncoding |
| ASHGA5P021984 | 0.014721089 | 0.0741837   | 2.8666456  | up | noncoding |
| ASHGA5P016221 | 0.000381481 | 0.013977512 | 2.6180707  | up | noncoding |
| ASHGA5P016221 | 0.000381481 | 0.013977512 | 2.6180707  | up | noncoding |
| ASHGA5P028688 | 0.000783512 | 0.018680184 | 3.219742   | up | noncoding |
| ASHGA5P046043 | 0.001647175 | 0.027211232 | 2.6800831  | up | noncoding |
| ASHGA5P046246 | 0.043972835 | 0.134639736 | 2.0977676  | up | noncoding |
| ASHGA5P035933 | 0.028885242 | 0.106084163 | 2.0732178  | up | noncoding |
| ASHGA5P033299 | 0.015925146 | 0.077147596 | 3.2959495  | up | noncoding |
| ASHGA5P033015 | 0.007945462 | 0.056185826 | 2.0135183  | up | noncoding |
| ASHGA5P047378 | 0.001219438 | 0.023487681 | 2.2256098  | up | noncoding |
| ASHGA5P047378 | 0.001219438 | 0.023487681 | 2.2256098  | up | noncoding |
| ASHGA5P049732 | 0.001040226 | 0.021859875 | 4.4783382  | up | noncoding |
| ASHGA5P017559 | 7.06167E-05 | 0.008148697 | 2.6906579  | up | noncoding |
| ASHGA5P054035 | 6.04143E-05 | 0.007803818 | 2.0235081  | up | noncoding |
| ASHGA5P013446 | 0.001644141 | 0.027211232 | 2.5845256  | up | noncoding |
| ASHGA5P013446 | 0.001644141 | 0.027211232 | 2.5845256  | up | noncoding |
| ASHGA5P013446 | 0.001644141 | 0.027211232 | 2.5845256  | up | noncoding |
| ASHGA5P013446 | 0.001644141 | 0.027211232 | 2.5845256  | up | noncoding |
| ASHGA5P013446 | 0.001644141 | 0.027211232 | 2.5845256  | up | noncoding |
| ASHGA5P013446 | 0.001644141 | 0.027211232 | 2.5845256  | up | noncoding |
| ASHGA5P013446 | 0.001644141 | 0.027211232 | 2.5845256  | up | noncoding |
| ASHGA5P013446 | 0.001644141 | 0.027211232 | 2.5845256  | up | noncoding |
| ASHGA5P051627 | 0.004243582 | 0.041329133 | 2.2736954  | up | noncoding |
| ASHGA5P051627 | 0.004243582 | 0.041329133 | 2.2736954  | up | noncoding |
| ASHGA5P057368 | 0.006373145 | 0.050835376 | 2.3153823  | up | noncoding |
| ASHGA5P017167 | 0.001366125 | 0.024734332 | 2.2685308  | up | noncoding |
| ASHGA5P028561 | 0.000265166 | 0.012239337 | 3.4052835  | up | noncoding |
| ASHGA5P034923 | 0.002328801 | 0.031698104 | 2.8003409  | up | noncoding |
| ASHGA5P050607 | 0.003092283 | 0.035994844 | 2.326086   | up | noncoding |
| ASHGA5P044545 | 0.018093394 | 0.081727179 | 2.1407286  | up | noncoding |
| ASHGA5P029033 | 0.001845774 | 0.028874356 | 2.3747957  | up | noncoding |
| ASHGA5P035008 | 0.015165646 | 0.075388329 | 18.6183457 | up | noncoding |
| ASHGA5P040074 | 0.004201296 | 0.041263975 | 4.3477601  | up | noncoding |
| ASHGA5P049521 | 0.000195915 | 0.01146874  | 3.6506345  | up | noncoding |
| ASHGA5P022339 | 0.022582563 | 0.092978491 | 2.6094926  | up | noncoding |
| ASHGA5P028010 | 0.004691292 | 0.04352049  | 3.8355519  | up | noncoding |
| ASHGA5P053209 | 0.03602431  | 0.120468465 | 2.9347867  | up | noncoding |
| ASHGA5P007948 | 0.026853323 | 0.102230927 | 2.614317   | up | noncoding |
| ASHGA5P007948 | 0.026853323 | 0.102230927 | 2.614317   | up | noncoding |
| ASHGA5P026990 | 0.026164773 | 0.100745216 | 2.0821929  | up | noncoding |
| ASHGA5P036781 | 0.000626005 | 0.0169305   | 2.3618568  | up | noncoding |
| ASHGA5P043456 | 0.008496024 | 0.057580891 | 2.0482363  | up | noncoding |
| ASHGA5P033432 | 5.0087E-05  | 0.007392592 | 3.0655174  | up | noncoding |
| ASHGA5P033432 | 5.0087E-05  | 0.007392592 | 3.0655174  | up | noncoding |
| ASHGA5P023928 | 0.043208986 | 0.133288439 | 2.0824095  | up | noncoding |
| ASHGA5P026006 | 0.004126711 | 0.041046245 | 2.1510514  | up | noncoding |
| ASHGA5P026006 | 0.004126711 | 0.041046245 | 2.1510514  | up | noncoding |
| ASHGA5P026006 | 0.004126711 | 0.041046245 | 2.1510514  | up | noncoding |
| ASHGA5P026006 | 0.004126711 | 0.041046245 | 2.1510514  | up | noncoding |
| ASHGA5P031786 | 0.001087985 | 0.022286303 | 9.8893522  | up | noncoding |
| ASHGA5P053490 | 0.001778983 | 0.028224023 | 2.5048662  | up | noncoding |
| ASHGA5P037208 | 0.00088743  | 0.020090144 | 3.3076784  | up | noncoding |
| ASHGA5P055834 | 0.000656504 | 0.017168766 | 8.8708804  | up | noncoding |

|                 |                |                     |       |       |   |
|-----------------|----------------|---------------------|-------|-------|---|
| ENST00000444998 | MCM3AP-AS1     | GENCODE             | 2193  | chr21 | + |
| N54862          |                | LincRNAs identified | 415   | chrX  | + |
| ENST00000528646 | RP11-583F24.8  | GENCODE             | 707   | chr11 | + |
| NR_037667       | INTS7          | RefSeq              | 4589  | chr1  | - |
| NR_037667       | INTS7          | RefSeq              | 4589  | chr1  | - |
| NR_037667       | INTS7          | RefSeq              | 4589  | chr1  | - |
| NR_037667       | INTS7          | RefSeq              | 4589  | chr1  | - |
| NR_037667       | INTS7          | RefSeq              | 4589  | chr1  | - |
| HMLincRNA1441+  | HMLincRNA1441  | LincRNAs identified | 7848  | chr8  | + |
| ENST00000546421 | RP11-181C3.2   | GENCODE             | 738   | chr12 | - |
| ENST00000546421 | RP11-181C3.2   | GENCODE             | 738   | chr12 | - |
| ENST00000546421 | RP11-181C3.2   | GENCODE             | 738   | chr12 | - |
| NR_045512       | WBSCR22        | RefSeq              | 1159  | chr7  | + |
| NR_045512       | WBSCR22        | RefSeq              | 1159  | chr7  | + |
| ENST00000412194 | BX248398.1     | GENCODE             | 373   | chr1  | - |
| ENST00000423793 | RP11-432J22.2  | GENCODE             | 311   | chr9  | + |
| TCONS_00001509  | XLOC_000852    | LincRNAs identified | 503   | chr1  | - |
| ENST00000441587 | ALMS1-IT1      | GENCODE             | 1766  | chr2  | + |
| uc002jcf.3      | TCAM1P         | UCSC_knowngene      | 3291  | chr17 | + |
| ENST00000582557 | SUZ12P1        | GENCODE             | 1560  | chr17 | + |
| ENST00000418966 | ZNF32-AS2      | GENCODE             | 905   | chr10 | + |
| ENST00000418966 | ZNF32-AS2      | GENCODE             | 905   | chr10 | + |
| ENST00000492522 | CTD-2377D24.6  | GENCODE             | 695   | chr17 | + |
| uc003tui.3      | CCT6P1         | UCSC_knowngene      | 1528  | chr7  | + |
| ENST00000453317 | JPX            | GENCODE             | 483   | chrX  | + |
| NR_029416       | SHMT2          | RefSeq              | 2176  | chr12 | + |
| NR_029416       | SHMT2          | RefSeq              | 2176  | chr12 | + |
| NR_029416       | SHMT2          | RefSeq              | 2176  | chr12 | + |
| NR_029416       | SHMT2          | RefSeq              | 2176  | chr12 | + |
| NR_029416       | SHMT2          | RefSeq              | 2176  | chr12 | + |
| NR_029416       | SHMT2          | RefSeq              | 2176  | chr12 | + |
| ENST00000469070 | RP11-18H7.1    | GENCODE             | 982   | chr3  | + |
| ENST00000469070 | RP11-18H7.1    | GENCODE             | 982   | chr3  | + |
| TCONS_00016364  | XLOC_007744    | LincRNAs identified | 414   | chr9  | - |
| NR_038429       | LOC100506054   | RefSeq              | 1329  | chr2  | + |
| ENST00000449579 | DLEU2          | GENCODE             | 791   | chr13 | - |
| ENST00000423706 | AC012506.1     | GENCODE             | 525   | chr2  | - |
| ENST00000440975 | AC012487.2     | GENCODE             | 574   | chr2  | - |
| ENST00000429151 | AF230666.2     | GENCODE             | 773   | chr8  | - |
| NR_023922       | DHRS4-AS1      | RefSeq              | 2770  | chr14 | - |
| ENST00000444871 | RP11-89K21.1   | GENCODE             | 581   | chr2  | - |
| ENST00000420701 | AC113617.1     | GENCODE             | 597   | chr4  | + |
| NR_045026       | C17orf76-AS1   | RefSeq              | 552   | chr17 | + |
| ENST00000554841 | RP1-261D10.2   | GENCODE             | 525   | chr14 | - |
| NR_027358       | LINC00592      | RefSeq              | 1075  | chr12 | + |
| ENST00000425474 | AZGP1P1        | GENCODE             | 1181  | chr7  | + |
| NR_026675       | CRYM-AS1       | RefSeq              | 2304  | chr16 | + |
| NR_026675       | CRYM-AS1       | RefSeq              | 2304  | chr16 | + |
| ENST00000543308 | RP11-1038A11.2 | GENCODE             | 1727  | chr12 | - |
| ENST00000424235 | RP4-564F22.2   | GENCODE             | 764   | chr20 | - |
| uc003sio.1      | AK024243       | UCSC_knowngene      | 4411  | chr7  | + |
| ENST00000583521 | RP11-498C9.13  | GENCODE             | 450   | chr17 | + |
| ENST00000583521 | RP11-498C9.13  | GENCODE             | 450   | chr17 | + |
| HMLincRNA971+   | HMLincRNA971   | LincRNAs identified | 12189 | chr3  | + |
| NR_052023       | EIF6           | RefSeq              | 1128  | chr20 | - |
| NR_052023       | EIF6           | RefSeq              | 1128  | chr20 | - |
| NR_052023       | EIF6           | RefSeq              | 1128  | chr20 | - |
| NR_052023       | EIF6           | RefSeq              | 1128  | chr20 | - |
| ENST00000560487 | CTD-3032H12.2  | GENCODE             | 359   | chr16 | + |
| ENST00000523859 | RP11-37B2.1    | GENCODE             | 696   | chr8  | - |
| TCONS_00025773  | XLOC_012582    | LincRNAs identified | 857   | chr17 | - |
| uc001vnl.3      | AF339817       | UCSC_knowngene      | 6082  | chr13 | + |

|           |           |                   |                            |                       |
|-----------|-----------|-------------------|----------------------------|-----------------------|
| 47649153  | 47662913  | ENST00000421927,  | GCAGAAGGATGA 114044        | natural antisense     |
| 64070590  | 64070929  |                   | TTTCAGTAGAACTGGTAAACAGTTC  | intergenic            |
| 18956531  | 18961268  |                   | TGAGATGATTCTTGGCCTCTGTCCC  | natural antisense     |
| 212113740 | 212209002 |                   | GTCTGTGAAGTA(25896         | exon sense-overlappi  |
| 212113740 | 212209002 |                   | GTCTGTGAAGTA(25896         | exon sense-overlappi  |
| 212113740 | 212209002 |                   | GTCTGTGAAGTA(25896         | exon sense-overlappi  |
| 212113740 | 212209002 |                   | GTCTGTGAAGTA(25896         | exon sense-overlappi  |
| 212113740 | 212209002 |                   | GTCTGTGAAGTA(25896         | natural antisense     |
| 30192504  | 30200352  |                   | TCATCCATACATCCAAACTTCAGAG  | intergenic            |
| 98909071  | 98909988  |                   | GCGAGAGGAGACGCCGATAAGGGA   | natural antisense     |
| 98909071  | 98909988  |                   | GCGAGAGGAGACGCCGATAAGGGA   | natural antisense     |
| 98909071  | 98909988  |                   | GCGAGAGGAGACGCCGATAAGGGA   | natural antisense     |
| 73097897  | 73112551  |                   | GTTGCATCAGGT(114049        | exon sense-overlappi  |
| 73097897  | 73112551  |                   | GTTGCATCAGGT(114049        | exon sense-overlappi  |
| 144325838 | 144336254 | ENST00000444883   | CCCGTTCTACTTTTTTCAGCTTGTTC | intergenic            |
| 138799657 | 138805359 |                   | AGATTGTCTATTTTTTCTTGAGTCAC | bidirectional         |
| 59761065  | 59761673  |                   | GTTTAGCAGTCGCTGAGTCCAAACA  | intergenic            |
| 73684229  | 73686609  |                   | CAAACCAAACAAAACCATGAATC    | intron sense-overlapp |
| 61934375  | 61941739  | ENST00000478379   | CTCCCAAATCAG1146771        | intergenic            |
| 29061080  | 29097068  |                   | GCGTGATTTCCATAGCAGATGACAA  | intergenic            |
| 44141389  | 44143467  |                   | CACAGGTCTGAG(414208        | natural antisense     |
| 44141389  | 44143467  |                   | CACAGGTCTGAG(414208        | natural antisense     |
| 46782622  | 46783692  |                   | GGCAGATCGGGTATATCTTTAAAGA  | intergenic            |
| 65216091  | 65228662  |                   | CCATAAAGATGG(643253        | intergenic            |
| 73164180  | 73164781  |                   | GTTGCAGAAGGTAGCTCCTAGGAGC  | intergenic            |
| 57623827  | 57628718  | NR_029415, NR_02' | TGCCTCAGAGAT/6472          | exon sense-overlappi  |
| 57623827  | 57628718  | NR_029415, NR_02' | TGCCTCAGAGAT/6472          | exon sense-overlappi  |
| 57623827  | 57628718  | NR_029415, NR_02' | TGCCTCAGAGAT/6472          | exon sense-overlappi  |
| 57623827  | 57628718  | NR_029415, NR_02' | TGCCTCAGAGAT/6472          | exon sense-overlappi  |
| 57623827  | 57628718  | NR_029415, NR_02' | TGCCTCAGAGAT/6472          | exon sense-overlappi  |
| 57623827  | 57628718  | NR_029415, NR_02' | TGCCTCAGAGAT/6472          | natural antisense     |
| 119814116 | 119818033 |                   | AAGAGGGGAGGTAAATTACTTTCCA  | bidirectional         |
| 119814116 | 119818033 |                   | AAGAGGGGAGGTAAATTACTTTCCA  | bidirectional         |
| 81484524  | 81496832  |                   | CAGACTCAAGGTCTCTCTGAGCAC   | intergenic            |
| 3605975   | 3609340   |                   | AGTTGAGAAGGC 100506054     | natural antisense     |
| 50623325  | 50656114  | uc001veb.2        | CTGTGCTGGGCACAGAATGGACTTC  | bidirectional         |
| 23553534  | 23554915  |                   | ATCCTGGATCACTCTGAGAGGTCAC  | intergenic            |
| 109128144 | 109150638 |                   | GGAAATTGTGGTGTACTTGTGTAAG  | bidirectional         |
| 133850374 | 133856543 |                   | CCAGGAAAAGTCACACCTCTTCCC   | natural antisense     |
| 24407939  | 24424298  |                   | TTTATTATGACCT 55449        | natural antisense     |
| 45158260  | 45166027  |                   | GGCAAACACTATGTCCTTTTCTTTTI | intergenic            |
| 118281780 | 118293754 | ENST00000448804   | GGCTGTTCCATATATATATATATGG  | intergenic            |
| 16342300  | 16344525  | ENST00000460249,  | ATGATCCCTTCA/125144        | intergenic            |
| 71759434  | 71762079  |                   | AGCCTGGATTCTTTAACAGTGATGT  | intergenic            |
| 52604713  | 52617597  |                   | CCCCTTATACAA/283404        | bidirectional         |
| 99578384  | 99581860  |                   | ATGGAGACCCTG.646282        | intergenic            |
| 21312169  | 21329912  |                   | GGGTACCTAGAG'400508        | intronic antisense    |
| 21312169  | 21329912  |                   | GGGTACCTAGAG'400508        | intronic antisense    |
| 5475213   | 5476940   |                   | ATTTAAGATGTAGCAACTGGTATAA  | intergenic            |
| 37059422  | 37063977  |                   | CTGAGCTTGATTGGGGCTCTGAGAG  | intergenic            |
| 149596    | 154868    |                   | GGGCTCCTAGTCGTTTTATTTTTAGC | intergenic            |
| 79890273  | 79890934  |                   | TGAGGTTGGGGAATCCACCCCTGTT  | natural antisense     |
| 79890273  | 79890934  |                   | TGAGGTTGGGGAATCCACCCCTGTT  | natural antisense     |
| 182007053 | 182019242 |                   | AACTTAGATCTTTTCACATCCTTTCA | intergenic            |
| 33866708  | 33872619  |                   | ATGTGTGTGGGC.3692          | exon sense-overlappi  |
| 33866708  | 33872619  |                   | ATGTGTGTGGGC.3692          | exon sense-overlappi  |
| 33866708  | 33872619  |                   | ATGTGTGTGGGC.3692          | exon sense-overlappi  |
| 33866708  | 33872619  |                   | ATGTGTGTGGGC.3692          | exon sense-overlappi  |
| 54968824  | 54988577  |                   | CCAACCTCAATGCGTAGTGCTCATT  | intergenic            |
| 90768462  | 90769592  | ENST00000504145,  | GAGAGGTGGATGATAAACCCCTGTCA | bidirectional         |
| 76613497  | 76614757  | TCONS_00025772    | GGATTGCAAGACAGTAGTTCCTGT   | intergenic            |
| 99053669  | 99059751  |                   | GTAAGAACAAGGTAGCACATTCATT  | intron sense-overlapp |

|                 |           |                         |           |           |
|-----------------|-----------|-------------------------|-----------|-----------|
| NM_003906       | MCM3AP    | 80 kDa MCM3-assoc-      | 47655047  | 47705236  |
| NM_147199       | MRGPRX1   | mas-related G-protein-  | 18955359  | 18956549  |
| NM_001199809    | INTS7     | integrator complex su-  | 212113740 | 212209002 |
| NM_001199811    | INTS7     | integrator complex su-  | 212113740 | 212209002 |
| NM_001199812    | INTS7     | integrator complex su-  | 212113740 | 212209002 |
| NM_015434       | INTS7     | integrator complex su-  | 212113740 | 212209002 |
| NM_016448       | DTL       | denticleless protein h+ | 212208918 | 212278187 |
| NM_001032283    | TMPO      | thymopoietin isoform+   | 98909350  | 98944157  |
| NM_001032284    | TMPO      | thymopoietin isoform+   | 98909350  | 98944157  |
| NM_003276       | TMPO      | thymopoietin isoform+   | 98909350  | 98929412  |
| NM_001202560    | WBSCR22   | uncharacterized meth+   | 73097897  | 73112551  |
| NM_017528       | WBSCR22   | uncharacterized meth+   | 73097897  | 73112551  |
| NM_015447       | CAMSAP1   | calmodulin-regulated-   | 138700332 | 138799005 |
| NM_015120       | ALMS1     | Alstrom syndrome pr+    | 73612885  | 73837046  |
| NM_001005368    | ZNF32     | zinc finger protein 32- | 44139306  | 44144152  |
| NM_006973       | ZNF32     | zinc finger protein 32- | 44139306  | 44144326  |
| NM_001166356    | SHMT2     | serine hydroxymethyl+   | 57623355  | 57628718  |
| NM_001166357    | SHMT2     | serine hydroxymethyl+   | 57624142  | 57628718  |
| NM_001166358    | SHMT2     | serine hydroxymethyl+   | 57623827  | 57628718  |
| NM_001166359    | SHMT2     | serine hydroxymethyl+   | 57624110  | 57628718  |
| NM_005412       | SHMT2     | serine hydroxymethyl+   | 57623355  | 57628718  |
| NM_020142       | NDUFA4L2  | NADH dehydrogenase-     | 57628685  | 57634475  |
| NM_001146156    | GSK3B     | glycogen synthase ki-   | 119540801 | 119813264 |
| NM_002093       | GSK3B     | glycogen synthase ki-   | 119540801 | 119813264 |
| ENST00000315212 | RNASEH1   | ribonuclease H1 [Sou-   | 3592704   | 3606206   |
| ENST00000378180 | DLEU1     | deleted in lymphocyt+   | 50656306  | 50679433  |
| NM_001193483    | LIMS1     | LIM and senescent c+    | 109150810 | 109303702 |
| NM_016018       | PHF20L1   | PHD finger protein 2+   | 133787603 | 133861052 |
| NM_021004       | DHRS4     | dehydrogenase/reduc+    | 24422964  | 24438488  |
| NM_001242696    | LOC283403 | uncharacterized prote-  | 52599364  | 52604639  |
| NM_001014444    | CRYM      | thiomorpholine-carbo-   | 21269838  | 21314404  |
| NM_001888       | CRYM      | thiomorpholine-carbo-   | 21269838  | 21314404  |
| NM_006907       | PYCR1     | pyrroline-5-carboxyl:-  | 79890268  | 79894968  |
| NM_153824       | PYCR1     | pyrroline-5-carboxyl:-  | 79890266  | 79894968  |
| NM_001267810    | EIF6      | eukaryotic translatior- | 33866708  | 33872520  |
| NM_002212       | EIF6      | eukaryotic translatior- | 33866708  | 33872619  |
| NM_181466       | EIF6      | eukaryotic translatior- | 33866708  | 33872619  |
| NM_181468       | EIF6      | eukaryotic translatior- | 33866708  | 33872520  |
| NM_003821       | RIPK2     | receptor-interacting s+ | 90769974  | 90803292  |
| NM_005766       | FARP1     | FERM, RhoGEF and+       | 98795433  | 99102023  |



|             |            |           |          |           |           |
|-------------|------------|-----------|----------|-----------|-----------|
| 40.037812   | 6.831844   | 4.875043  | 2.847806 | 50.272453 | 60.374695 |
| 17.135352   | 5.826154   | 3.787476  | 2.709423 | 19.421278 | 17.735922 |
| 1772.217933 | 413.472578 | 10.349817 | 8.939619 | 2132.4219 | 2327.3372 |
| 68.158755   | 18.642617  | 5.730823  | 4.401801 | 65.4348   | 75.46517  |
| 68.158755   | 18.642617  | 5.730823  | 4.401801 | 65.4348   | 75.46517  |
| 68.158755   | 18.642617  | 5.730823  | 4.401801 | 65.4348   | 75.46517  |
| 68.158755   | 18.642617  | 5.730823  | 4.401801 | 65.4348   | 75.46517  |
| 68.158755   | 18.642617  | 5.730823  | 4.401801 | 65.4348   | 75.46517  |
| 236.555358  | 72.922087  | 7.465223  | 6.308404 | 318.53238 | 225.38623 |
| 34.718673   | 8.693894   | 4.729795  | 3.210432 | 41.13226  | 48.681538 |
| 34.718673   | 8.693894   | 4.729795  | 3.210432 | 41.13226  | 48.681538 |
| 34.718673   | 8.693894   | 4.729795  | 3.210432 | 41.13226  | 48.681538 |
| 670.958088  | 153.584382 | 8.998233  | 7.609729 | 687.6735  | 694.9137  |
| 670.958088  | 153.584382 | 8.998233  | 7.609729 | 687.6735  | 694.9137  |
| 347.2092    | 62.976766  | 7.860359  | 6.173414 | 501.61877 | 189.65292 |
| 105.676834  | 24.641857  | 6.331279  | 4.909001 | 101.57361 | 117.97892 |
| 45.156618   | 15.515491  | 4.976911  | 3.908056 | 62.985184 | 26.060883 |
| 118.075068  | 37.243241  | 6.39837   | 5.346498 | 171.3472  | 106.83917 |
| 112.401943  | 17.65939   | 6.017158  | 4.296464 | 67.890594 | 20.416769 |
| 1016.649677 | 349.748819 | 9.535393  | 8.525675 | 1075.6887 | 535.75146 |
| 200.250137  | 56.473994  | 7.219275  | 6.065074 | 270.4142  | 261.10397 |
| 200.250137  | 56.473994  | 7.219275  | 6.065074 | 270.4142  | 261.10397 |
| 54.691326   | 10.253475  | 5.388484  | 3.225521 | 56.643303 | 45.873966 |
| 650.278798  | 148.67072  | 8.953466  | 7.525507 | 643.547   | 582.5828  |
| 130.941685  | 40.135175  | 6.657748  | 5.640889 | 141.30655 | 157.15843 |
| 307.607698  | 67.404581  | 7.771018  | 6.401119 | 334.92435 | 486.07544 |
| 307.607698  | 67.404581  | 7.771018  | 6.401119 | 334.92435 | 486.07544 |
| 307.607698  | 67.404581  | 7.771018  | 6.401119 | 334.92435 | 486.07544 |
| 307.607698  | 67.404581  | 7.771018  | 6.401119 | 334.92435 | 486.07544 |
| 307.607698  | 67.404581  | 7.771018  | 6.401119 | 334.92435 | 486.07544 |
| 307.607698  | 67.404581  | 7.771018  | 6.401119 | 334.92435 | 486.07544 |
| 2650.854283 | 667.652432 | 10.862157 | 9.677118 | 2059.2402 | 2272.2295 |
| 2650.854283 | 667.652432 | 10.862157 | 9.677118 | 2059.2402 | 2272.2295 |
| 41.705489   | 12.697154  | 5.027897  | 3.816646 | 55.127686 | 50.96505  |
| 96.906686   | 27.137963  | 6.209877  | 5.028119 | 112.02562 | 135.24818 |
| 170.80498   | 31.765003  | 7.057467  | 5.289692 | 180.13559 | 176.08327 |
| 34.334838   | 9.132209   | 4.784097  | 3.298494 | 33.29673  | 34.109123 |
| 29.022404   | 8.65133    | 4.529321  | 3.311416 | 28.798388 | 23.88744  |
| 308.44192   | 84.478032  | 7.775983  | 6.677881 | 216.58078 | 625.24164 |
| 52.19061    | 14.464938  | 5.346019  | 4.098216 | 60.947124 | 68.019806 |
| 1215.345877 | 22.299157  | 8.907627  | 4.688974 | 1681.6914 | 182.93506 |
| 76.527576   | 8.347788   | 5.296491  | 3.176219 | 26.096722 | 10.908359 |
| 3661.29385  | 522.971403 | 11.257388 | 9.38924  | 3994.498  | 6142.8564 |
| 250.49974   | 60.941516  | 7.521707  | 6.137938 | 339.528   | 330.8167  |
| 50.219098   | 8.265752   | 5.063076  | 3.123642 | 40.549023 | 14.131311 |
| 274.958873  | 45.278357  | 7.025504  | 5.472248 | 461.56604 | 742.6537  |
| 86.640568   | 22.520849  | 6.029166  | 4.642732 | 88.305466 | 126.22627 |
| 86.640568   | 22.520849  | 6.029166  | 4.642732 | 88.305466 | 126.22627 |
| 31.711949   | 9.711804   | 4.577057  | 3.518953 | 30.815144 | 32.34446  |
| 110.24791   | 28.915263  | 6.399284  | 5.159363 | 112.85112 | 117.76573 |
| 43.362756   | 14.569394  | 5.063392  | 4.02901  | 49.90696  | 39.355293 |
| 34.867152   | 7.511489   | 4.787151  | 3.171021 | 40.2603   | 33.625107 |
| 34.867152   | 7.511489   | 4.787151  | 3.171021 | 40.2603   | 33.625107 |
| 44.088035   | 14.890173  | 4.9889    | 3.930646 | 77.88084  | 42.26025  |
| 1188.701717 | 341.115922 | 9.799786  | 8.694745 | 1399.874  | 1351.6241 |
| 1188.701717 | 341.115922 | 9.799786  | 8.694745 | 1399.874  | 1351.6241 |
| 1188.701717 | 341.115922 | 9.799786  | 8.694745 | 1399.874  | 1351.6241 |
| 1188.701717 | 341.115922 | 9.799786  | 8.694745 | 1399.874  | 1351.6241 |
| 268.31491   | 9.491934   | 6.390406  | 3.08453  | 61.008656 | 16.17564  |
| 323.833545  | 72.544101  | 7.803659  | 6.478926 | 223.73245 | 168.5467  |
| 514.911167  | 95.712944  | 8.562426  | 6.836607 | 694.18097 | 692.7842  |
| 80.941143   | 5.650376   | 5.73081   | 2.581733 | 129.7209  | 39.128223 |

|            |           |           |           |           |            |
|------------|-----------|-----------|-----------|-----------|------------|
| 16.8551    | 32.251022 | 33.56408  | 46.90952  | 5.9317    | 4.9999995  |
| 14.640571  | 20.277452 | 14.553369 | 16.183523 | 4.9999995 | 5.6978     |
| 1625.586   | 1823.2882 | 1135.1058 | 1589.5685 | 510.08627 | 283.74625  |
| 54.569244  | 57.39496  | 75.07382  | 81.014534 | 23.057703 | 10.371439  |
| 54.569244  | 57.39496  | 75.07382  | 81.014534 | 23.057703 | 10.371439  |
| 54.569244  | 57.39496  | 75.07382  | 81.014534 | 23.057703 | 10.371439  |
| 54.569244  | 57.39496  | 75.07382  | 81.014534 | 23.057703 | 10.371439  |
| 54.569244  | 57.39496  | 75.07382  | 81.014534 | 23.057703 | 10.371439  |
| 232.33975  | 307.42783 | 118.67549 | 216.97047 | 70.04434  | 47.07543   |
| 23.05387   | 40.734394 | 19.241108 | 35.46887  | 11.201732 | 4.9999995  |
| 23.05387   | 40.734394 | 19.241108 | 35.46887  | 11.201732 | 4.9999995  |
| 23.05387   | 40.734394 | 19.241108 | 35.46887  | 11.201732 | 4.9999995  |
| 668.75635  | 723.6797  | 526.21893 | 724.50635 | 157.97737 | 154.35742  |
| 668.75635  | 723.6797  | 526.21893 | 724.50635 | 157.97737 | 154.35742  |
| 699.2438   | 145.22778 | 278.44733 | 269.0646  | 75.437515 | 45.582508  |
| 60.131676  | 100.34588 | 110.6484  | 143.38252 | 25.886337 | 33.522892  |
| 83.172905  | 55.09082  | 15.284919 | 28.344997 | 18.012571 | 6.536799   |
| 187.83969  | 114.88747 | 43.43944  | 84.09744  | 47.681206 | 26.72182   |
| 119.116486 | 264.35788 | 35.185577 | 167.44435 | 13.667409 | 12.193449  |
| 1258.6003  | 1308.7903 | 743.5634  | 1177.5039 | 351.22183 | 103.374374 |
| 180.56555  | 200.7017  | 94.69683  | 194.01857 | 77.64741  | 51.732     |
| 180.56555  | 200.7017  | 94.69683  | 194.01857 | 77.64741  | 51.732     |
| 47.00952   | 36.144638 | 68.97457  | 73.50196  | 4.9999995 | 4.9999995  |
| 601.1407   | 689.1999  | 588.81305 | 796.38934 | 152.85103 | 112.463905 |
| 135.99663  | 87.97118  | 133.26082 | 129.9565  | 47.364567 | 38.84547   |
| 131.6688   | 194.40936 | 356.2197  | 342.34854 | 66.9885   | 88.603966  |
| 131.6688   | 194.40936 | 356.2197  | 342.34854 | 66.9885   | 88.603966  |
| 131.6688   | 194.40936 | 356.2197  | 342.34854 | 66.9885   | 88.603966  |
| 131.6688   | 194.40936 | 356.2197  | 342.34854 | 66.9885   | 88.603966  |
| 131.6688   | 194.40936 | 356.2197  | 342.34854 | 66.9885   | 88.603966  |
| 131.6688   | 194.40936 | 356.2197  | 342.34854 | 66.9885   | 88.603966  |
| 131.6688   | 194.40936 | 356.2197  | 342.34854 | 66.9885   | 88.603966  |
| 1642.2494  | 4285.3066 | 1983.8239 | 3662.2761 | 551.3971  | 314.89     |
| 1642.2494  | 4285.3066 | 1983.8239 | 3662.2761 | 551.3971  | 314.89     |
| 33.009315  | 37.571056 | 35.308098 | 38.251728 | 10.818241 | 8.468103   |
| 64.28922   | 77.103905 | 89.495674 | 103.27752 | 26.17869  | 36.62752   |
| 176.12343  | 142.12689 | 150.58508 | 199.77562 | 35.4599   | 33.812145  |
| 35.45471   | 35.477825 | 32.328995 | 35.341644 | 7.62253   | 4.9999995  |
| 26.28726   | 37.088074 | 21.832447 | 36.240814 | 7.799296  | 9.7194805  |
| 247.63095  | 182.35034 | 290.78256 | 288.06525 | 86.74403  | 45.696003  |
| 48.710976  | 57.438816 | 38.650307 | 39.376633 | 12.303448 | 9.948744   |
| 2973.0486  | 47.7859   | 1354.6466 | 1051.9677 | 17.695988 | 25.00003   |
| 34.988617  | 215.92072 | 43.66661  | 127.58443 | 7.357041  | 4.9999995  |
| 1594.3597  | 1780.6747 | 4295.491  | 4159.8833 | 525.84265 | 468.84515  |
| 297.89545  | 122.28673 | 202.30779 | 210.16377 | 36.370785 | 36.88919   |
| 55.070248  | 24.543531 | 83.37892  | 83.641556 | 5.3744483 | 4.9999995  |
| 70.94139   | 34.768696 | 186.93358 | 152.88983 | 69.397705 | 104.83638  |
| 70.4396    | 101.34652 | 44.38505  | 89.1405   | 19.530653 | 10.077979  |
| 70.4396    | 101.34652 | 44.38505  | 89.1405   | 19.530653 | 10.077979  |
| 16.907341  | 54.843758 | 19.327581 | 36.03341  | 7.062478  | 8.032354   |
| 65.65369   | 101.45879 | 116.48138 | 147.27675 | 25.376774 | 28.671265  |
| 43.54297   | 52.42647  | 21.31461  | 53.630234 | 21.28663  | 13.219311  |
| 38.012466  | 28.020136 | 29.71823  | 39.566673 | 6.651694  | 7.2578444  |
| 38.012466  | 28.020136 | 29.71823  | 39.566673 | 6.651694  | 7.2578444  |
| 59.961018  | 43.09852  | 21.611227 | 19.716356 | 18.298338 | 5.8172097  |
| 1253.7899  | 1166.8506 | 821.3006  | 1138.7711 | 353.526   | 185.4167   |
| 1253.7899  | 1166.8506 | 821.3006  | 1138.7711 | 353.526   | 185.4167   |
| 1253.7899  | 1166.8506 | 821.3006  | 1138.7711 | 353.526   | 185.4167   |
| 1253.7899  | 1166.8506 | 821.3006  | 1138.7711 | 353.526   | 185.4167   |
| 94.87556   | 933.6107  | 29.112125 | 475.10678 | 4.9999995 | 4.9999995  |
| 204.44832  | 639.54364 | 234.23422 | 472.49594 | 55.61591  | 65.90955   |
| 470.00665  | 278.20428 | 506.5902  | 447.7007  | 92.84358  | 48.679302  |
| 177.07391  | 38.19937  | 46.372948 | 55.15151  | 5.439171  | 4.9999995  |

|           |            |            |            |            |            |
|-----------|------------|------------|------------|------------|------------|
| 11.361469 | 6.038408   | 7.659488   | 4.9999995  | 5.1884604  | 5.753668   |
| 8.982451  | 4.9999995  | 4.9999995  | 5.2766743  | 3.8205779  | 4.14771    |
| 772.824   | 221.76556  | 285.93115  | 406.48224  | 10.583677  | 10.761944  |
| 31.714602 | 14.61185   | 20.16885   | 11.931257  | 5.570574   | 6.050665   |
| 31.714602 | 14.61185   | 20.16885   | 11.931257  | 5.570574   | 6.050665   |
| 31.714602 | 14.61185   | 20.16885   | 11.931257  | 5.570574   | 6.050665   |
| 31.714602 | 14.61185   | 20.16885   | 11.931257  | 5.570574   | 6.050665   |
| 31.714602 | 14.61185   | 20.16885   | 11.931257  | 5.570574   | 6.050665   |
| 138.29358 | 52.355648  | 23.618233  | 106.14529  | 7.8612537  | 7.559444   |
| 11.843279 | 6.4537134  | 11.605099  | 6.0595393  | 4.8995256  | 5.476765   |
| 11.843279 | 6.4537134  | 11.605099  | 6.0595393  | 4.8995256  | 5.476765   |
| 11.843279 | 6.4537134  | 11.605099  | 6.0595393  | 4.8995256  | 5.476765   |
| 142.5774  | 130.99821  | 196.63225  | 138.96364  | 8.9556465  | 9.116504   |
| 142.5774  | 130.99821  | 196.63225  | 138.96364  | 8.9556465  | 9.116504   |
| 125.89549 | 47.41436   | 40.41776   | 43.112965  | 8.488871   | 7.324397   |
| 25.192959 | 25.712206  | 17.210077  | 20.326672  | 6.218515   | 6.6592035  |
| 37.51885  | 6.7215695  | 17.036522  | 7.266637   | 5.520516   | 4.6544566  |
| 72.14134  | 14.617041  | 34.786674  | 27.511364  | 6.9682217  | 6.521834   |
| 8.279044  | 36.79544   | 12.64665   | 22.374348  | 5.6255145  | 4.3227577  |
| 851.89984 | 202.22154  | 332.91678  | 256.85855  | 9.596456   | 8.756732   |
| 86.68817  | 35.258255  | 37.51167   | 50.00646   | 7.6208763  | 7.764816   |
| 86.68817  | 35.258255  | 37.51167   | 50.00646   | 7.6208763  | 7.764816   |
| 8.791377  | 4.9999995  | 23.298748  | 14.430729  | 5.3618145  | 5.3962736  |
| 212.47934 | 119.2367   | 177.40019  | 117.593155 | 8.856418   | 8.876472   |
| 46.941406 | 35.420345  | 39.645477  | 32.593784  | 6.691194   | 7.057556   |
| 55.270905 | 80.759514  | 55.681976  | 57.122627  | 7.9342217  | 8.613312   |
| 55.270905 | 80.759514  | 55.681976  | 57.122627  | 7.9342217  | 8.613312   |
| 55.270905 | 80.759514  | 55.681976  | 57.122627  | 7.9342217  | 8.613312   |
| 55.270905 | 80.759514  | 55.681976  | 57.122627  | 7.9342217  | 8.613312   |
| 55.270905 | 80.759514  | 55.681976  | 57.122627  | 7.9342217  | 8.613312   |
| 55.270905 | 80.759514  | 55.681976  | 57.122627  | 7.9342217  | 8.613312   |
| 55.270905 | 80.759514  | 55.681976  | 57.122627  | 7.9342217  | 8.613312   |
| 735.9117  | 616.70325  | 1116.5596  | 670.45294  | 10.53047   | 10.729852  |
| 735.9117  | 616.70325  | 1116.5596  | 670.45294  | 10.53047   | 10.729852  |
| 26.364466 | 8.095316   | 12.014589  | 10.422209  | 5.3189397  | 5.5381618  |
| 15.641069 | 35.31418   | 29.925968  | 19.14035   | 6.3592005  | 6.8468814  |
| 26.758799 | 42.833782  | 26.182262  | 25.543129  | 7.036479   | 7.2189813  |
| 11.72257  | 7.368085   | 10.295169  | 12.7849    | 4.5944915  | 5.0130816  |
| 11.90632  | 8.146295   | 4.9999995  | 9.336588   | 4.3953185  | 4.535953   |
| 130.5667  | 78.02035   | 89.55344   | 76.28767   | 7.306882   | 8.972078   |
| 16.758894 | 14.600421  | 21.943161  | 11.2349615 | 5.471082   | 5.9140425  |
| 7.6397343 | 28.453693  | 30.911163  | 24.094334  | 10.244089  | 7.2733502  |
| 9.378756  | 12.469851  | 5.4306126  | 10.45047   | 4.2485285  | 3.5126534  |
| 565.263   | 401.43088  | 731.8774   | 444.56934  | 11.4742365 | 12.122962  |
| 45.06956  | 55.3383    | 118.064384 | 73.91688   | 7.9539247  | 8.087202   |
| 12.972341 | 11.268029  | 5.219436   | 9.760259   | 4.878085   | 3.8519087  |
| 26.724142 | 36.02392   | 13.0935    | 21.594498  | 8.373123   | 9.21453    |
| 18.39479  | 15.065028  | 44.130295  | 27.926348  | 6.011666   | 6.7500806  |
| 18.39479  | 15.065028  | 44.130295  | 27.926348  | 6.011666   | 6.7500806  |
| 14.10939  | 7.7896695  | 9.376892   | 11.900041  | 4.4894514  | 4.9411626  |
| 31.586996 | 32.61732   | 33.102028  | 22.137194  | 6.3684483  | 6.656224   |
| 22.789928 | 14.815331  | 7.954725   | 7.350442   | 5.178852   | 5.1954083  |
| 9.506561  | 6.451747   | 9.326593   | 5.874494   | 4.869189   | 4.9926424  |
| 9.506561  | 6.451747   | 9.326593   | 5.874494   | 4.869189   | 4.9926424  |
| 32.23415  | 6.561763   | 12.95513   | 13.474449  | 5.830849   | 5.2916236  |
| 483.38516 | 228.78009  | 504.32852  | 291.25906  | 9.982735   | 10.0338955 |
| 483.38516 | 228.78009  | 504.32852  | 291.25906  | 9.982735   | 10.0338955 |
| 483.38516 | 228.78009  | 504.32852  | 291.25906  | 9.982735   | 10.0338955 |
| 483.38516 | 228.78009  | 504.32852  | 291.25906  | 9.982735   | 10.0338955 |
| 5.4040866 | 24.268799  | 4.9999995  | 12.278718  | 5.472554   | 4.032456   |
| 58.642868 | 122.534615 | 55.119324  | 77.44234   | 7.354245   | 7.1611257  |
| 159.13542 | 83.93907   | 108.931274 | 80.74902   | 8.967152   | 9.111512   |
| 4.9999995 | 4.9999995  | 8.463089   | 4.9999995  | 6.5717063  | 5.1868286  |

|           |           |           |           |           |           |
|-----------|-----------|-----------|-----------|-----------|-----------|
| 3.756371  | 4.5664573 | 4.9209423 | 5.0643563 | 2.7717695 | 2.4279919 |
| 3.5475922 | 3.8226523 | 3.7907338 | 3.5955896 | 2.3467326 | 3.2481415 |
| 10.30017  | 10.513674 | 9.88764   | 10.051797 | 9.267637  | 9.013053  |
| 5.4549794 | 5.4589586 | 6.024882  | 5.8248787 | 4.7685995 | 4.1600113 |
| 5.4549794 | 5.4589586 | 6.024882  | 5.8248787 | 4.7685995 | 4.1600113 |
| 5.4549794 | 5.4589586 | 6.024882  | 5.8248787 | 4.7685995 | 4.1600113 |
| 5.4549794 | 5.4589586 | 6.024882  | 5.8248787 | 4.7685995 | 4.1600113 |
| 5.4549794 | 5.4589586 | 6.024882  | 5.8248787 | 4.7685995 | 4.1600113 |
| 7.5354524 | 7.9422145 | 6.669238  | 7.2237377 | 6.3626533 | 6.4054785 |
| 4.2165093 | 4.9297    | 4.169465  | 4.6868076 | 3.7166622 | 2.4279919 |
| 4.2165093 | 4.9297    | 4.169465  | 4.6868076 | 3.7166622 | 2.4279919 |
| 4.2165093 | 4.9297    | 4.169465  | 4.6868076 | 3.7166622 | 2.4279919 |
| 9.019658  | 9.191443  | 8.78512   | 8.921026  | 7.5460916 | 8.121407  |
| 9.019658  | 9.191443  | 8.78512   | 8.921026  | 7.5460916 | 8.121407  |
| 9.093034  | 6.8550367 | 7.876892  | 7.5239215 | 6.461682  | 6.3575416 |
| 5.5986714 | 6.2975616 | 6.5729055 | 6.640818  | 4.9361496 | 5.904049  |
| 6.0606613 | 5.3980017 | 3.8577545 | 4.3700776 | 4.408697  | 3.4658408 |
| 7.232593  | 6.510322  | 5.2818365 | 5.87541   | 5.8075056 | 5.5724835 |
| 6.576168  | 7.731335  | 4.9836664 | 6.863506  | 4.000017  | 4.4020104 |
| 9.933219  | 10.031924 | 9.276599  | 9.617431  | 8.717515  | 7.5399895 |
| 7.1697836 | 7.331037  | 6.352173  | 7.0769625 | 6.501225  | 6.5415435 |
| 7.1697836 | 7.331037  | 6.352173  | 7.0769625 | 6.501225  | 6.5415435 |
| 5.2364244 | 4.7426925 | 5.9062    | 5.687501  | 2.3467326 | 2.4279919 |
| 8.863566  | 9.124042  | 8.941606  | 9.058694  | 7.496756  | 7.6624255 |
| 6.7632737 | 6.104297  | 6.8325105 | 6.497655  | 5.7973332 | 6.118871  |
| 6.7161136 | 7.2840753 | 8.218967  | 7.8594213 | 6.303389  | 7.317497  |
| 6.7161136 | 7.2840753 | 8.218967  | 7.8594213 | 6.303389  | 7.317497  |
| 6.7161136 | 7.2840753 | 8.218967  | 7.8594213 | 6.303389  | 7.317497  |
| 6.7161136 | 7.2840753 | 8.218967  | 7.8594213 | 6.303389  | 7.317497  |
| 6.7161136 | 7.2840753 | 8.218967  | 7.8594213 | 6.303389  | 7.317497  |
| 6.7161136 | 7.2840753 | 8.218967  | 7.8594213 | 6.303389  | 7.317497  |
| 10.31841  | 11.708961 | 10.655523 | 11.229724 | 9.383503  | 9.154838  |
| 10.31841  | 11.708961 | 10.655523 | 11.229724 | 9.383503  | 9.154838  |
| 4.732257  | 4.8015223 | 4.9886355 | 4.787864  | 3.6624749 | 3.8515859 |
| 5.7011576 | 5.9060836 | 6.2758226 | 6.170115  | 4.953069  | 6.0431924 |
| 7.131299  | 6.8253646 | 7.016437  | 7.1162405 | 5.3816147 | 5.9182405 |
| 4.831638  | 4.712561  | 4.870487  | 4.68232   | 3.124553  | 2.4279919 |
| 4.4054723 | 4.78062   | 4.344045  | 4.7145166 | 3.161067  | 4.0606484 |
| 7.6211963 | 7.1873198 | 7.9418917 | 7.6265297 | 6.668021  | 6.361072  |
| 5.2894835 | 5.4600086 | 5.116288  | 4.8252106 | 3.8508828 | 4.0965295 |
| 11.161579 | 5.1810617 | 10.13089  | 9.454793  | 4.383066  | 5.474477  |
| 4.8133607 | 7.445708  | 5.289249  | 6.4694476 | 3.0713778 | 2.4279919 |
| 10.273834 | 10.48608  | 11.766797 | 11.420417 | 9.314806  | 9.747459  |
| 7.883682  | 6.6030097 | 7.4227605 | 7.1796627 | 5.42145   | 6.0528355 |
| 5.4688582 | 4.134693  | 6.1779957 | 5.866915  | 2.63139   | 2.4279919 |
| 5.836652  | 4.6824737 | 7.3133464 | 6.732897  | 6.350574  | 7.5572824 |
| 5.8269167 | 6.314351  | 5.311865  | 5.9601197 | 4.5239863 | 4.1154904 |
| 5.8269167 | 6.314351  | 5.311865  | 5.9601197 | 4.5239863 | 4.1154904 |
| 3.762033  | 5.3890414 | 4.174975  | 4.7056756 | 3.0139115 | 3.7706938 |
| 5.731268  | 6.316223  | 6.646162  | 6.67738   | 4.9103575 | 5.678822  |
| 5.1209946 | 5.3206434 | 4.31089   | 5.2535625 | 4.6503224 | 4.526578  |
| 4.9343333 | 4.3432484 | 4.7512555 | 4.8322387 | 2.9290867 | 3.622164  |
| 4.9343333 | 4.3432484 | 4.7512555 | 4.8322387 | 2.9290867 | 3.622164  |
| 5.5946236 | 5.0176053 | 4.330019  | 3.8686814 | 4.428994  | 3.280585  |
| 9.927347  | 9.87209   | 9.416045  | 9.5666065 | 8.72701   | 8.386008  |
| 9.927347  | 9.87209   | 9.416045  | 9.5666065 | 8.72701   | 8.386008  |
| 9.927347  | 9.87209   | 9.416045  | 9.5666065 | 8.72701   | 8.386008  |
| 9.927347  | 9.87209   | 9.416045  | 9.5666065 | 8.72701   | 8.386008  |
| 6.246205  | 9.54743   | 4.7249584 | 8.318831  | 2.3467326 | 2.4279919 |
| 7.361637  | 9.006942  | 7.626415  | 8.31159   | 6.035231  | 6.899699  |
| 8.52641   | 7.803236  | 8.728725  | 8.237523  | 6.767985  | 6.4538713 |
| 7.138297  | 4.8281054 | 5.366543  | 5.293379  | 2.6458135 | 2.4279919 |

|           |           |           |           |
|-----------|-----------|-----------|-----------|
| 3.6012063 | 2.6997633 | 3.2333555 | 2.352752  |
| 3.2878168 | 2.3408759 | 2.3618152 | 2.671153  |
| 9.542218  | 8.201783  | 8.407669  | 9.205354  |
| 5.0014496 | 4.00406   | 4.598633  | 3.8780541 |
| 5.0014496 | 4.00406   | 4.598633  | 3.8780541 |
| 5.0014496 | 4.00406   | 4.598633  | 3.8780541 |
| 5.0014496 | 4.00406   | 4.598633  | 3.8780541 |
| 5.0014496 | 4.00406   | 4.598633  | 3.8780541 |
| 7.0668764 | 5.985796  | 4.8330617 | 7.1965575 |
| 3.654477  | 2.792818  | 3.8112333 | 2.8594089 |
| 3.654477  | 2.792818  | 3.8112333 | 2.8594089 |
| 3.654477  | 2.792818  | 3.8112333 | 2.8594089 |
| 7.114     | 7.4012246 | 7.866164  | 7.609486  |
| 7.114     | 7.4012246 | 7.866164  | 7.609486  |
| 6.93584   | 5.8271317 | 5.6087933 | 5.849493  |
| 4.6782026 | 4.8758636 | 4.3766584 | 4.6830854 |
| 5.2322984 | 2.8495529 | 4.3662977 | 3.1256516 |
| 6.145634  | 4.004725  | 5.3939104 | 5.1547284 |
| 3.1797569 | 5.4333124 | 3.9357905 | 4.8278956 |
| 9.677465  | 8.060068  | 8.613576  | 8.545436  |
| 6.4086394 | 5.3698177 | 5.4982743 | 6.0709443 |
| 6.4086394 | 5.3698177 | 5.4982743 | 6.0709443 |
| 3.2567592 | 2.3408759 | 4.8164535 | 4.164312  |
| 7.677998  | 7.254087  | 7.7133527 | 7.348425  |
| 5.552009  | 5.3766575 | 5.580455  | 5.4200087 |
| 5.7815433 | 6.6631455 | 6.064305  | 6.276834  |
| 5.7815433 | 6.6631455 | 6.064305  | 6.276834  |
| 5.7815433 | 6.6631455 | 6.064305  | 6.276834  |
| 5.7815433 | 6.6631455 | 6.064305  | 6.276834  |
| 5.7815433 | 6.6631455 | 6.064305  | 6.276834  |
| 5.7815433 | 6.6631455 | 6.064305  | 6.276834  |
| 9.467373  | 9.735577  | 10.373614 | 9.947801  |
| 9.467373  | 9.735577  | 10.373614 | 9.947801  |
| 4.7432575 | 3.106084  | 3.8631744 | 3.6733012 |
| 4.031947  | 5.3725133 | 5.1794367 | 4.588553  |
| 4.7644362 | 5.6615515 | 4.9800606 | 5.0322485 |
| 3.6432493 | 2.9727907 | 3.6427283 | 3.979651  |
| 3.6623552 | 3.1157691 | 2.3618152 | 3.506844  |
| 6.9852676 | 6.6092434 | 6.73819   | 6.705492  |
| 4.125649  | 4.002897  | 4.7289863 | 3.78435   |
| 3.0751512 | 5.0359163 | 5.223381  | 4.9418535 |
| 3.3456976 | 3.756605  | 2.779275  | 3.6763659 |
| 9.088825  | 9.098459  | 9.746593  | 9.339301  |
| 5.491871  | 6.0714536 | 7.132695  | 6.6573205 |
| 3.7749643 | 3.6037025 | 2.729733  | 3.5740688 |
| 4.762749  | 5.402174  | 3.9852204 | 4.7754884 |
| 4.255297  | 4.0515842 | 5.732545  | 5.1774917 |
| 4.255297  | 4.0515842 | 5.732545  | 5.1774917 |
| 3.8896964 | 3.0499225 | 3.5148478 | 3.8746445 |
| 4.9963174 | 5.240079  | 5.3195934 | 4.811007  |
| 4.5414867 | 4.025834  | 3.2858248 | 3.144012  |
| 3.3615243 | 2.792315  | 3.5072186 | 2.813815  |
| 3.3615243 | 2.792315  | 3.5072186 | 2.813815  |
| 5.0232916 | 2.8144748 | 3.9718282 | 4.0647054 |
| 8.873232  | 8.247959  | 9.211855  | 8.722403  |
| 8.873232  | 8.247959  | 9.211855  | 8.722403  |
| 8.873232  | 8.247959  | 9.211855  | 8.722403  |
| 8.873232  | 8.247959  | 9.211855  | 8.722403  |
| 2.6664345 | 4.7837806 | 2.3618152 | 3.9204235 |
| 5.860233  | 7.2986503 | 6.0498543 | 6.729886  |
| 7.2669153 | 6.7183876 | 7.023465  | 6.78902   |
| 2.350709  | 2.3408759 | 3.3722532 | 2.352752  |

|                      |                    |                    |                   |           |                  |
|----------------------|--------------------|--------------------|-------------------|-----------|------------------|
| ASHGA5P056040        | 0.000593543        | 0.016411961        | 3.3850043         | up        | noncoding        |
| ASHGA5P044370        | 0.006202958        | 0.050241924        | 3.8241574         | up        | noncoding        |
| ASHGA5P044370        | 0.006202958        | 0.050241924        | 3.8241574         | up        | noncoding        |
| <b>ASHGA5P022599</b> | <b>0.000411884</b> | <b>0.014498655</b> | <b>15.7475623</b> | <b>up</b> | <b>noncoding</b> |
| ASHGA5P030420        | 1.45369E-05        | 0.004434727        | 2.1715569         | up        | noncoding        |
| ASHGA5P037800        | 0.001315764        | 0.024205782        | 3.4845925         | up        | noncoding        |
| ASHGA5P040385        | 0.011093531        | 0.065002686        | 3.0581461         | up        | noncoding        |
| ASHGA5P040385        | 0.011093531        | 0.065002686        | 3.0581461         | up        | noncoding        |
| ASHGA5P040385        | 0.011093531        | 0.065002686        | 3.0581461         | up        | noncoding        |
| ASHGA5P032705        | 0.048615314        | 0.143206684        | 9.1650282         | up        | noncoding        |
| ASHGA5P043889        | 0.009262779        | 0.059833628        | 2.0353458         | up        | noncoding        |
| ASHGA5P047975        | 0.004334763        | 0.041729925        | 2.7486954         | up        | noncoding        |
| ASHGA5P000521        | 0.017741106        | 0.080853294        | 2.1509967         | up        | noncoding        |
| ASHGA5P054916        | 7.34484E-05        | 0.008283845        | 2.7423079         | up        | noncoding        |
| ASHGA5P029332        | 0.027056606        | 0.102679848        | 2.2137161         | up        | noncoding        |
| ASHGA5P056970        | 0.002374431        | 0.031849965        | 3.4884686         | up        | noncoding        |
| ASHGA5P049233        | 0.007664987        | 0.054952989        | 4.0235158         | up        | noncoding        |
| ASHGA5P033347        | 0.006747962        | 0.052096554        | 2.5192794         | up        | noncoding        |
| ASHGA5P033347        | 0.006747962        | 0.052096554        | 2.5192794         | up        | noncoding        |
| ASHGA5P033347        | 0.006747962        | 0.052096554        | 2.5192794         | up        | noncoding        |
| ASHGA5P022745        | 0.014994338        | 0.074989017        | 2.3312742         | up        | noncoding        |
| ASHGA5P022745        | 0.014994338        | 0.074989017        | 2.3312742         | up        | noncoding        |
| ASHGA5P043681        | 0.000116929        | 0.009923756        | 2.040575          | up        | noncoding        |
| ASHGA5P035417        | 0.004292029        | 0.041572876        | 5.7821429         | up        | noncoding        |
| ASHGA5P028373        | 0.015276203        | 0.075655452        | 2.0767107         | up        | noncoding        |
| ASHGA5P057025        | 0.004930716        | 0.04447418         | 2.7443821         | up        | noncoding        |
| ASHGA5P036743        | 0.020220443        | 0.087085259        | 3.2252967         | up        | noncoding        |
| ASHGA5P044347        | 0.005719939        | 0.048087879        | 5.4860566         | up        | noncoding        |
| ASHGA5P031524        | 0.0009559          | 0.021023728        | 2.1617731         | up        | noncoding        |
| ASHGA5P031524        | 0.0009559          | 0.021023728        | 2.1617731         | up        | noncoding        |
| ASHGA5P031777        | 0.003411008        | 0.037690616        | 2.0189083         | up        | noncoding        |
| ASHGA5P054921        | 0.000347607        | 0.013409132        | 2.5253194         | up        | noncoding        |
| ASHGA5P054921        | 0.000347607        | 0.013409132        | 2.5253194         | up        | noncoding        |
| ASHGA5P054921        | 0.000347607        | 0.013409132        | 2.5253194         | up        | noncoding        |
| ASHGA5P035595        | 0.029745787        | 0.108120501        | 2.0921658         | up        | noncoding        |
| ASHGA5P052792        | 9.34312E-05        | 0.009080764        | 3.6311692         | up        | noncoding        |
| ASHGA5P037958        | 7.669E-05          | 0.008348603        | 5.0953451         | up        | noncoding        |
| ASHGA5P020759        | 0.004080202        | 0.040799661        | 2.3681042         | up        | noncoding        |
| ASHGA5P020759        | 0.004080202        | 0.040799661        | 2.3681042         | up        | noncoding        |
| ASHGA5P020759        | 0.004080202        | 0.040799661        | 2.3681042         | up        | noncoding        |
| ASHGA5P029767        | 0.034952198        | 0.118300274        | 2.2888647         | up        | noncoding        |
| ASHGA5P049520        | 0.000569043        | 0.016120398        | 3.6350821         | up        | noncoding        |
| ASHGA5P020681        | 0.026121898        | 0.100677786        | 4.1816753         | up        | noncoding        |
| ASHGA5P013324        | 0.001716208        | 0.027747135        | 2.0458104         | up        | noncoding        |
| ASHGA5P013324        | 0.001716208        | 0.027747135        | 2.0458104         | up        | noncoding        |
| ASHGA5P013324        | 0.001716208        | 0.027747135        | 2.0458104         | up        | noncoding        |
| ASHGA5P013324        | 0.001716208        | 0.027747135        | 2.0458104         | up        | noncoding        |
| ASHGA5P013324        | 0.001716208        | 0.027747135        | 2.0458104         | up        | noncoding        |
| ASHGA5P013324        | 0.001716208        | 0.027747135        | 2.0458104         | up        | noncoding        |
| ASHGA5P041731        | 0.002980125        | 0.03525836         | 5.115651          | up        | noncoding        |
| ASHGA5P044053        | 0.003886196        | 0.039968017        | 2.6621515         | up        | noncoding        |
| ASHGA5P054938        | 0.005147417        | 0.045573729        | 3.103416          | up        | noncoding        |
| ASHGA5P040769        | 0.009322987        | 0.059922247        | 2.0076979         | up        | noncoding        |
| ASHGA5P025909        | 0.003987611        | 0.040458123        | 2.0977174         | up        | noncoding        |
| ASHGA5P028273        | 0.013197221        | 0.070372979        | 2.650688          | up        | noncoding        |
| ASHGA5P028273        | 0.013197221        | 0.070372979        | 2.650688          | up        | noncoding        |
| ASHGA5P028273        | 0.013197221        | 0.070372979        | 2.650688          | up        | noncoding        |
| ASHGA5P033138        | 0.043375686        | 0.133429762        | 2.0137079         | up        | noncoding        |
| ASHGA5P030955        | 0.008002374        | 0.056265282        | 2.7795156         | up        | noncoding        |
| ASHGA5P030955        | 0.008002374        | 0.056265282        | 2.7795156         | up        | noncoding        |
| ASHGA5P018873        | 1.08983E-05        | 0.004010044        | 2.8051811         | up        | noncoding        |
| ASHGA5P014887        | 0.01045986         | 0.063149534        | 4.5721492         | up        | noncoding        |
| ASHGA5P014887        | 0.01045986         | 0.063149534        | 4.5721492         | up        | noncoding        |

|                    |                    |                     |       |                    |   |
|--------------------|--------------------|---------------------|-------|--------------------|---|
| ENST00000555377    | RP11-72M17.1       | GENCODE             | 286   | chr14              | - |
| ENST00000566000    | RP11-219B4.7       | GENCODE             | 1264  | chr8               | - |
| ENST00000566000    | RP11-219B4.7       | GENCODE             | 1264  | chr8               | - |
| ENST00000559432    | CRNDE              | GENCODE             | 587   | chr16              | - |
| TCONS_00017282     | XLOC_008100        | LincRNAs identified | 1287  | chrX               | - |
| ENST00000565162    | AC004463.6         | GENCODE             | 1438  | chr22              | + |
| ENST00000507251    | CTD-2203K17.1      | GENCODE             | 537   | chr5               | - |
| ENST00000507251    | CTD-2203K17.1      | GENCODE             | 537   | chr5               | - |
| ENST00000507251    | CTD-2203K17.1      | GENCODE             | 537   | chr5               | - |
| ENST00000431729    | RP11-191N8.2       | GENCODE             | 423   | chr1               | - |
| uc010llg.1         | BC150500           | UCSC_knowngene      | 478   | chr7               | + |
| ENST00000424948    | RP1-92O14.3        | GENCODE             | 661   | chr1               | - |
| chr8:20622500-2063 | chr8:20622500-2063 | LincRNAs identified | 11950 | chr8               | - |
| ENST00000535076    | SNHG1              | GENCODE             | 849   | chr11              | - |
| ENST00000555776    | RP11-61O1.1        | GENCODE             | 542   | chr14              | - |
| TCONS_00011696     | XLOC_005175        | LincRNAs identified | 438   | chr6               | + |
| TCONS_00014161     | XLOC_006144        | LincRNAs identified | 579   | chr7               | + |
| ENST00000579037    | RP11-661C3.2       | GENCODE             | 321   | chr17              | + |
| ENST00000579037    | RP11-661C3.2       | GENCODE             | 321   | chr17              | + |
| ENST00000579037    | RP11-661C3.2       | GENCODE             | 321   | chr17              | + |
| ENST00000561968    | CRYM-AS1           | GENCODE             | 559   | chr16              | + |
| ENST00000561968    | CRYM-AS1           | GENCODE             | 559   | chr16              | + |
| uc003tqy.3         | CO9                | UCSC_knowngene      | 505   | chr7               | + |
| ENST00000442456    | AC007405.4         | GENCODE             | 2026  | chr2               | - |
| ENST00000544419    | RP5-944M2.2        | GENCODE             | 480   | chr12              | + |
| TCONS_00012063     | XLOC_005592        | LincRNAs identified | 346   | chr6               | - |
| TCONS_00026722     | XLOC_012857        | LincRNAs identified | 275   | chr18              | - |
| ENST00000522183    | RP11-697M17.1      | GENCODE             | 833   | chr8               | - |
| ENST00000564919    | RP11-77H9.5        | GENCODE             | 409   | chr16              | + |
| ENST00000564919    | RP11-77H9.5        | GENCODE             | 409   | chr16              | + |
| ENST00000566383    | RP11-44F14.2       | GENCODE             | 584   | chr16              | + |
| ENST00000539921    | SNHG1              | GENCODE             | 1071  | chr11              | - |
| ENST00000539921    | SNHG1              | GENCODE             | 1071  | chr11              | - |
| ENST00000539921    | SNHG1              | GENCODE             | 1071  | chr11              | - |
| uc001bgg.1         | AK025975           | UCSC_knowngene      | 3565  | chr1               | + |
| ENST00000427501    | SNHG5              | GENCODE             | 680   | chr6               | - |
| AW262946           |                    | LincRNAs identified | 426   | chr13              | - |
| NR_033193          | ZFAND1             | RefSeq              | 2212  | chr8               | - |
| NR_033193          | ZFAND1             | RefSeq              | 2212  | chr8               | - |
| NR_033193          | ZFAND1             | RefSeq              | 2212  | chr8               | - |
| ENST00000521812    | MEG3               | GENCODE             | 635   | chr14              | + |
| NR_045024          | C17orf76-AS1       | RefSeq              | 642   | chr17              | + |
| ENST00000518376    | RP11-1136L8.1      | GENCODE             | 872   | chr8               | - |
| NR_028135          | KCNMB3             | RefSeq              | 2141  | chr3               | - |
| NR_028135          | KCNMB3             | RefSeq              | 2141  | chr3               | - |
| NR_028135          | KCNMB3             | RefSeq              | 2141  | chr3               | - |
| NR_028135          | KCNMB3             | RefSeq              | 2141  | chr3               | - |
| NR_028135          | KCNMB3             | RefSeq              | 2141  | chr3               | - |
| ENST00000457253    | XXbac-BPG308K3.5   | GENCODE             | 709   | chr6               | - |
| uc003won.1         | BC107568           | UCSC_knowngene      | 932   | chr7_gl000195_rand | + |
| ENST00000544553    | RP11-783K16.5      | GENCODE             | 391   | chr11              | + |
| CB269930           |                    | LincRNAs identified | 418   | chr1               | - |
| uc002lau.3         | LOC284260          | UCSC_knowngene      | 1847  | chr18              | + |
| uc001trc.1         | BC064974           | UCSC_knowngene      | 1828  | chr12              | + |
| uc001trc.1         | BC064974           | UCSC_knowngene      | 1828  | chr12              | + |
| uc001trc.1         | BC064974           | UCSC_knowngene      | 1828  | chr12              | + |
| TCONS_00028208     | XLOC_013553        | LincRNAs identified | 3392  | chr20              | + |
| ENST00000572706    | RP11-485G7.5       | GENCODE             | 505   | chr16              | - |
| ENST00000572706    | RP11-485G7.5       | GENCODE             | 505   | chr16              | - |
| NR_003605          | ZNF1-AS1           | RefSeq              | 695   | chr20              | + |
| ENST00000414386    | RP11-328M4.2       | GENCODE             | 419   | chr6               | - |
| ENST00000414386    | RP11-328M4.2       | GENCODE             | 419   | chr6               | - |

|           |           |                  |                                                 |
|-----------|-----------|------------------|-------------------------------------------------|
| 66961361  | 66963052  |                  | ATAAAATAGATCTCAGGCTTATGTA' intergenic           |
| 86088033  | 86089297  |                  | TACAACAGCATTAACTAGTAAAGCT bidirectional         |
| 86088033  | 86089297  |                  | TACAACAGCATTAACTAGTAAAGCT bidirectional         |
| 54952977  | 54962628  | uc010vhb.2       | AGATTCTGAAGA' 643911 intergenic                 |
| 2484083   | 2488088   | TCONS_00017281   | TCCGTGTGGAGAGAGGGGCATAAAG' intergenic           |
| 19158907  | 19160345  |                  | CCTAAGACCCTGTGCAGGGAATCTG intergenic            |
| 33424130  | 33440725  |                  | GCCAGTGTTTGGAATCGACTGGGCT bidirectional         |
| 33424130  | 33440725  |                  | GCCAGTGTTTGGAATCGACTGGGCT bidirectional         |
| 33424130  | 33440725  |                  | GCCAGTGTTTGGAATCGACTGGGCT bidirectional         |
| 222001007 | 222014008 |                  | GGCAGATCACCAAAGAACTCAAGAT intergenic            |
| 127700597 | 127701075 |                  | TACCTGGAAAGCAGTGCATGTATCA intron sense-overlapp |
| 43820354  | 43824329  |                  | TTAAATCCTACACGAGAGTCGTATT' bidirectional        |
| 20578220  | 20590170  |                  | AAATAGTGGCCTCTCCTTCTAGAAA. intergenic           |
| 62619519  | 62621168  |                  | TCTGATTTTCTGA 23642 intergenic                  |
| 98534576  | 98671480  |                  | TTCTTCTCCCGGATTTTTCTTTCAAT' intergenic          |
| 12322519  | 12335036  |                  | ACTTGTCATGCAAACCTCTGTTCCTTC intergenic          |
| 73668831  | 73669533  |                  | TTTTCCAGATTGCTCTGAATGTCCTA' intergenic          |
| 71239231  | 71240845  |                  | AAGTACAAGATAACGATGAATTCTG intron sense-overlapp |
| 71239231  | 71240845  |                  | AAGTACAAGATAACGATGAATTCTG intron sense-overlapp |
| 71239231  | 71240845  |                  | AAGTACAAGATAACGATGAATTCTG intron sense-overlapp |
| 21312201  | 21328207  |                  | ACCCAAAAGGAGTTGAACTTCCTCT' intronic antisense   |
| 21312201  | 21328207  |                  | ACCCAAAAGGAGTTGAACTTCCTCT' intronic antisense   |
| 55840871  | 55841376  | NM_004577        | CAATTAACACCTTTACTCTTAGGA' intergenic            |
| 171579718 | 171627276 |                  | CATGTATTTTTCCCACTGATGTTCCAC intergenic          |
| 126910535 | 126918554 |                  | CCCTCTCCAAGCGTGTTAATAAAAT' intergenic           |
| 5047436   | 5054329   | TCONS_00012062   | CTGGATGAAGTACAGCTCTGAAGTC intergenic            |
| 57053838  | 57056221  |                  | AAAGCCTTGATGGTCCAGCCCTCGA intergenic            |
| 76135937  | 76236976  | uc003yao.3       | CTTCAAATAGCTATTTTAATTTTGC intergenic            |
| 8947168   | 8948204   |                  | TCTTTTCTGGATGGATCGGGACAAA' natural antisense    |
| 8947168   | 8948204   |                  | TCTTTTCTGGATGGATCGGGACAAA' natural antisense    |
| 53407404  | 53418171  |                  | AACACCTTAGGTGAATACCGAGCTC intergenic            |
| 62619459  | 62622708  | ENST00000539975, | ATTTTTTCAGATC 23642 bidirectional               |
| 62619459  | 62622708  | ENST00000539975, | ATTTTTTCAGATC 23642 bidirectional               |
| 62619459  | 62622708  | ENST00000539975, | ATTTTTTCAGATC 23642 bidirectional               |
| 23243782  | 23247347  |                  | CATTCCTCACAAACCAGCCTTTTTTG intergenic           |
| 86386799  | 86387711  | ENST00000431043  | GACTAGCAGCTTCATTTTGAAGTAG' intergenic           |
| 28393227  | 28393643  |                  | CCAGTCTAGGTTTATGCCAGACATT' intergenic           |
| 82613565  | 82633539  |                  | CACTAACTTGAC' 79752 exon sense-overlappi        |
| 82613565  | 82633539  |                  | CACTAACTTGAC' 79752 exon sense-overlappi        |
| 82613565  | 82633539  |                  | CACTAACTTGAC' 79752 exon sense-overlappi        |
| 101298400 | 101302560 | ENST00000452120  | CTTACCCTGGCG' 55384 intergenic                  |
| 16342300  | 16344525  | ENST00000460249, | CCAAGAGAAGGT 125144 intergenic                  |
| 128742439 | 128746213 |                  | CCTATGGAGAACCGAGACACAAAAC intergenic            |
| 178957536 | 178977679 |                  | AATGTA AAAAGCG' 27094 exon sense-overlappi      |
| 178957536 | 178977679 |                  | AATGTA AAAAGCG' 27094 exon sense-overlappi      |
| 178957536 | 178977679 |                  | AATGTA AAAAGCG' 27094 exon sense-overlappi      |
| 178957536 | 178977679 |                  | AATGTA AAAAGCG' 27094 exon sense-overlappi      |
| 178957536 | 178977679 |                  | AATGTA AAAAGCG' 27094 exon sense-overlappi      |
| 28805645  | 28806783  |                  | CGTCGCCAAATTGACGAGCTCATTA intergenic            |
| 137966    | 141360    |                  | AAGGAAAGAAGGTGTGTTTTGCCTG intergenic            |
| 64013435  | 64015689  |                  | CTGCATTTCTCAGAAGGCTGTAAC. intronic antisense    |
| 153487636 | 153488055 |                  | AATTCTGATCATTCTCTGCAGCATG' intergenic           |
| 39766634  | 40271389  |                  | TTTATAGGAGATGGACCTTCTCCTA' intergenic           |
| 110939418 | 110941246 |                  | AATTTCTCTCTCATGACTTGTGTGA exon sense-overlappi  |
| 110939418 | 110941246 |                  | AATTTCTCTCTCATGACTTGTGTGA natural antisense     |
| 110939418 | 110941246 |                  | AATTTCTCTCTCATGACTTGTGTGA natural antisense     |
| 47129834  | 47133716  |                  | TTCTAGAAATACACATTATCCCCAG' intergenic           |
| 11438207  | 11439054  | ENST00000572913  | GCGTGGATGCAGATCACCTACAGAG intronic antisense    |
| 11438207  | 11439054  | ENST00000572913  | GCGTGGATGCAGATCACCTACAGAG intronic antisense    |
| 47894714  | 47905795  |                  | GAGCGGTTTGGT' 441951 natural antisense          |
| 41491632  | 41513914  |                  | ACGTGGGGAGAAGACGTGAGGCGG' bidirectional         |
| 41491632  | 41513914  |                  | ACGTGGGGAGAAGACGTGAGGCGG' bidirectional         |



|                 |          |                         |           |           |
|-----------------|----------|-------------------------|-----------|-----------|
| NM_001083588    | E2F5     | transcription factor E+ | 86089618  | 86126753  |
| NM_001951       | E2F5     | transcription factor E+ | 86089618  | 86126753  |
| NM_001258437    | TARS     | threonine--tRNA liga+   | 33440801  | 33468196  |
| NM_001258438    | TARS     | threonine--tRNA liga+   | 33440881  | 33468196  |
| NM_152295       | TARS     | threonine--tRNA liga+   | 33440881  | 33468196  |
| NM_014390       | SND1     | staphylococcal nucle+   | 127292201 | 127732659 |
| NM_001255       | CDC20    | cell division cycle pr+ | 43824625  | 43828873  |
| NM_001100621    | C17orf80 | uncharacterized prot+   | 71228775  | 71245095  |
| NM_001100622    | C17orf80 | uncharacterized prot+   | 71228775  | 71241483  |
| NM_017941       | C17orf80 | uncharacterized prot+   | 71228775  | 71245095  |
| NM_001014444    | CRYM     | thiomorpholine-carbc-   | 21269838  | 21314404  |
| NM_001888       | CRYM     | thiomorpholine-carbc-   | 21269838  | 21314404  |
| NM_001042476    | CARHSP1  | calcium-regulated he -  | 8946801   | 8962248   |
| NM_014316       | CARHSP1  | calcium-regulated he -  | 8946801   | 8962863   |
| NM_001012662    | SLC3A2   | 4F2 cell-surface anti±+ | 62623483  | 62656355  |
| NM_001012664    | SLC3A2   | 4F2 cell-surface anti±+ | 62623483  | 62656355  |
| NM_002394       | SLC3A2   | 4F2 cell-surface anti±+ | 62623483  | 62656355  |
| NM_001170796    | ZFAND1   | AN1-type zinc finger -  | 82613565  | 82633539  |
| NM_001170797    | ZFAND1   | AN1-type zinc finger -  | 82615148  | 82633539  |
| NM_024699       | ZFAND1   | AN1-type zinc finger -  | 82613565  | 82633539  |
| NM_001163677    | KCNMB3   | calcium-activated po-   | 178957536 | 178984838 |
| NM_014407       | KCNMB3   | calcium-activated po-   | 178960553 | 178969403 |
| NM_171828       | KCNMB3   | calcium-activated po-   | 178960593 | 178984838 |
| NM_171829       | KCNMB3   | calcium-activated po-   | 178960553 | 178977679 |
| NM_171830       | KCNMB3   | calcium-activated po-   | 178960553 | 178969645 |
| NM_138689       | PPP1R14B | protein phosphatase 1-  | 64011950  | 64014413  |
| NM_152442       | RAD9B    | cell cycle checkpoint + | 110940004 | 110969891 |
| NM_016226       | VPS29    | vacuolar protein sorti- | 110929329 | 110939916 |
| NM_057180       | VPS29    | vacuolar protein sorti- | 110929329 | 110939916 |
| ENST00000381820 | RMI2     | RMI2, RecQ mediate+     | 11410635  | 11445585  |
| ENST00000572173 | RMI2     | RMI2, RecQ mediate+     | 11343505  | 11445612  |
| NM_021035       | ZNFX1    | NFX1-type zinc fingi-   | 47862438  | 47894756  |
| NM_001012426    | FOXP4    | forkhead box protein +  | 41514163  | 41570122  |
| NM_001012427    | FOXP4    | forkhead box protein +  | 41514163  | 41570122  |

|             |             |           |           |           |           |
|-------------|-------------|-----------|-----------|-----------|-----------|
| 1618.9195   | 262.339625  | 10.111807 | 8.35265   | 2104.2886 | 2901.4353 |
| 31.723381   | 5           | 4.298621  | 2.363479  | 17.13327  | 17.813341 |
| 31.723381   | 5           | 4.298621  | 2.363479  | 17.13327  | 17.813341 |
| 2729.035967 | 100.030867  | 10.737284 | 6.760227  | 2034.6936 | 603.3609  |
| 3469.42945  | 924.28275   | 11.333155 | 10.214425 | 3662.8499 | 3815.0286 |
| 519.465797  | 87.841063   | 8.530637  | 6.729647  | 366.44388 | 338.92502 |
| 71.737949   | 20.739598   | 5.704649  | 4.091992  | 88.529465 | 36.3292   |
| 71.737949   | 20.739598   | 5.704649  | 4.091992  | 88.529465 | 36.3292   |
| 71.737949   | 20.739598   | 5.704649  | 4.091992  | 88.529465 | 36.3292   |
| 298.650764  | 12.113269   | 6.905054  | 3.708914  | 236.48227 | 8.894643  |
| 33.210147   | 12.002232   | 4.700394  | 3.67512   | 44.24674  | 37.71664  |
| 48.786393   | 11.734265   | 5.191888  | 3.733141  | 53.9724   | 22.294762 |
| 149.840512  | 47.487162   | 6.810961  | 5.705955  | 185.81056 | 186.83902 |
| 253.242768  | 58.296739   | 7.568486  | 6.113095  | 227.38388 | 199.8161  |
| 27.026553   | 10.566668   | 4.420744  | 3.274274  | 38.29485  | 22.736473 |
| 52.0114     | 8.764409    | 5.131016  | 3.328423  | 40.844135 | 31.747396 |
| 231.518498  | 39.582923   | 7.310523  | 5.302067  | 143.85498 | 345.15118 |
| 74.983198   | 27.979359   | 5.777331  | 4.44432   | 105.6531  | 66.63724  |
| 74.983198   | 27.979359   | 5.777331  | 4.44432   | 105.6531  | 66.63724  |
| 74.983198   | 27.979359   | 5.777331  | 4.44432   | 105.6531  | 66.63724  |
| 54.559849   | 15.65677    | 5.392696  | 4.171577  | 64.290054 | 71.06122  |
| 54.559849   | 15.65677    | 5.392696  | 4.171577  | 64.290054 | 71.06122  |
| 24781.38067 | 7183.216167 | 14.040146 | 13.01117  | 16274.697 | 11547.056 |
| 129.486578  | 12.586477   | 6.457797  | 3.926193  | 127.45136 | 62.325577 |
| 56.048644   | 19.195185   | 5.413783  | 4.359483  | 70.111786 | 76.148285 |
| 22.422238   | 6.185258    | 4.066898  | 2.610416  | 27.758102 | 40.186024 |
| 389.105417  | 86.89057    | 8.072127  | 6.382695  | 450.80524 | 547.16455 |
| 1031.589208 | 199.714247  | 9.367676  | 6.911906  | 1102.169  | 196.41245 |
| 49.80663    | 15.830693   | 5.302868  | 4.190653  | 59.76152  | 42.471844 |
| 49.80663    | 15.830693   | 5.302868  | 4.190653  | 59.76152  | 42.471844 |
| 32.266829   | 10.175817   | 4.625304  | 3.611728  | 34.52872  | 47.335224 |
| 174.690402  | 43.89686    | 7.056174  | 5.719708  | 173.22546 | 165.0632  |
| 174.690402  | 43.89686    | 7.056174  | 5.719708  | 173.22546 | 165.0632  |
| 174.690402  | 43.89686    | 7.056174  | 5.719708  | 173.22546 | 165.0632  |
| 64.50954    | 17.874329   | 5.368178  | 4.30318   | 88.943794 | 32.93287  |
| 1924.87315  | 308.903853  | 10.488011 | 8.627577  | 2024.627  | 1791.2313 |
| 37.82921    | 5.445983    | 4.861681  | 2.512501  | 52.569588 | 23.710636 |
| 2368.702433 | 549.148935  | 10.709108 | 9.465375  | 1897.5563 | 1458.5419 |
| 2368.702433 | 549.148935  | 10.709108 | 9.465375  | 1897.5563 | 1458.5419 |
| 2368.702433 | 549.148935  | 10.709108 | 9.465375  | 1897.5563 | 1458.5419 |
| 225.66806   | 54.317453   | 7.207258  | 6.012626  | 318.34482 | 454.6232  |
| 1407.781932 | 209.924955  | 9.896628  | 8.03464   | 1585.9286 | 2458.969  |
| 188.177339  | 28.177514   | 7.002098  | 4.938017  | 269.45743 | 211.65163 |
| 163.00749   | 48.934394   | 6.972859  | 5.940186  | 151.37888 | 152.00891 |
| 163.00749   | 48.934394   | 6.972859  | 5.940186  | 151.37888 | 152.00891 |
| 163.00749   | 48.934394   | 6.972859  | 5.940186  | 151.37888 | 152.00891 |
| 163.00749   | 48.934394   | 6.972859  | 5.940186  | 151.37888 | 152.00891 |
| 163.00749   | 48.934394   | 6.972859  | 5.940186  | 151.37888 | 152.00891 |
| 52.417835   | 5.825891    | 5.045911  | 2.690993  | 51.90862  | 73.06636  |
| 2104.71625  | 520.364073  | 10.610727 | 9.198134  | 2217.2979 | 1980.9501 |
| 1825.297127 | 337.610982  | 10.190347 | 8.556489  | 2436.1965 | 2750.3032 |
| 47.118603   | 16.149734   | 5.180857  | 4.175315  | 52.92627  | 59.073006 |
| 39.004981   | 13.009643   | 4.962138  | 3.893318  | 41.860023 | 42.156918 |
| 151.156558  | 34.163843   | 6.732473  | 5.326106  | 158.50299 | 108.41011 |
| 151.156558  | 34.163843   | 6.732473  | 5.326106  | 158.50299 | 108.41011 |
| 151.156558  | 34.163843   | 6.732473  | 5.326106  | 158.50299 | 108.41011 |
| 990.463313  | 247.328368  | 9.233797  | 8.223943  | 1387.1831 | 2116.4756 |
| 52.71805    | 12.218524   | 5.296848  | 3.822015  | 57.555443 | 80.45047  |
| 52.71805    | 12.218524   | 5.296848  | 3.822015  | 57.555443 | 80.45047  |
| 3230.228267 | 623.183223  | 11.145688 | 9.657594  | 3699.8901 | 5177.1865 |
| 679.765795  | 85.14315    | 8.80545   | 6.612578  | 1053.9535 | 1244.8535 |
| 679.765795  | 85.14315    | 8.80545   | 6.612578  | 1053.9535 | 1244.8535 |

|            |            |           |           |            |            |
|------------|------------|-----------|-----------|------------|------------|
| 1097.629   | 1525.4426  | 711.915   | 1372.8065 | 244.5615   | 266.36566  |
| 13.915919  | 85.555824  | 11.69844  | 44.22349  | 4.9999995  | 4.9999995  |
| 13.915919  | 85.555824  | 11.69844  | 44.22349  | 4.9999995  | 4.9999995  |
| 2748.3386  | 5227.087   | 1963.7413 | 3796.9944 | 86.061195  | 68.0867    |
| 3178.3132  | 3412.757   | 2833.3145 | 3914.3135 | 1075.6653  | 797.18414  |
| 389.89536  | 930.6297   | 381.63275 | 709.26807 | 78.28988   | 49.03814   |
| 136.11949  | 53.62543   | 50.25066  | 65.57345  | 23.74774   | 4.9999995  |
| 136.11949  | 53.62543   | 50.25066  | 65.57345  | 23.74774   | 4.9999995  |
| 136.11949  | 53.62543   | 50.25066  | 65.57345  | 23.74774   | 4.9999995  |
| 440.2243   | 43.835293  | 569.48004 | 492.98804 | 19.716278  | 18.245802  |
| 30.414648  | 23.11506   | 30.998959 | 32.768837 | 17.549286  | 8.654367   |
| 66.84649   | 34.08966   | 58.219593 | 57.295452 | 14.053141  | 11.094371  |
| 110.041306 | 81.334724  | 168.0709  | 166.94656 | 41.315205  | 20.228199  |
| 238.63812  | 161.19594  | 349.79965 | 342.62292 | 47.86084   | 43.289394  |
| 27.807753  | 29.828344  | 20.727026 | 22.764874 | 15.009498  | 4.9999995  |
| 50.40181   | 16.80438   | 95.24234  | 77.028336 | 5.2379613  | 10.401559  |
| 197.30775  | 83.46931   | 387.4402  | 231.88757 | 46.918453  | 16.852772  |
| 127.985275 | 49.70292   | 41.41702  | 58.50363  | 44.942913  | 9.074251   |
| 127.985275 | 49.70292   | 41.41702  | 58.50363  | 44.942913  | 9.074251   |
| 127.985275 | 49.70292   | 41.41702  | 58.50363  | 44.942913  | 9.074251   |
| 44.78246   | 61.50396   | 31.434263 | 54.287136 | 15.6625595 | 8.708936   |
| 44.78246   | 61.50396   | 31.434263 | 54.287136 | 15.6625595 | 8.708936   |
| 18678.31   | 28155.197  | 35186.016 | 38847.008 | 5165.4546  | 1714.602   |
| 156.96039  | 225.77856  | 37.49144  | 166.91214 | 12.90472   | 12.87347   |
| 46.93244   | 34.107895  | 56.601418 | 52.39004  | 27.525679  | 9.601515   |
| 15.663509  | 16.890411  | 15.239091 | 18.796291 | 12.111548  | 4.9999995  |
| 235.21834  | 135.82593  | 504.57626 | 461.04218 | 112.96613  | 44.807762  |
| 1892.1351  | 1038.682   | 787.0278  | 1173.1089 | 313.7765   | 15.836058  |
| 48.270954  | 61.657406  | 41.35399  | 45.324066 | 20.041502  | 7.6154137  |
| 48.270954  | 61.657406  | 41.35399  | 45.324066 | 20.041502  | 7.6154137  |
| 17.674799  | 37.140945  | 23.966444 | 32.95484  | 9.189742   | 10.98802   |
| 154.78699  | 114.32738  | 215.95612 | 224.78326 | 51.62463   | 43.55814   |
| 154.78699  | 114.32738  | 215.95612 | 224.78326 | 51.62463   | 43.55814   |
| 154.78699  | 114.32738  | 215.95612 | 224.78326 | 51.62463   | 43.55814   |
| 161.86378  | 30.053051  | 34.095837 | 39.167908 | 22.176622  | 5.714157   |
| 2023.7184  | 2148.008   | 1396.0842 | 2165.57   | 303.93674  | 249.84442  |
| 53.045147  | 34.86541   | 24.68291  | 38.10157  | 5.061469   | 4.9999995  |
| 1976.5459  | 3716.345   | 1764.2201 | 3399.0054 | 616.9821   | 484.6839   |
| 1976.5459  | 3716.345   | 1764.2201 | 3399.0054 | 616.9821   | 484.6839   |
| 1976.5459  | 3716.345   | 1764.2201 | 3399.0054 | 616.9821   | 484.6839   |
| 105.54912  | 80.50785   | 205.60881 | 189.37456 | 59.593803  | 36.003574  |
| 617.07104  | 720.80035  | 1568.8315 | 1495.0911 | 149.7709   | 187.80077  |
| 272.50293  | 209.6519   | 48.074223 | 117.72592 | 21.449911  | 30.25274   |
| 134.03429  | 202.43822  | 126.65777 | 211.52687 | 51.53218   | 54.55114   |
| 134.03429  | 202.43822  | 126.65777 | 211.52687 | 51.53218   | 54.55114   |
| 134.03429  | 202.43822  | 126.65777 | 211.52687 | 51.53218   | 54.55114   |
| 134.03429  | 202.43822  | 126.65777 | 211.52687 | 51.53218   | 54.55114   |
| 134.03429  | 202.43822  | 126.65777 | 211.52687 | 51.53218   | 54.55114   |
| 17.319313  | 15.4301605 | 85.892654 | 70.8899   | 6.188349   | 8.767001   |
| 2382.302   | 2459.4045  | 1435.489  | 2152.854  | 566.71466  | 195.36674  |
| 1600.8632  | 363.54736  | 2055.2896 | 1745.5829 | 472.2814   | 292.2322   |
| 49.222446  | 28.61416   | 43.85022  | 49.025517 | 20.999214  | 9.214676   |
| 39.302776  | 41.03944   | 34.98738  | 34.68335  | 15.04539   | 7.249063   |
| 141.28922  | 285.4441   | 52.91247  | 160.38046 | 25.194042  | 15.109979  |
| 141.28922  | 285.4441   | 52.91247  | 160.38046 | 25.194042  | 15.109979  |
| 141.28922  | 285.4441   | 52.91247  | 160.38046 | 25.194042  | 15.109979  |
| 452.80505  | 249.59193  | 958.2098  | 778.5144  | 318.88336  | 198.31015  |
| 23.626837  | 50.900356  | 50.403275 | 53.371918 | 9.577639   | 7.2754292  |
| 23.626837  | 50.900356  | 50.403275 | 53.371918 | 9.577639   | 7.2754292  |
| 1759.3752  | 3442.3928  | 2148.0125 | 3154.5125 | 628.3699   | 676.8368   |
| 741.25977  | 334.68777  | 322.47833 | 381.3619  | 76.07163   | 116.274124 |
| 741.25977  | 334.68777  | 322.47833 | 381.3619  | 76.07163   | 116.274124 |

|           |           |            |            |           |            |
|-----------|-----------|------------|------------|-----------|------------|
| 187.25656 | 442.89038 | 182.21568  | 250.74797  | 10.560705 | 11.078003  |
| 4.9999995 | 4.9999995 | 4.9999995  | 4.9999995  | 3.626508  | 4.15219    |
| 4.9999995 | 4.9999995 | 4.9999995  | 4.9999995  | 3.626508  | 4.15219    |
| 81.02024  | 223.02692 | 29.667559  | 112.32259  | 10.505876 | 8.922743   |
| 1306.1084 | 860.4668  | 809.4441   | 696.82776  | 11.353091 | 11.4803095 |
| 125.09459 | 72.86224  | 120.210815 | 81.55071   | 8.0526285 | 8.120192   |
| 46.406925 | 4.9999995 | 27.85439   | 16.428537  | 6.016551  | 5.091117   |
| 46.406925 | 4.9999995 | 27.85439   | 16.428537  | 6.016551  | 5.091117   |
| 46.406925 | 4.9999995 | 27.85439   | 16.428537  | 6.016551  | 5.091117   |
| 6.3264046 | 10.50435  | 4.9999995  | 12.886781  | 7.4327593 | 3.255536   |
| 23.722738 | 6.7766004 | 9.49986    | 5.8105416  | 5.0100737 | 5.1415067  |
| 20.643576 | 6.767854  | 10.2371    | 7.6095476  | 5.2870874 | 4.441683   |
| 101.06403 | 33.931587 | 53.430958  | 34.952995  | 7.0825233 | 7.3042655  |
| 48.98447  | 39.13927  | 105.44821  | 65.05825   | 7.3776712 | 7.3933673  |
| 19.906694 | 4.9999995 | 13.48382   | 4.9999995  | 4.7928348 | 4.466393   |
| 5.4916024 | 5.532404  | 14.672351  | 11.250579  | 4.8894477 | 4.915486   |
| 101.63322 | 21.32186  | 28.541845  | 22.229387  | 6.7189436 | 8.150463   |
| 83.0843   | 12.04145  | 6.744853   | 11.988389  | 6.276982  | 5.8839192  |
| 83.0843   | 12.04145  | 6.744853   | 11.988389  | 6.276982  | 5.8839192  |
| 83.0843   | 12.04145  | 6.744853   | 11.988389  | 6.276982  | 5.8839192  |
| 9.598226  | 14.81401  | 27.05291   | 18.103981  | 5.548009  | 5.972224   |
| 9.598226  | 14.81401  | 27.05291   | 18.103981  | 5.548009  | 5.972224   |
| 8591.55   | 7161.6157 | 12427.543  | 8038.5317  | 13.527157 | 13.046157  |
| 10.524141 | 12.680081 | 17.26646   | 9.269992   | 6.544166  | 5.7970476  |
| 37.911335 | 12.98444  | 16.27762   | 10.87052   | 5.672883  | 6.0635896  |
| 4.9999995 | 4.9999995 | 4.9999995  | 4.9999995  | 4.3425303 | 5.221648   |
| 238.57013 | 43.03125  | 42.56751   | 39.40064   | 8.340542  | 8.78552    |
| 648.0203  | 29.960062 | 123.86549  | 66.82707   | 9.632255  | 7.372594   |
| 23.8241   | 15.030681 | 13.410601  | 15.061862  | 5.443587  | 5.297964   |
| 23.8241   | 15.030681 | 13.410601  | 15.061862  | 5.443587  | 5.297964   |
| 12.786059 | 12.510451 | 7.677003   | 7.9036283  | 4.647783  | 5.4383473  |
| 51.07383  | 26.149918 | 59.420742  | 31.553898  | 6.9846425 | 7.1248007  |
| 51.07383  | 26.149918 | 59.420742  | 31.553898  | 6.9846425 | 7.1248007  |
| 51.07383  | 26.149918 | 59.420742  | 31.553898  | 6.9846425 | 7.1248007  |
| 24.864458 | 13.947139 | 22.09406   | 18.449535  | 6.0225396 | 4.965386   |
| 347.76086 | 264.2424  | 419.0752   | 268.5635   | 10.500728 | 10.405479  |
| 4.9999995 | 7.614431  | 4.9999995  | 4.9999995  | 5.2485094 | 4.526578   |
| 734.2601  | 555.6099  | 490.12146  | 413.23615  | 10.409206 | 10.1362505 |
| 734.2601  | 555.6099  | 490.12146  | 413.23615  | 10.409206 | 10.1362505 |
| 734.2601  | 555.6099  | 490.12146  | 413.23615  | 10.409206 | 10.1362505 |
| 97.29504  | 46.278873 | 42.348827  | 44.384598  | 7.8598895 | 8.52151    |
| 215.21484 | 170.41788 | 318.69202  | 217.65332  | 10.16291  | 10.843684  |
| 6.3661065 | 52.94368  | 24.282045  | 33.7706    | 7.614466  | 7.470888   |
| 54.971794 | 47.08346  | 45.02015   | 40.44764   | 6.7857003 | 7.0109687  |
| 54.971794 | 47.08346  | 45.02015   | 40.44764   | 6.7857003 | 7.0109687  |
| 54.971794 | 47.08346  | 45.02015   | 40.44764   | 6.7857003 | 7.0109687  |
| 54.971794 | 47.08346  | 45.02015   | 40.44764   | 6.7857003 | 7.0109687  |
| 54.971794 | 47.08346  | 45.02015   | 40.44764   | 6.7857003 | 7.0109687  |
| 4.9999995 | 4.9999995 | 4.9999995  | 4.9999995  | 5.2322044 | 6.0072627  |
| 992.81714 | 275.69547 | 680.68787  | 410.90256  | 10.637513 | 10.535038  |
| 693.2391  | 169.62485 | 238.20753  | 160.08081  | 10.765995 | 11.013427  |
| 26.917606 | 13.80181  | 17.50175   | 8.463349   | 5.2574396 | 5.7232103  |
| 22.275015 | 11.21692  | 8.713397   | 13.558071  | 4.92615   | 5.288127   |
| 35.80072  | 43.399963 | 49.208797  | 36.26956   | 6.850599  | 6.5413547  |
| 35.80072  | 43.399963 | 49.208797  | 36.26956   | 6.850599  | 6.5413547  |
| 35.80072  | 43.399963 | 49.208797  | 36.26956   | 6.850599  | 6.5413547  |
| 424.36426 | 149.82433 | 213.99434  | 178.59377  | 9.967988  | 10.629704  |
| 18.663992 | 12.420909 | 15.664891  | 9.708283   | 5.384713  | 6.1372123  |
| 18.663992 | 12.420909 | 15.664891  | 9.708283   | 5.384713  | 6.1372123  |
| 488.4312  | 801.43964 | 542.6534   | 601.3684   | 11.374494 | 11.874908  |
| 28.370453 | 63.914978 | 123.1409   | 103.086815 | 9.568935  | 9.920622   |
| 28.370453 | 63.914978 | 123.1409   | 103.086815 | 9.568935  | 9.920622   |

|           |            |           |           |           |            |
|-----------|------------|-----------|-----------|-----------|------------|
| 9.727071  | 10.256634  | 9.21145   | 9.836981  | 8.19243   | 8.922047   |
| 3.4712727 | 6.0635896  | 3.4931533 | 4.9850144 | 2.3467326 | 2.4279919  |
| 3.4712727 | 6.0635896  | 3.4931533 | 4.9850144 | 2.3467326 | 2.4279919  |
| 11.055225 | 12.01908   | 10.641948 | 11.278831 | 6.6556563 | 6.942311   |
| 11.253813 | 11.399617  | 11.1805   | 11.331601 | 10.374018 | 10.500271  |
| 8.256207  | 9.541262   | 8.319926  | 8.893606  | 6.5142684 | 6.4654284  |
| 6.764355  | 5.355869   | 5.474269  | 5.525732  | 4.811007  | 2.4279919  |
| 6.764355  | 5.355869   | 5.474269  | 5.525732  | 4.811007  | 2.4279919  |
| 6.764355  | 5.355869   | 5.474269  | 5.525732  | 4.811007  | 2.4279919  |
| 8.433738  | 5.043697   | 8.894863  | 8.369729  | 4.5369043 | 5.011071   |
| 4.618368  | 4.041284   | 4.8119617 | 4.5791698 | 4.3711762 | 3.8884676  |
| 5.755429  | 4.6513805  | 5.675479  | 5.3402696 | 4.040421  | 4.26334    |
| 6.463109  | 5.9885716  | 7.1676574 | 6.859638  | 5.6024175 | 5.1689596  |
| 7.574728  | 7.0110326  | 8.193386  | 7.860731  | 5.812874  | 6.281397   |
| 4.4878187 | 4.4438443  | 4.2696924 | 4.063881  | 4.140906  | 2.4279919  |
| 5.339797  | 3.5207248  | 6.362803  | 5.7578397 | 2.5981882 | 4.164884   |
| 7.309578  | 6.028187   | 8.344078  | 7.3118896 | 5.781161  | 4.890941   |
| 6.6784725 | 5.242817   | 5.214876  | 5.3669186 | 5.720097  | 3.956422   |
| 6.6784725 | 5.242817   | 5.214876  | 5.3669186 | 5.720097  | 3.956422   |
| 6.6784725 | 5.242817   | 5.214876  | 5.3669186 | 5.720097  | 3.956422   |
| 5.1656566 | 5.566763   | 4.8322387 | 5.2712846 | 4.1987853 | 3.8973804  |
| 5.1656566 | 5.566763   | 4.8322387 | 5.2712846 | 4.1987853 | 3.8973804  |
| 13.924151 | 14.477176  | 14.691475 | 14.574759 | 12.655313 | 11.6324625 |
| 6.9594364 | 7.510168   | 5.0766845 | 6.8592806 | 3.9159763 | 4.483424   |
| 5.2342877 | 4.65289    | 5.636147  | 5.222901  | 5.0186114 | 4.041816   |
| 3.6479502 | 3.528763   | 3.8534138 | 3.8070812 | 3.8283544 | 2.4279919  |
| 7.554172  | 6.75786    | 8.721255  | 8.273411  | 7.05524   | 6.3301992  |
| 10.529305 | 9.704905   | 9.357468  | 9.609529  | 8.564204  | 4.8031573  |
| 5.2758613 | 5.5704274  | 5.21203   | 5.0173407 | 4.559358  | 3.6882637  |
| 5.2758613 | 5.5704274  | 5.21203   | 5.0173407 | 4.559358  | 3.6882637  |
| 3.8226523 | 4.7827826  | 4.472847  | 4.587409  | 3.413261  | 4.247084   |
| 6.9397388 | 6.501886   | 7.511914  | 7.274063  | 5.9257536 | 6.290818   |
| 6.9397388 | 6.501886   | 7.511914  | 7.274063  | 5.9257536 | 6.290818   |
| 6.9397388 | 6.501886   | 7.511914  | 7.274063  | 5.9257536 | 6.290818   |
| 7.0055604 | 4.4554214  | 4.941365  | 4.8187933 | 4.7074065 | 3.254265   |
| 10.629704 | 10.736275  | 10.172247 | 10.483632 | 8.515199  | 8.821781   |
| 5.410706  | 4.687648   | 4.5133567 | 4.7832866 | 2.5640197 | 2.4279919  |
| 10.587137 | 11.514311  | 10.490754 | 11.116988 | 9.555412  | 9.785257   |
| 10.587137 | 11.514311  | 10.490754 | 11.116988 | 9.555412  | 9.785257   |
| 10.587137 | 11.514311  | 10.490754 | 11.116988 | 9.555412  | 9.785257   |
| 6.404019  | 5.972224   | 7.4453163 | 7.0405917 | 6.1351995 | 6.015731   |
| 8.896035  | 9.185014   | 10.337179 | 9.9549465 | 7.4649067 | 8.407342   |
| 7.755659  | 7.397591   | 5.4155555 | 6.3584294 | 4.660527  | 5.7585306  |
| 6.7419257 | 7.344145   | 6.763552  | 7.1908607 | 5.923102  | 6.620828   |
| 6.7419257 | 7.344145   | 6.763552  | 7.1908607 | 5.923102  | 6.620828   |
| 6.7419257 | 7.344145   | 6.763552  | 7.1908607 | 5.923102  | 6.620828   |
| 6.7419257 | 7.344145   | 6.763552  | 7.1908607 | 5.923102  | 6.620828   |
| 6.7419257 | 7.344145   | 6.763552  | 7.1908607 | 5.923102  | 6.620828   |
| 3.7938292 | 3.3852472  | 6.2194715 | 5.6374507 | 2.83208   | 3.9077265  |
| 10.875775 | 10.9322405 | 10.208466 | 10.475327 | 9.423069  | 8.470265   |
| 10.280668 | 8.181859   | 10.720492 | 10.179638 | 9.150122  | 9.053056   |
| 5.304887  | 4.3778663  | 5.2947197 | 5.127019  | 4.631235  | 3.9798257  |
| 4.9819813 | 4.9431906  | 4.9767184 | 4.6566615 | 4.144236  | 3.6200628  |
| 6.8194356 | 7.8401413  | 5.5431128 | 6.800193  | 4.8980455 | 4.732089   |
| 6.8194356 | 7.8401413  | 5.5431128 | 6.800193  | 4.8980455 | 4.732089   |
| 6.8194356 | 7.8401413  | 5.5431128 | 6.800193  | 4.8980455 | 4.732089   |
| 8.47346   | 7.6548643  | 9.6525545 | 9.024214  | 8.587746  | 8.489169   |
| 4.253834  | 5.2777257  | 5.4796605 | 5.2479434 | 3.478808  | 3.6240544  |
| 4.253834  | 5.2777257  | 5.4796605 | 5.2479434 | 3.478808  | 3.6240544  |
| 10.419105 | 11.409957  | 10.782239 | 11.013427 | 9.58526   | 10.256634  |
| 9.185387  | 8.069192   | 8.083456  | 8.005108  | 6.4734306 | 7.7106805  |
| 9.185387  | 8.069192   | 8.083456  | 8.005108  | 6.4734306 | 7.7106805  |

|           |           |           |           |
|-----------|-----------|-----------|-----------|
| 7.50101   | 9.238177  | 7.757298  | 8.504936  |
| 2.350709  | 2.3408759 | 2.3618152 | 2.352752  |
| 2.350709  | 2.3408759 | 2.3618152 | 2.352752  |
| 6.30517   | 8.210383  | 5.168317  | 7.279526  |
| 10.288283 | 10.22388  | 9.895008  | 10.005093 |
| 6.9282484 | 6.5080023 | 7.158849  | 6.8030853 |
| 5.5353613 | 2.3408759 | 5.075209  | 4.361504  |
| 5.5353613 | 2.3408759 | 5.075209  | 4.361504  |
| 5.5353613 | 2.3408759 | 5.075209  | 4.361504  |
| 2.8514273 | 3.4979916 | 2.3618152 | 3.994277  |
| 4.5967603 | 2.8618555 | 3.5339692 | 2.7984915 |
| 4.40739   | 2.8589454 | 3.6353405 | 3.1934094 |
| 6.621921  | 5.3061304 | 6.0082607 | 5.5280437 |
| 5.6131773 | 5.525881  | 6.976121  | 6.4691224 |
| 4.358217  | 2.3408759 | 4.0249    | 2.352752  |
| 2.6839373 | 2.5896928 | 4.14717   | 3.7866628 |
| 6.6288233 | 4.5820193 | 5.1119375 | 4.817517  |
| 6.3448944 | 3.7032332 | 3.0564768 | 3.884795  |
| 6.3448944 | 3.7032332 | 3.0564768 | 3.884795  |
| 6.3448944 | 3.7032332 | 3.0564768 | 3.884795  |
| 3.3755584 | 4.02563   | 5.0290437 | 4.503066  |
| 3.3755584 | 4.02563   | 5.0290437 | 4.503066  |
| 13.027055 | 13.278634 | 13.8879   | 13.585656 |
| 3.4992163 | 3.781071  | 4.381456  | 3.4960139 |
| 5.2458887 | 3.8185854 | 4.2967763 | 3.735219  |
| 2.350709  | 2.3408759 | 2.3618152 | 2.352752  |
| 7.8448186 | 5.6697598 | 5.685433  | 5.710718  |
| 9.284413  | 5.1153426 | 7.198279  | 6.506043  |
| 4.601352  | 4.0480566 | 4.0174313 | 4.2294583 |
| 4.601352  | 4.0480566 | 4.0174313 | 4.2294583 |
| 3.7574043 | 3.7616313 | 3.235806  | 3.2551823 |
| 5.6682925 | 4.8995256 | 6.159394  | 5.374466  |
| 5.6682925 | 4.8995256 | 6.159394  | 5.374466  |
| 5.6682925 | 4.8995256 | 6.159394  | 5.374466  |
| 4.6603103 | 3.9279792 | 4.739351  | 4.5297704 |
| 8.388277  | 8.478105  | 8.953883  | 8.608215  |
| 2.350709  | 3.0177178 | 2.3618152 | 2.352752  |
| 9.464466  | 9.580778  | 9.169953  | 9.236385  |
| 9.464466  | 9.580778  | 9.169953  | 9.236385  |
| 9.464466  | 9.580778  | 9.169953  | 9.236385  |
| 6.5651445 | 5.7898073 | 5.6769366 | 5.8929386 |
| 7.6942043 | 7.7867117 | 8.557705  | 8.296971  |
| 2.8592703 | 6.001797  | 4.872952  | 5.4750257 |
| 5.7719064 | 5.816449  | 5.7611837 | 5.7476487 |
| 5.7719064 | 5.816449  | 5.7611837 | 5.7476487 |
| 5.7719064 | 5.816449  | 5.7611837 | 5.7476487 |
| 5.7719064 | 5.816449  | 5.7611837 | 5.7476487 |
| 5.7719064 | 5.816449  | 5.7611837 | 5.7476487 |
| 2.350709  | 2.3408759 | 2.3618152 | 2.352752  |
| 9.8901825 | 8.544217  | 9.638668  | 9.222402  |
| 9.383112  | 7.779081  | 8.149844  | 7.8237214 |
| 4.7728124 | 3.9104486 | 4.4020104 | 3.3555567 |
| 4.5102587 | 3.598264  | 3.4145653 | 4.07252   |
| 5.1659017 | 5.683706  | 5.8925796 | 5.5843134 |
| 5.1659017 | 5.683706  | 5.8925796 | 5.5843134 |
| 5.1659017 | 5.683706  | 5.8925796 | 5.5843134 |
| 8.681981  | 7.600642  | 7.9956307 | 7.9884896 |
| 4.2714405 | 3.7510884 | 4.241205  | 3.5654917 |
| 4.2714405 | 3.7510884 | 4.241205  | 3.5654917 |
| 8.8879595 | 10.117644 | 9.314806  | 9.783263  |
| 4.848854  | 6.2990246 | 7.1931014 | 7.150374  |
| 4.848854  | 6.2990246 | 7.1931014 | 7.150374  |

|                      |                    |                    |                  |           |                  |
|----------------------|--------------------|--------------------|------------------|-----------|------------------|
| ASHGA5P014887        | 0.01045986         | 0.063149534        | 4.5721492        | up        | noncoding        |
| ASHGA5P045880        | 0.00845124         | 0.057522562        | 2.2049152        | up        | noncoding        |
| ASHGA5P022359        | 0.002575394        | 0.032855824        | 2.1335703        | up        | noncoding        |
| <b>ASHGA5P045028</b> | <b>0.001185203</b> | <b>0.023096268</b> | <b>3.6820409</b> | <b>up</b> | <b>noncoding</b> |
| ASHGA5P041906        | 0.004152119        | 0.041138537        | 2.1642458        | up        | noncoding        |
| ASHGA5P041906        | 0.004152119        | 0.041138537        | 2.1642458        | up        | noncoding        |
| ASHGA5P041906        | 0.004152119        | 0.041138537        | 2.1642458        | up        | noncoding        |
| ASHGA5P048422        | 0.00056374         | 0.016101946        | 2.398143         | up        | noncoding        |
| ASHGA5P030640        | 0.005314763        | 0.046390935        | 2.2626943        | up        | noncoding        |
| ASHGA5P017388        | 0.017539755        | 0.080495745        | 2.6182577        | up        | noncoding        |
| ASHGA5P040638        | 0.003954456        | 0.040405952        | 2.3926077        | up        | noncoding        |
| ASHGA5P040638        | 0.003954456        | 0.040405952        | 2.3926077        | up        | noncoding        |
| ASHGA5P021404        | 0.002531392        | 0.032654253        | 2.283424         | up        | noncoding        |
| ASHGA5P028900        | 0.008657065        | 0.058001887        | 3.4027216        | up        | noncoding        |
| ASHGA5P023339        | 0.000272626        | 0.012302262        | 2.247572         | up        | noncoding        |
| ASHGA5P052689        | 0.021627649        | 0.090752239        | 2.5822204        | up        | noncoding        |
| ASHGA5P030387        | 0.013690177        | 0.071698418        | 2.6646257        | up        | noncoding        |
| ASHGA5P029552        | 0.00356323         | 0.038481895        | 3.6347998        | up        | noncoding        |
| ASHGA5P026041        | 0.005125704        | 0.045497848        | 2.8395486        | up        | noncoding        |
| ASHGA5P019506        | 0.011724241        | 0.066689086        | 2.1534914        | up        | noncoding        |
| ASHGA5P048553        | 0.001667504        | 0.027358136        | 2.1344125        | up        | noncoding        |
| ASHGA5P030947        | 0.000810408        | 0.019071379        | 2.4392689        | up        | noncoding        |
| ASHGA5P000116        | 0.002134637        | 0.030485504        | 4.7372513        | up        | noncoding        |
| ASHGA5P025995        | 0.005934312        | 0.049073045        | 2.3549067        | up        | noncoding        |
| ASHGA5P025995        | 0.005934312        | 0.049073045        | 2.3549067        | up        | noncoding        |
| ASHGA5P025995        | 0.005934312        | 0.049073045        | 2.3549067        | up        | noncoding        |
| ASHGA5P025995        | 0.005934312        | 0.049073045        | 2.3549067        | up        | noncoding        |
| ASHGA5P025995        | 0.005934312        | 0.049073045        | 2.3549067        | up        | noncoding        |
| ASHGA5P025995        | 0.005934312        | 0.049073045        | 2.3549067        | up        | noncoding        |
| ASHGA5P025995        | 0.005934312        | 0.049073045        | 2.3549067        | up        | noncoding        |
| ASHGA5P044743        | 0.007955137        | 0.056185826        | 4.3426706        | up        | noncoding        |
| ASHGA5P038215        | 0.016804637        | 0.078960288        | 4.0145475        | up        | noncoding        |
| ASHGA5P034343        | 0.001885708        | 0.02911661         | 2.7280626        | up        | noncoding        |
| ASHGA5P057892        | 0.020518111        | 0.087886164        | 2.4538737        | up        | noncoding        |
| ASHGA5P027696        | 0.003683154        | 0.038896709        | 17.9711102       | up        | noncoding        |
| ASHGA5P033503        | 0.000952622        | 0.021003113        | 2.8749459        | up        | noncoding        |
| ASHGA5P048336        | 0.016356369        | 0.078078429        | 2.4249653        | up        | noncoding        |
| ASHGA5P044072        | 0.01224925         | 0.067744715        | 2.6136247        | up        | noncoding        |
| ASHGA5P023567        | 0.004670435        | 0.043513602        | 2.7280627        | up        | noncoding        |
| ASHGA5P037228        | 0.018730408        | 0.08321024         | 2.8138237        | up        | noncoding        |
| ASHGA5P053573        | 0.020897704        | 0.088917985        | 2.2305383        | up        | noncoding        |
| ASHGA5P053262        | 0.001060396        | 0.022031747        | 2.176224         | up        | noncoding        |
| ASHGA5P014028        | 0.007035556        | 0.052947146        | 2.5393138        | up        | noncoding        |
| ASHGA5P042495        | 0.020348649        | 0.087506775        | 2.0889793        | up        | noncoding        |
| ASHGA5P047650        | 0.028431403        | 0.105108746        | 2.2473286        | up        | noncoding        |
| ASHGA5P022821        | 0.000398784        | 0.014223693        | 3.0100697        | up        | noncoding        |
| ASHGA5P019234        | 0.002520538        | 0.03258252         | 2.2386059        | up        | noncoding        |
| ASHGA5P019234        | 0.002520538        | 0.03258252         | 2.2386059        | up        | noncoding        |
| ASHGA5P030541        | 0.003046383        | 0.03574339         | 2.7813412        | up        | noncoding        |
| ASHGA5P030541        | 0.003046383        | 0.03574339         | 2.7813412        | up        | noncoding        |
| ASHGA5P044573        | 0.004732978        | 0.043738988        | 3.4631541        | up        | noncoding        |
| ASHGA5P018515        | 0.001431581        | 0.025327629        | 3.1072061        | up        | noncoding        |
| ASHGA5P018515        | 0.001431581        | 0.025327629        | 3.1072061        | up        | noncoding        |
| ASHGA5P018515        | 0.001431581        | 0.025327629        | 3.1072061        | up        | noncoding        |
| ASHGA5P033644        | 0.048777581        | 0.143521005        | 2.8582194        | up        | noncoding        |
| ASHGA5P044229        | 0.00201138         | 0.029606317        | 2.5626929        | up        | noncoding        |
| ASHGA5P028560        | 0.001862294        | 0.028981608        | 3.4395242        | up        | noncoding        |
| ASHGA5P043238        | 1.95683E-05        | 0.004838692        | 2.9105228        | up        | noncoding        |
| ASHGA5P043238        | 1.95683E-05        | 0.004838692        | 2.9105228        | up        | noncoding        |
| ASHGA5P043238        | 1.95683E-05        | 0.004838692        | 2.9105228        | up        | noncoding        |
| ASHGA5P044200        | 8.3709E-06         | 0.004010044        | 3.5830757        | up        | noncoding        |
| ASHGA5P044202        | 0.002154038        | 0.030562731        | 3.6857986        | up        | noncoding        |

|                        |                |                     |            |             |          |
|------------------------|----------------|---------------------|------------|-------------|----------|
| ENST00000414386        | RP11-328M4.2   | GENCODE             | 419        | chr6        | -        |
| TCONS_00001692         | XLOC_001050    | LincRNAs identified | 451        | chr1        | -        |
| ENST00000555186        | CHEK2P2        | GENCODE             | 864        | chr15       | +        |
| <b>ENST00000520913</b> | <b>PVT1</b>    | <b>GENCODE</b>      | <b>584</b> | <b>chr8</b> | <b>+</b> |
| ENST00000423099        | RP11-505P4.6   | GENCODE             | 370        | chr6        | -        |
| ENST00000423099        | RP11-505P4.6   | GENCODE             | 370        | chr6        | -        |
| ENST00000423099        | RP11-505P4.6   | GENCODE             | 370        | chr6        | -        |
| ENST00000532422        | RP11-677I18.3  | GENCODE             | 826        | chr11       | -        |
| ENST00000562313        | RP11-226L15.5  | GENCODE             | 1842       | chr1        | -        |
| ENST00000449351        | SNHG11         | GENCODE             | 954        | chr20       | +        |
| ENST00000503529        | CTC-210G5.1    | GENCODE             | 579        | chr5        | -        |
| ENST00000503529        | CTC-210G5.1    | GENCODE             | 579        | chr5        | -        |
| ENST00000531887        | OR5G5P         | GENCODE             | 163        | chr11       | -        |
| NR_027350              | MIR17HG        | RefSeq              | 5018       | chr13       | +        |
| ENST00000578831        | RP11-739L10.1  | GENCODE             | 570        | chr18       | -        |
| NR_044997              | HCG25          | RefSeq              | 703        | chr6        | +        |
| ENST00000507787        | HERC2P9        | GENCODE             | 1023       | chr15       | +        |
| ENST00000555969        | RP11-589M4.1   | GENCODE             | 898        | chr14       | +        |
| ENST00000564354        | RP11-680F20.10 | GENCODE             | 808        | chr11       | -        |
| NR_051968              | MRPS2          | RefSeq              | 1714       | chr9        | +        |
| ENST00000566448        | CHEK2P2        | GENCODE             | 670        | chr15       | +        |
| ENST00000566787        | RP11-27M24.3   | GENCODE             | 502        | chr16       | -        |
| BG185325               |                | LincRNAs identified | 236        | chr8        | +        |
| NR_049781              | VRK2           | RefSeq              | 1916       | chr2        | +        |
| NR_049781              | VRK2           | RefSeq              | 1916       | chr2        | +        |
| NR_049781              | VRK2           | RefSeq              | 1916       | chr2        | +        |
| NR_049781              | VRK2           | RefSeq              | 1916       | chr2        | +        |
| NR_049781              | VRK2           | RefSeq              | 1916       | chr2        | +        |
| NR_049781              | VRK2           | RefSeq              | 1916       | chr2        | +        |
| NR_049781              | VRK2           | RefSeq              | 1916       | chr2        | +        |
| ENST00000412855        | RP11-396C23.2  | GENCODE             | 407        | chr1        | +        |
| uc001czn.3             | BC042048       | UCSC_knowngene      | 528        | chr1        | +        |
| TCONS_00003752         | XLOC_001550    | LincRNAs identified | 930        | chr2        | +        |
| TCONS_00023349         | XLOC_011211    | LincRNAs identified | 393        | chr15       | +        |
| ENST00000397340        | RP11-474D1.3   | GENCODE             | 3528       | chr12       | -        |
| ENST00000581725        | RP11-146G7.3   | GENCODE             | 1902       | chr18       | -        |
| ENST00000571090        | RP11-111M22.3  | GENCODE             | 2608       | chr11       | -        |
| ENST00000520570        | RP11-134O21.1  | GENCODE             | 582        | chr8        | -        |
| ENST00000584686        | SNHG15         | GENCODE             | 541        | chr7        | -        |
| ENST00000446404        | AP000402.3     | GENCODE             | 540        | chr21       | -        |
| ENST00000440959        | RP5-1180C10.2  | GENCODE             | 2547       | chr1        | -        |
| ENST00000437450        | AC002467.5     | GENCODE             | 670        | chr7        | +        |
| uc001cjj.3             | LOC100132774   | UCSC_knowngene      | 924        | chr1        | -        |
| TCONS_00020749         | XLOC_010037    | LincRNAs identified | 1077       | chr12       | -        |
| ENST00000442188        | RP11-107I14.2  | GENCODE             | 382        | chr10       | +        |
| NR_037620              | ORC6           | RefSeq              | 1703       | chr16       | +        |
| NR_033835              | PIGA           | RefSeq              | 3270       | chrX        | -        |
| NR_033835              | PIGA           | RefSeq              | 3270       | chrX        | -        |
| ENST00000559672        | RP11-108K3.2   | GENCODE             | 794        | chr15       | +        |
| ENST00000559672        | RP11-108K3.2   | GENCODE             | 794        | chr15       | +        |
| ENST00000517411        | RP13-582O9.5   | GENCODE             | 645        | chr8        | -        |
| NR_033231              | SMPD4          | RefSeq              | 3777       | chr2        | -        |
| NR_033231              | SMPD4          | RefSeq              | 3777       | chr2        | -        |
| NR_033231              | SMPD4          | RefSeq              | 3777       | chr2        | -        |
| ENST00000579923        | RP11-106E15.1  | GENCODE             | 302        | chr18       | -        |
| ENST00000524133        | RP11-360L9.7   | GENCODE             | 570        | chr8        | -        |
| uc001vdv.3             | DLEU2          | UCSC_knowngene      | 972        | chr13       | -        |
| ENST00000412754        | RP11-126L15.4  | GENCODE             | 369        | chr7        | -        |
| ENST00000412754        | RP11-126L15.4  | GENCODE             | 369        | chr7        | -        |
| ENST00000412754        | RP11-126L15.4  | GENCODE             | 369        | chr7        | -        |
| ENST00000520431        | RP11-527N22.2  | GENCODE             | 578        | chr8        | -        |
| ENST00000519691        | RP11-150O12.3  | GENCODE             | 2379       | chr8        | -        |



|           |           |                  |                            |                             |
|-----------|-----------|------------------|----------------------------|-----------------------------|
| 41491632  | 41513914  |                  | ACGTGGGGAGAAGACGTGAGGCGG   | bidirectional               |
| 157019845 | 157021546 |                  | CCGTCAGCTATTCAATCAAGCATTG  | intergenic                  |
| 20487996  | 20496811  |                  | GGCAGAATAGAT               | 646096 intergenic           |
| 128902891 | 128944941 |                  | AGACATGGTACC               | 5820 intergenic             |
| 74201747  | 74202465  |                  | GAGAGCTCTGCAAATATATGAAAGT  | natural antisense           |
| 74201747  | 74202465  |                  | GAGAGCTCTGCAAATATATGAAAGT  | natural antisense           |
| 74201747  | 74202465  |                  | GAGAGCTCTGCAAATATATGAAAGT  | natural antisense           |
| 105956716 | 105972649 |                  | TCCTAAGAGCAACTGCAACAAAATG  | natural antisense           |
| 159994742 | 159996584 |                  | GCTGTTCTGGCACTGTAAACTTGAA  | intergenic                  |
| 37075343  | 37079564  | ENST00000440918  | CCCAAGGCCGGC               | 128439 intergenic           |
| 121772948 | 121814775 |                  | GGTTTTTGGATATGAATTTGTCATT  | intronic antisense          |
| 121772948 | 121814775 |                  | GGTTTTTGGATATGAATTTGTCATT  | intronic antisense          |
| 56569551  | 56587123  |                  | TTTATTATAGTGGTGTGATCATCTTC | intergenic                  |
| 92000073  | 92006829  |                  | GGAAAGAAAGCA               | 407975 intergenic           |
| 20279443  | 20513727  |                  | TCCGGGTGGGGCAGAAGAATCTTTT  | intronic antisense          |
| 33217312  | 33222667  |                  | CAGCAGCCTCCG               | 414765 natural antisense    |
| 28834637  | 28836269  |                  | AAAGTCGTGTAG               | 440248 intergenic           |
| 53241954  | 53244458  |                  | CAGAGGACCTTAGATGTCCCACTAT  | natural antisense           |
| 125742925 | 125744293 |                  | ATTTTTTTGTGGTGTGTTGCTTATTG | intergenic                  |
| 138392476 | 138396519 |                  | AACCTGTAAGGT               | 51116 exon sense-overlappi  |
| 20488734  | 20496839  |                  | TGAATTTTAGAT               | 646096 intergenic           |
| 10608698  | 10622059  |                  | CGGCATAAAGTAGAACATTCTTACA  | intergenic                  |
| 122348053 | 122424931 |                  | CCACATTGGAACAAGGCTTCTTAAG  | intergenic                  |
| 58273776  | 58387055  |                  | TCCCCACAAATA               | 7444 exon sense-overlappi   |
| 58273776  | 58387055  |                  | TCCCCACAAATA               | 7444 exon sense-overlappi   |
| 58273776  | 58387055  |                  | TCCCCACAAATA               | 7444 exon sense-overlappi   |
| 58273776  | 58387055  |                  | TCCCCACAAATA               | 7444 exon sense-overlappi   |
| 58273776  | 58387055  |                  | TCCCCACAAATA               | 7444 exon sense-overlappi   |
| 58273776  | 58387055  |                  | TCCCCACAAATA               | 7444 exon sense-overlappi   |
| 58273776  | 58387055  |                  | TCCCCACAAATA               | 7444 natural antisense      |
| 58273776  | 58387055  |                  | TCCCCACAAATA               | 7444 natural antisense      |
| 226274581 | 226277993 | uc001hpx.3       | GCAAACAAATCTTTACTTGATGAGA  | intergenic                  |
| 60238466  | 60254501  |                  | ATGTCAAAATTCCTTCTCCATAGG   | intergenic                  |
| 85190234  | 85194331  |                  | AAGAGTCCGTATGCTGGAAAAGCAC  | intergenic                  |
| 36743228  | 36777325  |                  | AAAGCAAAAGAAACCAGCATATCA   | intergenic                  |
| 130517998 | 130526887 | ENST00000538806, | CAGATATTTAGATAATATTTTCCCA  | intergenic                  |
| 6919494   | 6929804   |                  | CAAGAAGAAAGCTTCCCTACACATT  | intergenic                  |
| 76153116  | 76155724  |                  | GTACACCTTGTTACAGAGCTCAGAA  | bidirectional               |
| 2558973   | 2585957   |                  | GCATTTTGCCCGTTTGTCTGTCATT  | intergenic                  |
| 45023445  | 45026267  | ENST00000584327  | AAGCAGTCTTCA               | (285958 intergenic          |
| 26258989  | 26275070  |                  | GCACTGCCTTGATTGTACACGCCCT  | intergenic                  |
| 180241736 | 180245359 |                  | GAGAACAGTTATGATTCTTTGCAAA  | natural antisense           |
| 107383246 | 107384360 |                  | CTCTAAGAGGTCAATGTAATAATCT  | exon sense-overlappi        |
| 44165355  | 44173012  | ENST00000398804  | TCCAGAAGCAGT               | 100132774 natural antisense |
| 29294263  | 29301212  |                  | CAACCAGGAAGTGCTGAAAAACGGC  | intergenic                  |
| 103070774 | 103071262 |                  | TCACATTCCCTAAATACTAATGGCA  | intergenic                  |
| 46723557  | 46732306  |                  | GGGCCCTCAGGA               | 23594 exon sense-overlappi  |
| 15337572  | 15353676  |                  | CATTGCTCAGGG               | 5277 exon sense-overlappi   |
| 15337572  | 15353676  |                  | CATTGCTCAGGG               | 5277 exon sense-overlappi   |
| 51600433  | 51614193  |                  | AAAGGAAGAGAAACCCATCAACATC  | intronic antisense          |
| 51600433  | 51614193  |                  | AAAGGAAGAGAAACCCATCAACATC  | intronic antisense          |
| 144362335 | 144363830 | ENST00000523031  | GCTTGAAATTTCCAAGGTCGATTTTC | intergenic                  |
| 130908964 | 130939330 |                  | TCCAGCAAAGTG               | 55627 exon sense-overlappi  |
| 130908964 | 130939330 |                  | TCCAGCAAAGTG               | 55627 exon sense-overlappi  |
| 130908964 | 130939330 |                  | TCCAGCAAAGTG               | 55627 exon sense-overlappi  |
| 66420415  | 66421820  |                  | GCACGAAAAGTGTAAGAATTGACAT  | intronic antisense          |
| 41397899  | 41402563  |                  | AATTTACTGTGGTTTTAGAGGATGT  | natural antisense           |
| 50618047  | 50619368  | ENST00000235290, | CTTGAACCCTTT               | 8847 intergenic             |
| 100434935 | 100450238 |                  | TACGGGCGGGTCGTCCTCTCCACCA  | bidirectional               |
| 100434935 | 100450238 |                  | TACGGGCGGGTCGTCCTCTCCACCA  | bidirectional               |
| 100434935 | 100450238 |                  | TACGGGCGGGTCGTCCTCTCCACCA  | bidirectional               |
| 37262956  | 37264242  |                  | GTGACAGAGTTTGCATAGAGATGGC  | intergenic                  |
| 37454997  | 37457376  |                  | CAGAACAAATGCATGCAAACCTTGC  | intergenic                  |

|              |          |                          |           |           |
|--------------|----------|--------------------------|-----------|-----------|
| NM_138457    | FOXP4    | forkhead box protein +   | 41514163  | 41570122  |
| NM_001123226 | MTO1     | protein MTO1 homo +      | 74171453  | 74211179  |
| NM_012123    | MTO1     | protein MTO1 homo +      | 74171453  | 74211179  |
| NM_133645    | MTO1     | protein MTO1 homo +      | 74171453  | 74211179  |
| NM_015423    | AASDHPPT | L-aminoadipate-semi +    | 105948291 | 105969419 |
| NM_001242935 | SNCAIP   | synphilin-1 isoform 1 +  | 121647819 | 121799794 |
| NM_005460    | SNCAIP   | synphilin-1 isoform 1 +  | 121647819 | 121799794 |
| NM_002894    | RBBP8    | DNA endonuclease F +     | 20513294  | 20606449  |
| NM_022553    | VPS52    | vacuolar protein sorti - | 33218048  | 33239662  |
| NM_198066    | GNPNAT1  | glucosamine 6-phosp -    | 53241910  | 53258386  |
| NM_016034    | MRPS2    | 28S ribosomal protei +   | 138392476 | 138396519 |
| NM_001130480 | VRK2     | serine/threonine-prot +  | 58273776  | 58387055  |
| NM_001130481 | VRK2     | serine/threonine-prot +  | 58273846  | 58387055  |
| NM_001130482 | VRK2     | serine/threonine-prot +  | 58273776  | 58387055  |
| NM_001130483 | VRK2     | serine/threonine-prot +  | 58273776  | 58387055  |
| NM_006296    | VRK2     | serine/threonine-prot +  | 58273776  | 58387055  |
| NM_001114636 | FANCL    | E3 ubiquitin-protein -   | 58386377  | 58468515  |
| NM_018062    | FANCL    | E3 ubiquitin-protein -   | 58386377  | 58468515  |
| NM_020193    | C11orf30 | protein EMSY +           | 76156068  | 76262589  |
| NM_033343    | LHX4     | LIM/homeobox prote +     | 180199432 | 180244188 |
| NM_024814    | CBLL1    | E3 ubiquitin-protein +   | 107384278 | 107402083 |
| NM_014663    | KDM4A    | lysine-specific demet +  | 44115796  | 44171189  |
| NM_014321    | ORC6     | origin recognition co +  | 46723557  | 46732306  |
| NM_002641    | PIGA     | phosphatidylinositol -   | 15337572  | 15353676  |
| NM_020473    | PIGA     | phosphatidylinositol -   | 15337572  | 15353676  |
| NM_000103    | CYP19A1  | cytochrome P450 19.-     | 51500253  | 51630795  |
| NM_031226    | CYP19A1  | cytochrome P450 19.-     | 51500253  | 51630795  |
| NM_001171083 | SMPD4    | sphingomyelin phosph -   | 130908964 | 130939330 |
| NM_017751    | SMPD4    | sphingomyelin phosph -   | 130908964 | 130939330 |
| NM_017951    | SMPD4    | sphingomyelin phosph -   | 130908964 | 130939330 |
| NM_001093729 | CCDC102B | coiled-coil domain-ci +  | 66382490  | 66722426  |
| NM_032336    | GINS4    | DNA replication con +    | 41386724  | 41402565  |
| NM_001267812 | SLC12A9  | solute carrier family +  | 100450340 | 100463160 |
| NM_001267814 | SLC12A9  | solute carrier family +  | 100450340 | 100463160 |
| NM_020246    | SLC12A9  | solute carrier family +  | 100450340 | 100464634 |

|                    |                   |                  |                 |                  |                  |
|--------------------|-------------------|------------------|-----------------|------------------|------------------|
| 679.765795         | 85.14315          | 8.80545          | 6.612578        | 1053.9535        | 1244.8535        |
| 50.374123          | 16.149314         | 5.292639         | 4.151916        | 60.142967        | 64.14926         |
| 1042.7363          | 296.725387        | 9.621102         | 8.527832        | 1142.3381        | 1118.856         |
| <b>2077.956883</b> | <b>319.763082</b> | <b>10.506151</b> | <b>8.625646</b> | <b>1822.0737</b> | <b>1507.1025</b> |
| 139.022275         | 37.641169         | 6.488675         | 5.37481         | 143.12788        | 232.10596        |
| 139.022275         | 37.641169         | 6.488675         | 5.37481         | 143.12788        | 232.10596        |
| 139.022275         | 37.641169         | 6.488675         | 5.37481         | 143.12788        | 232.10596        |
| 42.444531          | 11.704979         | 5.061332         | 3.799415        | 48.35843         | 43.66983         |
| 2364.1251          | 651.026203        | 10.741553        | 9.563511        | 2372.2085        | 1999.5952        |
| 377.998985         | 101.261505        | 8.108989         | 6.720382        | 306.33218        | 492.21564        |
| 807.940238         | 239.097911        | 9.111008         | 7.852424        | 784.28406        | 304.41248        |
| 807.940238         | 239.097911        | 9.111008         | 7.852424        | 784.28406        | 304.41248        |
| 61.847301          | 18.182869         | 5.564838         | 4.373639        | 82.47011         | 69.746           |
| 1675.992742        | 272.054042        | 10.19032         | 8.423631        | 2412.0322        | 2464.4675        |
| 130.518609         | 36.338358         | 6.650301         | 5.481933        | 161.61023        | 151.73343        |
| 70.887411          | 19.901299         | 5.681934         | 4.313322        | 80.13581         | 89.317665        |
| 162.962123         | 48.253804         | 6.926574         | 5.512641        | 206.71596        | 244.68762        |
| 115.812298         | 21.037967         | 6.458941         | 4.597065        | 96.599106        | 98.24008         |
| 29.657885          | 7.109764          | 4.356514         | 2.850852        | 34.89477         | 7.5787725        |
| 170.256477         | 48.636952         | 6.990521         | 5.883844        | 192.83769        | 223.39728        |
| 947.169117         | 268.997583        | 9.485969         | 8.39213         | 983.9219         | 1016.94806       |
| 176.443362         | 45.737336         | 7.088831         | 5.802383        | 175.34848        | 142.4207         |
| 50.218072          | 7.808878          | 5.147569         | 2.903519        | 28.828463        | 15.312428        |
| 364.604675         | 90.991815         | 8.073304         | 6.837634        | 352.58942        | 192.00157        |
| 364.604675         | 90.991815         | 8.073304         | 6.837634        | 352.58942        | 192.00157        |
| 364.604675         | 90.991815         | 8.073304         | 6.837634        | 352.58942        | 192.00157        |
| 364.604675         | 90.991815         | 8.073304         | 6.837634        | 352.58942        | 192.00157        |
| 364.604675         | 90.991815         | 8.073304         | 6.837634        | 352.58942        | 192.00157        |
| 364.604675         | 90.991815         | 8.073304         | 6.837634        | 352.58942        | 192.00157        |
| 364.604675         | 90.991815         | 8.073304         | 6.837634        | 352.58942        | 192.00157        |
| 364.604675         | 90.991815         | 8.073304         | 6.837634        | 352.58942        | 192.00157        |
| 859.944907         | 119.652114        | 9.272537         | 7.153954        | 1077.5099        | 724.1927         |
| 129.591356         | 17.315431         | 6.30651          | 4.301272        | 138.58441        | 34.847008        |
| 36.944746          | 9.222667          | 4.847715         | 3.399838        | 32.991272        | 27.714941        |
| 31.987092          | 9.332176          | 4.619948         | 3.324887        | 43.035675        | 33.926487        |
| 1498.786032        | 94.616238         | 9.463438         | 5.29583         | 2659.6238        | 4270.3755        |
| 176.730079         | 34.586455         | 6.682532         | 5.158997        | 221.48785        | 33.37344         |
| 93.340735          | 29.515703         | 6.178098         | 4.900134        | 82.66092         | 66.77338         |
| 102.227439         | 20.956216         | 6.033007         | 4.646955        | 150.73607        | 197.08679        |
| 1078.6394          | 227.666518        | 9.605766         | 8.15789         | 1215.5621        | 1598.3105        |
| 39.14571           | 7.840596          | 4.61303          | 3.120499        | 66.25631         | 80.30266         |
| 26.819003          | 8.567705          | 4.362501         | 3.20511         | 25.665838        | 25.610258        |
| 27.784145          | 8.274089          | 4.423925         | 3.302098        | 38.00504         | 26.222681        |
| 85.646296          | 20.711472         | 5.953243         | 4.608804        | 124.7942         | 94.2576          |
| 141.075249         | 42.28462          | 6.6952           | 5.632401        | 179.30476        | 242.94312        |
| 30.912255          | 12.167679         | 4.603345         | 3.435134        | 44.08478         | 28.414165        |
| 94.546347          | 20.546574         | 6.198516         | 4.608719        | 97.54164         | 94.64154         |
| 48.788466          | 14.583297         | 5.249569         | 4.086968        | 52.461105        | 34.567715        |
| 48.788466          | 14.583297         | 5.249569         | 4.086968        | 52.461105        | 34.567715        |
| 1355.85455         | 231.953763        | 9.629662         | 8.153882        | 1895.3737        | 3271.0457        |
| 1355.85455         | 231.953763        | 9.629662         | 8.153882        | 1895.3737        | 3271.0457        |
| 2586.481717        | 423.647847        | 10.821391        | 9.029304        | 2213.0234        | 2083.9465        |
| 85.117596          | 17.411954         | 5.972205         | 4.336587        | 110.15943        | 135.04347        |
| 85.117596          | 17.411954         | 5.972205         | 4.336587        | 110.15943        | 135.04347        |
| 85.117596          | 17.411954         | 5.972205         | 4.336587        | 110.15943        | 135.04347        |
| 37.456537          | 7.83041           | 4.456925         | 2.941809        | 30.703587        | 4.9999995        |
| 27.867089          | 6.78966           | 4.413724         | 3.056063        | 20.81631         | 18.631714        |
| 676.785223         | 103.399277        | 8.735659         | 6.95345         | 1078.0128        | 539.2249         |
| 461.743705         | 94.792184         | 8.438256         | 6.896978        | 555.7028         | 550.7101         |
| 461.743705         | 94.792184         | 8.438256         | 6.896978        | 555.7028         | 550.7101         |
| 461.743705         | 94.792184         | 8.438256         | 6.896978        | 555.7028         | 550.7101         |
| 22.962252          | 5                 | 4.204678         | 2.363479        | 20.09248         | 22.170746        |
| 7923.217117        | 1215.774767       | 12.442371        | 10.560394       | 10877.105        | 11812.968        |

|                 |                  |                  |                  |                 |                  |
|-----------------|------------------|------------------|------------------|-----------------|------------------|
| 741.25977       | 334.68777        | 322.47833        | 381.3619         | 76.07163        | 116.274124       |
| 48.186977       | 55.6933          | 32.95054         | 41.121696        | 19.533312       | 8.973085         |
| 865.06415       | 1162.1503        | 820.87885        | 1147.1304        | 226.48688       | 169.99866        |
| <b>2097.524</b> | <b>3770.5967</b> | <b>1037.4742</b> | <b>2232.9702</b> | <b>273.0964</b> | <b>326.62878</b> |
| 33.312992       | 215.0929         | 60.972008        | 149.52191        | 31.236282       | 36.373775        |
| 33.312992       | 215.0929         | 60.972008        | 149.52191        | 31.236282       | 36.373775        |
| 33.312992       | 215.0929         | 60.972008        | 149.52191        | 31.236282       | 36.373775        |
| 34.765915       | 46.441833        | 29.817976        | 51.6132          | 12.73324        | 9.016196         |
| 2248.502        | 3422.2996        | 1362.2003        | 2779.945         | 729.446         | 313.77896        |
| 297.0118        | 201.42094        | 544.01135        | 427.002          | 113.41691       | 34.35386         |
| 977.28937       | 418.91592        | 1175.6917        | 1187.0479        | 342.9245        | 54.360767        |
| 977.28937       | 418.91592        | 1175.6917        | 1187.0479        | 342.9245        | 54.360767        |
| 63.38044        | 71.36145         | 31.041702        | 53.084103        | 23.722464       | 8.98363          |
| 1783.996        | 728.08795        | 1280.4832        | 1386.8896        | 247.9306        | 257.6948         |
| 95.774376       | 124.04309        | 99.69502         | 150.25551        | 40.975346       | 27.347624        |
| 46.511715       | 30.890625        | 94.90651         | 83.56214         | 23.605902       | 14.228391        |
| 143.68169       | 96.18614         | 134.52533        | 151.976          | 66.15984        | 26.70026         |
| 79.18693        | 159.8894         | 95.24857         | 165.7097         | 27.028278       | 14.222089        |
| 40.30842        | 19.398357        | 23.16812         | 52.598873        | 6.2542086       | 4.9999995        |
| 77.30818        | 195.1234         | 154.71353        | 178.15878        | 51.48749        | 38.005444        |
| 792.8191        | 1040.7556        | 744.02264        | 1104.5474        | 207.27559       | 158.24315        |
| 163.40251       | 153.14838        | 183.8502         | 240.4899         | 30.68631        | 32.88291         |
| 64.59719        | 79.67975         | 41.844433        | 71.046165        | 8.634929        | 4.9999995        |
| 482.87863       | 277.10233        | 392.6686         | 490.3875         | 90.3978         | 77.76285         |
| 482.87863       | 277.10233        | 392.6686         | 490.3875         | 90.3978         | 77.76285         |
| 482.87863       | 277.10233        | 392.6686         | 490.3875         | 90.3978         | 77.76285         |
| 482.87863       | 277.10233        | 392.6686         | 490.3875         | 90.3978         | 77.76285         |
| 482.87863       | 277.10233        | 392.6686         | 490.3875         | 90.3978         | 77.76285         |
| 482.87863       | 277.10233        | 392.6686         | 490.3875         | 90.3978         | 77.76285         |
| 482.87863       | 277.10233        | 392.6686         | 490.3875         | 90.3978         | 77.76285         |
| 1040.0919       | 374.30807        | 851.51697        | 1092.0499        | 143.42285       | 177.247          |
| 197.16302       | 246.9714         | 27.82079         | 132.16151        | 26.44223        | 10.390111        |
| 29.05639        | 51.436054        | 29.703184        | 50.766632        | 6.285104        | 6.7972593        |
| 28.733326       | 42.911194        | 14.83793         | 28.477938        | 4.9999995       | 5.4958086        |
| 672.09125       | 288.74033        | 544.20416        | 557.68115        | 177.45503       | 317.88177        |
| 387.88788       | 50.361794        | 205.88           | 161.38951        | 41.223923       | 8.843164         |
| 102.348305      | 110.121605       | 77.78452         | 120.35568        | 28.403433       | 5.2174864        |
| 98.47845        | 24.936659        | 76.53856         | 65.588104        | 25.049782       | 16.00239         |
| 1043.2642       | 1073.7195        | 543.5009         | 997.4792         | 221.00288       | 262.10852        |
| 18.994326       | 11.773661        | 32.07835         | 25.468952        | 9.155903        | 6.6837025        |
| 15.608109       | 40.895817        | 17.686213        | 35.447784        | 7.114459        | 4.9999995        |
| 32.9016         | 16.316732        | 26.382065        | 26.876749        | 8.275476        | 7.5881114        |
| 131.6809        | 45.071735        | 51.49704         | 66.5763          | 25.067299       | 9.930493         |
| 93.53277        | 102.2273         | 106.924805       | 121.51874        | 38.997658       | 23.443058        |
| 28.175505       | 23.58911         | 32.277412        | 28.932556        | 19.973608       | 5.0696683        |
| 63.264385       | 119.143295       | 87.31611         | 105.37111        | 29.394674       | 11.672572        |
| 60.456924       | 40.799595        | 41.34646         | 63.098995        | 16.131779       | 13.206341        |
| 60.456924       | 40.799595        | 41.34646         | 63.098995        | 16.131779       | 13.206341        |
| 311.23187       | 694.1433         | 949.29193        | 1014.0408        | 263.8068        | 373.31693        |
| 311.23187       | 694.1433         | 949.29193        | 1014.0408        | 263.8068        | 373.31693        |
| 1870.9268       | 4398.2285        | 1534.3047        | 3418.4604        | 491.65048       | 413.0122         |
| 65.26337        | 46.296223        | 70.98844         | 82.95464         | 21.79773        | 10.9557705       |
| 65.26337        | 46.296223        | 70.98844         | 82.95464         | 21.79773        | 10.9557705       |
| 65.26337        | 46.296223        | 70.98844         | 82.95464         | 21.79773        | 10.9557705       |
| 61.113564       | 14.903361        | 60.502163        | 52.51655         | 13.370808       | 4.9999995        |
| 17.308737       | 38.939735        | 34.822544        | 36.683495        | 7.708559        | 5.8793364        |
| 1447.4685       | 264.02887        | 341.40817        | 390.5681         | 121.8491        | 58.854282        |
| 453.26834       | 479.99564        | 280.25775        | 450.5276         | 107.008804      | 69.86095         |
| 453.26834       | 479.99564        | 280.25775        | 450.5276         | 107.008804      | 69.86095         |
| 453.26834       | 479.99564        | 280.25775        | 450.5276         | 107.008804      | 69.86095         |
| 20.63054        | 30.39274         | 22.338518        | 22.148487        | 4.9999995       | 4.9999995        |
| 8661.685        | 4960.5103        | 4836.5044        | 6390.53          | 1036.653        | 768.6137         |

|                  |                  |                  |                  |                  |                  |
|------------------|------------------|------------------|------------------|------------------|------------------|
| 28.370453        | 63.914978        | 123.1409         | 103.086815       | 9.568935         | 9.920622         |
| 31.794104        | 11.081131        | 9.683162         | 15.831091        | 5.4512715        | 5.832843         |
| 281.10678        | 338.2549         | 438.3374         | 326.1677         | 9.68511          | 9.77977          |
| <b>200.87605</b> | <b>550.39606</b> | <b>221.85207</b> | <b>345.72913</b> | <b>10.352169</b> | <b>10.177752</b> |
| 22.115263        | 83.314545        | 14.690829        | 38.11632         | 6.7098274        | 7.60107          |
| 22.115263        | 83.314545        | 14.690829        | 38.11632         | 6.7098274        | 7.60107          |
| 22.115263        | 83.314545        | 14.690829        | 38.11632         | 6.7098274        | 7.60107          |
| 17.35589         | 10.560021        | 11.176979        | 9.387548         | 5.13557          | 5.333505         |
| 1380.9827        | 457.01743        | 576.66315        | 448.26898        | 10.731882        | 10.548714        |
| 244.87872        | 60.03534         | 85.41136         | 69.47284         | 7.8063107        | 8.630488         |
| 521.6628         | 88.97867         | 288.24203        | 138.4187         | 9.1556835        | 7.9789886        |
| 521.6628         | 88.97867         | 288.24203        | 138.4187         | 9.1556835        | 7.9789886        |
| 26.731184        | 17.69621         | 10.476661        | 21.487064        | 5.9139695        | 5.948052         |
| 191.33873        | 437.3221         | 241.98842        | 256.0496         | 10.753808        | 10.847031        |
| 48.542282        | 29.574648        | 36.406166        | 35.18408         | 6.880004         | 7.009277         |
| 49.585896        | 8.819269         | 13.8707          | 9.297635         | 5.8713107        | 6.2758226        |
| 109.4663         | 11.5949          | 53.20358         | 22.397943        | 7.238327         | 7.6682215        |
| 33.776894        | 11.980461        | 21.985449        | 17.234629        | 6.1462817        | 6.40302          |
| 13.085819        | 4.9999995        | 8.318557         | 4.9999995        | 4.664701         | 3.0539074        |
| 65.347206        | 32.490585        | 61.951355        | 42.53963         | 7.1401796        | 7.547325         |
| 250.26782        | 317.87463        | 379.35953        | 300.96478        | 9.474733         | 9.648809         |
| 36.395702        | 58.342857        | 61.25263         | 54.86361         | 6.9998484        | 6.923353         |
| 16.442488        | 6.7758503        | 4.9999995        | 4.9999995        | 4.396659         | 3.955556         |
| 82.38914         | 88.61263         | 122.17741        | 84.61106         | 8.007133         | 7.3420224        |
| 82.38914         | 88.61263         | 122.17741        | 84.61106         | 8.007133         | 7.3420224        |
| 82.38914         | 88.61263         | 122.17741        | 84.61106         | 8.007133         | 7.3420224        |
| 82.38914         | 88.61263         | 122.17741        | 84.61106         | 8.007133         | 7.3420224        |
| 82.38914         | 88.61263         | 122.17741        | 84.61106         | 8.007133         | 7.3420224        |
| 82.38914         | 88.61263         | 122.17741        | 84.61106         | 8.007133         | 7.3420224        |
| 82.38914         | 88.61263         | 122.17741        | 84.61106         | 8.007133         | 7.3420224        |
| 82.38914         | 88.61263         | 122.17741        | 84.61106         | 8.007133         | 7.3420224        |
| 67.000175        | 166.61488        | 78.10673         | 85.52105         | 9.598484         | 9.17943          |
| 24.58446         | 11.205129        | 18.875132        | 12.395521        | 6.6602583        | 5.039991         |
| 16.93047         | 8.208804         | 7.6584325        | 9.455935         | 4.583099         | 4.737006         |
| 18.23903         | 9.178678         | 10.370259        | 7.709279         | 4.9687037        | 5.0050797        |
| 4.9999995        | 45.394318        | 4.9999995        | 16.96631         | 10.890528        | 11.626885        |
| 58.986202        | 19.060303        | 50.550507        | 28.85463         | 7.34337          | 4.983366         |
| 44.898758        | 22.779152        | 47.025387        | 28.769999        | 5.9166517        | 5.8860703        |
| 27.171923        | 17.36898         | 25.60485         | 14.539369        | 6.779146         | 7.376218         |
| 120.13419        | 315.06595        | 210.0192         | 237.66837        | 9.774508         | 10.251916        |
| 12.697461        | 4.9999995        | 4.9999995        | 8.506513         | 5.591161         | 6.134455         |
| 12.860089        | 9.249876         | 10.00439         | 7.1774154        | 4.2230234        | 4.630823         |
| 9.092795         | 7.0647845        | 11.67079         | 5.952575         | 4.7836666        | 4.6623034        |
| 24.543499        | 21.60845         | 24.653778        | 18.465311        | 6.5128684        | 6.344739         |
| 55.027435        | 29.022873        | 68.19404         | 39.022655        | 7.0309734        | 7.65796          |
| 29.363583        | 4.9999995        | 8.599217         | 4.9999995        | 5.004211         | 4.7705865        |
| 19.3434          | 17.511803        | 23.989704        | 21.367292        | 6.1590247        | 6.3500853        |
| 22.237162        | 9.38642          | 16.81343         | 9.7246475        | 5.2455544        | 5.028482         |
| 22.237162        | 9.38642          | 16.81343         | 9.7246475        | 5.2455544        | 5.028482         |
| 154.46819        | 262.72156        | 149.45012        | 187.95898        | 10.40648         | 11.253372        |
| 154.46819        | 262.72156        | 149.45012        | 187.95898        | 10.40648         | 11.253372        |
| 668.5521         | 244.4995         | 424.9709         | 299.2019         | 10.635328        | 10.609558        |
| 26.610575        | 15.52134         | 18.577496        | 11.008811        | 6.334403         | 6.844835         |
| 26.610575        | 15.52134         | 18.577496        | 11.008811        | 6.334403         | 6.844835         |
| 26.610575        | 15.52134         | 18.577496        | 11.008811        | 6.334403         | 6.844835         |
| 11.53463         | 7.077025         | 4.9999995        | 4.9999995        | 4.4840164        | 2.3499577        |
| 6.58295          | 6.525096         | 6.75845          | 7.2835674        | 3.9207904        | 4.2088876        |
| 170.00421        | 81.154564        | 106.604996       | 81.92851         | 9.599325         | 8.765872         |
| 108.119514       | 111.761086       | 86.22131         | 85.78144         | 8.636986         | 8.795517         |
| 108.119514       | 111.761086       | 86.22131         | 85.78144         | 8.636986         | 8.795517         |
| 108.119514       | 111.761086       | 86.22131         | 85.78144         | 8.636986         | 8.795517         |
| 4.9999995        | 4.9999995        | 4.9999995        | 4.9999995        | 3.868803         | 4.433914         |
| 1501.12          | 721.8174         | 1963.2157        | 1303.2288        | 12.937954        | 13.073466        |

|                 |                  |                 |                  |                 |                 |
|-----------------|------------------|-----------------|------------------|-----------------|-----------------|
| 9.185387        | 8.069192         | 8.083456        | 8.005108         | 6.4734306       | 7.7106805       |
| 5.27341         | 5.4151297        | 4.899445        | 4.883735         | 4.524444        | 3.940665        |
| 9.403176        | 9.866453         | 9.415103        | 9.577            | 8.075701        | 8.256011        |
| <b>10.67865</b> | <b>11.535351</b> | <b>9.762024</b> | <b>10.530962</b> | <b>8.353953</b> | <b>9.211855</b> |
| 4.745681        | 7.439549         | 5.7393994       | 6.6965203        | 5.199497        | 6.033301        |
| 4.745681        | 7.439549         | 5.7393994       | 6.6965203        | 5.199497        | 6.033301        |
| 4.745681        | 7.439549         | 5.7393994       | 6.6965203        | 5.199497        | 6.033301        |
| 4.8057127       | 5.1352983        | 4.7566676       | 5.20124          | 3.8975403       | 3.9470742       |
| 10.787763       | 11.401575        | 10.136795       | 10.842588        | 9.811741        | 9.149743        |
| 7.8802357       | 7.3366446        | 8.834486        | 8.165771         | 7.06087         | 5.941716        |
| 9.560576        | 8.402716         | 9.935831        | 9.632255         | 8.687116        | 6.614456        |
| 9.560576        | 8.402716         | 9.935831        | 9.632255         | 8.687116        | 6.614456        |
| 5.6802406       | 5.7919316        | 4.814247        | 5.2405853        | 4.8094206       | 3.9419389       |
| 10.439191       | 9.201448         | 10.049246       | 9.851195         | 8.212599        | 8.866066        |
| 6.2588153       | 6.6233706        | 6.4259686       | 6.704368         | 5.5922737       | 5.6084337       |
| 5.219773        | 4.5024333        | 6.356907        | 5.8653555        | 4.8020067       | 4.6423035       |
| 6.8427434       | 6.2388854        | 6.848012        | 6.723254         | 6.2843747       | 5.5719695       |
| 5.990555        | 7.0019712        | 6.3630323       | 6.848785         | 4.994567        | 4.641411        |
| 5.0170918       | 3.7510884        | 4.4243255       | 5.227968         | 2.844999        | 2.4279919       |
| 5.958491        | 7.289172         | 7.0561333       | 6.951828         | 5.922295        | 6.089942        |
| 9.280705        | 9.708057         | 9.2780285       | 9.525483         | 7.940966        | 8.155844        |
| 7.0180564       | 6.9317765        | 7.2939515       | 7.366003         | 5.1729603       | 5.8777623       |
| 5.7079835       | 5.9564347        | 5.2283545       | 5.6404276        | 3.3201697       | 2.4279919       |
| 8.564828        | 7.7982454        | 8.364308        | 8.363289         | 6.7256374       | 7.1320114       |
| 8.564828        | 7.7982454        | 8.364308        | 8.363289         | 6.7256374       | 7.1320114       |
| 8.564828        | 7.7982454        | 8.364308        | 8.363289         | 6.7256374       | 7.1320114       |
| 8.564828        | 7.7982454        | 8.364308        | 8.363289         | 6.7256374       | 7.1320114       |
| 8.564828        | 7.7982454        | 8.364308        | 8.363289         | 6.7256374       | 7.1320114       |
| 8.564828        | 7.7982454        | 8.364308        | 8.363289         | 6.7256374       | 7.1320114       |
| 8.564828        | 7.7982454        | 8.364308        | 8.363289         | 6.7256374       | 7.1320114       |
| 9.647693        | 8.228717         | 9.475051        | 9.505845         | 7.395313        | 8.313027        |
| 7.308626        | 7.641995         | 4.668123        | 6.5200653        | 4.9652867       | 4.162794        |
| 4.552782        | 5.2899013        | 4.750262        | 5.1732373        | 2.8509417       | 3.5248582       |
| 4.5374103       | 5.0115256        | 3.819745        | 4.3772216        | 2.3467326       | 3.19566         |
| 9.027562        | 7.8594213        | 8.834897        | 8.541335         | 7.72486         | 9.171236        |
| 8.250728        | 5.2615566        | 7.447236        | 6.8089333        | 5.5998073       | 3.919333        |
| 6.3615          | 6.43821          | 6.0764217       | 6.3897324        | 5.0632734       | 3.111527        |
| 6.301192        | 4.1620407        | 6.053564        | 5.525881         | 4.88923         | 4.819709        |
| 9.653972        | 9.747459         | 8.833395        | 9.373349         | 8.039367        | 8.896035        |
| 3.9279792       | 2.9514513        | 4.8580565       | 4.21508          | 3.408402        | 3.500977        |
| 3.6418579       | 4.937386         | 4.0559616       | 4.685957         | 3.0235991       | 2.4279919       |
| 4.7282124       | 3.4752138        | 4.6017704       | 4.292384         | 3.2548506       | 3.6831756       |
| 6.7164097       | 5.0883117        | 5.508582        | 5.5485444        | 4.890824        | 4.0939226       |
| 6.224653        | 6.3266964        | 6.525436        | 6.4054785        | 5.517062        | 5.380506        |
| 4.5068436       | 4.0704474        | 4.8689246       | 4.3990583        | 4.553592        | 3.0711236       |
| 5.676843        | 6.5643873        | 6.2416773       | 6.1990805        | 5.1091943       | 4.3354993       |
| 5.60712         | 4.93216          | 5.2118726       | 5.472224         | 4.2443795       | 4.5249004       |
| 5.60712         | 4.93216          | 5.2118726       | 5.472224         | 4.2443795       | 4.5249004       |
| 7.9459085       | 9.134197         | 9.641011        | 9.397005         | 8.302611        | 9.413319        |
| 7.9459085       | 9.134197         | 9.641011        | 9.397005         | 8.302611        | 9.413319        |
| 10.51125        | 11.745006        | 10.304794       | 11.12241         | 9.2082615       | 9.553489        |
| 5.72143         | 5.130092         | 5.947675        | 5.8547955        | 4.6839733       | 4.24366         |
| 5.72143         | 5.130092         | 5.947675        | 5.8547955        | 4.6839733       | 4.24366         |
| 5.72143         | 5.130092         | 5.947675        | 5.8547955        | 4.6839733       | 4.24366         |
| 5.6231155       | 3.330637         | 5.7285686       | 5.225256         | 3.9688778       | 2.4279919       |
| 3.7928545       | 4.8600335        | 4.967521        | 4.732257         | 3.141049        | 3.3003044       |
| 10.121954       | 7.7294717        | 8.1610365       | 8.036295         | 7.161021        | 6.7297325       |
| 8.474561        | 8.592521         | 7.884934        | 8.245016         | 6.9781785       | 6.9742694       |
| 8.474561        | 8.592521         | 7.884934        | 8.245016         | 6.9781785       | 6.9742694       |
| 8.474561        | 8.592521         | 7.884934        | 8.245016         | 6.9781785       | 6.9742694       |
| 4.048906        | 4.47694          | 4.376144        | 4.0233607        | 2.3467326       | 2.4279919       |
| 12.73972        | 11.940308        | 11.934742       | 12.028038        | 10.32528        | 10.446188       |

|                 |                 |                 |                 |
|-----------------|-----------------|-----------------|-----------------|
| 4.848854        | 6.2990246       | 7.1931014       | 7.150374        |
| 5.0043287       | 3.5806754       | 3.556489        | 4.304893        |
| 8.080805        | 8.847735        | 9.015858        | 8.890884        |
| <b>7.600642</b> | <b>9.568935</b> | <b>8.047681</b> | <b>8.970808</b> |
| 4.5011563       | 6.7064342       | 4.1490726       | 5.6594          |
| 4.5011563       | 6.7064342       | 4.1490726       | 5.6594          |
| 4.5011563       | 6.7064342       | 4.1490726       | 5.6594          |
| 4.169465        | 3.506844        | 3.759072        | 3.516492        |
| 10.377842       | 9.284052        | 9.40276         | 9.354929        |
| 7.886544        | 6.1977954       | 6.669768        | 6.5656          |
| 8.981082        | 6.8084383       | 8.419452        | 7.6040025       |
| 8.981082        | 6.8084383       | 8.419452        | 7.6040025       |
| 4.7632113       | 4.2889414       | 3.6699626       | 4.7683587       |
| 7.5304184       | 9.221022        | 8.172513        | 8.539166        |
| 5.599554        | 5.0947185       | 5.4592195       | 5.5374002       |
| 5.630499        | 3.238737        | 4.0658145       | 3.5005684       |
| 6.739199        | 3.6484337       | 6.001797        | 4.830072        |
| 5.0909204       | 3.6937294       | 4.731419        | 4.430343        |
| 3.788291        | 2.3408759       | 3.3502028       | 2.352752        |
| 6.0102873       | 5.234422        | 6.2192883       | 5.826829        |
| 7.9146185       | 8.760494        | 8.806071        | 8.774788        |
| 5.1906757       | 6.1569686       | 6.202991        | 6.212938        |
| 4.097216        | 2.8611693       | 2.3618152       | 2.352752        |
| 6.332508        | 6.8006306       | 7.1805944       | 6.8544245       |
| 6.332508        | 6.8006306       | 7.1805944       | 6.8544245       |
| 6.332508        | 6.8006306       | 7.1805944       | 6.8544245       |
| 6.332508        | 6.8006306       | 7.1805944       | 6.8544245       |
| 6.332508        | 6.8006306       | 7.1805944       | 6.8544245       |
| 6.332508        | 6.8006306       | 7.1805944       | 6.8544245       |
| 6.332508        | 6.8006306       | 7.1805944       | 6.8544245       |
| 6.0461674       | 7.751947        | 6.5465245       | 6.870746        |
| 4.644471        | 3.5963895       | 4.5057125       | 3.9329805       |
| 4.138937        | 3.1255329       | 3.2329185       | 3.5258389       |
| 4.2433863       | 3.2912536       | 3.6561031       | 3.2161844       |
| 2.350709        | 5.7582207       | 2.3618152       | 4.4081416       |
| 5.868784        | 4.4054723       | 5.930689        | 5.2298956       |
| 5.4863777       | 4.6850863       | 5.829446        | 5.225091        |
| 4.786666        | 4.2621455       | 4.9485474       | 4.1754317       |
| 6.8683367       | 8.749801        | 7.9668875       | 8.426911        |
| 3.7477627       | 2.3408759       | 2.3618152       | 3.3631585       |
| 3.7651324       | 3.3054376       | 3.6030655       | 3.105431        |
| 3.303122        | 2.9155302       | 3.8195217       | 2.8363883       |
| 4.6426964       | 4.5999384       | 4.8945465       | 4.530895        |
| 5.77373         | 5.066552        | 6.358503        | 5.6980553       |
| 4.896122        | 2.3408759       | 3.3963394       | 2.352752        |
| 4.3209305       | 4.2729287       | 4.854783        | 4.758981        |
| 4.5079484       | 3.3295732       | 4.3466597       | 3.5683482       |
| 4.5079484       | 3.3295732       | 4.3466597       | 3.5683482       |
| 7.220653        | 8.467757        | 7.451296        | 8.067653        |
| 7.220653        | 8.467757        | 7.451296        | 8.067653        |
| 9.3244505       | 8.356528        | 8.96983         | 8.7632675       |
| 4.755535        | 4.097975        | 4.484213        | 3.7541666       |
| 4.755535        | 4.097975        | 4.484213        | 3.7541666       |
| 4.755535        | 4.097975        | 4.484213        | 3.7541666       |
| 3.622365        | 2.9170492       | 2.3618152       | 2.352752        |
| 2.8987508       | 2.8076916       | 3.0597517       | 3.128833        |
| 7.360831        | 6.669672        | 6.9915404       | 6.8079033       |
| 6.7205853       | 7.150624        | 6.6840997       | 6.8741083       |
| 6.7205853       | 7.150624        | 6.6840997       | 6.8741083       |
| 6.7205853       | 7.150624        | 6.6840997       | 6.8741083       |
| 2.350709        | 2.3408759       | 2.3618152       | 2.352752        |
| 10.4938545      | 9.963567        | 11.194374       | 10.939101       |

|               |             |             |           |    |           |
|---------------|-------------|-------------|-----------|----|-----------|
| ASHGA5P019373 | 0.002738397 | 0.033929075 | 2.3428346 | up | noncoding |
| ASHGA5P019373 | 0.002738397 | 0.033929075 | 2.3428346 | up | noncoding |
| ASHGA5P018940 | 0.019803701 | 0.085931879 | 2.0340309 | up | noncoding |
| ASHGA5P014614 | 0.002420678 | 0.032008799 | 3.6441374 | up | noncoding |
| ASHGA5P015663 | 0.041012225 | 0.129441514 | 3.4355488 | up | noncoding |
| ASHGA5P058458 | 0.008577715 | 0.057726152 | 3.5564035 | up | noncoding |
| ASHGA5P032685 | 0.029294936 | 0.10706631  | 2.1214872 | up | noncoding |
| ASHGA5P026851 | 0.020468167 | 0.08778085  | 2.6445963 | up | noncoding |
| ASHGA5P046404 | 0.007977332 | 0.05622546  | 2.2981537 | up | noncoding |
| ASHGA5P017787 | 0.033522754 | 0.115469453 | 3.2284453 | up | noncoding |
| ASHGA5P023257 | 1.42878E-06 | 0.001921139 | 3.0236657 | up | noncoding |
| ASHGA5P044810 | 0.000921575 | 0.020476941 | 4.4989534 | up | noncoding |
| ASHGA5P021330 | 0.029048836 | 0.106504196 | 2.1351048 | up | noncoding |
| ASHGA5P051211 | 0.00062236  | 0.016906436 | 3.7948895 | up | noncoding |
| ASHGA5P012461 | 1.06339E-05 | 0.004010044 | 4.4208286 | up | noncoding |
| ASHGA5P012461 | 1.06339E-05 | 0.004010044 | 4.4208286 | up | noncoding |
| ASHGA5P012461 | 1.06339E-05 | 0.004010044 | 4.4208286 | up | noncoding |
| ASHGA5P012461 | 1.06339E-05 | 0.004010044 | 4.4208286 | up | noncoding |
| ASHGA5P012461 | 1.06339E-05 | 0.004010044 | 4.4208286 | up | noncoding |
| ASHGA5P033100 | 0.002853873 | 0.034516291 | 4.0149355 | up | noncoding |
| ASHGA5P022833 | 0.017277622 | 0.080040435 | 2.1335774 | up | noncoding |
| ASHGA5P056071 | 0.002733859 | 0.033921403 | 2.2160055 | up | noncoding |
| ASHGA5P033340 | 0.035027063 | 0.118437866 | 2.2019658 | up | noncoding |
| ASHGA5P033340 | 0.035027063 | 0.118437866 | 2.2019658 | up | noncoding |
| ASHGA5P033151 | 0.001708576 | 0.027664864 | 2.3790617 | up | noncoding |
| ASHGA5P031531 | 0.000386926 | 0.014011107 | 2.8542567 | up | noncoding |
| ASHGA5P052947 | 0.013639077 | 0.071680418 | 2.5427593 | up | noncoding |
| ASHGA5P031299 | 0.000296051 | 0.012593001 | 3.6369143 | up | noncoding |
| ASHGA5P031299 | 0.000296051 | 0.012593001 | 3.6369143 | up | noncoding |
| ASHGA5P000575 | 0.002595719 | 0.032877969 | 3.0687617 | up | noncoding |
| ASHGA5P058494 | 0.029493368 | 0.107451211 | 2.0349105 | up | noncoding |
| ASHGA5P035977 | 0.004748664 | 0.043793775 | 2.1161031 | up | noncoding |
| ASHGA5P053967 | 0.00537183  | 0.046607024 | 5.0191242 | up | noncoding |



|                 |                |                     |      |       |   |
|-----------------|----------------|---------------------|------|-------|---|
| NR_024485       | LOC100130093   | RefSeq              | 2400 | chr1  | + |
| NR_024485       | LOC100130093   | RefSeq              | 2400 | chr1  | + |
| ENST00000475441 | SNHG12         | GENCODE             | 444  | chr1  | - |
| ENST00000411824 | RP11-93B14.5   | GENCODE             | 809  | chr20 | - |
| ENST00000422345 | RP11-108M9.1   | GENCODE             | 735  | chr1  | - |
| uc003tda.1      | DPY19L1P2      | UCSC_knowngene      | 1166 | chr7  | + |
| ENST00000572730 | RP11-334C17.5  | GENCODE             | 750  | chr17 | - |
| AW450413        |                | LincRNAs identified | 431  | chr7  | - |
| TCONS_00001386  | XLOC_000698    | LincRNAs identified | 430  | chr1  | - |
| ENST00000445739 | AC011322.1     | GENCODE             | 546  | chr3  | - |
| ENST00000576197 | RP11-1197K16.2 | GENCODE             | 401  | chr17 | + |
| ENST00000518942 | RP11-110G21.1  | GENCODE             | 816  | chr8  | + |
| NR_024596       | C11orf73       | RefSeq              | 1129 | chr11 | + |
| ENST00000414022 | TMEM191A       | GENCODE             | 466  | chr22 | + |
| NR_034181       | SUV39H2        | RefSeq              | 3002 | chr10 | + |
| NR_034181       | SUV39H2        | RefSeq              | 3002 | chr10 | + |
| NR_034181       | SUV39H2        | RefSeq              | 3002 | chr10 | + |
| NR_034181       | SUV39H2        | RefSeq              | 3002 | chr10 | + |
| NR_034181       | SUV39H2        | RefSeq              | 3002 | chr10 | + |
| ENST00000429227 | RP5-1061H20.4  | GENCODE             | 868  | chr1  | - |
| NR_040000       | LOC339166      | RefSeq              | 1851 | chr17 | + |
| TCONS_00027655  | XLOC_013195    | LincRNAs identified | 928  | chr19 | - |
| ENST00000583916 | RP11-171G2.1   | GENCODE             | 624  | chr17 | + |
| ENST00000583916 | RP11-171G2.1   | GENCODE             | 624  | chr17 | + |
| NR_026680       | MGC57346       | RefSeq              | 2110 | chr17 | + |
| ENST00000535363 | RP11-27M24.1   | GENCODE             | 533  | chr16 | + |
| NR_033960       | LOC442497      | RefSeq              | 2247 | chr7  | + |
| ENST00000456293 | GAS5           | GENCODE             | 583  | chr1  | - |
| ENST00000456293 | GAS5           | GENCODE             | 583  | chr1  | - |
| CX166999        |                | LincRNAs identified | 638  | chr1  | + |
| uc004azr.1      | DQ673971       | UCSC_knowngene      | 818  | chr9  | - |
| ENST00000577528 | RP4-594I10.3   | GENCODE             | 1445 | chr1  | - |
| uc004dgg.1      | AK098783       | UCSC_knowngene      | 1961 | chrX  | - |

|           |           |                     |                            |                       |
|-----------|-----------|---------------------|----------------------------|-----------------------|
| 227916239 | 227922055 |                     | TCAGGCCAGGT(100130093      | natural antisense     |
| 227916239 | 227922055 |                     | TCAGGCCAGGT(100130093      | natural antisense     |
| 28905049  | 28907741  | ENST00000461832,    | ACTTAAGCAGAT(85028         | natural antisense     |
| 61294370  | 61298076  |                     | GCACCACCAGTGTCTGCTGACTTGAA | natural antisense     |
| 17177815  | 17179624  | ENST00000457465     | CACAGGGCAGTGTCTTCTTGGTACT, | intergenic            |
| 32865913  | 32878356  |                     | AGTGAATTATTACATTCTAGAAAAG  | intron sense-overlapp |
| 78177631  | 78179748  |                     | GAGAGTGTGTAGCTCGGATTTAT    | natural antisense     |
| 25895917  | 25896427  |                     | TAATCATGAAGACGAGGGACGAAC   | intergenic            |
| 9509252   | 9514916   |                     | TTCAACAAGATTGTCTGGTGCAAAG  | intergenic            |
| 196710760 | 196713813 |                     | CACTGAAGGGTGTGTTTTAGAACCC  | intergenic            |
| 80938957  | 80939614  |                     | AGGAAATGAGGCTGGCTGAAAAATC  | intronic antisense    |
| 52811884  | 52859165  |                     | TTGCATTGAAGGACACGGTCTTACG  | bidirectional         |
| 86014397  | 86056985  |                     | CATAATCCTGGT(51501         | exon sense-overlappi  |
| 21057260  | 21058542  |                     | GGCTGTTCCGGC(84222         | intergenic            |
| 14920781  | 14946304  | NM_024670           | GCGCGAGGAGGA 79723         | exon sense-overlappi  |
| 14920781  | 14946304  | NM_024670           | GCGCGAGGAGGA 79723         | exon sense-overlappi  |
| 14920781  | 14946304  | NM_024670           | GCGCGAGGAGGA 79723         | exon sense-overlappi  |
| 14920781  | 14946304  | NM_024670           | GCGCGAGGAGGA 79723         | exon sense-overlappi  |
| 14920781  | 14946304  | NM_024670           | GCGCGAGGAGGA 79723         | exon sense-overlappi  |
| 229394027 | 229406750 |                     | TCTGTGATTCGAGTATCAGGAAATC  | bidirectional         |
| 5675553   | 5834016   |                     | AATGACCAAGGT(339166        | exon sense-overlappi  |
| 1246145   | 1248181   |                     | GACCAGATGCCAGAGCCAGTCTAA   | intergenic            |
| 70835177  | 70835857  |                     | CATTCAGAAGATACCTTTGGTCTCTC | intronic antisense    |
| 70835177  | 70835857  |                     | CATTCAGAAGATACCTTTGGTCTCTC | intronic antisense    |
| 43697711  | 43715329  | NR_027295           | GGTGCAAAGAGG 401884        | exon sense-overlappi  |
| 10623296  | 10625939  |                     | ATGTATTGCTTGAGGGGTCGATCT   | natural antisense     |
| 419390    | 422845    |                     | GAACAGGACTGA 442497        | intergenic            |
| 173834386 | 173837129 | ENST00000421068,    | CCTCCTAGTGCTC 60674        | bidirectional         |
| 173834386 | 173837129 | ENST00000421068,    | CCTCCTAGTGCTC 60674        | bidirectional         |
| 38893048  | 38911529  |                     | ACTGTGGAAGGGTTTGAATCACCTT  | intergenic            |
| 102121666 | 102132150 | uc004azm.1, uc004a: | TTTCAGCTTCTGGATTCATATCTGT  | intergenic            |
| 24865291  | 24882515  |                     | GATTTTTCTTATTCAGTGTTCAT    | bidirectional         |
| 45707326  | 45710447  |                     | TGCATATTAAGATCCTTTTTCAACA/ | intergenic            |

|                 |          |                          |           |           |
|-----------------|----------|--------------------------|-----------|-----------|
| NM_001161465    | JMJD4    | jmjC domain-contain-     | 227918889 | 227923112 |
| NM_023007       | JMJD4    | jmjC domain-contain-     | 227918889 | 227923112 |
| NM_017846       | TRNAU1AP | tRNA selenocysteine+     | 28879528  | 28905057  |
| NM_016354       | SLCO4A1  | solute carrier organic+  | 61273796  | 61303647  |
| ENST00000404479 | AVL9     | AVL9 homolog (S. c +     | 32535321  | 33078516  |
| NM_024110       | CARD14   | caspase recruitment c +  | 78152306  | 78183130  |
| NM_001009905    | B3GNTL1  | UDP-GlcNAc:betaG:-       | 80901666  | 81009686  |
| NM_052937       | PCMTD1   | protein-L-isoaspartat -  | 52730139  | 52811735  |
| NM_016401       | C11orf73 | protein Hikeshi +        | 86013252  | 86056985  |
| NM_001193424    | SUV39H2  | histone-lysine N-met+ +  | 14920781  | 14946304  |
| NM_001193425    | SUV39H2  | histone-lysine N-met+ +  | 14920864  | 14946304  |
| NM_001193426    | SUV39H2  | histone-lysine N-met+ +  | 14920781  | 14946304  |
| NM_001193427    | SUV39H2  | histone-lysine N-met+ +  | 14920864  | 14946304  |
| NM_024670       | SUV39H2  | histone-lysine N-met+ +  | 14920898  | 14946304  |
| NM_004578       | RAB4A    | ras-related protein R+ + | 229406878 | 229440518 |
| ENST00000573619 | WSCD1    | WSC domain contain+ +    | 5676245   | 5984112   |
| NM_001159770    | SLC39A11 | zinc transporter ZIP1-   | 70642084  | 71088853  |
| NM_139177       | SLC39A11 | zinc transporter ZIP1-   | 70642084  | 71088853  |
| NM_001256299    | CRHR1    | corticotropin-releasir + | 43697709  | 43913194  |
| NM_001424       | EMP2     | epithelial membrane -    | 10622278  | 10674539  |
| NM_001122770    | ZBTB37   | zinc finger and BTB +    | 173837492 | 173855774 |
| NM_032522       | ZBTB37   | zinc finger and BTB +    | 173837492 | 173842778 |
| NM_001010980    | NCMAP    | uncharacterized prote+ + | 24882566  | 24935818  |

|             |             |           |           |            |           |
|-------------|-------------|-----------|-----------|------------|-----------|
| 40.500956   | 11.943798   | 4.965411  | 3.737156  | 52.853024  | 56.941704 |
| 40.500956   | 11.943798   | 4.965411  | 3.737156  | 52.853024  | 56.941704 |
| 4525.755317 | 1372.823263 | 11.69951  | 10.675169 | 4685.418   | 4225.252  |
| 228.68474   | 33.68042    | 7.258025  | 5.392447  | 215.07085  | 199.1935  |
| 5239.6446   | 1074.59441  | 11.675376 | 9.894835  | 4839.7534  | 6018.0938 |
| 686.750932  | 125.462064  | 8.954229  | 7.12381   | 718.98773  | 354.50372 |
| 32.440137   | 12.33765    | 4.682919  | 3.597843  | 31.861757  | 29.47595  |
| 227.27035   | 46.022683   | 7.227503  | 5.824456  | 224.642    | 272.81384 |
| 61.326045   | 21.152975   | 5.56518   | 4.364705  | 83.68519   | 56.033085 |
| 56.621784   | 13.585416   | 5.241243  | 3.550404  | 64.81521   | 109.29993 |
| 55.642785   | 11.969827   | 5.412245  | 3.815946  | 72.308655  | 64.64433  |
| 56.824107   | 9.93667     | 5.392416  | 3.222827  | 77.34342   | 66.6551   |
| 2882.602967 | 761.723647  | 11.012283 | 9.917976  | 2415.849   | 2560.362  |
| 1469.77025  | 245.45113   | 10.08499  | 8.160932  | 2222.9377  | 1508.6127 |
| 219.107397  | 30.328249   | 7.371805  | 5.227489  | 204.71576  | 242.61075 |
| 219.107397  | 30.328249   | 7.371805  | 5.227489  | 204.71576  | 242.61075 |
| 219.107397  | 30.328249   | 7.371805  | 5.227489  | 204.71576  | 242.61075 |
| 219.107397  | 30.328249   | 7.371805  | 5.227489  | 204.71576  | 242.61075 |
| 219.107397  | 30.328249   | 7.371805  | 5.227489  | 204.71576  | 242.61075 |
| 175.186672  | 28.265112   | 7.030258  | 5.024881  | 168.753    | 141.20831 |
| 796.009218  | 249.189818  | 9.203284  | 8.110009  | 976.88245  | 883.1299  |
| 342.42225   | 88.973117   | 7.947711  | 6.79975   | 444.37747  | 592.18915 |
| 23.505641   | 6.993801    | 4.076864  | 2.938072  | 31.406464  | 20.28476  |
| 23.505641   | 6.993801    | 4.076864  | 2.938072  | 31.406464  | 20.28476  |
| 181.093453  | 47.441144   | 7.072927  | 5.822534  | 128.14688  | 110.58029 |
| 1414.816417 | 287.999573  | 10.045144 | 8.532029  | 1449.646   | 1391.5143 |
| 73.905846   | 34.189844   | 5.456441  | 4.110046  | 104.80111  | 32.80204  |
| 375.579753  | 63.780864   | 8.126867  | 6.264152  | 361.8695   | 288.62698 |
| 375.579753  | 63.780864   | 8.126867  | 6.264152  | 361.8695   | 288.62698 |
| 76.34809    | 18.100856   | 5.872657  | 4.255     | 106.422104 | 88.34934  |
| 16.791217   | 6.409846    | 3.660263  | 2.635298  | 19.749952  | 13.683208 |
| 80.306446   | 24.619154   | 5.90578   | 4.82437   | 82.78576   | 40.72563  |
| 231.598767  | 33.075758   | 7.418235  | 5.0908    | 166.90111  | 129.2711  |

|           |           |           |           |           |           |
|-----------|-----------|-----------|-----------|-----------|-----------|
| 36.556732 | 30.987158 | 32.63396  | 33.03316  | 13.775548 | 8.998206  |
| 36.556732 | 30.987158 | 32.63396  | 33.03316  | 13.775548 | 8.998206  |
| 4276.9663 | 5785.933  | 3131.987  | 5048.9756 | 1089.9519 | 546.33545 |
| 193.00731 | 442.65533 | 54.62179  | 267.55966 | 38.44713  | 30.429731 |
| 2441.1633 | 1419.2574 | 8057.1357 | 8662.464  | 1557.1019 | 335.60474 |
| 889.2016  | 421.06644 | 858.8308  | 877.9153  | 73.69416  | 91.78642  |
| 28.328756 | 43.380272 | 22.480162 | 39.113926 | 16.87987  | 4.9999995 |
| 141.16748 | 436.48572 | 54.10884  | 234.40422 | 45.564476 | 28.86494  |
| 68.8391   | 40.920113 | 51.57502  | 66.90376  | 27.815317 | 7.442774  |
| 33.933575 | 17.580803 | 53.52517  | 60.576015 | 23.756086 | 7.2761927 |
| 41.703423 | 74.31433  | 32.993706 | 47.892265 | 16.720263 | 10.537569 |
| 79.8143   | 28.079943 | 47.04305  | 42.008827 | 12.982498 | 4.9999995 |
| 2167.9807 | 1936.3533 | 3941.2068 | 4273.866  | 808.34735 | 1087.0299 |
| 1302.8403 | 1130.1927 | 1199.4506 | 1454.5875 | 218.28319 | 99.9612   |
| 127.96569 | 210.77133 | 221.98329 | 306.59756 | 27.304884 | 26.528    |
| 127.96569 | 210.77133 | 221.98329 | 306.59756 | 27.304884 | 26.528    |
| 127.96569 | 210.77133 | 221.98329 | 306.59756 | 27.304884 | 26.528    |
| 127.96569 | 210.77133 | 221.98329 | 306.59756 | 27.304884 | 26.528    |
| 127.96569 | 210.77133 | 221.98329 | 306.59756 | 27.304884 | 26.528    |
| 162.36284 | 273.56094 | 95.20284  | 210.0321  | 17.29351  | 16.79644  |
| 646.63306 | 461.9818  | 869.22626 | 938.20184 | 354.1168  | 142.47131 |
| 228.94998 | 282.57693 | 201.70215 | 304.73782 | 106.27458 | 65.65163  |
| 12.28259  | 18.01087  | 13.44482  | 45.604343 | 7.65543   | 10.166669 |
| 12.28259  | 18.01087  | 13.44482  | 45.604343 | 7.65543   | 10.166669 |
| 158.70377 | 277.84424 | 164.50287 | 246.78267 | 27.320656 | 33.59238  |
| 1462.4191 | 940.196   | 1581.1323 | 1663.9908 | 246.71678 | 241.50421 |
| 183.95993 | 17.52742  | 56.85093  | 47.493645 | 49.42177  | 4.9999995 |
| 377.5106  | 534.2651  | 228.76686 | 462.43948 | 74.20928  | 35.921265 |
| 377.5106  | 534.2651  | 228.76686 | 462.43948 | 74.20928  | 35.921265 |
| 58.851444 | 58.088947 | 62.85982  | 83.516884 | 30.303598 | 9.512895  |
| 17.764189 | 26.776838 | 5.0840125 | 17.6891   | 13.45908  | 4.9999995 |
| 107.57542 | 110.36242 | 46.368107 | 94.02134  | 35.435215 | 11.642201 |
| 191.1726  | 248.86342 | 308.20877 | 345.1756  | 51.06151  | 19.163164 |

|            |           |           |           |            |           |
|------------|-----------|-----------|-----------|------------|-----------|
| 22.859386  | 11.53359  | 7.189952  | 7.3061037 | 5.255651   | 5.676667  |
| 22.859386  | 11.53359  | 7.189952  | 7.3061037 | 5.255651   | 5.676667  |
| 1724.245   | 939.46783 | 2408.0684 | 1528.871  | 11.719634  | 11.611698 |
| 29.902328  | 42.67526  | 28.882719 | 31.74535  | 7.298137   | 7.389969  |
| 3179.5447  | 357.9537  | 629.97986 | 387.38156 | 11.753469  | 12.095535 |
| 55.946312  | 105.99121 | 277.0589  | 148.29538 | 9.020507   | 8.183102  |
| 20.04135   | 18.106232 | 5.4726562 | 8.525795  | 4.535043   | 4.818328  |
| 35.911198  | 55.363327 | 55.70854  | 54.723618 | 7.360831   | 7.824805  |
| 52.66212   | 14.09968  | 13.274098 | 11.623861 | 5.934437   | 5.656571  |
| 34.07824   | 5.6153636 | 4.9999995 | 5.786614  | 5.55934    | 6.5527864 |
| 9.134722   | 18.057482 | 7.180349  | 10.18858  | 5.7174973  | 5.8430877 |
| 16.801533  | 4.9999995 | 14.835991 | 4.9999995 | 5.819184   | 5.884157  |
| 442.21634  | 896.29443 | 663.1015  | 673.35236 | 10.756419  | 10.895147 |
| 401.8254   | 182.86548 | 368.10522 | 201.66629 | 10.643144  | 10.180511 |
| 29.53738   | 30.850822 | 41.26858  | 26.47983  | 7.2250257  | 7.6567955 |
| 29.53738   | 30.850822 | 41.26858  | 26.47983  | 7.2250257  | 7.6567955 |
| 29.53738   | 30.850822 | 41.26858  | 26.47983  | 7.2250257  | 7.6567955 |
| 29.53738   | 30.850822 | 41.26858  | 26.47983  | 7.2250257  | 7.6567955 |
| 29.53738   | 30.850822 | 41.26858  | 26.47983  | 7.2250257  | 7.6567955 |
| 20.49962   | 26.86792  | 50.44372  | 37.68946  | 6.943407   | 6.91127   |
| 534.9008   | 169.44739 | 141.11533 | 153.08728 | 9.463007   | 9.449045  |
| 106.847084 | 75.30096  | 96.51035  | 83.2541   | 8.323768   | 8.89725   |
| 9.140706   | 4.9999995 | 4.9999995 | 4.9999995 | 4.515896   | 4.3150325 |
| 9.140706   | 4.9999995 | 4.9999995 | 4.9999995 | 4.515896   | 4.3150325 |
| 32.32705   | 63.26309  | 68.31715  | 59.82654  | 6.551623   | 6.568746  |
| 263.4591   | 298.68555 | 383.17953 | 294.45227 | 10.0338955 | 10.072842 |
| 126.15086  | 4.9999995 | 11.29016  | 8.276276  | 6.2662735  | 4.958408  |
| 95.08665   | 53.814205 | 69.747345 | 53.906437 | 8.037419   | 7.902903  |
| 95.08665   | 53.814205 | 69.747345 | 53.906437 | 8.037419   | 7.902903  |
| 33.17379   | 10.899619 | 8.639275  | 16.07596  | 6.287452   | 6.261116  |
| 4.9999995  | 4.9999995 | 4.9999995 | 4.9999995 | 3.844818   | 3.8105896 |
| 35.185776  | 20.791143 | 24.703844 | 19.956747 | 5.91938    | 5.2409825 |
| 70.4647    | 26.570868 | 16.143408 | 15.050899 | 6.924693   | 6.783414  |

|           |           |            |           |           |           |
|-----------|-----------|------------|-----------|-----------|-----------|
| 4.876491  | 4.5086327 | 4.8840795  | 4.590945  | 4.010683  | 3.9438212 |
| 4.876491  | 4.5086327 | 4.8840795  | 4.590945  | 4.010683  | 3.9438212 |
| 11.710215 | 12.158989 | 11.321924  | 11.674601 | 10.389388 | 9.9533205 |
| 7.274791  | 8.480724  | 5.5888686  | 7.5156593 | 5.4991455 | 5.7658873 |
| 10.912378 | 10.150345 | 12.6610155 | 12.479512 | 10.909376 | 9.251125  |
| 9.430572  | 8.409232  | 9.490204   | 9.191759  | 6.431789  | 7.369813  |
| 4.515004  | 5.028482  | 4.3837647  | 4.8168936 | 4.3111634 | 2.4279919 |
| 6.818125  | 8.460256  | 5.5743656  | 7.326638  | 5.740194  | 5.6903105 |
| 5.794947  | 4.9389505 | 5.510723   | 5.5554514 | 5.0341306 | 3.6569169 |
| 4.7693167 | 3.592714  | 5.5577474  | 5.4155555 | 4.8120947 | 3.6244895 |
| 5.0626903 | 5.8556795 | 4.900607   | 5.0939074 | 4.295729  | 4.1842256 |
| 6.0035667 | 4.3466597 | 5.388265   | 4.912665  | 3.9233885 | 2.4279919 |
| 10.73358  | 10.591292 | 11.638906  | 11.458352 | 9.958928  | 10.964233 |
| 9.987953  | 9.820278  | 9.962795   | 9.91526   | 8.018048  | 7.49937   |
| 6.6782455 | 7.4070687 | 7.547723   | 7.7159743 | 5.0081215 | 5.56461   |
| 6.6782455 | 7.4070687 | 7.547723   | 7.7159743 | 5.0081215 | 5.56461   |
| 6.6782455 | 7.4070687 | 7.547723   | 7.7159743 | 5.0081215 | 5.56461   |
| 6.6782455 | 7.4070687 | 7.547723   | 7.7159743 | 5.0081215 | 5.56461   |
| 6.6782455 | 7.4070687 | 7.547723   | 7.7159743 | 5.0081215 | 5.56461   |
| 7.0105543 | 7.7754326 | 6.3622093  | 7.1786737 | 4.3499465 | 4.8860598 |
| 8.972414  | 8.536714  | 9.508995   | 9.289527  | 8.728452  | 8.004814  |
| 7.5159082 | 7.8234415 | 7.4187264  | 7.707172  | 6.9689827 | 6.8927608 |
| 3.290321  | 3.631518  | 3.6823473  | 5.026067  | 3.131765  | 4.1291914 |
| 3.290321  | 3.631518  | 3.6823473  | 5.026067  | 3.131765  | 4.1291914 |
| 6.976121  | 7.80188   | 7.135289   | 7.4039035 | 5.0094213 | 5.9085116 |
| 10.142613 | 9.557951  | 10.348855  | 10.11471  | 8.204572  | 8.767781  |
| 7.2014375 | 3.5869246 | 5.6418333  | 5.0837708 | 5.8599296 | 2.4279919 |
| 8.21139   | 8.74      | 7.593223   | 8.276265  | 6.439118  | 6.012279  |
| 8.21139   | 8.74      | 7.593223   | 8.276265  | 6.439118  | 6.012279  |
| 5.563604  | 5.4782276 | 5.781289   | 5.8642516 | 5.155034  | 4.0269637 |
| 3.830756  | 4.2785006 | 2.4739645  | 3.7229505 | 3.977643  | 2.4279919 |
| 6.431594  | 6.440709  | 5.3660274  | 6.035989  | 5.3808203 | 4.3314667 |
| 7.2576933 | 7.6520634 | 8.020663   | 7.870885  | 5.9098897 | 5.084915  |

|           |           |           |           |
|-----------|-----------|-----------|-----------|
| 4.546173  | 3.6406584 | 3.1468709 | 3.134729  |
| 4.546173  | 3.6406584 | 3.1468709 | 3.134729  |
| 10.692127 | 10.365895 | 11.487516 | 11.162765 |
| 4.9195175 | 5.6548414 | 5.1307707 | 5.3845224 |
| 11.603841 | 8.9389    | 9.529076  | 9.136693  |
| 5.7958097 | 7.076746  | 8.364308  | 7.7043962 |
| 4.368747  | 4.323081  | 2.789473  | 3.3666031 |
| 5.1700954 | 6.0718365 | 6.0653067 | 6.2089925 |
| 5.7095904 | 3.945613  | 4.0054483 | 3.8365288 |
| 5.1029253 | 2.6075516 | 2.3618152 | 2.7935462 |
| 3.309942  | 4.319272  | 3.1445363 | 3.6419725 |
| 4.128713  | 2.3408759 | 4.1632395 | 2.352752  |
| 8.748426  | 10.28197  | 9.600977  | 9.9533205 |
| 8.606754  | 7.9015408 | 8.762093  | 8.177788  |
| 4.9027133 | 5.1563654 | 5.6408777 | 5.092244  |
| 4.9027133 | 5.1563654 | 5.6408777 | 5.092244  |
| 4.9027133 | 5.1563654 | 5.6408777 | 5.092244  |
| 4.9027133 | 5.1563654 | 5.6408777 | 5.092244  |
| 4.9027133 | 5.1563654 | 5.6408777 | 5.092244  |
| 4.3985877 | 4.944685  | 5.926359  | 5.643648  |
| 9.015858  | 7.776702  | 7.377167  | 7.7570624 |
| 6.703638  | 6.5554075 | 6.8498535 | 6.827855  |
| 3.31203   | 2.3408759 | 2.3618152 | 2.352752  |
| 3.31203   | 2.3408759 | 2.3618152 | 2.352752  |
| 5.0268035 | 6.2824507 | 6.3613963 | 6.346623  |
| 7.988207  | 8.673475  | 8.821267  | 8.736874  |
| 6.939135  | 2.3408759 | 3.7711673 | 3.3211787 |
| 6.531945  | 6.027666  | 6.388048  | 6.1858544 |
| 6.531945  | 6.027666  | 6.388048  | 6.1858544 |
| 5.0630255 | 3.5547388 | 3.402621  | 4.3276176 |
| 2.350709  | 2.3408759 | 2.3618152 | 2.352752  |
| 5.1439953 | 4.5420656 | 4.8974514 | 4.650423  |
| 6.1098304 | 4.92615   | 4.2860208 | 4.227992  |
